# Supplementary material for: Physical Activity Rewires the Human Brain against Neurodegeneration
Source: MDPI journal article supplement (doi:10.3390/ijms23116223), 2022-06-02
Supplement: s1 [file s1]

Table S1. Microarrays analyzed in this study.

| <b>Accession number</b> | <b>Brain region</b>           | <b>Description of samples</b>                                  | <b>Platform</b>                                 |
|-------------------------|-------------------------------|----------------------------------------------------------------|-------------------------------------------------|
| GSE110298               | hippocampus                   | Physical activity level<br>Low: 11<br>Moderate: 11<br>High: 12 | Affymetrix Human Genome U133 Plus 2.0 Array     |
| GSE48350                | hippocampus                   | AD: 19<br>HC: 43                                               | Affymetrix Human Genome U133 Plus 2.0 Array     |
| GSE84422                | hippocampus                   | AD:18<br>HC:11                                                 | Affymetrix Human Genome U133A Array             |
| GSE36980                | hippocampus                   | AD:7<br>HC:10                                                  | Affymetrix Human Gene 1.0 ST Array              |
| GSE13162                | Hippocampus<br>Frontal cortex | FTD-GRN(+): 5<br>FTD-GRN(-): 8<br>HC: 2                        | Affymetrix Human Genome U133A Array             |
| GSE7621                 | Substantia nigra              | PD:16<br>HC: 9                                                 | Affymetrix Human Genome U133 Plus 2.0 Array     |
| GSE8397                 | Substantia nigra              | PD:24<br>HC:23                                                 | Affymetrix Human Genome U133 Array Set HG-U133A |
| GSE3790                 | Caudate nucleus               | HD:13<br>HC:32                                                 | Affymetrix Human Genome U133 Array Set HG-U133A |

AD: Alzheimer's disease; HC: Healthy controls; FTD-GRN (+): Frontotemporal dementia with progranulin mutations; FTD-GRN (-): Frontotemporal dementia without progranulin mutations; PD: Parkinson's disease; HD: Huntington's disease
