# Supplementary material for: Physical Activity Rewires the Human Brain against Neurodegeneration
Source: MDPI journal article supplement (doi:10.3390/ijms23116223), 2022-06-02
Supplement: s1 [file s1]

**Table S5. Gene ontology functional association of switch genes**

| <b>Switch gene</b>                                      | <b>Dataset</b>                 | <b>Gene ontology association</b>                                                                                                         |
|---------------------------------------------------------|--------------------------------|------------------------------------------------------------------------------------------------------------------------------------------|
| LPAR1 (Lysophosphatidic acid receptor 1)                | High physical activity         | Neurogenesis, regulation of metabolic process, positive regulation of MAPK, positive regulation of cytosolic Ca                          |
| SLC31A2 (Solute carrier family 31, member 2)            | High physical activity         | Copper ion transport and homeostasis                                                                                                     |
| MAP4K4 (Mitogen activated protein kinase 4)             | High physical activity         | Focal adhesion, microtubule binding, apoptosis, cell migration, MAPK cascade, JNK cascade, Alzheimer's disease                           |
| PAIP2B (Poly(A) binding protein interacting protein 2B) | High and low physical activity | Regulation of translation                                                                                                                |
| RAPGEF3 (Rap guanine nucleotide exchange factor 3)      | Low physical activity          | Guanyl-nucleotide exchange factor activity, Ras signal transduction, associative learning, protein acetylation, adaptive immune response |
| KLF15 (Kruppel like factor 15)                          | Low physical activity          | Regulation of transcription, glial cell differentiation, positive regulation of glucose import, glucose homeostasis, response to insulin |
| TNS1(Tensin 1)                                          | Low physical activity          | Focal adhesion, fibroblast migration, RNA binding                                                                                        |
| DOCK5 (Dedicator of cytokinesis 5)                      | Low physical activity          | Cell migration, guanyl-nucleotide exchange activity, epithelial and smooth muscle cell migration                                         |
| HIP1 (Huntingtin interacting protein 1)                 | Low physical activity          | Protein stabilization, presynapse, regulation of endocytosis, neurotransmitter receptor transport, ALS                                   |
| ADIPOR2 (Adiponectin receptor 2)                        | Low physical activity          | Adiponectin signaling, glucose homeostasis, vascular wound healing, lipid and fatty acid metabolism                                      |
| MECOM (MDS1 and EVI1 complex locus)                     | Low physical activity          | Regulation of cell cycle, programmed cell death, negative regulation of JNK, hematopoietic stem cell proliferation                       |
| TMEM88B (Transmembrane protein 88B)                     | Low physical activity          | PDZ domain binding                                                                                                                       |
| ARRDC2 (Arrestin domain containing 2)                   | Low physical activity          | Protein transport, protein binding                                                                                                       |
| CHD7 (Chromodomain helicase DNA binding protein7)       | Low physical activity          | Chromatin binding, histone binding, cranial nerve development, heart morphogenesis, olfactory behavior, neurogenesis, cognition          |
| CD9 (CD9 molecule)                                      | Low physical activity          | Glial cell migration, response to low density lipoprotein, cell                                                                          |

|                                                                      |                       |                                                                                                                     |
|----------------------------------------------------------------------|-----------------------|---------------------------------------------------------------------------------------------------------------------|
|                                                                      |                       | adhesion, platelet activation, Alzheimer's disease                                                                  |
| ABCG1 (ATP binding cassette subfamily G member 1)                    | Low physical activity | Positive regulation of amyloid beta formation, cholesterol homeostasis, cholesterol esterification, response to HDL |
| EBF1 (EBF transcription factor 1)                                    | Low physical activity | Regulation of transcription, DNA binding                                                                            |
| CD22 (CD22 molecule)                                                 | Low physical activity | B cell activation, regulation of immune response, negative regulation of calcium signaling                          |
| FRYL (FRY like transcription coactivator)                            | Low physical activity | Neuron projection development, cell morphogenesis                                                                   |
| ANLN (Anilin actin binding protein)                                  | Low physical activity | Cell division, cell projection, cell cycle, hematopoietic cell differentiation                                      |
| SLCO1A2 (Solute carrier organic anion transporter family member 1A2) | Low physical activity | Bile acid and bile salts transport, ALS                                                                             |
| TP53INP2 (Tumor p53 nuclear protein 2)                               | Low physical activity | Autophagosome assembly, protein binding, ubiquitin dependent catabolic process, osteoblast differentiation          |

HDL: high density lipoprotein

ALS: Amyotrophic lateral sclerosis
