# Supplementary material for: Physical Activity Rewires the Human Brain against Neurodegeneration
Source: Int J Mol Sci. 2022 Jun 2;23(11):6223. doi: 10.3390/ijms23116223 (PMC9181322; doi:10.3390/ijms23116223)
Supplement: Supplementary file 1 [file ijms-23-06223-s001.zip]

Archive with 15 entries (15 files):
- Table S1.pdf
- Table S10.xlsx
- Table S11.xlsx
- Table S12.xlsx
- Table S13.xlsx
- Table S14.xlsx
- Table S15.xlsx
- Table S2.xlsx
- Table S3.xlsx
- Table S4.xlsx
- Table S5.pdf
- Table S6.xlsx
- Table S7.xlsx
- Table S8.xlsx
- Table S9.xlsx
