# Supplementary material for: Physical Activity Rewires the Human Brain against Neurodegeneration
Source: Int J Mol Sci. 2022 Jun 2;23(11):6223. doi: 10.3390/ijms23116223 (PMC9181322; doi:10.3390/ijms23116223)
Supplement: Supplementary file 1 [file ijms-23-06223-s001.zip › Table S2.xlsx]

## Sheet: Dataset S1
Table S2. Switch genes identified in GSE110298
Switch genes associated with high physical activity		Switch genes associated with low physical activity
Affy ID	Gene Symbol	Affy ID	Gene Symbol
204036_at	LPAR1	210051_at	RAPGEF3
204204_at	SLC31A2	231015_at	KLF15
222547_at	MAP4K4	221748_s_at	TNS1
213982_s_at	RABGAP1L	230263_s_at	DOCK5
200835_s_at	MAP4	226364_at	HIP1
221868_at	PAIP2B	201346_at	ADIPOR2
240305_at	LOC101930421	1564392_at	LINC00320
243122_at	PACRG-AS3	221884_at	MECOM
		221868_at	PAIP2B
		1565809_x_at	TMEM88B
		226420_at	MECOM
		226055_at	ARRDC2
		1557481_a_at	LINC00320
		226123_at	CHD7
		233317_at	CD9
		232081_at	ABCG1
		227646_at	EBF1
		38521_at	CD22
		1554260_a_at	FRYL
		222608_s_at	ANLN
		211481_at	SLCO1A2
		224836_at	TP53INP2
