# Supplementary material for: Physical Activity Rewires the Human Brain against Neurodegeneration
Source: Int J Mol Sci. 2022 Jun 2;23(11):6223. doi: 10.3390/ijms23116223 (PMC9181322; doi:10.3390/ijms23116223)
Supplement: Supplementary file 1 [file ijms-23-06223-s001.zip › Table S3.xlsx]

## Sheet: Dataset S2
Table S3. Network and pathways analysis of switch genes
High physical activity switch genes						Low physical activity switch genes
Pathways	Total	Expected	Hits	P.Value	FDR	Pathways	Total	Expected	Hits	P.Value	FDR
Telomere Maintenance	72	0.151	4	1.15e-05	0.00858	Antigen Activates B Cell Receptor Leading to Generation of Second Messengers	32	0.12	8	1.1e-13	1.55e-10
Processing of DNA double-strand break ends	3	0.00629	2	1.22e-05	0.00858	Signalling by NGF	290	1.09	12	1.13e-10	7.91e-08
EGFR downregulation	27	0.0566	3	2.08e-05	0.00974	Interleukin-3, 5 and GM-CSF signaling	51	0.191	7	4.28e-10	2e-07
Assembly of the RAD51-ssDNA nucleoprotein complex	5	0.0105	2	4.07e-05	0.0142	Adaptive Immune System	654	2.45	15	8.08e-10	2.83e-07
Homologous DNA pairing and strand exchange	6	0.0126	2	6.1e-05	0.0142	NGF signalling via TRKA from the plasma membrane	207	0.775	10	1.44e-09	4.03e-07
Presynaptic phase of homologous DNA pairing and strand exchange	6	0.0126	2	6.1e-05	0.0142	Regulation of signaling by CBL	22	0.0824	5	1.21e-08	2.84e-06
Meiosis	117	0.245	4	7.83e-05	0.0157	Costimulation by the CD28 family	68	0.255	6	1.36e-07	2.55e-05
Chromosome Maintenance	124	0.26	4	9.82e-05	0.0172	Signaling by Interleukins	116	0.434	7	1.48e-07	2.55e-05
Nuclear Receptor transcription pathway	53	0.111	3	0.000162	0.0252	Signaling by EGFR	179	0.67	8	1.67e-07	2.55e-05
Removal of the Flap Intermediate from the C-strand	10	0.021	2	0.000182	0.0255	Signaling by EGFR in Cancer	181	0.678	8	1.82e-07	2.55e-05
Processive synthesis on the C-strand of the telomere	11	0.0231	2	0.000222	0.0283	Immune System	1140	4.26	16	2.01e-07	2.57e-05
Removal of the Flap Intermediate	14	0.0294	2	0.000366	0.0322	Interleukin-2 signaling	42	0.157	5	3.73e-07	4.08e-05
Signaling by EGFR	179	0.375	4	0.000405	0.0322	Signaling by the B Cell Receptor (BCR)	199	0.745	8	3.79e-07	4.08e-05
Processive synthesis on the lagging strand	15	0.0315	2	0.000422	0.0322	Fcgamma receptor (FCGR) dependent phagocytosis	86	0.322	6	5.57e-07	5.33e-05
Repair synthesis of patch ~27-30 bases long by DNA polymerase	15	0.0315	2	0.000422	0.0322	Signaling by constitutively active EGFR	19	0.0711	4	5.71e-07	5.33e-05
Repair synthesis for gap-filling by DNA polymerase in TC-NER	15	0.0315	2	0.000422	0.0322	Hemostasis	511	1.91	11	7.87e-07	6.89e-05
Signaling by EGFR in Cancer	181	0.38	4	0.000423	0.0322	Disease	945	3.54	14	1.15e-06	9.37e-05
Homologous recombination repair of replication-independent double-strand breaks	16	0.0335	2	0.000482	0.0322	Signal Transduction	1690	6.32	18	1.2e-06	9.37e-05
Homologous Recombination Repair	16	0.0335	2	0.000482	0.0322	Cell surface interactions at the vascular wall	99	0.371	6	1.29e-06	9.49e-05
Gap-filling DNA repair synthesis and ligation in GG-NER	16	0.0335	2	0.000482	0.0322	Signaling by FGFR	162	0.607	7	1.45e-06	0.000101
Gap-filling DNA repair synthesis and ligation in TC-NER	16	0.0335	2	0.000482	0.0322	EGFR downregulation	27	0.101	4	2.53e-06	0.000161
Lagging Strand Synthesis	20	0.0419	2	0.000759	0.0484	Integrin alphaIIb beta3 signaling	27	0.101	4	2.53e-06	0.000161
						Signaling by FGFR in disease	178	0.666	7	2.72e-06	0.000166
						Interleukin receptor SHC signaling	28	0.105	4	2.95e-06	0.000172
						Cytokine Signaling in Immune system	286	1.07	8	5.88e-06	0.00033
						Platelet Aggregation (Plug Formation)	36	0.135	4	8.31e-06	0.000445
						Innate Immune System	521	1.95	10	8.58e-06	0.000445
						Signalling to ERKs	37	0.139	4	9.29e-06	0.000465
						PECAM1 interactions	13	0.0487	3	1.29e-05	0.000626
						DAP12 signaling	164	0.614	6	2.41e-05	0.0011
						Signal attenuation	16	0.0599	3	2.52e-05	0.0011
						Spry regulation of FGF signaling	16	0.0599	3	2.52e-05	0.0011
						Regulation of KIT signaling	17	0.0637	3	3.05e-05	0.00129
						Platelet sensitization by LDL	19	0.0711	3	4.32e-05	0.00174
						DAP12 interactions	182	0.681	6	4.34e-05	0.00174
						Tie2 Signaling	20	0.0749	3	5.07e-05	0.00192
						Signaling by FGFR1 fusion mutants	20	0.0749	3	5.07e-05	0.00192
						CTLA4 inhibitory signaling	24	0.0899	3	8.91e-05	0.00329
						Platelet activation, signaling and aggregation	220	0.824	6	0.000125	0.00448
						Role of phospholipids in phagocytosis	27	0.101	3	0.000128	0.00448
						Signaling by SCF-KIT	142	0.532	5	0.000153	0.00523
						CD28 co-stimulation	30	0.112	3	0.000176	0.00588
						Signaling by FGFR1 mutants	31	0.116	3	0.000195	0.0063
						Downstream signaling of activated FGFR	150	0.562	5	0.000198	0.0063
						GPVI-mediated activation cascade	33	0.124	3	0.000235	0.00732
						Integrin cell surface interactions	85	0.318	4	0.000252	0.00769
						PP2A-mediated dephosphorylation of key metabolic factors	7	0.0262	2	0.000279	0.00816
						Nef Mediated CD8 Down-regulation	7	0.0262	2	0.000279	0.00816
						Downstream signal transduction	163	0.61	5	0.000292	0.00834
						Signaling by ERBB2	164	0.614	5	0.0003	0.00841
						Insulin receptor signalling cascade	95	0.356	4	0.000387	0.0106
						Negative regulation of FGFR signaling	41	0.154	3	0.00045	0.0121
						Nef Mediated CD4 Down-regulation	9	0.0337	2	0.000477	0.0126
						Signaling by PDGF	189	0.708	5	0.000577	0.015
						Signaling by FGFR mutants	45	0.168	3	0.000593	0.0151
						Formation of annular gap junctions	11	0.0412	2	0.000725	0.0178
						MASTL Facilitates Mitotic Progression	11	0.0412	2	0.000725	0.0178
						Signaling by Insulin receptor	117	0.438	4	0.000852	0.0203
						Gap junction degradation	12	0.0449	2	0.000868	0.0203
						ERKs are inactivated	12	0.0449	2	0.000868	0.0203
						Inhibition of replication initiation of damaged DNA by RB1/E2F1	13	0.0487	2	0.00102	0.0231
						Retrograde neurotrophin signalling	13	0.0487	2	0.00102	0.0231
						Nuclear Envelope Reassembly	14	0.0524	2	0.00119	0.0261
						Initiation of Nuclear Envelope Reformation	14	0.0524	2	0.00119	0.0261
						SHC-mediated signalling	15	0.0562	2	0.00137	0.0283
						Beta-catenin phosphorylation cascade	15	0.0562	2	0.00137	0.0283
						SHC1 events in EGFR signaling	15	0.0562	2	0.00137	0.0283
						FCGR activation	15	0.0562	2	0.00137	0.0283
						Regulation of actin dynamics for phagocytic cup formation	62	0.232	3	0.00152	0.0308
						TCR signaling	65	0.243	3	0.00174	0.0348
						Trafficking of GluR2-containing AMPA receptors	17	0.0637	2	0.00177	0.0349
						SHC-related events	18	0.0674	2	0.00199	0.0381
						SHC-related events triggered by IGF1R	18	0.0674	2	0.00199	0.0381
						Signaling by ERBB4	152	0.569	4	0.00225	0.0426
						Prolonged ERK activation events	20	0.0749	2	0.00245	0.0453
						Signal regulatory protein (SIRP) family interactions	20	0.0749	2	0.00245	0.0453
						SHC1 events in ERBB4 signaling	21	0.0786	2	0.00271	0.0486
						ERK/MAPK targets	21	0.0786	2	0.00271	0.0486
						Growth hormone receptor signaling	23	0.0861	2	0.00325	0.0576
						Nef-mediates down modulation of cell surface receptors by recruiting them to clathrin adapters	24	0.0899	2	0.00353	0.0611
						Nuclear Events (kinase and transcription factor activation)	24	0.0899	2	0.00353	0.0611
						SHC1 events in ERBB2 signaling	25	0.0936	2	0.00383	0.0655
						Axon guidance	292	1.09	5	0.00399	0.0674
						Platelet homeostasis	88	0.329	3	0.00413	0.0689
						Constitutive PI3K/AKT Signaling in Cancer	89	0.333	3	0.00426	0.0702
						Signalling to RAS	27	0.101	2	0.00446	0.0727
						SHC-mediated cascade	28	0.105	2	0.00479	0.0772
						Signaling by Type 1 Insulin-like Growth Factor 1 Receptor (IGF1R)	94	0.352	3	0.00497	0.0782
						IGF1R signaling cascade	94	0.352	3	0.00497	0.0782
						DARPP-32 events	29	0.109	2	0.00514	0.08
						Glycolysis	30	0.112	2	0.00549	0.0837
						MAPK targets/ Nuclear events mediated by MAP kinases	30	0.112	2	0.00549	0.0837
						The role of Nef in HIV-1 replication and disease pathogenesis	31	0.116	2	0.00586	0.0864
						Trafficking of AMPA receptors	31	0.116	2	0.00586	0.0864
						Glutamate Binding, Activation of AMPA Receptors and Synaptic Plasticity	31	0.116	2	0.00586	0.0864
						PI3K events in ERBB4 signaling	103	0.386	3	0.00641	0.0898
						PIP3 activates AKT signaling	103	0.386	3	0.00641	0.0898
						PI-3K cascade	103	0.386	3	0.00641	0.0898
						PI3K/AKT Signaling in Cancer	103	0.386	3	0.00641	0.0898
						PI3K events in ERBB2 signaling	103	0.386	3	0.00641	0.0898
						GAB1 signalosome	106	0.397	3	0.00694	0.0954
						PI3K/AKT activation	106	0.397	3	0.00694	0.0954
						E2F mediated regulation of DNA replication	35	0.131	2	0.00743	0.0998
						Signal transduction by L1	35	0.131	2	0.00743	0.0998
						Nef mediated downregulation of CD28 cell surface expression	2	0.00749	1	0.00747	0.0998
