# Supplementary material for: Physical Activity Rewires the Human Brain against Neurodegeneration
Source: Int J Mol Sci. 2022 Jun 2;23(11):6223. doi: 10.3390/ijms23116223 (PMC9181322; doi:10.3390/ijms23116223)
Supplement: Supplementary file 1 [file ijms-23-06223-s001.zip › Table S4.xlsx]

## Sheet: Sheet1
Table S4. Transcription factor analysis of switch genes
Low physical activity switch genes				High physical activity switch genes
Id	Label	Degree	Betweenness	Id	Label	Degree	Betweenness
4899	NRF1	6	130.21	1390	CREM	2	100
466	ATF1	4	72.12	7030	TFE3	2	91.67
2355	FOSL2	4	48.1	7003	TEAD1	2	91.67
5885	RAD21	4	26.74	51157	ZNF580	2	91.67
7023	TFAP4	4	28.93	1997	ELF1	2	91.67
10168	ZNF197	4	34.01	1316	KLF6	2	91.67
51157	ZNF580	4	99.99	4798	NFRKB	2	91.67
51341	ZBTB7A	4	35.76
467	ATF3	3	33.72
604	BCL6	3	20.19
2101	ESRRA	3	28.38
3068	HDGF	3	57.18
3659	IRF1	3	11.97
7025	NR2F1	3	17.07
10661	KLF1	3	35.44
23512	SUZ12	3	24.43
57684	ZBTB26	3	11.53
58491	ZNF71	3	14.82
80108	ZFP2	3	21.92
1054	CEBPG	2	10.05
1488	CTBP2	2	17.18
1875	E2F5	2	7.92
3726	JUNB	2	10.95
5989	RFX1	2	11.04
6945	MLX	2	25.53
7913	DEK	2	10.55
8328	GFI1B	2	30.93
8609	KLF7	2	4.5
8726	EED	2	20.58
8805	TRIM24	2	15.49
9314	KLF4	2	8.72
55145	THAP1	2	7.36
115560	ZNF501	2	6.99
148156	ZNF558	2	13.55
