# Supplementary material for: Physical Activity Rewires the Human Brain against Neurodegeneration
Source: Int J Mol Sci. 2022 Jun 2;23(11):6223. doi: 10.3390/ijms23116223 (PMC9181322; doi:10.3390/ijms23116223)
Supplement: Supplementary file 1 [file ijms-23-06223-s001.zip › Table S6.xlsx]

## Sheet: Sheet1
Table S6. Differential gene expression analysis of subjects who underwent high and moderate physical activity compared to low physical activity.
Bioset 1: Hippocampi from 76-99yr old female subjects with high physical activity levels _vs_ low (Study: Hippocampi from post-mortem brains of subjects with low, moderate, or high physical activity levels)
Bioset 2: Hippocampi from 76-99yr old female subjects with moderate physical activity levels _vs_ low (Study: Hippocampi from post-mortem brains of subjects with low, moderate, or high physical activity levels)
Bioset 3: Hippocampi from 78-101yr old male subjects with high physical activity levels _vs_ low (Study: Hippocampi from post-mortem brains of subjects with low, moderate, or high physical activity levels)
Bioset 4: Hippocampi from 78-101yr old male subjects with moderate physical activity levels _vs_ low (Study: Hippocampi from post-mortem brains of subjects with low, moderate, or high physical activity levels)
Gene	EntrezGene ID	Gene Description	Specificity	Overall Gene score	Score Bioset 1	p-value Bioset 1	activity type Bioset 1	activity value Bioset 1	Score Bioset 2	p-value Bioset 2	activity type Bioset 2	activity value Bioset 2	Score Bioset 3	p-value Bioset 3	activity type Bioset 3	activity value Bioset 3	Score Bioset 4	p-value Bioset 4	activity type Bioset 4	activity value Bioset 4
APBB2	323	amyloid beta (A4) precursor protein-binding, family B, member 2	4 out of 4	250.064	47.7874	0.0004	fold change	-1.22	63.1257	0.0046	fold change	-1.25	69.5952	0.0142	fold change	-1.56	69.5555	0.0352	fold change	-1.36
PDLIM5	10611	PDZ and LIM domain 5	4 out of 4	249.025	53.161	0.0348	fold change	-1.25	75.6327	0.0019	fold change	1.31	46.5038	0.0159	fold change	1.31	73.7278	0.0174	fold change	1.41
GPR37	2861	G protein-coupled receptor 37 (endothelin receptor type B-like)	3 out of 4	284.428					94.7562	0.0484	fold change	1.52	96.8467	0.0106	fold change	-2.38	92.8247	0.0153	fold change	-2
DOCK5	80005	dedicator of cytokinesis 5	3 out of 4	274.99	85.6458	0.0262	fold change	-1.52					97.0761	0.0007	fold change	-2.41	92.2679	0.0153	fold change	-1.95
HLA-DPB1	3115	major histocompatibility complex, class II, DP beta 1	3 out of 4	264.067					70.1115	0.0048	fold change	1.28	94.6844	0.0193	fold change	-2.15	99.2713	0.0268	fold change	-3.44
HHIP	64399	hedgehog interacting protein	3 out of 4	261.456					77.541	0.0321	fold change	1.32	93.7453	0.0051	fold change	-2.11	90.1697	0.0076	fold change	-1.82
RNF130	55819	ring finger protein 130	3 out of 4	259.526	77.201	0.0187	fold change	1.42					93.4597	0.0117	fold change	-2.1	88.8652	0.0229	fold change	-1.77
MAGEE2	139599	melanoma antigen family E, 2	3 out of 4	257.303	84.468	0.0095	fold change	1.5					82.9297	0.0048	fold change	1.79	89.9054	0.0235	fold change	1.81
Hs.650614	NA		3 out of 4	253.929	77.201	0.0469	fold change	-1.42					97.0761	0.0096	fold change	-2.41	79.6521	0.0277	fold change	-1.51
SLC44A1	23446	solute carrier family 44, member 1	3 out of 4	251.946	70.031	0.0404	fold change	-1.36					92.3361	0.0158	fold change	-2.05	89.5784	0.0103	fold change	-1.8
FRYL	285527	FRY-like	3 out of 4	249.318					98.2415	0.0119	fold change	1.7	79.9105	0.0003	fold change	-1.73	71.1663	0.0062	fold change	-1.38
CTNNA1	1495	catenin (cadherin-associated protein), alpha 1, 102kDa	3 out of 4	247.411					95.1239	0.0378	fold change	1.53	71.7484	0.0225	fold change	-1.59	80.5386	0.0259	fold change	-1.53
PDE4DIP	9659	phosphodiesterase 4D interacting protein	3 out of 4	246.663	70.031	0.0458	fold change	1.36					85.5271	0.0429	fold change	-1.84	91.1046	0.0252	fold change	-1.87
HNRNPDL	9987	heterogeneous nuclear ribonucleoprotein D-like	3 out of 4	243.648					87.0413	0.0275	fold change	1.39	73.1133	0.0016	fold change	-1.61	83.4934	0.0278	fold change	-1.59
CD84	8832	CD84 molecule	3 out of 4	240.154					58.0026	0.0443	fold change	1.23	87.9755	0.0117	fold change	-1.9	94.1761	0.0111	fold change	-2.16
HAUS6	54801	HAUS augmin-like complex, subunit 6	3 out of 4	238.039					77.541	0.0099	fold change	1.32	70.92	0.0203	fold change	-1.58	89.5784	0.0346	fold change	-1.8
AW002876	NA		3 out of 4	234.597	78.2828	0.0404	fold change	1.43	92.8954	0.027	fold change	1.47	63.4188	0.0057	fold change	1.48
QKI	9444	QKI, KH domain containing, RNA binding	3 out of 4	233.662	51.6204	0.0017	fold change	-1.24					86.9172	0.023	fold change	-1.87	95.1239	0.0345	fold change	-2.25
DRAM2	128338	DNA-damage regulated autophagy modulator 2	3 out of 4	233.489					72.1272	0.026	fold change	1.29	69.1639	0.0018	fold change	-1.55	92.1982	0.0123	fold change	-1.94
AKAP5	9495	A kinase (PRKA) anchor protein 5	3 out of 4	229.237	89.447	0.0363	fold change	1.59					68.6238	0.0369	fold change	1.54	71.1663	0.0176	fold change	1.38
FAM76B	143684	family with sequence similarity 76, member B	3 out of 4	226.718					94.7562	0.0117	fold change	1.52	56.9282	0.0094	fold change	-1.41	75.0334	0.0281	fold change	-1.43
CAT	847	catalase	3 out of 4	226.053					73.9941	0.0337	fold change	1.3	64.147	0.025	fold change	-1.49	87.9121	0.0238	fold change	-1.73
ENTPD1	953	ectonucleoside triphosphate diphosphohydrolase 1	3 out of 4	225.77					70.1115	0.0485	fold change	1.28	64.147	0.006	fold change	-1.49	91.5114	0.0124	fold change	-1.89
PQLC3	130814	PQ loop repeat containing 3	3 out of 4	225.222					84.6439	0.0046	fold change	1.37	58.8069	0.01	fold change	-1.43	81.7715	0.0331	fold change	-1.55
KIF13B	23303	kinesin family member 13B	3 out of 4	223.99	67.4191	0.0477	fold change	-1.34					77.7871	0.0004	fold change	-1.69	78.7836	0.0042	fold change	-1.49
FAM184A	79632	family with sequence similarity 184, member A	3 out of 4	222.661	59.3465	0.0129	fold change	1.29					77.7871	0.0066	fold change	1.69	85.5271	0.0486	fold change	1.65
GLIPR1	11010	GLI pathogenesis-related 1	3 out of 4	219.615					96.695	0.0425	fold change	1.6	41.1485	0.0429	fold change	-1.26	81.7715	0.02	fold change	-1.55
RPL22L1	200916	ribosomal protein L22-like 1	3 out of 4	218.414	64.2145	0.0445	fold change	1.32	84.6439	0.0294	fold change	1.37					69.5555	0.0222	fold change	-1.36
ATP5S	27109	ATP synthase, H+ transporting, mitochondrial Fo complex, subunit s (factor B)	3 out of 4	217.618	68.5091	0.0292	fold change	1.35	90.3016	0.0265	fold change	1.43	58.8069	0.0006	fold change	1.43
HNRNPD	3184	heterogeneous nuclear ribonucleoprotein D (AU-rich element RNA binding protein 1, 37kDa)	3 out of 4	217.495	64.2145	0.0156	fold change	1.32	67.7534	0.0261	fold change	1.27	85.5271	0.0172	fold change	-1.84
DIP2B	57609	DIP2 disco-interacting protein 2 homolog B (Drosophila)	3 out of 4	217.094	59.3465	0.0055	fold change	-1.29					79.9105	0.0011	fold change	-1.73	77.8368	0.0297	fold change	-1.47
DENND1B	163486	DENN/MADD domain containing 1B	3 out of 4	215.527	67.4191	0.0273	fold change	1.34					70.2711	0.005	fold change	1.57	77.8368	0.0252	fold change	1.47
USP48	84196	ubiquitin specific peptidase 48	3 out of 4	215.405					77.541	0.0255	fold change	1.32	69.1639	0.0342	fold change	-1.55	68.7002	0.0125	fold change	-1.35
MTFR1	9650	mitochondrial fission regulator 1	3 out of 4	213.037					83.2113	0.0394	fold change	1.36	51.0418	0.0461	fold change	-1.35	78.7836	0.0325	fold change	-1.49
SLC1A4	6509	solute carrier family 1 (glutamate/neutral amino acid transporter), member 4	3 out of 4	210.396	58.1125	0.0398	fold change	1.28	88.8652	0.0122	fold change	1.41	63.4188	0.0172	fold change	1.48
MND1	84057	meiotic nuclear divisions 1 homolog (S. cerevisiae)	3 out of 4	210.289					77.541	0.0436	fold change	1.32	56.9282	0.0165	fold change	-1.41	75.8196	0.0356	fold change	-1.44
TBXAS1	6916	thromboxane A synthase 1 (platelet)	3 out of 4	208.849	55.3636	0.007	fold change	-1.26					61.7002	0.0431	fold change	-1.46	91.7852	0.0207	fold change	-1.92
MAP4K4	9448	mitogen-activated protein kinase kinase kinase kinase 4	3 out of 4	206.729	55.3636	0.0342	fold change	-1.26					78.3822	0.0078	fold change	-1.7	72.9831	0.044	fold change	-1.4
CREBZF	58487	CREB/ATF bZIP transcription factor	3 out of 4	206.471	72.4669	0.0222	fold change	1.38	81.88	0.0375	fold change	1.35	52.1241	0.005	fold change	-1.36
SFR1	119392	SWI5-dependent recombination repair 1	3 out of 4	205.862					96.3911	0.007	fold change	1.59	49.9226	0.0433	fold change	-1.34	59.5479	0.0297	fold change	-1.26
RNF150	57484	ring finger protein 150	3 out of 4	205.574	67.4191	0.042	fold change	1.34					67.6416	0.0274	fold change	1.53	70.5129	0.0148	fold change	1.37
CARMIL1	55604	leucine rich repeat containing 16A	3 out of 4	204.856					88.8652	0.0216	fold change	1.41	62.3893	0.0486	fold change	1.47	53.6015	0.0274	fold change	1.2
BEST1	7439	bestrophin 1	3 out of 4	202.403	49.9022	0.0282	fold change	-1.23					75.4933	0.0026	fold change	-1.65	77.0072	0.0229	fold change	-1.46
ME1	4199	malic enzyme 1, NADP(+)-dependent, cytosolic	3 out of 4	198.287					52.3681	0.0134	fold change	1.21	64.147	0.0112	fold change	1.49	81.7715	0.0204	fold change	1.55
NSMCE4A	54780	non-SMC element 4 homolog A (S. cerevisiae)	3 out of 4	196.5					75.6327	0.0229	fold change	1.31	48.9093	0.0429	fold change	-1.33	71.958	0.0336	fold change	-1.39
RABGEF1	27342	RAB guanine nucleotide exchange factor (GEF) 1	3 out of 4	196.043	59.3465	0.0043	fold change	1.29					62.3893	0.0213	fold change	1.47	74.3075	0.0266	fold change	-1.42
OTUD7B	56957	OTU domain containing 7B	3 out of 4	191.938	56.5611	0.0211	fold change	-1.27					63.4188	0.0139	fold change	-1.48	71.958	0.0232	fold change	-1.39
SLC35D2	11046	solute carrier family 35, member D2	3 out of 4	191.814	47.7874	0.0281	fold change	-1.22					67.6416	0.0068	fold change	-1.53	76.3849	0.0208	fold change	-1.45
PTK2	5747	PTK2 protein tyrosine kinase 2	3 out of 4	188.25					80.4868	0.0142	fold change	1.34	52.1241	0.026	fold change	-1.36	55.6396	0.0174	fold change	-1.22
DICER1	23405	dicer 1, ribonuclease type III	3 out of 4	186.303					75.6327	0.0085	fold change	1.31	53.9782	0.005	fold change	-1.38	56.6919	0.01	fold change	-1.23
S100A6	6277	S100 calcium binding protein A6	3 out of 4	184.719	49.9022	0.014	fold change	-1.23	55.1651	0.0174	fold change	-1.22					79.6521	0.0126	fold change	-1.51
ZNF711	7552	zinc finger protein 711	3 out of 4	183.274	58.1125	0.0334	fold change	1.28	77.541	0.0344	fold change	1.32	47.6209	0.0036	fold change	1.32
RIN2	54453	Ras and Rab interactor 2	3 out of 4	182.155	71.4143	0.0478	fold change	-1.37					53.0921	0.011	fold change	-1.37	57.6488	0.0234	fold change	-1.24
SLCO3A1	28232	solute carrier organic anion transporter family, member 3A1	3 out of 4	181.768	55.3636	0.0057	fold change	-1.26					47.6209	0.0291	fold change	-1.32	78.7836	0.03	fold change	-1.49
ABCC4	10257	ATP-binding cassette, sub-family C (CFTR/MRP), member 4	3 out of 4	180.752	58.1125	0.0132	fold change	-1.28	52.3681	0.0192	fold change	1.21	70.2711	0.0176	fold change	-1.57
SHROOM1	134549	shroom family member 1	3 out of 4	179.558					52.3681	0.026	fold change	-1.21	67.6416	0.0016	fold change	-1.53	59.5479	0.0356	fold change	-1.26
GPR180	160897	G protein-coupled receptor 180	3 out of 4	175.515	80.4337	0.0437	fold change	1.45					36.3859	0.035	fold change	1.21	58.6951	0.0432	fold change	1.25
SRSF4	6429	serine/arginine-rich splicing factor 4	3 out of 4	174.666					60.6951	0.041	fold change	1.24	45.2706	0.0004	fold change	-1.3	68.7002	0.0013	fold change	-1.35
ABTB2	25841	ankyrin repeat and BTB (POZ) domain containing 2	3 out of 4	174.638	73.7278	0.0041	fold change	-1.39					45.2706	0.0108	fold change	-1.3	55.6396	0.0133	fold change	-1.22
KDM5B	10765	lysine (K)-specific demethylase 5B	3 out of 4	174.487	47.7874	0.0191	fold change	1.22					59.7215	0.0219	fold change	1.44	66.9783	0.0085	fold change	1.33
NBR2	10230	neighbor of BRCA1 gene 2 (non-protein coding)	3 out of 4	174.458					58.0026	0.0257	fold change	-1.23	58.8069	0.0138	fold change	-1.43	57.6488	0.0499	fold change	-1.24
CENPC	1060	centromere protein C 1	3 out of 4	173.744	72.4669	0.0074	fold change	1.38	52.3681	0.0375	fold change	1.21	48.9093	0.0313	fold change	-1.33
PAPD4	167153	PAP associated domain containing 4	3 out of 4	171.856					78.8345	0.0016	fold change	1.33	37.3818	0.0235	fold change	-1.22	55.6396	0.0434	fold change	-1.22
METTL6	131965	methyltransferase like 6	3 out of 4	170.346	42.8706	0.0214	fold change	1.2	67.7534	0.0022	fold change	1.27	59.7215	0.0231	fold change	1.44
ING2	3622	inhibitor of growth family, member 2	3 out of 4	169.587	55.3636	0.03	fold change	1.26	52.3681	0.0312	fold change	1.21					61.8552	0.0004	fold change	-1.28
GTF2H5	404672	general transcription factor IIH, polypeptide 5	3 out of 4	168.62	58.1125	0.0109	fold change	1.28	65.2367	0.0299	fold change	1.26	45.2706	0.0469	fold change	1.3
PAXIP1-AS1	202781	uncharacterized LOC202781	3 out of 4	165.844	67.4191	0.0008	fold change	1.34	63.1257	0.0401	fold change	1.25	35.2993	0.0383	fold change	-1.2
RNF180	285671	ring finger protein 180	3 out of 4	164.436	71.4143	0.0081	fold change	1.37					37.3818	0.045	fold change	1.22	55.6396	0.0076	fold change	1.22
CEP57	9702	centrosomal protein 57kDa	3 out of 4	163.861	62.6111	0.0222	fold change	1.31	58.0026	0.0147	fold change	1.23	43.2477	0.0039	fold change	1.28
TALDO1	6888	transaldolase 1	3 out of 4	163.309					58.0026	0.02	fold change	1.23	40.3119	0.0389	fold change	-1.25	64.995	0.0123	fold change	-1.31
HDGFL3	50810	hepatoma-derived growth factor, related protein 3	3 out of 4	162.969	59.3465	0.0255	fold change	1.29	65.2367	0.0292	fold change	1.26	38.3859	0.0243	fold change	1.23
MFSD12	126321	major facilitator superfamily domain containing 12	3 out of 4	161.436	51.6204	0.0376	fold change	-1.24	55.1651	0.0394	fold change	-1.22					54.6502	0.0487	fold change	-1.21
NUP107	57122	nucleoporin 107kDa	3 out of 4	161.392					58.0026	0.0058	fold change	1.23	37.3818	0.0157	fold change	-1.22	66.0075	0.0431	fold change	-1.32
AGFG1	3267	ArfGAP with FG repeats 1	3 out of 4	160.264					55.1651	0.0174	fold change	1.22	37.3818	0.0465	fold change	1.22	67.7167	0.0493	fold change	-1.34
DLL3	10683	delta-like 3 (Drosophila)	3 out of 4	155.337	55.3636	0.0155	fold change	1.26					39.2188	0.0028	fold change	-1.24	60.7548	0.0212	fold change	-1.27
MRPL35	51318	mitochondrial ribosomal protein L35	3 out of 4	155.334	58.1125	0.0004	fold change	1.28	58.0026	0.0147	fold change	1.23	39.2188	0.0434	fold change	1.24
TCF3	6929	transcription factor 3 (E2A immunoglobulin enhancer binding factors E12/E47)	3 out of 4	153.447	45.4046	0.0027	fold change	-1.21					45.2706	0.0201	fold change	-1.3	62.7715	0.0476	fold change	-1.29
CNOT2	4848	CCR4-NOT transcription complex, subunit 2	3 out of 4	153.302					55.1651	0.0316	fold change	-1.22	37.3818	0.0189	fold change	-1.22	60.7548	0.0143	fold change	-1.27
KLHDC9	126823	kelch domain containing 9	3 out of 4	153.283	49.9022	0.0314	fold change	1.23					38.3859	0.0008	fold change	1.23	64.995	0.0038	fold change	1.31
SCYL2	55681	SCY1-like 2 (S. cerevisiae)	3 out of 4	152.312	53.161	0.0274	fold change	1.25	58.0026	0.0319	fold change	1.23	41.1485	0.0151	fold change	1.26
LMBR1	64327	limb region 1 homolog (mouse)	3 out of 4	151.361	51.6204	0.0468	fold change	1.24					44.1014	0.0069	fold change	1.29	55.6396	0.0062	fold change	-1.22
ALG13	79868	asparagine-linked glycosylation 13 homolog (S. cerevisiae)	3 out of 4	150.143	49.9022	0.0113	fold change	-1.23					38.3859	0.0485	fold change	-1.23	61.8552	0.0138	fold change	-1.28
RHBDD3	25807	rhomboid domain containing 3	3 out of 4	149.889	42.8706	0.0287	fold change	-1.2	52.3681	0.0177	fold change	-1.21					54.6502	0.0448	fold change	1.21
AQP4-AS1	147429	AQP4 antisense RNA 1	2 out of 4	199.351	99.4332	0.0066	fold change	2.27	99.9181	0.0032	fold change	2.54
CRNDE	643911	colorectal neoplasia differentially expressed (non-protein coding)	2 out of 4	199.269									99.6751	0.0086	fold change	-3.61	99.5937	0.0497	fold change	-3.9
HLA-DRA	3122	major histocompatibility complex, class II, DR alpha	2 out of 4	199.107									99.3522	0.0135	fold change	-2.96	99.7546	0.0196	fold change	-4.83
MYH11	4629	myosin, heavy chain 11, smooth muscle	2 out of 4	198.786									99.5937	0.0004	fold change	-3.51	99.1926	0.0135	fold change	-3.41
LAPTM5	7805	lysosomal protein transmembrane 5	2 out of 4	198.705									99.1926	0.0286	fold change	-2.88	99.5124	0.0183	fold change	-3.86
KLF4	9314	Kruppel-like factor 4 (gut)	2 out of 4	196.643									98.7147	0.0251	fold change	-2.62	97.9278	0.0217	fold change	-2.83
ALOX5AP	241	arachidonate 5-lipoxygenase-activating protein	2 out of 4	196.494									97.4621	0.0149	fold change	-2.45	99.0315	0.0333	fold change	-3.15
TF	7018	transferrin	2 out of 4	196.419									99.112	0.002	fold change	-2.87	97.3066	0.0305	fold change	-2.64
EVI2B	2124	ecotropic viral integration site 2B	2 out of 4	196.325									98.2415	0.0108	fold change	-2.56	98.0834	0.0144	fold change	-2.92
HLA-DPA1	3113	major histocompatibility complex, class II, DP alpha 1	2 out of 4	195.503									96.3911	0.0187	fold change	-2.33	99.112	0.0371	fold change	-3.33
LGR5	8549	leucine-rich repeat containing G protein-coupled receptor 5	2 out of 4	195.303									99.5124	0.0073	fold change	-3.09	95.7909	0.0366	fold change	-2.31
RGS10	6001	regulator of G-protein signaling 10	2 out of 4	195.023									96.4674	0.0229	fold change	-2.34	98.5552	0.0171	fold change	-3.05
C9orf72	203228	chromosome 9 open reading frame 72	2 out of 4	194.46	97.0761	0.013	fold change	1.85	97.3843	0.0216	fold change	1.64
RNASE2	6036	ribonuclease, RNase A family, 2 (liver, eosinophil-derived neurotoxin)	2 out of 4	193.852									97.3843	0.0045	fold change	-2.44	96.4674	0.0153	fold change	-2.42
HLA-DRB1	3123	major histocompatibility complex, class II, DR beta 1	2 out of 4	193.596									95.1982	0.0051	fold change	-2.19	98.3981	0.0246	fold change	-3.01
PACRG-AS3	729658	uncharacterized LOC729658	2 out of 4	193.564	95.7909	0.0075	fold change	-1.79					97.7727	0.0069	fold change	-2.52
CTSS	1520	cathepsin S	2 out of 4	193.399									94.6844	0.0121	fold change	-2.15	98.7147	0.0217	fold change	-3.09
CLCA4	22802	chloride channel accessory 4	2 out of 4	193.222									98.3187	0.0038	fold change	-2.57	94.9037	0.03	fold change	-2.24
CNTN2	6900	contactin 2 (axonal)	2 out of 4	192.987									98.0834	0.0034	fold change	-2.54	94.9037	0.0254	fold change	-2.24
FCGR3B	2215	Fc fragment of IgG, low affinity IIIb, receptor (CD16b)	2 out of 4	192.825									94.9758	0.0218	fold change	-2.17	97.8493	0.0136	fold change	-2.8
LAMP2	3920	lysosomal-associated membrane protein 2	2 out of 4	192.796									97.1534	0.034	fold change	-2.43	95.6425	0.0361	fold change	-2.3
OLR1	4973	oxidized low density lipoprotein (lectin-like) receptor 1	2 out of 4	192.638									95.7909	0.0294	fold change	-2.23	96.8467	0.0384	fold change	-2.54
MS4A14	84689	membrane-spanning 4-domains, subfamily A, member 14	2 out of 4	192.414									95.5676	0.0141	fold change	-2.22	96.8467	0.0186	fold change	-2.54
HAVCR2	84868	hepatitis A virus cellular receptor 2	2 out of 4	192.343									95.4198	0.0011	fold change	-2.21	96.9236	0.0017	fold change	-2.55
DOCK2	1794	dedicator of cytokinesis 2	2 out of 4	192.166									94.3931	0.0364	fold change	-2.14	97.7727	0.0113	fold change	-2.73
TMEM144	55314	transmembrane protein 144	2 out of 4	192.116									98.0834	0.0028	fold change	-2.54	94.0327	0.02	fold change	-2.13
LPAR5	57121	lysophosphatidic acid receptor 5	2 out of 4	190.289									93.7453	0.0038	fold change	-2.11	96.5437	0.0129	fold change	-2.46
ITGB2	3689	integrin, beta 2 (complement component 3 receptor 3 and 4 subunit)	2 out of 4	189.516									91.0382	0.0048	fold change	-2	98.4775	0.0051	fold change	-3.04
RNASE6	6039	ribonuclease, RNase A family, k6	2 out of 4	188.667									93.247	0.0078	fold change	-2.09	95.4198	0.0146	fold change	-2.28
CLMN	79789	calmin (calponin-like, transmembrane)	2 out of 4	188.366									94.9758	0.002	fold change	-2.17	93.3899	0.0432	fold change	-2.06
HLA-DRB5	3127	major histocompatibility complex, class II, DR beta 5	2 out of 4	188.134									89.9717	0.0045	fold change	-1.96	98.1624	0.0226	fold change	-2.93
TLR3	7098	toll-like receptor 3	2 out of 4	188.046					97.0761	0.0256	fold change	1.61					90.9703	0.0293	fold change	-1.86
S100A4	6275	S100 calcium binding protein A4	2 out of 4	187.706									94.0327	0.0013	fold change	-2.13	93.6733	0.0355	fold change	-2.09
Hs.656129	NA		2 out of 4	187.608	97.3066	0.0008	fold change	-1.87	90.3016	0.0324	fold change	-1.43
LY86	9450	lymphocyte antigen 86	2 out of 4	187.608									90.3016	0.0033	fold change	-1.97	97.3066	0.0088	fold change	-2.64
ANLN	54443	anillin, actin binding protein	2 out of 4	187.456									98.3981	0.0221	fold change	-2.58	89.0583	0.0497	fold change	-1.78
ZNF846	162993	zinc finger protein 846	2 out of 4	187.263	90.5682	0.0054	fold change	1.62	96.695	0.0013	fold change	1.6
ADORA3	140	adenosine A3 receptor	2 out of 4	187.203									91.0382	0.0446	fold change	-2	96.1649	0.0455	fold change	-2.38
RNASET2	8635	ribonuclease T2	2 out of 4	187.063									89.447	0.0069	fold change	-1.94	97.6162	0.0162	fold change	-2.72
SPP1	6696	secreted phosphoprotein 1	2 out of 4	186.637									93.247	0.0307	fold change	-2.09	93.3899	0.0449	fold change	-2.06
SAMSN1	64092	SAM domain, SH3 domain and nuclear localization signals 1	2 out of 4	186.542									90.3016	0.0247	fold change	-1.97	96.2408	0.0307	fold change	-2.39
MOBP	4336	myelin-associated oligodendrocyte basic protein	2 out of 4	185.131	94.8299	0.034	fold change	-1.72					90.3016	0.047	fold change	-1.97
HLA-DQB1	3119	major histocompatibility complex, class II, DQ beta 1	2 out of 4	184.839									98.9531	0.0453	fold change	-2.71	85.8856	0.026	fold change	-1.66
C3AR1	719	complement component 3a receptor 1	2 out of 4	184.69									86.9172	0.0212	fold change	-1.87	97.7727	0.0144	fold change	-2.73
SLC38A2	54407	solute carrier family 38, member 2	2 out of 4	184.51									90.8364	9.5e-05	fold change	-1.99	93.6733	0.0028	fold change	-2.09
GATC	283459	glutamyl-tRNA(Gln) amidotransferase, subunit C homolog (bacterial)	2 out of 4	184.379									86.9172	0.0232	fold change	-1.87	97.4621	0.0092	fold change	-2.71
HLA-DMB	3109	major histocompatibility complex, class II, DM beta	2 out of 4	183.918									86.9172	0.0347	fold change	-1.87	97.0007	0.0217	fold change	-2.57
LIPA	3988	lipase A, lysosomal acid, cholesterol esterase	2 out of 4	183.748									90.501	0.0022	fold change	-1.98	93.247	0.0154	fold change	-2.05
ITGA2	3673	integrin, alpha 2 (CD49B, alpha 2 subunit of VLA-2 receptor)	2 out of 4	183.515									95.7909	0.0015	fold change	-2.23	87.7239	0.0182	fold change	-1.72
MS4A4A	51338	membrane-spanning 4-domains, subfamily A, member 4A	2 out of 4	183.008									86.9172	0.0096	fold change	-1.87	96.091	0.0005	fold change	-2.34
FDFT1	2222	farnesyl-diphosphate farnesyltransferase 1	2 out of 4	182.857									86.9172	0.0019	fold change	-1.87	95.9398	0.0041	fold change	-2.32
CD74	972	CD74 molecule, major histocompatibility complex, class II invariant chain	2 out of 4	182.5									90.3016	0.0075	fold change	-1.97	92.1982	0.0192	fold change	-1.94
P2RX7	5027	purinergic receptor P2X, ligand-gated ion channel, 7	2 out of 4	182.49									93.8174	0.0031	fold change	-2.12	88.6729	0.0149	fold change	-1.76
CARD8-AS1	100505812	uncharacterized LOC100505812	2 out of 4	182.411									88.7374	0.0482	fold change	-1.92	93.6733	0.0157	fold change	-2.09
CYBB	1536	cytochrome b-245, beta polypeptide	2 out of 4	182.32									84.9358	0.0159	fold change	-1.83	97.3843	0.0255	fold change	-2.7
PSMB8-AS1	100507463	uncharacterized LOC100507463	2 out of 4	181.984									88.7374	0.0009	fold change	-1.92	93.247	0.017	fold change	-2.05
PRIMA1	145270	proline rich membrane anchor 1	2 out of 4	181.831									92.9662	0.0013	fold change	-2.08	88.8652	0.0127	fold change	-1.77
ZWILCH	55055	Zwilch, kinetochore associated, homolog (Drosophila)	2 out of 4	181.236	84.995	0.0277	fold change	1.51	96.2408	0.0205	fold change	1.57
PIP4K2A	5305	phosphatidylinositol-5-phosphate 4-kinase, type II, alpha	2 out of 4	181.159									93.247	0.0182	fold change	-2.09	87.9121	0.045	fold change	-1.73
BC037932	NA		2 out of 4	180.431									89.1234	0.0021	fold change	-1.93	91.3075	0.0277	fold change	-1.88
WASIR2	100132169	WASH and IL9R antisense RNA 2	2 out of 4	180.099					85.706	0.0329	fold change	-1.38					94.3931	0.0413	fold change	-2.18
MAN2A1	4124	mannosidase, alpha, class 2A, member 1	2 out of 4	179.92									94.3931	0.0013	fold change	-2.14	85.5271	0.0359	fold change	-1.65
CLDN11	5010	claudin 11	2 out of 4	179.918									92.7541	0.0035	fold change	-2.07	87.1642	0.0297	fold change	-1.7
CD53	963	CD53 molecule	2 out of 4	179.839									84.9358	0.0095	fold change	-1.83	94.9037	0.0121	fold change	-2.24
APBB1IP	54518	amyloid beta (A4) precursor protein-binding, family B, member 1 interacting protein	2 out of 4	179.255									83.8349	0.0061	fold change	-1.81	95.4198	0.0435	fold change	-2.28
DEPDC7	91614	DEP domain containing 7	2 out of 4	178.376					90.9025	0.0398	fold change	1.44					87.4738	0.0119	fold change	-1.71
TMEM63A	9725	transmembrane protein 63A	2 out of 4	177.886									94.3931	0.0239	fold change	-2.14	83.4934	0.0246	fold change	-1.59
NPC1	4864	Niemann-Pick disease, type C1	2 out of 4	177.881									87.9755	0.0071	fold change	-1.9	89.9054	0.0262	fold change	-1.81
EVI2A	2123	ecotropic viral integration site 2A	2 out of 4	177.588									92.4761	0.0252	fold change	-2.06	85.1122	0.0412	fold change	-1.64
RPRML	388394	reprimo-like	2 out of 4	177.017									92.1982	0.0119	fold change	2.04	84.8191	0.0284	fold change	1.63
GABRB1	2560	gamma-aminobutyric acid (GABA) A receptor, beta 1	2 out of 4	176.991									87.4126	0.0007	fold change	1.89	89.5784	0.0123	fold change	1.8
NINJ2	4815	ninjurin 2	2 out of 4	176.991									87.4126	0.0238	fold change	-1.89	89.5784	0.0434	fold change	-1.8
MTUS1	57509	microtubule associated tumor suppressor 1	2 out of 4	176.823									86.9172	0.0001	fold change	-1.87	89.9054	0.0271	fold change	-1.81
AL833045	NA		2 out of 4	176.268									81.0701	0.0192	fold change	1.75	95.1982	0.0159	fold change	2.26
C10orf90	118611	chromosome 10 open reading frame 90	2 out of 4	176.241									94.0327	0.0087	fold change	-2.13	82.2084	0.0239	fold change	-1.56
C3	718	complement component 3	2 out of 4	176.106									77.7871	0.0032	fold change	-1.69	98.3187	0.0301	fold change	-2.96
AI076706	NA		2 out of 4	175.409					83.2113	0.0369	fold change	-1.36					92.1982	0.0317	fold change	1.94
NFASC	23114	neurofascin	2 out of 4	175.333									89.447	0.0016	fold change	-1.94	85.8856	0.0141	fold change	-1.66
RFC3	5983	replication factor C (activator 1) 3, 38kDa	2 out of 4	175.135	79.3437	0.0199	fold change	1.44	95.7909	0.0038	fold change	1.55
CD22	933	CD22 molecule	2 out of 4	174.791									89.9717	0.0006	fold change	-1.96	84.8191	0.005	fold change	-1.63
NDE1	54820	nudE nuclear distribution E homolog 1 (A. nidulans)	2 out of 4	174.576									87.1019	0.013	fold change	-1.88	87.4738	0.021	fold change	-1.71
1556216_s_at	NA		2 out of 4	174.508	84.995	0.0381	fold change	1.51					89.5127	0.0092	fold change	1.95
GAB1	2549	GRB2-associated binding protein 1	2 out of 4	174.3									91.6489	0.0039	fold change	-2.03	82.6515	0.0392	fold change	-1.57
RHNO1	83695	RAD9-HUS1-RAD1 interacting nuclear orphan 1	2 out of 4	174.251	80.4337	0.036	fold change	1.45	93.8174	0.0029	fold change	1.49
ATP8B4	79895	ATPase, class I, type 8B, member 4	2 out of 4	174.021					87.0413	0.0423	fold change	1.39					86.9792	0.0441	fold change	-1.69
ARHGAP9	64333	Rho GTPase activating protein 9	2 out of 4	173.685									81.0701	0.0005	fold change	-1.75	92.6149	0.0449	fold change	-1.97
SPOCK3	50859	sparc/osteonectin, cwcv and kazal-like domains proteoglycan (testican) 3	2 out of 4	173.496					98.5552	0.0348	fold change	1.72	74.9412	0.026	fold change	-1.64
TTYH2	94015	tweety homolog 2 (Drosophila)	2 out of 4	173.409									87.1019	0.0004	fold change	-1.88	86.3066	0.0244	fold change	-1.67
ZNF397	84307	zinc finger protein 397	2 out of 4	173.283									91.5114	0.0104	fold change	-2.02	81.7715	0.0492	fold change	-1.55
CDKN1C	1028	cyclin-dependent kinase inhibitor 1C (p57, Kip2)	2 out of 4	173.165									86.1861	0.011	fold change	-1.86	86.9792	0.0053	fold change	-1.69
FGL2	10875	fibrinogen-like 2	2 out of 4	172.92									78.3822	0.0107	fold change	-1.7	94.5376	0.0167	fold change	-2.19
HIST1H2BC	8347	histone cluster 1, H2bc	2 out of 4	172.896					97.0761	0.0025	fold change	1.61					75.8196	0.0232	fold change	-1.44
SERTAD4-AS1	574036	SERTAD4 antisense RNA 1	2 out of 4	171.839									81.0701	0.001	fold change	-1.75	90.7688	0.0135	fold change	-1.85
SPTLC2	9517	serine palmitoyltransferase, long chain base subunit 2	2 out of 4	171.826									84.3526	0.0019	fold change	-1.82	87.4738	0.0182	fold change	-1.71
GINS1	9837	GINS complex subunit 1 (Psf1 homolog)	2 out of 4	171.814	78.2828	0.0136	fold change	1.43	93.5314	0.0178	fold change	1.48
BMP2K	55589	BMP2 inducible kinase	2 out of 4	171.764					93.5314	0.0052	fold change	1.48					78.2326	0.0128	fold change	-1.48
AI633559	NA		2 out of 4	171.612	79.3437	0.0109	fold change	1.44	92.2679	0.0133	fold change	1.46
LINC00467	84791	long intergenic non-protein coding RNA 467	2 out of 4	171.141					94.7562	0.0148	fold change	1.52					76.3849	0.0478	fold change	1.45
236936_at	NA		2 out of 4	171.041	97.9278	0.0033	fold change	-1.91					73.1133	0.0176	fold change	-1.61
211751_at	NA		2 out of 4	171.025	94.8299	0.0258	fold change	1.72					76.1951	0.0422	fold change	1.66
PDE1C	5137	phosphodiesterase 1C, calmodulin-dependent 70kDa	2 out of 4	171.018									87.9755	0.0162	fold change	-1.9	83.0427	0.0365	fold change	-1.58
CNP	1267	2',3'-cyclic nucleotide 3' phosphodiesterase	2 out of 4	170.852									90.8364	0.0105	fold change	-1.99	80.0154	0.035	fold change	-1.52
LSM5	23658	LSM5 homolog, U6 small nuclear RNA associated (S. cerevisiae)	2 out of 4	169.999					92.8954	0.0195	fold change	1.47	77.1034	0.0371	fold change	1.68
PRMT8	56341	protein arginine methyltransferase 8	2 out of 4	169.985									77.7871	0.0195	fold change	1.69	92.1982	0.0277	fold change	1.94
PRUNE2	158471	prune homolog 2 (Drosophila)	2 out of 4	169.276									88.7374	0.0054	fold change	-1.92	80.5386	0.0309	fold change	-1.53
SYK	6850	spleen tyrosine kinase	2 out of 4	169.261									74.9412	0.0007	fold change	-1.64	94.32	0.0028	fold change	-2.17
BE143535	NA		2 out of 4	168.947									83.8349	0.0002	fold change	-1.81	85.1122	0.032	fold change	-1.64
EID2B	126272	EP300 interacting inhibitor of differentiation 2B	2 out of 4	168.83	84.995	0.0319	fold change	1.51					83.8349	0.0256	fold change	1.81
TMPRSS5	80975	transmembrane protease, serine 5	2 out of 4	168.702	75.171	0.0403	fold change	-1.4	93.5314	0.039	fold change	-1.48
SPRY4	81848	sprouty homolog 4 (Drosophila)	2 out of 4	168.583									79.9105	0.0024	fold change	-1.73	88.6729	0.016	fold change	-1.76
PLXDC2	84898	plexin domain containing 2	2 out of 4	168.237									73.1133	0.0388	fold change	-1.61	95.1239	0.0174	fold change	-2.25
METTL21A	151194	methyltransferase like 21A	2 out of 4	167.98									76.1951	0.0166	fold change	1.66	91.7852	0.0006	fold change	1.92
EPB41L4B	54566	erythrocyte membrane protein band 4.1 like 4B	2 out of 4	167.778	88.9949	0.0467	fold change	1.58									78.7836	0.0044	fold change	1.49
GTF2H2B	653238	general transcription factor IIH, polypeptide 2B (pseudogene)	2 out of 4	167.556									74.9412	0.0398	fold change	1.64	92.6149	0.0044	fold change	1.97
ZNF658	26149	zinc finger protein 658	2 out of 4	167.319	79.3437	0.0258	fold change	1.44	87.9755	0.0031	fold change	1.4
NCAM1	4684	neural cell adhesion molecule 1	2 out of 4	167.284									89.447	0.006	fold change	-1.94	77.8368	0.0235	fold change	-1.47
PRRG1	5638	proline rich Gla (G-carboxyglutamic acid) 1	2 out of 4	167.158									83.3806	0.0125	fold change	-1.8	83.7774	0.0363	fold change	-1.6
PDS5A	23244	PDS5, regulator of cohesion maintenance, homolog A (S. cerevisiae)	2 out of 4	167.148	78.2828	0.0046	fold change	1.43	88.8652	0.0047	fold change	1.41
YPEL2	388403	yippee-like 2 (Drosophila)	2 out of 4	167.028									82.2084	0.0037	fold change	-1.77	84.8191	0.0122	fold change	-1.63
AA747756	NA		2 out of 4	166.623	73.7278	0.0284	fold change	1.39	92.8954	0.0045	fold change	1.47
ANGPT2	285	angiopoietin 2	2 out of 4	166.124									84.3526	0.0154	fold change	-1.82	81.7715	0.0479	fold change	-1.55
PXK	54899	PX domain containing serine/threonine kinase	2 out of 4	165.974	67.4191	0.0412	fold change	-1.34					98.5552	0.0091	fold change	-2.59
LRRC1	55227	leucine rich repeat containing 1	2 out of 4	165.645									87.4126	0.0006	fold change	-1.89	78.2326	0.0014	fold change	-1.48
LAT2	7462	linker for activation of T cells family, member 2	2 out of 4	165.494									71.7484	0.0053	fold change	-1.59	93.7453	0.0139	fold change	-2.1
FPR3	2359	formyl peptide receptor 3	2 out of 4	165.06									76.1951	0.0109	fold change	-1.66	88.8652	0.0105	fold change	-1.77
BCAP29	55973	B-cell receptor-associated protein 29	2 out of 4	164.955	84.468	0.0116	fold change	-1.5	80.4868	0.0143	fold change	1.34
CHST9	83539	carbohydrate (N-acetylgalactosamine 4-0) sulfotransferase 9	2 out of 4	164.805	88.6101	0.0311	fold change	1.57					76.1951	0.0445	fold change	1.66
USP54	159195	ubiquitin specific peptidase 54	2 out of 4	164.768									85.5271	0.0004	fold change	-1.84	79.2406	0.0061	fold change	-1.5
DPP10	57628	dipeptidyl-peptidase 10 (non-functional)	2 out of 4	164.389	91.9219	0.0155	fold change	1.65					72.4669	0.0116	fold change	1.6
SLC31A2	1318	solute carrier family 31 (copper transporters), member 2	2 out of 4	164.374									83.8349	0.0157	fold change	-1.81	80.5386	0.0444	fold change	-1.53
C6orf62	81688	chromosome 6 open reading frame 62	2 out of 4	163.806					88.8652	0.047	fold change	1.41	74.9412	0.0378	fold change	1.64
BTK	695	Bruton agammaglobulinemia tyrosine kinase	2 out of 4	163.795									74.217	0.0401	fold change	-1.63	89.5784	0.0214	fold change	-1.8
CPM	1368	carboxypeptidase M	2 out of 4	163.76									85.5271	0.019	fold change	-1.84	78.2326	0.0209	fold change	-1.48
FIBIN	387758	fin bud initiation factor homolog (zebrafish)	2 out of 4	163.645	80.4337	0.0017	fold change	1.45	83.2113	0.0396	fold change	1.36
PPBP	5473	pro-platelet basic protein (chemokine (C-X-C motif) ligand 7)	2 out of 4	163.589									73.6833	0.0014	fold change	-1.62	89.9054	0.0354	fold change	-1.81
BC041936	NA		2 out of 4	163.404									79.9105	0.0034	fold change	-1.73	83.4934	0.013	fold change	-1.59
TMEM132D	121256	transmembrane protein 132D	2 out of 4	163.354	82.7623	0.0415	fold change	1.48					80.5919	0.0287	fold change	1.74
C18orf54	162681	chromosome 18 open reading frame 54	2 out of 4	163.286									82.4294	0.0012	fold change	-1.78	80.8564	0.0094	fold change	-1.54
COX15	1355	COX15 homolog, cytochrome c oxidase assembly protein (yeast)	2 out of 4	162.927	78.2828	0.0014	fold change	1.43	84.6439	0.0057	fold change	1.37
COPS8	10920	COP9 constitutive photomorphogenic homolog subunit 8 (Arabidopsis)	2 out of 4	162.85	84.468	0.0339	fold change	1.5					78.3822	0.0175	fold change	1.7
GLTP	51228	glycolipid transfer protein	2 out of 4	162.773									84.9358	0.0087	fold change	-1.83	77.8368	0.0236	fold change	-1.47
AK000203	NA		2 out of 4	162.736									81.88	0.0176	fold change	-1.76	80.8564	0.0073	fold change	-1.54
PAXBP1	94104	GC-rich sequence DNA-binding factor 1	2 out of 4	162.684									76.1951	0.0001	fold change	-1.66	86.4887	0.0204	fold change	-1.68
MEIS1	4211	Meis homeobox 1	2 out of 4	162.534									85.5271	0.0103	fold change	-1.84	77.0072	0.0114	fold change	-1.46
CPQ	10404	carboxypeptidase Q	2 out of 4	162.415									74.9412	0.011	fold change	-1.64	87.4738	0.0442	fold change	-1.71
VSTM2A	222008	V-set and transmembrane domain containing 2A	2 out of 4	162.371	97.3066	0.0445	fold change	1.87					65.0643	0.0435	fold change	1.5
ZNF207	7756	zinc finger protein 207	2 out of 4	162.294									76.7672	0.0188	fold change	-1.67	85.5271	0.0466	fold change	-1.65
FBLN5	10516	fibulin 5	2 out of 4	162.212	75.171	0.0203	fold change	1.4	87.0413	0.0207	fold change	1.39
TLR7	51284	toll-like receptor 7	2 out of 4	161.912									65.9718	0.0102	fold change	-1.51	95.9398	0.0243	fold change	-2.32
ZNF273	10793	zinc finger protein 273	2 out of 4	161.597	82.7623	0.0218	fold change	1.48	78.8345	0.0327	fold change	1.33
TMC6	11322	transmembrane channel-like 6	2 out of 4	161.456									77.1034	0.0046	fold change	-1.68	84.3526	0.0164	fold change	-1.61
ST6GALNAC3	256435	ST6 (alpha-N-acetyl-neuraminyl-2,3-beta-galactosyl-1,3)-N-acetylgalactosaminide alpha-2,6-sialyltransferase 3	2 out of 4	161.362									69.1639	0.0464	fold change	-1.55	92.1982	0.0239	fold change	-1.94
HAGLR	401022	HOXD cluster antisense RNA 1	2 out of 4	161.321									84.9358	0.0198	fold change	-1.83	76.3849	0.0177	fold change	-1.45
SLC12A2	6558	solute carrier family 12 (sodium/potassium/chloride transporters), member 2	2 out of 4	161.217									83.3806	0.0109	fold change	-1.8	77.8368	0.0333	fold change	-1.47
PPM1D	8493	protein phosphatase, Mg2+/Mn2+ dependent, 1D	2 out of 4	161.014									76.1951	0.0032	fold change	-1.66	84.8191	0.0087	fold change	-1.63
HSPA13	6782	heat shock protein 70kDa family, member 13	2 out of 4	160.933	70.031	0.0313	fold change	1.36	90.9025	0.0116	fold change	1.44
AL559202	NA		2 out of 4	160.769	73.7278	0.0191	fold change	1.39	87.0413	0.0185	fold change	1.39
CYTL1	54360	cytokine-like 1	2 out of 4	160.707									65.0643	0.0069	fold change	-1.5	95.6425	0.0403	fold change	-2.3
ALOX5	240	arachidonate 5-lipoxygenase	2 out of 4	160.573									61.7002	0.0105	fold change	-1.46	98.8728	0.0367	fold change	-3.13
CKLF	51192	chemokine-like factor	2 out of 4	159.717					81.88	0.0212	fold change	1.35					77.8368	0.0349	fold change	-1.47
LSS	4047	lanosterol synthase (2,3-oxidosqualene-lanosterol cyclase)	2 out of 4	159.593									70.92	0.0107	fold change	-1.58	88.6729	0.0195	fold change	-1.76
LOC642852	642852	uncharacterized LOC642852	2 out of 4	159.409	77.201	0.0244	fold change	1.42					82.2084	0.0062	fold change	1.77
PSMG4	389362	proteasome (prosome, macropain) assembly chaperone 4	2 out of 4	158.976									76.7672	0.0046	fold change	-1.67	82.2084	0.0202	fold change	-1.56
ZEB1-AS1	220930	ZEB1 antisense RNA 1	2 out of 4	158.322	90.5682	0.0025	fold change	1.62	67.7534	0.043	fold change	1.27
BF056369	NA		2 out of 4	158.213									66.9057	0.0052	fold change	-1.52	91.3075	0.0026	fold change	-1.88
ATP11A	23250	ATPase, class VI, type 11A	2 out of 4	158.083									86.9172	0.032	fold change	-1.87	71.1663	0.0376	fold change	-1.38
MAP4K5	11183	mitogen-activated protein kinase kinase kinase kinase 5	2 out of 4	158.036									73.6833	0.0014	fold change	-1.62	84.3526	0.0277	fold change	-1.61
PREX1	57580	phosphatidylinositol-3,4,5-trisphosphate-dependent Rac exchange factor 1	2 out of 4	158.024									79.2406	0.0029	fold change	-1.72	78.7836	0.0243	fold change	-1.49
PDGFC	56034	platelet derived growth factor C	2 out of 4	158.006	70.031	0.0199	fold change	1.36	87.9755	0.0081	fold change	1.4
KLF2	10365	Kruppel-like factor 2 (lung)	2 out of 4	157.822	75.171	0.0251	fold change	-1.4									82.6515	0.0043	fold change	-1.57
PIR	8544	pirin (iron-binding nuclear protein)	2 out of 4	157.489					88.8652	0.0309	fold change	1.41	68.6238	0.0044	fold change	-1.54
DUSP10	11221	dual specificity phosphatase 10	2 out of 4	157.455									81.0701	0.0015	fold change	-1.75	76.3849	0.0047	fold change	-1.45
CYFIP1	23191	cytoplasmic FMR1 interacting protein 1	2 out of 4	157.297									68.6238	0.0149	fold change	-1.54	88.6729	0.0498	fold change	-1.76
MYO1E	4643	myosin IE	2 out of 4	157.028									77.7871	0.0261	fold change	-1.69	79.2406	0.0447	fold change	-1.5
BC036684	NA		2 out of 4	156.861									71.7484	0.0189	fold change	1.59	85.1122	0.0335	fold change	1.64
CYTH1	9267	cytohesin 1	2 out of 4	156.82									72.4669	0.0011	fold change	-1.6	84.3526	0.0041	fold change	-1.61
CERCAM	51148	cerebral endothelial cell adhesion molecule	2 out of 4	156.72	83.6064	0.0291	fold change	-1.49					73.1133	0.0413	fold change	-1.61
NCF2	4688	neutrophil cytosolic factor 2	2 out of 4	156.644									65.0643	0.0049	fold change	-1.5	91.5801	0.0212	fold change	-1.9
TMSB15B	286527	thymosin beta 15B	2 out of 4	156.485	68.5091	0.0286	fold change	1.35	87.9755	0.0034	fold change	1.4
ATM	472	ataxia telangiectasia mutated	2 out of 4	156.447									70.92	0.0014	fold change	-1.58	85.5271	0.021	fold change	-1.65
AW576443	NA		2 out of 4	156.35									75.4933	0.0086	fold change	1.65	80.8564	0.0047	fold change	1.54
MCM8	84515	minichromosome maintenance complex component 8	2 out of 4	156.295									79.9105	0.0035	fold change	-1.73	76.3849	0.0196	fold change	-1.45
LINC00537	203274	long intergenic non-protein coding RNA 537	2 out of 4	156.284	67.4191	0.0052	fold change	-1.34	88.8652	0.0391	fold change	-1.41
AOAH	313	acyloxyacyl hydrolase (neutrophil)	2 out of 4	156.244									72.4669	0.0015	fold change	-1.6	83.7774	0.0071	fold change	-1.6
ADGRL3	23284	latrophilin 3	2 out of 4	156.093	94.3931	0.0059	fold change	1.71					61.7002	0.0348	fold change	1.46
HCG11	493812	HLA complex group 11 (non-protein coding)	2 out of 4	156.036	77.201	0.0324	fold change	1.42	78.8345	0.0183	fold change	1.33
TMTC4	84899	transmembrane and tetratricopeptide repeat containing 4	2 out of 4	156.008									76.7672	0.0234	fold change	-1.67	79.2406	0.0164	fold change	-1.5
AI936859	NA		2 out of 4	156.008									76.7672	0.0081	fold change	-1.67	79.2406	0.0091	fold change	-1.5
AL355689	NA		2 out of 4	155.989									74.217	0.0128	fold change	-1.63	81.7715	0.0238	fold change	-1.55
CLEC4A	50856	C-type lectin domain family 4, member A	2 out of 4	155.917	70.031	0.0311	fold change	1.36									85.8856	0.0441	fold change	-1.66
MINCR	100507316	uncharacterized LOC100507316	2 out of 4	155.798									74.9412	0.0395	fold change	-1.64	80.8564	0.029	fold change	-1.54
2022-03-05	54708	membrane-associated ring finger (C3HC4) 5	2 out of 4	155.285					92.8954	0.0109	fold change	1.47	62.3893	0.0115	fold change	1.47
IVNS1ABP	10625	influenza virus NS1A binding protein	2 out of 4	155.145									75.4933	0.017	fold change	-1.65	79.6521	0.0402	fold change	-1.51
HS2ST1	9653	heparan sulfate 2-O-sulfotransferase 1	2 out of 4	154.837	79.3437	0.0233	fold change	1.44					75.4933	0.0348	fold change	1.65
ST18	9705	suppression of tumorigenicity 18 (breast carcinoma) (zinc finger protein)	2 out of 4	154.552									90.8364	0.0186	fold change	-1.99	63.7154	0.0017	fold change	-1.3
MFSD1	64747	major facilitator superfamily domain containing 1	2 out of 4	154.464					70.1115	0.0489	fold change	1.28					84.3526	0.045	fold change	-1.61
ZNF382	84911	zinc finger protein 382	2 out of 4	154.347	72.4669	0.0225	fold change	1.38					81.88	0.01	fold change	1.76
GUCY1B1	2983	guanylate cyclase 1, soluble, beta 3	2 out of 4	154.163	93.3184	0.0226	fold change	1.69					60.845	0.029	fold change	1.45
HNRNPA2B1	3181	heterogeneous nuclear ribonucleoprotein A2/B1	2 out of 4	154.137									65.9718	0.0006	fold change	-1.51	88.1648	0.0417	fold change	-1.74
SQLE	6713	squalene epoxidase	2 out of 4	154.106									61.7002	0.0191	fold change	-1.46	92.4061	0.0077	fold change	-1.96
HMBOX1	79618	homeobox containing 1	2 out of 4	154.014					94.4662	0.0179	fold change	-1.51					59.5479	0.0069	fold change	-1.26
AA583038	NA		2 out of 4	153.947					87.0413	0.0159	fold change	-1.39	66.9057	0.0273	fold change	-1.52
BF438300	NA		2 out of 4	153.899					72.1272	0.0152	fold change	-1.29					81.7715	0.0278	fold change	-1.55
SELPLG	6404	selectin P ligand	2 out of 4	153.787									63.4188	0.0471	fold change	-1.48	90.3685	0.0432	fold change	-1.83
C12orf66	144577	chromosome 12 open reading frame 66	2 out of 4	153.294	71.4143	0.0183	fold change	1.37	81.88	0.021	fold change	1.35
ACER3	55331	alkaline ceramidase 3	2 out of 4	153.089									69.5952	0.0057	fold change	-1.56	83.4934	0.0402	fold change	-1.59
SNHG10	283596	small nucleolar RNA host gene 10 (non-protein coding)	2 out of 4	152.976									68.6238	0.0237	fold change	-1.54	84.3526	0.024	fold change	-1.61
RBM48	84060	RNA binding motif protein 48	2 out of 4	152.976									68.6238	0.0023	fold change	-1.54	84.3526	0.0102	fold change	-1.61
RPS6KA1	6195	ribosomal protein S6 kinase, 90kDa, polypeptide 1	2 out of 4	152.951									65.9718	0.0034	fold change	-1.51	86.9792	0.0319	fold change	-1.69
HIP1	3092	huntingtin interacting protein 1	2 out of 4	152.806	59.3465	0.0445	fold change	-1.29					93.4597	0.0085	fold change	-2.1
CERS2	29956	ceramide synthase 2	2 out of 4	152.501									75.4933	0.0209	fold change	-1.65	77.0072	0.0445	fold change	-1.46
LILRA4	23547	leukocyte immunoglobulin-like receptor, subfamily A (with TM domain), member 4	2 out of 4	152.287									71.7484	0.0494	fold change	-1.59	80.5386	0.0338	fold change	-1.53
SLC16A1	6566	solute carrier family 16, member 1 (monocarboxylic acid transporter 1)	2 out of 4	152.069									61.7002	0.0415	fold change	-1.46	90.3685	0.0127	fold change	-1.83
LY75	4065	lymphocyte antigen 75	2 out of 4	152.062					98.0834	0.008	fold change	1.69	53.9782	0.0269	fold change	-1.38
ICOSLG	23308	inducible T-cell co-stimulator ligand	2 out of 4	152.043									70.2711	0.0216	fold change	-1.57	81.7715	0.0364	fold change	-1.55
NCKAP1L	3071	NCK-associated protein 1-like	2 out of 4	151.994									67.6416	0.0052	fold change	-1.53	84.3526	0.0433	fold change	-1.61
AA811371	NA		2 out of 4	151.897									73.1133	7.7e-06	fold change	-1.61	78.7836	0.0427	fold change	-1.49
CFC1	55997	cripto, FRL-1, cryptic family 1	2 out of 4	151.691	81.1781	0.0307	fold change	1.46									70.5129	0.0434	fold change	1.37
PEX13	5194	peroxisomal biogenesis factor 13	2 out of 4	151.269	73.7278	0.0195	fold change	1.39	77.541	0.0387	fold change	1.32
SRR	63826	serine racemase	2 out of 4	151.256	64.2145	0.0375	fold change	1.32	87.0413	0.0096	fold change	1.39
TRPC1	7220	transient receptor potential cation channel, subfamily C, member 1	2 out of 4	151.159					96.2408	0.0086	fold change	1.57	54.9185	0.0166	fold change	1.39
RAB14	51552	RAB14, member RAS oncogene family	2 out of 4	150.884	77.201	0.0286	fold change	1.42					73.6833	0.0276	fold change	1.62
RBBP6	5930	retinoblastoma binding protein 6	2 out of 4	150.804	75.171	0.0194	fold change	1.4	75.6327	0.0131	fold change	1.31
PLPP6	403313	phosphatidic acid phosphatase type 2 domain containing 2	2 out of 4	150.63	67.4191	0.0419	fold change	1.34	83.2113	0.0217	fold change	1.36
FAM133A	286499	family with sequence similarity 133, member A	2 out of 4	150.62	89.7747	0.0079	fold change	1.6					60.845	0.0064	fold change	1.45
JAM3	83700	junctional adhesion molecule 3	2 out of 4	150.34									78.3822	0.0012	fold change	-1.7	71.958	0.0167	fold change	-1.39
PRPF4B	8899	PRP4 pre-mRNA processing factor 4 homolog B (yeast)	2 out of 4	150.251					91.4445	0.0319	fold change	1.45	58.8069	0.0037	fold change	-1.43
RNF13	11342	ring finger protein 13	2 out of 4	150.037									74.217	0.0052	fold change	-1.63	75.8196	0.0194	fold change	-1.44
LOC100507520	100507520	uncharacterized LOC100507520	2 out of 4	149.981									71.7484	0.0281	fold change	-1.59	78.2326	0.0338	fold change	-1.48
ELOVL1	64834	ELOVL fatty acid elongase 1	2 out of 4	149.975									74.9412	0.0138	fold change	-1.64	75.0334	0.0363	fold change	-1.43
LRRTM4	80059	leucine rich repeat transmembrane neuronal 4	2 out of 4	149.786	86.3677	0.0471	fold change	1.53					63.4188	0.0288	fold change	1.48
GPC5	2262	glypican 5	2 out of 4	149.753									79.2406	0.0336	fold change	1.72	70.5129	0.0293	fold change	1.37
PCBP2	5094	poly(rC) binding protein 2	2 out of 4	149.725									63.4188	0.0301	fold change	-1.48	86.3066	0.0231	fold change	-1.67
OSBPL3	26031	oxysterol binding protein-like 3	2 out of 4	149.413									67.6416	0.0103	fold change	-1.53	81.7715	0.0256	fold change	-1.55
CSF2RA	1438	colony stimulating factor 2 receptor, alpha, low-affinity (granulocyte-macrophage)	2 out of 4	149.231					72.1272	0.0168	fold change	1.29	77.1034	0.0226	fold change	-1.68
HTR4	3360	5-hydroxytryptamine (serotonin) receptor 4, G protein-coupled	2 out of 4	149.183					83.2113	0.015	fold change	-1.36	65.9718	0.0271	fold change	1.51
MSH6	2956	mutS homolog 6 (E. coli)	2 out of 4	149.178									76.1951	0.0161	fold change	-1.66	72.9831	0.0038	fold change	-1.4
DNM3	26052	dynamin 3	2 out of 4	148.953									77.7871	0.0066	fold change	-1.69	71.1663	0.0294	fold change	-1.38
KANSL1L	151050	KAT8 regulatory NSL complex subunit 1-like	2 out of 4	148.946					70.1115	0.0212	fold change	1.28	78.8345	0.0251	fold change	-1.71
PLCL1	5334	phospholipase C-like 1	2 out of 4	148.933									73.1133	0.0204	fold change	-1.61	75.8196	0.0288	fold change	-1.44
AI733470	NA		2 out of 4	148.858									81.88	0.0305	fold change	-1.76	66.9783	0.0158	fold change	-1.33
PSEN1	5663	presenilin 1	2 out of 4	148.852									72.4669	0.0254	fold change	-1.6	76.3849	0.0276	fold change	-1.45
ITGAL	3683	integrin, alpha L (antigen CD11A (p180), lymphocyte function-associated antigen 1; alpha polypeptide)	2 out of 4	148.696									62.3893	0.0155	fold change	-1.47	86.3066	0.009	fold change	-1.67
INSR	3643	insulin receptor	2 out of 4	148.108									70.2711	0.002	fold change	-1.57	77.8368	0.0038	fold change	-1.47
RFFL	117584	ring finger and FYVE-like domain containing E3 ubiquitin protein ligase	2 out of 4	147.945									74.217	0.0018	fold change	-1.63	73.7278	0.0022	fold change	-1.41
Hs.21868.0.A1_3p_at	NA		2 out of 4	147.906	67.4191	0.021	fold change	-1.34	80.4868	0.0141	fold change	-1.34
RECQL	5965	RecQ protein-like (DNA helicase Q1-like)	2 out of 4	147.888					65.2367	0.0036	fold change	1.26					82.6515	0.0271	fold change	-1.57
ITIH4	3700	inter-alpha-trypsin inhibitor heavy chain family, member 4	2 out of 4	147.743									65.9718	0.0131	fold change	1.51	81.7715	0.0239	fold change	1.55
TAF9B	51616	TAF9B RNA polymerase II, TATA box binding protein (TBP)-associated factor, 31kDa	2 out of 4	147.675	49.9022	0.0153	fold change	1.23	97.7727	0.0149	fold change	1.67
NCF4	4689	neutrophil cytosolic factor 4, 40kDa	2 out of 4	147.64									64.147	0.0088	fold change	-1.49	83.4934	0.0267	fold change	-1.59
AA035730	NA		2 out of 4	147.586									61.7002	0.0403	fold change	-1.46	85.8856	0.0277	fold change	-1.66
PGM5	5239	phosphoglucomutase 5	2 out of 4	147.444									66.9057	0.0201	fold change	-1.52	80.5386	0.0358	fold change	-1.53
SASH3	54440	SAM and SH3 domain containing 3	2 out of 4	147.438									53.9782	0.0029	fold change	-1.38	93.4597	0.0153	fold change	-2.07
POT1	25913	protection of telomeres 1 homolog (S. pombe)	2 out of 4	147.426	64.2145	0.0233	fold change	1.32	83.2113	0.0254	fold change	1.36
KCNMB4	27345	potassium large conductance calcium-activated channel, subfamily M, beta member 4	2 out of 4	147.397									69.1639	0.0053	fold change	-1.55	78.2326	0.029	fold change	-1.48
USP15	9958	ubiquitin specific peptidase 15	2 out of 4	147.322	59.3465	0.0197	fold change	1.29	87.9755	0.0082	fold change	1.4
ANKRD13C	81573	ankyrin repeat domain 13C	2 out of 4	147.312	77.201	0.0192	fold change	1.42	70.1115	0.031	fold change	1.28
CHST3	9469	carbohydrate (chondroitin 6) sulfotransferase 3	2 out of 4	146.857									62.3893	0.0496	fold change	-1.47	84.468	0.0292	fold change	-1.62
SNHG12	85028	small nucleolar RNA host gene 12 (non-protein coding)	2 out of 4	146.461									63.4188	0.0394	fold change	-1.48	83.0427	0.0287	fold change	-1.58
FBXL7	23194	F-box and leucine-rich repeat protein 7	2 out of 4	146.461									63.4188	0.0089	fold change	-1.48	83.0427	0.0077	fold change	-1.58
MECOM	2122	MDS1 and EVI1 complex locus	2 out of 4	146.423	64.2145	0.0471	fold change	-1.32					82.2084	0.0153	fold change	-1.77
SOX10	6663	SRY (sex determining region Y)-box 10	2 out of 4	146.219									79.2406	0.0077	fold change	-1.72	66.9783	0.0141	fold change	-1.33
FZD5	7855	frizzled family receptor 5	2 out of 4	146.006									75.4933	0.0047	fold change	-1.65	70.5129	0.0264	fold change	-1.37
LYN	4067	v-yes-1 Yamaguchi sarcoma viral related oncogene homolog	2 out of 4	145.627									63.4188	0.0337	fold change	-1.48	82.2084	0.0399	fold change	-1.56
ZNF266	10781	zinc finger protein 266	2 out of 4	145.59					67.7534	0.0019	fold change	1.27					77.8368	0.0486	fold change	-1.47
TPP1	1200	tripeptidyl peptidase I	2 out of 4	145.304									70.2711	0.0092	fold change	-1.57	75.0334	0.0164	fold change	-1.43
ARHGEF2	9181	Rho/Rac guanine nucleotide exchange factor (GEF) 2	2 out of 4	145.304									70.2711	0.0172	fold change	-1.57	75.0334	0.0469	fold change	-1.43
SNX1	6642	sorting nexin 1	2 out of 4	145.194									61.7002	0.0136	fold change	-1.46	83.4934	0.0249	fold change	-1.59
SUGT1P3	283507	suppressor of G2 allele of SKP1 (S. cerevisiae) pseudogene 3	2 out of 4	145.152	82.7623	0.0047	fold change	1.48					62.3893	0.0235	fold change	1.47
ST6GAL1	6480	ST6 beta-galactosamide alpha-2,6-sialyltranferase 1	2 out of 4	145.083									53.9782	0.01	fold change	-1.38	91.1046	0.0166	fold change	-1.87
MYO9B	4650	myosin IXB	2 out of 4	145.009									68.6238	0.0008	fold change	-1.54	76.3849	0.031	fold change	-1.45
MACF1	23499	microtubule-actin crosslinking factor 1	2 out of 4	144.842					78.8345	0.0493	fold change	-1.33					66.0075	0.0286	fold change	-1.32
PTAFR	5724	platelet-activating factor receptor	2 out of 4	144.743									61.7002	0.0369	fold change	-1.46	83.0427	0.0301	fold change	-1.58
TMEM31	203562	transmembrane protein 31	2 out of 4	144.425									72.4669	0.0027	fold change	-1.6	71.958	0.0107	fold change	-1.39
TMEM209	84928	transmembrane protein 209	2 out of 4	144.401					85.706	0.0057	fold change	1.38					58.6951	0.014	fold change	-1.25
ABCA11P	79963	ATP-binding cassette, sub-family A (ABC1), member 11, pseudogene	2 out of 4	144.366					89.447	0.0443	fold change	1.42	54.9185	0.0333	fold change	1.39
MCM5	4174	minichromosome maintenance complex component 5	2 out of 4	144.338									60.845	0.0026	fold change	-1.45	83.4934	0.0012	fold change	-1.59
NEAT1	283131	nuclear paraspeckle assembly transcript 1 (non-protein coding)	2 out of 4	144.331	47.7874	0.0151	fold change	-1.22					96.5437	0.021	fold change	-2.35
FOXN2	3344	forkhead box N2	2 out of 4	144.28									73.1133	0.0167	fold change	-1.61	71.1663	0.0215	fold change	-1.38
ENPP5	59084	ectonucleotide pyrophosphatase/phosphodiesterase 5 (putative)	2 out of 4	144.255	78.2828	0.0268	fold change	1.43					65.9718	0.0306	fold change	1.51
DCLRE1B	64858	DNA cross-link repair 1B	2 out of 4	144.056	60.845	0.0138	fold change	1.3	83.2113	0.0004	fold change	1.36
Hs.547712	NA		2 out of 4	143.906					80.4868	0.044	fold change	-1.34	63.4188	0.0283	fold change	-1.48
MAP6D1	79929	MAP6 domain containing 1	2 out of 4	143.903									70.92	0.0019	fold change	-1.58	72.9831	0.0094	fold change	-1.4
SPACA6	147650	long intergenic non-protein coding RNA 85	2 out of 4	143.809									65.9718	0.002	fold change	-1.51	77.8368	0.0035	fold change	-1.47
INPP4B	8821	inositol polyphosphate-4-phosphatase, type II, 105kDa	2 out of 4	143.775	88.6101	0.0159	fold change	1.57	55.1651	0.0193	fold change	-1.22
TEP1	7011	telomerase-associated protein 1	2 out of 4	143.77									56.0456	0.0181	fold change	-1.4	87.7239	0.0247	fold change	-1.72
TJAP1	93643	tight junction associated protein 1 (peripheral)	2 out of 4	143.746									76.7672	0.0009	fold change	-1.67	66.9783	0.0128	fold change	-1.33
RHOG	391	ras homolog family member G	2 out of 4	143.657									68.6238	0.0006	fold change	-1.54	75.0334	0.0087	fold change	-1.43
ARL5A	26225	ADP-ribosylation factor-like 5A	2 out of 4	143.573					67.7534	0.0198	fold change	1.27					75.8196	0.0196	fold change	-1.44
ARHGAP30	257106	Rho GTPase activating protein 30	2 out of 4	143.557									53.9782	0.0058	fold change	-1.38	89.5784	0.0421	fold change	-1.8
MAF	4094	v-maf musculoaponeurotic fibrosarcoma oncogene homolog (avian)	2 out of 4	143.548					77.541	0.0248	fold change	1.32					66.0075	0.0227	fold change	-1.32
FLJ45482	645566	uncharacterized LOC645566	2 out of 4	143.461									67.6416	0.0158	fold change	-1.53	75.8196	0.0379	fold change	-1.44
AI695743	NA		2 out of 4	143.371	65.8302	0.033	fold change	1.33	77.541	0.0339	fold change	1.32
LCORL	254251	ligand dependent nuclear receptor corepressor-like	2 out of 4	143.278	78.2828	0.0043	fold change	1.43									64.995	0.0102	fold change	-1.31
LOC100507599	100507599	uncharacterized LOC100507599	2 out of 4	143.275	84.468	0.0094	fold change	1.5					58.8069	0.0069	fold change	1.43
UNC5B	219699	unc-5 homolog B (C. elegans)	2 out of 4	143.239									73.6833	0.0023	fold change	-1.62	69.5555	0.0027	fold change	-1.36
RCAN3	11123	RCAN family member 3	2 out of 4	143.239									73.6833	0.0011	fold change	-1.62	69.5555	0.0305	fold change	-1.36
GPR141	353345	G protein-coupled receptor 141	2 out of 4	143.16									58.8069	0.0046	fold change	-1.43	84.3526	0.0217	fold change	-1.61
MANBA	4126	mannosidase, beta A, lysosomal	2 out of 4	142.931									64.147	0.001	fold change	-1.49	78.7836	0.0205	fold change	-1.49
KLF11	8462	Kruppel-like factor 11	2 out of 4	142.904					60.6951	0.0452	fold change	1.24					82.2084	0.0041	fold change	-1.56
BF224430	NA		2 out of 4	142.675									67.6416	0.004	fold change	-1.53	75.0334	0.0431	fold change	-1.43
AHI1	54806	Abelson helper integration site 1	2 out of 4	142.503	68.5091	0.04	fold change	1.35	73.9941	0.0486	fold change	-1.3
GLCE	26035	glucuronic acid epimerase	2 out of 4	142.469	79.3437	0.0371	fold change	1.44	63.1257	0.0455	fold change	1.25
LIPE	3991	lipase, hormone-sensitive	2 out of 4	142.383									73.6833	0.0198	fold change	-1.62	68.7002	0.0496	fold change	-1.35
PHIP	55023	pleckstrin homology domain interacting protein	2 out of 4	142.265	77.201	0.0212	fold change	1.42					65.0643	0.0158	fold change	1.5
ZDHHC9	51114	zinc finger, DHHC-type containing 9	2 out of 4	142.203									76.1951	0.0252	fold change	-1.66	66.0075	0.037	fold change	-1.32
EPB41L2	2037	erythrocyte membrane protein band 4.1-like 2	2 out of 4	142.202									63.4188	0.0013	fold change	-1.48	78.7836	0.0041	fold change	-1.49
SDC2	6383	syndecan 2	2 out of 4	142.17	49.9022	0.0486	fold change	1.23	92.2679	0.0275	fold change	1.46
SYNJ2	8871	synaptojanin 2	2 out of 4	141.92									74.9412	0.0356	fold change	-1.64	66.9783	0.0471	fold change	-1.33
NAGA	4668	N-acetylgalactosaminidase, alpha-	2 out of 4	141.765									53.0921	0.006	fold change	-1.37	88.6729	0.0276	fold change	-1.76
AI733287	NA		2 out of 4	141.701									60.845	0.0373	fold change	-1.45	80.8564	0.0315	fold change	-1.54
RBPJ	3516	recombination signal binding protein for immunoglobulin kappa J region	2 out of 4	141.651									63.4188	0.0039	fold change	-1.48	78.2326	0.0346	fold change	-1.48
IMPACT	55364	Impact homolog (mouse)	2 out of 4	141.571					89.447	0.004	fold change	1.42	52.1241	0.0084	fold change	1.36
CXorf38	159013	chromosome X open reading frame 38	2 out of 4	141.428					81.88	0.0025	fold change	1.35					59.5479	0.0404	fold change	-1.26
ZGRF1	55345	chromosome 4 open reading frame 21	2 out of 4	141.213									66.9057	0.0012	fold change	-1.52	74.3075	0.0234	fold change	-1.42
SCIN	85477	scinderin	2 out of 4	141.067									41.1485	0.0375	fold change	-1.26	99.9181	0.0264	fold change	-8.5
ASCC1	51008	activating signal cointegrator 1 complex subunit 1	2 out of 4	141.015									58.8069	0.0352	fold change	-1.43	82.2084	0.0479	fold change	-1.56
RIT1	6016	Ras-like without CAAX 1	2 out of 4	141.015									58.8069	0.0176	fold change	-1.43	82.2084	0.0206	fold change	-1.56
CSRNP3	80034	cysteine-serine-rich nuclear protein 3	2 out of 4	140.884									65.0643	0.0053	fold change	1.5	75.8196	0.0256	fold change	1.44
PHF19	26147	PHD finger protein 19	2 out of 4	140.582									68.6238	0.0115	fold change	-1.54	71.958	0.0463	fold change	-1.39
ARHGAP15	55843	Rho GTPase activating protein 15	2 out of 4	140.375									47.6209	0.0432	fold change	-1.32	92.7541	0.0418	fold change	-1.99
AL048889	NA		2 out of 4	140.285									53.9782	0.0406	fold change	1.38	86.3066	0.0444	fold change	1.67
C21orf91	54149	chromosome 21 open reading frame 91	2 out of 4	140.108									69.5952	0.0054	fold change	-1.56	70.5129	0.026	fold change	-1.37
TIAL1	7073	TIA1 cytotoxic granule-associated RNA binding protein-like 1	2 out of 4	140.098									65.0643	0.0027	fold change	-1.5	75.0334	0.0006	fold change	-1.43
RGR	5995	retinal G protein coupled receptor	2 out of 4	139.847	64.2145	0.0484	fold change	-1.32	75.6327	0.0151	fold change	-1.31
TCAF1	9747	family with sequence similarity 115, member A	2 out of 4	139.824	65.8302	0.0465	fold change	1.33	73.9941	0.044	fold change	1.3
GPRC5B	51704	G protein-coupled receptor, family C, group 5, member B	2 out of 4	139.79									68.6238	0.0046	fold change	-1.54	71.1663	0.0265	fold change	-1.38
TXN	7295	thioredoxin	2 out of 4	139.772	56.5611	0.0147	fold change	1.27	83.2113	0.0027	fold change	1.36
ABHD2	11057	abhydrolase domain containing 2	2 out of 4	139.737									59.7215	0.0007	fold change	1.44	80.0154	0.0346	fold change	1.52
HLA-E	3133	major histocompatibility complex, class I, E	2 out of 4	139.715									51.0418	0.0222	fold change	-1.35	88.6729	0.0486	fold change	-1.76
N51511	NA		2 out of 4	139.629									60.845	0.01	fold change	-1.45	78.7836	0.0244	fold change	-1.49
PDE6B	5158	phosphodiesterase 6B, cGMP-specific, rod, beta	2 out of 4	139.18									64.147	0.0128	fold change	-1.49	75.0334	0.0176	fold change	-1.43
RPS27L	51065	ribosomal protein S27-like	2 out of 4	138.99	56.5611	0.0315	fold change	1.27					82.4294	0.0082	fold change	1.78
PIDD1	55367	p53-induced death domain protein	2 out of 4	138.792									65.0643	0.0147	fold change	-1.5	73.7278	0.0413	fold change	-1.41
LINC00894	100272228	uncharacterized LOC100272228	2 out of 4	138.727									71.7484	0.0001	fold change	-1.59	66.9783	0.0121	fold change	-1.33
PKNOX2	63876	PBX/knotted 1 homeobox 2	2 out of 4	138.723	73.7278	0.0194	fold change	1.39									64.995	0.0246	fold change	1.31
TIMELESS	8914	timeless homolog (Drosophila)	2 out of 4	138.682									60.845	0.0284	fold change	-1.45	77.8368	0.0365	fold change	-1.47
AW151660	NA		2 out of 4	138.432	64.2145	0.0259	fold change	-1.32					74.217	0.0319	fold change	-1.63
C15orf40	123207	chromosome 15 open reading frame 40	2 out of 4	138.244	62.6111	0.0165	fold change	1.31	75.6327	0.0128	fold change	1.31
ADA	100	adenosine deaminase	2 out of 4	138.047									65.0643	0.0172	fold change	-1.5	72.9831	0.047	fold change	-1.4
ABCA2	20	ATP-binding cassette, sub-family A (ABC1), member 2	2 out of 4	138.047									65.0643	0.0161	fold change	-1.5	72.9831	0.0411	fold change	-1.4
CDC42	998	cell division cycle 42 (GTP binding protein, 25kDa)	2 out of 4	137.956					95.7909	0.027	fold change	-1.55	42.1649	0.0439	fold change	-1.27
RAP1A	5906	RAP1A, member of RAS oncogene family	2 out of 4	137.817									56.0456	0.0042	fold change	-1.4	81.7715	0.0194	fold change	-1.55
FAM84A	151354	family with sequence similarity 84, member A	2 out of 4	137.641	94.3931	0.0158	fold change	1.71					43.2477	0.0238	fold change	1.28
IDS	3423	iduronate 2-sulfatase	2 out of 4	137.292	82.3737	0.0246	fold change	1.47					54.9185	0.0471	fold change	1.39
GPRIN3	285513	GPRIN family member 3	2 out of 4	137.024	82.3737	0.0318	fold change	1.47									54.6502	0.0384	fold change	1.21
TRIM23	373	tripartite motif containing 23	2 out of 4	136.887	59.3465	0.0491	fold change	1.29	77.541	0.0493	fold change	1.32
GEMIN2	8487	gem (nuclear organelle) associated protein 2	2 out of 4	136.844	76.1487	0.0053	fold change	1.41	60.6951	0.0341	fold change	1.24
DNAL1	83544	dynein, axonemal, light chain 1	2 out of 4	136.697									62.3893	0.0014	fold change	1.47	74.3075	0.0232	fold change	1.42
ARHGAP22	58504	Rho GTPase activating protein 22	2 out of 4	136.665									60.845	0.0196	fold change	-1.45	75.8196	0.0441	fold change	-1.44
TMEM156	80008	transmembrane protein 156	2 out of 4	136.461									66.9057	0.0005	fold change	-1.52	69.5555	0.0156	fold change	-1.36
PLEKHH2	130271	pleckstrin homology domain containing, family H (with MyTH4 domain) member 2	2 out of 4	136.372	53.161	0.03	fold change	1.25	83.2113	0.0468	fold change	1.36
LRRC7	57554	leucine rich repeat containing 7	2 out of 4	136.343	81.1781	0.0476	fold change	1.46	55.1651	0.0052	fold change	-1.22
TDRKH	11022	tudor and KH domain containing	2 out of 4	136.339	62.6111	0.0132	fold change	1.31									73.7278	0.0379	fold change	-1.41
AI640482	NA		2 out of 4	136.279									70.2711	0.0014	fold change	-1.57	66.0075	0.0192	fold change	-1.32
CEP41	95681	centrosomal protein 41kDa	2 out of 4	136.003	70.031	0.0472	fold change	1.36					65.9718	0.0281	fold change	-1.51
USP38	84640	ubiquitin specific peptidase 38	2 out of 4	135.843					72.1272	0.0244	fold change	1.29					63.7154	0.0336	fold change	-1.3
PTMA	5757	prothymosin, alpha	2 out of 4	135.814									58.8069	0.0136	fold change	-1.43	77.0072	0.0356	fold change	-1.46
213388_at	NA		2 out of 4	135.812	53.161	0.0313	fold change	1.25									82.6515	0.0272	fold change	-1.57
NASP	4678	nuclear autoantigenic sperm protein (histone-binding)	2 out of 4	135.527									65.9718	0.0276	fold change	-1.51	69.5555	0.0381	fold change	-1.36
PDGFA	5154	platelet-derived growth factor alpha polypeptide	2 out of 4	135.457									54.9185	0.0219	fold change	-1.39	80.5386	0.0311	fold change	-1.53
DGCR5	26220	DiGeorge syndrome critical region gene 5 (non-protein coding)	2 out of 4	135.335					83.2113	0.0073	fold change	-1.36	52.1241	0.0263	fold change	1.36
LOC101928304	101928304		2 out of 4	135.167									52.1241	0.0135	fold change	-1.36	83.0427	0.0021	fold change	-1.58
QDPR	5860	quinoid dihydropteridine reductase	2 out of 4	135.135	64.2145	0.0489	fold change	-1.32					70.92	0.0126	fold change	-1.58
LAMP1	3916	lysosomal-associated membrane protein 1	2 out of 4	134.934									54.9185	0.0033	fold change	-1.39	80.0154	0.0066	fold change	-1.52
ELOVL2-AS1	100506409	ELOVL2 antisense RNA 1	2 out of 4	134.874					63.1257	0.0138	fold change	1.25	71.7484	0.0217	fold change	1.59
TRAPPC10	7109	trafficking protein particle complex 10	2 out of 4	134.683									61.7002	0.0094	fold change	-1.46	72.9831	0.0096	fold change	-1.4
MBNL2	10150	muscleblind-like splicing regulator 2	2 out of 4	134.662					87.0413	0.0118	fold change	-1.39	47.6209	0.0442	fold change	-1.32
DDX39A	10212	DEAD (Asp-Glu-Ala-Asp) box polypeptide 39A	2 out of 4	134.656									57.6488	0.0075	fold change	-1.42	77.0072	0.0104	fold change	-1.46
SLC22A23	63027	solute carrier family 22, member 23	2 out of 4	134.62									67.6416	0.0019	fold change	-1.53	66.9783	0.0369	fold change	-1.33
APOBEC3G	60489	apolipoprotein B mRNA editing enzyme, catalytic polypeptide-like 3G	2 out of 4	134.546	49.9022	0.0022	fold change	-1.23	84.6439	0.0243	fold change	1.37
FUBP1	8880	far upstream element (FUSE) binding protein 1	2 out of 4	134.272	51.6204	0.0138	fold change	1.24									82.6515	0.0458	fold change	-1.57
AL832210	NA		2 out of 4	133.935									56.9282	0.0097	fold change	-1.41	77.0072	0.0147	fold change	-1.46
NFATC3	4775	nuclear factor of activated T-cells, cytoplasmic, calcineurin-dependent 3	2 out of 4	133.84									58.8069	0.0028	fold change	-1.43	75.0334	0.0053	fold change	-1.43
WNT2B	7482	wingless-type MMTV integration site family, member 2B	2 out of 4	133.81	64.2145	0.0232	fold change	1.32					69.5952	0.0101	fold change	-1.56
FNBP1	23048	formin binding protein 1	2 out of 4	133.765									65.0643	0.015	fold change	-1.5	68.7002	0.0484	fold change	-1.35
KIZ	55857	polo-like kinase 1 substrate 1	2 out of 4	133.658									61.7002	0.0216	fold change	-1.46	71.958	0.0495	fold change	-1.39
CDC42EP3	10602	CDC42 effector protein (Rho GTPase binding) 3	2 out of 4	133.63	93.3184	0.0039	fold change	1.69					40.3119	0.0433	fold change	1.25
CDK19	23097	cyclin-dependent kinase 19	2 out of 4	133.619									68.6238	0.0038	fold change	-1.54	64.995	0.0253	fold change	-1.31
ZDHHC21	340481	zinc finger, DHHC-type containing 21	2 out of 4	133.504	68.5091	0.0171	fold change	1.35									64.995	0.0496	fold change	1.31
PHACTR1	221692	phosphatase and actin regulator 1	2 out of 4	133.174	75.171	0.0306	fold change	1.4	58.0026	0.0194	fold change	-1.23
TXNDC16	57544	thioredoxin domain containing 16	2 out of 4	133.162	72.4669	0.0032	fold change	1.38	60.6951	0.0423	fold change	1.24
ZC3H14	79882	zinc finger CCCH-type containing 14	2 out of 4	133.162	72.4669	0.0178	fold change	1.38	60.6951	0.0244	fold change	1.24
UBE2J1	51465	ubiquitin-conjugating enzyme E2, J1	2 out of 4	133.157	70.031	0.0047	fold change	1.36	63.1257	0.0387	fold change	1.25
MTF2	22823	metal response element binding transcription factor 2	2 out of 4	133.113	49.9022	0.0434	fold change	1.23	83.2113	0.0209	fold change	1.36
LHFPL2	10184	lipoma HMGIC fusion partner-like 2	2 out of 4	133.107									53.0921	0.0199	fold change	-1.37	80.0154	0.0398	fold change	-1.52
GRN	2896	granulin	2 out of 4	133.107									53.0921	0.0037	fold change	-1.37	80.0154	0.0111	fold change	-1.52
ERMP1	79956	endoplasmic reticulum metallopeptidase 1	2 out of 4	132.974									63.4188	0.0228	fold change	-1.48	69.5555	0.0392	fold change	-1.36
SMARCE1	6605	SWI/SNF related, matrix associated, actin dependent regulator of chromatin, subfamily e, member 1	2 out of 4	132.927	92.6149	0.0063	fold change	1.66					40.3119	0.001	fold change	-1.25
CNPY3	10695	canopy 3 homolog (zebrafish)	2 out of 4	132.803									60.845	0.002	fold change	-1.45	71.958	0.0052	fold change	-1.39
BE620258	NA		2 out of 4	132.561					75.6327	0.017	fold change	1.31	56.9282	0.0246	fold change	-1.41
W96062	NA		2 out of 4	132.535									58.8069	0.0037	fold change	-1.43	73.7278	0.0188	fold change	-1.41
PIGK	10026	phosphatidylinositol glycan anchor biosynthesis, class K	2 out of 4	132.501					70.1115	0.0369	fold change	1.28	62.3893	0.0287	fold change	-1.47
VEZF1	7716	vascular endothelial zinc finger 1	2 out of 4	132.367									69.5952	0.0101	fold change	-1.56	62.7715	0.046	fold change	-1.29
CSGALNACT2	55454	chondroitin sulfate N-acetylgalactosaminyltransferase 2	2 out of 4	132.215					65.2367	0.004	fold change	1.26					66.9783	0.0205	fold change	-1.33
AK056249	NA		2 out of 4	132.134	82.3737	0.0019	fold change	1.47	49.7607	0.0233	fold change	1.2
CST3	1471	cystatin C	2 out of 4	132.099	75.171	0.0053	fold change	-1.4					56.9282	0.021	fold change	1.41
KIAA1958	158405	KIAA1958	2 out of 4	132.011									60.845	0.0042	fold change	-1.45	71.1663	0.0059	fold change	-1.38
AL050145	NA		2 out of 4	131.968	64.2145	0.0155	fold change	-1.32	67.7534	0.0449	fold change	-1.27
W81117	NA		2 out of 4	131.968	64.2145	0.0187	fold change	1.32	67.7534	0.047	fold change	1.27
FBXL17	64839	F-box and leucine-rich repeat protein 17	2 out of 4	131.858	88.6101	0.0091	fold change	1.57					43.2477	0.0365	fold change	1.28
BC000885	NA		2 out of 4	131.849					72.1272	0.0479	fold change	1.29	59.7215	0.0442	fold change	-1.44
CPEB3	22849	cytoplasmic polyadenylation element binding protein 3	2 out of 4	131.398									47.6209	0.0067	fold change	1.32	83.7774	0.0417	fold change	1.6
FAM208A	23272	family with sequence similarity 208, member A	2 out of 4	131.303									54.9185	0.0309	fold change	-1.39	76.3849	0.0004	fold change	-1.45
PCNX1	22990	pecanex homolog (Drosophila)	2 out of 4	131.217	75.171	0.0034	fold change	1.4					56.0456	0.0315	fold change	1.4
ZNF43	7594	zinc finger protein 43	2 out of 4	131.067	65.8302	0.0091	fold change	1.33	65.2367	0.0268	fold change	1.26
MRS2	57380	MRS2 magnesium homeostasis factor homolog (S. cerevisiae)	2 out of 4	131.067	65.8302	0.0063	fold change	1.33	65.2367	0.0043	fold change	1.26
CACNB2	783	calcium channel, voltage-dependent, beta 2 subunit	2 out of 4	131.001	92.6149	0.0429	fold change	1.66					38.3859	0.0496	fold change	1.23
SLC35B3	51000	solute carrier family 35, member B3	2 out of 4	130.888									59.7215	0.0041	fold change	-1.44	71.1663	0.0301	fold change	-1.38
1561596_at	NA		2 out of 4	130.765									58.8069	0.0177	fold change	-1.43	71.958	0.0247	fold change	-1.39
CCDC30	728621	coiled-coil domain containing 30	2 out of 4	130.726	70.031	0.001	fold change	1.36	60.6951	0.0017	fold change	-1.24
DIS3	22894	DIS3 mitotic control homolog (S. cerevisiae)	2 out of 4	130.726	70.031	0.0306	fold change	1.36	60.6951	0.0033	fold change	1.24
PAQR8	85315	progestin and adipoQ receptor family member VIII	2 out of 4	130.656									56.9282	0.0084	fold change	-1.41	73.7278	0.0444	fold change	-1.41
BE645256	NA		2 out of 4	130.461									49.9226	0.0478	fold change	-1.34	80.5386	0.0315	fold change	-1.53
240690_at	NA		2 out of 4	130.4									61.7002	0.0074	fold change	1.46	68.7002	0.0338	fold change	1.35
FBXO3	26273	F-box protein 3	2 out of 4	130.365	62.6111	0.018	fold change	1.31	67.7534	0.0164	fold change	1.27
HECTD2	143279	HECT domain containing E3 ubiquitin protein ligase 2	2 out of 4	130.293	77.201	0.0416	fold change	1.42					53.0921	0.0176	fold change	1.37
DST	667	dystonin	2 out of 4	130.234									59.7215	0.0345	fold change	-1.44	70.5129	0.0442	fold change	-1.37
ZMYND8	23613	zinc finger, MYND-type containing 8	2 out of 4	130.104					63.1257	0.0187	fold change	-1.25					66.9783	0.0244	fold change	1.33
PPHLN1	51535	periphilin 1	2 out of 4	130.031					63.1257	0.017	fold change	-1.25	66.9057	0.0415	fold change	1.52
TTC17	55761	tetratricopeptide repeat domain 17	2 out of 4	130.014					88.8652	0.0007	fold change	1.41	41.1485	0.0464	fold change	-1.26
AL137494	NA		2 out of 4	129.961					58.0026	0.0262	fold change	-1.23					71.958	0.0329	fold change	-1.39
ANAPC5	51433	anaphase promoting complex subunit 5	2 out of 4	129.911									56.9282	0.0041	fold change	-1.41	72.9831	0.0114	fold change	-1.4
Hs.561542	NA		2 out of 4	129.776					72.1272	0.0003	fold change	-1.29					57.6488	0.0231	fold change	-1.24
POU3F3	5455	POU class 3 homeobox 3	2 out of 4	129.687									65.9718	0.0175	fold change	-1.51	63.7154	0.0286	fold change	-1.3
IRF2BP2	359948	interferon regulatory factor 2 binding protein 2	2 out of 4	129.607									57.6488	0.0009	fold change	-1.42	71.958	0.0063	fold change	-1.39
FGD2	221472	FYVE, RhoGEF and PH domain containing 2	2 out of 4	129.546	65.8302	0.0109	fold change	-1.33									63.7154	0.0292	fold change	-1.3
LOC100134937	100134937	uncharacterized LOC100134937	2 out of 4	129.358	55.3636	0.0263	fold change	1.26	73.9941	0.0323	fold change	1.3
C1orf61	10485	chromosome 1 open reading frame 61	2 out of 4	129.354	68.5091	0.0175	fold change	-1.35					60.845	0.0042	fold change	1.45
C2orf68	388969	chromosome 2 open reading frame 68	2 out of 4	129.32									58.8069	0.001	fold change	-1.43	70.5129	0.0104	fold change	-1.37
VAMP3	9341	vesicle-associated membrane protein 3 (cellubrevin)	2 out of 4	129.274									51.0418	0.0045	fold change	-1.35	78.2326	0.0307	fold change	-1.48
KBTBD2	25948	kelch repeat and BTB (POZ) domain containing 2	2 out of 4	129.234					75.6327	0.0203	fold change	1.31					53.6015	0.0358	fold change	-1.2
AI824407	NA		2 out of 4	129.21	64.2145	0.0137	fold change	1.32									64.995	0.0371	fold change	-1.31
RAPGEF3	10411	Rap guanine nucleotide exchange factor (GEF) 3	2 out of 4	129.119	67.4191	0.0065	fold change	-1.34					61.7002	0.0275	fold change	-1.46
2022-09-08	23176	septin 8	2 out of 4	129.057	42.8706	0.0384	fold change	-1.2					86.1861	0.0464	fold change	-1.86
FAM87A	157693	family with sequence similarity 87, member A	2 out of 4	129.029									56.0456	0.0061	fold change	1.4	72.9831	0.0145	fold change	1.4
MAGI2-AS3	100505881	MAGI2 antisense RNA 3	2 out of 4	128.918					70.1115	0.0144	fold change	1.28	58.8069	0.028	fold change	-1.43
HSF2	3298	heat shock transcription factor 2	2 out of 4	128.893	73.7278	0.0041	fold change	1.39	55.1651	0.048	fold change	1.22
PYCARD	29108	PYD and CARD domain containing	2 out of 4	128.472									42.1649	0.0028	fold change	-1.27	86.3066	0.0142	fold change	-1.67
IRAK1BP1	134728	interleukin-1 receptor-associated kinase 1 binding protein 1	2 out of 4	128.414									63.4188	0.0038	fold change	1.48	64.995	0.0348	fold change	1.31
LOC102606465	102606465		2 out of 4	128.231	68.5091	0.0061	fold change	1.35					59.7215	0.0149	fold change	1.44
FAM110B	90362	family with sequence similarity 110, member B	2 out of 4	128.205	78.2828	0.0176	fold change	1.43					49.9226	0.0415	fold change	1.34
JPT2	90861	hematological and neurological expressed 1-like	2 out of 4	128.107									72.4669	0.0204	fold change	-1.6	55.6396	0.0093	fold change	-1.22
PHLDA1	22822	pleckstrin homology-like domain, family A, member 1	2 out of 4	128.034	70.031	0.0175	fold change	1.36	58.0026	0.024	fold change	1.23
EML1	2009	echinoderm microtubule associated protein like 1	2 out of 4	127.902									54.9185	0.0256	fold change	-1.39	72.9831	0.0131	fold change	-1.4
ITSN2	50618	intersectin 2	2 out of 4	127.862									64.147	0.0007	fold change	-1.49	63.7154	0.0091	fold change	-1.3
SEMA4C	54910	sema domain, immunoglobulin domain (Ig), transmembrane domain (TM) and short cytoplasmic domain, (semaphorin) 4C	2 out of 4	127.708									61.7002	0.0091	fold change	-1.46	66.0075	0.0281	fold change	-1.32
ZMYND15	84225	zinc finger, MYND-type containing 15	2 out of 4	127.706									53.9782	0.0107	fold change	-1.38	73.7278	0.0155	fold change	-1.41
AK000850	NA		2 out of 4	127.675	62.6111	0.0498	fold change	-1.31					65.0643	0.0293	fold change	-1.5
SPG11	80208	spastic paraplegia 11 (autosomal recessive)	2 out of 4	127.661									66.9057	0.0007	fold change	-1.52	60.7548	0.0054	fold change	-1.27
NDUFS8	4728	NADH dehydrogenase (ubiquinone) Fe-S protein 8, 23kDa (NADH-coenzyme Q reductase)	2 out of 4	127.491	55.3636	0.0237	fold change	1.26	72.1272	0.0224	fold change	-1.29
DPH6	89978	ATP binding domain 4	2 out of 4	127.475					67.7534	0.0311	fold change	1.27	59.7215	0.036	fold change	1.44
ZNF334	55713	zinc finger protein 334	2 out of 4	127.443	49.9022	0.007	fold change	1.23	77.541	0.0103	fold change	1.32
RNASE3	6037	ribonuclease, RNase A family, 3	2 out of 4	127.4									53.0921	0.0074	fold change	-1.37	74.3075	0.0418	fold change	-1.42
TMEM132B	114795	transmembrane protein 132B	2 out of 4	127.19	76.1487	0.0291	fold change	1.41					51.0418	0.0131	fold change	1.35
P2RY1	5028	purinergic receptor P2Y, G-protein coupled, 1	2 out of 4	127.117									72.4669	0.0323	fold change	1.6	54.6502	0.0224	fold change	1.21
GLMP	112770	chromosome 1 open reading frame 85	2 out of 4	127.1	59.3465	0.0305	fold change	1.29	67.7534	0.0146	fold change	1.27
CEP70	80321	centrosomal protein 70kDa	2 out of 4	127.1	59.3465	0.0448	fold change	1.29	67.7534	0.0203	fold change	1.27
GLUD2	2747	glutamate dehydrogenase 2	2 out of 4	126.991					80.4868	0.0303	fold change	1.34	46.5038	0.0321	fold change	1.31
GNPDA2	132789	glucosamine-6-phosphate deaminase 2	2 out of 4	126.673	56.5611	0.0283	fold change	1.27	70.1115	0.0308	fold change	1.28
ANAPC1	64682	anaphase promoting complex subunit 1	2 out of 4	126.673	56.5611	0.0438	fold change	1.27	70.1115	0.0323	fold change	1.28
SRRD	402055	SRR1 domain containing	2 out of 4	126.525	65.8302	0.0008	fold change	1.33	60.6951	0.0273	fold change	1.24
GLDC	2731	glycine dehydrogenase (decarboxylating)	2 out of 4	126.105					72.1272	0.0401	fold change	1.29	53.9782	0.003	fold change	1.38
RSU1	6251	Ras suppressor protein 1	2 out of 4	126.096					52.3681	0.0024	fold change	-1.21					73.7278	0.0065	fold change	-1.41
ZUFSP	221302	zinc finger with UFM1-specific peptidase domain	2 out of 4	126.096	73.7278	0.0008	fold change	1.39	52.3681	0.0209	fold change	1.21
HSD17B1	3292	hydroxysteroid (17-beta) dehydrogenase 1	2 out of 4	126.002									64.147	0.0002	fold change	-1.49	61.8552	0.0372	fold change	-1.28
GPSM2	29899	G-protein signaling modulator 2	2 out of 4	125.866	58.1125	0.0422	fold change	-1.28	67.7534	0.0227	fold change	1.27
EIF4B	1975	eukaryotic translation initiation factor 4B	2 out of 4	125.852									52.1241	0.0134	fold change	-1.36	73.7278	0.0264	fold change	-1.41
HAUS1	115106	HAUS augmin-like complex, subunit 1	2 out of 4	125.833					89.447	0.0035	fold change	1.42	36.3859	0.0404	fold change	-1.21
FNTB	2342	farnesyltransferase, CAAX box, beta	2 out of 4	125.785									58.8069	0.0003	fold change	-1.43	66.9783	0.0057	fold change	-1.33
CXorf57	55086	chromosome X open reading frame 57	2 out of 4	125.744									46.5038	0.0183	fold change	-1.31	79.2406	0.0314	fold change	-1.5
TPBGL	100507050	trophoblast glycoprotein-like	2 out of 4	125.601									56.0456	0.0381	fold change	1.4	69.5555	0.0241	fold change	1.36
CRYZL2P	730102	quinone oxidoreductase-like protein 2 pseudogene	2 out of 4	125.338					78.8345	0.0126	fold change	1.33	46.5038	0.0408	fold change	1.31
SLC9A9	285195	solute carrier family 9, subfamily A (NHE9, cation proton antiporter 9), member 9	2 out of 4	125.294									48.9093	0.0224	fold change	-1.33	76.3849	0.0432	fold change	-1.45
BACE1	23621	beta-site APP-cleaving enzyme 1	2 out of 4	125.107									52.1241	0.0179	fold change	-1.36	72.9831	0.0481	fold change	-1.4
BBS9	27241	Bardet-Biedl syndrome 9	2 out of 4	124.956									49.9226	0.0043	fold change	-1.34	75.0334	0.0085	fold change	-1.43
NMT2	9397	N-myristoyltransferase 2	2 out of 4	124.932	75.171	0.013	fold change	1.4	49.7607	0.0357	fold change	-1.2
MTRR	4552	5-methyltetrahydrofolate-homocysteine methyltransferase reductase	2 out of 4	124.814									58.8069	0.0071	fold change	-1.43	66.0075	0.0064	fold change	-1.32
ZNF274	10782	zinc finger protein 274	2 out of 4	124.746									56.0456	0.0129	fold change	-1.4	68.7002	0.0292	fold change	-1.35
PGGT1B	5229	protein geranylgeranyltransferase type I, beta subunit	2 out of 4	124.682					67.7534	0.0083	fold change	1.27	56.9282	0.0414	fold change	1.41
PYGO1	26108	pygopus homolog 1 (Drosophila)	2 out of 4	124.627									57.6488	0.02	fold change	1.42	66.9783	0.0036	fold change	1.33
SERPINA5	5104	serpin peptidase inhibitor, clade A (alpha-1 antiproteinase, antitrypsin), member 5	2 out of 4	124.511									45.2706	0.044	fold change	-1.3	79.2406	0.0467	fold change	-1.5
PCDH17	27253	protocadherin 17	2 out of 4	124.315	56.5611	0.0451	fold change	1.27	67.7534	0.0278	fold change	1.27
PLCG2	5336	phospholipase C, gamma 2 (phosphatidylinositol-specific)	2 out of 4	124.239	45.4046	0.0081	fold change	-1.21					78.8345	0.0021	fold change	-1.71
GFM1	85476	G elongation factor, mitochondrial 1	2 out of 4	124.164					88.8652	0.0369	fold change	1.41	35.2993	0.0278	fold change	1.2
N4BP2L1	90634	NEDD4 binding protein 2-like 1	2 out of 4	124.111	67.4191	0.04	fold change	1.34									56.6919	0.0361	fold change	1.23
SCARB2	950	scavenger receptor class B, member 2	2 out of 4	124.045					81.88	0.012	fold change	1.35	42.1649	0.0045	fold change	-1.27
MED6	10001	mediator complex subunit 6	2 out of 4	123.971	60.845	0.0393	fold change	1.3	63.1257	0.0221	fold change	1.25
HNMT	3176	histamine N-methyltransferase	2 out of 4	123.802									58.8069	0.0303	fold change	1.43	64.995	0.0099	fold change	-1.31
PCOLCE	5118	procollagen C-endopeptidase enhancer	2 out of 4	123.762									56.0456	0.0033	fold change	-1.4	67.7167	0.0465	fold change	-1.34
ZFHX3	463	zinc finger homeobox 3	2 out of 4	123.65									49.9226	0.0352	fold change	-1.34	73.7278	0.0399	fold change	-1.41
IRX5	10265	iroquois homeobox 5	2 out of 4	123.65									49.9226	0.0176	fold change	-1.34	73.7278	0.0441	fold change	-1.41
PIAS4	51588	protein inhibitor of activated STAT, 4	2 out of 4	123.555									61.7002	0.01	fold change	-1.46	61.8552	0.0466	fold change	-1.28
GSTO2	119391	glutathione S-transferase omega 2	2 out of 4	123.479	65.8302	0.0216	fold change	1.33									57.6488	0.0152	fold change	1.24
CDKN3	1033	cyclin-dependent kinase inhibitor 3	2 out of 4	123.479	65.8302	0.0195	fold change	1.33					57.6488	0.0337	fold change	1.42
ZNF682	91120	zinc finger protein 682	2 out of 4	123.428	68.5091	0.0288	fold change	1.35					54.9185	0.0023	fold change	1.39
ZNF7	7553	zinc finger protein 7	2 out of 4	123.272	53.161	0.0493	fold change	1.25	70.1115	0.0122	fold change	1.28
IPP	3652	intracisternal A particle-promoted polypeptide	2 out of 4	123.254					75.6327	0.0005	fold change	1.31	47.6209	0.0007	fold change	1.32
GSE1	23199	Gse1 coiled-coil protein homolog (mouse)	2 out of 4	123.217									48.9093	0.0245	fold change	1.33	74.3075	0.0187	fold change	1.42
PTEN	5728	phosphatase and tensin homolog	2 out of 4	123.217									48.9093	0.0181	fold change	1.33	74.3075	0.0205	fold change	1.42
PPM1K	152926	protein phosphatase, Mg2+/Mn2+ dependent, 1K	2 out of 4	122.653	76.1487	0.0151	fold change	1.41					46.5038	0.0156	fold change	1.31
NFKB1	4790	nuclear factor of kappa light polypeptide gene enhancer in B-cells 1	2 out of 4	122.648									53.0921	0.042	fold change	-1.37	69.5555	0.0391	fold change	-1.36
WWC3	55841	WWC family member 3	2 out of 4	122.522									58.8069	0.039	fold change	-1.43	63.7154	0.0377	fold change	-1.3
PLXNC1	10154	plexin C1	2 out of 4	122.456	71.4143	0.0154	fold change	1.37					51.0418	0.0221	fold change	1.35
TCF12	6938	transcription factor 12	2 out of 4	122.456	71.4143	0.0386	fold change	-1.37					51.0418	0.0029	fold change	-1.35
CDR2L	30850	cerebellar degeneration-related protein 2-like	2 out of 4	122.114									63.4188	0.0006	fold change	-1.48	58.6951	0.0285	fold change	-1.25
DZIP1L	199221	DAZ interacting protein 1-like	2 out of 4	121.655									45.2706	0.0343	fold change	-1.3	76.3849	0.0016	fold change	-1.45
MEGF10	84466	multiple EGF-like-domains 10	2 out of 4	121.555									51.0418	0.0057	fold change	-1.35	70.5129	0.0273	fold change	-1.37
SUV39H2	79723	suppressor of variegation 3-9 homolog 2 (Drosophila)	2 out of 4	121.238	58.1125	0.01	fold change	1.28	63.1257	0.0043	fold change	1.25
LOC101929224	101929224		2 out of 4	121.238	58.1125	0.0077	fold change	1.28	63.1257	0.0478	fold change	1.25
LOC728705	728705	uncharacterized LOC728705	2 out of 4	121.175	71.4143	0.0146	fold change	1.37	49.7607	0.0094	fold change	1.2
HERC4	26091	HECT and RLD domain containing E3 ubiquitin protein ligase 4	2 out of 4	121.153					70.1115	0.0092	fold change	-1.28	51.0418	0.0146	fold change	-1.35
RBM14	10432	RNA binding motif protein 14	2 out of 4	121.099					81.88	0.0369	fold change	-1.35	39.2188	0.0411	fold change	-1.24
BMPR2	659	bone morphogenetic protein receptor, type II (serine/threonine kinase)	2 out of 4	121.036					72.1272	0.0477	fold change	1.29	48.9093	0.0361	fold change	1.33
AI733828	NA		2 out of 4	120.867									48.9093	0.0051	fold change	-1.33	71.958	0.0164	fold change	-1.39
H3F3A	3020	H3 histone, family 3A	2 out of 4	120.774					58.0026	0.0291	fold change	1.23					62.7715	0.0372	fold change	-1.29
STAG1	10274	stromal antigen 1	2 out of 4	120.6	55.3636	0.0184	fold change	-1.26	65.2367	0.0027	fold change	-1.26
BF436080	NA		2 out of 4	120.476									59.7215	0.0214	fold change	-1.44	60.7548	0.042	fold change	-1.27
TBCEL	219899	tubulin folding cofactor E-like	2 out of 4	120.436									49.9226	0.0077	fold change	1.34	70.5129	0.015	fold change	1.37
LINC00290	728081	long intergenic non-protein coding RNA 290	2 out of 4	120.191	59.3465	0.0398	fold change	1.29					60.845	0.0165	fold change	1.45
GAD2	2572	glutamate decarboxylase 2 (pancreatic islets and brain, 65kDa)	2 out of 4	120.157									38.3859	0.0108	fold change	1.23	81.7715	0.0385	fold change	1.55
SPATA13	221178	spermatogenesis associated 13	2 out of 4	119.808	65.8302	0.0107	fold change	-1.33					53.9782	0.0134	fold change	-1.38
Hs.133540.0.A1_3p_at	NA		2 out of 4	119.687	56.5611	0.0119	fold change	-1.27	63.1257	0.0226	fold change	-1.25
G3BP2	9908	GTPase activating protein (SH3 domain) binding protein 2	2 out of 4	119.551	68.5091	0.038	fold change	1.35					51.0418	0.048	fold change	1.35
SMURF1	57154	SMAD specific E3 ubiquitin protein ligase 1	2 out of 4	119.504									57.6488	0.0092	fold change	-1.42	61.8552	0.0328	fold change	-1.28
KLC1	3831	kinesin light chain 1	2 out of 4	119.504									57.6488	0.016	fold change	-1.42	61.8552	0.0058	fold change	-1.28
TRIO	7204	trio Rho guanine nucleotide exchange factor	2 out of 4	119.39					60.6951	0.0337	fold change	-1.24					58.6951	0.0097	fold change	1.25
NR2F1-AS1	441094	uncharacterized LOC441094	2 out of 4	119.068	59.3465	0.0399	fold change	1.29					59.7215	0.0375	fold change	1.44
AKR1C1	1645	aldo-keto reductase family 1, member C1 (dihydrodiol dehydrogenase 1; 20-alpha (3-alpha)-hydroxysteroid dehydrogenase)	2 out of 4	118.998									45.2706	0.0418	fold change	-1.3	73.7278	0.0295	fold change	-1.41
FAM161A	84140	family with sequence similarity 161, member A	2 out of 4	118.848	60.845	0.0083	fold change	1.3	58.0026	0.0054	fold change	1.23
AMD1	262	adenosylmethionine decarboxylase 1	2 out of 4	118.817									56.0456	0.0111	fold change	-1.4	62.7715	0.0466	fold change	-1.29
AS3MT	57412	arsenic (+3 oxidation state) methyltransferase	2 out of 4	118.808	58.1125	0.0265	fold change	1.28	60.6951	0.0323	fold change	1.24
BPTF	2186	bromodomain PHD finger transcription factor	2 out of 4	118.511					83.2113	9.5e-05	fold change	1.36	35.2993	0.0324	fold change	-1.2
VAV1	7409	vav 1 guanine nucleotide exchange factor	2 out of 4	118.462									46.5038	0.0005	fold change	-1.31	71.958	0.0345	fold change	-1.39
LINC-PINT	378805	uncharacterized LOC378805	2 out of 4	118.087									53.0921	0.0174	fold change	1.37	64.995	0.0057	fold change	1.31
CPSF6	11052	cleavage and polyadenylation specific factor 6, 68kDa	2 out of 4	117.985									42.1649	0.0335	fold change	-1.27	75.8196	0.0112	fold change	-1.44
EEF1AKMT2	399818	methyltransferase like 10	2 out of 4	117.834	58.1125	0.0411	fold change	1.28					59.7215	0.0275	fold change	1.44
AF075103	NA		2 out of 4	117.656	49.9022	0.0464	fold change	-1.23	67.7534	0.0173	fold change	-1.27
ZNF627	199692	zinc finger protein 627	2 out of 4	117.656	49.9022	0.0191	fold change	1.23	67.7534	0.0048	fold change	1.27
CRY2	1408	cryptochrome 2 (photolyase-like)	2 out of 4	117.639									49.9226	0.0222	fold change	1.34	67.7167	0.0153	fold change	1.34
DBI	1622	diazepam binding inhibitor (GABA receptor modulator, acyl-CoA binding protein)	2 out of 4	117.551					58.0026	0.0095	fold change	1.23					59.5479	0.0339	fold change	-1.26
KIF2A	3796	kinesin heavy chain member 2A	2 out of 4	117.398					72.1272	0.0038	fold change	1.29	45.2706	0.0241	fold change	1.3
MRPL43	84545	mitochondrial ribosomal protein L43	2 out of 4	117.383	47.7874	0.0476	fold change	1.22					69.5952	0.0287	fold change	-1.56
MIS18A	54069	MIS18 kinetochore protein homolog A (S. pombe)	2 out of 4	117.349	59.3465	0.0202	fold change	1.29	58.0026	0.0284	fold change	1.23
RBM24	221662	RNA binding motif protein 24	2 out of 4	117.336	75.171	0.0175	fold change	1.4					42.1649	0.041	fold change	1.27
APPBP2	10513	amyloid beta precursor protein (cytoplasmic tail) binding protein 2	2 out of 4	117.119									52.1241	0.0001	fold change	-1.36	64.995	0.0309	fold change	-1.31
ZNF300	91975	zinc finger protein 300	2 out of 4	117.049									51.0418	0.003	fold change	-1.35	66.0075	0.0476	fold change	-1.32
LOC401320	401320	uncharacterized LOC401320	2 out of 4	116.598	42.8706	0.0465	fold change	-1.2									73.7278	0.0035	fold change	1.41
CSTF3	1479	cleavage stimulation factor, 3' pre-RNA, subunit 3, 77kDa	2 out of 4	116.583	64.2145	0.0115	fold change	1.32	52.3681	0.0309	fold change	1.21
GRHPR	9380	glyoxylate reductase/hydroxypyruvate reductase	2 out of 4	116.437									45.2706	0.0187	fold change	-1.3	71.1663	0.0216	fold change	-1.38
NLRC4	58484	NLR family, CARD domain containing 4	2 out of 4	116.231									43.2477	0.0049	fold change	-1.28	72.9831	0.0324	fold change	-1.4
MIR99AHG	388815	long intergenic non-protein coding RNA 478	2 out of 4	116.218					63.1257	0.0253	fold change	1.25	53.0921	0.0094	fold change	1.37
TRIOBP	11078	TRIO and F-actin binding protein	2 out of 4	116.218					63.1257	0.0101	fold change	1.25	53.0921	0.0298	fold change	-1.37
MAGI1	9223	membrane associated guanylate kinase, WW and PDZ domain containing 1	2 out of 4	116.209	55.3636	0.0076	fold change	1.26					60.845	0.0135	fold change	-1.45
PCDHGA10	56106	protocadherin gamma subfamily A, 10	2 out of 4	116.059	55.3636	0.0148	fold change	-1.26	60.6951	0.005	fold change	-1.24
EMSY	56946	chromosome 11 open reading frame 30	2 out of 4	116.037									51.0418	0.0069	fold change	-1.35	64.995	0.0064	fold change	-1.31
SLC9A5	6553	solute carrier family 9, subfamily A (NHE5, cation proton antiporter 5), member 5	2 out of 4	116.037									51.0418	0.0011	fold change	1.35	64.995	0.0445	fold change	1.31
FGD3	89846	FYVE, RhoGEF and PH domain containing 3	2 out of 4	116.037									51.0418	0.0119	fold change	-1.35	64.995	0.0167	fold change	-1.31
RARB	5915	retinoic acid receptor, beta	2 out of 4	115.918	45.4046	0.0286	fold change	-1.21									70.5129	0.0496	fold change	1.37
KDSR	2531	3-ketodihydrosphingosine reductase	2 out of 4	115.888									48.9093	0.0206	fold change	-1.33	66.9783	0.0073	fold change	-1.33
BG540494	NA		2 out of 4	115.888									48.9093	0.0314	fold change	-1.33	66.9783	0.002	fold change	-1.33
ZNF599	148103	zinc finger protein 599	2 out of 4	115.375					72.1272	0.0294	fold change	1.29	43.2477	0.0298	fold change	-1.28
KCNQ1OT1	10984	KCNQ1 opposite strand/antisense transcript 1 (non-protein coding)	2 out of 4	115.375					72.1272	0.0061	fold change	-1.29	43.2477	0.0372	fold change	-1.28
KLF3	51274	Kruppel-like factor 3 (basic)	2 out of 4	115.345									40.3119	0.0051	fold change	-1.25	75.0334	0.0031	fold change	-1.43
STX7	8417	syntaxin 7	2 out of 4	115.338									47.6209	0.0341	fold change	-1.32	67.7167	0.0109	fold change	-1.34
CTSC	1075	cathepsin C	2 out of 4	115.204									46.5038	0.0488	fold change	-1.31	68.7002	0.0081	fold change	-1.35
CTTNBP2	83992	cortactin binding protein 2	2 out of 4	114.947									53.0921	0.0039	fold change	-1.37	61.8552	0.0223	fold change	-1.28
CUEDC1	404093	CUE domain containing 1	2 out of 4	114.947									53.0921	0.001	fold change	-1.37	61.8552	0.0263	fold change	-1.28
Hs.193605.0.A1_3p_at	NA		2 out of 4	114.931					58.0026	0.0025	fold change	-1.23	56.9282	0.0161	fold change	-1.41
ARGLU1	55082	arginine and glutamate rich 1	2 out of 4	114.917									48.9093	0.0027	fold change	-1.33	66.0075	0.0388	fold change	-1.32
USP16	10600	ubiquitin specific peptidase 16	2 out of 4	114.713					55.1651	0.002	fold change	1.22					59.5479	0.0276	fold change	-1.26
LOC145663	145663	uncharacterized LOC145663	2 out of 4	114.614									44.1014	0.02	fold change	-1.29	70.5129	0.0243	fold change	-1.37
SOGA1	140710	suppressor of glucose, autophagy associated 1	2 out of 4	114.564	56.5611	0.0194	fold change	-1.27	58.0026	0.0105	fold change	-1.23
POLA1	5422	polymerase (DNA directed), alpha 1, catalytic subunit	2 out of 4	114.414									43.2477	0.0347	fold change	-1.28	71.1663	0.0233	fold change	-1.38
RB1	5925	retinoblastoma 1	2 out of 4	114.414									43.2477	0.0243	fold change	-1.28	71.1663	0.0394	fold change	-1.38
MCM3	4172	minichromosome maintenance complex component 3	2 out of 4	114.223					52.3681	0.0095	fold change	1.21					61.8552	0.0137	fold change	-1.28
TMEM107	84314	transmembrane protein 107	2 out of 4	114.21	56.5611	0.0446	fold change	1.27									57.6488	0.0164	fold change	1.24
RBL2	5934	retinoblastoma-like 2 (p130)	2 out of 4	113.979									52.1241	0.0013	fold change	-1.36	61.8552	0.0349	fold change	-1.28
ZBTB37	84614	zinc finger and BTB domain containing 37	2 out of 4	113.904									48.9093	0.0052	fold change	-1.33	64.995	0.0101	fold change	-1.31
PYCR3	65263	pyrroline-5-carboxylate reductase-like	2 out of 4	113.847									53.0921	0.0371	fold change	1.37	60.7548	0.0296	fold change	1.27
ATL2	64225	atlastin GTPase 2	2 out of 4	113.451	65.8302	0.0338	fold change	1.33					47.6209	0.0184	fold change	-1.32
CDC23	8697	cell division cycle 23 homolog (S. cerevisiae)	2 out of 4	113.366	55.3636	0.0001	fold change	1.26	58.0026	0.0004	fold change	1.23
PDE12	201626	phosphodiesterase 12	2 out of 4	113.366	55.3636	0.0491	fold change	1.26	58.0026	0.0151	fold change	1.23
PHTF2	57157	putative homeodomain transcription factor 2	2 out of 4	113.278	58.1125	0.0153	fold change	1.28	55.1651	0.0417	fold change	1.22
BROX	148362	BRO1 domain and CAAX motif containing	2 out of 4	113.123					52.3681	0.0052	fold change	1.21					60.7548	0.0127	fold change	-1.27
ZC3H6	376940	zinc finger CCCH-type containing 6	2 out of 4	113.028	49.9022	0.0148	fold change	1.23	63.1257	0.0052	fold change	1.25
CCDC47	57003	coiled-coil domain containing 47	2 out of 4	113.024	47.7874	0.0468	fold change	1.22	65.2367	0.0199	fold change	1.26
ELOVL5	60481	ELOVL fatty acid elongase 5	2 out of 4	112.819					60.6951	0.0352	fold change	-1.24	52.1241	0.0226	fold change	-1.36
MCM2	4171	minichromosome maintenance complex component 2	2 out of 4	112.814					55.1651	0.0147	fold change	1.22					57.6488	0.0436	fold change	1.24
NEO1	4756	neogenin 1	2 out of 4	112.803									43.2477	0.0111	fold change	-1.28	69.5555	0.0354	fold change	-1.36
FBXL3	26224	F-box and leucine-rich repeat protein 3	2 out of 4	112.803									43.2477	0.0264	fold change	-1.28	69.5555	0.0241	fold change	-1.36
SPAG9	9043	sperm associated antigen 9	2 out of 4	112.738									56.0456	0.0312	fold change	-1.4	56.6919	0.0212	fold change	-1.23
SCAMP1	9522	secretory carrier membrane protein 1	2 out of 4	112.69	67.4191	0.039	fold change	1.34					45.2706	0.0315	fold change	1.3
AVPR1A	552	arginine vasopressin receptor 1A	2 out of 4	112.616									47.6209	0.0391	fold change	1.32	64.995	0.0442	fold change	1.31
FAM169A	26049	family with sequence similarity 169, member A	2 out of 4	112.439	59.3465	0.0065	fold change	1.29					53.0921	0.0284	fold change	1.37
GABPB1-IT1	55056	uncharacterized protein FLJ10038	2 out of 4	112.292	55.3636	0.0167	fold change	1.26					56.9282	0.0102	fold change	1.41
RBMX	27316	RNA binding motif protein, X-linked	2 out of 4	112.019					75.6327	0.0075	fold change	1.31	36.3859	0.0189	fold change	-1.21
C10orf143	387723	uncharacterized LOC387723	2 out of 4	111.741					65.2367	0.0158	fold change	1.26	46.5038	0.0021	fold change	-1.31
CNTLN	54875	centlein, centrosomal protein	2 out of 4	111.726	56.5611	0.015	fold change	1.27	55.1651	0.0419	fold change	1.22
LOC100996740	100996740	uncharacterized LOC100996740	2 out of 4	111.715	59.3465	0.0064	fold change	1.29	52.3681	0.0271	fold change	1.21
VIPR1	7433	vasoactive intestinal peptide receptor 1	2 out of 4	111.689									37.3818	0.0145	fold change	1.22	74.3075	0.0317	fold change	1.42
RASGEF1A	221002	RasGEF domain family, member 1A	2 out of 4	111.661									41.1485	0.012	fold change	1.26	70.5129	0.0255	fold change	1.37
RNF168	165918	ring finger protein 168, E3 ubiquitin protein ligase	2 out of 4	111.571	42.8706	0.0377	fold change	1.2									68.7002	0.0328	fold change	-1.35
NBPF10	100132406	neuroblastoma breakpoint family, member 10	2 out of 4	111.503	47.7874	0.047	fold change	-1.22									63.7154	0.0207	fold change	1.3
TET2	54790	tet methylcytosine dioxygenase 2	2 out of 4	111.499									46.5038	0.0003	fold change	-1.31	64.995	0.0202	fold change	-1.31
CDC42SE1	56882	CDC42 small effector 1	2 out of 4	111.278									45.2706	0.018	fold change	-1.3	66.0075	0.0441	fold change	-1.32
ATAD2B	54454	ATPase family, AAA domain containing 2B	2 out of 4	111.26					70.1115	0.0305	fold change	1.28	41.1485	0.0018	fold change	-1.26
GNPTAB	79158	N-acetylglucosamine-1-phosphate transferase, alpha and beta subunits	2 out of 4	111.101	65.8302	0.0056	fold change	1.33					45.2706	0.0118	fold change	1.3
IRS1	3667	insulin receptor substrate 1	2 out of 4	110.853	72.4669	0.0311	fold change	1.38					38.3859	0.041	fold change	1.23
ASAH1	427	N-acylsphingosine amidohydrolase (acid ceramidase) 1	2 out of 4	110.704									41.1485	0.0482	fold change	-1.26	69.5555	0.0496	fold change	-1.36
DCT	1638	dopachrome tautomerase	2 out of 4	110.677									49.9226	0.0046	fold change	1.34	60.7548	0.0259	fold change	1.27
ZNF230	7773	zinc finger protein 230	2 out of 4	110.657	49.9022	0.0256	fold change	1.23									60.7548	0.0318	fold change	1.27
SRP72	6731	signal recognition particle 72kDa	2 out of 4	110.641	45.4046	0.0354	fold change	1.21	65.2367	0.024	fold change	1.26
ZFP41	286128	zinc finger protein 41 homolog (mouse)	2 out of 4	110.641	45.4046	0.0408	fold change	-1.21	65.2367	0.0008	fold change	-1.26
LINC00967	100505659	uncharacterized LOC100505659	2 out of 4	110.624	42.8706	0.0067	fold change	-1.2	67.7534	0.0011	fold change	-1.27
PAK2	5062	p21 protein (Cdc42/Rac)-activated kinase 2	2 out of 4	110.392									47.6209	0.0422	fold change	-1.32	62.7715	0.0262	fold change	-1.29
DNM2	1785	dynamin 2	2 out of 4	110.392									47.6209	0.0068	fold change	-1.32	62.7715	0.0237	fold change	-1.29
ZCCHC11	23318	zinc finger, CCHC domain containing 11	2 out of 4	110.365									37.3818	0.0151	fold change	-1.22	72.9831	0.0437	fold change	-1.4
CHD1L	9557	chromodomain helicase DNA binding protein 1-like	2 out of 4	110.266									45.2706	0.0007	fold change	-1.3	64.995	0.0315	fold change	-1.31
PPP2R5E	5529	protein phosphatase 2, regulatory subunit B', epsilon isoform	2 out of 4	109.8	71.4143	0.0213	fold change	1.37					38.3859	0.0355	fold change	1.23
SERINC5	256987	serine incorporator 5	2 out of 4	109.737									51.0418	0.0156	fold change	-1.35	58.6951	0.0128	fold change	-1.25
ZCCHC6	79670	zinc finger, CCHC domain containing 6	2 out of 4	109.737									51.0418	0.0019	fold change	-1.35	58.6951	0.0377	fold change	-1.25
FAM21EP	100421577	family with sequence similarity 21, member A pseudogene	2 out of 4	109.732									39.2188	0.0352	fold change	1.24	70.5129	0.0072	fold change	1.37
KLF13	51621	Kruppel-like factor 13	2 out of 4	109.732									39.2188	0.0112	fold change	-1.24	70.5129	0.0228	fold change	-1.37
VASH1	22846	vasohibin 1	2 out of 4	109.664									48.9093	0.0305	fold change	-1.33	60.7548	0.0387	fold change	-1.27
CLDN15	24146	claudin 15	2 out of 4	109.664									48.9093	0.0056	fold change	-1.33	60.7548	0.0259	fold change	-1.27
CENPJ	55835	centromere protein J	2 out of 4	109.618									53.9782	0.0104	fold change	-1.38	55.6396	0.0079	fold change	-1.22
HNRNPU	3192	heterogeneous nuclear ribonucleoprotein U (scaffold attachment factor A)	2 out of 4	109.584	67.4191	0.0075	fold change	1.34					42.1649	0.0356	fold change	-1.27
CARHSP1	23589	calcium regulated heat stable protein 1, 24kDa	2 out of 4	109.552	45.4046	0.0371	fold change	-1.21					64.147	0.0101	fold change	-1.49
WDR27	253769	WD repeat domain 27	2 out of 4	109.471									49.9226	0.0016	fold change	-1.34	59.5479	0.0117	fold change	-1.26
GLIPR2	152007	GLI pathogenesis-related 2	2 out of 4	109.33					70.1115	0.0339	fold change	1.28	39.2188	0.025	fold change	-1.24
KLHL24	54800	kelch-like 24 (Drosophila)	2 out of 4	109.296					52.3681	0.0404	fold change	-1.21	56.9282	0.0037	fold change	-1.41
C9orf3	84909	chromosome 9 open reading frame 3	2 out of 4	109.275									46.5038	0.0011	fold change	-1.31	62.7715	0.0287	fold change	-1.29
RPRD1A	55197	regulation of nuclear pre-mRNA domain containing 1A	2 out of 4	109.255									43.2477	0.0309	fold change	-1.28	66.0075	0.038	fold change	-1.32
HR	55806	hairless homolog (mouse)	2 out of 4	108.709	49.9022	0.0348	fold change	-1.23					58.8069	0.0216	fold change	-1.43
Hs.661597	NA		2 out of 4	108.691									51.0418	0.0058	fold change	-1.35	57.6488	0.0382	fold change	-1.24
ADGRV1	84059	G protein-coupled receptor 98	2 out of 4	108.628									53.9782	0.0489	fold change	1.38	54.6502	0.0197	fold change	1.21
DMTF1	9988	cyclin D binding myb-like transcription factor 1	2 out of 4	108.618									49.9226	0.0089	fold change	-1.34	58.6951	0.0109	fold change	-1.25
BRWD1	54014	bromodomain and WD repeat domain containing 1	2 out of 4	108.466	60.845	0.0481	fold change	1.3					47.6209	0.0028	fold change	-1.32
BC036577	NA		2 out of 4	108.457									48.9093	0.0001	fold change	1.33	59.5479	0.034	fold change	1.26
BF059276	NA		2 out of 4	108.457									48.9093	0.0194	fold change	1.33	59.5479	0.029	fold change	1.26
SLTM	79811	SAFB-like, transcription modulator	2 out of 4	108.376									47.6209	0.012	fold change	-1.32	60.7548	0.0332	fold change	-1.27
AGO3	192669	eukaryotic translation initiation factor 2C, 3	2 out of 4	108.376									47.6209	0.0006	fold change	-1.32	60.7548	0.001	fold change	-1.27
EIF3D	8664	eukaryotic translation initiation factor 3, subunit D	2 out of 4	108.282									35.2993	0.0233	fold change	-1.2	72.9831	0.0178	fold change	-1.4
USP6NL	9712	USP6 N-terminal like	2 out of 4	108.257					55.1651	0.0499	fold change	1.22	53.0921	0.0271	fold change	1.37
BCLAF3	256643	chromosome X open reading frame 23	2 out of 4	108.065					67.7534	0.0059	fold change	1.27	40.3119	0.0044	fold change	1.25
BF063236	NA		2 out of 4	107.895									37.3818	0.0094	fold change	1.22	70.5129	0.0102	fold change	1.37
ARHGEF28	64283	Rho guanine nucleotide exchange factor (GEF) 28	2 out of 4	107.882	62.6111	0.0325	fold change	1.31					45.2706	0.0125	fold change	1.3
FLT4	2324	fms-related tyrosine kinase 4	2 out of 4	107.873	58.1125	0.0052	fold change	-1.28	49.7607	0.0387	fold change	-1.2
SMARCA2	6595	SWI/SNF related, matrix associated, actin dependent regulator of chromatin, subfamily a, member 2	2 out of 4	107.811	53.161	0.0349	fold change	1.25									54.6502	0.0493	fold change	1.21
PIK3CA	5290	phosphatidylinositol-4,5-bisphosphate 3-kinase, catalytic subunit alpha	2 out of 4	107.8	71.4143	0.0248	fold change	1.37					36.3859	0.0246	fold change	1.21
CENPS	378708	apoptosis-inducing, TAF9-like domain 1	2 out of 4	107.734									51.0418	0.0438	fold change	1.35	56.6919	0.0238	fold change	1.23
LRRC57	255252	leucine rich repeat containing 57	2 out of 4	107.666	51.6204	0.0157	fold change	1.24					56.0456	0.0248	fold change	1.4
EML4	27436	echinoderm microtubule associated protein like 4	2 out of 4	107.571									49.9226	0.0265	fold change	1.34	57.6488	0.0275	fold change	1.24
ARHGAP32	9743	Rho GTPase activating protein 32	2 out of 4	107.413	70.031	0.0334	fold change	1.36					37.3818	0.0124	fold change	1.22
ANAPC16	119504	anaphase promoting complex subunit 16	2 out of 4	107.289					55.1651	0.0113	fold change	-1.22	52.1241	0.0248	fold change	-1.36
DNMT3A	1788	DNA (cytosine-5-)-methyltransferase 3 alpha	2 out of 4	107.199					60.6951	0.0064	fold change	1.24	46.5038	0.0131	fold change	-1.31
BBIP1	92482	BBSome interacting protein 1	2 out of 4	107.199					60.6951	0.0142	fold change	1.24	46.5038	0.0001	fold change	-1.31
EXOSC8	11340	exosome component 8	2 out of 4	107.16									42.1649	0.0018	fold change	-1.27	64.995	0.015	fold change	-1.31
FHL1	2273	four and a half LIM domains 1	2 out of 4	107.139	53.161	0.0421	fold change	1.25					53.9782	0.0433	fold change	1.38
MUTYH	4595	mutY homolog (E. coli)	2 out of 4	106.963									43.2477	0.0228	fold change	-1.28	63.7154	0.0057	fold change	-1.3
RIF1	55183	RAP1 interacting factor homolog (yeast)	2 out of 4	106.873									44.1014	0.0037	fold change	-1.29	62.7715	0.0317	fold change	-1.29
CACNA1D	776	calcium channel, voltage-dependent, L type, alpha 1D subunit	2 out of 4	106.373					63.1257	0.0338	fold change	-1.25	43.2477	0.0157	fold change	1.28
AI659439	NA		2 out of 4	106.116	60.845	0.0479	fold change	-1.3					45.2706	0.0119	fold change	-1.3
LIMS1	3987	LIM and senescent cell antigen-like domains 1	2 out of 4	106.019									43.2477	0.0227	fold change	-1.28	62.7715	0.0439	fold change	-1.29
LLGL1	3996	lethal giant larvae homolog 1 (Drosophila)	2 out of 4	105.941									36.3859	0.013	fold change	-1.21	69.5555	0.0098	fold change	-1.36
TMEM108	66000	transmembrane protein 108	2 out of 4	105.88									42.1649	0.0158	fold change	1.27	63.7154	0.0238	fold change	1.3
AW136338	NA		2 out of 4	105.529	53.161	0.0038	fold change	-1.25	52.3681	0.0458	fold change	-1.21
ANKHD1	54882	ankyrin repeat and KH domain containing 1	2 out of 4	105.4					49.7607	0.0275	fold change	1.2					55.6396	0.0323	fold change	-1.22
MAX	4149	MYC associated factor X	2 out of 4	105.364									38.3859	0.0055	fold change	-1.23	66.9783	0.0109	fold change	-1.33
TNIP2	79155	TNFAIP3 interacting protein 2	2 out of 4	105.199									46.5038	0.0224	fold change	-1.31	58.6951	0.0488	fold change	-1.25
RPS8	6202	ribosomal protein S8	2 out of 4	105.086									36.3859	0.0281	fold change	1.21	68.7002	0.0201	fold change	1.35
CD6	923	CD6 molecule	2 out of 4	105.067	49.9022	0.0069	fold change	-1.23	55.1651	0.001	fold change	-1.22
AI434790	NA		2 out of 4	105.067	49.9022	0.0244	fold change	-1.23	55.1651	0.0184	fold change	-1.22
HIC1	3090	hypermethylated in cancer 1	2 out of 4	105.049	65.8302	0.0084	fold change	-1.33					39.2188	0.0196	fold change	-1.24
MAT2A	4144	methionine adenosyltransferase II, alpha	2 out of 4	104.936									42.1649	0.0354	fold change	-1.27	62.7715	0.0205	fold change	-1.29
FOXN3	1112	forkhead box N3	2 out of 4	104.856									44.1014	0.0341	fold change	-1.29	60.7548	0.0434	fold change	-1.27
CRLS1	54675	cardiolipin synthase 1	2 out of 4	104.492					52.3681	0.0436	fold change	1.21	52.1241	0.0478	fold change	1.36
CRYZL1	9946	crystallin, zeta (quinone reductase)-like 1	2 out of 4	104.393									38.3859	0.0205	fold change	-1.23	66.0075	0.0139	fold change	-1.32
STAMBPL1	57559	STAM binding protein-like 1	2 out of 4	104.273	55.3636	0.0236	fold change	1.26					48.9093	0.0337	fold change	1.33
KIF6	221458	kinesin family member 6	2 out of 4	104.216	65.8302	0.013	fold change	-1.33					38.3859	0.0271	fold change	-1.23
MTMR10	54893	myotubularin related protein 10	2 out of 4	104.212	45.4046	0.0024	fold change	-1.21					58.8069	0.0099	fold change	-1.43
FAM50A	9130	family with sequence similarity 50, member A	2 out of 4	104.153									46.5038	0.0071	fold change	-1.31	57.6488	0.0376	fold change	-1.24
SGCB	6443	sarcoglycan, beta (43kDa dystrophin-associated glycoprotein)	2 out of 4	104.139					67.7534	0.0227	fold change	1.27	36.3859	0.0361	fold change	-1.21
PSMB8	5696	proteasome (prosome, macropain) subunit, beta type, 8 (large multifunctional peptidase 7)	2 out of 4	104.103									36.3859	0.0327	fold change	-1.21	67.7167	0.0419	fold change	-1.34
IBA57	200205	IBA57, iron-sulfur cluster assembly homolog (S. cerevisiae)	2 out of 4	104.1	45.4046	0.0302	fold change	-1.21									58.6951	0.0469	fold change	-1.25
HEXB	3074	hexosaminidase B (beta polypeptide)	2 out of 4	104.027									40.3119	0.0445	fold change	-1.25	63.7154	0.0429	fold change	-1.3
BF246855	NA		2 out of 4	104.02									42.1649	0.0041	fold change	-1.27	61.8552	0.0491	fold change	-1.28
NUDT4B	440672	nudix (nucleoside diphosphate linked moiety X)-type motif 4 pseudogene 1	2 out of 4	104.003									43.2477	0.0208	fold change	-1.28	60.7548	0.0008	fold change	-1.27
TRIM13	10206	tripartite motif containing 13	2 out of 4	103.988	51.6204	0.0002	fold change	1.24	52.3681	0.0039	fold change	1.21
SYMPK	8189	symplekin	2 out of 4	103.649									44.1014	0.0337	fold change	-1.29	59.5479	0.0461	fold change	1.26
ZNF362	149076	zinc finger protein 362	2 out of 4	103.566	42.8706	0.0358	fold change	-1.2	60.6951	0.0139	fold change	-1.24
AA424811	NA		2 out of 4	103.448	59.3465	0.012	fold change	-1.29					44.1014	0.0054	fold change	-1.29
AIMP1	9255	aminoacyl tRNA synthetase complex-interacting multifunctional protein 1	2 out of 4	103.438					63.1257	0.0324	fold change	1.25	40.3119	0.0084	fold change	-1.25
NPPB	4879	natriuretic peptide B	2 out of 4	103.381									38.3859	0.0046	fold change	1.23	64.995	0.0175	fold change	1.31
INVS	27130	inversin	2 out of 4	103.083									40.3119	0.0436	fold change	-1.25	62.7715	0.0439	fold change	-1.29
LINC00958	100506305	uncharacterized LOC100506305	2 out of 4	103.004									41.1485	0.026	fold change	-1.26	61.8552	0.026	fold change	-1.28
NEK9	91754	NIMA (never in mitosis gene a)- related kinase 9	2 out of 4	103.004									41.1485	0.0116	fold change	-1.26	61.8552	0.0424	fold change	-1.28
KRCC1	51315	lysine-rich coiled-coil 1	2 out of 4	103.004									41.1485	0.0491	fold change	-1.26	61.8552	0.0185	fold change	-1.28
PGP	283871	phosphoglycolate phosphatase	2 out of 4	103.004									41.1485	0.0256	fold change	1.26	61.8552	0.0281	fold change	1.28
PGBD2	267002	piggyBac transposable element derived 2	2 out of 4	102.994	49.9022	0.0198	fold change	-1.23					53.0921	0.0105	fold change	-1.37
AHCTF1	25909	AT hook containing transcription factor 1	2 out of 4	102.984	55.3636	0.0228	fold change	1.26					47.6209	0.0246	fold change	-1.32
ZCCHC17	51538	zinc finger, CCHC domain containing 17	2 out of 4	102.923	62.6111	0.0023	fold change	1.31					40.3119	0.0048	fold change	1.25
EDEM2	55741	ER degradation enhancer, mannosidase alpha-like 2	2 out of 4	102.377									37.3818	0.0133	fold change	-1.22	64.995	0.0253	fold change	-1.31
NUMA1	4926	nuclear mitotic apparatus protein 1	2 out of 4	102.271									47.6209	0.0065	fold change	-1.32	54.6502	0.0439	fold change	-1.21
TMEM87A	25963	transmembrane protein 87A	2 out of 4	102.167									40.3119	0.0389	fold change	-1.25	61.8552	0.0382	fold change	-1.28
LRRC8D	55144	leucine rich repeat containing 8 family, member D	2 out of 4	102.101									38.3859	0.0416	fold change	-1.23	63.7154	0.0418	fold change	-1.3
ADAM10	102	ADAM metallopeptidase domain 10	2 out of 4	102.101									38.3859	0.0238	fold change	-1.23	63.7154	0.045	fold change	-1.3
DAAM1	23002	dishevelled associated activator of morphogenesis 1	2 out of 4	101.766	47.7874	0.0488	fold change	1.22					53.9782	0.0205	fold change	1.38
SSH3	54961	slingshot homolog 3 (Drosophila)	2 out of 4	101.75									44.1014	0.0015	fold change	-1.29	57.6488	0.0144	fold change	-1.24
XPC	7508	xeroderma pigmentosum, complementation group C	2 out of 4	101.75									44.1014	0.0009	fold change	-1.29	57.6488	0.046	fold change	-1.24
RCC1L	81554	Williams-Beuren syndrome chromosome region 16	2 out of 4	101.75									44.1014	0.005	fold change	-1.29	57.6488	0.0165	fold change	-1.24
INTS4	92105	integrator complex subunit 4	2 out of 4	101.713									42.1649	0.0007	fold change	-1.27	59.5479	0.0195	fold change	-1.26
KIAA1755	85449	KIAA1755	2 out of 4	101.669					55.1651	0.0039	fold change	-1.22	46.5038	0.0367	fold change	-1.31
HFE	3077	hemochromatosis	2 out of 4	101.381									36.3859	0.0304	fold change	1.21	64.995	0.0485	fold change	1.31
METAP2	10988	methionyl aminopeptidase 2	2 out of 4	101.277					52.3681	0.0373	fold change	1.21	48.9093	0.0169	fold change	1.33
MRPL30	51263	mitochondrial ribosomal protein L30	2 out of 4	101.25					58.0026	0.0214	fold change	-1.23	43.2477	0.0089	fold change	1.28
RPL5	6125	ribosomal protein L5	2 out of 4	101.157									38.3859	0.0006	fold change	-1.23	62.7715	0.0281	fold change	-1.29
ADD2	119	adducin 2 (beta)	2 out of 4	101.154									46.5038	0.0062	fold change	1.31	54.6502	0.0318	fold change	1.21
CTCF	10664	CCCTC-binding factor (zinc finger protein)	2 out of 4	101.097									37.3818	0.0188	fold change	-1.22	63.7154	0.0187	fold change	-1.3
ST7L	54879	suppression of tumorigenicity 7 like	2 out of 4	101.044	45.4046	0.0357	fold change	1.21									55.6396	0.0201	fold change	-1.22
COL27A1	85301	collagen, type XXVII, alpha 1	2 out of 4	101.044	45.4046	0.0479	fold change	-1.21									55.6396	0.0174	fold change	-1.22
NFIB	4781	nuclear factor I/B	2 out of 4	101.007					60.6951	0.0296	fold change	1.24	40.3119	0.0225	fold change	1.25
ZNF24	7572	zinc finger protein 24	2 out of 4	100.91									45.2706	0.0038	fold change	-1.3	55.6396	0.0265	fold change	-1.22
PPP1R15B	84919	protein phosphatase 1, regulatory subunit 15B	2 out of 4	100.86									42.1649	0.0272	fold change	-1.27	58.6951	0.0187	fold change	-1.25
ZSCAN9	7746	zinc finger protein 193	2 out of 4	100.86									42.1649	0.0372	fold change	-1.27	58.6951	0.0432	fold change	-1.25
T86159	NA		2 out of 4	100.86									42.1649	0.0115	fold change	-1.27	58.6951	0.0249	fold change	-1.25
USP42	84132	ubiquitin specific peptidase 42	2 out of 4	100.793									44.1014	0.0127	fold change	1.29	56.6919	0.0187	fold change	1.23
METTL14	57721	methyltransferase like 14	2 out of 4	100.663	56.5611	0.0241	fold change	1.27					44.1014	0.0299	fold change	-1.29
TBC1D27P	96597	TBC1 domain family, member 27	2 out of 4	100.57	45.4046	0.0232	fold change	-1.21	55.1651	0.0116	fold change	-1.22
AB062477	NA		2 out of 4	100.57	45.4046	0.0358	fold change	-1.21	55.1651	0.0117	fold change	-1.22
MIS12	79003	MIS12, MIND kinetochore complex component, homolog (S. pombe)	2 out of 4	100.436					55.1651	0.0382	fold change	1.22	45.2706	0.0473	fold change	-1.3
SREK1IP1	285672	SREK1-interacting protein 1	2 out of 4	100.323	45.4046	0.0164	fold change	1.21					54.9185	0.0122	fold change	1.39
TEX44	165100	chromosome 2 open reading frame 57	2 out of 4	100.156	47.7874	0.0058	fold change	-1.22	52.3681	0.0086	fold change	-1.21
KIF16B	55614	kinesin family member 16B	2 out of 4	100.153									37.3818	0.0015	fold change	-1.22	62.7715	0.0422	fold change	-1.29
FUS	2521	fused in sarcoma	2 out of 4	100.101									36.3859	0.0213	fold change	1.21	63.7154	0.0287	fold change	1.3
NCOA3	8202	nuclear receptor coactivator 3	2 out of 4	100.101									36.3859	0.0203	fold change	-1.21	63.7154	0.0276	fold change	-1.3
LOC100128751	100128751	INM04	2 out of 4	99.9396									43.2477	0.035	fold change	-1.28	56.6919	0.0444	fold change	-1.23
PDE5A	8654	phosphodiesterase 5A, cGMP-specific	2 out of 4	99.9396									43.2477	0.0344	fold change	-1.28	56.6919	0.0497	fold change	1.23
MAP6	4135	microtubule-associated protein 6	2 out of 4	99.9138					60.6951	0.0372	fold change	-1.24	39.2188	0.0362	fold change	1.24
HSD17B4	3295	hydroxysteroid (17-beta) dehydrogenase 4	2 out of 4	99.8598									40.3119	0.0177	fold change	-1.25	59.5479	0.0281	fold change	-1.26
NCL	4691	nucleolin	2 out of 4	99.8598									40.3119	0.0253	fold change	-1.25	59.5479	0.0413	fold change	-1.26
LNX2	222484	ligand of numb-protein X 2	2 out of 4	99.8248	49.9022	0.0059	fold change	1.23					49.9226	0.0177	fold change	1.34
PSME4	23198	proteasome (prosome, macropain) activator subunit 4	2 out of 4	99.8138									42.1649	0.0008	fold change	-1.27	57.6488	0.045	fold change	-1.24
UBE2W	55284	ubiquitin-conjugating enzyme E2W (putative)	2 out of 4	99.6648	53.161	0.0175	fold change	1.25					46.5038	0.0197	fold change	1.31
AK096064	NA		2 out of 4	99.6628	49.9022	0.0117	fold change	-1.23	49.7607	0.0181	fold change	-1.2
TPMT	7172	thiopurine S-methyltransferase	2 out of 4	99.6628	49.9022	0.0179	fold change	1.23	49.7607	0.0111	fold change	1.2
TOM1L1	10040	target of myb1 (chicken)-like 1	2 out of 4	99.3828	45.4046	0.0325	fold change	1.21					53.9782	0.0125	fold change	1.38
CHD2	1106	chromodomain helicase DNA binding protein 2	2 out of 4	99.2665					55.1651	0.0289	fold change	1.22	44.1014	0.0368	fold change	-1.29
CRHR1	1394	corticotropin releasing hormone receptor 1	2 out of 4	99.2369									37.3818	0.0215	fold change	1.22	61.8552	0.0163	fold change	1.28
C10orf25	220979	chromosome 10 open reading frame 25	2 out of 4	99.2369									37.3818	0.0288	fold change	-1.22	61.8552	0.0481	fold change	-1.28
FAHD2CP	729234	fumarylacetoacetate hydrolase domain containing 2C, pseudogene	2 out of 4	99.1574									36.3859	0.0111	fold change	-1.21	62.7715	0.0299	fold change	-1.29
AI813489	NA		2 out of 4	99.0069									40.3119	0.0086	fold change	-1.25	58.6951	0.0074	fold change	-1.25
AZIN1	51582	antizyme inhibitor 1	2 out of 4	98.8719					52.3681	0.0415	fold change	1.21	46.5038	0.0331	fold change	1.31
TLCD1	116238	TLC domain containing 1	2 out of 4	98.8568									42.1649	0.0105	fold change	1.27	56.6919	0.0401	fold change	1.23
HIP1R	9026	huntingtin interacting protein 1 related	2 out of 4	98.8115	49.9022	0.0336	fold change	-1.23					48.9093	0.0123	fold change	-1.33
ZNF224	7767	zinc finger protein 224	2 out of 4	98.4128					55.1651	0.0351	fold change	-1.22	43.2477	0.049	fold change	-1.28
COMT	1312	catechol-O-methyltransferase	2 out of 4	98.241									36.3859	0.008	fold change	-1.21	61.8552	0.0148	fold change	-1.28
SLF2	55719	family with sequence similarity 178, member A	2 out of 4	98.241									36.3859	0.0429	fold change	-1.21	61.8552	0.03	fold change	-1.28
ADGRB1	575	brain-specific angiogenesis inhibitor 1	2 out of 4	98.1366									37.3818	0.0459	fold change	1.22	60.7548	0.0224	fold change	1.27
ETFA	2108	electron-transfer-flavoprotein, alpha polypeptide	2 out of 4	98.0357	42.8706	0.0452	fold change	1.2	55.1651	0.0209	fold change	1.22
DUOX1	53905	dual oxidase 1	2 out of 4	97.9607									40.3119	0.0037	fold change	-1.25	57.6488	0.0316	fold change	-1.24
MAP7	9053	microtubule-associated protein 7	2 out of 4	97.9607									40.3119	0.0353	fold change	-1.25	57.6488	0.0274	fold change	-1.24
VPS54	51542	vacuolar protein sorting 54 homolog (S. cerevisiae)	2 out of 4	97.9339									38.3859	0.0026	fold change	-1.23	59.5479	0.011	fold change	-1.26
GALNT13	114805	UDP-N-acetyl-alpha-D-galactosamine:polypeptide N-acetylgalactosaminyltransferase 13 (GalNAc-T13)	2 out of 4	97.8979									43.2477	0.0388	fold change	-1.28	54.6502	0.02	fold change	-1.21
TRMT1L	81627	tRNA methyltransferase 1 homolog (S. cerevisiae)-like	2 out of 4	97.7727	45.4046	0.0384	fold change	1.21	52.3681	0.0208	fold change	1.21
FGFRL1	53834	fibroblast growth factor receptor-like 1	2 out of 4	97.7727	45.4046	0.0442	fold change	-1.21	52.3681	0.0444	fold change	-1.21
ZMYM6	9204	zinc finger, MYM-type 6	2 out of 4	97.6387					52.3681	0.0274	fold change	1.21	45.2706	0.0443	fold change	-1.3
PEX19	5824	peroxisomal biogenesis factor 19	2 out of 4	97.5481	47.7874	0.0272	fold change	1.22	49.7607	0.017	fold change	1.2
STAT3	6774	signal transducer and activator of transcription 3 (acute-phase response factor)	2 out of 4	97.5287	45.4046	0.0395	fold change	-1.21					52.1241	0.008	fold change	-1.36
MBP	4155	myelin basic protein	2 out of 4	97.5285	55.3636	0.0139	fold change	-1.26					42.1649	0.0472	fold change	-1.27
ACTR3C	653857	ARP3 actin-related protein 3 homolog C (yeast)	2 out of 4	97.1544									35.2993	0.0176	fold change	1.2	61.8552	0.048	fold change	1.28
CAPN9	10753	calpain 9	2 out of 4	97.1407									36.3859	0.0019	fold change	-1.21	60.7548	0.0249	fold change	-1.27
TCHP	84260	trichoplein, keratin filament binding	2 out of 4	96.8151									42.1649	0.006	fold change	-1.27	54.6502	0.0114	fold change	-1.21
CCDC32	90416	chromosome 15 open reading frame 57	2 out of 4	96.3886					58.0026	0.0034	fold change	-1.23	38.3859	0.0252	fold change	1.23
RBM8A	9939	RNA binding motif protein 8A	2 out of 4	96.3136					55.1651	0.0469	fold change	1.22	41.1485	0.0372	fold change	-1.26
EFCAB14	9813	KIAA0494	2 out of 4	96.0769									37.3818	0.0011	fold change	-1.22	58.6951	0.0062	fold change	-1.25
NUBP1	4682	nucleotide binding protein 1	2 out of 4	96.0541									35.2993	0.017	fold change	-1.2	60.7548	0.0339	fold change	-1.27
FLII	2314	flightless I homolog (Drosophila)	2 out of 4	96.0541									35.2993	0.0126	fold change	-1.2	60.7548	0.0065	fold change	-1.27
RALGAPA1	253959	Ral GTPase activating protein, alpha subunit 1 (catalytic)	2 out of 4	96.0348									38.3859	0.0272	fold change	-1.23	57.6488	0.0205	fold change	-1.24
UBALD1	124402	family with sequence similarity 100, member A	2 out of 4	95.9338									36.3859	0.0398	fold change	-1.21	59.5479	0.0391	fold change	-1.26
KIF4A	24137	kinesin family member 4A	2 out of 4	95.9107									39.2188	0.0043	fold change	-1.24	56.6919	0.049	fold change	-1.23
AI805700	NA		2 out of 4	95.7218	51.6204	0.0292	fold change	-1.24					44.1014	0.0067	fold change	-1.29
BRD8	10902	bromodomain containing 8	2 out of 4	95.477					55.1651	0.0219	fold change	-1.22	40.3119	0.0023	fold change	-1.25
FTCD	10841	formiminotransferase cyclodeaminase	2 out of 4	95.3844					58.0026	0.0021	fold change	-1.23	37.3818	0.0345	fold change	-1.22
SLC19A1	6573	solute carrier family 19 (folate transporter), member 1	2 out of 4	95.2387	42.8706	0.018	fold change	-1.2	52.3681	0.0369	fold change	-1.21
ZNF223	7766	zinc finger protein 223	2 out of 4	94.4984	58.1125	0.0143	fold change	1.28					36.3859	0.0092	fold change	1.21
ACSL3	2181	acyl-CoA synthetase long-chain family member 3	2 out of 4	94.3839					55.1651	0.0278	fold change	1.22	39.2188	0.0213	fold change	1.24
TRAM2	9697	translocation associated membrane protein 2	2 out of 4	94.3139	45.4046	0.0205	fold change	-1.21					48.9093	0.0266	fold change	-1.33
KDELR2	11014	KDEL (Lys-Asp-Glu-Leu) endoplasmic reticulum protein retention receptor 2	2 out of 4	93.9944									35.2993	0.0007	fold change	-1.2	58.6951	0.0415	fold change	-1.25
IWS1	55677	IWS1 homolog (S. cerevisiae)	2 out of 4	93.9944									35.2993	0.0019	fold change	-1.2	58.6951	0.0024	fold change	-1.25
FBXO4	26272	F-box protein 4	2 out of 4	93.3019					58.0026	0.0052	fold change	1.23	35.2993	0.041	fold change	1.2
ARHGAP42	143872	Rho GTPase activating protein 42	2 out of 4	93.0361									38.3859	0.0085	fold change	-1.23	54.6502	0.0202	fold change	-1.21
DOCK1	1793	dedicator of cytokinesis 1	2 out of 4	93.0255	45.4046	0.039	fold change	-1.21					47.6209	0.0472	fold change	-1.32
BF447878	NA		2 out of 4	93.0214									37.3818	0.0117	fold change	-1.22	55.6396	0.014	fold change	-1.22
MED11	400569	mediator complex subunit 11	2 out of 4	92.032									37.3818	0.0137	fold change	-1.22	54.6502	0.0022	fold change	-1.21
UPF3A	65110	UPF3 regulator of nonsense transcripts homolog A (yeast)	2 out of 4	92.0255									36.3859	0.039	fold change	-1.21	55.6396	0.0048	fold change	-1.22
RNF14	9604	ring finger protein 14	2 out of 4	91.9256					49.7607	0.0095	fold change	1.2	42.1649	0.0484	fold change	1.27
UACA	55075	uveal autoantigen with coiled-coil domains and ankyrin repeats	2 out of 4	91.9256					49.7607	0.0234	fold change	-1.2	42.1649	0.004	fold change	-1.27
RREB1	6239	ras responsive element binding protein 1	2 out of 4	91.8889	47.7874	0.0266	fold change	-1.22					44.1014	0.0314	fold change	-1.29
DCUN1D5	84259	DCN1, defective in cullin neddylation 1, domain containing 5 (S. cerevisiae)	2 out of 4	91.7799	42.8706	0.0413	fold change	1.2					48.9093	0.0354	fold change	1.33
LOC400927	400927	TPTE and PTEN homologous inositol lipid phosphatase pseudogene	2 out of 4	91.7495	55.3636	0.0123	fold change	-1.26					36.3859	0.0088	fold change	-1.21
PPP1R21	129285	protein phosphatase 1, regulatory subunit 21	2 out of 4	91.036									36.3859	0.0163	fold change	-1.21	54.6502	0.0305	fold change	-1.21
MFN1	55669	mitofusin 1	2 out of 4	90.754					52.3681	0.0423	fold change	1.21	38.3859	0.0311	fold change	-1.23
WDR33	55339	WD repeat domain 33	2 out of 4	90.0063	51.6204	0.0185	fold change	1.24					38.3859	0.0386	fold change	-1.23
IRF2	3660	interferon regulatory factor 2	2 out of 4	89.9873									36.3859	0.0109	fold change	-1.21	53.6015	0.0464	fold change	-1.2
ZNF850	342892	zinc finger protein 850	2 out of 4	89.9495									35.2993	0.0056	fold change	1.2	54.6502	0.0211	fold change	1.21
BC012026	NA		2 out of 4	89.5468	53.161	0.018	fold change	-1.25					36.3859	0.0017	fold change	-1.21
TEF	7008	thyrotrophic embryonic factor	2 out of 4	89.0021	51.6204	0.0317	fold change	1.24					37.3818	0.0002	fold change	-1.22
C17orf51	339263	chromosome 17 open reading frame 51	2 out of 4	88.936	47.7874	0.0289	fold change	-1.22					41.1485	0.0015	fold change	1.26
SHB	6461	Src homology 2 domain containing adaptor protein B	2 out of 4	87.5695	45.4046	0.0119	fold change	-1.21					42.1649	0.0289	fold change	-1.27
AL831879	NA		2 out of 4	87.5695	45.4046	0.0034	fold change	-1.21					42.1649	0.0472	fold change	-1.27
ANGEL2	90806	angel homolog 2 (Drosophila)	2 out of 4	87.284	49.9022	0.0458	fold change	1.23					37.3818	0.0148	fold change	1.22
ARL16	339231	ADP-ribosylation factor-like 16	2 out of 4	86.5531	45.4046	0.0239	fold change	1.21					41.1485	0.0243	fold change	1.26
SFSWAP	6433	splicing factor, suppressor of white-apricot homolog (Drosophila)	2 out of 4	86.1734	47.7874	0.0191	fold change	-1.22					38.3859	0.0043	fold change	-1.23
COX10	1352	COX10 homolog, cytochrome c oxidase assembly protein, heme A: farnesyltransferase (yeast)	2 out of 4	86.1465					49.7607	0.0378	fold change	-1.2	36.3859	0.0277	fold change	1.21
ZNF131	7690	zinc finger protein 131	2 out of 4	86.1183	42.8706	0.0134	fold change	1.2					43.2477	0.0038	fold change	-1.28
FGFR1OP	11116	FGFR1 oncogene partner	2 out of 4	85.2015	49.9022	0.0075	fold change	1.23					35.2993	0.0227	fold change	1.2
AK021594	NA		2 out of 4	85.1692	47.7874	0.0101	fold change	-1.22					37.3818	0.0105	fold change	1.22
FSD1L	83856	fibronectin type III and SPRY domain containing 1-like	2 out of 4	84.6234	45.4046	0.0226	fold change	1.21					39.2188	0.0281	fold change	1.24
ZER1	10444	zer-1 homolog (C. elegans)	2 out of 4	84.6234	45.4046	0.0221	fold change	1.21					39.2188	0.034	fold change	1.24
HDAC6	10013	histone deacetylase 6	2 out of 4	84.1733	47.7874	0.0419	fold change	-1.22					36.3859	0.0435	fold change	-1.21
SFT2D3	84826	SFT2 domain containing 3	2 out of 4	83.7905	45.4046	0.0257	fold change	-1.21					38.3859	0.0197	fold change	-1.23
PBRM1	55193	polybromo 1	2 out of 4	83.1825	42.8706	0.0239	fold change	-1.2					40.3119	0.0409	fold change	-1.25
SERPINF2	5345	serpin peptidase inhibitor, clade F (alpha-2 antiplasmin, pigment epithelium derived factor), member 2	2 out of 4	79.2565	42.8706	0.0316	fold change	-1.2					36.3859	0.0246	fold change	-1.21
LOC100506844	100506844	uncharacterized LOC100506844	2 out of 4	79.2565	42.8706	0.0404	fold change	1.2					36.3859	0.0414	fold change	1.21
ZNF101	94039	zinc finger protein 101	2 out of 4	79.2565	42.8706	0.0087	fold change	1.2					36.3859	0.0176	fold change	1.21
TRIQK	286144	triple QxxK/R motif containing	2 out of 4	79.2565	42.8706	0.0087	fold change	1.2					36.3859	0.0414	fold change	1.21
S100A8	6279	S100 calcium binding protein A8	1 out of 4	99.9181									99.9181	0.0265	fold change	-6.39
HLA-DQA1	3117	major histocompatibility complex, class II, DQ alpha 1	1 out of 4	99.9181	99.9181	0.0384	fold change	3.48
P2RY12	64805	purinergic receptor P2Y, G-protein coupled, 12	1 out of 4	99.8363					99.8363	0.0097	fold change	2.14
SLC1A2	6506	solute carrier family 1 (glial high affinity glutamate transporter), member 2	1 out of 4	99.8363									99.8363	0.03	fold change	4.09
AW960145	NA		1 out of 4	99.8363	99.8363	0.0042	fold change	-3.41
AZGP1	563	alpha-2-glycoprotein 1, zinc-binding	1 out of 4	99.7546									99.7546	0.0346	fold change	-3.91
ARHGAP36	158763	Rho GTPase activating protein 36	1 out of 4	99.7546	99.7546	0.0234	fold change	2.78
CALB1	793	calbindin 1, 28kDa	1 out of 4	99.6751	99.6751	0.0329	fold change	2.59
SETD9	133383	SET domain containing 9	1 out of 4	99.6751					99.6751	0.0013	fold change	1.97
TNFSF10	8743	tumor necrosis factor (ligand) superfamily, member 10	1 out of 4	99.6751					99.6751	0.0271	fold change	1.97
C11orf87	399947	chromosome 11 open reading frame 87	1 out of 4	99.5124	99.5124	0.0208	fold change	2.5
TYMS	7298	thymidylate synthetase	1 out of 4	99.5124					99.5124	0.0081	fold change	1.95
FYB1	2533	FYN binding protein	1 out of 4	99.4332													99.4332	0.0323	fold change	-3.7
PRSS35	167681	protease, serine, 35	1 out of 4	99.4332					99.4332	0.0243	fold change	1.89
ADARB2	105	adenosine deaminase, RNA-specific, B2	1 out of 4	99.4332									99.4332	0.0164	fold change	-2.99
MS4A6A	64231	membrane-spanning 4-domains, subfamily A, member 6A	1 out of 4	99.3522													99.3522	0.0482	fold change	-3.56
SLC26A4-AS1	286002	SLC26A4 antisense RNA 1	1 out of 4	99.3522	99.3522	0.0347	fold change	2.24
AU158442	NA		1 out of 4	99.2713					99.2713	0.0317	fold change	-1.84
RARRES1	5918	retinoic acid receptor responder (tazarotene induced) 1	1 out of 4	99.2713					99.2713	0.0354	fold change	1.84
HBB	3043	hemoglobin, beta	1 out of 4	99.2713									99.2713	0.0484	fold change	-2.91
TMEM35A	59353	transmembrane protein 35	1 out of 4	99.2713	99.2713	0.0209	fold change	2.23
STYK1	55359	serine/threonine/tyrosine kinase 1	1 out of 4	99.1926	99.1926	0.0328	fold change	2.17
OLFM3	118427	olfactomedin 3	1 out of 4	99.112	99.112	0.0216	fold change	2.16
RSAD2	91543	radical S-adenosyl methionine domain containing 2	1 out of 4	99.0315					99.0315	0.0091	fold change	1.8
BTNL9	153579	butyrophilin-like 9	1 out of 4	98.9531					98.9531	0.0001	fold change	-1.75
TYROBP	7305	TYRO protein tyrosine kinase binding protein	1 out of 4	98.9531													98.9531	0.0489	fold change	-3.14
UNC13C	440279	unc-13 homolog C (C. elegans)	1 out of 4	98.9531	98.9531	0.0112	fold change	2.09
OR7A5	26659	olfactory receptor, family 7, subfamily A, member 5	1 out of 4	98.9531					98.9531	0.0297	fold change	-1.75
AL831899	NA		1 out of 4	98.8728	98.8728	0.0284	fold change	2.08
NIPSNAP3B	55335	nipsnap homolog 3B (C. elegans)	1 out of 4	98.7928	98.7928	0.003	fold change	2.03
LRP2	4036	low density lipoprotein receptor-related protein 2	1 out of 4	98.7928									98.7928	0.0123	fold change	-2.68
GJB2	2706	gap junction protein, beta 2, 26kDa	1 out of 4	98.7928					98.7928	0.0488	fold change	1.74
IGFBP3	3486	insulin-like growth factor binding protein 3	1 out of 4	98.7928													98.7928	0.0243	fold change	-3.11
PRKACB	5567	protein kinase, cAMP-dependent, catalytic, beta	1 out of 4	98.7928					98.7928	0.0362	fold change	1.74
FAM19A2	338811	family with sequence similarity 19 (chemokine (C-C motif)-like), member A2	1 out of 4	98.7147	98.7147	0.032	fold change	1.99
RIT2	6014	Ras-like without CAAX 2	1 out of 4	98.6349	98.6349	0.0396	fold change	1.96
CCNE2	9134	cyclin E2	1 out of 4	98.6349					98.6349	0.0327	fold change	1.73
XK	7504	X-linked Kx blood group (McLeod syndrome)	1 out of 4	98.6349	98.6349	0.0191	fold change	1.96
C1QC	714	complement component 1, q subcomponent, C chain	1 out of 4	98.6349													98.6349	0.0498	fold change	-3.08
SOHLH2	54937	spermatogenesis and oogenesis specific basic helix-loop-helix 2	1 out of 4	98.6349									98.6349	0.0405	fold change	2.61
ABCA8	10351	ATP-binding cassette, sub-family A (ABC1), member 8	1 out of 4	98.5552									98.5552	0.0141	fold change	-2.59
IFI44L	10964	interferon-induced protein 44-like	1 out of 4	98.5552					98.5552	0.0264	fold change	1.72
RAB3B	5865	RAB3B, member RAS oncogene family	1 out of 4	98.4775	98.4775	0.0374	fold change	1.95
GRM1	2911	glutamate receptor, metabotropic 1	1 out of 4	98.3187	98.3187	0.0427	fold change	1.94
MRAP2	112609	melanocortin 2 receptor accessory protein 2	1 out of 4	98.3187	98.3187	0.032	fold change	1.94
SSTR1	6751	somatostatin receptor 1	1 out of 4	98.3187	98.3187	0.0014	fold change	1.94
ZCCHC12	170261	zinc finger, CCHC domain containing 12	1 out of 4	98.3187	98.3187	0.031	fold change	1.94
SLC30A1	7779	solute carrier family 30 (zinc transporter), member 1	1 out of 4	98.3187					98.3187	0.0187	fold change	1.71
GREM1	26585	gremlin 1	1 out of 4	98.2415									98.2415	0.0256	fold change	-2.56
LOC389834	389834	ankyrin repeat domain 57 pseudogene	1 out of 4	98.2415					98.2415	0.0037	fold change	-1.7
GPNMB	10457	glycoprotein (transmembrane) nmb	1 out of 4	98.0834									98.0834	0.0488	fold change	-2.54
P2RY13	53829	purinergic receptor P2Y, G-protein coupled, 13	1 out of 4	98.0834					98.0834	0.0093	fold change	1.69
LIPG	9388	lipase, endothelial	1 out of 4	98.0065													98.0065	0.0191	fold change	-2.88
PCK1	5105	phosphoenolpyruvate carboxykinase 1 (soluble)	1 out of 4	98.0065	98.0065	0.0084	fold change	-1.93
ZWINT	11130	ZW10 interactor	1 out of 4	97.9278					97.9278	0.0313	fold change	1.68
CX3CR1	1524	chemokine (C-X3-C motif) receptor 1	1 out of 4	97.9278					97.9278	0.0237	fold change	1.68
MYLK3	91807	myosin light chain kinase 3	1 out of 4	97.9278	97.9278	0.0378	fold change	1.91
RAB27B	5874	RAB27B, member RAS oncogene family	1 out of 4	97.9278	97.9278	0.0413	fold change	1.91
KCNV1	27012	potassium channel, subfamily V, member 1	1 out of 4	97.9278	97.9278	0.0098	fold change	1.91
FGF12	2257	fibroblast growth factor 12	1 out of 4	97.9278	97.9278	0.0452	fold change	1.91
ANKRD18A	253650	ankyrin repeat domain 18A	1 out of 4	97.8493									97.8493	0.0051	fold change	-2.53
FLCN	201163	folliculin	1 out of 4	97.7727					97.7727	0.0134	fold change	-1.67
PRC1	9055	protein regulator of cytokinesis 1	1 out of 4	97.7727					97.7727	0.0204	fold change	1.67
UGT8	7368	UDP glycosyltransferase 8	1 out of 4	97.6944									97.6944	0.0137	fold change	-2.47
TMEM165	55858	transmembrane protein 165	1 out of 4	97.6162									97.6162	0.0028	fold change	-2.46
LINC01268	285758	uncharacterized LOC285758	1 out of 4	97.54					97.54	0.0057	fold change	1.65
SYTL2	54843	synaptotagmin-like 2	1 out of 4	97.54					97.54	0.0368	fold change	1.65
MEF2C	4208	myocyte enhancer factor 2C	1 out of 4	97.54	97.54	0.0207	fold change	1.9
PTH2R	5746	parathyroid hormone 2 receptor	1 out of 4	97.4621	97.4621	0.0427	fold change	1.89
KLHL7	55975	kelch-like 7 (Drosophila)	1 out of 4	97.3843					97.3843	0.0011	fold change	1.64
IFI44	10561	interferon-induced protein 44	1 out of 4	97.3843					97.3843	0.0046	fold change	1.64
HTR2A	3356	5-hydroxytryptamine (serotonin) receptor 2A, G protein-coupled	1 out of 4	97.3843	97.3843	0.0312	fold change	1.88
FA2H	79152	fatty acid 2-hydroxylase	1 out of 4	97.3843									97.3843	0.0064	fold change	-2.44
SGPP1	81537	sphingosine-1-phosphate phosphatase 1	1 out of 4	97.1534					97.1534	0.0251	fold change	1.63
LDLR	3949	low density lipoprotein receptor	1 out of 4	97.1534													97.1534	0.0323	fold change	-2.6
SYN2	6854	synapsin II	1 out of 4	97.1534	97.1534	0.0176	fold change	1.86
HLF	3131	hepatic leukemia factor	1 out of 4	97.0761	97.0761	0.0224	fold change	1.85
MAD2L1	4085	MAD2 mitotic arrest deficient-like 1 (yeast)	1 out of 4	97.0761	97.0761	0.0146	fold change	1.85
AA809487	NA		1 out of 4	97.0761					97.0761	0.0175	fold change	1.61
OLFML3	56944	olfactomedin-like 3	1 out of 4	97.0761					97.0761	0.0275	fold change	1.61
ID1	3397	inhibitor of DNA binding 1, dominant negative helix-loop-helix protein	1 out of 4	97.0761					97.0761	0.0263	fold change	1.61
CLIC5	53405	chloride intracellular channel 5	1 out of 4	97.0761	97.0761	0.02	fold change	1.85
TLR2	7097	toll-like receptor 2	1 out of 4	97.0761													97.0761	0.0487	fold change	-2.58
PEG10	23089	paternally expressed 10	1 out of 4	97.0761	97.0761	0.0346	fold change	1.85
NTS	4922	neurotensin	1 out of 4	97.0761	97.0761	0.0428	fold change	1.85
FOLH1	2346	folate hydrolase (prostate-specific membrane antigen) 1	1 out of 4	96.9236									96.9236	0.0454	fold change	-2.4
LOC100128079	100128079	uncharacterized LOC100128079	1 out of 4	96.7717									96.7717	0.0147	fold change	-2.37
AI355441	NA		1 out of 4	96.7717									96.7717	0.0141	fold change	-2.37
AI291804	NA		1 out of 4	96.695					96.695	0.0108	fold change	-1.6
GPR34	2857	G protein-coupled receptor 34	1 out of 4	96.695													96.695	0.0371	fold change	-2.51
PAIP2B	400961	poly(A) binding protein interacting protein 2B	1 out of 4	96.6184									96.6184	0.0386	fold change	-2.36
KCNIP4	80333	Kv channel interacting protein 4	1 out of 4	96.6184	96.6184	0.0171	fold change	1.83
ERICH3	127254	chromosome 1 open reading frame 173	1 out of 4	96.6184	96.6184	0.0411	fold change	1.83
TUSC3	7991	tumor suppressor candidate 3	1 out of 4	96.4674	96.4674	0.0049	fold change	1.82
SLC1A6	6511	solute carrier family 1 (high affinity aspartate/glutamate transporter), member 6	1 out of 4	96.3911	96.3911	0.0306	fold change	1.81
CDH8	1006	cadherin 8, type 2	1 out of 4	96.3911	96.3911	0.0283	fold change	1.81
HSPB8	26353	heat shock 22kDa protein 8	1 out of 4	96.3911													96.3911	0.05	fold change	-2.4
EDNRB	1910	endothelin receptor type B	1 out of 4	96.3911					96.3911	0.0046	fold change	1.59
PDCD4	27250	programmed cell death 4 (neoplastic transformation inhibitor)	1 out of 4	96.3911	96.3911	0.018	fold change	1.81
ENDOD1	23052	endonuclease domain containing 1	1 out of 4	96.2408									96.2408	0.045	fold change	-2.32
ASPA	443	aspartoacylase	1 out of 4	96.1649									96.1649	0.0048	fold change	-2.31
RHBDL2	54933	rhomboid, veinlet-like 2 (Drosophila)	1 out of 4	96.091					96.091	0.0158	fold change	1.56
C10orf128	170371	chromosome 10 open reading frame 128	1 out of 4	96.091									96.091	0.0146	fold change	-2.28
C2orf80	389073	chromosome 2 open reading frame 80	1 out of 4	96.091	96.091	0.0188	fold change	1.8
GABRD	2563	gamma-aminobutyric acid (GABA) A receptor, delta	1 out of 4	96.091	96.091	0.0121	fold change	1.8
UNC5D	137970	unc-5 homolog D (C. elegans)	1 out of 4	96.091	96.091	0.0208	fold change	1.8
TLR4	7099	toll-like receptor 4	1 out of 4	96.091					96.091	0.0024	fold change	1.56
CD44	960	CD44 molecule (Indian blood group)	1 out of 4	96.091													96.091	0.0276	fold change	-2.34
AW979271	NA		1 out of 4	96.091					96.091	0.0013	fold change	-1.56
SNRPN	6638	small nuclear ribonucleoprotein polypeptide N	1 out of 4	96.091	96.091	0.0324	fold change	1.8
CYP4V2	285440	cytochrome P450, family 4, subfamily V, polypeptide 2	1 out of 4	96.091					96.091	0.0296	fold change	1.56
TSC22D1-AS1	641467	TSC22D1 antisense RNA 1	1 out of 4	96.0154									96.0154	0.0299	fold change	2.27
DNAH17	8632	dynein, axonemal, heavy chain 17	1 out of 4	95.9398									95.9398	0.0153	fold change	-2.26
PIEZO2	63895	piezo-type mechanosensitive ion channel component 2	1 out of 4	95.8662									95.8662	0.0191	fold change	-2.24
BICD1	636	bicaudal D homolog 1 (Drosophila)	1 out of 4	95.7909					95.7909	0.0087	fold change	1.55
AI684643	NA		1 out of 4	95.7909					95.7909	0.0467	fold change	-1.55
TPTE2P1	646405	transmembrane phosphoinositide 3-phosphatase and tensin homolog 2 pseudogene 1	1 out of 4	95.7909					95.7909	0.001	fold change	-1.55
PIK3AP1	118788	phosphoinositide-3-kinase adaptor protein 1	1 out of 4	95.7909													95.7909	0.0151	fold change	-2.31
BOK	666	BCL2-related ovarian killer	1 out of 4	95.7909									95.7909	0.0059	fold change	-2.23
TEKT4P2	100132288	tektin 4 pseudogene 2	1 out of 4	95.7909					95.7909	0.0115	fold change	-1.55
LOC401220	401220	uncharacterized LOC401220	1 out of 4	95.7909	95.7909	0.0405	fold change	1.79
GABRA4	2557	gamma-aminobutyric acid (GABA) A receptor, alpha 4	1 out of 4	95.5676	95.5676	0.0104	fold change	1.75
KCTD4	386618	potassium channel tetramerisation domain containing 4	1 out of 4	95.5676	95.5676	0.0104	fold change	1.75
MACROD2	140733	MACRO domain containing 2	1 out of 4	95.4198	95.4198	0.0148	fold change	1.74
MAP4	4134	microtubule-associated protein 4	1 out of 4	95.4198	95.4198	0.0449	fold change	1.74
NAPSB	256236	napsin B aspartic peptidase, pseudogene	1 out of 4	95.4198													95.4198	0.0071	fold change	-2.28
RUNX2	860	runt-related transcription factor 2	1 out of 4	95.4198									95.4198	0.0178	fold change	-2.21
MUM1L1	139221	melanoma associated antigen (mutated) 1-like 1	1 out of 4	95.4198	95.4198	0.0048	fold change	1.74
CAV1	857	caveolin 1, caveolae protein, 22kDa	1 out of 4	95.3452					95.3452	0.0409	fold change	1.54
EFCAB11	90141	EF-hand calcium binding domain 11	1 out of 4	95.3452					95.3452	0.0061	fold change	1.54
SLC5A11	115584	solute carrier family 5 (sodium/glucose cotransporter), member 11	1 out of 4	95.2708									95.2708	0.003	fold change	-2.2
GNAL	2774	guanine nucleotide binding protein (G protein), alpha activating activity polypeptide, olfactory type	1 out of 4	95.1982	95.1982	0.0325	fold change	1.73
LAMP5	24141	lysosomal-associated membrane protein family, member 5	1 out of 4	95.1982	95.1982	0.0155	fold change	1.73
FAXC	84553	failed axon connections homolog (Drosophila)	1 out of 4	95.1982	95.1982	0.0128	fold change	1.73
GRIA4	2893	glutamate receptor, ionotropic, AMPA 4	1 out of 4	95.1982	95.1982	0.0466	fold change	1.73
LINC01616	106456574		1 out of 4	95.1982	95.1982	0.02	fold change	1.73
TSPAN15	23555	tetraspanin 15	1 out of 4	95.1239					95.1239	0.0417	fold change	1.53
PRR11	55771	proline rich 11	1 out of 4	95.1239					95.1239	0.0029	fold change	1.53
CNKSR3	154043	CNKSR family member 3	1 out of 4	95.1239									95.1239	0.0081	fold change	-2.18
CTGF	1490	connective tissue growth factor	1 out of 4	95.1239					95.1239	0.0359	fold change	1.53
ANP32E	81611	acidic (leucine-rich) nuclear phosphoprotein 32 family, member E	1 out of 4	95.1239					95.1239	0.0159	fold change	1.53
PLD1	5337	phospholipase D1, phosphatidylcholine-specific	1 out of 4	94.9758									94.9758	0.0251	fold change	-2.17
GPR85	54329	G protein-coupled receptor 85	1 out of 4	94.8299	94.8299	0.0256	fold change	1.72
TMEFF2	23671	transmembrane protein with EGF-like and two follistatin-like domains 2	1 out of 4	94.8299	94.8299	0.0067	fold change	1.72
ATOH8	84913	atonal homolog 8 (Drosophila)	1 out of 4	94.8299	94.8299	0.0176	fold change	-1.72
PAX8-AS1	654433	uncharacterized LOC654433	1 out of 4	94.8299	94.8299	0.0434	fold change	1.72
CELF4	56853	CUGBP, Elav-like family member 4	1 out of 4	94.7562					94.7562	0.0157	fold change	-1.52
AV699657	NA		1 out of 4	94.6844									94.6844	0.0313	fold change	-2.15
FRMD4B	23150	FERM domain containing 4B	1 out of 4	94.6844									94.6844	0.0083	fold change	-2.15
DOCK11	139818	dedicator of cytokinesis 11	1 out of 4	94.6844													94.6844	0.0246	fold change	-2.23
CD300A	11314	CD300a molecule	1 out of 4	94.611													94.611	0.0138	fold change	-2.22
SEMA3E	9723	sema domain, immunoglobulin domain (Ig), short basic domain, secreted, (semaphorin) 3E	1 out of 4	94.4662					94.4662	0.0287	fold change	1.51
AI963079	NA		1 out of 4	94.4662					94.4662	0.042	fold change	-1.51
LINC01578	100507217	uncharacterized LOC100507217	1 out of 4	94.4662					94.4662	0.0019	fold change	1.51
N4BP2L2	10443	NEDD4 binding protein 2-like 2	1 out of 4	94.4662					94.4662	0.0024	fold change	1.51
AI925316	NA		1 out of 4	94.3931									94.3931	0.0422	fold change	-2.14
SPON1	10418	spondin 1, extracellular matrix protein	1 out of 4	94.3931	94.3931	0.0162	fold change	1.71
DLGAP1	9229	discs, large (Drosophila) homolog-associated protein 1	1 out of 4	94.3931	94.3931	0.0375	fold change	1.71
PTGER3	5733	prostaglandin E receptor 3 (subtype EP3)	1 out of 4	94.3931	94.3931	0.0293	fold change	1.71
ROBO2	6092	roundabout, axon guidance receptor, homolog 2 (Drosophila)	1 out of 4	94.3931	94.3931	0.0219	fold change	1.71
SLITRK4	139065	SLIT and NTRK-like family, member 4	1 out of 4	94.3931	94.3931	0.0199	fold change	1.71
TNRC6C-AS1	100131096	uncharacterized LOC100131096	1 out of 4	94.3931									94.3931	0.0002	fold change	-2.14
CFI	3426	complement factor I	1 out of 4	94.0327													94.0327	0.0381	fold change	-2.13
AW575863	NA		1 out of 4	93.9602					93.9602	0.0391	fold change	1.5
IFIT3	3437	interferon-induced protein with tetratricopeptide repeats 3	1 out of 4	93.8174					93.8174	0.0142	fold change	1.49
ARIH2OS	646450	ariadne homolog 2 opposite strand	1 out of 4	93.8174					93.8174	0.0109	fold change	1.49
BC041965	NA		1 out of 4	93.8174					93.8174	0.0357	fold change	-1.49
S100A9	6280	S100 calcium binding protein A9	1 out of 4	93.7453									93.7453	0.0132	fold change	-2.11
PCSK6	5046	proprotein convertase subtilisin/kexin type 6	1 out of 4	93.7453									93.7453	0.0159	fold change	-2.11
GAD1	2571	glutamate decarboxylase 1 (brain, 67kDa)	1 out of 4	93.6733	93.6733	0.0471	fold change	1.7
ARHGAP6	395	Rho GTPase activating protein 6	1 out of 4	93.6733	93.6733	0.0115	fold change	1.7
PCDH7	5099	protocadherin 7	1 out of 4	93.6733	93.6733	0.0142	fold change	1.7
NPY1R	4886	neuropeptide Y receptor Y1	1 out of 4	93.6733	93.6733	0.0388	fold change	1.7
LOC285147	285147	uncharacterized LOC285147	1 out of 4	93.6733	93.6733	0.0129	fold change	1.7
RYR2	6262	ryanodine receptor 2 (cardiac)	1 out of 4	93.5314					93.5314	0.0369	fold change	-1.48
DDX60	55601	DEAD (Asp-Glu-Ala-Asp) box polypeptide 60	1 out of 4	93.5314					93.5314	0.0027	fold change	1.48
CCNG2	901	cyclin G2	1 out of 4	93.5314					93.5314	0.006	fold change	1.48
SENP6	26054	SUMO1/sentrin specific peptidase 6	1 out of 4	93.5314					93.5314	0.0465	fold change	1.48
SMC4	10051	structural maintenance of chromosomes 4	1 out of 4	93.5314					93.5314	0.0056	fold change	1.48
PLEKHH1	57475	pleckstrin homology domain containing, family H (with MyTH4 domain) member 1	1 out of 4	93.4597									93.4597	0.0114	fold change	-2.1
AU144590	NA		1 out of 4	93.3184	93.3184	0.0243	fold change	1.69
PTPRO	5800	protein tyrosine phosphatase, receptor type, O	1 out of 4	93.3184	93.3184	0.0377	fold change	1.69
AW057518	NA		1 out of 4	93.3184	93.3184	0.0436	fold change	-1.69
SLC6A15	55117	solute carrier family 6 (neutral amino acid transporter), member 15	1 out of 4	93.3184	93.3184	0.0488	fold change	1.69
ZSCAN31	64288	zinc finger protein 323	1 out of 4	93.247													93.247	0.0412	fold change	2.05
BC004969	NA		1 out of 4	93.247													93.247	0.0385	fold change	-2.05
ERBB3	2065	v-erb-b2 erythroblastic leukemia viral oncogene homolog 3 (avian)	1 out of 4	92.9662									92.9662	0.0126	fold change	-2.08
TRPM6	140803	transient receptor potential cation channel, subfamily M, member 6	1 out of 4	92.9662									92.9662	0.011	fold change	-2.08
BC032027	NA		1 out of 4	92.8954					92.8954	0.0176	fold change	-1.47
CRLF3	51379	cytokine receptor-like factor 3	1 out of 4	92.8954					92.8954	0.0117	fold change	-1.47
GUSBP1	728411	glucuronidase, beta pseudogene 1	1 out of 4	92.8954	92.8954	0.0437	fold change	1.68
C6orf120	387263	chromosome 6 open reading frame 120	1 out of 4	92.8954					92.8954	0.0392	fold change	1.47
NUDT11	55190	nudix (nucleoside diphosphate linked moiety X)-type motif 11	1 out of 4	92.8954	92.8954	0.0208	fold change	1.68
LINC00339	29092	long intergenic non-protein coding RNA 339	1 out of 4	92.8954					92.8954	0.0107	fold change	1.47
PCDHB6	56130	protocadherin beta 6	1 out of 4	92.8954					92.8954	0.0308	fold change	1.47
KLHL32	114792	kelch-like 32 (Drosophila)	1 out of 4	92.7541									92.7541	0.017	fold change	-2.07
LOC283484	283484	uncharacterized LOC283484	1 out of 4	92.7541									92.7541	0.0414	fold change	2.07
MOG	4340	myelin oligodendrocyte glycoprotein	1 out of 4	92.7541									92.7541	0.0332	fold change	-2.07
1555578_at	NA		1 out of 4	92.7541	92.7541	0.0007	fold change	1.67
LST1	7940	leukocyte specific transcript 1	1 out of 4	92.7541													92.7541	0.0249	fold change	-1.99
LOC158434	158434	uncharacterized LOC158434	1 out of 4	92.7541	92.7541	0.0033	fold change	-1.67
BC037339	NA		1 out of 4	92.6149	92.6149	0.0241	fold change	1.66
GALNT12	79695	UDP-N-acetyl-alpha-D-galactosamine:polypeptide N-acetylgalactosaminyltransferase 12 (GalNAc-T12)	1 out of 4	92.6149	92.6149	0.0107	fold change	1.66
TMEM67	91147	transmembrane protein 67	1 out of 4	92.6149	92.6149	0.0077	fold change	1.66
C1orf115	79762	chromosome 1 open reading frame 115	1 out of 4	92.6149	92.6149	0.0131	fold change	1.66
LRMP	4033	lymphoid-restricted membrane protein	1 out of 4	92.6149	92.6149	0.0277	fold change	1.66
AW009630	NA		1 out of 4	92.6149	92.6149	0.0046	fold change	1.66
N90719	NA		1 out of 4	92.6149	92.6149	0.0485	fold change	1.66
LYPD1	116372	LY6/PLAUR domain containing 1	1 out of 4	92.4761									92.4761	0.0131	fold change	2.06
SMG1P2	440354	smg-1 homolog, phosphatidylinositol 3-kinase-related kinase (C. elegans) pseudogene	1 out of 4	92.4061													92.4061	0.0181	fold change	-1.96
2022-03-01	55016	membrane-associated ring finger (C3HC4) 1, E3 ubiquitin protein ligase	1 out of 4	92.2679					92.2679	0.0265	fold change	1.46
Hs.677583	NA		1 out of 4	92.2679					92.2679	0.0446	fold change	-1.46
AW954199	NA		1 out of 4	92.2679					92.2679	0.0203	fold change	-1.46
TM6SF1	53346	transmembrane 6 superfamily member 1	1 out of 4	92.2679					92.2679	0.0465	fold change	1.46
CAV2	858	caveolin 2	1 out of 4	92.2679					92.2679	0.0052	fold change	1.46
AL833224	NA		1 out of 4	92.2679					92.2679	0.0169	fold change	-1.46
DGKG	1608	diacylglycerol kinase, gamma 90kDa	1 out of 4	92.2679					92.2679	0.0494	fold change	-1.46
ITPR1-AS1	100996539	uncharacterized LOC100996539	1 out of 4	92.2679					92.2679	0.0092	fold change	-1.46
CCDC58	131076	coiled-coil domain containing 58	1 out of 4	92.2679					92.2679	0.0392	fold change	1.46
CTSO	1519	cathepsin O	1 out of 4	92.2679					92.2679	0.0163	fold change	1.46
LPAR1	1902	lysophosphatidic acid receptor 1	1 out of 4	92.1982									92.1982	0.0321	fold change	-2.04
ID3	3399	inhibitor of DNA binding 3, dominant negative helix-loop-helix protein	1 out of 4	92.1982													92.1982	0.0149	fold change	-1.94
TMCC3	57458	transmembrane and coiled-coil domain family 3	1 out of 4	92.1982									92.1982	0.0021	fold change	-2.04
KCNH8	131096	potassium voltage-gated channel, subfamily H (eag-related), member 8	1 out of 4	92.1982									92.1982	0.0201	fold change	-2.04
CDH13	1012	cadherin 13, H-cadherin (heart)	1 out of 4	92.1982									92.1982	0.0114	fold change	2.04
ZEB2	9839	zinc finger E-box binding homeobox 2	1 out of 4	92.1982									92.1982	0.014	fold change	-2.04
GABRA2	2555	gamma-aminobutyric acid (GABA) A receptor, alpha 2	1 out of 4	91.9219	91.9219	0.0231	fold change	1.65
CACNB4	785	calcium channel, voltage-dependent, beta 4 subunit	1 out of 4	91.9219	91.9219	0.0253	fold change	1.65
ELMOD1	55531	ELMO/CED-12 domain containing 1	1 out of 4	91.9219	91.9219	0.0475	fold change	1.65
SLC2A13	114134	solute carrier family 2 (facilitated glucose transporter), member 13	1 out of 4	91.9219	91.9219	0.01	fold change	1.65
LNX1	84708	ligand of numb-protein X 1, E3 ubiquitin protein ligase	1 out of 4	91.9219	91.9219	0.0083	fold change	1.65
FGF14	2259	fibroblast growth factor 14	1 out of 4	91.9219	91.9219	0.0466	fold change	1.65
S1PR5	53637	sphingosine-1-phosphate receptor 5	1 out of 4	91.6489									91.6489	0.0234	fold change	-2.03
LGALS8	3964	lectin, galactoside-binding, soluble, 8	1 out of 4	91.5114									91.5114	0.0222	fold change	2.02
GALNT15	117248	UDP-N-acetyl-alpha-D-galactosamine:polypeptide N-acetylgalactosaminyltransferase-like 2	1 out of 4	91.5114													91.5114	0.0276	fold change	-1.89
TAF4B	6875	TAF4b RNA polymerase II, TATA box binding protein (TBP)-associated factor, 105kDa	1 out of 4	91.5114													91.5114	0.0499	fold change	1.89
CDH19	28513	cadherin 19, type 2	1 out of 4	91.5114									91.5114	0.0094	fold change	-2.02
AU146764	NA		1 out of 4	91.4445					91.4445	0.016	fold change	-1.45
Hs.658336	NA		1 out of 4	91.4445					91.4445	0.0141	fold change	1.45
SRD5A3	79644	steroid 5 alpha-reductase 3	1 out of 4	91.4445					91.4445	0.0169	fold change	1.45
CLUL1	27098	clusterin-like 1 (retinal)	1 out of 4	91.4445					91.4445	0.0328	fold change	1.45
EGLN3	112399	egl nine homolog 3 (C. elegans)	1 out of 4	91.4445					91.4445	0.0031	fold change	1.45
1558448_a_at	NA		1 out of 4	91.4445					91.4445	0.0471	fold change	-1.45
AA688152	NA		1 out of 4	91.4445					91.4445	0.0034	fold change	1.45
GLS2	27165	glutaminase 2 (liver, mitochondrial)	1 out of 4	91.3759	91.3759	0.0362	fold change	1.64
KCND2	3751	potassium voltage-gated channel, Shal-related subfamily, member 2	1 out of 4	91.3759	91.3759	0.0258	fold change	1.64
BF110534	NA		1 out of 4	91.3759	91.3759	0.0237	fold change	1.64
GUCY1A1	2982	guanylate cyclase 1, soluble, alpha 3	1 out of 4	91.3759	91.3759	0.0015	fold change	1.64
CREB5	9586	cAMP responsive element binding protein 5	1 out of 4	91.3075									91.3075	0.0195	fold change	-2.01
ENPP2	5168	ectonucleotide pyrophosphatase/phosphodiesterase 2	1 out of 4	91.3075									91.3075	0.0302	fold change	-2.01
SCN2B	6327	sodium channel, voltage-gated, type II, beta subunit	1 out of 4	91.0382	91.0382	0.0484	fold change	1.63
C8orf34-AS1	286189	uncharacterized LOC286189	1 out of 4	91.0382	91.0382	0.0016	fold change	1.63
ARHGAP20	57569	Rho GTPase activating protein 20	1 out of 4	91.0382	91.0382	0.0311	fold change	1.63
CA10	56934	carbonic anhydrase X	1 out of 4	91.0382	91.0382	0.0126	fold change	1.63
P2RY14	9934	purinergic receptor P2Y, G-protein coupled, 14	1 out of 4	91.0382	91.0382	0.0364	fold change	-1.63
TGFBR1	7046	transforming growth factor, beta receptor 1	1 out of 4	90.9703													90.9703	0.0291	fold change	-1.86
CREM	1390	cAMP responsive element modulator	1 out of 4	90.9025					90.9025	0.0124	fold change	1.44
SLC7A11	23657	solute carrier family 7 (anionic amino acid transporter light chain, xc- system), member 11	1 out of 4	90.9025					90.9025	0.0276	fold change	1.44
ZBTB16	7704	zinc finger and BTB domain containing 16	1 out of 4	90.9025					90.9025	0.0303	fold change	-1.44
ATF7	11016	activating transcription factor 7	1 out of 4	90.9025					90.9025	0.0032	fold change	1.44
PROM1	8842	prominin 1	1 out of 4	90.9025					90.9025	0.0244	fold change	1.44
CNIH4	29097	cornichon homolog 4 (Drosophila)	1 out of 4	90.8364									90.8364	0.0019	fold change	-1.99
FAM201A	158228	family with sequence similarity 201, member A	1 out of 4	90.8364									90.8364	0.0431	fold change	-1.99
GJA5	2702	gap junction protein, alpha 5, 40kDa	1 out of 4	90.7688													90.7688	0.014	fold change	-1.85
SLCO2B1	11309	solute carrier organic anion transporter family, member 2B1	1 out of 4	90.7688													90.7688	0.0298	fold change	-1.85
TOX3	27324	TOX high mobility group box family member 3	1 out of 4	90.5682	90.5682	0.0087	fold change	1.62
HOOK1	51361	hook homolog 1 (Drosophila)	1 out of 4	90.5682	90.5682	0.0159	fold change	1.62
NEGR1	257194	neuronal growth regulator 1	1 out of 4	90.5682	90.5682	0.0078	fold change	1.62
ELF4	2000	E74-like factor 4 (ets domain transcription factor)	1 out of 4	90.501													90.501	0.0302	fold change	-1.84
CXCL12	6387	chemokine (C-X-C motif) ligand 12	1 out of 4	90.501													90.501	0.028	fold change	-1.84
BF508288	NA		1 out of 4	90.501									90.501	0.0443	fold change	-1.98
TJP2	9414	tight junction protein 2	1 out of 4	90.3685													90.3685	0.0063	fold change	-1.83
PPA2	27068	pyrophosphatase (inorganic) 2	1 out of 4	90.3016					90.3016	0.0236	fold change	1.43
MICAL3	57553	microtubule associated monoxygenase, calponin and LIM domain containing 3	1 out of 4	90.3016					90.3016	0.0012	fold change	-1.43
RIMBP2	23504	RIMS binding protein 2	1 out of 4	90.3016					90.3016	0.0388	fold change	-1.43
FTCDNL1	348751	uncharacterized LOC348751	1 out of 4	90.3016					90.3016	0.0281	fold change	1.43
PCGF5	84333	polycomb group ring finger 5	1 out of 4	90.3016					90.3016	0.0062	fold change	1.43
LINC00965	349196	uncharacterized LOC349196	1 out of 4	90.3016					90.3016	0.0299	fold change	1.43
AW663083	NA		1 out of 4	90.3016					90.3016	0.0285	fold change	-1.43
HPCA	3208	hippocalcin	1 out of 4	90.3016					90.3016	0.0325	fold change	-1.43
BF109952	NA		1 out of 4	90.3016					90.3016	0.0014	fold change	-1.43
AW014345	NA		1 out of 4	90.3016					90.3016	0.0106	fold change	-1.43
FEN1	2237	flap structure-specific endonuclease 1	1 out of 4	90.3016					90.3016	0.0309	fold change	1.43
CCDC85A	114800	coiled-coil domain containing 85A	1 out of 4	90.1697	90.1697	0.029	fold change	1.61
ST8SIA1	6489	ST8 alpha-N-acetyl-neuraminide alpha-2,8-sialyltransferase 1	1 out of 4	90.1697	90.1697	0.0204	fold change	1.61
DNAH9	1770	dynein, axonemal, heavy chain 9	1 out of 4	90.1697	90.1697	0.0478	fold change	1.61
NEXMIF	340533	KIAA2022	1 out of 4	90.1697	90.1697	0.0173	fold change	1.61
IQGAP1	8826	IQ motif containing GTPase activating protein 1	1 out of 4	90.1697													90.1697	0.0491	fold change	-1.82
EYA4	2070	eyes absent homolog 4 (Drosophila)	1 out of 4	90.1697	90.1697	0.0351	fold change	1.61
SOX7	83595	SRY (sex determining region Y)-box 7	1 out of 4	89.9717									89.9717	0.01	fold change	-1.96
SHC4	399694	SHC (Src homology 2 domain containing) family, member 4	1 out of 4	89.9717									89.9717	0.0009	fold change	-1.96
HLA-DMA	3108	major histocompatibility complex, class II, DM alpha	1 out of 4	89.9717									89.9717	0.0037	fold change	-1.96
IRX3	79191	iroquois homeobox 3	1 out of 4	89.9054													89.9054	0.0361	fold change	-1.81
GNG2	54331	guanine nucleotide binding protein (G protein), gamma 2	1 out of 4	89.7747	89.7747	0.038	fold change	1.6
R52692	NA		1 out of 4	89.7747	89.7747	0.0076	fold change	1.6
PACRG	135138	PARK2 co-regulated	1 out of 4	89.7747	89.7747	0.0026	fold change	1.6
PAK5	57144	p21 protein (Cdc42/Rac)-activated kinase 7	1 out of 4	89.7747	89.7747	0.0218	fold change	1.6
DGKB	1607	diacylglycerol kinase, beta 90kDa	1 out of 4	89.447	89.447	0.0443	fold change	1.59
GPR137C	283554	G protein-coupled receptor 137C	1 out of 4	89.447	89.447	0.0335	fold change	1.59
SLITRK5	26050	SLIT and NTRK-like family, member 5	1 out of 4	89.447	89.447	0.0441	fold change	1.59
PCGF3	10336	polycomb group ring finger 3	1 out of 4	89.447	89.447	0.0459	fold change	-1.59
RNF125	54941	ring finger protein 125, E3 ubiquitin protein ligase	1 out of 4	89.447									89.447	0.0371	fold change	-1.94
AI125337	NA		1 out of 4	89.447					89.447	0.0327	fold change	-1.42
SOCS6	9306	suppressor of cytokine signaling 6	1 out of 4	89.447					89.447	0.0108	fold change	1.42
CAPG	822	capping protein (actin filament), gelsolin-like	1 out of 4	89.447					89.447	0.0113	fold change	1.42
KLK6	5653	kallikrein-related peptidase 6	1 out of 4	89.447									89.447	0.0115	fold change	-1.94
LOC157503	157503	uncharacterized LOC157503	1 out of 4	89.447	89.447	0.0099	fold change	1.59
MIS18BP1	55320	MIS18 binding protein 1	1 out of 4	89.447					89.447	0.0423	fold change	1.42
ONECUT2	9480	one cut homeobox 2	1 out of 4	89.447					89.447	0.0252	fold change	-1.42
RAD51AP1	10635	RAD51 associated protein 1	1 out of 4	89.447					89.447	0.0216	fold change	1.42
DNAJC12	56521	DnaJ (Hsp40) homolog, subfamily C, member 12	1 out of 4	89.447	89.447	0.0097	fold change	1.59
ANGPT1	284	angiopoietin 1	1 out of 4	89.1886													89.1886	0.0375	fold change	-1.79
SELENOP	6414	selenoprotein P, plasma, 1	1 out of 4	89.1234									89.1234	0.0014	fold change	-1.93
CLK1	1195	CDC-like kinase 1	1 out of 4	89.1234									89.1234	0.0172	fold change	-1.93
SSX2IP	117178	synovial sarcoma, X breakpoint 2 interacting protein	1 out of 4	88.9949	88.9949	0.0399	fold change	1.58
B3GALNT1	8706	beta-1,3-N-acetylgalactosaminyltransferase 1 (globoside blood group)	1 out of 4	88.9949	88.9949	0.0304	fold change	1.58
ZBTB10	65986	zinc finger and BTB domain containing 10	1 out of 4	88.9949	88.9949	0.0008	fold change	1.58
ZNF160	90338	zinc finger protein 160	1 out of 4	88.8652					88.8652	0.0009	fold change	1.41
1556938_a_at	NA		1 out of 4	88.8652					88.8652	0.0373	fold change	-1.41
ELP5	23587	elongator acetyltransferase complex subunit 5	1 out of 4	88.8652					88.8652	0.0081	fold change	1.41
RMDN1	51115	family with sequence similarity 82, member B	1 out of 4	88.8652					88.8652	0.0372	fold change	1.41
DHRS7	51635	dehydrogenase/reductase (SDR family) member 7	1 out of 4	88.8652					88.8652	0.0053	fold change	1.41
SCNN1G	6340	sodium channel, non-voltage-gated 1, gamma subunit	1 out of 4	88.7374									88.7374	0.0334	fold change	1.92
TLR1	7096	toll-like receptor 1	1 out of 4	88.6729													88.6729	0.012	fold change	-1.76
ANKRD36BP2	645784	ankyrin repeat domain 36B pseudogene 2	1 out of 4	88.6101	88.6101	0.0275	fold change	1.57
AL118865	NA		1 out of 4	88.6101	88.6101	0.0481	fold change	1.57
BBS7	55212	Bardet-Biedl syndrome 7	1 out of 4	88.6101	88.6101	0.0452	fold change	1.57
GLCCI1	113263	glucocorticoid induced transcript 1	1 out of 4	88.6101	88.6101	0.0089	fold change	1.57
238212_at	NA		1 out of 4	88.6101	88.6101	0.0242	fold change	1.57
FAM19A4	151647	family with sequence similarity 19 (chemokine (C-C motif)-like), member A4	1 out of 4	88.3548									88.3548	0.0188	fold change	-1.91
AU147515	NA		1 out of 4	88.1648													88.1648	0.0438	fold change	1.74
NPL	80896	N-acetylneuraminate pyruvate lyase (dihydrodipicolinate synthase)	1 out of 4	88.1648													88.1648	0.0097	fold change	-1.74
LDLRAD3	143458	low density lipoprotein receptor class A domain containing 3	1 out of 4	88.1648													88.1648	0.0499	fold change	-1.74
SUB1	10923	SUB1 homolog (S. cerevisiae)	1 out of 4	87.9755	87.9755	0.0356	fold change	1.56
AI199398	NA		1 out of 4	87.9755	87.9755	0.0215	fold change	1.56
PKIA	5569	protein kinase (cAMP-dependent, catalytic) inhibitor alpha	1 out of 4	87.9755	87.9755	0.0356	fold change	1.56
C1orf54	79630	chromosome 1 open reading frame 54	1 out of 4	87.9755					87.9755	0.0039	fold change	1.4
INSM1	3642	insulinoma-associated 1	1 out of 4	87.9755	87.9755	0.024	fold change	1.56
LOC257396	257396	uncharacterized LOC257396	1 out of 4	87.9755									87.9755	0.0002	fold change	1.9
AI734054	NA		1 out of 4	87.9755					87.9755	0.0269	fold change	-1.4
MICAL2	9645	microtubule associated monoxygenase, calponin and LIM domain containing 2	1 out of 4	87.9755					87.9755	0.0448	fold change	-1.4
NUP37	79023	nucleoporin 37kDa	1 out of 4	87.9755					87.9755	0.0002	fold change	1.4
SEMA4D	10507	sema domain, immunoglobulin domain (Ig), transmembrane domain (TM) and short cytoplasmic domain, (semaphorin) 4D	1 out of 4	87.9755									87.9755	0.0178	fold change	-1.9
SDHAF4	135154	chromosome 6 open reading frame 57	1 out of 4	87.9755	87.9755	0.0229	fold change	1.56
CD58	965	CD58 molecule	1 out of 4	87.9755					87.9755	0.0413	fold change	1.4
SOX4	6659	SRY (sex determining region Y)-box 4	1 out of 4	87.9755					87.9755	0.0016	fold change	1.4
KLK7	5650	kallikrein-related peptidase 7	1 out of 4	87.9755									87.9755	0.049	fold change	1.9
SLCO1A2	6579	solute carrier organic anion transporter family, member 1A2	1 out of 4	87.9755									87.9755	0.0325	fold change	-1.9
SAMD9L	219285	sterile alpha motif domain containing 9-like	1 out of 4	87.9755					87.9755	0.0042	fold change	1.4
MARCKS	4082	myristoylated alanine-rich protein kinase C substrate	1 out of 4	87.9755					87.9755	0.0016	fold change	1.4
FAM106A	80039	family with sequence similarity 106, member A	1 out of 4	87.9755					87.9755	0.0081	fold change	-1.4
IFNGR1	3459	interferon gamma receptor 1	1 out of 4	87.7239													87.7239	0.0341	fold change	-1.72
AEBP1	165	AE binding protein 1	1 out of 4	87.7239													87.7239	0.0339	fold change	-1.72
CD24	100133941	CD24 molecule	1 out of 4	87.4738													87.4738	0.0499	fold change	-1.71
WDHD1	11169	WD repeat and HMG-box DNA binding protein 1	1 out of 4	87.4126	87.4126	0.0074	fold change	1.55
NECAP1	25977	NECAP endocytosis associated 1	1 out of 4	87.4126	87.4126	0.0459	fold change	1.55
ACVR1C	130399	activin A receptor, type IC	1 out of 4	87.4126	87.4126	0.038	fold change	1.55
LOC100996419	100996419	uncharacterized LOC100996419	1 out of 4	87.4126	87.4126	0.0117	fold change	1.55
SNAP91	9892	synaptosomal-associated protein, 91kDa homolog (mouse)	1 out of 4	87.4126	87.4126	0.0432	fold change	1.55
RASGRF2	5924	Ras protein-specific guanine nucleotide-releasing factor 2	1 out of 4	87.4126	87.4126	0.0415	fold change	1.55
EFNB3	1949	ephrin-B3	1 out of 4	87.4126	87.4126	0.027	fold change	1.55
FBXL14	144699	F-box and leucine-rich repeat protein 14	1 out of 4	87.4126	87.4126	0.0083	fold change	1.55
NSG2	51617	HMP19 protein	1 out of 4	87.4126	87.4126	0.0415	fold change	1.55
MFNG	4242	MFNG O-fucosylpeptide 3-beta-N-acetylglucosaminyltransferase	1 out of 4	87.1642													87.1642	0.0233	fold change	-1.7
CNOT7	29883	CCR4-NOT transcription complex, subunit 7	1 out of 4	87.0413					87.0413	0.013	fold change	1.39
AK021556	NA		1 out of 4	87.0413					87.0413	0.0152	fold change	-1.39
ATP5PB	515	ATP synthase, H+ transporting, mitochondrial Fo complex, subunit B1	1 out of 4	87.0413					87.0413	0.0329	fold change	1.39
AI475033	NA		1 out of 4	87.0413					87.0413	0.0346	fold change	-1.39
AA777349	NA		1 out of 4	87.0413					87.0413	0.0296	fold change	-1.39
TCAIM	285343	T cell activation inhibitor, mitochondrial	1 out of 4	87.0413					87.0413	0.0253	fold change	1.39
GSDMB	55876	gasdermin B	1 out of 4	87.0413					87.0413	0.01	fold change	-1.39
AI805550	NA		1 out of 4	87.0413					87.0413	0.0447	fold change	-1.39
DUS4L	11062	dihydrouridine synthase 4-like (S. cerevisiae)	1 out of 4	87.0413					87.0413	0.0055	fold change	1.39
MIGA1	374986	family with sequence similarity 73, member A	1 out of 4	87.0413					87.0413	0.0155	fold change	1.39
AF143876	NA		1 out of 4	87.0413					87.0413	0.003	fold change	-1.39
TMEM237	65062	transmembrane protein 237	1 out of 4	87.0413					87.0413	0.0047	fold change	1.39
TM2D1	83941	TM2 domain containing 1	1 out of 4	87.0413					87.0413	0.0276	fold change	1.39
SMAD9	4093	SMAD family member 9	1 out of 4	86.9792													86.9792	0.0132	fold change	-1.69
RASL10A	10633	RAS-like, family 10, member A	1 out of 4	86.9172									86.9172	0.0249	fold change	1.87
RGS5	8490	regulator of G-protein signaling 5	1 out of 4	86.6731	86.6731	0.0033	fold change	-1.54
MIR210HG	100506211	MIR210 host gene (non-protein coding)	1 out of 4	86.6731	86.6731	0.0071	fold change	-1.54
TPM3	7170	tropomyosin 3	1 out of 4	86.6731	86.6731	0.0445	fold change	1.54
KIAA1549L	25758	KIAA1549-like	1 out of 4	86.6731	86.6731	0.0157	fold change	1.54
ZNF826P	664701	zinc finger protein 826, pseudogene	1 out of 4	86.3677	86.3677	0.0187	fold change	1.53
FILIP1	27145	filamin A interacting protein 1	1 out of 4	86.3677	86.3677	0.0384	fold change	1.53
RBP4	5950	retinol binding protein 4, plasma	1 out of 4	86.3677	86.3677	0.0402	fold change	1.53
CITED2	10370	Cbp/p300-interacting transactivator, with Glu/Asp-rich carboxy-terminal domain, 2	1 out of 4	86.3677	86.3677	0.0333	fold change	1.53
SLC39A10	57181	solute carrier family 39 (zinc transporter), member 10	1 out of 4	86.3677	86.3677	0.011	fold change	1.53
HPCAL4	51440	hippocalcin like 4	1 out of 4	86.3677	86.3677	0.0407	fold change	1.53
ANKRD34C	390616	ankyrin repeat domain 34C	1 out of 4	86.3677	86.3677	0.0356	fold change	1.53
FAM49A	81553	family with sequence similarity 49, member A	1 out of 4	86.3677	86.3677	0.0175	fold change	1.53
BCAS1	8537	breast carcinoma amplified sequence 1	1 out of 4	86.3677	86.3677	0.0317	fold change	-1.53
NRXN1	9378	neurexin 1	1 out of 4	86.3677	86.3677	0.0462	fold change	1.53
DOCK8	81704	dedicator of cytokinesis 8	1 out of 4	86.1861									86.1861	0.0279	fold change	-1.86
1555547_at	NA		1 out of 4	86.1861									86.1861	0.0344	fold change	-1.86
BF111326	NA		1 out of 4	86.1861									86.1861	0.0143	fold change	-1.86
RNASE1	6035	ribonuclease, RNase A family, 1 (pancreatic)	1 out of 4	85.8856									85.8856	0.0222	fold change	-1.85
CARNS1	57571	carnosine synthase 1	1 out of 4	85.8856									85.8856	0.0173	fold change	-1.85
AA504245	NA		1 out of 4	85.8856													85.8856	0.0125	fold change	-1.66
NCBP3	55421	chromosome 17 open reading frame 85	1 out of 4	85.8856									85.8856	0.035	fold change	-1.85
KCNJ2	3759	potassium inwardly-rectifying channel, subfamily J, member 2	1 out of 4	85.8856									85.8856	0.0194	fold change	-1.85
GPR160	26996	G protein-coupled receptor 160	1 out of 4	85.8856													85.8856	0.0231	fold change	-1.66
CROT	54677	carnitine O-octanoyltransferase	1 out of 4	85.8856									85.8856	0.0369	fold change	1.85
PTBP2	58155	polypyrimidine tract binding protein 2	1 out of 4	85.706					85.706	0.0298	fold change	1.38
MPEG1	219972	macrophage expressed 1	1 out of 4	85.706					85.706	0.0472	fold change	1.38
OTUD1	220213	OTU domain containing 1	1 out of 4	85.706					85.706	0.0165	fold change	1.38
CCT6B	10693	chaperonin containing TCP1, subunit 6B (zeta 2)	1 out of 4	85.706					85.706	0.0288	fold change	1.38
Hs.687402	NA		1 out of 4	85.706					85.706	0.0171	fold change	-1.38
Hs.687551	NA		1 out of 4	85.706					85.706	0.0373	fold change	-1.38
RRAGB	10325	Ras-related GTP binding B	1 out of 4	85.706					85.706	0.0396	fold change	1.38
RFXAP	5994	regulatory factor X-associated protein	1 out of 4	85.706					85.706	0.0043	fold change	1.38
ACADL	33	acyl-CoA dehydrogenase, long chain	1 out of 4	85.706					85.706	0.0011	fold change	1.38
NEDD4L	23327	neural precursor cell expressed, developmentally down-regulated 4-like, E3 ubiquitin protein ligase	1 out of 4	85.706					85.706	0.0099	fold change	-1.38
PPFIBP1	8496	PTPRF interacting protein, binding protein 1 (liprin beta 1)	1 out of 4	85.706					85.706	0.0006	fold change	-1.38
AU146285	NA		1 out of 4	85.706					85.706	0.0417	fold change	-1.38
TMEM128	85013	transmembrane protein 128	1 out of 4	85.706					85.706	0.0414	fold change	1.38
MEG3	55384	maternally expressed 3 (non-protein coding)	1 out of 4	85.706					85.706	0.0215	fold change	-1.38
DPP8	54878	dipeptidyl-peptidase 8	1 out of 4	85.706					85.706	0.0079	fold change	1.38
FZD3	7976	frizzled family receptor 3	1 out of 4	85.6458	85.6458	0.0101	fold change	1.52
ARHGEF7	8874	Rho guanine nucleotide exchange factor (GEF) 7	1 out of 4	85.6458	85.6458	0.0271	fold change	1.52
SLC16A7	9194	solute carrier family 16, member 7 (monocarboxylic acid transporter 2)	1 out of 4	85.6458	85.6458	0.0284	fold change	1.52
GOSR2	9570	golgi SNAP receptor complex member 2	1 out of 4	85.6458	85.6458	0.0042	fold change	1.52
SSBP2	23635	single-stranded DNA binding protein 2	1 out of 4	85.6458	85.6458	0.0298	fold change	1.52
ADAM23	8745	ADAM metallopeptidase domain 23	1 out of 4	85.6458	85.6458	0.0103	fold change	1.52
LAMB1	3912	laminin, beta 1	1 out of 4	85.6458	85.6458	0.0467	fold change	1.52
BMT2	154743	chromosome 7 open reading frame 60	1 out of 4	85.6458	85.6458	0.0054	fold change	1.52
ARMCX4	100131755	armadillo repeat containing, X-linked 4	1 out of 4	85.6458	85.6458	0.0308	fold change	1.52
DBNDD2	55861	dysbindin (dystrobrevin binding protein 1) domain containing 2	1 out of 4	85.5271									85.5271	0.0157	fold change	-1.84
ARL4C	10123	ADP-ribosylation factor-like 4C	1 out of 4	85.5271													85.5271	0.0237	fold change	1.65
CAPN3	825	calpain 3, (p94)	1 out of 4	85.5271									85.5271	0.0286	fold change	-1.84
RBM26-AS1	100505538	RBM26 antisense RNA 1	1 out of 4	85.5271													85.5271	0.0406	fold change	1.65
DOK3	79930	docking protein 3	1 out of 4	85.5271													85.5271	0.0018	fold change	-1.65
LRP12	29967	low density lipoprotein receptor-related protein 12	1 out of 4	85.5271									85.5271	0.0489	fold change	1.84
AW195492	NA		1 out of 4	85.5271									85.5271	0.0431	fold change	-1.84
GPLD1	2822	glycosylphosphatidylinositol specific phospholipase D1	1 out of 4	84.995	84.995	0.0378	fold change	1.51
MAP3K8	1326	mitogen-activated protein kinase kinase kinase 8	1 out of 4	84.995	84.995	0.0293	fold change	-1.51
CD200	4345	CD200 molecule	1 out of 4	84.995	84.995	0.0268	fold change	1.51
PRPH2	5961	peripherin 2 (retinal degeneration, slow)	1 out of 4	84.995	84.995	0.0436	fold change	1.51
ZNF204P	7754	zinc finger protein 204, pseudogene	1 out of 4	84.995	84.995	0.0381	fold change	1.51
SPATA1	100505741	spermatogenesis associated 1	1 out of 4	84.9358									84.9358	0.0008	fold change	1.83
WDR20	91833	WD repeat domain 20	1 out of 4	84.9358									84.9358	0.0362	fold change	-1.83
MYO1D	4642	myosin ID	1 out of 4	84.9358									84.9358	0.0263	fold change	-1.83
RAB33A	9363	RAB33A, member RAS oncogene family	1 out of 4	84.9358									84.9358	0.0245	fold change	-1.83
DHCR7	1717	7-dehydrocholesterol reductase	1 out of 4	84.8191													84.8191	0.0448	fold change	-1.63
TST	7263	thiosulfate sulfurtransferase (rhodanese)	1 out of 4	84.8191													84.8191	0.0282	fold change	-1.63
MAP3K2	10746	mitogen-activated protein kinase kinase kinase 2	1 out of 4	84.6439					84.6439	0.0035	fold change	1.37
TSEN15	116461	tRNA splicing endonuclease 15 homolog (S. cerevisiae)	1 out of 4	84.6439					84.6439	0.0142	fold change	1.37
LACTB2	51110	lactamase, beta 2	1 out of 4	84.6439					84.6439	0.0252	fold change	1.37
LOC101928906	101928906		1 out of 4	84.6439					84.6439	0.0286	fold change	1.37
SCAMP1-AS1	728769	uncharacterized LOC728769	1 out of 4	84.6439					84.6439	0.0297	fold change	1.37
KIF11	3832	kinesin family member 11	1 out of 4	84.6439					84.6439	0.0202	fold change	1.37
ST3GAL6	10402	ST3 beta-galactoside alpha-2,3-sialyltransferase 6	1 out of 4	84.6439					84.6439	0.0364	fold change	1.37
GSPT1	2935	G1 to S phase transition 1	1 out of 4	84.6439					84.6439	0.0203	fold change	1.37
CTDSPL2	51496	CTD (carboxy-terminal domain, RNA polymerase II, polypeptide A) small phosphatase like 2	1 out of 4	84.6439					84.6439	0.0047	fold change	1.37
LRRC34	151827	leucine rich repeat containing 34	1 out of 4	84.6439					84.6439	0.0216	fold change	1.37
KMT5B	51111	suppressor of variegation 4-20 homolog 1 (Drosophila)	1 out of 4	84.6439					84.6439	0.008	fold change	1.37
AF127481	NA		1 out of 4	84.6439					84.6439	0.0403	fold change	1.37
RRN3P1	730092	RNA polymerase I transcription factor homolog (S. cerevisiae) pseudogene 1	1 out of 4	84.6439					84.6439	0.0056	fold change	1.37
AU146939	NA		1 out of 4	84.6439					84.6439	0.022	fold change	-1.37
NOL4	8715	nucleolar protein 4	1 out of 4	84.468	84.468	0.0103	fold change	1.5
PTER	9317	phosphotriesterase related	1 out of 4	84.468	84.468	0.0278	fold change	1.5
AI097501	NA		1 out of 4	84.468	84.468	0.0484	fold change	1.5
FAM182A	284800	family with sequence similarity 182, member A	1 out of 4	84.468	84.468	0.0473	fold change	1.5
ECT2	1894	epithelial cell transforming sequence 2 oncogene	1 out of 4	84.468	84.468	0.0203	fold change	1.5
LMO7	4008	LIM domain 7	1 out of 4	84.468	84.468	0.0431	fold change	1.5
EGR3	1960	early growth response 3	1 out of 4	84.468	84.468	0.0325	fold change	1.5
GPR176	11245	G protein-coupled receptor 176	1 out of 4	84.468	84.468	0.0105	fold change	1.5
PAK1	5058	p21 protein (Cdc42/Rac)-activated kinase 1	1 out of 4	84.468	84.468	0.038	fold change	1.5
GPR158	57512	G protein-coupled receptor 158	1 out of 4	84.468	84.468	0.0325	fold change	1.5
TCP11L2	255394	t-complex 11, testis-specific-like 2	1 out of 4	84.3526									84.3526	0.0019	fold change	-1.82
BE551407	NA		1 out of 4	84.3526									84.3526	0.0085	fold change	-1.82
PTPRG	5793	protein tyrosine phosphatase, receptor type, G	1 out of 4	84.3526									84.3526	0.0329	fold change	1.82
ANGPTL4	51129	angiopoietin-like 4	1 out of 4	84.3526													84.3526	0.0322	fold change	-1.61
MYRF	745	chromosome 11 open reading frame 9	1 out of 4	84.3526									84.3526	0.016	fold change	-1.82
ALS2	57679	amyotrophic lateral sclerosis 2 (juvenile)	1 out of 4	84.3526									84.3526	0.0363	fold change	1.82
HPSE	10855	heparanase	1 out of 4	84.3526													84.3526	0.0219	fold change	-1.61
KCTD12	115207	potassium channel tetramerisation domain containing 12	1 out of 4	83.8349									83.8349	0.0019	fold change	-1.81
LNPEP	4012	leucyl/cystinyl aminopeptidase	1 out of 4	83.8349									83.8349	0.0188	fold change	1.81
FRMD5	84978	FERM domain containing 5	1 out of 4	83.8349									83.8349	0.0035	fold change	-1.81
FNBP4	23360	formin binding protein 4	1 out of 4	83.7774													83.7774	0.0314	fold change	-1.6
REEP1	65055	receptor accessory protein 1	1 out of 4	83.6064	83.6064	0.0286	fold change	1.49
Hs.621281	NA		1 out of 4	83.6064	83.6064	0.027	fold change	-1.49
AW206560	NA		1 out of 4	83.6064	83.6064	0.0467	fold change	-1.49
PNMA2	10687	paraneoplastic Ma antigen 2	1 out of 4	83.6064	83.6064	0.0499	fold change	1.49
PRKG1	5592	protein kinase, cGMP-dependent, type I	1 out of 4	83.6064	83.6064	0.0006	fold change	1.49
IGSF3	3321	immunoglobulin superfamily, member 3	1 out of 4	83.6064	83.6064	0.0131	fold change	1.49
DPY19L2P2	349152	dpy-19-like 2 pseudogene 2 (C. elegans)	1 out of 4	83.6064	83.6064	0.0262	fold change	1.49
GPRASP1	9737	G protein-coupled receptor associated sorting protein 1	1 out of 4	83.6064	83.6064	0.0411	fold change	1.49
TENM2	57451	teneurin transmembrane protein 2	1 out of 4	83.6064	83.6064	0.0392	fold change	1.49
KIAA0408	9729	KIAA0408	1 out of 4	83.6064	83.6064	0.0027	fold change	1.49
BC035108	NA		1 out of 4	83.3806									83.3806	0.0329	fold change	1.8
LMF1	64788	lipase maturation factor 1	1 out of 4	83.3806									83.3806	0.0224	fold change	-1.8
COL4A5	1287	collagen, type IV, alpha 5	1 out of 4	83.3806									83.3806	0.0174	fold change	-1.8
Hs.132937.0.A1_3p_at	NA		1 out of 4	83.3806									83.3806	0.0178	fold change	-1.8
GGTA1P	2681	glycoprotein, alpha-galactosyltransferase 1 pseudogene	1 out of 4	83.2113					83.2113	0.0074	fold change	1.36
UST-AS1	100128176	uncharacterized LOC100128176	1 out of 4	83.2113					83.2113	0.0322	fold change	1.36
AI492388	NA		1 out of 4	83.2113					83.2113	0.0493	fold change	-1.36
DBT	1629	dihydrolipoamide branched chain transacylase E2	1 out of 4	83.2113					83.2113	0.0035	fold change	1.36
HACL1	26061	2-hydroxyacyl-CoA lyase 1	1 out of 4	83.2113					83.2113	0.0228	fold change	1.36
TTC30A	92104	tetratricopeptide repeat domain 30A	1 out of 4	83.2113					83.2113	0.037	fold change	1.36
MCM4	4173	minichromosome maintenance complex component 4	1 out of 4	83.2113					83.2113	0.0047	fold change	1.36
AL832082	NA		1 out of 4	83.2113					83.2113	0.0192	fold change	-1.36
SLC2A14	144195	solute carrier family 2 (facilitated glucose transporter), member 14	1 out of 4	83.0427													83.0427	0.0375	fold change	-1.58
PILRA	29992	paired immunoglobin-like type 2 receptor alpha	1 out of 4	82.9297									82.9297	0.0007	fold change	-1.79
TMEM235	283999	transmembrane protein 235	1 out of 4	82.9297									82.9297	0.0325	fold change	-1.79
LARGE1	9215	like-glycosyltransferase	1 out of 4	82.9297									82.9297	0.0221	fold change	1.79
PRR5L	79899	proline rich 5 like	1 out of 4	82.9297									82.9297	0.0235	fold change	-1.79
ALCAM	214	activated leukocyte cell adhesion molecule	1 out of 4	82.9297									82.9297	0.0319	fold change	-1.79
GRAMD2A	196996	GRAM domain containing 2	1 out of 4	82.7623	82.7623	0.0284	fold change	1.48
HDAC9	9734	histone deacetylase 9	1 out of 4	82.7623	82.7623	0.0066	fold change	1.48
CKAP2	26586	cytoskeleton associated protein 2	1 out of 4	82.7623	82.7623	0.0205	fold change	1.48
LRRC8B	23507	leucine rich repeat containing 8 family, member B	1 out of 4	82.7623	82.7623	0.0455	fold change	1.48
PPP4R1L	55370	protein phosphatase 4, regulatory subunit 1-like	1 out of 4	82.6515													82.6515	0.0327	fold change	-1.57
TMEM97	27346	transmembrane protein 97	1 out of 4	82.3737	82.3737	0.0143	fold change	1.47
ANKRD50	57182	ankyrin repeat domain 50	1 out of 4	82.3737	82.3737	0.0061	fold change	1.47
EML5	161436	echinoderm microtubule associated protein like 5	1 out of 4	82.3737	82.3737	0.0172	fold change	1.47
HPCAL1	3241	hippocalcin-like 1	1 out of 4	82.3737	82.3737	0.0155	fold change	1.47
LOC93622	93622	Morf4 family associated protein 1-like 1 pseudogene	1 out of 4	82.3737	82.3737	0.0059	fold change	1.47
MPP7	143098	membrane protein, palmitoylated 7 (MAGUK p55 subfamily member 7)	1 out of 4	82.3737	82.3737	0.0161	fold change	1.47
PLPPR5	163404	lipid phosphate phosphatase-related protein type 5	1 out of 4	82.3737	82.3737	0.046	fold change	1.47
DHRS2	10202	dehydrogenase/reductase (SDR family) member 2	1 out of 4	82.3737	82.3737	0.0073	fold change	1.47
COPG2IT1	53844	COPG2 imprinted transcript 1 (non-protein coding)	1 out of 4	82.3737	82.3737	0.0404	fold change	1.47
SEMA3C	10512	sema domain, immunoglobulin domain (Ig), short basic domain, secreted, (semaphorin) 3C	1 out of 4	82.3737	82.3737	0.0236	fold change	1.47
RAB39B	116442	RAB39B, member RAS oncogene family	1 out of 4	82.3737	82.3737	0.0292	fold change	1.47
RNASEH2B	79621	ribonuclease H2, subunit B	1 out of 4	82.3737	82.3737	0.0091	fold change	1.47
SLC16A14	151473	solute carrier family 16, member 14 (monocarboxylic acid transporter 14)	1 out of 4	82.3737	82.3737	0.0455	fold change	1.47
BC029799	NA		1 out of 4	82.3737	82.3737	0.0186	fold change	1.47
TNS1	7145	tensin 1	1 out of 4	82.3737	82.3737	0.0034	fold change	-1.47
ASAH2B	653308	N-acylsphingosine amidohydrolase (non-lysosomal ceramidase) 2B	1 out of 4	82.3737	82.3737	0.0374	fold change	1.47
ALOX15B	247	arachidonate 15-lipoxygenase, type B	1 out of 4	82.3737	82.3737	0.0089	fold change	-1.47
VEGFA	7422	vascular endothelial growth factor A	1 out of 4	82.3737	82.3737	0.0221	fold change	-1.47
SLC27A2	11001	solute carrier family 27 (fatty acid transporter), member 2	1 out of 4	82.2084									82.2084	0.0248	fold change	1.77
MT1X	4501	metallothionein 1X	1 out of 4	82.2084													82.2084	0.0499	fold change	-1.56
CPOX	1371	coproporphyrinogen oxidase	1 out of 4	81.88									81.88	0.0257	fold change	-1.76
SNX4	8723	sorting nexin 4	1 out of 4	81.88					81.88	0.025	fold change	1.35
AF052176	NA		1 out of 4	81.88					81.88	0.0438	fold change	-1.35
B4GALT6	9331	UDP-Gal:betaGlcNAc beta 1,4- galactosyltransferase, polypeptide 6	1 out of 4	81.88									81.88	0.0389	fold change	1.76
ADCY10P1	221442	adenylate cyclase 10 (soluble) pseudogene 1	1 out of 4	81.88									81.88	0.0218	fold change	-1.76
GIMAP4	55303	GTPase, IMAP family member 4	1 out of 4	81.88									81.88	0.0287	fold change	-1.76
MIER3	166968	mesoderm induction early response 1, family member 3	1 out of 4	81.88					81.88	0.0155	fold change	1.35
H40696	NA		1 out of 4	81.88					81.88	0.0251	fold change	1.35
GALNT7	51809	UDP-N-acetyl-alpha-D-galactosamine:polypeptide N-acetylgalactosaminyltransferase 7 (GalNAc-T7)	1 out of 4	81.88					81.88	0.0314	fold change	1.35
PDSS2	57107	prenyl (decaprenyl) diphosphate synthase, subunit 2	1 out of 4	81.88					81.88	0.0016	fold change	1.35
MED14	9282	mediator complex subunit 14	1 out of 4	81.88					81.88	0.0402	fold change	1.35
AI088099	NA		1 out of 4	81.88					81.88	0.0069	fold change	-1.35
LOC105379426	105379426		1 out of 4	81.88					81.88	0.0369	fold change	-1.35
GALNT6	11226	UDP-N-acetyl-alpha-D-galactosamine:polypeptide N-acetylgalactosaminyltransferase 6 (GalNAc-T6)	1 out of 4	81.88					81.88	0.0431	fold change	1.35
LOC284926	284926	uncharacterized LOC284926	1 out of 4	81.88					81.88	0.0125	fold change	1.35
SOX8	30812	SRY (sex determining region Y)-box 8	1 out of 4	81.88									81.88	0.0127	fold change	-1.76
NAB1	4664	NGFI-A binding protein 1 (EGR1 binding protein 1)	1 out of 4	81.88					81.88	0.0467	fold change	1.35
AI653673	NA		1 out of 4	81.88					81.88	0.0058	fold change	-1.35
KLHL23	151230	kelch-like 23 (Drosophila)	1 out of 4	81.88									81.88	0.0015	fold change	1.76
MCM6	4175	minichromosome maintenance complex component 6	1 out of 4	81.88					81.88	0.0178	fold change	1.35
AU144382	NA		1 out of 4	81.88					81.88	0.0325	fold change	-1.35
BF509211	NA		1 out of 4	81.88					81.88	0.0014	fold change	-1.35
DHFR2	200895	dihydrofolate reductase-like 1	1 out of 4	81.88					81.88	0.0116	fold change	1.35
NM_018612	NA		1 out of 4	81.88									81.88	0.0236	fold change	-1.76
ROR1	4919	receptor tyrosine kinase-like orphan receptor 1	1 out of 4	81.7715													81.7715	0.0498	fold change	1.55
VPS13C	54832	vacuolar protein sorting 13 homolog C (S. cerevisiae)	1 out of 4	81.7715													81.7715	0.017	fold change	-1.55
C2orf88	84281	chromosome 2 open reading frame 88	1 out of 4	81.7715													81.7715	0.0102	fold change	-1.55
EHBP1L1	254102	EH domain binding protein 1-like 1	1 out of 4	81.7715													81.7715	0.0191	fold change	-1.55
ADGRL2	23266	latrophilin 2	1 out of 4	81.1781	81.1781	0.0498	fold change	1.46
BAG5	9529	BCL2-associated athanogene 5	1 out of 4	81.1781	81.1781	0.0124	fold change	1.46
SREK1	140890	splicing regulatory glutamine/lysine-rich protein 1	1 out of 4	81.1781	81.1781	0.0106	fold change	1.46
H23551	NA		1 out of 4	81.1781	81.1781	0.0256	fold change	1.46
LIN7A	8825	lin-7 homolog A (C. elegans)	1 out of 4	81.1781	81.1781	0.0312	fold change	1.46
PHF14	9678	PHD finger protein 14	1 out of 4	81.1781	81.1781	0.0339	fold change	1.46
SMKR1	100287482	uncharacterized LOC100287482	1 out of 4	81.1781	81.1781	0.0207	fold change	1.46
AW273830	NA		1 out of 4	81.1781	81.1781	0.039	fold change	-1.46
AF086134	NA		1 out of 4	81.1781	81.1781	0.0086	fold change	-1.46
NAALAD2	10003	N-acetylated alpha-linked acidic dipeptidase 2	1 out of 4	81.1781	81.1781	0.0246	fold change	1.46
GLDN	342035	gliomedin	1 out of 4	81.0701									81.0701	0.0325	fold change	-1.75
TRIM59	286827	tripartite motif containing 59	1 out of 4	81.0701									81.0701	0.0486	fold change	-1.75
PNPT1	87178	polyribonucleotide nucleotidyltransferase 1	1 out of 4	81.0701									81.0701	0.0132	fold change	-1.75
ADCYAP1	116	adenylate cyclase activating polypeptide 1 (pituitary)	1 out of 4	81.0701									81.0701	0.0095	fold change	1.75
AKR1C2	1646	aldo-keto reductase family 1, member C2 (dihydrodiol dehydrogenase 2; bile acid binding protein; 3-alpha hydroxysteroid dehydrogenase, type III)	1 out of 4	80.8564													80.8564	0.0221	fold change	-1.54
NT5DC1	221294	5'-nucleotidase domain containing 1	1 out of 4	80.5919									80.5919	0.0215	fold change	-1.74
HSPA2	3306	heat shock 70kDa protein 2	1 out of 4	80.5919									80.5919	0.0019	fold change	-1.74
ERMN	57471	ermin, ERM-like protein	1 out of 4	80.5919									80.5919	0.0276	fold change	-1.74
AI521765	NA		1 out of 4	80.5919									80.5919	0.0033	fold change	-1.74
DLL1	28514	delta-like 1 (Drosophila)	1 out of 4	80.5919									80.5919	0.0249	fold change	-1.74
NLRP2	55655	NLR family, pyrin domain containing 2	1 out of 4	80.5919									80.5919	0.0154	fold change	1.74
CDK18	5129	cyclin-dependent kinase 18	1 out of 4	80.5919									80.5919	0.0049	fold change	-1.74
H92979	NA		1 out of 4	80.5919									80.5919	0.0074	fold change	-1.74
ID4	3400	inhibitor of DNA binding 4, dominant negative helix-loop-helix protein	1 out of 4	80.5386													80.5386	0.0094	fold change	-1.53
243134_at	NA		1 out of 4	80.5386													80.5386	0.0379	fold change	-1.53
MBNL3	55796	muscleblind-like splicing regulator 3	1 out of 4	80.4868					80.4868	0.0098	fold change	1.34
HERC5	51191	HECT and RLD domain containing E3 ubiquitin protein ligase 5	1 out of 4	80.4868					80.4868	0.0469	fold change	1.34
AI761498	NA		1 out of 4	80.4868					80.4868	0.0117	fold change	-1.34
LPXN	9404	leupaxin	1 out of 4	80.4868					80.4868	0.0079	fold change	1.34
AU151465	NA		1 out of 4	80.4868					80.4868	0.0263	fold change	-1.34
Hs.177398.0.A1_3p_at	NA		1 out of 4	80.4868					80.4868	0.0252	fold change	-1.34
1566098_at	NA		1 out of 4	80.4868					80.4868	0.0213	fold change	-1.34
AL833742	NA		1 out of 4	80.4868					80.4868	0.0305	fold change	-1.34
XRCC4	7518	X-ray repair complementing defective repair in Chinese hamster cells 4	1 out of 4	80.4868					80.4868	0.0222	fold change	1.34
LINC00909	400657	uncharacterized LOC400657	1 out of 4	80.4868					80.4868	0.0399	fold change	1.34
CALCRL	10203	calcitonin receptor-like	1 out of 4	80.4868					80.4868	0.0097	fold change	1.34
TRMT10A	93587	tRNA methyltransferase 10 homolog A (S. cerevisiae)	1 out of 4	80.4868					80.4868	0.0028	fold change	1.34
NPM1	4869	nucleophosmin (nucleolar phosphoprotein B23, numatrin)	1 out of 4	80.4868					80.4868	0.0068	fold change	1.34
SDCCAG8	10806	serologically defined colon cancer antigen 8	1 out of 4	80.4868					80.4868	0.0125	fold change	1.34
CHEK1	1111	checkpoint kinase 1	1 out of 4	80.4868					80.4868	0.0145	fold change	1.34
LOC374443	374443	C-type lectin domain family 2, member D pseudogene	1 out of 4	80.4868					80.4868	0.0082	fold change	1.34
BC027905	NA		1 out of 4	80.4868					80.4868	0.0269	fold change	-1.34
LATS2	26524	LATS, large tumor suppressor, homolog 2 (Drosophila)	1 out of 4	80.4868					80.4868	0.0274	fold change	-1.34
DIMT1	27292	DIM1 dimethyladenosine transferase 1 homolog (S. cerevisiae)	1 out of 4	80.4868					80.4868	0.0104	fold change	1.34
NYAP2	57624	neuronal tyrosine-phosphorylated phosphoinositide-3-kinase adaptor 2	1 out of 4	80.4868					80.4868	0.0385	fold change	-1.34
LOC158863	158863	uncharacterized LOC158863	1 out of 4	80.4868					80.4868	0.0256	fold change	-1.34
AI678013	NA		1 out of 4	80.4868					80.4868	0.036	fold change	-1.34
SYNPO	11346	synaptopodin	1 out of 4	80.4868					80.4868	0.0285	fold change	-1.34
BTG3	10950	BTG family, member 3	1 out of 4	80.4337	80.4337	0.0246	fold change	1.45
MAP2	4133	microtubule-associated protein 2	1 out of 4	80.4337	80.4337	0.0315	fold change	1.45
CDH10	1008	cadherin 10, type 2 (T2-cadherin)	1 out of 4	80.4337	80.4337	0.019	fold change	1.45
JAZF1	221895	JAZF zinc finger 1	1 out of 4	80.4337	80.4337	0.0119	fold change	1.45
AL043482	NA		1 out of 4	80.4337	80.4337	0.007	fold change	1.45
DBP	1628	D site of albumin promoter (albumin D-box) binding protein	1 out of 4	80.4337	80.4337	0.0033	fold change	1.45
GPATCH2	55105	G patch domain containing 2	1 out of 4	80.4337	80.4337	0.0033	fold change	1.45
CACNA2D1	781	calcium channel, voltage-dependent, alpha 2/delta subunit 1	1 out of 4	80.4337	80.4337	0.0424	fold change	1.45
JAG1	182	jagged 1	1 out of 4	80.4337	80.4337	0.0325	fold change	1.45
C9orf40	55071	chromosome 9 open reading frame 40	1 out of 4	80.4337	80.4337	0.0031	fold change	1.45
FKBP5	2289	FK506 binding protein 5	1 out of 4	80.4337	80.4337	0.0035	fold change	-1.45
ATP8A2	51761	ATPase, aminophospholipid transporter, class I, type 8A, member 2	1 out of 4	80.4337	80.4337	0.0084	fold change	1.45
BBS12	166379	Bardet-Biedl syndrome 12	1 out of 4	80.4337	80.4337	0.0448	fold change	1.45
BE671251	NA		1 out of 4	80.0154													80.0154	0.0018	fold change	1.52
PBX3	5090	pre-B-cell leukemia homeobox 3	1 out of 4	80.0154													80.0154	0.0272	fold change	-1.52
ATOH7	220202	atonal homolog 7 (Drosophila)	1 out of 4	79.9105									79.9105	0.0277	fold change	1.73
GBP2	2634	guanylate binding protein 2, interferon-inducible	1 out of 4	79.9105									79.9105	0.0339	fold change	-1.73
SEC14L2	23541	SEC14-like 2 (S. cerevisiae)	1 out of 4	79.9105									79.9105	0.0299	fold change	1.73
EPHB6	2051	EPH receptor B6	1 out of 4	79.9105									79.9105	0.0122	fold change	1.73
PANK2	80025	pantothenate kinase 2	1 out of 4	79.9105									79.9105	0.0158	fold change	1.73
LOC100505874	100505874	uncharacterized LOC100505874	1 out of 4	79.6521													79.6521	0.0314	fold change	1.51
ZNF367	195828	zinc finger protein 367	1 out of 4	79.6521													79.6521	0.0341	fold change	-1.51
STARD4	134429	StAR-related lipid transfer (START) domain containing 4	1 out of 4	79.6521													79.6521	0.0134	fold change	-1.51
COTL1	23406	coactosin-like 1 (Dictyostelium)	1 out of 4	79.6521													79.6521	0.0471	fold change	-1.51
SPICE1	152185	spindle and centriole associated protein 1	1 out of 4	79.3437	79.3437	0.0005	fold change	1.44
YPEL1	29799	yippee-like 1 (Drosophila)	1 out of 4	79.3437	79.3437	0.0442	fold change	1.44
FRRS1L	23732	ferric-chelate reductase 1-like	1 out of 4	79.3437	79.3437	0.0418	fold change	1.44
GRHL1	29841	grainyhead-like 1 (Drosophila)	1 out of 4	79.3437	79.3437	0.0338	fold change	1.44
PSD3	23362	pleckstrin and Sec7 domain containing 3	1 out of 4	79.3437	79.3437	0.0375	fold change	1.44
FAM78B	149297	family with sequence similarity 78, member B	1 out of 4	79.3437	79.3437	0.0378	fold change	1.44
FRMPD4	9758	FERM and PDZ domain containing 4	1 out of 4	79.3437	79.3437	0.0444	fold change	1.44
ACVR2A	92	activin A receptor, type IIA	1 out of 4	79.3437	79.3437	0.0186	fold change	1.44
SRSF12	135295	serine/arginine-rich splicing factor 12	1 out of 4	79.3437	79.3437	0.0063	fold change	1.44
PATJ	10207	InaD-like (Drosophila)	1 out of 4	79.3437	79.3437	0.0333	fold change	1.44
MKL2	57496	MKL/myocardin-like 2	1 out of 4	79.3437	79.3437	0.015	fold change	1.44
TSC22D2	9819	TSC22 domain family, member 2	1 out of 4	79.3437	79.3437	0.0041	fold change	1.44
RASGRP1	10125	RAS guanyl releasing protein 1 (calcium and DAG-regulated)	1 out of 4	79.3437	79.3437	0.0267	fold change	1.44
FAM3C	10447	family with sequence similarity 3, member C	1 out of 4	79.3437	79.3437	0.0457	fold change	1.44
SSR1	6745	signal sequence receptor, alpha	1 out of 4	79.2406													79.2406	0.0259	fold change	-1.5
TMEM206	55248	transmembrane protein 206	1 out of 4	79.2406									79.2406	0.0258	fold change	-1.72
LDLRAP1	26119	low density lipoprotein receptor adaptor protein 1	1 out of 4	79.2406									79.2406	0.0024	fold change	-1.72
PDE8A	5151	phosphodiesterase 8A	1 out of 4	79.2406									79.2406	0.0253	fold change	-1.72
PLPP2	8612	phosphatidic acid phosphatase type 2C	1 out of 4	79.2406									79.2406	0.0233	fold change	-1.72
RNF19A	25897	ring finger protein 19A, E3 ubiquitin protein ligase	1 out of 4	79.2406													79.2406	0.0208	fold change	-1.5
TET1	80312	tet methylcytosine dioxygenase 1	1 out of 4	78.8345					78.8345	0.0345	fold change	1.33
AW205607	NA		1 out of 4	78.8345					78.8345	0.0119	fold change	-1.33
GCLC	2729	glutamate-cysteine ligase, catalytic subunit	1 out of 4	78.8345					78.8345	0.0085	fold change	1.33
RXYLT1	10329	transmembrane protein 5	1 out of 4	78.8345					78.8345	0.0204	fold change	1.33
AL137541	NA		1 out of 4	78.8345					78.8345	0.0462	fold change	-1.33
SEPSECS	51091	Sep (O-phosphoserine) tRNA:Sec (selenocysteine) tRNA synthase	1 out of 4	78.8345					78.8345	0.0037	fold change	1.33
KIN	22944	KIN, antigenic determinant of recA protein homolog (mouse)	1 out of 4	78.8345					78.8345	0.0021	fold change	1.33
VRK2	7444	vaccinia related kinase 2	1 out of 4	78.8345									78.8345	0.0381	fold change	-1.71
C4orf46	201725	chromosome 4 open reading frame 46	1 out of 4	78.8345					78.8345	0.0081	fold change	1.33
MDP1	145553	magnesium-dependent phosphatase 1	1 out of 4	78.8345					78.8345	0.0471	fold change	1.33
PSMA3	5684	proteasome (prosome, macropain) subunit, alpha type, 3	1 out of 4	78.8345					78.8345	0.0257	fold change	1.33
H49382	NA		1 out of 4	78.8345									78.8345	0.0045	fold change	-1.71
AI870903	NA		1 out of 4	78.8345					78.8345	0.0171	fold change	1.33
TAS2R14	50840	taste receptor, type 2, member 14	1 out of 4	78.8345					78.8345	0.038	fold change	1.33
MX1	4599	myxovirus (influenza virus) resistance 1, interferon-inducible protein p78 (mouse)	1 out of 4	78.8345					78.8345	0.0315	fold change	1.33
SUN1	23353	Sad1 and UNC84 domain containing 1	1 out of 4	78.8345					78.8345	0.049	fold change	1.33
AL134012	NA		1 out of 4	78.8345					78.8345	0.0343	fold change	-1.33
AI480014	NA		1 out of 4	78.8345					78.8345	0.025	fold change	-1.33
SIPA1L3	23094	signal-induced proliferation-associated 1 like 3	1 out of 4	78.8345					78.8345	0.0433	fold change	-1.33
NCK1-AS1	101927597		1 out of 4	78.8345					78.8345	0.0165	fold change	1.33
TRIM6	117854	tripartite motif containing 6	1 out of 4	78.8345					78.8345	0.0211	fold change	1.33
JKAMP	51528	JNK1/MAPK8-associated membrane protein	1 out of 4	78.8345					78.8345	0.0172	fold change	1.33
SHROOM4	57477	shroom family member 4	1 out of 4	78.8345									78.8345	0.0076	fold change	-1.71
PGM2	55276	phosphoglucomutase 2	1 out of 4	78.7836													78.7836	0.0271	fold change	-1.49
PGM5P2	595135	phosphoglucomutase 5 pseudogene 2	1 out of 4	78.7836													78.7836	0.0006	fold change	-1.49
AL050097	NA		1 out of 4	78.3822									78.3822	0.0015	fold change	-1.7
ZNF600	162966	zinc finger protein 600	1 out of 4	78.3822									78.3822	0.0084	fold change	-1.7
DNA2	1763	DNA replication helicase 2 homolog (yeast)	1 out of 4	78.3822									78.3822	0.0214	fold change	-1.7
AI830471	NA		1 out of 4	78.3822									78.3822	0.0449	fold change	1.7
ATG4C	84938	autophagy related 4C, cysteine peptidase	1 out of 4	78.3822									78.3822	0.015	fold change	-1.7
CALHM6	441168	family with sequence similarity 26, member F	1 out of 4	78.3822									78.3822	0.0224	fold change	-1.7
1556054_at	NA		1 out of 4	78.2828	78.2828	0.0461	fold change	-1.43
ETNK1	55500	ethanolamine kinase 1	1 out of 4	78.2828	78.2828	0.032	fold change	1.43
SCAI	286205	suppressor of cancer cell invasion	1 out of 4	78.2828	78.2828	0.0228	fold change	1.43
SAMD12	401474	sterile alpha motif domain containing 12	1 out of 4	78.2828	78.2828	0.0204	fold change	1.43
NAP1L3	4675	nucleosome assembly protein 1-like 3	1 out of 4	78.2828	78.2828	0.0381	fold change	1.43
PIGL	9487	phosphatidylinositol glycan anchor biosynthesis, class L	1 out of 4	78.2828	78.2828	0.0121	fold change	1.43
SCN3A	6328	sodium channel, voltage-gated, type III, alpha subunit	1 out of 4	78.2828	78.2828	0.0315	fold change	1.43
TLL2	7093	tolloid-like 2	1 out of 4	78.2828	78.2828	0.0153	fold change	1.43
SMIM8	57150	chromosome 6 open reading frame 162	1 out of 4	78.2828	78.2828	0.0089	fold change	1.43
ANKRD6	22881	ankyrin repeat domain 6	1 out of 4	78.2828	78.2828	0.0298	fold change	1.43
LOC100507557	100507557	uncharacterized LOC100507557	1 out of 4	78.2828	78.2828	0.0375	fold change	1.43
ZNF518B	85460	zinc finger protein 518B	1 out of 4	78.2326													78.2326	0.0454	fold change	1.48
IRX2	153572	iroquois homeobox 2	1 out of 4	77.8368													77.8368	0.018	fold change	-1.47
KCNH5	27133	potassium voltage-gated channel, subfamily H (eag-related), member 5	1 out of 4	77.8368													77.8368	0.044	fold change	1.47
TXLNGY	246126	taxilin gamma 2, pseudogene	1 out of 4	77.8368													77.8368	0.0352	fold change	1.47
SLC22A4	6583	solute carrier family 22 (organic cation/ergothioneine transporter), member 4	1 out of 4	77.8368													77.8368	0.0152	fold change	-1.47
FAM107B	83641	family with sequence similarity 107, member B	1 out of 4	77.7871									77.7871	0.0161	fold change	-1.69
HERC2P2	400322	hect domain and RLD 2 pseudogene 2	1 out of 4	77.7871									77.7871	0.0312	fold change	-1.69
ZNF536	9745	zinc finger protein 536	1 out of 4	77.7871									77.7871	0.0447	fold change	-1.69
PDGFD	80310	platelet derived growth factor D	1 out of 4	77.7871									77.7871	0.0255	fold change	1.69
ILF3	3609	interleukin enhancer binding factor 3, 90kDa	1 out of 4	77.541					77.541	0.0454	fold change	1.32
NIT2	56954	nitrilase family, member 2	1 out of 4	77.541					77.541	0.0361	fold change	1.32
CD109	135228	CD109 molecule	1 out of 4	77.541					77.541	0.0205	fold change	1.32
AL832802	NA		1 out of 4	77.541					77.541	0.0061	fold change	-1.32
ALYREF	10189	Aly/REF export factor	1 out of 4	77.541					77.541	0.0494	fold change	1.32
LOC100996578	100996578	uncharacterized LOC100996578	1 out of 4	77.541					77.541	0.0355	fold change	1.32
HAT1	8520	histone acetyltransferase 1	1 out of 4	77.541					77.541	0.0276	fold change	1.32
AI682088	NA		1 out of 4	77.541					77.541	0.0366	fold change	1.32
CAMK2D	817	calcium/calmodulin-dependent protein kinase II delta	1 out of 4	77.541					77.541	0.0292	fold change	1.32
TRDMT1	1787	tRNA aspartic acid methyltransferase 1	1 out of 4	77.541					77.541	0.006	fold change	1.32
KHDRBS1	10657	KH domain containing, RNA binding, signal transduction associated 1	1 out of 4	77.541					77.541	0.0469	fold change	1.32
SLC25A23	79085	solute carrier family 25 (mitochondrial carrier; phosphate carrier), member 23	1 out of 4	77.541					77.541	0.0031	fold change	-1.32
244605_at	NA		1 out of 4	77.541					77.541	0.0274	fold change	-1.32
W87688	NA		1 out of 4	77.541					77.541	0.0183	fold change	1.32
AF052140	NA		1 out of 4	77.541					77.541	0.0116	fold change	-1.32
ADAM33	80332	ADAM metallopeptidase domain 33	1 out of 4	77.541					77.541	0.0045	fold change	-1.32
TMEM245	23731	transmembrane protein 245	1 out of 4	77.541					77.541	0.0193	fold change	1.32
TMEM44-AS1	100507297	TMEM44 antisense RNA 1	1 out of 4	77.541					77.541	0.0292	fold change	1.32
AP1G2	8906	adaptor-related protein complex 1, gamma 2 subunit	1 out of 4	77.541					77.541	0.0426	fold change	-1.32
AL157458	NA		1 out of 4	77.541					77.541	0.0334	fold change	-1.32
ZNF441	126068	zinc finger protein 441	1 out of 4	77.541					77.541	0.008	fold change	1.32
HBEGF	1839	heparin-binding EGF-like growth factor	1 out of 4	77.541					77.541	0.02	fold change	1.32
AGPS	8540	alkylglycerone phosphate synthase	1 out of 4	77.541					77.541	0.0054	fold change	1.32
PPP4R3B	57223	SMEK homolog 2, suppressor of mek1 (Dictyostelium)	1 out of 4	77.541					77.541	0.0268	fold change	1.32
AK025089	NA		1 out of 4	77.541					77.541	0.0277	fold change	-1.32
ASPHD2	57168	aspartate beta-hydroxylase domain containing 2	1 out of 4	77.201	77.201	0.0025	fold change	1.42
SLF1	84250	ankyrin repeat domain 32	1 out of 4	77.201	77.201	0.0277	fold change	1.42
TRAK2	66008	trafficking protein, kinesin binding 2	1 out of 4	77.201	77.201	0.0093	fold change	-1.42
SVIP	258010	small VCP/p97-interacting protein	1 out of 4	77.201	77.201	0.046	fold change	1.42
PRKAA2	5563	protein kinase, AMP-activated, alpha 2 catalytic subunit	1 out of 4	77.201	77.201	0.0462	fold change	1.42
FBXO32	114907	F-box protein 32	1 out of 4	77.201	77.201	0.027	fold change	-1.42
DPH5	51611	DPH5 homolog (S. cerevisiae)	1 out of 4	77.201	77.201	0.0118	fold change	1.42
CASK	8573	calcium/calmodulin-dependent serine protein kinase (MAGUK family)	1 out of 4	77.201	77.201	0.0057	fold change	1.42
MCF2	4168	MCF.2 cell line derived transforming sequence	1 out of 4	77.201	77.201	0.0414	fold change	1.42
N35250	NA		1 out of 4	77.201	77.201	0.0111	fold change	1.42
PPP5D1	100506012	PPP5 tetratricopeptide repeat domain containing 1	1 out of 4	77.201	77.201	0.0358	fold change	1.42
BCLAF1	9774	BCL2-associated transcription factor 1	1 out of 4	77.201	77.201	0.0075	fold change	1.42
HTATIP2	10553	HIV-1 Tat interactive protein 2, 30kDa	1 out of 4	77.1034									77.1034	0.014	fold change	-1.68
SORBS2	8470	sorbin and SH3 domain containing 2	1 out of 4	77.1034									77.1034	0.0374	fold change	1.68
AW293296	NA		1 out of 4	77.1034									77.1034	0.0483	fold change	-1.68
TBC1D12	23232	TBC1 domain family, member 12	1 out of 4	77.1034									77.1034	0.0054	fold change	-1.68
PDLIM3	27295	PDZ and LIM domain 3	1 out of 4	77.0072													77.0072	0.031	fold change	-1.46
PANK1	53354	pantothenate kinase 1	1 out of 4	77.0072													77.0072	0.0237	fold change	1.46
JMJD1C	221037	jumonji domain containing 1C	1 out of 4	77.0072													77.0072	0.0359	fold change	1.46
ANTXR2	118429	anthrax toxin receptor 2	1 out of 4	77.0072													77.0072	0.0261	fold change	-1.46
FDPS	2224	farnesyl diphosphate synthase	1 out of 4	77.0072													77.0072	0.0315	fold change	-1.46
RTKN	6242	rhotekin	1 out of 4	76.7672									76.7672	0.0412	fold change	-1.67
EFNA5	1946	ephrin-A5	1 out of 4	76.7672									76.7672	0.017	fold change	1.67
LINC01105	150622	uncharacterized LOC150622	1 out of 4	76.7672									76.7672	0.0246	fold change	-1.67
GPCPD1	56261	glycerophosphocholine phosphodiesterase GDE1 homolog (S. cerevisiae)	1 out of 4	76.7672									76.7672	0.0113	fold change	1.67
ZNF781	163115	zinc finger protein 781	1 out of 4	76.3849													76.3849	0.0399	fold change	1.45
AU158358	NA		1 out of 4	76.1951									76.1951	0.0132	fold change	-1.66
ITPR3	3710	inositol 1,4,5-trisphosphate receptor, type 3	1 out of 4	76.1951									76.1951	0.0327	fold change	-1.66
BMS1P20	96610	BMS1 homolog, ribosome assembly protein (yeast) pseudogene	1 out of 4	76.1951									76.1951	0.0242	fold change	1.66
AW469495	NA		1 out of 4	76.1951									76.1951	0.04	fold change	1.66
NIPAL3	57185	NIPA-like domain containing 3	1 out of 4	76.1951									76.1951	0.0307	fold change	-1.66
ADGRB3	577	brain-specific angiogenesis inhibitor 3	1 out of 4	76.1487	76.1487	0.038	fold change	1.41
ARHGEF12	23365	Rho guanine nucleotide exchange factor (GEF) 12	1 out of 4	76.1487	76.1487	0.0076	fold change	1.41
AI760366	NA		1 out of 4	76.1487	76.1487	0.0196	fold change	1.41
CACNB3	784	calcium channel, voltage-dependent, beta 3 subunit	1 out of 4	76.1487	76.1487	0.0199	fold change	1.41
UBE2T	29089	ubiquitin-conjugating enzyme E2T (putative)	1 out of 4	76.1487	76.1487	0.036	fold change	1.41
MZT1	440145	mitotic spindle organizing protein 1	1 out of 4	76.1487	76.1487	0.0202	fold change	1.41
C5orf34	375444	chromosome 5 open reading frame 34	1 out of 4	76.1487	76.1487	0.0076	fold change	1.41
DSCC1	79075	defective in sister chromatid cohesion 1 homolog (S. cerevisiae)	1 out of 4	76.1487	76.1487	0.0414	fold change	-1.41
ANKRD45	339416	ankyrin repeat domain 45	1 out of 4	76.1487	76.1487	0.0335	fold change	1.41
C1QTNF4	114900	C1q and tumor necrosis factor related protein 4	1 out of 4	76.1487	76.1487	0.039	fold change	1.41
ARMCX5	64860	armadillo repeat containing, X-linked 5	1 out of 4	76.1487	76.1487	0.0422	fold change	1.41
KLF15	28999	Kruppel-like factor 15	1 out of 4	76.1487	76.1487	0.0215	fold change	-1.41
LOC100288911	100288911	uncharacterized LOC100288911	1 out of 4	76.1487	76.1487	0.0134	fold change	1.41
ARRB2	409	arrestin, beta 2	1 out of 4	75.8196													75.8196	0.0459	fold change	-1.44
KCTD14	65987	potassium channel tetramerisation domain containing 14	1 out of 4	75.8196													75.8196	0.001	fold change	1.44
AU147177	NA		1 out of 4	75.8196													75.8196	0.0443	fold change	-1.44
CREBL2	1389	cAMP responsive element binding protein-like 2	1 out of 4	75.8196													75.8196	0.0159	fold change	-1.44
ARHGEF6	9459	Rac/Cdc42 guanine nucleotide exchange factor (GEF) 6	1 out of 4	75.8196													75.8196	0.0335	fold change	-1.44
ABCA1	19	ATP-binding cassette, sub-family A (ABC1), member 1	1 out of 4	75.8196													75.8196	0.025	fold change	-1.44
AU157438	NA		1 out of 4	75.8196													75.8196	0.0162	fold change	-1.44
HGSNAT	138050	heparan-alpha-glucosaminide N-acetyltransferase	1 out of 4	75.6327					75.6327	0.0203	fold change	1.31
ANAPC10	10393	anaphase promoting complex subunit 10	1 out of 4	75.6327					75.6327	0.0119	fold change	1.31
GPI	2821	glucose-6-phosphate isomerase	1 out of 4	75.6327					75.6327	0.0115	fold change	-1.31
CDK10	8558	cyclin-dependent kinase 10	1 out of 4	75.6327					75.6327	0.0139	fold change	-1.31
242886_at	NA		1 out of 4	75.6327					75.6327	0.0089	fold change	-1.31
2022-09-06	23157	septin 6	1 out of 4	75.6327					75.6327	0.0086	fold change	1.31
DCTN4	51164	dynactin 4 (p62)	1 out of 4	75.6327					75.6327	0.0286	fold change	1.31
PTN	5764	pleiotrophin	1 out of 4	75.6327					75.6327	0.0225	fold change	1.31
NXT2	55916	nuclear transport factor 2-like export factor 2	1 out of 4	75.6327					75.6327	0.0343	fold change	1.31
ZNF140	7699	zinc finger protein 140	1 out of 4	75.6327					75.6327	0.028	fold change	-1.31
CAHM	100526820	colon adenocarcinoma hypermethylated (non-protein coding)	1 out of 4	75.6327					75.6327	0.0138	fold change	1.31
HIC2	23119	hypermethylated in cancer 2	1 out of 4	75.6327					75.6327	0.0188	fold change	-1.31
BM041211	NA		1 out of 4	75.6327					75.6327	0.0072	fold change	-1.31
ERMAP	114625	erythroblast membrane-associated protein (Scianna blood group)	1 out of 4	75.6327					75.6327	0.0323	fold change	1.31
AI821426	NA		1 out of 4	75.6327					75.6327	0.0472	fold change	-1.31
LAMA4	3910	laminin, alpha 4	1 out of 4	75.6327					75.6327	0.0068	fold change	1.31
LRRC10B	390205	leucine rich repeat containing 10B	1 out of 4	75.6327					75.6327	0.0452	fold change	-1.31
PCNA	5111	proliferating cell nuclear antigen	1 out of 4	75.6327					75.6327	0.0137	fold change	1.31
CUL4B	8450	cullin 4B	1 out of 4	75.6327					75.6327	0.0266	fold change	1.31
Hs.673813	NA		1 out of 4	75.6327					75.6327	0.0143	fold change	-1.31
ADK	132	adenosine kinase	1 out of 4	75.6327					75.6327	0.0154	fold change	1.31
EPPK1	83481	epiplakin 1	1 out of 4	75.6327					75.6327	0.0465	fold change	1.31
NUB1	51667	negative regulator of ubiquitin-like proteins 1	1 out of 4	75.4933									75.4933	0.0074	fold change	-1.65
PLEKHG3	26030	pleckstrin homology domain containing, family G (with RhoGef domain) member 3	1 out of 4	75.4933									75.4933	0.0002	fold change	-1.65
CLEC7A	64581	C-type lectin domain family 7, member A	1 out of 4	75.4933									75.4933	0.0156	fold change	-1.65
C12orf76	400073	chromosome 12 open reading frame 76	1 out of 4	75.4933									75.4933	0.0233	fold change	-1.65
DNAJB6	10049	DnaJ (Hsp40) homolog, subfamily B, member 6	1 out of 4	75.4933									75.4933	0.0132	fold change	-1.65
SIAE	54414	sialic acid acetylesterase	1 out of 4	75.4933									75.4933	0.0144	fold change	1.65
BRMS1L	84312	breast cancer metastasis-suppressor 1-like	1 out of 4	75.171	75.171	0.0332	fold change	1.4
CDS1	1040	CDP-diacylglycerol synthase (phosphatidate cytidylyltransferase) 1	1 out of 4	75.171	75.171	0.0357	fold change	1.4
TMEM70	54968	transmembrane protein 70	1 out of 4	75.171	75.171	0.0409	fold change	1.4
ARL6	84100	ADP-ribosylation factor-like 6	1 out of 4	75.171	75.171	0.0448	fold change	1.4
RBM15	64783	RNA binding motif protein 15	1 out of 4	75.171	75.171	0.0022	fold change	1.4
AI821935	NA		1 out of 4	75.171	75.171	0.0344	fold change	-1.4
ZFYVE16	9765	zinc finger, FYVE domain containing 16	1 out of 4	75.171	75.171	0.0234	fold change	1.4
AU147152	NA		1 out of 4	75.171	75.171	0.0211	fold change	-1.4
ZC3H12B	340554	zinc finger CCCH-type containing 12B	1 out of 4	75.171	75.171	0.007	fold change	1.4
DCAF12L2	340578	DDB1 and CUL4 associated factor 12-like 2	1 out of 4	75.171	75.171	0.019	fold change	1.4
SLC41A2	84102	solute carrier family 41, member 2	1 out of 4	75.171	75.171	0.005	fold change	1.4
CAPS2	84698	calcyphosine 2	1 out of 4	75.171	75.171	0.0036	fold change	1.4
B9D1	27077	B9 protein domain 1	1 out of 4	75.171	75.171	0.037	fold change	1.4
NDN	4692	necdin homolog (mouse)	1 out of 4	75.171	75.171	0.031	fold change	1.4
LAMA1	284217	laminin, alpha 1	1 out of 4	75.171	75.171	0.0495	fold change	1.4
NUDCD1	84955	NudC domain containing 1	1 out of 4	75.171	75.171	0.0474	fold change	1.4
LOC283588	283588	uncharacterized LOC283588	1 out of 4	75.171	75.171	0.0206	fold change	1.4
TTC33	23548	tetratricopeptide repeat domain 33	1 out of 4	75.171	75.171	0.0043	fold change	1.4
UBE2N	7334	ubiquitin-conjugating enzyme E2N	1 out of 4	75.171	75.171	0.0499	fold change	1.4
CNTN3	5067	contactin 3 (plasmacytoma associated)	1 out of 4	75.171	75.171	0.029	fold change	1.4
CUTALP	253039	uncharacterized LOC253039	1 out of 4	75.0334													75.0334	0.0329	fold change	-1.43
ANK1	286	ankyrin 1, erythrocytic	1 out of 4	75.0334													75.0334	0.0081	fold change	1.43
AW590101	NA		1 out of 4	74.9412									74.9412	0.0479	fold change	1.64
LOC101928068	101928068		1 out of 4	74.9412									74.9412	0.0232	fold change	1.64
LHPP	64077	phospholysine phosphohistidine inorganic pyrophosphate phosphatase	1 out of 4	74.9412									74.9412	0.0236	fold change	-1.64
ALAS2	212	aminolevulinate, delta-, synthase 2	1 out of 4	74.9412									74.9412	0.0138	fold change	-1.64
CPD	1362	carboxypeptidase D	1 out of 4	74.3075													74.3075	0.0418	fold change	-1.42
PKD2	5311	polycystic kidney disease 2 (autosomal dominant)	1 out of 4	74.3075													74.3075	0.0407	fold change	-1.42
ELL2	22936	elongation factor, RNA polymerase II, 2	1 out of 4	74.3075													74.3075	0.0315	fold change	-1.42
TRPS1	7227	trichorhinophalangeal syndrome I	1 out of 4	74.3075													74.3075	0.0056	fold change	-1.42
AW880875	NA		1 out of 4	74.3075													74.3075	0.0323	fold change	1.42
STOML1	9399	stomatin (EPB72)-like 1	1 out of 4	74.217									74.217	0.0308	fold change	1.63
PDE7A	5150	phosphodiesterase 7A	1 out of 4	74.217									74.217	0.0017	fold change	-1.63
SPART	23111	spastic paraplegia 20 (Troyer syndrome)	1 out of 4	74.217									74.217	0.0156	fold change	-1.63
AA016210	NA		1 out of 4	74.217									74.217	0.0238	fold change	1.63
AF289567	NA		1 out of 4	74.217									74.217	0.0043	fold change	-1.63
SLC7A14	57709	solute carrier family 7 (orphan transporter), member 14	1 out of 4	74.217									74.217	0.0078	fold change	1.63
SGK494	124923	uncharacterized serine/threonine-protein kinase SgK494	1 out of 4	73.9941					73.9941	0.0281	fold change	-1.3
CCDC144B	284047	coiled-coil domain containing 144B (pseudogene)	1 out of 4	73.9941					73.9941	0.0412	fold change	-1.3
NUDCD2	134492	NudC domain containing 2	1 out of 4	73.9941					73.9941	0.0406	fold change	1.3
AW302848	NA		1 out of 4	73.9941					73.9941	0.0261	fold change	-1.3
FTX	100302692	FTX transcript, XIST regulator (non-protein coding)	1 out of 4	73.9941					73.9941	0.0154	fold change	-1.3
KBTBD3	143879	kelch repeat and BTB (POZ) domain containing 3	1 out of 4	73.9941					73.9941	0.022	fold change	1.3
STAM2	10254	signal transducing adaptor molecule (SH3 domain and ITAM motif) 2	1 out of 4	73.9941					73.9941	0.0009	fold change	1.3
RBBP4	5928	retinoblastoma binding protein 4	1 out of 4	73.9941					73.9941	0.0139	fold change	1.3
CCDC152	100129792	coiled-coil domain containing 152	1 out of 4	73.9941					73.9941	0.0383	fold change	1.3
AA968447	NA		1 out of 4	73.9941					73.9941	0.0155	fold change	-1.3
AK024580	NA		1 out of 4	73.9941					73.9941	0.0205	fold change	-1.3
AL359594	NA		1 out of 4	73.9941					73.9941	0.0324	fold change	-1.3
UTP23	84294	UTP23, small subunit (SSU) processome component, homolog (yeast)	1 out of 4	73.9941					73.9941	0.0169	fold change	1.3
AL134451	NA		1 out of 4	73.9941					73.9941	0.0252	fold change	-1.3
LRRCC1	85444	leucine rich repeat and coiled-coil centrosomal protein 1	1 out of 4	73.9941					73.9941	0.0176	fold change	1.3
AA447714	NA		1 out of 4	73.9941					73.9941	0.0267	fold change	-1.3
2022-03-07	64844	membrane-associated ring finger (C3HC4) 7, E3 ubiquitin protein ligase	1 out of 4	73.9941					73.9941	0.0106	fold change	1.3
PLEKHF2	79666	pleckstrin homology domain containing, family F (with FYVE domain) member 2	1 out of 4	73.9941					73.9941	0.0103	fold change	1.3
RPAP3	79657	RNA polymerase II associated protein 3	1 out of 4	73.9941					73.9941	0.042	fold change	1.3
LINC01700	101928435		1 out of 4	73.9941					73.9941	0.0043	fold change	-1.3
AI458208	NA		1 out of 4	73.9941					73.9941	0.0182	fold change	1.3
C1GALT1C1	29071	C1GALT1-specific chaperone 1	1 out of 4	73.9941					73.9941	0.0435	fold change	1.3
SLC22A3	6581	solute carrier family 22 (extraneuronal monoamine transporter), member 3	1 out of 4	73.9941					73.9941	0.0208	fold change	-1.3
LOC100289473	100289473	cytoskeleton associated protein 2-like pseudogene	1 out of 4	73.9941					73.9941	0.0286	fold change	-1.3
239649_at	NA		1 out of 4	73.9941					73.9941	0.0325	fold change	-1.3
MFSD8	256471	major facilitator superfamily domain containing 8	1 out of 4	73.9941					73.9941	0.0103	fold change	1.3
GINM1	116254	glycoprotein integral membrane 1	1 out of 4	73.9941					73.9941	0.0041	fold change	1.3
NM_017932	NA		1 out of 4	73.9941					73.9941	0.0476	fold change	-1.3
NM_025012	NA		1 out of 4	73.9941					73.9941	0.0274	fold change	-1.3
VEGFC	7424	vascular endothelial growth factor C	1 out of 4	73.9941					73.9941	0.0389	fold change	1.3
TOR1AIP1	26092	torsin A interacting protein 1	1 out of 4	73.9941					73.9941	0.0152	fold change	1.3
RUNDC1	146923	RUN domain containing 1	1 out of 4	73.7278	73.7278	0.0052	fold change	1.39
BTG1	694	B-cell translocation gene 1, anti-proliferative	1 out of 4	73.7278	73.7278	0.0334	fold change	1.39
ELAVL1	1994	ELAV (embryonic lethal, abnormal vision, Drosophila)-like 1 (Hu antigen R)	1 out of 4	73.7278	73.7278	0.0013	fold change	1.39
PLAT	5327	plasminogen activator, tissue	1 out of 4	73.7278	73.7278	0.0382	fold change	-1.39
BEX1	55859	brain expressed, X-linked 1	1 out of 4	73.7278	73.7278	0.0445	fold change	1.39
XPR1	9213	xenotropic and polytropic retrovirus receptor 1	1 out of 4	73.7278	73.7278	0.0342	fold change	1.39
MAGEE1	57692	melanoma antigen family E, 1	1 out of 4	73.7278	73.7278	0.048	fold change	1.39
DIAPH2	1730	diaphanous homolog 2 (Drosophila)	1 out of 4	73.7278	73.7278	0.0375	fold change	1.39
AA442776	NA		1 out of 4	73.7278	73.7278	0.0082	fold change	1.39
TWIST2	117581	twist homolog 2 (Drosophila)	1 out of 4	73.7278													73.7278	0.0348	fold change	1.41
DOC2A	8448	double C2-like domains, alpha	1 out of 4	73.7278	73.7278	0.0303	fold change	1.39
RPS6KA6	27330	ribosomal protein S6 kinase, 90kDa, polypeptide 6	1 out of 4	73.7278	73.7278	0.0221	fold change	1.39
TMEM74B	55321	transmembrane protein 74B	1 out of 4	73.7278													73.7278	0.0386	fold change	1.41
BE463995	NA		1 out of 4	73.7278	73.7278	0.0106	fold change	1.39
ACSM5	54988	acyl-CoA synthetase medium-chain family member 5	1 out of 4	73.7278													73.7278	0.0358	fold change	-1.41
MRPL39	54148	mitochondrial ribosomal protein L39	1 out of 4	73.7278	73.7278	0.0316	fold change	1.39
DAAM2	23500	dishevelled associated activator of morphogenesis 2	1 out of 4	73.7278	73.7278	0.0304	fold change	-1.39
PPP1R1A	5502	protein phosphatase 1, regulatory (inhibitor) subunit 1A	1 out of 4	73.7278	73.7278	0.0363	fold change	1.39
PABPC1L2B	645974	poly(A) binding protein, cytoplasmic 1-like 2B	1 out of 4	73.7278	73.7278	0.0318	fold change	1.39
ACYP1	97	acylphosphatase 1, erythrocyte (common) type	1 out of 4	73.7278	73.7278	0.0314	fold change	1.39
RSRP1	57035	chromosome 1 open reading frame 63	1 out of 4	73.7278													73.7278	0.04	fold change	-1.41
LINC00643	646113	long intergenic non-protein coding RNA 643	1 out of 4	73.7278	73.7278	0.0408	fold change	1.39
ADGRB2	576	brain-specific angiogenesis inhibitor 2	1 out of 4	73.6833									73.6833	0.0015	fold change	1.62
A2M	2	alpha-2-macroglobulin	1 out of 4	73.6833									73.6833	0.0061	fold change	-1.62
LOC102724689	102724689		1 out of 4	73.6833									73.6833	0.0215	fold change	1.62
NKAIN2	154215	Na+/K+ transporting ATPase interacting 2	1 out of 4	73.6833									73.6833	0.0207	fold change	-1.62
FGFR2	2263	fibroblast growth factor receptor 2	1 out of 4	73.6833									73.6833	0.0392	fold change	-1.62
UG0898H09	643763	uncharacterized LOC643763	1 out of 4	73.6833									73.6833	0.0149	fold change	1.62
BI598831	NA		1 out of 4	73.1133									73.1133	0.0151	fold change	1.61
ARHGDIB	397	Rho GDP dissociation inhibitor (GDI) beta	1 out of 4	73.1133									73.1133	0.0165	fold change	-1.61
DLX6	1750	distal-less homeobox 6	1 out of 4	73.1133									73.1133	0.0328	fold change	1.61
GRIN2A	2903	glutamate receptor, ionotropic, N-methyl D-aspartate 2A	1 out of 4	73.1133									73.1133	0.0494	fold change	1.61
CCP110	9738	centriolar coiled coil protein 110kDa	1 out of 4	73.1133									73.1133	0.0079	fold change	-1.61
CPED1	79974	cadherin-like and PC-esterase domain containing 1	1 out of 4	73.1133									73.1133	0.0497	fold change	-1.61
SRSF2	6427	serine/arginine-rich splicing factor 2	1 out of 4	72.9831													72.9831	0.0328	fold change	-1.4
AI792315	NA		1 out of 4	72.9831													72.9831	0.0198	fold change	-1.4
FADS1	3992	fatty acid desaturase 1	1 out of 4	72.9831													72.9831	0.023	fold change	-1.4
RASSF10	644943	Ras association (RalGDS/AF-6) domain family (N-terminal) member 10	1 out of 4	72.9831													72.9831	0.0118	fold change	1.4
KCNJ12	3768	potassium inwardly-rectifying channel, subfamily J, member 12	1 out of 4	72.9831													72.9831	0.0423	fold change	1.4
PGAM2	5224	phosphoglycerate mutase 2 (muscle)	1 out of 4	72.9831													72.9831	0.0364	fold change	-1.4
CUX2	23316	cut-like homeobox 2	1 out of 4	72.9831													72.9831	0.0458	fold change	1.4
BU689085	NA		1 out of 4	72.9831													72.9831	0.0494	fold change	-1.4
WASF2	10163	WAS protein family, member 2	1 out of 4	72.9831													72.9831	0.0418	fold change	-1.4
COPS2	9318	COP9 constitutive photomorphogenic homolog subunit 2 (Arabidopsis)	1 out of 4	72.4669	72.4669	0.0083	fold change	1.38
PLAA	9373	phospholipase A2-activating protein	1 out of 4	72.4669									72.4669	0.0009	fold change	1.6
AJ012500	NA		1 out of 4	72.4669	72.4669	0.0139	fold change	-1.38
AK025359	NA		1 out of 4	72.4669	72.4669	0.0107	fold change	-1.38
LINC00836	101929052		1 out of 4	72.4669	72.4669	0.008	fold change	-1.38
SLC4A4	8671	solute carrier family 4, sodium bicarbonate cotransporter, member 4	1 out of 4	72.4669									72.4669	0.006	fold change	1.6
ZCCHC18	644353	zinc finger, CCHC domain containing 18	1 out of 4	72.4669	72.4669	0.0127	fold change	1.38
RASGRP3	25780	RAS guanyl releasing protein 3 (calcium and DAG-regulated)	1 out of 4	72.4669									72.4669	0.0367	fold change	-1.6
FAM126B	285172	family with sequence similarity 126, member B	1 out of 4	72.4669	72.4669	0.0117	fold change	1.38
AA922154	NA		1 out of 4	72.4669	72.4669	0.002	fold change	-1.38
MIA3	375056	melanoma inhibitory activity family, member 3	1 out of 4	72.4669	72.4669	0.0323	fold change	1.38
BAG4	9530	BCL2-associated athanogene 4	1 out of 4	72.4669	72.4669	0.023	fold change	1.38
AMER2	219287	family with sequence similarity 123A	1 out of 4	72.4669									72.4669	0.0052	fold change	-1.6
STEAP2	261729	STEAP family member 2, metalloreductase	1 out of 4	72.4669	72.4669	0.045	fold change	1.38
ARMC8	25852	armadillo repeat containing 8	1 out of 4	72.4669	72.4669	0.0225	fold change	1.38
AI915827	NA		1 out of 4	72.4669	72.4669	0.0236	fold change	1.38
RIIAD1	284485	regulatory subunit of type II PKA R-subunit (RIIa) domain containing 1	1 out of 4	72.4669									72.4669	0.0371	fold change	1.6
KATNB1	10300	katanin p80 (WD repeat containing) subunit B 1	1 out of 4	72.4669	72.4669	0.049	fold change	1.38
PGAP1	80055	post-GPI attachment to proteins 1	1 out of 4	72.4669	72.4669	0.0406	fold change	1.38
SUN2	25777	Sad1 and UNC84 domain containing 2	1 out of 4	72.4669									72.4669	0.042	fold change	-1.6
LOC100507477	100507477	uncharacterized LOC100507477	1 out of 4	72.4669	72.4669	0.0191	fold change	-1.38
PPARD	5467	peroxisome proliferator-activated receptor delta	1 out of 4	72.1272					72.1272	0.0201	fold change	-1.29
TPCN2	219931	two pore segment channel 2	1 out of 4	72.1272					72.1272	0.0111	fold change	1.29
FUT8-AS1	645431	FUT8 antisense RNA 1	1 out of 4	72.1272					72.1272	0.0392	fold change	1.29
BU147359	NA		1 out of 4	72.1272					72.1272	0.0188	fold change	-1.29
AU159344	NA		1 out of 4	72.1272					72.1272	0.0022	fold change	-1.29
AU145280	NA		1 out of 4	72.1272					72.1272	0.0229	fold change	-1.29
AL046412	NA		1 out of 4	72.1272					72.1272	0.0254	fold change	-1.29
ZFHX2	85446	zinc finger homeobox 2	1 out of 4	72.1272					72.1272	0.0235	fold change	-1.29
PIP4K2B	8396	phosphatidylinositol-5-phosphate 4-kinase, type II, beta	1 out of 4	72.1272					72.1272	0.0398	fold change	1.29
GALNT2	2590	UDP-N-acetyl-alpha-D-galactosamine:polypeptide N-acetylgalactosaminyltransferase 2 (GalNAc-T2)	1 out of 4	72.1272					72.1272	0.03	fold change	1.29
WNK1	65125	WNK lysine deficient protein kinase 1	1 out of 4	72.1272					72.1272	0.0217	fold change	-1.29
BC037883	NA		1 out of 4	72.1272					72.1272	0.0275	fold change	-1.29
ARMC10	83787	armadillo repeat containing 10	1 out of 4	72.1272					72.1272	0.0282	fold change	1.29
Hs.673464	NA		1 out of 4	72.1272					72.1272	0.0009	fold change	-1.29
U2SURP	23350	U2 snRNP-associated SURP domain containing	1 out of 4	72.1272					72.1272	0.0194	fold change	1.29
COL18A1	80781	collagen, type XVIII, alpha 1	1 out of 4	72.1272					72.1272	0.036	fold change	-1.29
NPTN-IT1	101241892		1 out of 4	72.1272					72.1272	0.0361	fold change	-1.29
HSPA12A	259217	heat shock 70kDa protein 12A	1 out of 4	72.1272					72.1272	0.0027	fold change	-1.29
ELAC1	55520	elaC homolog 1 (E. coli)	1 out of 4	72.1272					72.1272	0.0028	fold change	1.29
BE348291	NA		1 out of 4	72.1272					72.1272	0.0269	fold change	1.29
SP3	6670	Sp3 transcription factor	1 out of 4	72.1272					72.1272	0.0016	fold change	1.29
FCF1	51077	FCF1 small subunit (SSU) processome component homolog (S. cerevisiae)	1 out of 4	72.1272					72.1272	0.0489	fold change	1.29
KLHDC1	122773	kelch domain containing 1	1 out of 4	72.1272					72.1272	0.0454	fold change	1.29
MBTPS2	51360	membrane-bound transcription factor peptidase, site 2	1 out of 4	72.1272					72.1272	0.0123	fold change	1.29
POLE3	54107	polymerase (DNA directed), epsilon 3, accessory subunit	1 out of 4	72.1272					72.1272	0.0081	fold change	1.29
JADE2	23338	PHD finger protein 15	1 out of 4	72.1272					72.1272	0.0334	fold change	-1.29
AK024712	NA		1 out of 4	72.1272					72.1272	0.0479	fold change	-1.29
YWHAE	7531	tyrosine 3-monooxygenase/tryptophan 5-monooxygenase activation protein, epsilon polypeptide	1 out of 4	72.1272					72.1272	0.034	fold change	1.29
PRELID3B	51012	slowmo homolog 2 (Drosophila)	1 out of 4	72.1272					72.1272	0.0195	fold change	1.29
GIN1	54826	gypsy retrotransposon integrase 1	1 out of 4	72.1272					72.1272	0.0172	fold change	1.29
GHRLOS	100126793	ghrelin opposite strand/antisense RNA	1 out of 4	72.1272					72.1272	0.0359	fold change	-1.29
DCAF16	54876	DDB1 and CUL4 associated factor 16	1 out of 4	72.1272					72.1272	0.0404	fold change	1.29
OXA1L	5018	oxidase (cytochrome c) assembly 1-like	1 out of 4	71.958													71.958	0.046	fold change	-1.39
HEATR3	55027	HEAT repeat containing 3	1 out of 4	71.958													71.958	0.0247	fold change	-1.39
CRISPLD1	83690	cysteine-rich secretory protein LCCL domain containing 1	1 out of 4	71.958													71.958	0.0446	fold change	-1.39
ARFGAP3	26286	ADP-ribosylation factor GTPase activating protein 3	1 out of 4	71.958													71.958	0.0279	fold change	-1.39
WDR97	340390	KIAA1875	1 out of 4	71.958													71.958	0.0311	fold change	1.39
TMED5	50999	transmembrane emp24 protein transport domain containing 5	1 out of 4	71.7484									71.7484	0.0065	fold change	-1.59
LINC00899	100271722	uncharacterized LOC100271722	1 out of 4	71.7484									71.7484	0.0184	fold change	-1.59
GFPT1	2673	glutamine--fructose-6-phosphate transaminase 1	1 out of 4	71.7484									71.7484	0.0358	fold change	1.59
POGK	57645	pogo transposable element with KRAB domain	1 out of 4	71.7484									71.7484	0.0101	fold change	-1.59
COL8A2	1296	collagen, type VIII, alpha 2	1 out of 4	71.7484									71.7484	0.0006	fold change	-1.59
PLA2G16	11145	phospholipase A2, group XVI	1 out of 4	71.7484									71.7484	0.0369	fold change	-1.59
RGCC	28984	regulator of cell cycle	1 out of 4	71.7484									71.7484	0.0118	fold change	-1.59
AL110130	NA		1 out of 4	71.7484									71.7484	0.0029	fold change	-1.59
PPP2CA	5515	protein phosphatase 2, catalytic subunit, alpha isozyme	1 out of 4	71.4143	71.4143	0.0423	fold change	1.37
AI741365	NA		1 out of 4	71.4143	71.4143	0.0335	fold change	1.37
MAGI3	260425	membrane associated guanylate kinase, WW and PDZ domain containing 3	1 out of 4	71.4143	71.4143	0.0317	fold change	1.37
MAPK1	5594	mitogen-activated protein kinase 1	1 out of 4	71.4143	71.4143	0.0378	fold change	1.37
CCDC113	29070	coiled-coil domain containing 113	1 out of 4	71.4143	71.4143	0.0279	fold change	1.37
KIAA0232	9778	KIAA0232	1 out of 4	71.4143	71.4143	0.0298	fold change	1.37
PIAS1	8554	protein inhibitor of activated STAT, 1	1 out of 4	71.4143	71.4143	0.0081	fold change	1.37
MIB1	57534	mindbomb E3 ubiquitin protein ligase 1	1 out of 4	71.4143	71.4143	0.0066	fold change	1.37
LOC105373418	105373418		1 out of 4	71.4143	71.4143	0.0031	fold change	-1.37
GSPT2	23708	G1 to S phase transition 2	1 out of 4	71.4143	71.4143	0.0391	fold change	1.37
GSTM4	2948	glutathione S-transferase mu 4	1 out of 4	71.4143	71.4143	0.0336	fold change	1.37
TIPRL	261726	TIP41, TOR signaling pathway regulator-like (S. cerevisiae)	1 out of 4	71.4143	71.4143	0.0246	fold change	1.37
ZCCHC24	219654	zinc finger, CCHC domain containing 24	1 out of 4	71.4143	71.4143	0.0249	fold change	-1.37
TUFT1	7286	tuftelin 1	1 out of 4	71.4143	71.4143	0.0161	fold change	1.37
SNCA	6622	synuclein, alpha (non A4 component of amyloid precursor)	1 out of 4	71.4143	71.4143	0.0329	fold change	1.37
ZADH2	284273	zinc binding alcohol dehydrogenase domain containing 2	1 out of 4	71.4143	71.4143	0.018	fold change	1.37
ARPP19	10776	cAMP-regulated phosphoprotein, 19kDa	1 out of 4	71.4143	71.4143	0.0417	fold change	1.37
RPL39L	116832	ribosomal protein L39-like	1 out of 4	71.4143	71.4143	0.0177	fold change	1.37
GDAP1L1	78997	ganglioside induced differentiation associated protein 1-like 1	1 out of 4	71.4143	71.4143	0.0321	fold change	1.37
PCDHB5	26167	protocadherin beta 5	1 out of 4	71.4143	71.4143	0.0127	fold change	1.37
STC1	6781	stanniocalcin 1	1 out of 4	71.4143	71.4143	0.0192	fold change	-1.37
PARP2	10038	poly (ADP-ribose) polymerase 2	1 out of 4	71.4143	71.4143	0.0181	fold change	1.37
LIX1	167410	Lix1 homolog (chicken)	1 out of 4	71.1663													71.1663	0.0382	fold change	-1.38
BARD1	580	BRCA1 associated RING domain 1	1 out of 4	71.1663													71.1663	0.0026	fold change	-1.38
SNX18	112574	sorting nexin 18	1 out of 4	71.1663													71.1663	0.0295	fold change	-1.38
TAB2	23118	TGF-beta activated kinase 1/MAP3K7 binding protein 2	1 out of 4	71.1663													71.1663	0.0455	fold change	-1.38
PLOD3	8985	procollagen-lysine, 2-oxoglutarate 5-dioxygenase 3	1 out of 4	70.92									70.92	0.0047	fold change	-1.58
GUCY1A2	2977	guanylate cyclase 1, soluble, alpha 2	1 out of 4	70.92									70.92	0.0173	fold change	1.58
AAGAB	79719	alpha- and gamma-adaptin binding protein	1 out of 4	70.92									70.92	0.0235	fold change	1.58
POLR2F	5435	polymerase (RNA) II (DNA directed) polypeptide F	1 out of 4	70.92									70.92	0.0126	fold change	-1.58
BF940010	NA		1 out of 4	70.92									70.92	0.0224	fold change	-1.58
NKX2-2	4821	NK2 homeobox 2	1 out of 4	70.92									70.92	0.0268	fold change	-1.58
RAB12	201475	RAB12, member RAS oncogene family	1 out of 4	70.92									70.92	0.0456	fold change	1.58
MGAT4C	25834	mannosyl (alpha-1,3-)-glycoprotein beta-1,4-N-acetylglucosaminyltransferase, isozyme C (putative)	1 out of 4	70.92									70.92	0.0024	fold change	1.58
ACAD11	84129	acyl-CoA dehydrogenase family, member 11	1 out of 4	70.92									70.92	0.0002	fold change	-1.58
F3	2152	coagulation factor III (thromboplastin, tissue factor)	1 out of 4	70.92									70.92	0.0202	fold change	1.58
RFX4	5992	regulatory factor X, 4 (influences HLA class II expression)	1 out of 4	70.5129													70.5129	0.0183	fold change	-1.37
AK026802	NA		1 out of 4	70.5129													70.5129	0.0433	fold change	-1.37
AL832994	NA		1 out of 4	70.5129													70.5129	0.0048	fold change	1.37
STPG1	90529	sperm-tail PG-rich repeat containing 1	1 out of 4	70.5129													70.5129	0.032	fold change	1.37
ITPR2	3709	inositol 1,4,5-trisphosphate receptor, type 2	1 out of 4	70.5129													70.5129	0.0439	fold change	-1.37
RAB7A	7879	RAB7A, member RAS oncogene family	1 out of 4	70.5129													70.5129	0.0218	fold change	-1.37
AF113013	NA		1 out of 4	70.5129													70.5129	0.0191	fold change	-1.37
SLAIN1	122060	SLAIN motif family, member 1	1 out of 4	70.2711									70.2711	0.0303	fold change	-1.57
PLIN3	10226	perilipin 3	1 out of 4	70.2711									70.2711	0.0018	fold change	-1.57
CYP2J2	1573	cytochrome P450, family 2, subfamily J, polypeptide 2	1 out of 4	70.2711									70.2711	0.001	fold change	-1.57
AK094546	NA		1 out of 4	70.2711									70.2711	0.0268	fold change	-1.57
TGFBR2	7048	transforming growth factor, beta receptor II (70/80kDa)	1 out of 4	70.2711									70.2711	0.0338	fold change	-1.57
SEMA6A	57556	sema domain, transmembrane domain (TM), and cytoplasmic domain, (semaphorin) 6A	1 out of 4	70.2711									70.2711	0.0253	fold change	-1.57
TLNRD1	59274	mesoderm development candidate 1	1 out of 4	70.2711									70.2711	0.0467	fold change	1.57
ARHGAP23	57636	Rho GTPase activating protein 23	1 out of 4	70.2711									70.2711	0.0143	fold change	-1.57
DMGDH	29958	dimethylglycine dehydrogenase	1 out of 4	70.2711									70.2711	0.0379	fold change	1.57
COMMD2	51122	COMM domain containing 2	1 out of 4	70.1115					70.1115	0.0058	fold change	1.28
ZNF644	84146	zinc finger protein 644	1 out of 4	70.1115					70.1115	0.0375	fold change	1.28
HSPB11	51668	heat shock protein family B (small), member 11	1 out of 4	70.1115					70.1115	0.0154	fold change	1.28
AK022067	NA		1 out of 4	70.1115					70.1115	0.0223	fold change	-1.28
WASHC4	23325	KIAA1033	1 out of 4	70.1115					70.1115	0.0175	fold change	1.28
SEPSECS-AS1	285540	uncharacterized LOC285540	1 out of 4	70.1115					70.1115	0.0432	fold change	-1.28
TMEM258	746	chromosome 11 open reading frame 10	1 out of 4	70.1115					70.1115	0.0208	fold change	1.28
ZDHHC2	51201	zinc finger, DHHC-type containing 2	1 out of 4	70.1115					70.1115	0.0173	fold change	1.28
ERLIN2	11160	ER lipid raft associated 2	1 out of 4	70.1115					70.1115	0.022	fold change	1.28
B3GNT2	10678	UDP-GlcNAc:betaGal beta-1,3-N-acetylglucosaminyltransferase 2	1 out of 4	70.1115					70.1115	0.0279	fold change	1.28
DTWD1	56986	DTW domain containing 1	1 out of 4	70.1115					70.1115	0.0182	fold change	-1.28
207953_at	NA		1 out of 4	70.1115					70.1115	0.0209	fold change	-1.28
AU154905	NA		1 out of 4	70.1115					70.1115	0.0399	fold change	-1.28
UEVLD	55293	UEV and lactate/malate dehyrogenase domains	1 out of 4	70.1115					70.1115	0.0237	fold change	1.28
HOTAIRM1	100506311	HOXA transcript antisense RNA, myeloid-specific 1	1 out of 4	70.1115					70.1115	0.034	fold change	1.28
MIF4GD	57409	MIF4G domain containing	1 out of 4	70.1115					70.1115	0.0257	fold change	1.28
PLGRKT	55848	plasminogen receptor, C-terminal lysine transmembrane protein	1 out of 4	70.1115					70.1115	0.0229	fold change	1.28
DEGS1	8560	delta(4)-desaturase, sphingolipid 1	1 out of 4	70.1115					70.1115	0.0394	fold change	1.28
PYM1	84305	within bgcn homolog (Drosophila)	1 out of 4	70.1115					70.1115	0.0029	fold change	1.28
SCP2	6342	sterol carrier protein 2	1 out of 4	70.1115					70.1115	0.0052	fold change	1.28
PCNP	57092	PEST proteolytic signal containing nuclear protein	1 out of 4	70.1115					70.1115	0.0272	fold change	1.28
MAMDC2	256691	MAM domain containing 2	1 out of 4	70.1115					70.1115	0.0129	fold change	1.28
AU145394	NA		1 out of 4	70.1115					70.1115	0.0159	fold change	-1.28
ADIRF	10974	chromosome 10 open reading frame 116	1 out of 4	70.1115					70.1115	0.0384	fold change	1.28
CTTNBP2NL	55917	CTTNBP2 N-terminal like	1 out of 4	70.1115					70.1115	0.0272	fold change	1.28
ZNF26	7574	zinc finger protein 26	1 out of 4	70.1115					70.1115	0.0151	fold change	1.28
LYPLAL1	127018	lysophospholipase-like 1	1 out of 4	70.1115					70.1115	0.0035	fold change	1.28
AK025323	NA		1 out of 4	70.1115					70.1115	0.0089	fold change	-1.28
AU144570	NA		1 out of 4	70.1115					70.1115	0.0072	fold change	1.28
NEDD1	121441	neural precursor cell expressed, developmentally down-regulated 1	1 out of 4	70.1115					70.1115	0.0028	fold change	1.28
LINC00662	148189	long intergenic non-protein coding RNA 662	1 out of 4	70.1115					70.1115	0.0147	fold change	1.28
C11orf71	54494	chromosome 11 open reading frame 71	1 out of 4	70.1115					70.1115	0.0067	fold change	1.28
OGFOD3	79701	chromosome 17 open reading frame 101	1 out of 4	70.1115					70.1115	0.0376	fold change	1.28
RAC1	5879	ras-related C3 botulinum toxin substrate 1 (rho family, small GTP binding protein Rac1)	1 out of 4	70.1115					70.1115	0.0305	fold change	1.28
NAPEPLD	222236	N-acyl phosphatidylethanolamine phospholipase D	1 out of 4	70.1115					70.1115	0.0286	fold change	1.28
Hs.332731.0.S1_3p_at	NA		1 out of 4	70.1115					70.1115	0.0187	fold change	-1.28
GSTCD	79807	glutathione S-transferase, C-terminal domain containing	1 out of 4	70.1115					70.1115	0.0005	fold change	1.28
ZNHIT3	9326	zinc finger, HIT-type containing 3	1 out of 4	70.1115					70.1115	0.0411	fold change	1.28
DLGAP4	22839	discs, large (Drosophila) homolog-associated protein 4	1 out of 4	70.1115					70.1115	0.0193	fold change	-1.28
SLC24A1	9187	solute carrier family 24 (sodium/potassium/calcium exchanger), member 1	1 out of 4	70.1115					70.1115	0.035	fold change	1.28
AK025126	NA		1 out of 4	70.1115					70.1115	0.0202	fold change	-1.28
NOVA1	4857	neuro-oncological ventral antigen 1	1 out of 4	70.1115					70.1115	0.0249	fold change	1.28
TRNT1	51095	tRNA nucleotidyl transferase, CCA-adding, 1	1 out of 4	70.1115					70.1115	0.0232	fold change	1.28
SLC25A41	284427	solute carrier family 25, member 41	1 out of 4	70.1115					70.1115	0.0045	fold change	-1.28
FANCM	57697	Fanconi anemia, complementation group M	1 out of 4	70.1115					70.1115	0.0397	fold change	1.28
ATP23	91419	XRCC6 binding protein 1	1 out of 4	70.031	70.031	0.0309	fold change	1.36
[truncated: 2,642 more rows]
