# Supplementary material for: Physical Activity Rewires the Human Brain against Neurodegeneration
Source: Int J Mol Sci. 2022 Jun 2;23(11):6223. doi: 10.3390/ijms23116223 (PMC9181322; doi:10.3390/ijms23116223)
Supplement: Supplementary file 1 [file ijms-23-06223-s001.zip › Table S7.xlsx]

## Sheet: Sheet1
Table S7: Genetic overlap and correlation analysis between subjects who engaged in high and moderate physical activity and neurodegenerative diseases.
Green denotes significant positive correlations
orange denotes significant negative correlations
Correlations are calculated between BS1 and BS2
						Positive correlation	Positive correlation	Negative correlation	Negative correlation
Datasets	brain tissue	Description	DEGs	Upregulated	Downregulated	Upregulated in BS1: Upregulated in BS2	Downregulated in BS1: downregulated in BS2	Upregulated in BS1: Downregulated in BS2	Downregulated in BS1: Up in BS2
BS1:GSE110298	hippocampus	females with high physical activity vs. low	1733	1191	542	17	2	583	61
BS2:GSE48350	hippocampus	AD patients vs. normal	7514	3024	4490	p=0.2171	p=1	p=2.2 E-193	1e-06
BS1:GSE110298	hippocampus	females with moderate physical activity vs. low	1319	852	467	50	6	88	42
BS2:GSE48350	hippocampus	AD patients vs. normal	7514	3024	4490	p=0.0195	p=1	p=.024	p=0.0148
BS1:GSE110298	hippocampus	males with high physical activity vs.low	649	649	1647	22	14	126	220
BS2:GSE48350	hippocampus	AD patients vs. normal	7514	3024	4490	p=0.7161	p=1	p=9.6E-12	p=3.5 E-22
BS1:GSE110298	hippocampus	males with moderate physical activity vs.low	1079	226	853	3	9	23	200
BS2:GSE48350	hippocampus	AD patients vs. normal	7514	3024	4490	p=0.853	p=0.9995	p=0.0835	p=6.8E-54
BS1:GSE110298	hippocampus	females with moderate physical activity levels vs. low	1319	852	467	0	0	1	0
BS2: GSE84422	hippocampus	AD patients with definite diagnosis	58	56	2	p=1.0	p=1.0	p=0.0083	p=1
BS1:GSE110298	hippocampus	males with high physical activity vs.low	649	649	1647	0	0	0	5
BS2: GSE84422	hippocampus	AD patients with definite diagnosis vs. normal	58	56	2	p=1.0	p=1.0	p=1.0	p=0.0253
BS1:GSE110298	hippocampus	males with moderate physical activity vs.low	1079	226	853	0	0	0	3
BS2: GSE84422	hippocampus	AD patients with definite diagnosis vs. normal	58	56	2	p=1.0	p=1.0	p=1.0	p=0.0449
BS1:GSE110298	hippocampus	females with high physical activity vs. low	1733	1191	542	1	0	9	5
BS2:GSE84422	hippocampus	Probable AD vs. normal	249	166	83	p=1.0	p=1	p=9.9E-5	p=0.0176
BS1:GSE110298	hippocampus	females with moderate physical activity vs. low	1319	852	467	0	0	6	11
BS2:GSE84422	hippocampus	Probable AD vs. normal	249	166	83	p=1.0	p=1.0	p=0.0036	p=1.2E-8
BS1:GSE110298	hippocampus	males with high physical activity vs.low	649	649	1647	1	2	4	9
BS2:GSE84422	hippocampus	Probable AD vs. normal	249	166	83	p=0.4843	p=.1192	p=0.002	p=0.0253
BS1:GSE110298	hippocampus	males with moderate physical activity vs.low	1079	226	853	1	0	1	3
BS2:GSE84422	hippocampus	Probable AD vs. normal	249	166	83	p=.2342	p=1.0	p=.1135	p=.1893
BS1:GSE110298	hippocampus	females with high physical activity vs. low	1532	1028	504	8	6	172	16
BS2: GSE36980	hippocampus	AD patients vs. normal	3020	1276	1744	p=.7049	p=0.357	p=6.1E-21	p=0.0202
BS1:GSE110298	hippocampus	females with moderate physical activity vs. low	1170	734	436	33	29	19	3
BS2:GSE36980	hippocampus	AD patients vs. normal	3020	1276	1744	p=0.0057	p=0.0008	p=1.0	p=0.9012
BS1:GSE110298	hippocampus	males with high physical activity vs.low	1955	609	1346	6	11	88	60
BS2:GSE36980	hippocampus	AD patients vs. normal	3020	1276	1744	p=0.8418	p=1	p=2.3E-6	p=0.0997
BS1:GSE36980	hippocampus	males with moderate physical activity vs.low	975	219	756	1	7	23	42
BS2:GSE36980	hippocampus	AD patients vs. normal	3020	1276	1744	p=0.9498	p=1.0	p=0.0217	p=5.1E-8
BS1:GSE110298	hippocampus	females with high physical activity vs. low	1733	1191	542	7	0	16	11
BS2:GSE13162	hippocampus	FTD-GRN(+) vs. normal	1543	1048	495	p=0.1346	p=1.0	p=0.0017	p=0.0462
BS1:GSE110298	hippocampus	females with moderate physical activity vs. low	1319	852	467	35	3	9	32
BS2:GSE13162	hippocampus	FTD-GRN(+) vs. normal	1543	1048	495	p=2.6E-6	p=0.1576	p=0.2795	p=1.3E-8
BS1:GSE110298	hippocampus	males with high physical activity vs.low	2296	649	1647	2	1	10	110
BS2:GSE13162	hippocampus	FTD-GRN(+) vs. normal	1543	1048	495	p=0.9991	p=1.0	p=0.0529	p=1.8E-15
BS1:GSE110298	hippocampus	males with moderate physical activity vs.low	1079	226	853	2	2	7	80
BS2:GSE13162	hippocampus	FTD-GRN(+) vs. normal	1543	1048	495	p=0.9395	p=0.4632	p=3.0E-4	p=3.3E-16
BS1:GSE110298	hippocampus	females with moderate physical activity vs. low	1319	852	467	18	4	4	6
BS2:GSE13162	hippocampus	FTD-GRN(-) vs. normal	795	545	250	p=0.0078	p=0.0593	0.4223	p=0.0319
BS1:GSE110298	hippocampus	males with high physical activity vs.low	2296	649	1647	5	2	5	47
BS2:GSE13162	hippocampus	FTD-GRN(-) vs. normal	795	545	250	p=0.2103	p=0.9999	p=0.1524	p=9.2E-6
BS1:GSE110298	hippocampus	males with high moderate physical activity vs.low	1079	226	853	1	0	2	45
BS2:GSE13162	hippocampus	FTD-GRN(-) vs. normal	795	545	250	p=0.8571	p=1.0	p=0.0043	p=7.1E-11
BS1:GSE110298	hippocampus	females with high physical activity vs. low	1733	1191	542	63	11	53	13
BS2:GSE7621	Substantia nigra	substantia nigra from postmortem PD vs. normal	4046	2473	1563	p=0.0434	p=0.9251	p=2.3E-6	p=0.0496
BS1:GSE110298	hippocampus	females with moderate physical activity vs. low	1319	852	467	12	4	112	63
BS2:GSE7621	Substantia nigra	substantia nigra from postmortem PD vs. normal	4036	2473	1563	p=0.9956	p=0.2217	p=6.25E-26	p=1.3E-9
BS1:GSE110298	hippocampus	males with high physical activity vs.low	2296	649	1647	5	24	88	331
BS2:GSE7621	Substantia nigra	substantia nigra from postmortem PD vs. normal	4036	2473	1563	p=0.5374	p=0.0157	p=1.3E-22	p=8.6E-58
BS1:GSE110298	hippocampus	males with high moderate physical activity vs.low	1079	226	853	2	8	11	147
BS2:GSE7621	Substantia nigra	substantia nigra from postmortem PD vs. normal	4036	2473	1563	p=0.0076	p=0.9984	p=0.0484	p=7.5E-30
BS1:GSE110298	hippocampus	females with high physical activity vs. low	1733	1191	542	10	0	279	40
BS2:GSE8397	Substantia nigra	substantia nigra from postmortem PD vs. normal	4067	1708	2359	p=0.7777	p=1.0	7.5e-65	p=1.1E-8
BS1:GSE110298	hippocampus	females with moderate physical activity vs. low	1319	852	467	4	3	75	56
BS2:GSE8397	Substantia nigra	substantia nigra from postmortem PD vs. normal	4067	1708	2359	p=0.9996	p=1.0	p=0.0014	p=1.6E-11
BS1:GSE110298	hippocampus	males with high physical activity vs.low	2296	649	1647	3	11	74	328
BS2:GSE8397	Substantia nigra	substantia nigra from postmortem PD vs. normal	4067	1708	2359	p=0.9994	p=.5077	p=5.1 E-9	p=5.3E-97
BS1:GSE110298	hippocampus	males with moderate physical activity vs.low	1079	226	853	0	7	9	165
BS2:GSE8397	Substantia nigra	substantia nigra from postmortem PD vs. normal	4067	1708	2359	p=1.0	p=0.7022	p=0.1242	p=2.9E-49
BS1:GSE110298	hippocampus	females with high physical activity vs. low	1733	1191	542	3	1	119	8
BS2:GSE3790	caudate nucleus	caudate nucleus HD grade 1 vs. control	1129	412	717	p=0.9944	p=0.998	p=1.1E-64	p=0.0002
BS1:GSE110298	hippocampus	females with moderate physical activity vs. low	1319	852	467	3	16	5	13
BS2:GSE3790	caudate nucleus	caudate nucleus HD grade 1 vs. control	1129	412	717	p=0.8412	p=0.0001	p=0.7731	p=2.3E-5
BS1:GSE110298	hippocampus	males with high physical activity vs.low	2296	649	1647	4	4	13	78
BS2:GSE3790	caudate nucleus	caudate nucleus HD grade 1 vs. control	1129	412	717	p=0.4959	p=0.9466	p=0.0083	p=1.4E-46
BS1:GSE110298	hippocampus	males with moderate physical activity vs.low	1079	226	853	0	4	4	40
BS2:GSE3790	caudate nucleus	caudate nucleus HD grade 1 vs. control	1129	412	717	p=1.0	p=0.6058	p=0.1352	p=3.3E-19
Legend
DEG=differentially expressed genes
BS1: bioset 1
BS2: bioset 2
Green=significant positive correlation
Orange=significant negative correlation
