# Supplementary material for: Physical Activity Rewires the Human Brain against Neurodegeneration
Source: Int J Mol Sci. 2022 Jun 2;23(11):6223. doi: 10.3390/ijms23116223 (PMC9181322; doi:10.3390/ijms23116223)
Supplement: Supplementary file 1 [file ijms-23-06223-s001.zip › Table S8.xlsx]

## Sheet: Sheet1
Table S8. Functional analysis of genes upregulated in physically active subjects and downregulated in Alzheimer's disease datasets
Bioset 1: Hippocampi from 76-99yr old female subjects with high physical activity levels _vs_ low (Study: Hippocampi from post-mortem brains of subjects with low, moderate, or high physical activity levels)
Bioset 2: Hippocampi from 76-99yr old female subjects with moderate physical activity levels _vs_ low (Study: Hippocampi from post-mortem brains of subjects with low, moderate, or high physical activity levels)
Bioset 3: Hippocampi from 78-101yr old male subjects with high physical activity levels _vs_ low (Study: Hippocampi from post-mortem brains of subjects with low, moderate, or high physical activity levels)
Bioset 4: Hippocampi from 78-101yr old male subjects with moderate physical activity levels _vs_ low (Study: Hippocampi from post-mortem brains of subjects with low, moderate, or high physical activity levels)
Bioset 5: Hippocampuses from brains of post-mortem Alzheimer's disease patients _vs_ normal donors (Study: Alzheimers disease entorhinal cortexes, hippocampuses, and post central and superior frontal gyruses)
Bioset 6: Hippocampus gray matter of individuals with AD _vs_ without AD (Study: Frontal cortex, hippocampus, and temporal lobe gray matter of Alzheimer's disease patients)
Bioset 7: Hippocampus of patients with definite Alzheimers disease _vs_ normal_GPL97 (Study: Brain regions from patients with dementia and Alzheimer's disease)
Biogroup	Source	Specificity	Overall Biogroup score	Correlated direction - Bioset 1	Common genes - Bioset 1	Score - Bioset 1	p-value - Bioset 1	Correlated direction - Bioset 2	Common genes - Bioset 2	Score - Bioset 2	p-value - Bioset 2	Correlated direction - Bioset 3	Common genes - Bioset 3	Score - Bioset 3	p-value - Bioset 3	Correlated direction - Bioset 4	Common genes - Bioset 4	Score - Bioset 4	p-value - Bioset 4	Correlated direction - Bioset 5	Common genes - Bioset 5	Score - Bioset 5	p-value - Bioset 5	Correlated direction - Bioset 6	Common genes - Bioset 6	Score - Bioset 6	p-value - Bioset 6	Correlated direction - Bioset 7	Common genes - Bioset 7	Score - Bioset 7	p-value - Bioset 7
synaptic signaling	GO	5 out of 7	381.526	upregulated	43	41.3164	1.1e-18	downregulated	4	1.08021	0.3395	upregulated	22	10.8215	2e-05	upregulated	4	4.28855	0.0137	downregulated	175	196.014	7.5e-86	downregulated	114	130.166	2.9e-57
postsynapse	GO	5 out of 7	340.937	upregulated	39	19.9728	2.1e-09	downregulated	11	1.62425	0.1971	upregulated	34	15.0247	3e-07	upregulated	12	8.49143	0.0002	downregulated	194	179.202	1.5e-78	downregulated	126	120.661	4e-53	upregulated	1	0.790942	0.4534
presynapse	GO	5 out of 7	303.821	upregulated	30	17.415	2.7e-08	upregulated	5	1.03527	0.3551	downregulated	17	3.05633	0.0471	upregulated	2	3.11245	0.0445	downregulated	174	175.006	9.9e-77	downregulated	104	110.308	1.2e-48
synaptic membrane	GO	5 out of 7	282.347	upregulated	28	15.4912	1.9e-07	downregulated	5	0.373244	0.6885	upregulated	25	14.7116	4.1e-07	upregulated	9	9.55228	7.1e-05	downregulated	145	144.561	1.7e-63	downregulated	92	99.4984	6.1e-44	upregulated	1	1.09343	0.3351
asymmetric synapse	GO	5 out of 7	236.978	upregulated	21	13.4083	1.5e-06	downregulated	6	1.1243	0.3249	upregulated	24	16.3527	7.9e-08	upregulated	7	4.07378	0.017	downregulated	108	118.536	3.3e-52	downregulated	75	85.7315	5.9e-38
postsynaptic density	GO	5 out of 7	233.178	upregulated	21	13.8338	9.8e-07	downregulated	6	1.18682	0.3052	upregulated	24	16.8327	4.9e-08	upregulated	7	4.19419	0.0151	downregulated	105	116.198	3.4e-51	downregulated	73	83.3063	6.6e-37
postsynaptic specialization	GO	5 out of 7	231.383	upregulated	21	13.726	1.1e-06	downregulated	6	1.17088	0.3101	upregulated	24	16.7112	5.5e-08	upregulated	7	4.16369	0.0156	downregulated	106	115.244	8.9e-51	downregulated	73	82.7093	1.2e-36
regulation of membrane potential	GO	5 out of 7	210.721	upregulated	25	18.3535	1.1e-08	downregulated	8	2.94568	0.0526	upregulated	23	7.99584	0.0003	upregulated	6	4.20939	0.0149	downregulated	145	107.684	1.7e-47	downregulated	92	75.4236	1.8e-33
postsynaptic membrane	GO	5 out of 7	210.296	upregulated	23	13.0835	2.1e-06	downregulated	5	0.78012	0.4584	upregulated	22	15.8199	1.3e-07	upregulated	8	8.6607	0.0002	downregulated	107	101.56	7.8e-45	downregulated	70	73.2662	1.5e-32	upregulated	1	1.31438	0.2686
transmembrane transporter complex	GO	5 out of 7	206.032	upregulated	24	21.1646	6.4e-10	downregulated	7	1.49227	0.2249	upregulated	11	4.43845	0.0118	upregulated	1	2.22299	0.1083	downregulated	131	110.365	1.2e-48	downregulated	77	73.703	9.8e-33	upregulated	1	4.36989	0.0127
distal axon	GO	5 out of 7	204.824	upregulated	19	11.4914	1e-05	upregulated	8	1.17386	0.3092	upregulated	5	2.78639	0.0616	downregulated	11	1.92863	0.1453	downregulated	110	119.646	1.1e-52	downregulated	72	71.6545	7.6e-32
neuronal cell body	GO	3 out of 7	194.128	upregulated	25	5.95831	0.0026	downregulated	9	3.1561	0.0426	downregulated	39	7.41319	0.0006	downregulated	17	3.85131	0.0213	downregulated	167	118.764	2.6e-52	downregulated	107	85.2672	9.3e-38	upregulated	2	1.44005	0.2369
chemical synaptic transmission	GO	4 out of 7	180.819	upregulated	42	38.9629	1.2e-17	downregulated	4	1.13052	0.3229	upregulated	21	11.0061	1.7e-05	upregulated	4	4.4174	0.0121	downregulated	169	192.221	3.3e-84	downregulated	112	127.563	4e-56
exocytic vesicle membrane	GO	5 out of 7	156.487	upregulated	12	14.8156	3.7e-07	downregulated	1	0.163223	0.8494	upregulated	3	0.860862	0.4228	upregulated	1	2.50977	0.0813	downregulated	55	76.0888	9e-34	downregulated	34	62.3753	8.1e-28
passive transmembrane transporter activity	GO	3 out of 7	124.747	upregulated	24	13.0557	2.1e-06	downregulated	6	1.2015	0.3007	downregulated	26	8.11757	0.0003	downregulated	15	3.00019	0.0498	downregulated	140	81.7923	3e-36	downregulated	70	46.2511	8.2e-21	upregulated	3	4.0328	0.0177
regulation of synapse structure or activity	GO	5 out of 7	124.606	upregulated	18	11.0633	1.6e-05	downregulated	5	2.47436	0.0842	upregulated	8	4.72274	0.0089	upregulated	6	7.19365	0.0008	downregulated	70	65.163	5e-29	downregulated	43	38.9381	1.2e-17
cell part morphogenesis	GO	3 out of 7	119.819	upregulated	28	6.52748	0.0015	downregulated	9	1.47746	0.2282	downregulated	40	10.0132	4.5e-05	downregulated	26	3.91881	0.0199	downregulated	128	63.6543	2.3e-28	downregulated	96	65.0468	5.6e-29
vesicle localization	GO	5 out of 7	119.523	upregulated	13	5.88301	0.0028	upregulated	5	0.165569	0.8474	upregulated	11	3.07183	0.0463	downregulated	10	2.7466	0.0641	downregulated	87	67.469	5e-30	downregulated	51	45.6804	1.4e-20
establishment of vesicle localization	GO	5 out of 7	118.126	upregulated	13	6.10264	0.0022	upregulated	5	0.183208	0.8326	upregulated	11	3.22872	0.0396	downregulated	10	2.87842	0.0562	downregulated	85	66.7184	1.1e-29	downregulated	50	44.7711	3.6e-20
regulation of synapse organization	GO	5 out of 7	114.954	upregulated	18	11.5014	1e-05	downregulated	4	2.50352	0.0818	upregulated	8	4.89487	0.0075	upregulated	6	7.35095	0.0006	downregulated	66	60.8283	3.8e-27	downregulated	39	32.8823	5.2e-15
axon development	GO	4 out of 7	114.414	upregulated	23	7.89887	0.0004	upregulated	5	1.31544	0.2684	downregulated	31	8.55717	0.0002	downregulated	23	5.80267	0.003	downregulated	111	58.74	3.1e-26	downregulated	82	60.8192	3.9e-27
growth cone	GO	5 out of 7	108.359	upregulated	12	3.4786	0.0309	upregulated	7	1.54277	0.2138	upregulated	3	1.90957	0.1481	downregulated	8	1.19104	0.3039	downregulated	63	62.4624	7.5e-28	downregulated	42	40.1565	3.6e-18
site of polarized growth	GO	5 out of 7	106.731	upregulated	12	3.43269	0.0323	upregulated	7	1.52664	0.2173	upregulated	3	1.89275	0.1507	downregulated	8	1.1364	0.321	downregulated	63	61.6077	1.8e-27	downregulated	42	39.4079	7.7e-18
cell morphogenesis involved in neuron differentiation	GO	3 out of 7	103.207	upregulated	26	9.45995	7.8e-05	downregulated	8	1.6274	0.1964	downregulated	34	8.71008	0.0002	downregulated	21	3.32616	0.0359	downregulated	112	52.7093	1.3e-23	downregulated	80	54.7014	1.8e-24
synapse organization	GO	3 out of 7	99.9754	upregulated	13	9.77263	5.7e-05	downregulated	5	2.384	0.0922	downregulated	17	8.35276	0.0002	downregulated	8	2.84278	0.0583	downregulated	74	66.0629	2e-29	downregulated	39	37.7194	4.2e-17
synaptic vesicle cycle	GO	5 out of 7	99.3134	upregulated	5	3.45979	0.0314	upregulated	1	0.133963	0.8746	upregulated	5	2.58466	0.0754	downregulated	4	1.33927	0.262	downregulated	46	53.9362	3.8e-24	downregulated	29	40.5381	2.5e-18
positive regulation of neurogenesis	GO	5 out of 7	98.6769	upregulated	22	5.33136	0.0048	upregulated	16	4.53082	0.0108	downregulated	40	13.1125	2e-06	upregulated	7	3.61085	0.027	downregulated	99	49.251	4.1e-22	downregulated	81	49.0654	4.9e-22
establishment of organelle localization	GO	3 out of 7	92.3384	upregulated	22	4.98726	0.0068	downregulated	5	1.75632	0.1727	downregulated	31	8.58247	0.0002	downregulated	20	4.91294	0.0074	downregulated	121	66.5195	1.3e-29	downregulated	63	36.0833	2.1e-16
regulation of synapse assembly	GO	6 out of 7	90.4474	upregulated	14	16.1358	9.8e-08	upregulated	2	1.1051	0.3312	upregulated	6	6.43178	0.0016	upregulated	3	4.27625	0.0139	downregulated	39	40.2153	3.4e-18	downregulated	21	22.2832	2.1e-10
presynaptic active zone	GO	4 out of 7	89.4713	upregulated	4	9.33466	8.8e-05	downregulated	1	1.33892	0.2621	upregulated	2	2.41407	0.0895					downregulated	24	48.7941	6.4e-22	downregulated	16	30.2674	7.2e-14
dendritic spine	GO	5 out of 7	86.1533	upregulated	12	7.54659	0.0005	downregulated	7	3.3794	0.0341	upregulated	11	4.38466	0.0125	upregulated	5	5.41856	0.0044	downregulated	61	49.1517	4.5e-22	downregulated	32	23.0312	9.9e-11
presynaptic membrane	GO	4 out of 7	84.8353	upregulated	6	3.60336	0.0272					downregulated	3	2.44499	0.0867	upregulated	1	2.60145	0.0742	downregulated	40	47.8784	1.6e-21	downregulated	25	30.7521	4.4e-14
perikaryon	GO	5 out of 7	84.808	upregulated	5	2.47407	0.0842	downregulated	3	2.61115	0.0735	upregulated	2	1.88082	0.1525	upregulated	1	0.871616	0.4183	downregulated	52	48.3651	9.9e-22	downregulated	33	33.8275	2e-15
cellular respiration	GO	5 out of 7	84.4268	upregulated	8	1.64558	0.1929	upregulated	8	3.79241	0.0225	upregulated	4	1.81115	0.1635	downregulated	3	1.32457	0.2659	downregulated	61	52.453	1.7e-23	downregulated	32	26.0492	4.9e-12
synaptic vesicle exocytosis	GO	5 out of 7	83.9335	upregulated	3	4.01069	0.0181	upregulated	1	0.380528	0.6835	upregulated	4	3.29875	0.0369	downregulated	2	1.66505	0.1892	downregulated	30	40.2799	3.2e-18	downregulated	20	37.6287	4.6e-17
synaptic vesicle localization	GO	3 out of 7	82.1685	upregulated	6	3.60336	0.0272	downregulated	1	0.362698	0.6958	downregulated	5	3.17071	0.042	downregulated	5	2.21822	0.1088	downregulated	42	44.9328	3.1e-20	downregulated	25	39.384	7.9e-18
regulation of cation channel activity	GO	4 out of 7	80.555	upregulated	13	10.8918	1.9e-05	downregulated	4	1.50783	0.2214	upregulated	5	1.01145	0.3637	downregulated	2	2.72108	0.0658	downregulated	61	51.6076	3.9e-23	downregulated	28	21.2731	5.8e-10
energy derivation by oxidation of organic compounds	GO	5 out of 7	80.142	upregulated	10	1.73062	0.1772	upregulated	9	2.75961	0.0633	upregulated	6	2.32004	0.0983	downregulated	7	2.04293	0.1296	downregulated	72	47.1323	3.4e-21	downregulated	41	28.2424	5.4e-13
channel regulator activity	GO	5 out of 7	79.4839	upregulated	15	14.9566	3.2e-07	upregulated	4	3.37356	0.0343	upregulated	2	1.02801	0.3577	downregulated	2	0.210597	0.8101	downregulated	49	38.1788	2.6e-17	downregulated	28	22.1575	2.4e-10
cellular potassium ion transport	GO	5 out of 7	77.8673	upregulated	8	3.66833	0.0255	upregulated	2	4.52834	0.0108	downregulated	6	1.78784	0.1673	upregulated	3	3.65999	0.0257	downregulated	59	43.8786	8.8e-20	downregulated	31	25.3913	9.4e-12	upregulated	1	1.47142	0.2296
potassium ion transmembrane transport	GO	5 out of 7	77.8673	upregulated	8	3.66833	0.0255	upregulated	2	4.52834	0.0108	downregulated	6	1.78784	0.1673	upregulated	3	3.65999	0.0257	downregulated	59	43.8786	8.8e-20	downregulated	31	25.3913	9.4e-12	upregulated	1	1.47142	0.2296
neurotransmitter receptor activity	GO	5 out of 7	77.7938	upregulated	7	10.1093	4.1e-05	downregulated	1	1.52399	0.2178	upregulated	4	7.15034	0.0008	upregulated	1	3.45706	0.0315	downregulated	31	30.5666	5.3e-14	downregulated	24	28.0344	6.7e-13
ATP metabolic process	GO	4 out of 7	77.3771	upregulated	7	0.835279	0.4338	downregulated	3	1.35707	0.2574	upregulated	5	2.20918	0.1098	downregulated	2	0.168818	0.8447	downregulated	63	47.0918	3.5e-21	downregulated	36	28.7667	3.2e-13
synaptic vesicle transport	GO	3 out of 7	76.7868	upregulated	6	3.62746	0.0266	downregulated	1	0.370782	0.6902	downregulated	5	3.22584	0.0397	downregulated	5	2.26635	0.1037	downregulated	40	41.7335	7.5e-19	downregulated	24	37.2888	6.4e-17
regulation of neurotransmitter secretion	GO	5 out of 7	75.466	upregulated	6	3.43944	0.0321	upregulated	1	2.99185	0.0502	upregulated	4	2.42106	0.0888	downregulated	2	1.44975	0.2346	downregulated	32	46.4289	6.9e-21	downregulated	17	21.6345	4e-10
protein localization to cell periphery	GO	4 out of 7	73.1693	upregulated	17	9.31521	9e-05	upregulated	7	4.19533	0.0151	downregulated	20	5.86612	0.0028	downregulated	8	2.74992	0.0639	downregulated	56	39.6352	6.1e-18	downregulated	40	28.6396	3.6e-13
regulation of exocytosis	GO	4 out of 7	71.5129	upregulated	9	4.13856	0.0159	upregulated	6	1.06259	0.3456	downregulated	15	7.55007	0.0005	downregulated	12	11.0847	1.5e-05	downregulated	60	51.734	3.4e-23	downregulated	36	33.2125	3.8e-15
learning or memory	GO	5 out of 7	71.4806	upregulated	12	6.58619	0.0014	upregulated	7	1.44714	0.2352	upregulated	10	2.49184	0.0828	upregulated	4	3.84481	0.0214	downregulated	100	84.0673	3.1e-37	downregulated	63	57.1106	1.6e-25
GABA receptor complex	GO	5 out of 7	71.1028	upregulated	4	10.2766	3.4e-05					upregulated	1	4.51277	0.011	upregulated	1	4.95268	0.0071	downregulated	11	25.9612	5.3e-12	downregulated	10	25.3996	9.3e-12
guanyl nucleotide binding	GO	5 out of 7	69.4885	upregulated	22	6.45466	0.0016	upregulated	17	2.27886	0.1024	upregulated	18	5.20735	0.0055	upregulated	3	1.8241	0.1614	downregulated	97	41.1609	1.3e-18	downregulated	50	17.8783	1.7e-08	upregulated	3	3.49169	0.0304
adult behavior	GO	4 out of 7	69.3014	upregulated	11	6.09967	0.0022	downregulated	1	0.483806	0.6164	upregulated	9	6.70864	0.0012	downregulated	7	4.62831	0.0098	downregulated	49	37.6478	4.5e-17	downregulated	30	23.9573	3.9e-11
regulation of synaptic vesicle transport	GO	4 out of 7	68.9023	upregulated	3	1.71058	0.1808					upregulated	3	3.01561	0.049	downregulated	1	1.16132	0.3131	downregulated	21	35.5071	3.8e-16	downregulated	15	29.8304	1.1e-13
regulation of neurological system process	GO	5 out of 7	68.8432	upregulated	5	5.57161	0.0038	downregulated	2	2.77053	0.0626	upregulated	7	5.24991	0.0052	upregulated	5	8.45392	0.0002	downregulated	36	26.1523	4.4e-12	downregulated	28	26.186	4.2e-12
modulation of excitatory postsynaptic potential	GO	5 out of 7	66.5059	upregulated	3	3.69438	0.0249	downregulated	2	3.64562	0.0261	upregulated	4	5.37591	0.0046	upregulated	4	9.51692	7.4e-05	downregulated	22	27.4458	1.2e-12	downregulated	16	24.1185	3.4e-11
regulation of dendrite morphogenesis	GO	6 out of 7	65.5205	upregulated	9	2.94339	0.0527	upregulated	5	2.74189	0.0644	upregulated	4	3.52173	0.0295	upregulated	4	6.28942	0.0019	downregulated	30	30.6932	4.7e-14	downregulated	21	19.3309	4e-09
protein localization to plasma membrane	GO	4 out of 7	65.3137	upregulated	14	8.12717	0.0003	upregulated	5	2.61294	0.0733	downregulated	16	4.8634	0.0077	downregulated	6	2.895	0.0553	downregulated	49	35.1877	5.2e-16	downregulated	36	27.1442	1.6e-12
GABA-A receptor complex	GO	5 out of 7	63.4615	upregulated	4	10.4368	2.9e-05					upregulated	1	4.60993	0.01	upregulated	1	5.05002	0.0064	downregulated	10	22.1624	2.4e-10	downregulated	9	21.2023	6.2e-10
positive regulation of excitatory postsynaptic potential	GO	5 out of 7	62.9728	upregulated	3	4.69189	0.0092					upregulated	2	2.44974	0.0863	upregulated	2	6.1138	0.0022	downregulated	17	28.9149	2.8e-13	downregulated	11	20.8025	9.2e-10
ATP hydrolysis coupled cation transmembrane transport	GO	3 out of 7	60.7449	downregulated	1	0.323325	0.7237					upregulated	2	0.746013	0.4743					downregulated	28	38.0688	2.9e-17	downregulated	19	22.2533	2.2e-10
regulation of hormone secretion	GO	6 out of 7	60.4356	upregulated	9	2.12311	0.1197	upregulated	9	1.18763	0.3049	upregulated	14	3.62545	0.0266	upregulated	5	2.91102	0.0544	downregulated	64	28.9472	2.7e-13	downregulated	36	21.6412	4e-10
ATP hydrolysis coupled transmembrane transport	GO	4 out of 7	59.9355	downregulated	2	1.22149	0.2948	upregulated	1	0.110595	0.8953	upregulated	2	0.724206	0.4847					downregulated	28	38.0688	2.9e-17	downregulated	19	22.2533	2.2e-10
ATP hydrolysis coupled ion transmembrane transport	GO	4 out of 7	59.9355	downregulated	2	1.22149	0.2948	upregulated	1	0.110595	0.8953	upregulated	2	0.724206	0.4847					downregulated	28	38.0688	2.9e-17	downregulated	19	22.2533	2.2e-10
regulation of synaptic vesicle exocytosis	GO	4 out of 7	58.4576	upregulated	2	0.99181	0.3709					upregulated	3	3.32933	0.0358	downregulated	1	1.2665	0.2818	downregulated	19	32.2754	9.6e-15	downregulated	12	23.1276	9e-11
regulation of postsynapse organization	GO	5 out of 7	57.6425	upregulated	5	1.24007	0.2894	upregulated	3	2.42245	0.0887	upregulated	4	3.33597	0.0356	upregulated	5	9.71675	6e-05	downregulated	26	28.3881	4.7e-13	downregulated	15	14.9616	3.2e-07
neurotransmitter secretion	GO	4 out of 7	57.4095	upregulated	9	8.54019	0.0002	upregulated	1	0.167673	0.8456	upregulated	5	2.92829	0.0535	downregulated	2	0.993192	0.3704	downregulated	44	52.4176	1.7e-23	downregulated	30	46.7666	4.9e-21
oxidoreductase complex	GO	3 out of 7	56.808	upregulated	5	1.29046	0.2751	downregulated	2	1.98668	0.1372	downregulated	6	2.27157	0.1032	downregulated	3	3.00511	0.0495	downregulated	43	37.6495	4.5e-17	downregulated	26	25.1314	1.2e-11
negative regulation of transport	GO	4 out of 7	56.4866	upregulated	19	2.11193	0.121	upregulated	15	6.88076	0.001	downregulated	26	3.38901	0.0337	downregulated	20	3.26979	0.038	downregulated	103	33.4511	3e-15	downregulated	56	21.1527	6.5e-10	upregulated	1	0.451098	0.6369
sensory perception of pain	GO	5 out of 7	55.9155	upregulated	7	9.86933	5.2e-05	upregulated	1	2.23795	0.1067	upregulated	4	6.69858	0.0012	downregulated	5	4.52855	0.0108	downregulated	26	26.7531	2.4e-12	downregulated	16	14.8851	3.4e-07
neurotransmitter transport	GO	3 out of 7	55.7368	upregulated	13	10.0457	4.3e-05	upregulated	2	0.874164	0.4172	downregulated	10	6.3983	0.0017	downregulated	7	5.67889	0.0034	downregulated	63	64.7956	7.2e-29	downregulated	45	56.8941	2e-25
protein localization to membrane	GO	4 out of 7	55.7192	upregulated	28	5.12112	0.006	upregulated	14	2.22671	0.1079	downregulated	29	2.74162	0.0645	downregulated	18	3.91747	0.0199	downregulated	98	31.6003	1.9e-14	downregulated	65	23.4302	6.7e-11
negative regulation of neuron death	GO	4 out of 7	54.9935	upregulated	13	5.47806	0.0042	upregulated	3	1.74655	0.1744	downregulated	12	4.25632	0.0142	downregulated	7	1.20454	0.2998	downregulated	49	29.6012	1.4e-13	downregulated	35	23.6285	5.5e-11
regulation of neuron death	GO	4 out of 7	54.7448	upregulated	13	2.44819	0.0865	upregulated	5	3.06306	0.0467	downregulated	18	4.02387	0.0179	downregulated	10	2.57126	0.0764	downregulated	64	31.9047	1.4e-14	downregulated	45	23.924	4.1e-11
anchored component of membrane	GO	6 out of 7	53.7871	upregulated	6	5.01113	0.0067	upregulated	1	0.20195	0.8171	upregulated	10	11.5408	9.7e-06	upregulated	5	7.53952	0.0005	downregulated	34	16.0557	1.1e-07	downregulated	17	13.438	1.5e-06
neuron projection guidance	GO	3 out of 7	53.7068	upregulated	15	4.91286	0.0074	downregulated	3	0.304245	0.7377	downregulated	20	6.25158	0.0019	downregulated	14	4.0691	0.0171	downregulated	55	24.6564	2e-11	downregulated	49	34.7625	8e-16
response to anesthetic	GO	4 out of 7	52.2862	upregulated	4	3.9939	0.0184	downregulated	1	2.21102	0.1096	upregulated	4	4.13944	0.0159	downregulated	2	0.510042	0.6005	downregulated	27	29.3832	1.7e-13	downregulated	16	17.4907	2.5e-08
cell surface receptor signaling pathway involved in cell-cell signaling	GO	5 out of 7	52.0345	upregulated	22	4.03407	0.0177	downregulated	6	2.98656	0.0505	upregulated	12	2.85662	0.0575	upregulated	4	1.69473	0.1836	downregulated	78	30.2131	7.6e-14	downregulated	48	19.7036	2.8e-09	upregulated	2	3.48107	0.0308
proton-exporting ATPase activity	GO	4 out of 7	49.9924	upregulated	1	0.237621	0.7885					upregulated	1	0.613312	0.5416					downregulated	16	29.5107	1.5e-13	downregulated	13	19.6308	3e-09
regulation of glutamate receptor signaling pathway	GO	4 out of 7	49.7264	upregulated	4	4.97401	0.0069	downregulated	3	2.91219	0.0544	upregulated	1	0.6126	0.5419	downregulated	1	0.229277	0.7951	downregulated	24	33.4836	2.9e-15	downregulated	11	13.7977	1e-06
ion channel activity	GO	1 out of 7	49.5059	upregulated	22	12.0413	5.9e-06	downregulated	6	1.27349	0.2799	downregulated	24	8.44112	0.0002	upregulated	4	2.98916	0.0503	downregulated	135	86.7218	2.2e-38	downregulated	70	51.1375	6.2e-23	upregulated	2	1.63159	0.1956
syntaxin binding	GO	4 out of 7	49.183	upregulated	4	3.77177	0.023	upregulated	3	0.725	0.4843	downregulated	6	0.97299	0.378	downregulated	5	2.63467	0.0717	downregulated	26	26.817	2.3e-12	downregulated	17	21.4769	4.7e-10
vesicle docking	GO	4 out of 7	49.1002	upregulated	5	7.61816	0.0005	upregulated	3	4.43186	0.0119	downregulated	4	0.455545	0.6341	downregulated	2	0.843805	0.4301	downregulated	22	23.34	7.3e-11	downregulated	12	15.0096	3e-07
regulation of neurotransmitter receptor activity	GO	4 out of 7	49.091	upregulated	3	3.12575	0.0439	downregulated	3	2.74094	0.0645	upregulated	3	4.36794	0.0127					downregulated	24	29.484	1.6e-13	downregulated	11	14.8543	3.5e-07
divalent inorganic cation homeostasis	GO	4 out of 7	48.733	upregulated	13	7.32632	0.0007	upregulated	12	5.96567	0.0026	downregulated	25	6.16494	0.0021	downregulated	12	1.49884	0.2234	downregulated	99	30.5796	5.2e-14	downregulated	50	13.2605	1.7e-06	upregulated	1	0.735366	0.4793
telencephalon development	GO	5 out of 7	48.4863	upregulated	7	0.783143	0.457	upregulated	8	4.63975	0.0097	upregulated	13	7.02668	0.0009	downregulated	11	3.71597	0.0243	downregulated	62	23.0975	9.3e-11	downregulated	34	15.2043	2.5e-07	upregulated	2	2.26504	0.1038
postsynaptic density membrane	GO	4 out of 7	48.43	upregulated	1	3.53791	0.0291					upregulated	1	2.44078	0.0871					downregulated	15	27.5139	1.1e-12	downregulated	8	14.9374	3.3e-07
memory	GO	5 out of 7	47.3731	upregulated	5	5.34556	0.0048	upregulated	3	2.41923	0.089	upregulated	7	4.02848	0.0178	upregulated	4	6.02831	0.0024	downregulated	47	47.0098	3.8e-21	downregulated	30	29.5515	1.5e-13
neuromuscular process	GO	6 out of 7	46.6232	upregulated	3	3.0281	0.0484	upregulated	1	0.0259464	0.9744	upregulated	3	1.29667	0.2734	upregulated	1	1.73808	0.1759	downregulated	34	23.4865	6.3e-11	downregulated	20	17.048	3.9e-08
ATP synthesis coupled electron transport	GO	5 out of 7	46.4522	upregulated	4	1.35502	0.2579	upregulated	3	1.4678	0.2304	upregulated	2	0.813859	0.4431					downregulated	32	28.4844	4.3e-13	downregulated	16	14.3311	6e-07
regulation of potassium ion transmembrane transport	GO	6 out of 7	46.3062	upregulated	6	3.83026	0.0217	upregulated	2	1.86717	0.1546	upregulated	4	2.87133	0.0566	upregulated	1	2.0066	0.1344	downregulated	29	25.464	8.7e-12	downregulated	14	10.2668	3.5e-05
regulation of sodium ion transmembrane transporter activity	GO	4 out of 7	46.2674	upregulated	5	4.51295	0.011	downregulated	2	2.07439	0.1256	upregulated	1	1.4974	0.2237	downregulated	1	0.2751	0.7595	downregulated	22	23.8007	4.6e-11	downregulated	15	18.8058	6.8e-09
mitochondrion organization	GO	4 out of 7	46.2459	downregulated	9	1.36513	0.2553	upregulated	13	1.95798	0.1411	upregulated	15	4.07223	0.017	upregulated	3	1.15322	0.3156	downregulated	128	64.4765	1e-28	downregulated	70	39.0624	1.1e-17
postsynaptic specialization membrane	GO	4 out of 7	46.2156	upregulated	1	3.49655	0.0303					upregulated	1	2.40072	0.0907					downregulated	15	25.9217	5.5e-12	downregulated	8	14.3967	5.6e-07
protein-containing complex disassembly	GO	4 out of 7	45.3668	upregulated	16	2.91628	0.0541	upregulated	13	2.74036	0.0645	downregulated	11	1.28596	0.2764	downregulated	8	1.26364	0.2826	downregulated	63	28.9912	2.6e-13	downregulated	32	13.2685	1.7e-06
synaptic vesicle recycling	GO	4 out of 7	44.8535	upregulated	3	2.32915	0.0974					upregulated	2	1.31492	0.2685	downregulated	2	1.12094	0.326	downregulated	18	19.9459	2.2e-09	downregulated	14	22.3845	1.9e-10
tubulin binding	GO	4 out of 7	44.3325	upregulated	21	4.42685	0.012	upregulated	13	1.7345	0.1765	downregulated	35	9.83566	5.4e-05	downregulated	21	6.52196	0.0015	downregulated	91	35.2129	5.1e-16	downregulated	48	21.0503	7.2e-10	upregulated	2	1.7345	0.1765
membrane depolarization during action potential	GO	4 out of 7	44.1719	upregulated	4	6.38328	0.0017	downregulated	1	1.1864	0.3053	upregulated	2	1.56908	0.2082					downregulated	18	23.9717	3.9e-11	downregulated	10	13.4343	1.5e-06
respiratory chain complex I	GO	3 out of 7	43.9058	upregulated	3	1.59216	0.2035	downregulated	1	1.56139	0.2098									downregulated	24	27.2736	1.4e-12	downregulated	14	16.6015	6.2e-08
microtubule-based transport	GO	4 out of 7	43.6255	upregulated	9	2.67143	0.0692	upregulated	9	3.17859	0.0416	upregulated	4	1.87877	0.1528	downregulated	4	0.748672	0.473	downregulated	44	19.1609	4.8e-09	downregulated	28	20.1559	1.8e-09
regulation of sodium ion transmembrane transport	GO	4 out of 7	42.7885	upregulated	5	3.9374	0.0195	downregulated	2	1.8797	0.1526	upregulated	1	1.31562	0.2683	downregulated	1	0.189217	0.8276	downregulated	24	23.6286	5.5e-11	downregulated	15	15.9758	1.2e-07
response to alkaloid	GO	4 out of 7	42.5388	upregulated	5	3.07425	0.0462	downregulated	1	2.43774	0.0874	upregulated	4	2.91511	0.0542	downregulated	2	0.231184	0.7936	downregulated	33	27.3359	1.3e-12	downregulated	16	11.8825	6.9e-06
positive regulation of dendrite development	GO	5 out of 7	42.4707	upregulated	5	0.74784	0.4734	upregulated	4	1.54365	0.2136	downregulated	6	5.22847	0.0054	upregulated	4	6.66434	0.0013	downregulated	24	20.5877	1.1e-09	downregulated	18	18.1556	1.3e-08
regulation of response to drug	GO	4 out of 7	42.2569	upregulated	6	6.44315	0.0016	upregulated	3	2.36557	0.0939	downregulated	8	3.21338	0.0402	downregulated	3	2.30836	0.0994	downregulated	29	20.5715	1.2e-09	downregulated	17	18.3984	1e-08
voltage-gated potassium channel complex	GO	2 out of 7	42.0781	upregulated	6	7.4807	0.0006					downregulated	3	2.55337	0.0778	downregulated	2	1.5971	0.2025	downregulated	46	53.3058	7.1e-24	downregulated	30	38.7478	1.5e-17
SNARE complex	GO	4 out of 7	41.8417	upregulated	3	3.51828	0.0297	upregulated	4	3.12167	0.0441	downregulated	3	0.415372	0.6601	downregulated	2	1.10444	0.3314	downregulated	19	18.2708	1.2e-08	downregulated	11	18.4508	9.7e-09
localization within membrane	GO	3 out of 7	41.6919	upregulated	8	2.80643	0.0604	downregulated	4	2.10399	0.122	downregulated	10	5.3106	0.0049	downregulated	7	6.19683	0.002	downregulated	40	32.5441	7.3e-15	downregulated	24	19.9527	2.2e-09
regulation of calcium ion transmembrane transporter activity	GO	5 out of 7	41.6145	upregulated	7	6.40708	0.0016	downregulated	2	4.70472	0.0091	upregulated	4	1.64067	0.1938	upregulated	1	0.989171	0.3719	downregulated	33	28.0198	6.8e-13	downregulated	15	9.26246	9.5e-05
regulation of intracellular transport	GO	3 out of 7	41.5883	upregulated	21	3.384	0.0339	downregulated	4	1.95655	0.1413	downregulated	28	3.47368	0.031	downregulated	23	5.25475	0.0052	downregulated	93	25.8902	5.7e-12	downregulated	53	23.5195	6.1e-11	upregulated	1	0.520434	0.5943
positive regulation of dendrite extension	GO	3 out of 7	41.3871					downregulated	1	2.95168	0.0523	upregulated	2	2.73822	0.0647	downregulated	2	2.13526	0.1182	downregulated	13	25.4912	8.5e-12	downregulated	10	18.2446	1.2e-08
regulation of synaptic vesicle recycling	GO	4 out of 7	41.2029	upregulated	3	5.53745	0.0039					upregulated	1	2.49179	0.0828	downregulated	2	2.34029	0.0963	downregulated	14	24.8371	1.6e-11	downregulated	7	10.6769	2.3e-05
regulation of calcium ion transmembrane transport	GO	4 out of 7	40.9794	upregulated	10	5.30233	0.005	downregulated	2	3.84758	0.0213	downregulated	7	2.464	0.0851	upregulated	1	0.655263	0.5193	downregulated	45	30.1827	7.8e-14	downregulated	21	11.1507	1.4e-05
multicellular organismal response to stress	GO	5 out of 7	40.8623	downregulated	2	0.782505	0.4573	upregulated	1	2.02086	0.1325	upregulated	6	8.48682	0.0002	upregulated	1	1.9766	0.1385	downregulated	24	22.177	2.3e-10	downregulated	11	6.98353	0.0009
membrane docking	GO	4 out of 7	40.8542	upregulated	16	8.01399	0.0003	upregulated	12	7.36402	0.0006	downregulated	15	1.85476	0.1565	downregulated	7	1.27827	0.2785	downregulated	49	19.0791	5.2e-09	downregulated	23	9.53011	7.3e-05
cardiac muscle cell contraction	GO	4 out of 7	40.8367	upregulated	4	8.20101	0.0003	downregulated	3	6.08	0.0023	upregulated	2	1.30093	0.2723	downregulated	1	1.614	0.1991	downregulated	18	21.308	5.6e-10	downregulated	13	17.7208	2e-08
proton-transporting two-sector ATPase complex	GO	5 out of 7	40.7368	upregulated	2	1.07977	0.3397	upregulated	1	1.90614	0.1487	upregulated	1	1.6954	0.1835	downregulated	1	0.387871	0.6785	downregulated	17	21.8649	3.2e-10	downregulated	12	14.5785	4.7e-07
regulation of voltage-gated calcium channel activity	GO	5 out of 7	40.6922	upregulated	5	10.5141	2.7e-05	downregulated	1	2.87067	0.0567	upregulated	4	4.26087	0.0141	upregulated	1	1.75748	0.1725	downregulated	13	13.7948	1e-06	downregulated	8	13.2357	1.8e-06
response to metal ion	GO	4 out of 7	40.4987	upregulated	18	2.8604	0.0572	upregulated	14	5.7227	0.0033	downregulated	20	8.89086	0.0001	downregulated	19	6.06224	0.0023	downregulated	84	28.7754	3.2e-13	downregulated	49	19.7471	2.7e-09	upregulated	2	1.65388	0.1913
neurotransmitter receptor activity involved in regulation of postsynaptic membrane potential	GO	3 out of 7	40.4902	upregulated	2	5.6122	0.0037									downregulated	1	1.07863	0.3401	downregulated	9	16.0501	1.1e-07	downregulated	8	19.9066	2.3e-09
transmitter-gated ion channel activity involved in regulation of postsynaptic membrane potential	GO	3 out of 7	40.4902	upregulated	2	5.6122	0.0037									downregulated	1	1.07863	0.3401	downregulated	9	16.0501	1.1e-07	downregulated	8	19.9066	2.3e-09
cytoplasmic side of membrane	GO	4 out of 7	39.9701	upregulated	11	7.29572	0.0007	upregulated	3	1.02295	0.3595	downregulated	14	6.04314	0.0024	upregulated	3	4.66426	0.0094	downregulated	39	20.1457	1.8e-09	downregulated	25	13.9076	9.1e-07
forebrain development	GO	5 out of 7	39.8109	upregulated	15	1.05395	0.3486	upregulated	10	3.83786	0.0215	downregulated	26	8.46669	0.0002	upregulated	8	3.00721	0.0494	downregulated	80	25.7855	6.3e-12	downregulated	45	16.2283	9e-08	upregulated	2	1.63531	0.1949
establishment of protein localization to mitochondrion	GO	4 out of 7	39.7238	upregulated	6	1.99799	0.1356					upregulated	3	2.1654	0.1147					downregulated	29	24.5008	2.3e-11	downregulated	14	11.0596	1.6e-05
regulation of supramolecular fiber organization	GO	4 out of 7	39.5455	upregulated	22	5.79217	0.0031	upregulated	15	3.60864	0.0271	downregulated	31	6.60128	0.0014	downregulated	16	7.73376	0.0004	downregulated	72	18.49	9.3e-09	downregulated	53	25.9897	5.2e-12
neuromuscular junction	GO	4 out of 7	39.4482	upregulated	2	3.95803	0.0191	upregulated	2	1.28104	0.2777	downregulated	4	3.05824	0.047	downregulated	3	2.77146	0.0626	downregulated	22	27.0737	1.7e-12	downregulated	13	12.9651	2.3e-06
sodium ion transmembrane transport	GO	5 out of 7	39.2703	upregulated	5	3.35623	0.0349	upregulated	1	0.0790384	0.924	upregulated	4	6.83004	0.0011	downregulated	3	0.844632	0.4297	downregulated	38	18.5929	8.4e-09	downregulated	24	12.9317	2.4e-06	upregulated	1	1.67508	0.1873
clathrin binding	GO	3 out of 7	38.2282	upregulated	3	2.46979	0.0846	downregulated	1	0.626826	0.5343	downregulated	5	2.7442	0.0643	downregulated	1	2.36766	0.0937	downregulated	26	25.2694	1.1e-11	downregulated	15	16.2277	9e-08
chloride transmembrane transport	GO	4 out of 7	38.0966	upregulated	6	5.71007	0.0033	upregulated	3	1.19729	0.302	downregulated	7	4.72812	0.0088	downregulated	6	4.81231	0.0081	downregulated	20	17.796	1.9e-08	downregulated	16	22.9336	1.1e-10
cardiac muscle cell action potential involved in contraction	GO	4 out of 7	37.847	upregulated	4	8.41364	0.0002	downregulated	3	6.18725	0.0021	upregulated	2	1.4503	0.2345	downregulated	1	1.70873	0.1811	downregulated	16	19.7474	2.7e-09	downregulated	12	16.1316	9.9e-08
dendritic shaft	GO	4 out of 7	37.6493	upregulated	3	2.99858	0.0499	downregulated	2	2.2165	0.109	downregulated	3	4.87692	0.0076	upregulated	1	1.98116	0.1379	downregulated	19	24.5397	2.2e-11	downregulated	11	15.2233	2.4e-07
cardiac muscle cell action potential	GO	3 out of 7	37.4742	upregulated	4	7.51372	0.0005	downregulated	3	5.70272	0.0033	downregulated	1	1.06181	0.3458	downregulated	1	1.44557	0.2356	downregulated	21	22.7224	1.4e-10	downregulated	13	15.4482	2e-07
tricarboxylic acid metabolic process	GO	4 out of 7	37.359	upregulated	2	0.693252	0.4999					upregulated	3	3.21846	0.04					downregulated	18	18.0386	1.5e-08	downregulated	13	15.4087	2e-07
regulation of dendrite extension	GO	3 out of 7	36.9146					downregulated	1	2.87381	0.0565	upregulated	2	2.66089	0.0699	downregulated	3	3.53564	0.0291	downregulated	13	23.6588	5.3e-11	downregulated	10	17.0044	4.1e-08
regulation of axonogenesis	GO	3 out of 7	36.8493	downregulated	6	6.40808	0.0016	upregulated	5	0.848376	0.4281	downregulated	22	13.4123	1.5e-06	downregulated	14	5.77679	0.0031	downregulated	57	36.5038	1.4e-16	downregulated	36	25.0943	1.3e-11
rhythmic process	GO	6 out of 7	36.8232	upregulated	20	4.60869	0.01	upregulated	12	4.25218	0.0142	upregulated	10	3.30183	0.0368	upregulated	6	5.2669	0.0052	downregulated	48	7.66715	0.0005	downregulated	32	11.7264	8.1e-06
positive regulation of protein localization to membrane	GO	4 out of 7	36.7826	upregulated	9	2.46517	0.085	upregulated	5	1.9531	0.1418	downregulated	8	2.29025	0.1012	downregulated	6	2.96586	0.0515	downregulated	33	17.4964	2.5e-08	downregulated	24	20.1241	1.8e-09
vesicle organization	GO	5 out of 7	36.4539	upregulated	14	3.05366	0.0472	upregulated	16	3.54275	0.0289	upregulated	10	1.51831	0.2191	downregulated	16	2.98513	0.0505	downregulated	75	17.1517	3.6e-08	downregulated	35	14.1726	7e-07
social behavior	GO	5 out of 7	36.1472	upregulated	4	3.21838	0.04					upregulated	5	4.394	0.0124	upregulated	2	3.54682	0.0288	downregulated	18	18.2255	1.2e-08	downregulated	9	6.76253	0.0012
coenzyme binding	GO	6 out of 7	36.0514	upregulated	10	0.492943	0.6108	upregulated	20	10.2981	3.4e-05	upregulated	12	5.27765	0.0051	upregulated	7	9.42874	8e-05	downregulated	50	6.24108	0.0019	downregulated	25	4.31292	0.0134
anion transmembrane transport	GO	4 out of 7	35.8753	upregulated	16	5.03261	0.0065	upregulated	7	0.966879	0.3803	upregulated	8	6.2706	0.0019	downregulated	17	6.12541	0.0022	downregulated	65	18.0707	1.4e-08	downregulated	35	14.4512	5.3e-07	upregulated	1	1.82437	0.1613
generation of precursor metabolites and energy	GO	1 out of 7	35.7333	upregulated	11	1.24741	0.2872	upregulated	15	3.42172	0.0327	upregulated	11	4.0725	0.017	downregulated	12	1.71244	0.1804	downregulated	110	56.9642	1.8e-25	downregulated	63	35.7333	3e-16
regulation of protein catabolic process	GO	4 out of 7	35.7231	upregulated	23	1.76264	0.1716	upregulated	20	3.89683	0.0203	downregulated	23	2.14669	0.1169	downregulated	17	1.18216	0.3066	downregulated	86	24.6837	1.9e-11	downregulated	37	8.70872	0.0002
lyase activity	GO	6 out of 7	35.7151	upregulated	9	4.99695	0.0068	upregulated	8	2.73935	0.0646	upregulated	9	5.39768	0.0045	upregulated	4	4.9939	0.0068	downregulated	42	14.605	4.5e-07	downregulated	15	2.98223	0.0507
regulation of blood circulation	GO	3 out of 7	35.5265	downregulated	4	3.86166	0.021	upregulated	8	3.58376	0.0278	downregulated	17	3.55541	0.0286	downregulated	11	2.84128	0.0584	downregulated	64	28.477	4.3e-13	downregulated	33	13.7241	1.1e-06
regulation of regulated secretory pathway	GO	4 out of 7	35.4473	upregulated	4	0.395931	0.6731	upregulated	4	1.71091	0.1807	downregulated	12	9.92653	4.9e-05	downregulated	10	15.143	2.7e-07	downregulated	38	30.6991	4.7e-14	downregulated	25	27.7109	9.2e-13
response to xenobiotic stimulus	GO	3 out of 7	35.1073	downregulated	5	3.77494	0.0229	upregulated	9	3.24854	0.0388	upregulated	7	1.86658	0.1547	downregulated	7	1.66861	0.1885	downregulated	62	22.7243	1.4e-10	downregulated	35	15.9599	1.2e-07
fear response	GO	3 out of 7	35.0658	downregulated	2	1.41434	0.2431	downregulated	1	1.0759	0.341	upregulated	4	10.5277	2.7e-05					downregulated	15	17.1319	3.6e-08	downregulated	9	9.89655	5e-05
regulation of microtubule polymerization or depolymerization	GO	4 out of 7	35.0447	upregulated	6	3.4315	0.0323	upregulated	3	0.919243	0.3988	downregulated	8	1.85669	0.1562	downregulated	3	0.745353	0.4746	downregulated	25	19.7007	2.8e-09	downregulated	16	13.5953	1.2e-06
receptor localization to synapse	GO	3 out of 7	34.667	upregulated	4	2.71182	0.0664	downregulated	3	3.98166	0.0187	downregulated	2	1.26505	0.2822					downregulated	18	23.9617	3.9e-11	downregulated	9	13.2402	1.8e-06
membrane depolarization during cardiac muscle cell action potential	GO	4 out of 7	34.6515	upregulated	3	5.90407	0.0027	downregulated	1	1.58958	0.204	upregulated	2	2.31252	0.099					downregulated	10	16.6178	6.1e-08	downregulated	7	11.4067	1.1e-05
organelle transport along microtubule	GO	2 out of 7	34.3419	downregulated	2	2.68223	0.0684	downregulated	2	3.27522	0.0378	downregulated	5	1.93702	0.1441	downregulated	1	1.24792	0.2871	downregulated	29	23.139	8.9e-11	downregulated	18	17.663	2.1e-08
response to amyloid-beta	GO	4 out of 7	34.3292	downregulated	1	1.5617	0.2098	upregulated	1	3.15378	0.0427	upregulated	2	2.19167	0.1117	downregulated	2	0.960177	0.3828	downregulated	14	16.6638	5.8e-08	downregulated	10	14.8419	3.6e-07
axolemma	GO	5 out of 7	34.2383	upregulated	1	2.5685	0.0767	downregulated	1	0.998093	0.3686	upregulated	1	7.6045	0.0005	upregulated	1	4.00194	0.0183	downregulated	8	14.035	8e-07	downregulated	4	7.02642	0.0009
protein localization to postsynaptic membrane	GO	4 out of 7	33.9861	upregulated	3	3.44928	0.0318	downregulated	2	3.61946	0.0268	upregulated	1	3.08419	0.0458					downregulated	9	19.382	3.8e-09	downregulated	4	11.6901	8.4e-06
PDZ domain binding	GO	6 out of 7	33.823	upregulated	9	6.13813	0.0022	upregulated	2	2.42512	0.0885	upregulated	7	3.64808	0.026	upregulated	2	1.97262	0.1391	downregulated	22	14.5255	4.9e-07	downregulated	10	6.79833	0.0011	upregulated	1	1.68486	0.1855
learning	GO	3 out of 7	33.7474	upregulated	5	2.58694	0.0752	downregulated	2	0.834409	0.4341	upregulated	7	3.00304	0.0496	downregulated	6	2.68379	0.0683	downregulated	62	55.3033	9.6e-25	downregulated	35	31.6756	1.8e-14
axon cytoplasm	GO	5 out of 7	33.7017	upregulated	5	2.99264	0.0502	downregulated	2	1.2638	0.2826	upregulated	2	1.54104	0.2142	upregulated	1	1.46225	0.2317	downregulated	19	15.5525	1.8e-07	downregulated	12	13.4171	1.5e-06
proton transmembrane transport	GO	5 out of 7	33.7008	upregulated	6	2.0059	0.1345	upregulated	4	1.36635	0.255	upregulated	5	2.22488	0.1081	upregulated	2	1.63735	0.1945	downregulated	48	34.7284	8.3e-16	downregulated	32	27.9165	7.5e-13	upregulated	1	1.45021	0.2345
acid secretion	GO	5 out of 7	33.624	upregulated	2	3.32844	0.0358	upregulated	1	0.119722	0.8872	upregulated	3	6.15366	0.0021	downregulated	1	1.96343	0.1404	downregulated	14	15.1861	2.5e-07	downregulated	10	10.7995	2e-05
mitochondrial inner membrane	GO	1 out of 7	33.409	upregulated	27	5.62562	0.0036	upregulated	15	5.36053	0.0047	upregulated	10	1.51302	0.2202	upregulated	2	0.351718	0.7035	downregulated	137	84.3545	2.3e-37	downregulated	65	33.409	3.1e-15
regulation of cyclase activity	GO	6 out of 7	33.0494	upregulated	3	1.41753	0.2423	upregulated	2	5.80213	0.003	upregulated	4	4.04265	0.0176	upregulated	2	3.73906	0.0238	downregulated	11	8.06401	0.0003	downregulated	10	9.98401	4.6e-05
regulation of cell morphogenesis	GO	2 out of 7	33.021	downregulated	15	7.30153	0.0007	downregulated	6	1.44267	0.2363	downregulated	62	25.4796	8.6e-12	downregulated	36	16.2531	8.7e-08	downregulated	125	47.3341	2.8e-21	downregulated	75	37.8896	3.5e-17	upregulated	1	1.72582	0.178
positive regulation of voltage-gated calcium channel activity	GO	4 out of 7	32.6315	upregulated	4	12.0956	5.6e-06					upregulated	1	1.41794	0.2422					downregulated	5	9.03724	0.0001	downregulated	4	10.0807	4.2e-05
axonal transport	GO	4 out of 7	32.3174	downregulated	2	2.98459	0.0506	downregulated	2	1.13841	0.3203	upregulated	2	1.39359	0.2482	upregulated	1	1.38118	0.2513	downregulated	19	14.5886	4.6e-07	downregulated	14	16.0924	1e-07
regulation of cardiac conduction	GO	4 out of 7	31.9916	downregulated	1	0.256353	0.7739	upregulated	3	4.52643	0.0108	upregulated	4	2.17103	0.1141	downregulated	3	1.15184	0.3161	downregulated	21	20.5416	1.2e-09	downregulated	8	6.16072	0.0021
carboxylic acid transport	GO	5 out of 7	31.8386	upregulated	11	3.4048	0.0332	upregulated	7	1.3178	0.2677	upregulated	10	7.81942	0.0004	downregulated	9	2.72607	0.0655	downregulated	42	13.2505	1.8e-06	downregulated	26	10.7946	2.1e-05	upregulated	1	2.02245	0.1323
organic acid transport	GO	5 out of 7	31.8386	upregulated	11	3.4048	0.0332	upregulated	7	1.3178	0.2677	upregulated	10	7.81942	0.0004	downregulated	9	2.72607	0.0655	downregulated	42	13.2505	1.8e-06	downregulated	26	10.7946	2.1e-05	upregulated	1	2.02245	0.1323
nucleoside phosphate catabolic process	GO	4 out of 7	31.7077	upregulated	1	1.04845	0.3505	downregulated	2	0.84596	0.4291	downregulated	5	2.45465	0.0859	upregulated	2	1.17929	0.3075	downregulated	33	19.1139	5e-09	downregulated	19	13.6666	1.2e-06
pigment granule localization	GO	4 out of 7	31.6628	upregulated	4	4.65905	0.0095					upregulated	3	3.8838	0.0206					downregulated	12	13.6946	1.1e-06	downregulated	7	9.42538	8.1e-05
sodium channel regulator activity	GO	3 out of 7	31.6088	upregulated	3	6.91906	0.001	downregulated	1	2.50737	0.0815									downregulated	12	14.523	4.9e-07	downregulated	10	12.6741	3.1e-06
regulation of long-term synaptic potentiation	GO	5 out of 7	31.3624	upregulated	2	5.60421	0.0037	upregulated	2	3.14883	0.0429	upregulated	1	2.06631	0.1267					downregulated	13	14.8922	3.4e-07	downregulated	6	5.65083	0.0035
nucleotide catabolic process	GO	4 out of 7	31.0962	upregulated	1	1.09456	0.3347	downregulated	2	0.889058	0.411	downregulated	5	2.66595	0.0695	upregulated	2	1.25653	0.2846	downregulated	32	19.3592	3.9e-09	downregulated	18	12.9409	2.4e-06
cardiac conduction	GO	4 out of 7	30.8386	upregulated	3	2.93975	0.0529	downregulated	2	3.21291	0.0402	upregulated	3	1.35653	0.2576	downregulated	1	1.14704	0.3176	downregulated	25	21.1822	6.3e-10	downregulated	12	9.72	6e-05
sensory perception of mechanical stimulus	GO	5 out of 7	30.6648	upregulated	9	3.47676	0.0309	upregulated	4	2.40727	0.0901	downregulated	12	6.23835	0.002	upregulated	1	1.95607	0.1414	downregulated	28	12.7578	2.9e-06	downregulated	20	16.3053	8.3e-08
amino acid transport	GO	4 out of 7	30.4052	upregulated	6	6.26212	0.0019	upregulated	2	2.77772	0.0622	upregulated	5	8.49919	0.0002	downregulated	5	2.18313	0.1127	downregulated	26	17.77	1.9e-08	downregulated	16	15.0493	2.9e-07
neuron projection extension	GO	4 out of 7	30.1496	upregulated	3	2.24281	0.1062	upregulated	3	3.1038	0.0449	downregulated	4	2.65705	0.0702	downregulated	3	2.57529	0.0761	downregulated	20	11.3758	1.1e-05	downregulated	15	18.6596	7.9e-09
mitotic cell cycle phase transition	GO	4 out of 7	30.149	upregulated	21	5.12675	0.0059	upregulated	26	20.5791	1.2e-09	downregulated	26	5.14984	0.0058	downregulated	18	5.88924	0.0028	downregulated	56	10.8694	1.9e-05	downregulated	23	4.61286	0.0099
cullin-RING ubiquitin ligase complex	GO	4 out of 7	30.1298	upregulated	19	10.8299	2e-05	upregulated	8	2.55874	0.0774	downregulated	9	0.744264	0.4751	downregulated	3	0.362861	0.6957	downregulated	41	11.0609	1.6e-05	downregulated	19	6.78746	0.0011
exploration behavior	GO	4 out of 7	30.1297	upregulated	1	2.32704	0.0976	upregulated	1	0.607549	0.5447									downregulated	10	11.5587	9.6e-06	downregulated	9	15.6364	1.6e-07
regulation of actin filament organization	GO	4 out of 7	30.1196	upregulated	15	3.83809	0.0215	upregulated	12	4.93548	0.0072	downregulated	23	5.4434	0.0043	downregulated	10	5.45805	0.0043	downregulated	52	11.5495	9.6e-06	downregulated	41	20.6981	1e-09
potassium channel regulator activity	GO	4 out of 7	29.9294	upregulated	6	7.64588	0.0005	downregulated	2	3.92708	0.0197	upregulated	1	1.96781	0.1398	downregulated	1	0.750077	0.4723	downregulated	17	14.8811	3.4e-07	downregulated	11	10.1117	4.1e-05
mitochondrial gene expression	GO	5 out of 7	29.6402	upregulated	11	4.06515	0.0172	upregulated	7	2.94399	0.0527	upregulated	6	2.15579	0.1158	downregulated	4	1.8924	0.1507	downregulated	39	14.0577	7.8e-07	downregulated	19	8.30997	0.0002
peptide hormone secretion	GO	5 out of 7	29.5862	upregulated	1	0.366602	0.6931					upregulated	3	2.60406	0.074	upregulated	1	1.41068	0.244	downregulated	20	14.4755	5.2e-07	downregulated	9	10.7294	2.2e-05
regulation of high voltage-gated calcium channel activity	GO	4 out of 7	29.5462	upregulated	4	11.1062	1.5e-05					upregulated	2	2.67888	0.0686					downregulated	7	9.59669	6.8e-05	downregulated	4	6.16447	0.0021
proton-transporting V-type ATPase complex	GO	3 out of 7	29.4995	upregulated	1	0.394074	0.6743									downregulated	1	0.667563	0.513	downregulated	10	17.8802	1.7e-08	downregulated	9	11.8928	6.8e-06
negative regulation of cation channel activity	GO	6 out of 7	29.257	upregulated	4	4.19587	0.0151	upregulated	1	2.48404	0.0834	upregulated	2	1.29943	0.2727	upregulated	1	1.66745	0.1887	downregulated	15	14.7724	3.8e-07	downregulated	7	4.83788	0.0079
postsynaptic density organization	GO	5 out of 7	29.2227	upregulated	2	4.34383	0.013					upregulated	2	4.5912	0.0101	upregulated	2	6.00499	0.0025	downregulated	6	7.82249	0.0004	downregulated	4	6.46024	0.0016
cofactor binding	GO	4 out of 7	29.1368	downregulated	10	1.21295	0.2973	upregulated	25	7.89361	0.0004	upregulated	17	4.46405	0.0115	upregulated	8	6.47206	0.0015	downregulated	87	11.1202	1.5e-05	downregulated	44	6.87192	0.001
cardiac muscle contraction	GO	5 out of 7	28.9764	upregulated	5	5.68136	0.0034	downregulated	4	6.13054	0.0022	upregulated	4	1.77354	0.1697	upregulated	2	3.26048	0.0384	downregulated	20	14.7094	4.1e-07	downregulated	13	9.68214	6.2e-05
Golgi vesicle transport	GO	3 out of 7	28.889	downregulated	6	1.35555	0.2578	upregulated	15	1.19134	0.3038	downregulated	27	1.94947	0.1424	downregulated	16	2.40102	0.0906	downregulated	87	17.6085	2.3e-08	downregulated	45	15.7952	1.4e-07
membrane coat	GO	3 out of 7	28.8285	downregulated	3	1.74875	0.174	downregulated	3	1.20941	0.2984	downregulated	6	1.73587	0.1762	upregulated	2	1.94882	0.1424	downregulated	34	16.8084	5e-08	downregulated	20	14.7654	3.9e-07
calmodulin binding	GO	1 out of 7	28.7529	upregulated	7	4.45174	0.0117	downregulated	2	1.66911	0.1884	downregulated	20	3.19693	0.0409	downregulated	10	3.38833	0.0338	downregulated	59	45.8675	1.2e-20	downregulated	35	29.7886	1.2e-13	upregulated	1	1.03566	0.355
neurotransmitter binding	GO	5 out of 7	28.72	upregulated	2	2.86204	0.0572	upregulated	2	2.20014	0.1108	upregulated	2	1.13844	0.3203	upregulated	1	1.56112	0.2099	downregulated	14	9.50841	7.4e-05	downregulated	10	14.3119	6.1e-07
axon guidance	GO	2 out of 7	28.6044	upregulated	15	4.95215	0.0071	downregulated	3	0.30954	0.7338	downregulated	20	6.33959	0.0018	downregulated	14	4.11551	0.0163	downregulated	53	24.883	1.6e-11	downregulated	48	34.4169	1.1e-15
extrinsic component of membrane	GO	5 out of 7	28.3583	upregulated	12	4.39457	0.0123	upregulated	5	4.30172	0.0135	downregulated	16	3.54892	0.0288	downregulated	20	6.05089	0.0024	downregulated	51	14.4749	5.2e-07	downregulated	31	11.0746	1.6e-05	downregulated	1	3.71226	0.0244
amino acid binding	GO	6 out of 7	28.2911	upregulated	2	1.68981	0.1846	upregulated	4	5.65545	0.0035	upregulated	6	5.75405	0.0032	upregulated	1	2.95422	0.0521	downregulated	14	7.15824	0.0008	downregulated	8	5.07933	0.0062
proton-transporting two-sector ATPase complex, catalytic domain	GO	2 out of 7	28.2865																	downregulated	10	16.9034	4.6e-08	downregulated	7	11.383	1.1e-05
regulation of NMDA receptor activity	GO	4 out of 7	28.1132	upregulated	2	4.1564	0.0157					upregulated	1	1.30077	0.2723					downregulated	10	13.0334	2.2e-06	downregulated	5	9.62266	6.6e-05
cellular response to amyloid-beta	GO	3 out of 7	28.0192	downregulated	1	1.62249	0.1974	upregulated	1	3.25023	0.0388	upregulated	2	2.2561	0.1048	downregulated	1	0.851704	0.4267	downregulated	13	15.0579	2.9e-07	downregulated	9	12.1852	5.1e-06
channel inhibitor activity	GO	4 out of 7	27.9253	upregulated	4	2.97366	0.0511	upregulated	3	5.44871	0.0043	downregulated	3	0.665527	0.514	downregulated	1	0.44446	0.6412	downregulated	13	12.4085	4.1e-06	downregulated	6	8.20439	0.0003
positive regulation of cation transmembrane transport	GO	3 out of 7	27.9067	upregulated	7	4.34178	0.013	downregulated	1	2.31896	0.0984	downregulated	8	5.87309	0.0028	downregulated	3	2.85642	0.0575	downregulated	41	25.1285	1.2e-11	downregulated	19	9.48486	7.6e-05
phenol-containing compound metabolic process	GO	4 out of 7	27.7702	upregulated	5	1.7938	0.1663	upregulated	2	4.3338	0.0131	upregulated	4	2.76784	0.0628	downregulated	5	3.51999	0.0296	downregulated	17	14.2817	6.3e-07	downregulated	11	10.8809	1.9e-05
hormone binding	GO	6 out of 7	27.5048	upregulated	2	2.18159	0.1129	upregulated	2	2.16227	0.1151	upregulated	5	3.75172	0.0235	upregulated	4	6.44646	0.0016	downregulated	18	7.75755	0.0004	downregulated	15	10.0061	4.5e-05	upregulated	1	4.80083	0.0082
cell cycle phase transition	GO	4 out of 7	27.4215	upregulated	21	4.73257	0.0088	upregulated	26	19.7784	2.6e-09	downregulated	27	5.24249	0.0053	downregulated	19	6.40972	0.0016	downregulated	57	10.2919	3.4e-05	downregulated	23	4.27093	0.014
L-type voltage-gated calcium channel complex	GO	4 out of 7	27.4052	upregulated	3	8.34723	0.0002	downregulated	1	2.06234	0.1272	upregulated	2	3.22222	0.0399					downregulated	7	11.1517	1.4e-05	downregulated	3	6.7464	0.0012
regulation of potassium ion transmembrane transporter activity	GO	5 out of 7	27.1032	upregulated	4	1.56207	0.2097	downregulated	3	2.38855	0.0918	upregulated	3	2.40439	0.0903	upregulated	1	2.29269	0.101	downregulated	20	18.3023	1.1e-08	downregulated	8	4.93037	0.0072
regulation of action potential	GO	3 out of 7	27.0568	upregulated	5	6.56293	0.0014	downregulated	1	2.98092	0.0507	downregulated	5	2.10998	0.1212	downregulated	1	1.30755	0.2705	downregulated	17	14.1759	7e-07	downregulated	12	12.7165	3e-06
regulation of behavior	GO	5 out of 7	26.8106	upregulated	6	6.3232	0.0018	upregulated	3	1.5362	0.2152	upregulated	1	1.48385	0.2268	downregulated	2	1.1783	0.3078	downregulated	20	12.4955	3.7e-06	downregulated	10	6.15017	0.0021
negative regulation of establishment of protein localization	GO	4 out of 7	26.7675	upregulated	8	2.39406	0.0913	upregulated	4	3.12271	0.044	downregulated	3	0.523886	0.5922	downregulated	4	0.773452	0.4614	downregulated	35	11.3365	1.2e-05	downregulated	21	12.3618	4.3e-06	upregulated	1	1.15018	0.3166
vitamin binding	GO	6 out of 7	26.6366	upregulated	5	4.32797	0.0132	upregulated	8	6.68239	0.0013	upregulated	8	5.23432	0.0053	upregulated	3	2.97664	0.051	downregulated	24	5.4222	0.0044	downregulated	10	1.99312	0.1363
vesicle docking involved in exocytosis	GO	3 out of 7	26.4278	upregulated	4	8.44721	0.0002	upregulated	1	3.07039	0.0464	downregulated	2	0.269698	0.7636	downregulated	1	0.835979	0.4334	downregulated	18	22.5938	1.5e-10	downregulated	10	16.0159	1.1e-07
response to nerve growth factor	GO	6 out of 7	26.104	upregulated	1	0.221957	0.8009	upregulated	4	3.33784	0.0355	upregulated	3	2.73907	0.0646	upregulated	2	3.26968	0.038	downregulated	15	11.3708	1.2e-05	downregulated	7	5.16468	0.0057
cell communication involved in cardiac conduction	GO	4 out of 7	25.9933	upregulated	2	2.13202	0.1186	downregulated	2	3.72928	0.024	upregulated	3	2.24959	0.1054	downregulated	1	1.52129	0.2184	downregulated	17	18.5067	9.2e-09	downregulated	9	8.35551	0.0002
regulation of heart rate by cardiac conduction	GO	5 out of 7	25.7737	upregulated	3	4.18128	0.0153	upregulated	3	3.54432	0.0289	upregulated	2	1.34349	0.2609	downregulated	1	1.64128	0.1937	downregulated	13	10.4123	3e-05	downregulated	8	7.93356	0.0004
dendrite development	GO	4 out of 7	25.4984	downregulated	6	4.04575	0.0175	downregulated	4	2.81122	0.0601	upregulated	8	3.62132	0.0267	upregulated	2	2.18307	0.1127	downregulated	33	15.5377	1.8e-07	downregulated	17	11.0133	1.6e-05
cellular response to nerve growth factor stimulus	GO	6 out of 7	25.3991	upregulated	1	0.243817	0.7836	upregulated	3	2.38055	0.0925	upregulated	3	2.8946	0.0553	upregulated	2	3.3659	0.0345	downregulated	13	11.1089	1.5e-05	downregulated	7	5.40536	0.0045
regulation of tube diameter	GO	5 out of 7	25.3305	upregulated	5	2.99683	0.0499	upregulated	5	3.54271	0.0289	upregulated	9	6.17545	0.0021	downregulated	6	3.62581	0.0266	downregulated	16	7.08327	0.0008	downregulated	12	9.15802	0.0001
regulation of blood vessel diameter	GO	5 out of 7	25.3305	upregulated	5	2.99683	0.0499	upregulated	5	3.54271	0.0289	upregulated	9	6.17545	0.0021	downregulated	6	3.62581	0.0266	downregulated	16	7.08327	0.0008	downregulated	12	9.15802	0.0001
methylation	GO	6 out of 7	25.323	upregulated	22	3.72058	0.0242	upregulated	24	10.5653	2.6e-05	upregulated	7	2.50254	0.0819	upregulated	3	6.0163	0.0024	downregulated	49	1.807	0.1641	downregulated	18	1.73618	0.1762	upregulated	1	1.02498	0.3588
regulation of cellular protein catabolic process	GO	4 out of 7	25.1875	upregulated	19	2.92928	0.0534	upregulated	14	3.50156	0.0302	downregulated	16	2.82354	0.0594	downregulated	12	1.23931	0.2896	downregulated	60	17.4933	2.5e-08	downregulated	23	5.32626	0.0049
regulation of calcium ion transmembrane transport via high voltage-gated calcium channel	GO	5 out of 7	25.1526	upregulated	2	4.14642	0.0158	upregulated	1	1.73973	0.1756	upregulated	2	2.95168	0.0523					downregulated	6	9.18834	0.0001	downregulated	3	7.12644	0.0008
retina development in camera-type eye	GO	4 out of 7	25.0519	upregulated	10	5.4455	0.0043	upregulated	5	2.35291	0.0951	downregulated	9	2.778	0.0622	downregulated	6	1.30888	0.2701	downregulated	27	12.399	4.1e-06	downregulated	15	8.94134	0.0001
cellular pigmentation	GO	4 out of 7	24.9823	upregulated	4	3.19232	0.0411					upregulated	4	3.40305	0.0333					downregulated	15	10.0203	4.4e-05	downregulated	9	8.36655	0.0002
negative regulation of supramolecular fiber organization	GO	4 out of 7	24.9419	upregulated	13	4.27664	0.0139	upregulated	8	1.89533	0.1503	upregulated	6	1.79168	0.1667	downregulated	5	5.48423	0.0042	upregulated	23	11.0254	1.6e-05	downregulated	28	22.4625	1.8e-10
heart contraction	GO	5 out of 7	24.8689	upregulated	6	5.19365	0.0056	downregulated	5	7.89825	0.0004	upregulated	4	1.4987	0.2234	upregulated	2	3.05201	0.0473	downregulated	21	14.5656	4.7e-07	downregulated	13	8.45719	0.0002
adult locomotory behavior	GO	2 out of 7	24.8081	upregulated	5	3.12261	0.044					downregulated	6	3.74951	0.0235	downregulated	7	7.54461	0.0005	downregulated	26	22.018	2.7e-10	downregulated	16	14.0843	7.6e-07
methyltransferase activity	GO	6 out of 7	24.7907	upregulated	15	2.50005	0.0821	upregulated	18	9.94636	4.8e-05	upregulated	7	3.74503	0.0236	upregulated	3	6.71306	0.0012	downregulated	34	0.996943	0.369	downregulated	14	2.20722	0.11	upregulated	1	1.31792	0.2677
protein serine/threonine phosphatase complex	GO	5 out of 7	24.7523	upregulated	7	4.50414	0.0111	upregulated	5	2.89814	0.0551	upregulated	1	0.277002	0.7581	downregulated	3	1.2217	0.2947	downregulated	18	12.291	4.6e-06	downregulated	8	6.00373	0.0025
positive regulation of cation channel activity	GO	3 out of 7	24.4701	upregulated	4	5.48135	0.0042					downregulated	2	1.78642	0.1676	downregulated	2	3.55951	0.0285	downregulated	23	17.7424	2e-08	downregulated	11	6.59231	0.0014
actin binding	GO	1 out of 7	24.2677	downregulated	11	6.43814	0.0016	downregulated	9	2.93246	0.0533	downregulated	49	15.1364	2.7e-07	downregulated	22	7.66628	0.0005	upregulated	80	38.2016	2.6e-17	downregulated	58	24.2677	2.9e-11
neurotransmitter receptor transport to postsynaptic membrane	GO	3 out of 7	24.261	upregulated	3	4.54044	0.0107	downregulated	2	4.3893	0.0124									downregulated	7	14.9602	3.2e-07	downregulated	3	9.14963	0.0001
organelle fusion	GO	5 out of 7	24.2533	upregulated	8	2.27899	0.1024	upregulated	8	5.45541	0.0043	upregulated	1	0.63616	0.5293	downregulated	5	1.39801	0.2471	downregulated	25	11.1932	1.4e-05	downregulated	9	6.08762	0.0023
pallium development	GO	3 out of 7	24.2495	downregulated	2	0.500002	0.6065	upregulated	7	5.35066	0.0047	downregulated	11	3.54847	0.0288	downregulated	8	3.04886	0.0474	downregulated	42	17.8054	1.9e-08	downregulated	22	9.32745	8.9e-05	upregulated	1	1.13669	0.3209
cerebellum development	GO	4 out of 7	24.2256	upregulated	4	2.36793	0.0937	upregulated	5	2.56118	0.0772	downregulated	8	3.5035	0.0301	downregulated	2	0.354396	0.7016	downregulated	24	11.4756	1e-05	downregulated	17	11.6788	8.5e-06
positive regulation of calcium ion transmembrane transporter activity	GO	3 out of 7	24.1982	upregulated	5	8.38666	0.0002	downregulated	1	3.55172	0.0287	downregulated	2	2.35086	0.0953	downregulated	1	0.69787	0.4976	downregulated	15	13.3838	1.5e-06	downregulated	10	9.02819	0.0001
sleep	GO	4 out of 7	24.1626	upregulated	1	3.98922	0.0185					upregulated	3	6.27902	0.0019					downregulated	5	6.57705	0.0014	downregulated	4	7.31726	0.0007
regulation of GTP binding	GO	5 out of 7	23.9414	upregulated	4	5.06529	0.0063	upregulated	1	3.51381	0.0298	upregulated	1	1.04582	0.3514					downregulated	3	4.73988	0.0087	downregulated	4	9.57659	6.9e-05
modified amino acid binding	GO	5 out of 7	23.8468	upregulated	3	1.15652	0.3146	upregulated	3	6.30373	0.0018	upregulated	3	1.00775	0.365	downregulated	3	5.89371	0.0028	downregulated	15	10.7843	2.1e-05	downregulated	11	10.4882	2.8e-05
apical dendrite	GO	4 out of 7	23.815	upregulated	1	1.58316	0.2053					downregulated	1	1.88353	0.1521	upregulated	1	4.31976	0.0133	downregulated	7	7.47612	0.0006	downregulated	7	12.3195	4.5e-06
cell-cell adhesion via plasma-membrane adhesion molecules	GO	3 out of 7	23.7201	upregulated	13	8.37044	0.0002	downregulated	5	1.17288	0.3095	downregulated	16	8.48411	0.0002	downregulated	7	5.20656	0.0055	downregulated	47	19.2889	4.2e-09	downregulated	30	13.172	1.9e-06	upregulated	1	2.24766	0.1056
pigmentation	GO	6 out of 7	23.708	upregulated	6	5.51577	0.004	upregulated	2	1.86349	0.1551	upregulated	5	2.34505	0.0958	upregulated	1	0.858337	0.4239	downregulated	21	8.78152	0.0002	downregulated	12	5.95763	0.0026	upregulated	1	1.61383	0.1991
nerve development	GO	3 out of 7	23.5981	downregulated	2	2.06666	0.1266	upregulated	2	0.751196	0.4718	downregulated	5	3.87937	0.0207	downregulated	1	0.0623672	0.9395	downregulated	19	13.5221	1.3e-06	downregulated	12	15.3332	2.2e-07
electron transfer activity	GO	4 out of 7	23.5726	downregulated	2	3.06658	0.0466	upregulated	8	5.70725	0.0033	upregulated	5	4.90936	0.0074	downregulated	4	2.77969	0.0621	downregulated	26	11.2222	1.3e-05	downregulated	12	4.80041	0.0082
metencephalon development	GO	4 out of 7	23.5627	upregulated	4	2.29332	0.1009	upregulated	5	2.29257	0.101	downregulated	8	3.25999	0.0384	downregulated	2	0.298959	0.7416	downregulated	25	12.0228	6e-06	downregulated	17	10.513	2.7e-05
clathrin coat	GO	3 out of 7	23.5486	downregulated	3	3.02576	0.0485	downregulated	3	2.3543	0.095	downregulated	5	2.84116	0.0584	upregulated	1	2.42533	0.0884	downregulated	20	16.7654	5.2e-08	downregulated	13	12.5791	3.4e-06
neurotransmitter receptor transport	GO	3 out of 7	23.5314	upregulated	3	2.73177	0.0651	downregulated	2	3.09205	0.0454	downregulated	2	3.00968	0.0493					downregulated	11	16.5433	6.5e-08	downregulated	5	10.358	3.2e-05
dendrite extension	GO	4 out of 7	23.2874					upregulated	1	1.47968	0.2277	upregulated	1	2.01647	0.1331	upregulated	1	3.11189	0.0445	downregulated	5	6.54412	0.0014	downregulated	5	12.1517	5.3e-06
reproductive behavior	GO	5 out of 7	23.2688					upregulated	1	0.89811	0.4073	upregulated	3	3.86923	0.0209	upregulated	2	4.58858	0.0102	downregulated	10	8.61962	0.0002	downregulated	4	5.29325	0.005
establishment of protein localization to postsynaptic membrane	GO	3 out of 7	23.248	upregulated	3	4.42681	0.012	downregulated	2	4.31055	0.0134									downregulated	7	14.2933	6.2e-07	downregulated	3	8.83846	0.0001
transmission of nerve impulse	GO	3 out of 7	23.2323	upregulated	2	1.82362	0.1614					downregulated	4	2.77569	0.0623	downregulated	3	3.61382	0.0269	downregulated	21	20.8519	8.8e-10	downregulated	8	6.94625	0.001
regulation of blood vessel size	GO	4 out of 7	23.2312	upregulated	6	4.52182	0.0109	upregulated	6	3.93132	0.0196	upregulated	10	7.57943	0.0005	downregulated	6	3.42797	0.0325	downregulated	17	6.6051	0.0014	downregulated	13	8.5433	0.0002
ubiquitin conjugating enzyme activity	GO	5 out of 7	23.1996	upregulated	6	3.088	0.0456	upregulated	3	2.24593	0.1058	upregulated	2	1.40601	0.2451	downregulated	2	0.639568	0.5275	downregulated	16	8.0035	0.0003	downregulated	9	9.09568	0.0001
mitochondrial transmembrane transport	GO	3 out of 7	23.1061	upregulated	2	0.45452	0.6348	downregulated	2	1.30171	0.2721	downregulated	2	0.687201	0.503	downregulated	1	0.739342	0.4774	downregulated	28	20.7273	1e-09	downregulated	10	4.65253	0.0095
regulation of tube size	GO	4 out of 7	23.0961	upregulated	6	4.50891	0.011	upregulated	6	3.91725	0.0199	upregulated	10	7.56478	0.0005	downregulated	6	3.40432	0.0332	downregulated	17	6.54819	0.0014	downregulated	13	8.47019	0.0002
clathrin-dependent endocytosis	GO	2 out of 7	23.0577	downregulated	1	2.01041	0.1339	downregulated	1	1.19915	0.3015	downregulated	2	4.33736	0.0131					downregulated	15	19.7712	2.6e-09	downregulated	8	10.8334	2e-05
filopodium	GO	3 out of 7	22.9741	downregulated	3	4.70016	0.0091	downregulated	2	2.86329	0.0571	downregulated	8	1.21231	0.2975	upregulated	1	3.08964	0.0455	downregulated	28	16.9784	4.2e-08	downregulated	18	11.6817	8.4e-06
regulation of protein localization to membrane	GO	3 out of 7	22.9525	upregulated	10	2.18144	0.1129	downregulated	5	1.50327	0.2224	upregulated	7	3.01459	0.0491	downregulated	7	2.66584	0.0695	downregulated	41	12.8059	2.7e-06	downregulated	30	21.9256	3e-10
regulation of sensory perception of pain	GO	5 out of 7	22.9521	upregulated	1	3.45688	0.0315	upregulated	1	3.08749	0.0456	upregulated	2	4.9517	0.0071	downregulated	2	1.73135	0.177	downregulated	10	6.826	0.0011	downregulated	7	6.36142	0.0017
L-alpha-amino acid transmembrane transport	GO	5 out of 7	22.9428	upregulated	2	2.31507	0.0988	upregulated	2	3.82459	0.0218	upregulated	3	6.23501	0.002	downregulated	4	2.90011	0.055	downregulated	12	7.36686	0.0006	downregulated	8	6.10135	0.0022
vasoconstriction	GO	4 out of 7	22.8768	upregulated	1	3.2221	0.0399	upregulated	2	6.15293	0.0021	downregulated	1	0.31995	0.7262					downregulated	6	5.62312	0.0036	downregulated	5	8.19862	0.0003
mitochondrial respiratory chain	GO	1 out of 7	22.869	upregulated	5	1.93906	0.1438	upregulated	3	1.19407	0.303	upregulated	1	0.759201	0.468	downregulated	1	0.339459	0.7122	downregulated	37	35.6442	3.3e-16	downregulated	22	22.869	1.2e-10
sarcoplasm	GO	5 out of 7	22.7715	upregulated	3	2.35293	0.0951	downregulated	1	2.63407	0.0718	upregulated	5	2.66585	0.0695	upregulated	1	2.41741	0.0892	downregulated	22	13.9971	8.3e-07	downregulated	9	3.97224	0.0188
G-protein coupled serotonin receptor signaling pathway	GO	4 out of 7	22.7711	upregulated	1	3.75677	0.0234	downregulated	1	2.93877	0.0529	upregulated	2	5.54917	0.0039					downregulated	6	7.81901	0.0004	downregulated	6	8.58491	0.0002
cerebral cortex development	GO	4 out of 7	22.6737	upregulated	3	0.839943	0.4317	upregulated	6	6.1683	0.0021	downregulated	8	3.97101	0.0189	downregulated	6	3.75367	0.0234	downregulated	31	16.51	6.8e-08	downregulated	16	8.34791	0.0002	upregulated	1	1.46783	0.2304
phosphatase inhibitor activity	GO	5 out of 7	22.5895	upregulated	3	3.27475	0.0378	upregulated	2	3.02942	0.0483	upregulated	1	1.66864	0.1885					downregulated	13	8.78886	0.0002	downregulated	7	5.82785	0.0029
locomotory exploration behavior	GO	4 out of 7	22.4824	upregulated	1	2.96771	0.0514	upregulated	1	1.10056	0.3327									downregulated	6	11.5575	9.6e-06	downregulated	4	6.85668	0.0011
protein transport along microtubule	GO	3 out of 7	22.4543	upregulated	1	4.25155	0.0142	downregulated	1	1.82497	0.1612									downregulated	5	7.29558	0.0007	downregulated	6	12.7321	3e-06
positive regulation of regulated secretory pathway	GO	3 out of 7	22.3165	downregulated	1	0.54378	0.5805	upregulated	2	1.68469	0.1855	downregulated	5	5.97738	0.0025	downregulated	4	7.75316	0.0004	downregulated	18	16.6993	5.6e-08	downregulated	12	18.2069	1.2e-08
translation repressor activity	GO	5 out of 7	22.275					upregulated	1	5.52658	0.004	upregulated	5	5.79315	0.003	upregulated	1	3.64445	0.0261	downregulated	5	5.02372	0.0066	downregulated	2	2.28709	0.1016
carbon-carbon lyase activity	GO	5 out of 7	22.2588	downregulated	2	5.39573	0.0045	upregulated	5	4.54442	0.0106	upregulated	6	8.10814	0.0003	upregulated	3	8.03238	0.0003	downregulated	13	6.1687	0.0021	downregulated	2	0.8009	0.4489
protein-DNA complex assembly	GO	5 out of 7	22.1931	upregulated	18	7.79699	0.0004	upregulated	17	10.9371	1.8e-05	downregulated	11	0.997247	0.3689	upregulated	3	2.94951	0.0524	downregulated	29	1.16068	0.3133	downregulated	9	0.346027	0.7075
ubiquitin-like protein ligase binding	GO	4 out of 7	22.1321	upregulated	19	1.379	0.2518	upregulated	17	2.43887	0.0873	downregulated	21	3.34587	0.0352	downregulated	15	2.47008	0.0846	downregulated	71	18.8673	6.4e-09	downregulated	28	5.2629	0.0052
carboxy-lyase activity	GO	5 out of 7	22.0593	downregulated	2	5.84615	0.0029	upregulated	3	3.12493	0.0439	upregulated	5	8.14633	0.0003	upregulated	2	8.26854	0.0003	downregulated	10	7.03283	0.0009	downregulated	2	1.33277	0.2637
positive regulation of blood circulation	GO	5 out of 7	21.9466	upregulated	1	2.48568	0.0833	upregulated	2	4.49446	0.0112	upregulated	4	3.30537	0.0367	downregulated	4	2.24137	0.1063	downregulated	12	5.4317	0.0044	downregulated	8	8.47072	0.0002
canonical glycolysis	GO	2 out of 7	21.9104					downregulated	1	2.13072	0.1188					downregulated	1	0.965889	0.3806	downregulated	11	12.0473	5.9e-06	downregulated	9	12.9598	2.4e-06
phosphatase regulator activity	GO	4 out of 7	21.8993	upregulated	8	4.57581	0.0103	upregulated	5	4.13209	0.016	downregulated	5	1.18401	0.3061	downregulated	6	3.91193	0.02	downregulated	28	9.98074	4.6e-05	downregulated	15	8.30656	0.0002
negative regulation of response to drug	GO	4 out of 7	21.7181	upregulated	3	2.22185	0.1084	upregulated	2	4.4119	0.0121	downregulated	5	4.96776	0.007	downregulated	1	2.13228	0.1186	downregulated	9	9.29119	9.2e-05	downregulated	4	12.8932	2.5e-06
negative regulation of potassium ion transmembrane transport	GO	6 out of 7	21.7004	upregulated	1	0.813871	0.4431	upregulated	1	2.92803	0.0535	upregulated	1	1.2053	0.2996	upregulated	1	3.0751	0.0462	downregulated	8	7.46831	0.0006	downregulated	5	6.2098	0.002
regulation of AMPA receptor activity	GO	4 out of 7	21.6176	upregulated	2	3.88435	0.0206	downregulated	2	3.22913	0.0396	upregulated	1	1.16088	0.3132					downregulated	11	15.3492	2.2e-07	downregulated	4	4.45233	0.0117
regulation of synaptic vesicle endocytosis	GO	3 out of 7	21.523	upregulated	1	1.01977	0.3607													downregulated	8	12.2071	5e-06	downregulated	5	8.29617	0.0002
protein phosphatase regulator activity	GO	4 out of 7	21.5104	upregulated	7	3.66187	0.0257	upregulated	3	1.56549	0.209	downregulated	4	1.08085	0.3393	downregulated	5	3.749	0.0235	downregulated	25	12.2649	4.7e-06	downregulated	14	8.84795	0.0001
calcium-dependent protein binding	GO	2 out of 7	21.4022	downregulated	1	0.709599	0.4918	downregulated	1	0.520566	0.5942	downregulated	5	2.80547	0.0605	downregulated	3	1.88824	0.1513	downregulated	16	13.0981	2e-06	downregulated	14	14.228	6.6e-07
positive regulation of calcium ion transmembrane transport	GO	3 out of 7	21.3134	upregulated	6	7.53483	0.0005	downregulated	1	2.93401	0.0532	downregulated	4	4.25308	0.0142	downregulated	1	0.414743	0.6605	downregulated	20	11.8556	7.1e-06	downregulated	13	9.52483	7.3e-05
glycolytic process through glucose-6-phosphate	GO	2 out of 7	21.1521					downregulated	1	2.10047	0.1224					downregulated	1	0.940833	0.3903	downregulated	11	11.6308	8.9e-06	downregulated	9	12.5626	3.5e-06
glycolytic process through fructose-6-phosphate	GO	2 out of 7	21.1521					downregulated	1	2.10047	0.1224					downregulated	1	0.940833	0.3903	downregulated	11	11.6308	8.9e-06	downregulated	9	12.5626	3.5e-06
hindbrain development	GO	4 out of 7	21.0069	upregulated	5	1.98689	0.1371	upregulated	6	2.30547	0.0997	downregulated	8	2.31406	0.0989	downregulated	3	0.37508	0.6872	downregulated	32	13.0275	2.2e-06	downregulated	19	8.72484	0.0002	upregulated	1	2.34866	0.0955
positive regulation of protein depolymerization	GO	6 out of 7	21.0019	upregulated	1	1.13166	0.3225	upregulated	1	2.26145	0.1042	upregulated	2	2.24949	0.1055	upregulated	1	1.7117	0.1806	downregulated	8	9.51601	7.4e-05	downregulated	4	4.1316	0.0161
inorganic cation import across plasma membrane	GO	5 out of 7	20.7847	upregulated	3	2.49402	0.0826					upregulated	2	0.853365	0.426	upregulated	2	4.55557	0.0105	downregulated	14	7.32227	0.0007	downregulated	8	5.55952	0.0039
cyclic purine nucleotide metabolic process	GO	5 out of 7	20.7582	upregulated	2	5.93689	0.0026					upregulated	2	2.67888	0.0686	upregulated	2	4.72203	0.0089	downregulated	3	2.11644	0.1205	downregulated	5	5.30397	0.005
ribonuclease P complex	GO	4 out of 7	20.7445	upregulated	1	1.56871	0.2083					upregulated	2	4.35173	0.0129	downregulated	1	1.27449	0.2796	downregulated	6	8.48577	0.0002	downregulated	5	7.61282	0.0005
regulation of ubiquitin-dependent protein catabolic process	GO	5 out of 7	20.7424	upregulated	12	2.36606	0.0939	upregulated	6	1.60098	0.2017	downregulated	12	2.40449	0.0903	upregulated	2	1.71872	0.1793	downregulated	40	14.0051	8.3e-07	downregulated	14	3.456	0.0316
molecular adaptor activity	GO	4 out of 7	20.6877	downregulated	7	1.33395	0.2634	upregulated	8	4.11799	0.0163	downregulated	13	2.65806	0.0701	upregulated	2	1.18463	0.3059	downregulated	33	6.53948	0.0014	downregulated	28	12.8376	2.7e-06
proton-transporting ATP synthase complex	GO	5 out of 7	20.6762	upregulated	1	1.95504	0.1416	upregulated	1	2.96451	0.0516	upregulated	1	2.90512	0.0547					downregulated	6	10.1955	3.7e-05	downregulated	2	2.65604	0.0702
excitatory synapse assembly	GO	5 out of 7	20.6477	upregulated	2	4.17215	0.0154					upregulated	1	1.57698	0.2066	upregulated	1	3.49785	0.0303	downregulated	6	7.22311	0.0007	downregulated	3	4.17761	0.0153
negative regulation of potassium ion transmembrane transporter activity	GO	6 out of 7	20.6163	upregulated	1	0.983674	0.3739	upregulated	1	3.14583	0.043	upregulated	1	1.39483	0.2479	upregulated	1	3.29365	0.0371	downregulated	6	7.26315	0.0007	downregulated	4	4.53518	0.0107
extrinsic component of plasma membrane	GO	4 out of 7	20.4133	upregulated	7	5.96557	0.0026	upregulated	4	4.96349	0.007	downregulated	10	4.89048	0.0075	downregulated	12	5.36083	0.0047	downregulated	28	13.6614	1.2e-06	downregulated	15	6.07416	0.0023
cell-cell adhesion mediated by cadherin	GO	4 out of 7	20.2881	upregulated	2	3.35486	0.0349					upregulated	1	4.82471	0.008					downregulated	7	8.40973	0.0002	downregulated	4	3.6988	0.0248
peptide biosynthetic process	GO	6 out of 7	20.2411	upregulated	15	0.191373	0.8258	upregulated	18	4.95421	0.0071	upregulated	14	1.57218	0.2076	upregulated	5	1.38466	0.2504	downregulated	85	9.51667	7.4e-05	downregulated	36	3.91151	0.02	upregulated	1	1.28951	0.2754
scaffold protein binding	GO	6 out of 7	20.2029	upregulated	3	1.31455	0.2686	upregulated	2	2.05214	0.1285	upregulated	6	4.91462	0.0073	upregulated	2	2.08686	0.1241	downregulated	17	6.77305	0.0011	downregulated	6	3.06171	0.0468
regulation of circadian rhythm	GO	5 out of 7	20.097	upregulated	8	2.57484	0.0762	upregulated	5	1.56415	0.2093	upregulated	3	1.69891	0.1829	downregulated	5	1.38917	0.2493	downregulated	23	7.20846	0.0007	downregulated	14	8.43979	0.0002
endosomal transport	GO	5 out of 7	20.0828	upregulated	13	3.12298	0.044	upregulated	8	1.36883	0.2544	upregulated	10	4.98914	0.0068	downregulated	14	4.28182	0.0138	downregulated	46	11.0335	1.6e-05	downregulated	15	2.20848	0.1099	upregulated	1	2.64009	0.0714
ubiquitin-protein transferase activity	GO	1 out of 7	20.0481	upregulated	46	18.4631	9.6e-09	upregulated	29	7.77947	0.0004	downregulated	27	1.6517	0.1917	downregulated	16	1.03021	0.3569	downregulated	95	18.9214	6.1e-09	downregulated	52	20.0481	2e-09	upregulated	1	0.492155	0.6113
microtubule	GO	1 out of 7	19.9899	upregulated	22	1.39693	0.2474	upregulated	13	1.44119	0.2366	downregulated	45	11.3016	1.2e-05	downregulated	27	6.95558	0.001	downregulated	114	37.6548	4.4e-17	downregulated	58	21.3328	5.4e-10	upregulated	2	1.34295	0.2611
mannosylation	GO	5 out of 7	19.7853	upregulated	2	1.64356	0.1933	upregulated	2	2.38476	0.0921	upregulated	3	8.3758	0.0002					downregulated	9	4.99344	0.0068	downregulated	3	2.38771	0.0918
negative regulation of calcium ion transmembrane transporter activity	GO	6 out of 7	19.748	upregulated	2	1.60355	0.2012	upregulated	2	1.77467	0.1695	upregulated	2	1.56472	0.2091	upregulated	1	1.83496	0.1596	downregulated	12	11.0733	1.6e-05	downregulated	4	1.8968	0.15
blood circulation	GO	3 out of 7	19.7301	upregulated	15	10.8291	2e-05	downregulated	7	3.35172	0.035	upregulated	18	5.76186	0.0031	downregulated	11	3.63939	0.0263	downregulated	56	16.3527	7.9e-08	downregulated	33	10.1303	4e-05
phospholipid binding	GO	1 out of 7	19.6894	downregulated	11	2.53751	0.0791	upregulated	7	0.944358	0.3889	downregulated	41	15.4656	1.9e-07	downregulated	25	8.02771	0.0003	downregulated	73	15.2791	2.3e-07	downregulated	54	21.7652	3.5e-10	upregulated	2	2.07579	0.1255
sulfotransferase activity	GO	5 out of 7	19.5344	upregulated	2	2.29715	0.1005					upregulated	3	5.61906	0.0036	upregulated	1	1.25697	0.2845	downregulated	7	3.06112	0.0468	downregulated	4	7.30008	0.0007
dendrite morphogenesis	GO	4 out of 7	19.4778	downregulated	4	5.1353	0.0059	downregulated	3	3.29602	0.037	upregulated	4	1.93787	0.144	upregulated	2	3.03526	0.0481	downregulated	20	15.7279	1.5e-07	downregulated	10	7.20814	0.0007
calcium-dependent cell-cell adhesion via plasma membrane cell adhesion molecules	GO	5 out of 7	19.3205	upregulated	4	4.13147	0.0161	upregulated	1	2.05927	0.1275	upregulated	2	4.30188	0.0135					downregulated	9	6.15702	0.0021	downregulated	3	2.67085	0.0692
response to light stimulus	GO	5 out of 7	19.2928	upregulated	9	0.64831	0.5229	upregulated	17	6.65788	0.0013	upregulated	7	4.64612	0.0096	downregulated	14	2.96401	0.0516	downregulated	49	5.19773	0.0055	downregulated	27	5.10674	0.0061
carbohydrate biosynthetic process	GO	3 out of 7	19.2829	downregulated	1	4.63381	0.0097	downregulated	3	1.23546	0.2907	upregulated	6	3.84356	0.0214	downregulated	7	3.57714	0.028	downregulated	27	12.2641	4.7e-06	downregulated	18	12.6216	3.3e-06
pyridoxal phosphate binding	GO	6 out of 7	19.2805	upregulated	2	1.82344	0.1615	upregulated	2	2.36621	0.0938	upregulated	5	4.83151	0.008	upregulated	2	3.09774	0.0452	downregulated	11	5.69257	0.0034	downregulated	4	1.46904	0.2301
regulation of clathrin-dependent endocytosis	GO	3 out of 7	19.1627	upregulated	4	4.7521	0.0086	downregulated	1	1.21565	0.2965	downregulated	2	2.14364	0.1172	downregulated	1	0.697952	0.4976	downregulated	10	10.4425	2.9e-05	downregulated	6	8.02537	0.0003
regulation of G-protein coupled receptor protein signaling pathway	GO	4 out of 7	19.1506	downregulated	3	2.82665	0.0592	upregulated	3	2.91337	0.0543	downregulated	8	3.50704	0.03	downregulated	8	4.81278	0.0081	downregulated	30	12.3295	4.4e-06	downregulated	21	10.674	2.3e-05	downregulated	1	4.38029	0.0125
outer membrane	GO	3 out of 7	19.1122	downregulated	4	0.869971	0.419	upregulated	9	2.92429	0.0537	downregulated	16	7.99076	0.0003	downregulated	10	4.35028	0.0129	downregulated	49	18.7988	6.9e-09	downregulated	27	10.6002	2.5e-05
vesicle cytoskeletal trafficking	GO	3 out of 7	19.1018	downregulated	2	3.08329	0.0458	upregulated	1	0.292535	0.7464	downregulated	3	1.6513	0.1918	downregulated	1	1.60629	0.2006	downregulated	18	11.4148	1.1e-05	downregulated	13	13.7353	1.1e-06
regulation of release of sequestered calcium ion into cytosol	GO	2 out of 7	19.0747	downregulated	2	1.32588	0.2656	downregulated	1	2.70311	0.067	downregulated	4	1.99785	0.1356	downregulated	2	0.925877	0.3962	downregulated	26	18.7107	7.5e-09	downregulated	12	7.3167	0.0007
circadian rhythm	GO	5 out of 7	19.0533	upregulated	8	2.25304	0.1051	upregulated	8	4.68925	0.0092	upregulated	7	3.52738	0.0294	upregulated	4	3.9217	0.0198	upregulated	17	4.29322	0.0137	downregulated	15	4.66195	0.0094
ribosome binding	GO	6 out of 7	19.0036	upregulated	1	0.0872456	0.9165	upregulated	3	2.36272	0.0942	upregulated	7	9.74077	5.9e-05	upregulated	2	3.34655	0.0352	downregulated	7	1.18967	0.3043	downregulated	3	2.27667	0.1026
circadian behavior	GO	5 out of 7	18.7835	upregulated	2	3.95866	0.0191					upregulated	2	3.26789	0.0381	upregulated	2	6.02297	0.0024	downregulated	6	4.1047	0.0165	downregulated	2	1.42924	0.2395
hormone secretion	GO	4 out of 7	18.7714	downregulated	2	1.15756	0.3143	upregulated	1	0.161799	0.8506	upregulated	3	2.3305	0.0972	downregulated	2	1.67073	0.1881	downregulated	20	10.3787	3.1e-05	downregulated	9	8.72867	0.0002
visual behavior	GO	3 out of 7	18.7417	upregulated	2	1.61449	0.199	downregulated	2	1.5878	0.2044	upregulated	3	7.18226	0.0008					downregulated	14	9.85014	5.3e-05	downregulated	12	11.5327	9.8e-06
regulation of cell size	GO	4 out of 7	18.5475	upregulated	8	2.34804	0.0956	upregulated	6	0.934858	0.3926	downregulated	17	6.86542	0.001	downregulated	12	4.55115	0.0106	downregulated	42	12.9275	2.4e-06	downregulated	27	13.7537	1.1e-06
amine binding	GO	3 out of 7	18.3837	upregulated	1	4.62313	0.0098													downregulated	4	4.6607	0.0095	downregulated	3	9.09985	0.0001
COP9 signalosome	GO	4 out of 7	18.3725	upregulated	3	2.71138	0.0664					upregulated	3	5.99014	0.0025	downregulated	1	1.00235	0.367	downregulated	10	5.57614	0.0038	downregulated	7	5.09724	0.0061
regulation of sequestering of calcium ion	GO	3 out of 7	18.3276	upregulated	5	1.93546	0.1444	downregulated	2	2.96665	0.0515	downregulated	8	4.31139	0.0134	downregulated	4	1.46449	0.2312	downregulated	33	18.6434	8e-09	downregulated	15	6.4913	0.0015
eating behavior	GO	6 out of 7	18.3067	upregulated	2	3.56741	0.0282	upregulated	1	1.0631	0.3454	upregulated	2	2.75885	0.0634	upregulated	1	1.694	0.1838	downregulated	8	7.16034	0.0008	downregulated	3	2.06301	0.1271
organelle outer membrane	GO	3 out of 7	18.2907	downregulated	4	0.886853	0.4119	upregulated	8	2.93377	0.0532	downregulated	16	8.0619	0.0003	downregulated	10	4.41283	0.0121	downregulated	48	17.9394	1.6e-08	downregulated	27	10.7791	2.1e-05
cellular lipid catabolic process	GO	4 out of 7	18.1877	downregulated	3	4.33484	0.0131	upregulated	13	7.94099	0.0004	upregulated	11	8.12444	0.0003	downregulated	8	2.24311	0.1061	downregulated	32	4.988	0.0068	downregulated	15	3.71223	0.0244
postsynapse assembly	GO	5 out of 7	18.1279	upregulated	2	3.50215	0.0301					upregulated	2	3.37644	0.0342	upregulated	1	3.27342	0.0379	downregulated	6	5.09372	0.0061	downregulated	3	2.88218	0.056
proton-transporting two-sector ATPase complex, proton-transporting domain	GO	5 out of 7	17.9874	upregulated	1	1.78753	0.1674	upregulated	1	2.68548	0.0682	upregulated	1	2.72833	0.0653					downregulated	5	6.53853	0.0014	downregulated	3	4.2475	0.0143
ganglion development	GO	3 out of 7	17.9632	upregulated	2	5.87019	0.0028													downregulated	3	5.47799	0.0042	downregulated	2	6.61504	0.0013
translation regulator activity	GO	6 out of 7	17.9264	upregulated	2	0.543978	0.5804	upregulated	3	4.71765	0.0089	upregulated	6	4.64257	0.0096	upregulated	2	3.0476	0.0475	downregulated	9	2.93221	0.0533	downregulated	3	2.04241	0.1297
response to ethanol	GO	4 out of 7	17.8662	upregulated	1	0.399669	0.6705	upregulated	4	3.8518	0.0212	downregulated	8	5.15229	0.0058	downregulated	5	2.18168	0.1129	downregulated	27	10.0162	4.5e-05	downregulated	16	10.9325	1.8e-05
positive regulation of ubiquitin-dependent protein catabolic process	GO	5 out of 7	17.8177	upregulated	7	2.15602	0.1158	upregulated	5	2.97356	0.0511	downregulated	10	5.23299	0.0053	upregulated	1	1.68774	0.1849	downregulated	24	10.3546	3.2e-05	downregulated	13	5.87883	0.0028
cyclase activity	GO	5 out of 7	17.7622	upregulated	2	6.0257	0.0024					upregulated	1	2.049	0.1289	upregulated	1	1.91913	0.1467	downregulated	5	3.96736	0.0189	downregulated	4	3.80099	0.0223
positive regulation of renal sodium excretion	GO	4 out of 7	17.7579					upregulated	1	4.02911	0.0178	upregulated	3	4.90902	0.0074	upregulated	2	6.01302	0.0024	downregulated	1	6.14655	0.0021	upregulated	1	3.33978	0.0354
neuropeptide receptor activity	GO	4 out of 7	17.6533	upregulated	2	5.25447	0.0052					upregulated	2	2.01249	0.1337					downregulated	11	7.69898	0.0005	downregulated	5	2.68738	0.0681
ubiquitin-like protein ligase activity	GO	4 out of 7	17.5572	upregulated	18	2.60675	0.0738	upregulated	16	4.76766	0.0085	downregulated	19	2.78729	0.0616	downregulated	12	2.36104	0.0943	downregulated	50	9.83775	5.3e-05	downregulated	22	6.39436	0.0017	upregulated	1	0.90103	0.4062
pigment biosynthetic process	GO	5 out of 7	17.5523	upregulated	3	1.24954	0.2866	upregulated	6	6.74318	0.0012	upregulated	6	5.90334	0.0027	upregulated	2	3.34255	0.0353	downregulated	10	3.2931	0.0371	upregulated	1	2.97941	0.0508
transcription factor activity, RNA polymerase II core promoter sequence-specific DNA binding	GO	6 out of 7	17.4639	upregulated	4	4.53744	0.0107	upregulated	1	3.46996	0.0311	upregulated	1	1.43399	0.2384	upregulated	1	4.73175	0.0088	downregulated	5	2.30695	0.0996	downregulated	2	0.98378	0.3739
negative regulation of calcium ion transmembrane transport	GO	6 out of 7	17.4604	upregulated	2	1.42897	0.2396	upregulated	2	1.57652	0.2067	upregulated	2	1.37531	0.2528	upregulated	1	1.71624	0.1797	downregulated	12	9.71321	6e-05	downregulated	4	1.65015	0.192
nucleoside binding	GO	1 out of 7	17.4547	upregulated	21	6.50561	0.0015	upregulated	17	2.39135	0.0915	upregulated	18	5.45527	0.0043	upregulated	2	1.83892	0.159	downregulated	95	39.7061	5.7e-18	downregulated	49	17.4547	2.6e-08	upregulated	3	3.5372	0.0291
calcium-dependent phospholipid binding	GO	1 out of 7	17.3165	downregulated	1	0.537544	0.5842					upregulated	1	0.437089	0.6459	downregulated	2	0.765376	0.4652	downregulated	15	17.8286	1.8e-08	downregulated	11	17.3165	3e-08
regulation of protein targeting	GO	3 out of 7	17.3129	upregulated	7	4.22215	0.0147	downregulated	2	2.04984	0.1288	downregulated	5	2.16401	0.1149	downregulated	4	3.13056	0.0437	downregulated	21	10.2671	3.5e-05	downregulated	15	10.168	3.8e-05
neurotransmitter receptor internalization	GO	2 out of 7	17.2972									downregulated	3	3.65064	0.026	downregulated	2	3.14934	0.0429	downregulated	7	14.2162	6.7e-07	downregulated	4	9.88101	5.1e-05
protein secretion	GO	4 out of 7	17.2928	upregulated	5	2.26242	0.1041	upregulated	2	1.76152	0.1718	upregulated	5	1.84971	0.1573	downregulated	7	3.53052	0.0293	downregulated	32	11.1246	1.5e-05	downregulated	18	10.6669	2.3e-05	upregulated	2	4.99212	0.0068
response to radiation	GO	4 out of 7	17.2904	upregulated	17	0.402282	0.6688	upregulated	31	13.3157	1.6e-06	upregulated	15	4.32759	0.0132	downregulated	21	4.37697	0.0126	upregulated	43	8.11983	0.0003	downregulated	36	4.915	0.0073	upregulated	2	1.29323	0.2744
regulation of heart contraction	GO	3 out of 7	17.2416	downregulated	3	1.68786	0.1849	upregulated	6	4.08454	0.0168	downregulated	13	1.26253	0.2829	upregulated	3	1.33202	0.2639	downregulated	58	30.3322	6.7e-14	downregulated	30	14.7754	3.8e-07
mitochondrial membrane organization	GO	3 out of 7	17.1867	downregulated	4	1.12314	0.3253	upregulated	4	0.833295	0.4346	upregulated	5	2.71964	0.0659	upregulated	1	1.24166	0.2889	downregulated	39	26.472	3.2e-12	downregulated	22	16.2349	8.9e-08
striated muscle contraction	GO	4 out of 7	17.1766	upregulated	6	6.01392	0.0024	downregulated	4	4.98287	0.0069	upregulated	5	1.79333	0.1664	upregulated	2	2.73042	0.0652	downregulated	26	17.3588	2.9e-08	downregulated	17	11.6218	9e-06
phosphoprotein phosphatase activity	GO	1 out of 7	17.1314	upregulated	17	3.2025	0.0407	upregulated	6	0.892983	0.4094	downregulated	20	4.15769	0.0156	upregulated	2	1.2374	0.2901	downregulated	51	17.5413	2.4e-08	downregulated	30	17.1314	3.6e-08
intraciliary transport involved in cilium assembly	GO	5 out of 7	17.1033	upregulated	1	1.84576	0.1579	upregulated	4	4.29401	0.0137	upregulated	2	4.11796	0.0163					downregulated	8	3.66129	0.0257	downregulated	5	3.1843	0.0414
diacylglycerol binding	GO	3 out of 7	17.0608	upregulated	2	5.5267	0.004					downregulated	1	1.66595	0.189					downregulated	3	7.62283	0.0005	downregulated	3	5.57725	0.0038
regulation of neuron migration	GO	3 out of 7	17.0488	upregulated	3	3.53828	0.0291					downregulated	4	2.75798	0.0634	downregulated	1	0.600528	0.5485	downregulated	9	8.62162	0.0002	downregulated	8	8.24738	0.0003
regulation of glutamate secretion	GO	4 out of 7	16.9393	upregulated	2	1.60561	0.2008					downregulated	1	2.83212	0.0589	upregulated	1	2.56047	0.0773	downregulated	6	10.2189	3.6e-05	downregulated	4	5.38653	0.0046
cell-cell signaling involved in cardiac conduction	GO	4 out of 7	16.863	upregulated	2	2.94574	0.0526	downregulated	2	4.1904	0.0151	upregulated	2	1.85187	0.1569	downregulated	1	1.95199	0.142	downregulated	9	10.2319	3.6e-05	downregulated	7	7.97581	0.0003
tricarboxylic acid cycle enzyme complex	GO	4 out of 7	16.7826	upregulated	1	0.892299	0.4097	upregulated	1	2.25153	0.1052									downregulated	6	6.36955	0.0017	downregulated	5	7.26922	0.0007
calcium ion transmembrane import into cytosol	GO	3 out of 7	16.7236	upregulated	3	2.53554	0.0792	downregulated	1	2.92749	0.0535	downregulated	4	2.6649	0.0696	downregulated	3	1.95362	0.1418	downregulated	18	14.3117	6.1e-07	downregulated	8	7.42232	0.0006
acetylcholine receptor signaling pathway	GO	3 out of 7	16.6061									upregulated	1	4.92959	0.0072	downregulated	1	3.83811	0.0215	downregulated	6	7.48689	0.0006	downregulated	6	8.02777	0.0003
response to acetylcholine	GO	3 out of 7	16.6061									upregulated	1	4.92959	0.0072	downregulated	1	3.83811	0.0215	downregulated	6	7.48689	0.0006	downregulated	6	8.02777	0.0003
mitochondrial respiratory chain complex I	GO	1 out of 7	16.6015	upregulated	3	1.59216	0.2035	downregulated	1	1.56139	0.2098									downregulated	24	27.2736	1.4e-12	downregulated	14	16.6015	6.2e-08
ubiquitin-like protein binding	GO	5 out of 7	16.5689	upregulated	7	1.16412	0.3122	upregulated	5	1.14372	0.3186	upregulated	4	2.75744	0.0635	downregulated	3	0.43197	0.6492	downregulated	18	4.6443	0.0096	downregulated	13	7.29127	0.0007
cilium organization	GO	5 out of 7	16.5684	upregulated	28	7.18773	0.0008	upregulated	25	10.4411	2.9e-05	upregulated	11	1.44366	0.2361	upregulated	3	0.707268	0.493	upregulated	52	7.71278	0.0004	downregulated	34	6.15016	0.0021	upregulated	2	1.6487	0.1923
negative regulation of cardiac muscle cell differentiation	GO	3 out of 7	16.5057	upregulated	1	1.80704	0.1641					downregulated	1	1.61973	0.198					downregulated	2	7.3973	0.0006	downregulated	3	8.92115	0.0001
phosphorus-oxygen lyase activity	GO	5 out of 7	16.4839	upregulated	2	6.11885	0.0022					upregulated	1	2.13224	0.1186	upregulated	1	2.00153	0.1351	downregulated	4	2.2692	0.1034	downregulated	4	3.96212	0.019
small nuclear ribonucleoprotein complex	GO	5 out of 7	16.4564	upregulated	2	2.03978	0.1301	upregulated	7	7.9803	0.0003	upregulated	2	2.61438	0.0732	upregulated	1	0.897079	0.4078	downregulated	12	3.59461	0.0275	upregulated	3	0.6697	0.5119
cell cycle G2/M phase transition	GO	4 out of 7	16.3492	upregulated	11	4.28665	0.0138	upregulated	10	7.30599	0.0007	downregulated	15	4.64393	0.0096	downregulated	8	4.0922	0.0167	downregulated	32	8.73852	0.0002	downregulated	15	4.7542	0.0086
neuropeptide receptor binding	GO	3 out of 7	16.3472	upregulated	1	3.8127	0.0221					upregulated	1	3.45643	0.0315					downregulated	11	13.2892	1.7e-06	upregulated	2	4.21122	0.0148
spliceosomal snRNP complex	GO	4 out of 7	16.3254	upregulated	2	2.14862	0.1166	upregulated	7	8.73728	0.0002	upregulated	2	2.82392	0.0594	downregulated	1	0.173156	0.841	downregulated	11	3.60463	0.0272	upregulated	3	0.815878	0.4423
response to alcohol	GO	3 out of 7	16.3071	downregulated	3	1.02307	0.3595	upregulated	6	3.28884	0.0373	downregulated	16	4.55192	0.0105	downregulated	12	5.31786	0.0049	downregulated	44	16.4001	7.5e-08	downregulated	22	8.53403	0.0002	upregulated	1	1.02307	0.3595
regulation of mRNA polyadenylation	GO	6 out of 7	16.2558	upregulated	1	1.24238	0.2887	upregulated	1	0.977616	0.3762	upregulated	3	5.9379	0.0026	upregulated	1	4.34315	0.013	downregulated	3	2.00338	0.1349	downregulated	2	1.75137	0.1735
negative regulation of cardiocyte differentiation	GO	3 out of 7	16.2302	upregulated	1	1.54306	0.2137					downregulated	1	1.36225	0.2561	downregulated	1	0.712673	0.4903	downregulated	3	8.32578	0.0002	downregulated	4	8.43633	0.0002
cell cortex region	GO	4 out of 7	16.226	upregulated	1	4.51823	0.0109	upregulated	1	0.614485	0.5409	downregulated	8	9.7303	5.9e-05	downregulated	5	4.33075	0.0132	downregulated	15	17.2956	3.1e-08	downregulated	7	7.8587	0.0004
developmental pigmentation	GO	6 out of 7	16.1187	upregulated	2	3.50095	0.0302	upregulated	2	2.61576	0.0731	upregulated	2	2.11602	0.1205	upregulated	1	1.51453	0.2199	downregulated	9	5.00226	0.0067	downregulated	3	1.36918	0.2543
atrial cardiac muscle cell action potential	GO	4 out of 7	16.1099	upregulated	1	2.71818	0.066					upregulated	1	1.12946	0.3232					downregulated	4	6.41568	0.0016	downregulated	4	5.84655	0.0029
transcription factor activity, RNA polymerase II core promoter sequence-specific binding involved in preinitiation complex assembly	GO	5 out of 7	16.0362	upregulated	2	2.1235	0.1196	upregulated	1	4.26175	0.0141					upregulated	1	5.52978	0.004	downregulated	4	1.88055	0.1525	downregulated	2	2.24063	0.1064
endoplasmic reticulum tubular network organization	GO	3 out of 7	16.0317	upregulated	3	5.1678	0.0057					downregulated	2	2.20018	0.1108	downregulated	1	1.16423	0.3122	downregulated	5	5.31691	0.0049	downregulated	4	8.9114	0.0001
protein kinase regulator activity	GO	4 out of 7	16.0266	upregulated	9	0.976568	0.3766	upregulated	6	2.23845	0.1066	upregulated	9	4.33181	0.0131	downregulated	7	3.81868	0.022	downregulated	38	4.58426	0.0102	downregulated	26	12.046	5.9e-06
ribonucleoprotein complex biogenesis	GO	6 out of 7	15.9944	upregulated	21	1.84708	0.1577	upregulated	26	5.9953	0.0025	upregulated	12	1.36392	0.2557	upregulated	3	0.418767	0.6579	downregulated	70	1.94505	0.143	downregulated	36	4.4243	0.012
serine/threonine protein kinase complex	GO	5 out of 7	15.9669	upregulated	6	2.08075	0.1248	upregulated	4	5.40323	0.0045	upregulated	3	1.2238	0.2941	downregulated	5	1.549	0.2125	downregulated	21	2.94909	0.0524	downregulated	13	5.85906	0.0029
oxidoreductase activity, acting on NAD(P)H, quinone or similar compound as acceptor	GO	3 out of 7	15.9158	upregulated	2	0.592191	0.5531	downregulated	1	1.41001	0.2441	downregulated	3	0.640367	0.5271	downregulated	3	2.9138	0.0543	downregulated	21	10.8145	2e-05	downregulated	11	9.4733	7.7e-05
myosin binding	GO	4 out of 7	15.9048	downregulated	3	6.2253	0.002	upregulated	1	0.172012	0.842	downregulated	9	4.47444	0.0114	upregulated	1	1.20345	0.3002	downregulated	17	10.433	2.9e-05	downregulated	12	8.57078	0.0002
histone binding	GO	5 out of 7	15.8908	upregulated	14	2.43839	0.0873	upregulated	17	7.50062	0.0006	upregulated	5	1.28078	0.2778	upregulated	5	2.88803	0.0557	upregulated	18	0.3993	0.6708	downregulated	13	2.18227	0.1128
photoreceptor cell development	GO	4 out of 7	15.8012	upregulated	2	4.01839	0.018	downregulated	1	1.55904	0.2103	upregulated	1	0.479936	0.6188	downregulated	1	0.389486	0.6774	downregulated	11	6.29858	0.0018	downregulated	7	10.5065	2.7e-05	upregulated	1	3.55376	0.0286
regulation of delayed rectifier potassium channel activity	GO	3 out of 7	15.7814	upregulated	2	2.47924	0.0838													downregulated	7	9.27985	9.3e-05	downregulated	3	4.02229	0.0179
regulation of cardiac muscle cell differentiation	GO	3 out of 7	15.7471	upregulated	3	4.72004	0.0089					downregulated	3	3.79086	0.0226	downregulated	2	2.17202	0.1139	downregulated	8	9.60914	6.7e-05	downregulated	4	7.38082	0.0006
phosphatidylinositol phosphate phosphatase activity	GO	4 out of 7	15.7142	upregulated	4	2.31942	0.0983	downregulated	1	0.783275	0.4569	downregulated	3	2.53292	0.0794	upregulated	1	2.72501	0.0655	downregulated	10	6.31767	0.0018	downregulated	7	7.66828	0.0005
endoplasmic reticulum tubular network	GO	3 out of 7	15.6511	upregulated	5	6.34038	0.0018					downregulated	1	0.336778	0.7141	downregulated	2	1.35366	0.2583	downregulated	7	4.5286	0.0108	downregulated	5	6.47259	0.0015
mitochondrial transport	GO	2 out of 7	15.5703	downregulated	5	0.822797	0.4392	downregulated	3	0.704532	0.4943	downregulated	11	2.23976	0.1065	upregulated	1	0.909094	0.4029	downregulated	60	34.6734	8.7e-16	downregulated	31	18.4283	9.9e-09
protein transmembrane import into intracellular organelle	GO	5 out of 7	15.5079	upregulated	1	0.737647	0.4782	upregulated	1	1.0139	0.3628	upregulated	1	1.27296	0.28					downregulated	13	9.64879	6.5e-05	downregulated	5	2.83461	0.0587
kinase regulator activity	GO	4 out of 7	15.4978	upregulated	10	0.955035	0.3848	upregulated	7	2.38253	0.0923	downregulated	14	4.93743	0.0072	downregulated	8	4.8296	0.008	downregulated	44	4.5001	0.0111	downregulated	29	12.4898	3.8e-06
protein transmembrane transport	GO	4 out of 7	15.4936	upregulated	3	0.49346	0.6105	upregulated	2	0.937712	0.3915	downregulated	1	5.24638	0.0053					downregulated	21	15.1771	2.6e-07	downregulated	8	4.13172	0.0161
carbohydrate metabolic process	GO	1 out of 7	15.4934	downregulated	6	3.35987	0.0347	upregulated	21	4.65	0.0096	upregulated	16	4.67798	0.0093	downregulated	18	2.64967	0.0707	downregulated	76	11.9967	6.2e-06	downregulated	56	18.4566	9.6e-09	upregulated	1	2.96317	0.0517
regulation of long term synaptic depression	GO	3 out of 7	15.4852	upregulated	1	0.792063	0.4529	downregulated	1	1.52403	0.2178									downregulated	5	7.71999	0.0004	downregulated	5	8.49715	0.0002
tRNA 5'-end processing	GO	4 out of 7	15.4184	upregulated	1	1.41563	0.2428					upregulated	2	4.11542	0.0163	downregulated	1	1.12947	0.3232	downregulated	6	5.88875	0.0028	downregulated	4	5.12805	0.0059
oxidative phosphorylation	GO	1 out of 7	15.3802	upregulated	4	1.05577	0.3479	upregulated	3	1.17225	0.3097	upregulated	2	0.709627	0.4918					downregulated	40	40.0584	4e-18	downregulated	18	15.3802	2.1e-07
nodal signaling pathway	GO	4 out of 7	15.2961	upregulated	3	7.42387	0.0006					upregulated	1	1.24646	0.2875	upregulated	1	3.27105	0.038	downregulated	4	5.41558	0.0044	upregulated	1	2.06087	0.1273
positive regulation of proteasomal protein catabolic process	GO	4 out of 7	15.2588	upregulated	7	1.86947	0.1542	upregulated	6	2.65153	0.0705	downregulated	8	2.28251	0.102	downregulated	4	0.615762	0.5402	downregulated	24	8.61272	0.0002	downregulated	13	5.02339	0.0066
response to extracellular stimulus	GO	4 out of 7	15.2528	downregulated	9	3.81619	0.022	upregulated	17	5.9844	0.0025	upregulated	24	7.16824	0.0008	downregulated	27	10.2238	3.6e-05	downregulated	69	11.6257	8.9e-06	downregulated	43	7.24607	0.0007	upregulated	1	2.73164	0.0651
ATP synthesis coupled proton transport	GO	2 out of 7	15.2301																	downregulated	8	12.7456	2.9e-06	downregulated	2	2.4845	0.0834
positive regulation of long-term synaptic potentiation	GO	3 out of 7	15.1912					downregulated	1	1.29153	0.2749	upregulated	1	2.70822	0.0667					downregulated	7	6.49951	0.0015	downregulated	5	7.27497	0.0007
microtubule anchoring at microtubule organizing center	GO	5 out of 7	15.1354					upregulated	1	3.36469	0.0346	upregulated	1	1.13137	0.3226	upregulated	1	2.24876	0.1055	downregulated	2	1.48423	0.2267	downregulated	4	6.90632	0.001
skeletal muscle fiber development	GO	4 out of 7	15.0093	upregulated	1	4.44264	0.0118	upregulated	1	2.86693	0.0569	downregulated	1	0.42605	0.6531					downregulated	4	3.09179	0.0454	downregulated	3	5.034	0.0065
ciliary basal body-plasma membrane docking	GO	4 out of 7	14.9439	upregulated	12	7.3842	0.0006	upregulated	8	6.94068	0.001	downregulated	11	3.82358	0.0218	downregulated	4	2.34038	0.0963	downregulated	23	3.87556	0.0207	downregulated	10	2.90746	0.0546
sodium ion import across plasma membrane	GO	4 out of 7	14.8168									upregulated	1	1.73694	0.1761	upregulated	1	2.70527	0.0669	downregulated	5	4.99759	0.0068	downregulated	4	5.37696	0.0046
cellular modified amino acid metabolic process	GO	3 out of 7	14.785	downregulated	2	0.10756	0.898	upregulated	9	4.43891	0.0118	upregulated	4	5.43077	0.0044	downregulated	5	0.756416	0.4693	upregulated	17	3.82311	0.0219	downregulated	17	5.77934	0.0031
pigment metabolic process	GO	5 out of 7	14.7702	upregulated	3	0.924938	0.3966	upregulated	6	5.60997	0.0037	upregulated	6	4.95184	0.0071	upregulated	2	2.9897	0.0503	downregulated	11	3.10599	0.0448	upregulated	3	2.81226	0.0601
multivesicular body sorting pathway	GO	5 out of 7	14.7687	upregulated	2	3.2247	0.0398	upregulated	3	1.98989	0.1367	upregulated	2	1.50967	0.221	downregulated	1	0.337941	0.7132	downregulated	9	4.12844	0.0161	downregulated	2	4.25393	0.0142
mating behavior	GO	4 out of 7	14.6535					upregulated	1	1.19458	0.3028	upregulated	3	5.17733	0.0056	upregulated	2	5.52369	0.004	downregulated	7	6.71888	0.0012	downregulated	2	2.75787	0.0634
inositol phosphate phosphatase activity	GO	4 out of 7	14.5864	upregulated	2	1.81646	0.1626	downregulated	1	1.0329	0.356	downregulated	2	2.19238	0.1117	upregulated	1	3.04307	0.0477	downregulated	7	7.97465	0.0003	downregulated	4	4.97755	0.0069
outer mitochondrial membrane protein complex	GO	4 out of 7	14.5833	upregulated	1	0.702666	0.4953	upregulated	1	0.992992	0.3705	downregulated	2	1.5654	0.209					downregulated	7	7.5425	0.0005	downregulated	5	6.9105	0.001
cytoskeletal adaptor activity	GO	4 out of 7	14.5499					upregulated	2	2.95168	0.0523	upregulated	2	2.97218	0.0512	upregulated	1	4.14385	0.0159	downregulated	3	0.607829	0.5445	downregulated	3	4.48223	0.0113
regulation of dendritic spine maintenance	GO	4 out of 7	14.5464					downregulated	1	1.94951	0.1423	upregulated	1	2.79778	0.0609	upregulated	1	2.91344	0.0543	downregulated	4	3.84957	0.0213	downregulated	3	6.93512	0.001
rhythmic behavior	GO	4 out of 7	14.5032	upregulated	2	3.92284	0.0198					upregulated	2	3.23325	0.0394	upregulated	2	5.9854	0.0025	downregulated	7	5.26903	0.0051	downregulated	2	1.36169	0.2562
maintenance of protein localization in organelle	GO	5 out of 7	14.4947	upregulated	3	2.67907	0.0686	upregulated	4	6.22405	0.002	upregulated	2	1.38191	0.2511	downregulated	2	0.755334	0.4699	downregulated	7	1.06138	0.346	downregulated	3	3.90363	0.0202
ribonucleoprotein complex assembly	GO	6 out of 7	14.4587	upregulated	8	1.1339	0.3218	upregulated	14	3.97372	0.0188	upregulated	9	2.18066	0.113	upregulated	2	0.581011	0.5593	downregulated	33	2.26321	0.104	downregulated	21	4.32624	0.0132
response to carbohydrate	GO	3 out of 7	14.4542	downregulated	3	4.23207	0.0145	upregulated	7	3.73184	0.0239	downregulated	13	3.54748	0.0288	upregulated	4	4.75076	0.0086	downregulated	30	9.95407	4.8e-05	downregulated	13	8.54782	0.0002
pigment cell differentiation	GO	4 out of 7	14.4349	upregulated	2	3.84553	0.0214	upregulated	2	3.48544	0.0306	downregulated	1	0.535548	0.5853					downregulated	8	5.94416	0.0026	downregulated	2	1.69528	0.1835
regulation of microtubule binding	GO	3 out of 7	14.4214	upregulated	2	3.79393	0.0225					downregulated	1	0.879127	0.4151					downregulated	5	6.53021	0.0015	downregulated	3	4.97636	0.0069
nucleoside metabolic process	GO	5 out of 7	14.3791	upregulated	9	3.52378	0.0295	upregulated	6	1.94658	0.1428	downregulated	8	1.48048	0.2275	upregulated	2	1.30606	0.2709	downregulated	25	6.85125	0.0011	downregulated	12	3.83064	0.0217	upregulated	1	1.59876	0.2021
kinase inhibitor activity	GO	3 out of 7	14.2987	upregulated	5	2.31779	0.0985	downregulated	1	1.33482	0.2632	downregulated	2	1.28774	0.2759	downregulated	1	1.28774	0.2759	downregulated	17	4.44006	0.0118	downregulated	13	10.1634	3.9e-05
homophilic cell adhesion via plasma membrane adhesion molecules	GO	3 out of 7	14.2406	upregulated	8	4.46115	0.0115	downregulated	3	1.50298	0.2225	upregulated	5	3.08682	0.0456	downregulated	3	2.621	0.0727	downregulated	36	14.7263	4e-07	downregulated	23	13.4323	1.5e-06	upregulated	1	2.61572	0.0731
negative regulation of synapse organization	GO	4 out of 7	14.2124	upregulated	3	2.45923	0.0855	upregulated	3	4.9929	0.0068	downregulated	2	1.89751	0.1499	downregulated	5	5.79561	0.003	downregulated	8	7.92313	0.0004	downregulated	3	6.53025	0.0015
spermatid differentiation	GO	6 out of 7	14.2105	upregulated	9	2.53056	0.0796	upregulated	6	1.76991	0.1703	upregulated	6	3.18245	0.0415	upregulated	4	2.90067	0.055	downregulated	24	1.90882	0.1483	downregulated	10	1.91811	0.1469
structural constituent of cytoskeleton	GO	1 out of 7	14.1097	downregulated	1	0.907895	0.4034	upregulated	1	1.61721	0.1985	upregulated	2	1.66517	0.1892	upregulated	3	4.32265	0.0133	downregulated	26	13.379	1.5e-06	downregulated	20	14.1097	7.5e-07
disulfide oxidoreductase activity	GO	6 out of 7	14.0773	upregulated	3	1.18022	0.3072	upregulated	1	1.54467	0.2134	upregulated	1	0.410413	0.6634	upregulated	1	1.4288	0.2396	downregulated	10	5.82105	0.003	downregulated	6	3.69219	0.0249
mating	GO	5 out of 7	14.0438	upregulated	1	1.04327	0.3523	upregulated	1	0.801582	0.4486	upregulated	4	5.59543	0.0037	upregulated	2	4.7108	0.009	downregulated	9	6.98189	0.0009	downregulated	2	1.8927	0.1507
GTP-dependent protein binding	GO	3 out of 7	13.8674	upregulated	1	3.98333	0.0186	downregulated	1	4.526	0.0108	downregulated	2	0.99144	0.371					downregulated	5	12.896	2.5e-06	downregulated	3	2.50555	0.0816
cell cycle DNA replication	GO	3 out of 7	13.719	upregulated	4	5.41972	0.0044	upregulated	4	8.33587	0.0002	downregulated	3	1.83202	0.1601	downregulated	2	1.52587	0.2174	downregulated	8	3.32131	0.0361
iron-sulfur cluster binding	GO	4 out of 7	13.7019	upregulated	3	1.10913	0.3298	upregulated	1	4.1292	0.0161	downregulated	6	1.88932	0.1512	downregulated	3	1.57767	0.2065	downregulated	16	7.69014	0.0005	downregulated	8	4.24038	0.0144
learned vocalization behavior or vocal learning	GO	3 out of 7	13.6791	upregulated	1	2.94037	0.0528					downregulated	1	0.572528	0.5641					downregulated	5	6.16598	0.0021	downregulated	3	5.14526	0.0058
muscle contraction	GO	3 out of 7	13.597	upregulated	13	5.22716	0.0054	downregulated	4	2.07169	0.126	downregulated	14	3.138	0.0434	upregulated	3	2.55526	0.0777	downregulated	46	18.5454	8.8e-09	downregulated	29	12.3764	4.2e-06	upregulated	1	1.3521	0.2587
AV node cell to bundle of His cell communication	GO	4 out of 7	13.5485	upregulated	1	2.98055	0.0508					upregulated	2	3.3446	0.0353	downregulated	1	2.77557	0.0623	downregulated	5	7.78647	0.0004	downregulated	2	2.21247	0.1094
retrograde transport, endosome to plasma membrane	GO	5 out of 7	13.5195	upregulated	3	4.46077	0.0116	downregulated	2	3.2497	0.0388	upregulated	1	2.57685	0.076	upregulated	1	1.8279	0.1608	downregulated	6	6.26181	0.0019	downregulated	2	1.64183	0.1936
heme-copper terminal oxidase activity	GO	5 out of 7	13.518	upregulated	1	1.46654	0.2307	upregulated	2	2.30734	0.0995	upregulated	1	0.93659	0.392					downregulated	7	5.0836	0.0062	downregulated	4	3.72389	0.0241
positive regulation of glutamate receptor signaling pathway	GO	2 out of 7	13.4371																	downregulated	6	7.64434	0.0005	downregulated	3	5.7928	0.003
positive regulation of proteolysis involved in cellular protein catabolic process	GO	4 out of 7	13.4112	upregulated	8	1.87332	0.1536	upregulated	7	2.80364	0.0606	downregulated	12	4.625	0.0098	downregulated	7	1.60146	0.2016	downregulated	28	9.15015	0.0001	downregulated	15	5.81052	0.003
feeding behavior	GO	5 out of 7	13.3553	upregulated	6	5.80826	0.003	upregulated	2	0.884521	0.4129	upregulated	3	1.86163	0.1554	upregulated	1	0.73398	0.48	downregulated	25	19.4699	3.5e-09	downregulated	8	4.06692	0.0171
transferase activity, transferring sulfur-containing groups	GO	4 out of 7	13.3505	upregulated	2	1.82315	0.1615					upregulated	3	4.96863	0.007	downregulated	2	2.45629	0.0858	downregulated	11	2.59626	0.0746	downregulated	5	6.41878	0.0016
negative regulation of voltage-gated calcium channel activity	GO	5 out of 7	13.3317	upregulated	1	2.12611	0.1193					upregulated	1	1.40502	0.2454	upregulated	1	2.88958	0.0556	downregulated	4	5.06646	0.0063	downregulated	1	1.84455	0.1581
vesicle coat	GO	2 out of 7	13.263	downregulated	3	3.00988	0.0493	downregulated	2	1.68126	0.1861	downregulated	5	2.87942	0.0562	downregulated	4	1.58584	0.2048	downregulated	22	13.9082	9.1e-07	downregulated	11	8.51117	0.0002
sensory perception of light stimulus	GO	5 out of 7	13.2145	upregulated	9	3.96252	0.019	upregulated	4	1.25245	0.2858	upregulated	7	2.15518	0.1159	downregulated	6	2.42118	0.0888	downregulated	27	5.76881	0.0031	downregulated	18	6.04295	0.0024	upregulated	1	3.54619	0.0288
mitochondrial outer membrane	GO	1 out of 7	13.1848	downregulated	4	0.988315	0.3722	upregulated	7	3.0555	0.0471	downregulated	11	4.8292	0.008	downregulated	7	2.41123	0.0897	downregulated	46	19.2124	4.5e-09	downregulated	27	13.1848	1.9e-06
negative regulation of secretion by cell	GO	2 out of 7	13.154	downregulated	4	0.468024	0.6262	upregulated	6	9.49402	7.5e-05	downregulated	10	1.61597	0.1987	downregulated	8	3.30397	0.0367	downregulated	34	16.011	1.1e-07	upregulated	10	6.96311	0.0009
atrial cardiac muscle cell to AV node cell communication	GO	4 out of 7	13.1494	upregulated	1	2.66864	0.0693					upregulated	1	1.08774	0.337	downregulated	1	2.46594	0.0849	downregulated	4	6.20542	0.002	downregulated	4	5.65353	0.0035
establishment of protein localization to plasma membrane	GO	4 out of 7	13.1444	upregulated	4	1.65083	0.1919	downregulated	3	3.11349	0.0444	upregulated	1	1.70975	0.1809	downregulated	2	1.76632	0.171	downregulated	13	10.8656	1.9e-05	downregulated	6	3.79807	0.0224
protein-containing complex scaffold activity	GO	5 out of 7	13.096	upregulated	8	3.61155	0.027	upregulated	5	3.77093	0.023	downregulated	10	7.54092	0.0005	upregulated	1	1.49467	0.2243	downregulated	19	5.10498	0.0061	downregulated	12	6.65474	0.0013
negative regulation of neuron migration	GO	4 out of 7	13.0369	upregulated	2	3.19226	0.0411					upregulated	1	1.00732	0.3652					downregulated	4	6.55729	0.0014	downregulated	2	2.28006	0.1023
respiratory chain complex III	GO	2 out of 7	13.0334																	downregulated	6	8.85578	0.0001	downregulated	3	4.17761	0.0153
developmental maturation	GO	3 out of 7	12.9481	downregulated	4	2.871	0.0566	upregulated	1	3.33756	0.0355	downregulated	21	5.38866	0.0046	downregulated	10	4.36686	0.0127	downregulated	44	13.5895	1.3e-06	downregulated	25	8.64758	0.0002
organelle disassembly	GO	4 out of 7	12.9457	upregulated	2	0.594905	0.5516	upregulated	1	0.107565	0.898	downregulated	4	1.26691	0.2817	downregulated	4	1.82065	0.1619	downregulated	14	5.56528	0.0038	downregulated	11	8.49862	0.0002
protein self-association	GO	4 out of 7	12.9219	upregulated	3	1.46104	0.232	upregulated	3	6.38657	0.0017	downregulated	3	2.80372	0.0606	downregulated	2	1.8316	0.1602	downregulated	12	5.6225	0.0036	downregulated	7	4.0871	0.0168
vacuolar proton-transporting V-type ATPase complex	GO	2 out of 7	12.9066													downregulated	1	0.980334	0.3752	downregulated	5	8.03208	0.0003	downregulated	5	5.85481	0.0029
cerebellar cortex development	GO	4 out of 7	12.8997					upregulated	1	0.545706	0.5794	upregulated	1	1.38191	0.2511	downregulated	1	0.457863	0.6326	downregulated	13	6.24445	0.0019	downregulated	7	5.18553	0.0056
mitochondrial electron transport, NADH to ubiquinone	GO	1 out of 7	12.8836	upregulated	2	1.00306	0.3668	downregulated	1	1.73564	0.1763									downregulated	22	21.0677	7.1e-10	downregulated	11	12.8836	2.5e-06
negative regulation of response to oxidative stress	GO	4 out of 7	12.852	upregulated	4	2.35047	0.0953	upregulated	2	3.51514	0.0297	downregulated	4	3.13387	0.0435	downregulated	2	1.75723	0.1725	downregulated	11	5.35608	0.0047	downregulated	6	6.5214	0.0015
cyclic nucleotide binding	GO	3 out of 7	12.8296	downregulated	1	2.19944	0.1109					downregulated	3	2.144	0.1172	upregulated	1	1.3485	0.2596	downregulated	11	7.10384	0.0008	downregulated	6	8.72065	0.0002
regulation of actin polymerization or depolymerization	GO	3 out of 7	12.8154	upregulated	10	1.17062	0.3102	upregulated	8	2.37168	0.0933	downregulated	14	2.4148	0.0894	downregulated	8	5.46958	0.0042	downregulated	37	8.81945	0.0001	downregulated	30	17.1574	3.5e-08
unfolded protein binding	GO	4 out of 7	12.7853	upregulated	5	1.50343	0.2224	upregulated	3	1.93852	0.1439	downregulated	6	0.851469	0.4268	downregulated	2	0.355616	0.7007	downregulated	28	9.1923	0.0001	downregulated	9	1.35809	0.2572
ERAD pathway	GO	4 out of 7	12.7634	upregulated	7	3.07385	0.0462	upregulated	10	9.25656	9.5e-05	upregulated	3	0.876082	0.4164	downregulated	4	0.903255	0.4052	downregulated	19	4.05319	0.0174	upregulated	2	1.86881	0.1543	upregulated	1	1.72421	0.1783
chromatin assembly	GO	3 out of 7	12.7419	upregulated	9	3.61304	0.027	upregulated	12	10.3789	3.1e-05	downregulated	7	1.06644	0.3442	downregulated	5	1.70087	0.1825	downregulated	12	2.13322	0.1185	upregulated	4	0.616018	0.5401
positive regulation of sodium ion transmembrane transporter activity	GO	4 out of 7	12.7268	upregulated	1	1.19539	0.3026					upregulated	1	2.56391	0.077	downregulated	1	1.01348	0.363	downregulated	7	5.96266	0.0026	downregulated	3	4.01828	0.018
UDP-glycosyltransferase activity	GO	5 out of 7	12.7063	upregulated	2	1.68795	0.1849	upregulated	6	2.8271	0.0592	upregulated	6	4.78976	0.0083	downregulated	7	1.86025	0.1556	downregulated	22	3.02083	0.0488	downregulated	15	5.53889	0.0039	upregulated	1	3.29797	0.037
regulation of autophagy of mitochondrion	GO	3 out of 7	12.7041	downregulated	1	0.748042	0.4733	upregulated	1	0.25391	0.7758	downregulated	4	2.46626	0.0849	downregulated	4	3.37665	0.0342	downregulated	11	6.749	0.0012	downregulated	11	12.2921	4.6e-06
nucleotide-sugar metabolic process	GO	5 out of 7	12.6978	upregulated	3	1.62747	0.1964	upregulated	3	4.10813	0.0164	upregulated	2	2.339	0.0964					downregulated	6	2.55966	0.0773	downregulated	4	2.06356	0.127
neuropeptide binding	GO	3 out of 7	12.6923	upregulated	1	4.14601	0.0158					downregulated	1	0.434128	0.6478					downregulated	5	6.03646	0.0024	downregulated	3	2.94392	0.0527
positive regulation of sodium ion transmembrane transport	GO	4 out of 7	12.6654	upregulated	1	0.934262	0.3929					upregulated	1	2.24664	0.1058	downregulated	1	0.761699	0.4669	downregulated	9	7.11191	0.0008	downregulated	3	3.13431	0.0435
reflex	GO	2 out of 7	12.5514					downregulated	1	1.2602	0.2836	downregulated	1	0.260223	0.7709					downregulated	8	8.19	0.0003	downregulated	3	5.88181	0.0028
positive regulation of insulin secretion involved in cellular response to glucose stimulus	GO	4 out of 7	12.5212	upregulated	2	1.45849	0.2326					upregulated	1	0.751989	0.4714					downregulated	8	6.78465	0.0011	downregulated	4	3.52609	0.0294
positive regulation of feeding behavior	GO	3 out of 7	12.5184	upregulated	1	1.68702	0.1851													downregulated	4	6.04433	0.0024	downregulated	3	4.78709	0.0083
dopamine metabolic process	GO	4 out of 7	12.4321	upregulated	2	1.05859	0.3469	upregulated	1	2.67716	0.0688	downregulated	2	3.50457	0.0301	downregulated	2	2.6931	0.0677	downregulated	7	8.45198	0.0002	downregulated	4	6.44205	0.0016
response to monoamine	GO	3 out of 7	12.4286	upregulated	3	3.04033	0.0478	downregulated	1	3.57121	0.0281	downregulated	3	1.26599	0.282	downregulated	1	0.396885	0.6724	downregulated	13	11.0617	1.6e-05	downregulated	5	3.56061	0.0284
response to catecholamine	GO	3 out of 7	12.4286	upregulated	3	3.04033	0.0478	downregulated	1	3.57121	0.0281	downregulated	3	1.26599	0.282	downregulated	1	0.396885	0.6724	downregulated	13	11.0617	1.6e-05	downregulated	5	3.56061	0.0284
regulation of Golgi organization	GO	4 out of 7	12.3963	upregulated	2	2.99181	0.0502	upregulated	1	0.712587	0.4904	downregulated	2	2.56905	0.0766	downregulated	2	2.31012	0.0992	downregulated	6	5.78718	0.0031	downregulated	5	7.78385	0.0004
isomerase activity	GO	3 out of 7	12.3791	downregulated	2	2.23283	0.1072	upregulated	5	2.44386	0.0868	downregulated	6	1.69035	0.1845	downregulated	6	2.44307	0.0869	downregulated	29	9.32989	8.9e-05	downregulated	15	5.2812	0.0051
response to nutrient levels	GO	4 out of 7	12.3042	downregulated	9	4.04072	0.0176	upregulated	17	6.11429	0.0022	upregulated	21	4.51427	0.011	downregulated	26	10.3667	3.1e-05	downregulated	66	11.6917	8.4e-06	downregulated	40	7.1803	0.0008	upregulated	1	2.78899	0.0615
acetylcholine receptor activity	GO	2 out of 7	12.304																	downregulated	2	4.79725	0.0083	downregulated	5	7.50676	0.0005
NADH dehydrogenase activity	GO	1 out of 7	12.2921	upregulated	2	0.968021	0.3798	downregulated	1	1.71013	0.1808									downregulated	20	15.4512	1.9e-07	downregulated	11	12.2921	4.6e-06
carbon-nitrogen lyase activity	GO	4 out of 7	12.2895	upregulated	2	3.02976	0.0483	upregulated	1	2.84757	0.058	downregulated	1	0.543173	0.5809					downregulated	4	3.44181	0.032	downregulated	3	3.51355	0.0298
integral component of postsynaptic membrane	GO	4 out of 7	12.2475	upregulated	1	1.62853	0.1962					upregulated	1	3.61362	0.027					downregulated	3	3.26251	0.0383	downregulated	1	3.74285	0.0237
protein tag	GO	4 out of 7	12.2185	upregulated	3	5.80501	0.003	upregulated	1	1.35367	0.2583									downregulated	3	2.72851	0.0653	downregulated	2	2.33133	0.0972
postsynaptic membrane assembly	GO	4 out of 7	12.2173	upregulated	2	4.34383	0.013					upregulated	1	1.96962	0.1395					downregulated	4	3.80067	0.0224	downregulated	2	2.10317	0.1221
ligase activity	GO	4 out of 7	12.1678	downregulated	5	1.87567	0.1533	upregulated	8	2.81901	0.0597	upregulated	9	5.09494	0.0061	downregulated	4	1.65159	0.1917	downregulated	35	5.49863	0.0041	downregulated	12	2.28252	0.102
peptide secretion	GO	1 out of 7	12.0535	upregulated	5	2.16274	0.115	upregulated	2	1.65632	0.1908	upregulated	6	2.19479	0.1114	downregulated	7	3.05521	0.0471	downregulated	36	12.3602	4.3e-06	downregulated	20	12.0535	5.8e-06	upregulated	2	4.76833	0.0085
positive regulation of cellular protein catabolic process	GO	4 out of 7	12.0443	upregulated	10	2.18725	0.1122	upregulated	8	2.71827	0.066	downregulated	13	4.55006	0.0106	downregulated	8	1.62061	0.1978	downregulated	32	7.97132	0.0003	downregulated	16	5.33811	0.0048
regulation of cytoplasmic translation	GO	5 out of 7	12.0287	upregulated	2	2.41613	0.0893	upregulated	2	1.30036	0.2724	upregulated	4	5.94498	0.0026	upregulated	1	3.85066	0.0213	upregulated	1	2.24155	0.1063	downregulated	1	0.758088	0.4686
negative regulation of cellular protein localization	GO	3 out of 7	12.0281	upregulated	7	2.1211	0.1199	downregulated	3	3.53273	0.0292	upregulated	3	3.35335	0.035	downregulated	4	1.38386	0.2506	upregulated	16	7.7962	0.0004	downregulated	20	12.8299	2.7e-06	upregulated	1	1.35964	0.2568
negative regulation of oxidative stress-induced cell death	GO	4 out of 7	12.0179	upregulated	4	2.53283	0.0794	upregulated	2	3.59938	0.0273	downregulated	4	3.21633	0.0401	downregulated	2	1.81664	0.1626	downregulated	9	4.35555	0.0128	downregulated	6	6.56307	0.0014
negative regulation of cellular response to oxidative stress	GO	4 out of 7	12.0179	upregulated	4	2.53283	0.0794	upregulated	2	3.59938	0.0273	downregulated	4	3.21633	0.0401	downregulated	2	1.81664	0.1626	downregulated	9	4.35555	0.0128	downregulated	6	6.56307	0.0014
regulation of renal sodium excretion	GO	4 out of 7	11.9993					upregulated	1	3.65017	0.026	upregulated	3	3.97414	0.0188	upregulated	2	5.33728	0.0048	downregulated	1	5.80307	0.003	upregulated	2	6.7654	0.0012
protein localization to cilium	GO	6 out of 7	11.9534	upregulated	4	1.98165	0.1378	upregulated	2	0.851141	0.4269	upregulated	3	2.78136	0.062	upregulated	1	1.40992	0.2442	downregulated	8	2.3689	0.0936	downregulated	3	2.5604	0.0773
cellular response to catecholamine stimulus	GO	3 out of 7	11.9115	upregulated	3	3.20331	0.0406	downregulated	1	3.69315	0.0249	downregulated	3	1.38596	0.2501	downregulated	1	0.433549	0.6482	downregulated	12	10.3624	3.2e-05	downregulated	5	3.85847	0.0211
cell cortex	GO	1 out of 7	11.907	upregulated	14	3.34547	0.0352	upregulated	14	2.93862	0.0529	downregulated	37	15.4706	1.9e-07	downregulated	21	8.34804	0.0002	upregulated	49	19.0996	5.1e-09	downregulated	36	14.0546	7.9e-07	upregulated	1	2.14762	0.1168
oxidoreductase activity, acting on a sulfur group of donors	GO	6 out of 7	11.8664	upregulated	4	1.18329	0.3063	upregulated	2	1.20993	0.2982	upregulated	1	0.233789	0.7915	upregulated	1	1.12102	0.3259	downregulated	13	5.96314	0.0026	downregulated	6	2.15524	0.1159
phosphatidylinositol monophosphate phosphatase activity	GO	4 out of 7	11.8142	upregulated	1	0.668441	0.5125					downregulated	2	2.55084	0.078	upregulated	1	3.19648	0.0409	downregulated	6	3.2676	0.0381	downregulated	5	7.23252	0.0007
positive regulation of cell growth	GO	2 out of 7	11.7761	downregulated	4	1.79004	0.167	downregulated	4	3.32745	0.0359	downregulated	9	4.88216	0.0076	downregulated	12	5.24504	0.0053	downregulated	39	14.4876	5.1e-07	downregulated	24	12.5332	3.6e-06
regulation of cellular protein localization	GO	3 out of 7	11.742	upregulated	23	0.949873	0.3868	downregulated	11	3.51863	0.0296	upregulated	14	1.95829	0.1411	downregulated	21	2.26277	0.1041	upregulated	70	11.4727	1e-05	downregulated	67	26.4184	3.4e-12	upregulated	1	0.330426	0.7186
intercellular bridge	GO	5 out of 7	11.6954	upregulated	5	4.64193	0.0096	upregulated	3	3.66358	0.0256	downregulated	4	0.897706	0.4075	upregulated	1	1.69003	0.1845	downregulated	10	2.19116	0.1118	downregulated	3	0.406431	0.666
NAD binding	GO	4 out of 7	11.6459	downregulated	1	1.5744	0.2071	upregulated	2	0.916277	0.4	upregulated	2	1.66204	0.1898	upregulated	2	4.59994	0.0101	downregulated	14	4.60412	0.01	downregulated	7	3.09999	0.045
multicellular organism aging	GO	4 out of 7	11.569					upregulated	1	0.417358	0.6588	upregulated	2	7.01671	0.0009	downregulated	1	0.839474	0.4319	downregulated	6	1.96722	0.1398	downregulated	4	3.0072	0.0494
protein transmembrane transporter activity	GO	3 out of 7	11.5644	upregulated	1	0.518862	0.5952					downregulated	1	6.50167	0.0015					downregulated	9	10.5482	2.6e-05	downregulated	5	6.9991	0.0009
response to ischemia	GO	3 out of 7	11.4027	downregulated	1	0.471512	0.6241	upregulated	2	5.60177	0.0037	downregulated	1	2.04606	0.1292	downregulated	1	1.4191	0.2419	downregulated	8	5.16089	0.0057	downregulated	6	4.57667	0.0103
GTPase activator activity	GO	2 out of 7	11.3757	upregulated	16	3.65333	0.0259	downregulated	5	0.567428	0.567	downregulated	30	6.18376	0.0021	downregulated	20	8.98732	0.0001	downregulated	50	7.83756	0.0004	downregulated	29	7.72236	0.0004	downregulated	1	3.65333	0.0259
hormone biosynthetic process	GO	5 out of 7	11.3657	upregulated	1	1.20094	0.3009	upregulated	2	1.84611	0.1578	upregulated	2	2.15036	0.1164	downregulated	4	2.27721	0.1026	downregulated	7	4.37892	0.0125	downregulated	2	1.78934	0.1671
establishment of protein localization to peroxisome	GO	4 out of 7	11.3332	upregulated	2	0.341624	0.7106	upregulated	7	6.44734	0.0016	upregulated	4	5.78712	0.0031	downregulated	2	1.33984	0.2619	downregulated	10	0.580968	0.5594	upregulated	2	0.484042	0.6163
positive regulation of protein insertion into mitochondrial membrane involved in apoptotic signaling pathway	GO	3 out of 7	11.2519	downregulated	2	1.8526	0.1568	downregulated	1	1.3178	0.2677	upregulated	2	1.62611	0.1967	downregulated	1	0.642298	0.5261	downregulated	7	5.6225	0.0036	downregulated	6	7.81599	0.0004
respiratory chain complex IV	GO	3 out of 7	11.1925					upregulated	1	1.03225	0.3562									downregulated	5	5.215	0.0054	downregulated	4	4.94523	0.0071
guanyl-nucleotide exchange factor activity	GO	1 out of 7	11.1813	downregulated	11	5.93737	0.0026	upregulated	11	3.84403	0.0214	downregulated	35	14.2692	6.4e-07	downregulated	23	6.60396	0.0014	upregulated	49	8.19031	0.0003	downregulated	37	11.1813	1.4e-05
vesicle fusion	GO	3 out of 7	11.1729	upregulated	4	2.01208	0.1337	upregulated	5	3.79837	0.0224	downregulated	4	0.409796	0.6638	downregulated	4	1.69921	0.1828	downregulated	17	5.83787	0.0029	downregulated	7	7.47144	0.0006
antigen processing and presentation of peptide or polysaccharide antigen via MHC class II	GO	1 out of 7	11.1716	upregulated	3	5.46995	0.0042	upregulated	7	3.46771	0.0312	downregulated	16	23.9354	4e-11	downregulated	14	24.9582	1.4e-11	upregulated	16	16.6536	5.9e-08	downregulated	19	11.1716	1.4e-05
vacuolar membrane	GO	1 out of 7	11.0855	upregulated	16	3.99927	0.0183	upregulated	21	5.36863	0.0047	downregulated	43	27.8604	7.9e-13	downregulated	35	24.4563	2.4e-11	upregulated	47	14.6036	4.5e-07	downregulated	41	11.0855	1.5e-05
RNA polymerase II intronic transcription regulatory region sequence-specific DNA binding	GO	4 out of 7	11.0414	upregulated	2	3.07353	0.0463	upregulated	2	3.73996	0.0238					upregulated	1	3.69858	0.0248	downregulated	1	0.529283	0.589
Wnt-protein binding	GO	4 out of 7	11.0293	upregulated	2	3.9656	0.019					upregulated	1	1.31438	0.2686	upregulated	1	3.49592	0.0303	upregulated	5	5.38871	0.0046	downregulated	7	11.2653	1.3e-05	upregulated	1	3.62312	0.0267
regulation of transmission of nerve impulse	GO	4 out of 7	11.0171	upregulated	1	4.36763	0.0127					downregulated	1	3.50549	0.03	upregulated	1	2.84587	0.0581	downregulated	2	4.74165	0.0087	downregulated	2	2.56747	0.0767
IRE1-mediated unfolded protein response	GO	4 out of 7	10.9962	upregulated	1	0.976655	0.3766	downregulated	1	0.731349	0.4813	upregulated	4	3.18561	0.0414	downregulated	2	1.47375	0.2291	downregulated	13	3.8605	0.0211	downregulated	8	5.17856	0.0056
positive regulation of neuron death	GO	2 out of 7	10.957	downregulated	1	0.213517	0.8077	downregulated	2	3.03516	0.0481	downregulated	5	1.86844	0.1544	downregulated	4	3.10609	0.0448	downregulated	18	13.353	1.6e-06	downregulated	7	2.79204	0.0613
mRNA 3'-UTR AU-rich region binding	GO	5 out of 7	10.9435	upregulated	3	5.53121	0.004	upregulated	1	1.80328	0.1648	upregulated	3	4.90724	0.0074	upregulated	1	4.21049	0.0148	upregulated	3	6.87357	0.001	downregulated	1	1.36483	0.2554
Golgi cisterna	GO	5 out of 7	10.9291	upregulated	2	0.620893	0.5375	upregulated	4	1.69337	0.1839	upregulated	3	2.0702	0.1262	downregulated	5	1.77147	0.1701	downregulated	19	4.30771	0.0135	downregulated	12	4.00843	0.0182
regulation of ERAD pathway	GO	3 out of 7	10.8981	upregulated	5	4.8722	0.0077	upregulated	3	3.50628	0.03	downregulated	1	0.106642	0.8988	downregulated	1	0.543669	0.5806	downregulated	8	6.01859	0.0024	upregulated	1	2.84863	0.0579
BMP binding	GO	4 out of 7	10.8763	upregulated	1	1.04887	0.3503	downregulated	1	2.57767	0.076	upregulated	2	4.991	0.0068					downregulated	3	3.85884	0.0211	downregulated	2	3.5553	0.0286
negative regulation of sodium ion transmembrane transporter activity	GO	2 out of 7	10.8008					downregulated	1	3.41185	0.033									downregulated	6	9.1628	0.0001	downregulated	3	5.04985	0.0064
translation factor activity, RNA binding	GO	5 out of 7	10.7189	upregulated	3	0.153678	0.8575	upregulated	3	1.935	0.1444	upregulated	6	2.93399	0.0532	upregulated	1	2.69139	0.0678	downregulated	15	1.70497	0.1818	downregulated	8	3.0048	0.0495
regulation of oxidative stress-induced intrinsic apoptotic signaling pathway	GO	4 out of 7	10.7152	upregulated	3	2.16271	0.115					upregulated	1	0.684074	0.5046					downregulated	8	4.48155	0.0113	downregulated	4	3.38684	0.0338
regulation of exosomal secretion	GO	4 out of 7	10.7038	upregulated	1	1.18004	0.3073	upregulated	1	0.904103	0.4049					downregulated	1	1.38792	0.2496	downregulated	7	6.57935	0.0014	downregulated	3	3.42824	0.0324
G-protein alpha-subunit binding	GO	1 out of 7	10.6871	upregulated	1	3.69012	0.025	upregulated	1	1.11421	0.3282	downregulated	2	6.30469	0.0018	downregulated	1	4.19601	0.0151	downregulated	4	5.07346	0.0063	downregulated	3	10.6871	2.3e-05
regulation of protein depolymerization	GO	3 out of 7	10.6735	downregulated	3	1.43857	0.2373	upregulated	7	2.948	0.0524	upregulated	6	2.65586	0.0702	downregulated	4	5.95584	0.0026	upregulated	17	10.7601	2.1e-05	downregulated	16	12.464	3.9e-06
ovulation cycle	GO	5 out of 7	10.6345	upregulated	3	1.62692	0.1965	upregulated	2	2.15577	0.1158	upregulated	2	3.40016	0.0334	upregulated	1	3.65346	0.0259	upregulated	10	6.37834	0.0017	downregulated	8	6.17651	0.0021
subpallium development	GO	5 out of 7	10.6229	upregulated	1	1.74171	0.1752					upregulated	1	0.657126	0.5183	upregulated	1	2.47407	0.0842	downregulated	9	6.89814	0.001	downregulated	3	2.5101	0.0813	upregulated	1	3.65828	0.0258
membrane repolarization during action potential	GO	3 out of 7	10.5668					upregulated	1	1.49829	0.2235	downregulated	1	2.10689	0.1216					downregulated	7	7.41714	0.0006	downregulated	3	3.75825	0.0233
membrane repolarization during cardiac muscle cell action potential	GO	3 out of 7	10.5668					upregulated	1	1.49829	0.2235	downregulated	1	2.10689	0.1216					downregulated	7	7.41714	0.0006	downregulated	3	3.75825	0.0233
negative regulation of ERAD pathway	GO	4 out of 7	10.5639	upregulated	3	4.23777	0.0144	upregulated	1	1.65514	0.1911									downregulated	4	3.5311	0.0293	downregulated	1	1.13994	0.3198
establishment of protein localization to organelle	GO	5 out of 7	10.51	upregulated	21	0.726675	0.4835	upregulated	16	2.02639	0.1318	upregulated	12	2.3292	0.0974	downregulated	17	2.79881	0.0609	downregulated	77	5.65249	0.0035	downregulated	32	2.57407	0.0762
multivesicular body assembly	GO	5 out of 7	10.4915	upregulated	2	1.58792	0.2044	upregulated	3	2.86336	0.0571	upregulated	1	0.906522	0.4039	downregulated	1	0.617687	0.5392	downregulated	8	5.30037	0.005	downregulated	1	0.451036	0.637
guanyl-nucleotide exchange factor complex	GO	4 out of 7	10.4405	upregulated	4	7.03718	0.0009	upregulated	1	3.85334	0.0212	downregulated	3	3.19295	0.0411	downregulated	1	1.74171	0.1752	downregulated	2	0.679324	0.507	downregulated	3	3.80529	0.0223
ribosome biogenesis	GO	6 out of 7	10.3671	upregulated	16	2.89433	0.0553	upregulated	14	3.29162	0.0372	upregulated	4	1.39473	0.2479	upregulated	1	0.570378	0.5653	downregulated	48	1.27239	0.2802	downregulated	18	0.943606	0.3892
ligand-gated calcium channel activity	GO	3 out of 7	10.3608					downregulated	1	4.04242	0.0176	upregulated	1	2.40072	0.0907	downregulated	2	2.02493	0.132	downregulated	9	8.01298	0.0003	downregulated	2	6.0144	0.0024
photoreceptor cell differentiation	GO	3 out of 7	10.3368	upregulated	2	3.76387	0.0232	upregulated	2	2.38266	0.0923	downregulated	4	1.80121	0.1651	downregulated	1	0.26332	0.7685	downregulated	12	5.63522	0.0036	downregulated	7	9.55563	7.1e-05	upregulated	1	3.30081	0.0369
hormone metabolic process	GO	4 out of 7	10.3034	upregulated	3	1.38706	0.2498	upregulated	2	0.925225	0.3964	downregulated	9	3.39497	0.0335	downregulated	10	4.92484	0.0073	downregulated	24	8.77983	0.0002	downregulated	14	7.53113	0.0005
behavioral defense response	GO	1 out of 7	10.3006	downregulated	2	1.49257	0.2248	downregulated	1	1.11978	0.3264	upregulated	4	10.6896	2.3e-05					downregulated	15	18.0401	1.5e-08	downregulated	9	10.3006	3.4e-05
spanning component of membrane	GO	4 out of 7	10.2611	upregulated	1	1.31652	0.2681	downregulated	1	1.794	0.1663	upregulated	2	4.29771	0.0136					downregulated	4	4.48395	0.0113	downregulated	2	1.95692	0.1413
grooming behavior	GO	4 out of 7	10.1619	upregulated	1	2.70349	0.067					upregulated	1	1.86574	0.1548	upregulated	1	3.01118	0.0492	downregulated	2	2.66294	0.0697	downregulated	2	2.58147	0.0757
cell cycle G1/S phase transition	GO	4 out of 7	10.1531	upregulated	7	1.1765	0.3084	upregulated	14	12.9347	2.4e-06	upregulated	5	2.3156	0.0987	downregulated	11	5.5633	0.0038	upregulated	12	1.82432	0.1613	downregulated	6	1.11385	0.3283
peroxisome organization	GO	3 out of 7	10.0941	upregulated	3	0.492259	0.6112	upregulated	7	5.69656	0.0034	upregulated	4	5.49331	0.0041	downregulated	2	1.21297	0.2973	downregulated	12	0.769871	0.4631	upregulated	2	0.375045	0.6873
negative regulation of vascular smooth muscle cell proliferation	GO	3 out of 7	10.0731	upregulated	3	8.42688	0.0002					upregulated	2	2.62938	0.0721	upregulated	1	3.29365	0.0371	upregulated	4	2.07846	0.1251	upregulated	1	2.19834	0.111
establishment of skin barrier	GO	3 out of 7	10.0606	upregulated	1	1.65796	0.1905					downregulated	1	0.388522	0.6781					downregulated	3	1.4346	0.2382	downregulated	2	7.35657	0.0006
negative regulation of sodium ion transmembrane transport	GO	2 out of 7	10.0415					downregulated	1	3.37961	0.0341									downregulated	6	8.60887	0.0002	downregulated	3	4.81224	0.0081
protein kinase complex	GO	3 out of 7	9.97383	upregulated	8	3.20505	0.0406	upregulated	5	4.7877	0.0083	downregulated	10	2.00647	0.1345	downregulated	6	1.33196	0.264	upregulated	16	5.09257	0.0061	downregulated	14	5.3195	0.0049
cellular response to potassium ion	GO	2 out of 7	9.95163																	downregulated	4	4.94202	0.0071	downregulated	3	5.00961	0.0067
glycoprotein biosynthetic process	GO	4 out of 7	9.92227	upregulated	13	5.04663	0.0064	upregulated	19	8.14363	0.0003	upregulated	12	7.0121	0.0009	downregulated	13	5.20206	0.0055	downregulated	37	2.74488	0.0643	upregulated	6	5.35411	0.0047	upregulated	1	2.46879	0.0847
negative regulation of hydrogen peroxide-induced cell death	GO	4 out of 7	9.92151	upregulated	2	1.90144	0.1494	upregulated	2	5.27725	0.0051	downregulated	3	4.87157	0.0077	downregulated	1	2.62727	0.0723	downregulated	5	2.87296	0.0565	downregulated	3	7.3687	0.0006
voltage-gated calcium channel complex	GO	1 out of 7	9.86861	upregulated	5	6.9232	0.001	downregulated	2	1.80085	0.1652	upregulated	4	3.8364	0.0216					downregulated	21	23.8667	4.3e-11	downregulated	8	9.86861	5.2e-05
oxidoreductase activity, acting on diphenols and related substances as donors	GO	2 out of 7	9.86194																	downregulated	4	4.71668	0.0089	downregulated	3	5.14526	0.0058
positive regulation of potassium ion transmembrane transport	GO	2 out of 7	9.7863									downregulated	2	1.56384	0.2093	downregulated	1	0.600513	0.5485	downregulated	12	10.4138	3e-05	downregulated	3	1.5369	0.215
retinal binding	GO	5 out of 7	9.78489	upregulated	1	2.40486	0.0903					upregulated	1	1.71244	0.1804	upregulated	1	2.34984	0.0954	downregulated	3	1.973	0.139	downregulated	1	1.34475	0.2606
peptide hormone binding	GO	5 out of 7	9.77535	upregulated	2	2.83339	0.0588	upregulated	2	2.9996	0.0498	upregulated	3	2.07625	0.1254	upregulated	3	6.17398	0.0021	upregulated	10	4.01891	0.018	downregulated	6	5.19076	0.0056	upregulated	1	5.47972	0.0042
lipid storage	GO	5 out of 7	9.7608	upregulated	1	1.6055	0.2008	upregulated	3	2.79227	0.0613	upregulated	1	2.14879	0.1166	downregulated	2	1.68887	0.1847	downregulated	4	3.13789	0.0434	downregulated	2	1.76523	0.1711
mitochondrion localization	GO	2 out of 7	9.75865	downregulated	3	4.46033	0.0116	downregulated	1	0.518979	0.5951	downregulated	3	0.411489	0.6627					downregulated	12	8.71335	0.0002	downregulated	8	6.4361	0.0016
negative regulation of cellular protein catabolic process	GO	3 out of 7	9.75175	downregulated	1	2.03396	0.1308	upregulated	3	0.846149	0.4291	downregulated	5	1.554	0.2114	upregulated	1	1.48365	0.2268	downregulated	17	3.17515	0.0418	downregulated	8	5.73046	0.0032
CENP-A containing chromatin organization	GO	3 out of 7	9.70838	upregulated	3	2.33389	0.0969	upregulated	7	9.79667	5.6e-05	upregulated	2	1.8396	0.1589	downregulated	2	2.0697	0.1262	downregulated	2	0.374958	0.6873	upregulated	1	0.72744	0.4831
phosphatidylinositol-3,5-bisphosphate phosphatase activity	GO	3 out of 7	9.67447	upregulated	1	0.783858	0.4566					downregulated	2	2.94396	0.0527	downregulated	1	1.01244	0.3633	downregulated	6	5.32433	0.0049	downregulated	5	7.52268	0.0005
ciliary tip	GO	3 out of 7	9.52222					upregulated	4	3.8227	0.0219	upregulated	2	4.11796	0.0163					upregulated	3	1.25135	0.2861	downregulated	5	2.83291	0.0588
G-protein coupled peptide receptor activity	GO	4 out of 7	9.41735	upregulated	3	5.27374	0.0051	upregulated	4	6.18352	0.0021	downregulated	6	4.43962	0.0118	downregulated	3	3.64096	0.0262	downregulated	17	5.31895	0.0049	downregulated	7	0.721716	0.4859
nuclear import signal receptor activity	GO	4 out of 7	9.39197	upregulated	1	0.935715	0.3923									upregulated	1	2.55092	0.078	downregulated	2	1.78887	0.1671	downregulated	3	4.11647	0.0163
mitochondrial ribosome	GO	1 out of 7	9.39081	upregulated	9	5.63471	0.0036	upregulated	4	1.41803	0.2422	upregulated	3	1.48887	0.2256	upregulated	1	0.918966	0.3989	downregulated	25	8.1466	0.0003	downregulated	15	9.39081	8.3e-05
RNA polymerase III activity	GO	3 out of 7	9.38767	downregulated	1	1.33916	0.2621	upregulated	1	1.34281	0.2611	downregulated	1	1.40975	0.2442					downregulated	6	6.0932	0.0023	downregulated	4	4.70057	0.0091
positive regulation of voltage-gated potassium channel activity	GO	2 out of 7	9.35831																	downregulated	6	8.56797	0.0002	downregulated	1	0.790342	0.4537
negative regulation of signaling receptor activity	GO	4 out of 7	9.32218	downregulated	3	2.09069	0.1236					upregulated	4	4.17392	0.0154	upregulated	2	4.36191	0.0128	downregulated	6	0.490955	0.612	downregulated	3	2.38609	0.092
selective autophagy	GO	4 out of 7	9.31718	upregulated	1	0.561658	0.5703					upregulated	1	4.52591	0.0108	downregulated	2	1.38756	0.2497	downregulated	5	3.20991	0.0404	downregulated	3	2.40726	0.0901
DNA biosynthetic process	GO	3 out of 7	9.30319	upregulated	5	0.7355	0.4793	upregulated	10	9.8024	5.5e-05	downregulated	4	0.131745	0.8766	downregulated	4	1.42514	0.2405	downregulated	12	0.517363	0.5961	upregulated	1	0.195182	0.8227
regulation of membrane permeability	GO	3 out of 7	9.28555	downregulated	4	2.06615	0.1267	downregulated	1	0.559117	0.5717	downregulated	6	2.7078	0.0667	upregulated	1	1.59532	0.2028	downregulated	17	4.73605	0.0088	downregulated	12	8.28725	0.0003
neurotransmitter transporter activity	GO	1 out of 7	9.27322	upregulated	2	4.2684	0.014	upregulated	1	1.97071	0.1394	upregulated	1	6.42073	0.0016	downregulated	1	1.74976	0.1738	downregulated	12	11.4326	1.1e-05	downregulated	9	9.27322	9.4e-05
growth factor activity	GO	4 out of 7	9.25413	upregulated	6	2.34758	0.0956	upregulated	9	5.39446	0.0045	upregulated	4	1.39348	0.2482	downregulated	4	2.13071	0.1188	downregulated	14	6.72969	0.0012	downregulated	8	2.24931	0.1055
neuron migration	GO	1 out of 7	9.17112	upregulated	8	6.82245	0.0011	upregulated	5	2.42464	0.0885	upregulated	7	4.67207	0.0094	downregulated	8	3.98678	0.0186	downregulated	32	11.1544	1.4e-05	downregulated	17	9.17112	0.0001
cell redox homeostasis	GO	4 out of 7	9.15411	downregulated	1	0.496337	0.6088	upregulated	2	1.16849	0.3108	upregulated	1	0.209995	0.8106					downregulated	14	6.27864	0.0019	downregulated	6	1.99332	0.1362
negative regulation of calcineurin-mediated signaling	GO	3 out of 7	9.08785									upregulated	1	1.65408	0.1913					downregulated	5	3.99396	0.0184	downregulated	3	3.43981	0.0321
dendritic spine organization	GO	3 out of 7	9.08078	downregulated	1	0.771086	0.4625	downregulated	1	3.99667	0.0184	downregulated	4	2.8706	0.0567	upregulated	1	2.65985	0.07	downregulated	12	10.4138	3e-05	downregulated	4	3.64552	0.0261
sperm principal piece	GO	5 out of 7	9.07098	upregulated	1	0.648874	0.5226	upregulated	2	3.10522	0.0448	upregulated	1	1.47399	0.229					downregulated	3	1.0335	0.3558	downregulated	3	2.80939	0.0602
protein kinase inhibitor activity	GO	1 out of 7	9.03644	upregulated	5	2.54669	0.0783	downregulated	1	1.38946	0.2492	downregulated	2	1.34189	0.2614	downregulated	1	1.34189	0.2614	downregulated	16	3.82773	0.0218	downregulated	12	9.03644	0.0001
retrograde vesicle-mediated transport, Golgi to ER	GO	4 out of 7	9.01809	upregulated	1	0.207417	0.8127	upregulated	5	1.88515	0.1518	upregulated	2	0.486715	0.6146	downregulated	4	1.31806	0.2677	downregulated	21	9.20272	0.0001	downregulated	13	7.75687	0.0004
sequence-specific mRNA binding	GO	4 out of 7	9.01474	upregulated	1	1.57342	0.2073	upregulated	2	6.30588	0.0018	upregulated	1	1.45424	0.2336	downregulated	1	1.351	0.259	downregulated	2	1.03221	0.3562
hydrolase activity, acting on carbon-nitrogen (but not peptide) bonds, in linear amides	GO	4 out of 7	8.98915	upregulated	7	5.77389	0.0031	upregulated	5	4.08775	0.0168	downregulated	9	3.74054	0.0237	downregulated	4	2.18265	0.1127	downregulated	12	2.19251	0.1116	downregulated	4	0.67554	0.5089
monosaccharide metabolic process	GO	1 out of 7	8.96858	downregulated	3	4.18084	0.0153	downregulated	4	1.78062	0.1685	downregulated	4	1.08204	0.3389	downregulated	6	1.17069	0.3102	downregulated	33	6.95387	0.001	downregulated	27	12.7478	2.9e-06	upregulated	1	3.77921	0.0228
sperm capacitation	GO	4 out of 7	8.9539	upregulated	1	0.479303	0.6192					upregulated	1	2.09066	0.1236	upregulated	1	3.8895	0.0205	downregulated	4	2.49443	0.0825
mitotic nuclear division	GO	4 out of 7	8.94181	upregulated	12	4.11284	0.0164	upregulated	13	8.5501	0.0002	downregulated	14	4.07017	0.0171	downregulated	6	1.90877	0.1483	downregulated	24	1.59182	0.2036	downregulated	7	0.665987	0.5138
oxidoreductase activity, acting on NAD(P)H	GO	3 out of 7	8.93685	upregulated	3	0.346596	0.7071	upregulated	2	0.874883	0.4169	downregulated	8	1.65996	0.1901	downregulated	7	5.16653	0.0057	downregulated	26	9.15458	0.0001	downregulated	13	6.26217	0.0019
cell division	GO	4 out of 7	8.92871	upregulated	32	3.34462	0.0353	upregulated	36	13.4795	1.4e-06	downregulated	54	12.5853	3.4e-06	downregulated	26	3.62799	0.0266	downregulated	87	3.11209	0.0445	downregulated	41	5.66871	0.0035	upregulated	1	0.462884	0.6295
HOPS complex	GO	4 out of 7	8.92306	upregulated	1	2.66456	0.0696					downregulated	1	0.503328	0.6045	upregulated	1	2.46101	0.0853	downregulated	2	2.19529	0.1113	downregulated	2	2.10552	0.1218
membrane repolarization	GO	3 out of 7	8.91004					upregulated	1	1.36754	0.2547	downregulated	1	1.96682	0.1399					downregulated	7	6.21221	0.002	downregulated	3	3.29711	0.037
positive regulation of potassium ion transmembrane transporter activity	GO	2 out of 7	8.90964									downregulated	1	0.486597	0.6147	downregulated	1	0.834101	0.4343	downregulated	9	9.03651	0.0001	downregulated	2	1.19383	0.3031
large ribosomal subunit	GO	6 out of 7	8.89343	upregulated	10	3.6448	0.0261	upregulated	5	1.0564	0.3477	upregulated	3	0.761765	0.4668	upregulated	1	0.604979	0.5461	downregulated	23	1.96645	0.14	downregulated	9	0.859034	0.4236
water homeostasis	GO	5 out of 7	8.86982	upregulated	2	0.569015	0.5661	upregulated	1	3.37537	0.0342	upregulated	1	3.53978	0.029	upregulated	1	0.943037	0.3894	upregulated	5	5.7353	0.0032	downregulated	8	6.17791	0.0021
phosphatidylinositol-4,5-bisphosphate phosphatase activity	GO	3 out of 7	8.85542	upregulated	3	3.38613	0.0338	downregulated	1	1.51458	0.2199	downregulated	1	1.96285	0.1405	downregulated	1	1.21701	0.2961	downregulated	5	5.53093	0.004	downregulated	3	4.63281	0.0097
thiol-dependent ubiquitinyl hydrolase activity	GO	5 out of 7	8.84843	upregulated	7	0.866288	0.4205	upregulated	12	6.13803	0.0022	upregulated	4	1.76256	0.1716	downregulated	7	2.60529	0.0739	downregulated	15	0.404578	0.6673	downregulated	8	2.28226	0.1021
ubiquitinyl hydrolase activity	GO	5 out of 7	8.84843	upregulated	7	0.866288	0.4205	upregulated	12	6.13803	0.0022	upregulated	4	1.76256	0.1716	downregulated	7	2.60529	0.0739	downregulated	15	0.404578	0.6673	downregulated	8	2.28226	0.1021
clathrin-coated pit	GO	1 out of 7	8.84568	downregulated	3	2.17161	0.114	downregulated	3	1.57871	0.2062	downregulated	8	8.02582	0.0003	downregulated	7	4.66906	0.0094	downregulated	26	20.0509	2e-09	downregulated	12	8.84568	0.0001
positive regulation of viral release from host cell	GO	4 out of 7	8.80826	upregulated	1	1.25966	0.2838	upregulated	3	5.24485	0.0053	upregulated	1	1.41871	0.242					downregulated	2	0.885044	0.4127
cellular response to leucine starvation	GO	3 out of 7	8.78782					upregulated	2	6.00025	0.0025	upregulated	1	2.49528	0.0825					downregulated	1	0.292289	0.7466
chaperone complex	GO	3 out of 7	8.77864					upregulated	1	2.34827	0.0955									downregulated	5	3.43939	0.0321	downregulated	3	2.99098	0.0502
insemination	GO	4 out of 7	8.74142	upregulated	1	1.91183	0.1478	upregulated	1	1.56547	0.209	upregulated	2	3.79799	0.0224	upregulated	1	2.97573	0.051	downregulated	2	6.4777	0.0015	upregulated	1	1.5096	0.221
response to immobilization stress	GO	2 out of 7	8.70436																	downregulated	7	7.21305	0.0007	downregulated	2	1.49131	0.2251
phosphotransferase activity, phosphate group as acceptor	GO	3 out of 7	8.69948	upregulated	3	3.17125	0.042					downregulated	3	2.23459	0.107	downregulated	1	1.74539	0.1746	downregulated	10	4.23709	0.0144	downregulated	7	5.27112	0.0051
regulation of relaxation of muscle	GO	4 out of 7	8.68001					upregulated	1	1.93779	0.144	upregulated	1	1.44821	0.235					downregulated	4	2.93594	0.0531	downregulated	1	2.35807	0.0946
Ras guanyl-nucleotide exchange factor activity	GO	1 out of 7	8.65747	upregulated	21	3.78456	0.0227	upregulated	8	1.07343	0.3418	downregulated	28	10.7809	2.1e-05	downregulated	19	5.03191	0.0065	downregulated	49	7.71464	0.0004	downregulated	26	8.65747	0.0002
positive regulation of response to drug	GO	3 out of 7	8.62356	upregulated	1	3.59456	0.0275					downregulated	3	2.56182	0.0772	downregulated	2	2.34141	0.0962	downregulated	6	7.77706	0.0004	downregulated	2	2.15517	0.1159
nuclear chromosome segregation	GO	4 out of 7	8.61264	upregulated	12	1.97315	0.139	upregulated	16	7.85675	0.0004	upregulated	3	0.844514	0.4298	upregulated	1	0.237069	0.7889	upregulated	13	1.18922	0.3045	upregulated	2	1.10963	0.3297
translation activator activity	GO	4 out of 7	8.53971	upregulated	1	1.03509	0.3552	upregulated	1	1.63549	0.1949	upregulated	1	4.3239	0.0132					downregulated	2	1.54523	0.2133
multivesicular body organization	GO	4 out of 7	8.53667	upregulated	2	1.4617	0.2318	upregulated	3	2.65823	0.0701	upregulated	1	0.841993	0.4309	downregulated	1	0.562108	0.57	downregulated	8	5.08533	0.0062	upregulated	1	0.94848	0.3873
regulation of retrograde protein transport, ER to cytosol	GO	4 out of 7	8.53242	upregulated	2	3.28854	0.0373	upregulated	1	1.65514	0.1911	downregulated	1	0.484802	0.6158	downregulated	1	1.18975	0.3043	downregulated	4	4.17952	0.0153	downregulated	1	1.08378	0.3383
regulation of glial cell migration	GO	3 out of 7	8.50409					upregulated	2	10.6044	2.5e-05	downregulated	1	1.97628	0.1386	downregulated	1	1.99493	0.136	downregulated	1	0.794285	0.4519	downregulated	1	1.07666	0.3407
AP-type membrane coat adaptor complex	GO	2 out of 7	8.48313	downregulated	3	3.14064	0.0433	downregulated	2	1.76294	0.1715	downregulated	5	2.94464	0.0526	downregulated	1	0.208747	0.8116	downregulated	14	8.3825	0.0002	downregulated	10	8.15758	0.0003
cation-transporting ATPase complex	GO	2 out of 7	8.42379																	downregulated	4	4.61362	0.0099	downregulated	3	3.81017	0.0221
positive regulation of acrosome reaction	GO	3 out of 7	8.3801													upregulated	1	2.694	0.0676	downregulated	3	2.7055	0.0668	downregulated	1	2.9806	0.0508
regulation of protein localization to cell surface	GO	4 out of 7	8.35928	downregulated	1	0.958782	0.3834	downregulated	1	2.13907	0.1178	upregulated	1	0.319429	0.7266	upregulated	1	2.16461	0.1148	downregulated	10	5.3029	0.005	downregulated	4	3.67019	0.0255
protein localization to non-motile cilium	GO	5 out of 7	8.3185	upregulated	1	1.72586	0.178	upregulated	1	1.34072	0.2617	upregulated	1	1.46466	0.2312					downregulated	3	2.47417	0.0842	downregulated	1	1.31309	0.269
tethering complex	GO	4 out of 7	8.28677	upregulated	3	1.37028	0.254	downregulated	2	3.38401	0.0339	downregulated	4	1.01213	0.3634	upregulated	2	1.90853	0.1483	downregulated	17	5.99623	0.0025	downregulated	8	3.40787	0.0331
sperm flagellum	GO	5 out of 7	8.23457	upregulated	3	1.0456	0.3515	upregulated	4	1.9993	0.1354	upregulated	3	2.28091	0.1022	upregulated	1	2.59616	0.0746	upregulated	6	1.02437	0.359	downregulated	5	1.33697	0.2626
positive regulation of telomerase RNA localization to Cajal body	GO	3 out of 7	8.23422	upregulated	1	1.18271	0.3064													downregulated	5	4.26784	0.014	downregulated	3	2.78367	0.0618
cerebellar cortex morphogenesis	GO	3 out of 7	8.20117					upregulated	1	0.847814	0.4284	downregulated	3	2.33949	0.0964	downregulated	1	0.805845	0.4467	downregulated	9	4.58638	0.0102	downregulated	6	5.91232	0.0027
regulation of circadian sleep/wake cycle	GO	4 out of 7	8.18183	upregulated	1	1.05776	0.3472	upregulated	1	0.996537	0.3692	downregulated	1	1.05919	0.3467	downregulated	1	1.29004	0.2753	downregulated	5	3.54478	0.0289	downregulated	3	4.93198	0.0072
GTPase regulator activity	GO	4 out of 7	8.17491	upregulated	17	3.53143	0.0293	downregulated	5	0.394528	0.674	downregulated	33	6.40143	0.0017	downregulated	22	8.82888	0.0001	downregulated	55	7.82344	0.0004	downregulated	33	8.91346	0.0001	downregulated	1	3.53143	0.0293
protein transporter activity	GO	4 out of 7	8.17299	upregulated	6	1.10046	0.3327	upregulated	4	2.02161	0.1324	downregulated	3	7.65195	0.0005	downregulated	3	1.35362	0.2583	downregulated	23	8.55147	0.0002	downregulated	11	5.50502	0.0041
presynapse assembly	GO	4 out of 7	8.12998	upregulated	2	2.87671	0.0563	upregulated	1	1.22969	0.2924	upregulated	2	3.7524	0.0235	upregulated	1	3.47291	0.031	downregulated	2	1.10138	0.3324	downregulated	1	0.550672	0.5766
response to potassium ion	GO	2 out of 7	8.12221																	downregulated	5	4.0744	0.017	downregulated	3	4.04781	0.0175
protein N-terminus binding	GO	4 out of 7	8.09763	upregulated	6	2.37348	0.0932	upregulated	7	4.18569	0.0152	downregulated	12	3.7063	0.0246	downregulated	7	3.44975	0.0318	downregulated	21	6.80305	0.0011	downregulated	9	1.89146	0.1509
positive regulation of signaling receptor activity	GO	4 out of 7	8.07574					upregulated	1	0.432523	0.6489	upregulated	3	3.5691	0.0282	upregulated	1	2.04584	0.1293	downregulated	13	6.86615	0.001	upregulated	4	4.83787	0.0079
cellular response to forskolin	GO	3 out of 7	8.06268									upregulated	1	3.53374	0.0292	upregulated	1	2.24979	0.1054	downregulated	2	1.51589	0.2196	downregulated	2	2.27915	0.1024
regulation of cAMP-dependent protein kinase activity	GO	3 out of 7	8.03091	upregulated	1	2.27072	0.1032													downregulated	4	3.42924	0.0324	downregulated	2	2.33095	0.0972
mechanosensory behavior	GO	2 out of 7	8.01209	upregulated	1	2.54825	0.0782					downregulated	1	0.303783	0.738					downregulated	7	7.73542	0.0004	downregulated	4	5.76763	0.0031
entrainment of circadian clock	GO	6 out of 7	8.0074	upregulated	1	0.391579	0.676	upregulated	2	1.11751	0.3271	upregulated	2	2.90205	0.0549	upregulated	1	2.21249	0.1094	downregulated	3	0.683967	0.5046	downregulated	1	0.699808	0.4967
copulation	GO	4 out of 7	7.95574	upregulated	1	1.73426	0.1765	upregulated	1	1.38366	0.2507	upregulated	2	3.43556	0.0322	upregulated	1	2.78708	0.0616	downregulated	2	6.28366	0.0019	upregulated	1	1.38482	0.2504
polyol transport	GO	2 out of 7	7.95442	upregulated	3	5.1678	0.0057					downregulated	1	3.51201	0.0298					downregulated	4	6.29863	0.0018
RNA polymerase II, holoenzyme	GO	5 out of 7	7.921	upregulated	4	1.25269	0.2857	upregulated	5	2.47839	0.0839	downregulated	7	1.18539	0.3056	upregulated	1	3.72028	0.0242	downregulated	12	0.728517	0.4826	downregulated	5	0.926519	0.3959
positive regulation of mitochondrial membrane permeability	GO	3 out of 7	7.85165	downregulated	1	1.20197	0.3006									upregulated	1	2.80872	0.0603	downregulated	6	1.31669	0.268	downregulated	4	4.92822	0.0072
RNA stem-loop binding	GO	4 out of 7	7.7944					upregulated	1	0.591508	0.5535	downregulated	2	1.60889	0.2001	upregulated	1	4.09359	0.0167	downregulated	3	1.7721	0.17	downregulated	2	2.9461	0.0525
steroid binding	GO	1 out of 7	7.77775	upregulated	2	4.77407	0.0084	upregulated	5	2.96017	0.0518	downregulated	6	1.77801	0.169	downregulated	6	5.58034	0.0038	downregulated	10	6.98982	0.0009	downregulated	8	7.77775	0.0004
mitochondrial matrix	GO	1 out of 7	7.71672	upregulated	31	4.02122	0.0179	upregulated	22	6.25153	0.0019	upregulated	18	3.42549	0.0325	upregulated	3	0.56279	0.5696	downregulated	115	33.1187	4.1e-15	downregulated	47	10.6516	2.4e-05	upregulated	2	2.93485	0.0531
MKS complex	GO	4 out of 7	7.70039	upregulated	4	5.68424	0.0034	downregulated	1	2.39737	0.091					upregulated	1	2.17699	0.1134	downregulated	3	0.922382	0.3976	downregulated	1	1.31415	0.2687
Gemini of coiled bodies	GO	4 out of 7	7.69557	upregulated	2	2.32916	0.0974	upregulated	2	3.05651	0.0471									downregulated	2	1.54952	0.2124	downregulated	1	0.760385	0.4675
acetylcholine binding	GO	2 out of 7	7.6593																	downregulated	2	3.38148	0.034	downregulated	3	4.27782	0.0139
spinal cord development	GO	3 out of 7	7.65205	downregulated	2	1.77024	0.1703	upregulated	3	2.7882	0.0615	downregulated	8	1.92935	0.1452	downregulated	4	1.16569	0.3117	downregulated	11	5.04092	0.0065	downregulated	10	4.68822	0.0092
regulation of protein secretion	GO	3 out of 7	7.62466	downregulated	12	2.25698	0.1047	upregulated	11	2.35297	0.0951	upregulated	10	2.01992	0.1327	downregulated	19	8.91908	0.0001	downregulated	77	18.0774	1.4e-08	downregulated	45	15.7689	1.4e-07	upregulated	1	1.34104	0.2616
inner ear receptor cell development	GO	3 out of 7	7.6242	upregulated	2	0.78078	0.458	downregulated	1	1.31092	0.2696	downregulated	4	1.37577	0.2526					downregulated	7	5.20072	0.0055	downregulated	4	4.32938	0.0132
chaperone-mediated protein transport	GO	4 out of 7	7.6073	upregulated	1	0.912338	0.4016	upregulated	1	1.12365	0.3251									downregulated	4	4.25822	0.0141	downregulated	1	1.31309	0.269
establishment of tissue polarity	GO	3 out of 7	7.59807	upregulated	3	4.39979	0.0123	upregulated	2	2.68208	0.0684	upregulated	2	1.96807	0.1397					downregulated	5	3.88681	0.0205	upregulated	2	1.45187	0.2341
negative regulation of transcription from RNA polymerase II promoter in response to stress	GO	4 out of 7	7.55736	upregulated	1	2.30464	0.0998	upregulated	2	3.48906	0.0305	upregulated	1	2.3214	0.0981	downregulated	1	1.75591	0.1727	upregulated	2	3.7782	0.0229	downregulated	3	4.97636	0.0069
protein C-terminus binding	GO	2 out of 7	7.50256	upregulated	11	1.58274	0.2054	upregulated	9	2.42623	0.0884	downregulated	15	2.72273	0.0657	downregulated	9	1.43767	0.2375	downregulated	45	16.0287	1.1e-07	downregulated	26	12.5377	3.6e-06	upregulated	2	2.4575	0.0856
glycerolipid metabolic process	GO	2 out of 7	7.48117	downregulated	7	3.3094	0.0365	downregulated	6	0.928732	0.3951	downregulated	29	8.29226	0.0003	downregulated	17	3.60253	0.0273	downregulated	78	7.82003	0.0004	downregulated	39	7.50181	0.0006
positive regulation of gonad development	GO	3 out of 7	7.45178	upregulated	1	2.64586	0.0709													downregulated	2	3.74438	0.0237	downregulated	1	1.06153	0.3459
thiolester hydrolase activity	GO	4 out of 7	7.44173	upregulated	2	1.29163	0.2748	upregulated	1	0.964281	0.3813	downregulated	2	1.73878	0.1757					downregulated	8	3.52542	0.0294	downregulated	5	3.39918	0.0334
regulation of mitochondrial membrane permeability involved in apoptotic process	GO	4 out of 7	7.41687	downregulated	1	1.21785	0.2959	upregulated	1	0.616279	0.54					upregulated	1	2.82719	0.0592	downregulated	5	1.58782	0.2044	downregulated	3	3.60342	0.0272
oxidoreductase activity, acting on the CH-NH group of donors	GO	5 out of 7	7.39391	downregulated	3	4.09535	0.0166	upregulated	1	1.50328	0.2224	upregulated	2	3.40491	0.0332	upregulated	1	1.9565	0.1414	downregulated	2	1.93599	0.1443	downregulated	1	2.68858	0.068
positive regulation of mitochondrial membrane permeability involved in apoptotic process	GO	3 out of 7	7.36663	downregulated	1	1.48679	0.2261									upregulated	1	3.13284	0.0436	downregulated	4	1.26744	0.2816	downregulated	3	4.45315	0.0116
positive regulation of membrane permeability	GO	3 out of 7	7.35471	downregulated	1	1.17125	0.31									upregulated	1	2.77282	0.0625	downregulated	6	1.21387	0.297	downregulated	4	4.53928	0.0107
nuclear envelope	GO	1 out of 7	7.32635	upregulated	29	3.07776	0.0461	upregulated	21	2.80842	0.0603	downregulated	37	6.06532	0.0023	downregulated	27	6.45673	0.0016	downregulated	88	8.35039	0.0002	downregulated	42	7.32635	0.0007
regulation of cell maturation	GO	3 out of 7	7.31592	downregulated	1	1.15344	0.3155	upregulated	1	3.79504	0.0225	downregulated	2	1.42573	0.2403					downregulated	6	4.61918	0.0099	downregulated	2	1.48087	0.2274
cellular response to increased oxygen levels	GO	2 out of 7	7.29182					upregulated	1	3.42815	0.0324									downregulated	3	3.71607	0.0243	downregulated	3	3.86367	0.021
preribosome	GO	3 out of 7	7.27383	upregulated	2	0.371569	0.6897	upregulated	4	2.63338	0.0718									downregulated	20	3.63842	0.0263	downregulated	9	3.26384	0.0382
endoplasmic reticulum unfolded protein response	GO	4 out of 7	7.22572	downregulated	2	3.25963	0.0384	upregulated	5	1.19545	0.3026	upregulated	5	2.20809	0.1099	downregulated	3	0.706283	0.4935	downregulated	20	2.62875	0.0722	downregulated	12	5.15936	0.0057
ATPase complex	GO	4 out of 7	7.21969	upregulated	5	0.981017	0.3749	upregulated	5	2.27508	0.1028	downregulated	9	0.943842	0.3891	downregulated	2	0.435458	0.647	downregulated	16	2.5482	0.0782	downregulated	9	2.79468	0.0611
meiotic chromosome segregation	GO	5 out of 7	7.21843	upregulated	3	0.532562	0.5871	upregulated	8	6.35258	0.0017	upregulated	2	1.39589	0.2476	upregulated	1	0.773667	0.4613	downregulated	8	0.075916	0.9269	upregulated	1	1.91218	0.1478
negative regulation of dendrite development	GO	3 out of 7	7.19943	downregulated	1	1.15534	0.315	upregulated	1	3.08419	0.0458	downregulated	1	1.07748	0.3405	downregulated	3	3.37311	0.0343	downregulated	8	6.98435	0.0009	downregulated	3	2.73682	0.0648
Golgi stack	GO	1 out of 7	7.1817	upregulated	5	1.93358	0.1446	upregulated	4	1.07241	0.3422	upregulated	5	2.83178	0.0589	downregulated	5	1.13697	0.3208	downregulated	27	5.88218	0.0028	downregulated	17	7.1817	0.0008
macrophage migration	GO	2 out of 7	7.14461					upregulated	3	9.05601	0.0001					downregulated	1	2.02081	0.1325	downregulated	2	2.59189	0.0749	upregulated	1	2.48249	0.0835
positive regulation of anion transport	GO	4 out of 7	7.11433	upregulated	3	1.14051	0.3197	upregulated	3	1.50695	0.2216	downregulated	4	3.13943	0.0433	downregulated	3	3.47825	0.0309	downregulated	8	5.81395	0.003	downregulated	6	5.2706	0.0051
cell projection membrane	GO	1 out of 7	7.11088	downregulated	11	4.98013	0.0069	downregulated	7	1.10533	0.3311	downregulated	31	6.54669	0.0014	downregulated	16	4.18763	0.0152	downregulated	66	16.7267	5.4e-08	downregulated	42	18.9329	6e-09	upregulated	1	1.54896	0.2125
neuron projection fasciculation	GO	2 out of 7	7.08572	downregulated	1	2.20648	0.1101	downregulated	1	1.46325	0.2315	downregulated	2	3.64803	0.026	downregulated	2	3.17265	0.0419	downregulated	11	13.7242	1.1e-06	downregulated	3	3.85193	0.0212
positive regulation of mitochondrial outer membrane permeabilization involved in apoptotic signaling pathway	GO	2 out of 7	7.07243	downregulated	3	2.88359	0.0559	downregulated	1	1.14754	0.3174	downregulated	4	2.5308	0.0796	downregulated	1	0.5116	0.5995	downregulated	8	5.43081	0.0044	downregulated	8	8.71515	0.0002
oxidoreductase activity, acting on the aldehyde or oxo group of donors, NAD or NADP as acceptor	GO	5 out of 7	7.03978	upregulated	1	0.595596	0.5512	upregulated	1	0.650907	0.5216	upregulated	1	0.9022	0.4057					downregulated	7	3.29956	0.0369	downregulated	3	1.59152	0.2036
protein insertion into membrane	GO	2 out of 7	7.03911	downregulated	2	2.46942	0.0846					downregulated	1	0.712202	0.4906	downregulated	1	0.749606	0.4726	downregulated	7	4.36256	0.0127	downregulated	4	4.13837	0.0159
positive regulation of telomere capping	GO	4 out of 7	7.02843	upregulated	2	3.25254	0.0387	upregulated	1	1.5617	0.2098	downregulated	1	1.76773	0.1707					downregulated	5	3.24265	0.0391	downregulated	1	0.739278	0.4775
organic acid transmembrane transport	GO	4 out of 7	7.02431	upregulated	8	2.30245	0.1	upregulated	3	1.92174	0.1464	downregulated	15	5.17431	0.0057	downregulated	7	3.72656	0.0241	downregulated	28	5.77985	0.0031	downregulated	15	3.19878	0.0408	upregulated	1	2.45195	0.0861
carboxylic acid transmembrane transport	GO	4 out of 7	7.02431	upregulated	8	2.30245	0.1	upregulated	3	1.92174	0.1464	downregulated	15	5.17431	0.0057	downregulated	7	3.72656	0.0241	downregulated	28	5.77985	0.0031	downregulated	15	3.19878	0.0408	upregulated	1	2.45195	0.0861
intramolecular oxidoreductase activity	GO	4 out of 7	7.01094	downregulated	1	1.30421	0.2714	upregulated	2	1.74368	0.1749	upregulated	2	1.25655	0.2846	downregulated	1	1.76015	0.172	downregulated	10	3.72381	0.0241	downregulated	5	3.35125	0.035
negative regulation of proteasomal protein catabolic process	GO	5 out of 7	6.99892	upregulated	5	2.98658	0.0505	upregulated	2	0.978999	0.3757	upregulated	3	1.41594	0.2427	upregulated	1	1.88422	0.1519	downregulated	11	2.08272	0.1246	upregulated	1	2.34953	0.0954
positive regulation of protein localization to chromosome, telomeric region	GO	2 out of 7	6.98248																	downregulated	5	4.91758	0.0073	downregulated	2	2.0649	0.1268
cellular response to virus	GO	4 out of 7	6.87684	downregulated	1	1.01151	0.3637	upregulated	2	2.03579	0.1306	upregulated	1	4.51094	0.011	downregulated	1	0.446955	0.6396	downregulated	3	1.51863	0.219	downregulated	1	0.269939	0.7634
response to temperature stimulus	GO	4 out of 7	6.85394	upregulated	10	3.25624	0.0385	upregulated	5	1.3548	0.258	upregulated	4	0.505447	0.6032	downregulated	5	0.752921	0.471	downregulated	31	8.14338	0.0003	upregulated	8	5.65301	0.0035
metaphase plate congression	GO	2 out of 7	6.82688	upregulated	5	3.65812	0.0258	upregulated	5	3.89	0.0204	downregulated	2	0.459301	0.6317	downregulated	1	0.261945	0.7696	downregulated	9	2.63016	0.0721
negative regulation of cellular response to insulin stimulus	GO	4 out of 7	6.81031	downregulated	3	2.95331	0.0522	upregulated	2	0.802745	0.4481	upregulated	1	0.460389	0.631					downregulated	5	1.13962	0.3199	downregulated	6	7.36087	0.0006
response to heat	GO	4 out of 7	6.79499	upregulated	8	3.37471	0.0342	upregulated	5	2.48225	0.0836	upregulated	3	1.13367	0.3219	downregulated	4	1.16463	0.312	downregulated	16	4.83008	0.008	upregulated	5	3.86109	0.021
single fertilization	GO	4 out of 7	6.79474	upregulated	3	1.06448	0.3449					upregulated	5	2.96842	0.0514	upregulated	3	2.91258	0.0543	downregulated	17	2.06959	0.1262	downregulated	9	3.77531	0.0229	upregulated	2	3.92604	0.0197
mitochondrial outer membrane permeabilization involved in programmed cell death	GO	3 out of 7	6.7882	downregulated	1	1.30306	0.2717									upregulated	1	2.92543	0.0536	downregulated	5	1.09156	0.3357	downregulated	3	4.07427	0.017
mitotic metaphase plate congression	GO	2 out of 7	6.78636	upregulated	4	3.07924	0.046	upregulated	5	4.72923	0.0088	downregulated	2	0.658793	0.5175	downregulated	1	0.363311	0.6954	downregulated	9	3.73263	0.0239
positive regulation of establishment of protein localization to telomere	GO	2 out of 7	6.76831																	downregulated	4	4.43995	0.0118	downregulated	2	2.32836	0.0975
positive regulation of ruffle assembly	GO	3 out of 7	6.76495	upregulated	1	1.26181	0.2831	upregulated	1	6.91158	0.001	downregulated	2	1.61918	0.1981	downregulated	1	2.4485	0.0864	downregulated	6	4.43516	0.0119	upregulated	1	1.77593	0.1693
oligosaccharyltransferase complex	GO	3 out of 7	6.75096	upregulated	1	4.19681	0.015	upregulated	1	1.63549	0.1949					downregulated	1	1.36651	0.255	downregulated	1	2.28518	0.1018
calcium import into the mitochondrion	GO	3 out of 7	6.74771	upregulated	1	1.48845	0.2257	downregulated	2	5.04578	0.0064									downregulated	6	9.24351	9.7e-05	downregulated	1	1.06153	0.3459
dopamine binding	GO	3 out of 7	6.74596									upregulated	1	2.6608	0.0699					downregulated	2	2.66987	0.0693	downregulated	1	1.41529	0.2429
cellular response to topologically incorrect protein	GO	4 out of 7	6.7361	downregulated	3	2.60425	0.074	upregulated	6	0.832202	0.4351	upregulated	6	1.88486	0.1519	downregulated	3	0.367132	0.6927	downregulated	26	2.01604	0.1332	downregulated	15	4.97438	0.0069
cytoplasmic sequestering of protein	GO	4 out of 7	6.71641	upregulated	1	1.18161	0.3068	downregulated	1	1.71129	0.1806	upregulated	3	4.06516	0.0172	downregulated	1	1.0561	0.3478	downregulated	6	3.46244	0.0314	downregulated	1	0.77458	0.4609
hormone receptor binding	GO	5 out of 7	6.70884	upregulated	6	0.480356	0.6186	upregulated	5	0.303061	0.7386	downregulated	16	3.18753	0.0413	upregulated	5	5.45249	0.0043	downregulated	32	1.42706	0.24	downregulated	14	2.23341	0.1072
negative regulation of blood pressure	GO	4 out of 7	6.67423					upregulated	3	1.77029	0.1703	upregulated	3	2.41051	0.0898	downregulated	4	2.48401	0.0834	downregulated	6	2.90783	0.0546	downregulated	3	2.06961	0.1262
lipoprotein biosynthetic process	GO	4 out of 7	6.67021	upregulated	8	6.35099	0.0017	upregulated	4	1.84038	0.1588	downregulated	4	2.10605	0.1217	downregulated	5	1.87599	0.1532	downregulated	14	1.20208	0.3006	downregulated	6	1.25879	0.284
alcohol catabolic process	GO	4 out of 7	6.66861	upregulated	1	0.362506	0.6959	upregulated	2	1.96052	0.1408	downregulated	2	0.834998	0.4339	upregulated	1	2.34328	0.096	upregulated	4	1.32187	0.2666	downregulated	5	4.15917	0.0156
regulation of telomerase RNA localization to Cajal body	GO	3 out of 7	6.60811	upregulated	1	0.996307	0.3692													downregulated	5	3.20455	0.0406	downregulated	3	2.40726	0.0901
calcium-mediated signaling using intracellular calcium source	GO	2 out of 7	6.60758					downregulated	1	4.48865	0.0112	upregulated	3	6.43621	0.0016					downregulated	7	8.19	0.0003	upregulated	2	3.52997	0.0293
positive regulation of peptidyl-lysine acetylation	GO	5 out of 7	6.60482	upregulated	2	0.862335	0.4222	upregulated	1	2.10401	0.122	upregulated	1	0.646998	0.5236					downregulated	3	1.25232	0.2858	downregulated	2	1.73915	0.1757
macroautophagy	GO	4 out of 7	6.57995	upregulated	4	0.372246	0.6892	upregulated	8	1.51717	0.2193	downregulated	12	3.34046	0.0354	downregulated	6	1.53252	0.216	downregulated	27	5.278	0.0051	downregulated	16	5.53396	0.004	upregulated	1	1.24844	0.287
small-subunit processome	GO	4 out of 7	6.57765	upregulated	2	0.977713	0.3762	upregulated	2	2.18709	0.1122									downregulated	9	1.3768	0.2524	downregulated	4	2.03605	0.1305
magnesium ion transmembrane transport	GO	3 out of 7	6.57138	upregulated	4	8.07262	0.0003	upregulated	1	1.02771	0.3578	downregulated	2	1.97975	0.1381					downregulated	3	2.99618	0.05					upregulated	1	3.54539	0.0289
deacetylase activity	GO	4 out of 7	6.5669	upregulated	6	4.71406	0.009	upregulated	2	1.35551	0.2578	downregulated	3	0.266921	0.7657	upregulated	2	2.23877	0.1066	downregulated	6	0.566504	0.5675	upregulated	2	2.04102	0.1299
ciliary basal body	GO	4 out of 7	6.53613	upregulated	12	5.57714	0.0038	downregulated	2	1.9001	0.1496	upregulated	4	1.91191	0.1478	upregulated	1	1.06667	0.3442	upregulated	15	4.77914	0.0084	downregulated	13	4.65966	0.0095
regulation of TORC1 signaling	GO	4 out of 7	6.53531	upregulated	3	4.90055	0.0074	upregulated	3	5.60003	0.0037	upregulated	1	1.2601	0.2836	downregulated	4	5.1257	0.0059	downregulated	4	0.765034	0.4653	downregulated	1	0.395401	0.6734
positive regulation of fertilization	GO	3 out of 7	6.53379									downregulated	1	1.42455	0.2406	upregulated	1	2.60213	0.0741	downregulated	3	2.46029	0.0854	downregulated	1	2.89592	0.0552
histone methyltransferase complex	GO	5 out of 7	6.52167	upregulated	6	2.0346	0.1307	upregulated	4	1.59428	0.2031	upregulated	1	0.611329	0.5426	upregulated	1	1.12385	0.325	upregulated	11	0.401985	0.669	downregulated	7	1.55959	0.2102
female gamete generation	GO	2 out of 7	6.50517	downregulated	3	0.805043	0.4471	downregulated	1	0.188159	0.8285	upregulated	2	4.70372	0.0091	upregulated	1	3.46225	0.0314	upregulated	10	1.96642	0.14	upregulated	5	0.667592	0.5129
ciliary transition zone	GO	5 out of 7	6.4998	upregulated	8	4.22209	0.0147	downregulated	1	1.12728	0.3239	upregulated	2	0.637738	0.5285	upregulated	1	0.94213	0.3898	downregulated	13	1.01476	0.3625	downregulated	3	0.810361	0.4447
intramolecular oxidoreductase activity, transposing C=C bonds	GO	3 out of 7	6.49579									upregulated	1	1.96962	0.1395	upregulated	1	2.74587	0.0642	downregulated	3	1.78029	0.1686
angiotensin-activated signaling pathway	GO	2 out of 7	6.49281					upregulated	1	3.64125	0.0262									downregulated	2	2.85156	0.0578
spermatid development	GO	4 out of 7	6.49033	upregulated	9	2.80964	0.0602	upregulated	5	1.39982	0.2466	upregulated	6	3.36647	0.0345	downregulated	7	3.1313	0.0437	downregulated	24	2.42899	0.0881	downregulated	10	2.0457	0.1293
negative regulation of proteolysis involved in cellular protein catabolic process	GO	3 out of 7	6.49016	downregulated	1	2.20505	0.1102	upregulated	2	0.526919	0.5904	downregulated	4	1.30203	0.272	downregulated	5	1.69849	0.183	downregulated	13	2.28507	0.1018	downregulated	4	3.67817	0.0253
endothelial cell development	GO	1 out of 7	6.4814	downregulated	2	4.25188	0.0142	upregulated	3	2.44784	0.0865	downregulated	6	2.98385	0.0506	downregulated	3	1.91954	0.1467	upregulated	11	10.3239	3.3e-05	downregulated	5	6.4814	0.0015
ventricular cardiac muscle cell action potential	GO	2 out of 7	6.4083					downregulated	2	7.47103	0.0006					downregulated	1	2.31225	0.099	downregulated	6	5.91212	0.0027	downregulated	6	10.2795	3.4e-05
protein deacetylase activity	GO	5 out of 7	6.40425	upregulated	3	2.37522	0.093	upregulated	2	1.68019	0.1863	downregulated	3	0.37496	0.6873	upregulated	1	1.78614	0.1676	downregulated	4	0.384658	0.6807	downregulated	2	0.552996	0.5752
signal transduction involved in G2 DNA damage checkpoint	GO	5 out of 7	6.3871	upregulated	1	0.532666	0.587	upregulated	2	2.0932	0.1233	upregulated	1	2.207	0.11	downregulated	2	3.47854	0.0309	downregulated	4	1.40596	0.2451	downregulated	3	3.62682	0.0266
lamellipodium organization	GO	4 out of 7	6.38533	upregulated	2	2.59445	0.0747	upregulated	4	5.88241	0.0028	upregulated	2	4.03232	0.0177	downregulated	4	4.15292	0.0157	upregulated	12	9.33215	8.9e-05	downregulated	8	7.36122	0.0006
racemase and epimerase activity	GO	3 out of 7	6.37934	upregulated	2	2.39788	0.0909	upregulated	2	3.2905	0.0372									upregulated	1	0.970899	0.3787	downregulated	2	1.66186	0.1898
small ribosomal subunit	GO	5 out of 7	6.36154	upregulated	3	0.483162	0.6168	downregulated	1	0.596508	0.5507	upregulated	3	2.63538	0.0717	upregulated	1	1.63212	0.1955	downregulated	10	0.212005	0.809	downregulated	8	1.99537	0.136
transferase activity, transferring hexosyl groups	GO	4 out of 7	6.33566	upregulated	6	3.22903	0.0396	upregulated	9	2.79401	0.0612	upregulated	9	5.83418	0.0029	downregulated	8	1.40262	0.246	downregulated	27	2.57511	0.0761	upregulated	6	3.72804	0.024	upregulated	1	2.96602	0.0515
regulation of type B pancreatic cell proliferation	GO	2 out of 7	6.3268																	downregulated	2	3.67076	0.0255	downregulated	2	2.65604	0.0702
intrinsic component of Golgi membrane	GO	4 out of 7	6.32466	downregulated	1	0.715143	0.4891	upregulated	4	4.47092	0.0114	upregulated	3	3.55387	0.0286	downregulated	5	5.93008	0.0027	downregulated	13	2.36507	0.0939	downregulated	5	2.58002	0.0758
extrinsic component of cytoplasmic side of plasma membrane	GO	3 out of 7	6.31306	upregulated	5	5.36068	0.0047	upregulated	1	1.59624	0.2027	downregulated	5	2.17389	0.1137	downregulated	9	4.83322	0.008	downregulated	18	11.8596	7.1e-06	downregulated	11	6.36326	0.0017
heme metabolic process	GO	5 out of 7	6.30534	upregulated	1	1.10419	0.3315	upregulated	2	1.98431	0.1375	downregulated	3	2.62736	0.0723	upregulated	1	2.05697	0.1278	downregulated	5	1.75445	0.173	downregulated	3	2.03279	0.131
signal sequence binding	GO	1 out of 7	6.28414	upregulated	3	0.643358	0.5255	downregulated	1	0.520566	0.5942	upregulated	3	3.33685	0.0355	downregulated	1	0.189167	0.8276	downregulated	13	4.83971	0.0079	downregulated	8	6.28414	0.0019
cullin family protein binding	GO	4 out of 7	6.27701	upregulated	2	1.35756	0.2573					upregulated	2	2.4694	0.0846					downregulated	5	1.82273	0.1616	downregulated	1	0.627312	0.534
positive regulation of exosomal secretion	GO	3 out of 7	6.26651					upregulated	1	1.09176	0.3356					downregulated	1	1.59724	0.2025	downregulated	5	4.20452	0.0149	downregulated	2	2.56747	0.0767
regulation of protein targeting to mitochondrion	GO	4 out of 7	6.23328	upregulated	3	2.23012	0.1075					upregulated	1	0.742565	0.4759	downregulated	2	0.788117	0.4547	downregulated	7	1.84655	0.1578	downregulated	5	2.20216	0.1106
SNAP receptor activity	GO	1 out of 7	6.22416	downregulated	1	1.43696	0.2376	upregulated	3	1.93857	0.1439	downregulated	2	0.392755	0.6752	downregulated	1	0.586911	0.556	downregulated	8	3.49589	0.0303	downregulated	3	6.22416	0.002
protein localization to cell junction	GO	3 out of 7	6.21747	upregulated	1	2.18494	0.1125					downregulated	1	0.662583	0.5155					downregulated	2	2.28568	0.1017	downregulated	1	2.40943	0.0899
Arp2/3 protein complex	GO	1 out of 7	6.19203									upregulated	1	1.17199	0.3097	upregulated	1	2.71908	0.0659	downregulated	5	6.9878	0.0009	downregulated	4	6.19203	0.002
sialylation	GO	4 out of 7	6.16129	upregulated	1	2.10356	0.122	upregulated	1	2.26227	0.1041	downregulated	4	2.85892	0.0573	downregulated	2	5.12149	0.006	downregulated	4	3.50165	0.0301	downregulated	4	6.27421	0.0019
negative regulation of oxidative stress-induced neuron death	GO	2 out of 7	6.15576									downregulated	2	2.13083	0.1187					downregulated	4	5.055	0.0064	downregulated	3	3.23159	0.0395
phosphatidylinositol-3,5-bisphosphate 3-phosphatase activity	GO	3 out of 7	6.14546	upregulated	1	0.890173	0.4106					downregulated	2	3.30216	0.0368	downregulated	1	1.12759	0.3238	downregulated	5	3.59302	0.0275	downregulated	4	6.09202	0.0023
regulation of response to oxidative stress	GO	2 out of 7	6.14443	downregulated	5	2.59392	0.0747	upregulated	4	6.4114	0.0016	downregulated	5	2.40057	0.0907	downregulated	2	1.14241	0.319	downregulated	19	4.53552	0.0107	downregulated	7	5.86993	0.0028
heart development	GO	3 out of 7	6.14222	upregulated	31	5.79126	0.0031	downregulated	8	2.42716	0.0883	downregulated	30	4.71577	0.009	upregulated	6	2.58398	0.0755	upregulated	78	22.2685	2.1e-10	downregulated	40	5.84481	0.0029	upregulated	2	0.934902	0.3926
9+2 motile cilium	GO	4 out of 7	6.13389	upregulated	5	2.5572	0.0775	upregulated	4	1.84541	0.158	upregulated	3	2.14445	0.1171	upregulated	1	2.53783	0.079	upregulated	9	1.29236	0.2746	upregulated	3	1.65863	0.1904
establishment of cell polarity	GO	3 out of 7	6.10488	upregulated	5	2.65315	0.0704	downregulated	3	2.86664	0.0569	downregulated	15	7.21225	0.0007	downregulated	9	4.90094	0.0074	downregulated	25	7.5221	0.0005	downregulated	18	10.9095	1.8e-05
ciliary base	GO	3 out of 7	6.10082	upregulated	3	2.51867	0.0806	upregulated	2	4.11644	0.0163	downregulated	1	0.158041	0.8538	downregulated	1	0.606264	0.5454	downregulated	6	1.68568	0.1853	upregulated	2	1.45566	0.2332
filamentous actin	GO	5 out of 7	6.09872	upregulated	1	1.39345	0.2482	upregulated	2	1.90862	0.1483	upregulated	1	1.75386	0.1731	upregulated	1	1.37801	0.2521	upregulated	5	3.75232	0.0235	downregulated	3	3.4171	0.0328
clathrin adaptor complex	GO	2 out of 7	6.09272	downregulated	3	4.10961	0.0164	downregulated	2	2.37523	0.093	downregulated	4	3.71293	0.0244	downregulated	1	0.384084	0.6811	downregulated	11	8.52941	0.0002	downregulated	8	8.14518	0.0003
proteasome regulatory particle, base subcomplex	GO	3 out of 7	6.0839					upregulated	1	1.87662	0.1531									downregulated	3	2.37071	0.0934	downregulated	2	1.83657	0.1594
long-chain fatty acid import	GO	3 out of 7	6.06614					upregulated	2	3.02022	0.0488	upregulated	2	4.40345	0.0122					downregulated	3	3.26251	0.0383	upregulated	1	4.62004	0.0099
divalent inorganic cation transmembrane transporter activity	GO	4 out of 7	6.06539	upregulated	2	2.71531	0.0662	upregulated	1	3.96607	0.0189	downregulated	1	0.237517	0.7886					downregulated	3	1.42724	0.24	downregulated	1	1.53268	0.216	upregulated	1	3.33841	0.0355
positive regulation of ATP biosynthetic process	GO	3 out of 7	6.01342	upregulated	2	3.18315	0.0415					downregulated	4	3.60539	0.0272	downregulated	2	2.50913	0.0813	downregulated	5	4.16478	0.0155	downregulated	2	4.78002	0.0084
regulation of cellular response to oxidative stress	GO	2 out of 7	5.99796	downregulated	5	3.08298	0.0458	upregulated	4	6.88209	0.001	downregulated	5	2.52191	0.0803	downregulated	2	1.26165	0.2832	downregulated	16	4.02304	0.0179	downregulated	7	5.98241	0.0025
response to topologically incorrect protein	GO	4 out of 7	5.97235	downregulated	4	3.66935	0.0255	upregulated	8	1.02894	0.3574	upregulated	7	1.90601	0.1487	downregulated	4	0.212141	0.8089	downregulated	35	2.24374	0.1061	downregulated	17	4.67514	0.0093
p53 binding	GO	1 out of 7	5.97233					downregulated	1	0.586329	0.5564	downregulated	6	2.92639	0.0536	downregulated	3	1.18274	0.3064	downregulated	12	2.49434	0.0826	downregulated	9	5.97233	0.0025
intronic transcription regulatory region sequence-specific DNA binding	GO	3 out of 7	5.96843	upregulated	2	2.48764	0.0831	upregulated	2	3.12785	0.0438					upregulated	1	3.37486	0.0342	upregulated	1	3.02193	0.0487
presynaptic membrane assembly	GO	3 out of 7	5.9657	upregulated	1	1.34549	0.2604					upregulated	2	4.36282	0.0127	upregulated	1	3.79028	0.0226	downregulated	2	1.69954	0.1828	downregulated	1	0.829918	0.4361
cyclin-dependent protein serine/threonine kinase regulator activity	GO	3 out of 7	5.96456	downregulated	1	0.748042	0.4733	upregulated	3	4.92517	0.0073	upregulated	3	2.72832	0.0653	downregulated	1	1.62845	0.1962	downregulated	8	1.58713	0.2045	downregulated	4	1.82875	0.1606
oxidoreductase activity, acting on the CH-NH2 group of donors	GO	2 out of 7	5.95606					upregulated	2	3.58696	0.0277	upregulated	3	5.71697	0.0033					upregulated	2	2.56918	0.0766	upregulated	2	3.34786	0.0352
positive regulation of ATP metabolic process	GO	3 out of 7	5.94272	upregulated	2	3.06368	0.0467					downregulated	4	3.09405	0.0453	downregulated	2	2.30249	0.1	downregulated	6	3.71774	0.0243	downregulated	2	4.55783	0.0105
retinol binding	GO	4 out of 7	5.93814	upregulated	1	2.54825	0.0782					upregulated	1	1.77097	0.1702	upregulated	1	2.41131	0.0897	downregulated	3	2.33632	0.0967	upregulated	1	3.12871	0.0438
negative regulation of cell growth	GO	4 out of 7	5.92477	upregulated	9	1.12654	0.3242	downregulated	4	4.32186	0.0133	downregulated	18	8.32571	0.0002	upregulated	4	2.62848	0.0722	downregulated	30	7.38957	0.0006	downregulated	19	7.42776	0.0006
nuclear membrane	GO	4 out of 7	5.92195	upregulated	18	1.96268	0.1405	upregulated	13	3.81862	0.022	downregulated	27	5.62857	0.0036	downregulated	15	5.64009	0.0036	downregulated	59	7.74095	0.0004	downregulated	25	3.66836	0.0255
ER overload response	GO	4 out of 7	5.91468	upregulated	1	0.854083	0.4257	upregulated	2	2.71787	0.066	upregulated	1	2.72444	0.0656	downregulated	1	1.16589	0.3116	upregulated	1	1.28291	0.2772	downregulated	1	0.784181	0.4565
outer dynein arm assembly	GO	4 out of 7	5.91143					upregulated	1	1.69763	0.1831	upregulated	1	2.44748	0.0865	upregulated	1	3.64268	0.0262	upregulated	3	2.28688	0.1016	downregulated	1	0.41052	0.6633
regulation of mitochondrial outer membrane permeabilization involved in apoptotic signaling pathway	GO	2 out of 7	5.91021	downregulated	3	2.50738	0.0815	downregulated	1	1.01902	0.3609	downregulated	4	2.37864	0.0927	downregulated	1	0.41849	0.658	downregulated	9	5.14301	0.0058	downregulated	8	7.09073	0.0008
vitamin transmembrane transporter activity	GO	3 out of 7	5.90586	upregulated	1	1.77468	0.1695	downregulated	1	1.06991	0.343	downregulated	1	0.259254	0.7716					downregulated	5	3.01364	0.0491	downregulated	2	2.4467	0.0866
voltage-gated potassium channel activity involved in cardiac muscle cell action potential repolarization	GO	2 out of 7	5.88123									downregulated	1	2.30464	0.0998					downregulated	4	4.31405	0.0134	downregulated	2	3.87182	0.0208
cerebellar cortex formation	GO	2 out of 7	5.87156									downregulated	3	3.17317	0.0419					downregulated	6	3.4931	0.0304	downregulated	4	5.55163	0.0039
hydrolase activity, acting on carbon-nitrogen (but not peptide) bonds	GO	4 out of 7	5.86421	upregulated	7	3.66738	0.0255	upregulated	7	3.68171	0.0252	downregulated	13	3.33056	0.0358	downregulated	5	1.87621	0.1532	downregulated	17	1.42015	0.2417	downregulated	12	2.30173	0.1001
cellular response to extracellular stimulus	GO	4 out of 7	5.84411	downregulated	4	3.80864	0.0222	upregulated	6	4.15948	0.0156	upregulated	13	6.79454	0.0011	downregulated	15	7.20812	0.0007	downregulated	32	6.01282	0.0024	downregulated	20	3.30279	0.0368	upregulated	1	3.40875	0.0331
negative regulation of cell size	GO	2 out of 7	5.84356									upregulated	1	1.94523	0.143	upregulated	1	3.89833	0.0203	downregulated	1	1.2118	0.2977
negative regulation of long-term synaptic potentiation	GO	3 out of 7	5.82578	upregulated	1	0.841194	0.4312	upregulated	2	4.41087	0.0121	downregulated	1	0.825688	0.4379					upregulated	1	3.0683	0.0465	downregulated	1	4.4677	0.0115
negative regulation of receptor binding	GO	4 out of 7	5.81057									upregulated	1	1.01294	0.3631	upregulated	1	3.25039	0.0388	downregulated	1	0.825291	0.4381	downregulated	1	0.721948	0.4858
regulation of microtubule motor activity	GO	3 out of 7	5.80484	upregulated	1	2.04237	0.1297					downregulated	1	3.11745	0.0443	downregulated	1	3.0683	0.0465	downregulated	5	6.50841	0.0015	downregulated	3	3.43981	0.0321
extrinsic component of organelle membrane	GO	3 out of 7	5.8025	upregulated	2	0.757129	0.469	downregulated	1	0.636359	0.5292	upregulated	2	1.44926	0.2347	downregulated	3	2.02804	0.1316	upregulated	2	3.96485	0.019	downregulated	7	6.2605	0.0019
Golgi-associated vesicle	GO	1 out of 7	5.80106	upregulated	9	4.8122	0.0081	downregulated	3	0.926358	0.396	downregulated	20	12.3701	4.2e-06	downregulated	15	16.3625	7.8e-08	upregulated	25	13.5193	1.3e-06	downregulated	14	5.80106	0.003
cellular response to fibroblast growth factor stimulus	GO	4 out of 7	5.78612	upregulated	9	4.87639	0.0076	upregulated	5	1.64546	0.1929	upregulated	7	4.35131	0.0129	downregulated	4	2.85379	0.0576	upregulated	14	7.45101	0.0006	downregulated	13	5.21776	0.0054
response to dopamine	GO	4 out of 7	5.77744	upregulated	1	1.82578	0.1611	upregulated	1	4.00095	0.0183	downregulated	2	2.25905	0.1044	downregulated	1	1.26347	0.2827	downregulated	2	1.23522	0.2908	downregulated	2	2.238	0.1067
cellular response to dopamine	GO	4 out of 7	5.77744	upregulated	1	1.82578	0.1611	upregulated	1	4.00095	0.0183	downregulated	2	2.25905	0.1044	downregulated	1	1.26347	0.2827	downregulated	2	1.23522	0.2908	downregulated	2	2.238	0.1067
chromosome segregation	GO	2 out of 7	5.77238	upregulated	14	1.6821	0.186	upregulated	19	7.64645	0.0005	downregulated	19	1.79309	0.1664	downregulated	9	0.841171	0.4312	upregulated	16	0.985436	0.3733	upregulated	2	0.921917	0.3978
regulation of protein K63-linked ubiquitination	GO	3 out of 7	5.76384									upregulated	1	3.33633	0.0356	downregulated	1	1.35907	0.2569	downregulated	2	2.68216	0.0684	downregulated	1	1.10442	0.3314
ESCRT complex disassembly	GO	3 out of 7	5.75489					upregulated	1	1.40026	0.2465					downregulated	1	1.51241	0.2204	downregulated	4	4.61721	0.0099	downregulated	1	1.24984	0.2866
ESCRT III complex disassembly	GO	3 out of 7	5.75489					upregulated	1	1.40026	0.2465					downregulated	1	1.51241	0.2204	downregulated	4	4.61721	0.0099	downregulated	1	1.24984	0.2866
glycerol ether metabolic process	GO	2 out of 7	5.74565	downregulated	1	1.82736	0.1608	upregulated	2	5.23617	0.0053	upregulated	1	2.33684	0.0966					downregulated	4	3.44181	0.032
protein phosphatase activator activity	GO	3 out of 7	5.72616	downregulated	1	1.92416	0.146	upregulated	1	1.09917	0.3331	downregulated	1	1.57215	0.2076	downregulated	1	5.18504	0.0056	downregulated	6	6.34595	0.0018	downregulated	4	5.39024	0.0046
negative regulation of oxidative stress-induced intrinsic apoptotic signaling pathway	GO	3 out of 7	5.68476	upregulated	3	3.47557	0.0309					upregulated	1	1.09659	0.334					upregulated	2	2.05392	0.1282	downregulated	3	3.16652	0.0422
aminoacyl-tRNA synthetase multienzyme complex	GO	3 out of 7	5.67361					upregulated	2	3.48906	0.0305	downregulated	1	0.65912	0.5173					downregulated	3	1.83977	0.1589	downregulated	1	1.0039	0.3664
viral budding via host ESCRT complex	GO	4 out of 7	5.66792	upregulated	1	1.18004	0.3073	upregulated	2	2.36984	0.0935	upregulated	1	1.2624	0.283					downregulated	3	0.855641	0.425
calcium channel regulator activity	GO	1 out of 7	5.66642	upregulated	5	6.83381	0.0011	upregulated	2	3.41807	0.0328	downregulated	3	0.730145	0.4818					downregulated	17	15.2162	2.5e-07	downregulated	7	5.66642	0.0035
protein phosphatase inhibitor activity	GO	1 out of 7	5.65908	upregulated	3	3.57453	0.028	upregulated	1	1.27936	0.2782									downregulated	12	8.77015	0.0002	downregulated	6	5.65908	0.0035
RNA phosphodiester bond hydrolysis, endonucleolytic	GO	3 out of 7	5.6381	upregulated	3	1.36276	0.256	upregulated	8	12.3579	4.3e-06	downregulated	6	5.22201	0.0054	downregulated	4	5.59698	0.0037	upregulated	5	2.27374	0.1029	downregulated	8	2.73646	0.0648
ketone body metabolic process	GO	1 out of 7	5.63118																	downregulated	5	6.25257	0.0019	downregulated	3	5.63118	0.0036
regulation of DNA-templated transcription, initiation	GO	4 out of 7	5.61999	upregulated	6	5.39852	0.0045	upregulated	1	0.93469	0.3927	downregulated	3	0.762778	0.4664	downregulated	3	2.48889	0.083	downregulated	7	1.96104	0.1407	downregulated	2	0.577413	0.5613
mitochondrial small ribosomal subunit	GO	1 out of 7	5.61731	upregulated	2	1.17779	0.308	downregulated	1	1.40404	0.2456	upregulated	1	0.880227	0.4147					downregulated	9	3.5207	0.0296	downregulated	6	5.61731	0.0036
establishment of chromosome localization	GO	3 out of 7	5.60813	upregulated	5	2.293	0.101	upregulated	6	3.53638	0.0291	downregulated	3	1.27852	0.2784	downregulated	2	1.23617	0.2905	downregulated	12	2.29344	0.1009
lipid catabolic process	GO	3 out of 7	5.60477	downregulated	4	3.89207	0.0204	upregulated	14	4.60687	0.01	downregulated	16	5.72851	0.0033	downregulated	11	2.7245	0.0656	downregulated	47	6.15549	0.0021	downregulated	25	7.18749	0.0008
cellular response to leukemia inhibitory factor	GO	4 out of 7	5.57449	upregulated	8	2.29851	0.1004	upregulated	6	1.82561	0.1611	downregulated	10	5.98978	0.0025	downregulated	8	4.8961	0.0075	downregulated	19	5.77975	0.0031	downregulated	13	6.5565	0.0014
regulation of phospholipase C activity	GO	4 out of 7	5.51528	upregulated	2	2.69594	0.0675	upregulated	2	6.26747	0.0019	downregulated	3	2.06016	0.1274	upregulated	1	1.55327	0.2116	upregulated	8	7.11831	0.0008	downregulated	2	4.17707	0.0153
macromolecule depalmitoylation	GO	4 out of 7	5.50843	upregulated	2	3.1494	0.0429	upregulated	1	1.94202	0.1434	downregulated	2	3.7076	0.0245					downregulated	1	0.497792	0.6079	downregulated	3	3.62682	0.0266
palmitoyl hydrolase activity	GO	4 out of 7	5.50843	upregulated	2	3.1494	0.0429	upregulated	1	1.94202	0.1434	downregulated	2	3.7076	0.0245					downregulated	1	0.497792	0.6079	downregulated	3	3.62682	0.0266
negative regulation of protein localization to cell surface	GO	3 out of 7	5.50439	downregulated	1	1.75511	0.1729	upregulated	2	3.46663	0.0312					downregulated	1	1.06029	0.3464	downregulated	3	2.37964	0.0926	downregulated	1	2.47353	0.0843
morphogenesis of a branching structure	GO	1 out of 7	5.48916	downregulated	9	2.91359	0.0543	upregulated	2	0.845273	0.4294	downregulated	14	6.84089	0.0011	upregulated	1	0.617426	0.5393	upregulated	26	7.57738	0.0005	downregulated	8	5.48916	0.0041	upregulated	1	0.962872	0.3818
mitochondrial outer membrane translocase complex	GO	1 out of 7	5.48237	upregulated	1	1.16271	0.3126													downregulated	5	7.42071	0.0006	downregulated	3	5.48237	0.0042
sperm midpiece	GO	4 out of 7	5.37189	upregulated	1	2.496	0.0824	upregulated	1	1.2697	0.2809	upregulated	1	1.37649	0.2525					downregulated	2	0.229703	0.7948
response to pain	GO	2 out of 7	5.34698					upregulated	1	3.11637	0.0443	downregulated	3	0.930392	0.3944	downregulated	2	1.9185	0.1468	downregulated	6	9.23844	9.7e-05	upregulated	2	4.15894	0.0156
positive regulation of DNA-templated transcription, initiation	GO	4 out of 7	5.33396	upregulated	3	3.57605	0.028	upregulated	1	1.19592	0.3024	downregulated	2	0.718395	0.4875	downregulated	2	2.09642	0.1229	downregulated	5	2.43227	0.0878	downregulated	2	0.944533	0.3889
response to epinephrine	GO	3 out of 7	5.31301	upregulated	1	1.13216	0.3223	downregulated	1	4.71073	0.009	downregulated	1	1.07359	0.3418					downregulated	7	9.26166	9.5e-05	downregulated	1	0.703507	0.4948
phosphatidylglycerol acyl-chain remodeling	GO	4 out of 7	5.31218	upregulated	1	0.834992	0.4339	downregulated	1	1.37323	0.2533	upregulated	1	1.86356	0.1551					downregulated	3	2.64155	0.0713	downregulated	1	1.34531	0.2605
regulation of centrosome cycle	GO	4 out of 7	5.31133	upregulated	5	2.84501	0.0581	upregulated	4	3.89559	0.0203	downregulated	7	3.09263	0.0454	downregulated	2	0.526589	0.5906	downregulated	9	1.05468	0.3483	downregulated	4	1.13526	0.3213
ubiquitin-specific protease binding	GO	5 out of 7	5.30532	upregulated	1	0.898419	0.4072	upregulated	1	0.684635	0.5043	upregulated	1	1.41306	0.2434	upregulated	1	3.31433	0.0364	downregulated	5	2.43112	0.0879	upregulated	1	3.43624	0.0322
regulation of protein localization to centrosome	GO	2 out of 7	5.29744					upregulated	1	3.46834	0.0312	downregulated	1	1.19508	0.3027					upregulated	2	1.55334	0.2115	downregulated	3	4.57753	0.0103
RNA phosphodiester bond hydrolysis, exonucleolytic	GO	2 out of 7	5.28952	upregulated	4	2.58724	0.0752	upregulated	5	5.4251	0.0044	downregulated	4	1.08002	0.3396	downregulated	3	1.92153	0.1464	upregulated	3	0.0853632	0.9182	upregulated	2	0.715928	0.4887
cellular modified amino acid catabolic process	GO	3 out of 7	5.28454					upregulated	2	1.93163	0.1449	upregulated	1	2.51252	0.0811					upregulated	4	2.511	0.0812	downregulated	2	0.840385	0.4315
startle response	GO	1 out of 7	5.25862	upregulated	1	2.02734	0.1317					upregulated	3	4.00904	0.0182	upregulated	1	2.87072	0.0567	downregulated	11	18.6205	8.2e-09	downregulated	5	5.25862	0.0052
tetrahydrofolate interconversion	GO	2 out of 7	5.25859					upregulated	1	6.40112	0.0017	downregulated	2	1.18189	0.3067					downregulated	1	0.0393614	0.9614
regulation of IRE1-mediated unfolded protein response	GO	3 out of 7	5.22952									upregulated	2	3.54792	0.0288					downregulated	3	0.817501	0.4415	downregulated	1	0.864096	0.4214
protein localization to cytoskeleton	GO	4 out of 7	5.20213	upregulated	4	3.11437	0.0444	upregulated	1	0.300507	0.7404	downregulated	5	4.27759	0.0139	downregulated	2	1.46004	0.2322	downregulated	5	3.17565	0.0418	downregulated	5	4.34923	0.0129
negative regulation of secretion	GO	3 out of 7	5.1751	upregulated	7	0.732296	0.4808	upregulated	6	9.12706	0.0001	downregulated	14	4.1665	0.0155	downregulated	11	4.39237	0.0124	downregulated	39	14.7548	3.9e-07	upregulated	12	10.8802	1.9e-05
porphyrin-containing compound metabolic process	GO	4 out of 7	5.14824	upregulated	1	1.00178	0.3672	upregulated	3	3.00814	0.0494	downregulated	3	2.4083	0.09	upregulated	1	1.93816	0.144	downregulated	6	1.8233	0.1615	downregulated	3	1.60845	0.2002
ribonucleoprotein complex binding	GO	4 out of 7	5.13604	upregulated	4	0.166067	0.847	upregulated	6	2.3094	0.0993	upregulated	8	5.30198	0.005	upregulated	2	2.47047	0.0845	upregulated	9	0.823853	0.4387	upregulated	3	1.92368	0.1461	upregulated	1	2.36434	0.094
peptide transmembrane transporter activity	GO	3 out of 7	5.13064	upregulated	1	0.272256	0.7617					downregulated	2	6.04108	0.0024					downregulated	9	6.26967	0.0019	downregulated	5	4.62979	0.0098
intermediate filament	GO	1 out of 7	5.11398	downregulated	2	0.938055	0.3914	downregulated	1	1.02395	0.3592	upregulated	2	1.64129	0.1937	upregulated	3	2.50164	0.082	downregulated	9	11.0873	1.5e-05	downregulated	9	5.11398	0.006
muscle cell fate commitment	GO	2 out of 7	5.10514	upregulated	1	4.45979	0.0116					downregulated	1	0.661563	0.516					downregulated	1	1.30691	0.2707
epithelial cell development	GO	1 out of 7	5.10002	downregulated	7	3.61725	0.0269	upregulated	5	4.0839	0.0168	downregulated	17	2.32495	0.0978	upregulated	3	1.82974	0.1605	upregulated	31	13.2885	1.7e-06	downregulated	10	5.10002	0.0061
protein acetyltransferase complex	GO	3 out of 7	5.0853	upregulated	7	2.25375	0.105	upregulated	5	2.23726	0.1068	downregulated	7	1.69277	0.184	downregulated	1	0.0215252	0.9787	upregulated	8	0.401985	0.669	downregulated	9	2.71058	0.0665
neurotransmitter:sodium symporter activity	GO	1 out of 7	5.08442	upregulated	2	5.30702	0.005					upregulated	1	7.09367	0.0008					downregulated	5	3.89555	0.0203	downregulated	4	5.08442	0.0062
enzyme inhibitor activity	GO	1 out of 7	5.08433	upregulated	12	1.21415	0.297	upregulated	10	2.07821	0.1252	downregulated	14	1.43463	0.2382	downregulated	10	2.89975	0.055	upregulated	43	12.6108	3.3e-06	downregulated	28	5.08433	0.0062
positive regulation of stem cell proliferation	GO	4 out of 7	5.07348	downregulated	3	3.07031	0.0464	upregulated	3	4.96259	0.007	upregulated	1	0.794101	0.452	upregulated	1	1.4557	0.2332	upregulated	6	4.34227	0.013	downregulated	2	2.20336	0.1104
energy reserve metabolic process	GO	1 out of 7	5.05631	upregulated	2	2.76	0.0633	downregulated	1	0.404286	0.6675	upregulated	2	1.60326	0.2012	downregulated	4	1.97295	0.139	downregulated	11	4.86172	0.0077	downregulated	9	5.05631	0.0064
cerebellar Purkinje cell layer development	GO	2 out of 7	5.01901									downregulated	3	2.66928	0.0693					downregulated	7	4.74437	0.0087	downregulated	3	2.94392	0.0527
translation elongation factor activity	GO	1 out of 7	4.95963					upregulated	1	2.75619	0.0635	upregulated	3	3.63122	0.0265					downregulated	4	2.40916	0.0899	downregulated	4	4.95963	0.007
ribosomal large subunit biogenesis	GO	4 out of 7	4.94438	upregulated	1	0.0606725	0.9411	upregulated	4	1.41084	0.2439	downregulated	2	0.196236	0.8218	downregulated	2	0.566125	0.5677	downregulated	17	2.86195	0.0572	downregulated	7	1.37328	0.2533
lymph vessel morphogenesis	GO	3 out of 7	4.93508	downregulated	2	5.19265	0.0056	downregulated	2	2.75498	0.0636	upregulated	2	4.84304	0.0079					downregulated	5	4.91056	0.0074	downregulated	3	3.12909	0.0438
response to amino acid starvation	GO	3 out of 7	4.92683	upregulated	4	3.73865	0.0238	upregulated	3	4.38953	0.0124	upregulated	3	3.04125	0.0478	downregulated	3	2.38168	0.0924	upregulated	5	1.92499	0.1459	downregulated	3	1.10532	0.3311
regulation of cell-cell adhesion mediated by cadherin	GO	2 out of 7	4.92124	upregulated	1	3.11204	0.0445					downregulated	2	2.34742	0.0956					downregulated	2	4.15662	0.0157
chloride ion binding	GO	3 out of 7	4.91953									upregulated	1	1.75797	0.1724	downregulated	2	2.80038	0.0608	downregulated	4	4.05658	0.0173	downregulated	2	1.90536	0.1488
negative regulation of response to endoplasmic reticulum stress	GO	3 out of 7	4.91857	upregulated	4	2.97988	0.0508	downregulated	2	1.63218	0.1955	upregulated	2	1.56112	0.2099	downregulated	1	0.274903	0.7596	downregulated	7	2.3046	0.0998	downregulated	5	2.28465	0.1018
mitochondrial large ribosomal subunit	GO	1 out of 7	4.90108	upregulated	7	5.87458	0.0028	upregulated	3	1.49855	0.2235	upregulated	3	2.38972	0.0917	upregulated	1	1.26619	0.2819	downregulated	17	7.42845	0.0006	downregulated	8	4.90108	0.0074
polysaccharide metabolic process	GO	1 out of 7	4.86781	upregulated	2	1.0038	0.3665	downregulated	2	1.11472	0.328	upregulated	3	2.40883	0.0899	downregulated	7	5.14756	0.0058	upregulated	8	3.3804	0.034	downregulated	10	4.86781	0.0077
monosaccharide transmembrane transport	GO	4 out of 7	4.83916	upregulated	1	2.21947	0.1087	downregulated	1	1.86069	0.1556	upregulated	1	1.41708	0.2424	downregulated	2	3.11637	0.0443	downregulated	8	3.81172	0.0221	downregulated	3	2.36796	0.0937
microtubule end	GO	2 out of 7	4.8179									downregulated	4	3.65352	0.0259	downregulated	3	2.90005	0.055	downregulated	7	4.84068	0.0079	downregulated	6	6.53079	0.0015
positive regulation of protein polyubiquitination	GO	5 out of 7	4.80525	upregulated	1	0.687945	0.5026	upregulated	2	2.73629	0.0648	upregulated	1	1.09637	0.3341	downregulated	1	1.13382	0.3218	downregulated	1	0.390658	0.6766	downregulated	1	1.02781	0.3578
transcription corepressor activity	GO	1 out of 7	4.78404	upregulated	15	1.61408	0.1991	upregulated	4	1.82962	0.1605	upregulated	6	0.93237	0.3936	upregulated	2	1.34834	0.2597	upregulated	37	17.8413	1.8e-08	downregulated	22	4.78404	0.0084	upregulated	1	0.775752	0.4604
ER to Golgi vesicle-mediated transport	GO	3 out of 7	4.78116	downregulated	5	1.88174	0.1523	upregulated	10	1.57209	0.2076	downregulated	14	1.59868	0.2022	upregulated	1	1.17355	0.3093	downregulated	50	5.48293	0.0042	downregulated	21	5.51594	0.004
Lys63-specific deubiquitinase activity	GO	5 out of 7	4.76464	upregulated	2	1.65042	0.192	upregulated	1	0.730734	0.4816	upregulated	1	1.47054	0.2298					downregulated	1	0.067997	0.9343	downregulated	1	0.844956	0.4296
bone resorption	GO	3 out of 7	4.75979	downregulated	1	1.01683	0.3617	upregulated	1	1.2236	0.2942	downregulated	1	1.16989	0.3104	downregulated	1	1.29699	0.2734	downregulated	3	3.84228	0.0214	downregulated	3	3.17762	0.0417
positive regulation of protein acetylation	GO	4 out of 7	4.73717	downregulated	1	2.00947	0.1341	upregulated	3	3.0957	0.0452	upregulated	1	0.488267	0.6137					downregulated	5	1.6352	0.1949	downregulated	2	1.52747	0.2171
oxidoreductase activity, acting on the CH-OH group of donors, NAD or NADP as acceptor	GO	3 out of 7	4.73517	downregulated	3	2.26817	0.1035	upregulated	6	2.76263	0.0631	upregulated	3	2.2643	0.1039	downregulated	10	7.4019	0.0006	downregulated	22	6.21111	0.002	downregulated	12	5.43151	0.0044
polyol metabolic process	GO	3 out of 7	4.73292	downregulated	4	4.66815	0.0094	upregulated	2	1.99457	0.1361	downregulated	9	6.89577	0.001	downregulated	5	3.76264	0.0232	downregulated	27	10.1229	4e-05	downregulated	13	7.94206	0.0004
photoreceptor cell cilium	GO	3 out of 7	4.71057	upregulated	5	2.26633	0.1037	upregulated	4	1.12749	0.3238	downregulated	4	0.944994	0.3887	downregulated	1	0.25262	0.7768	downregulated	19	5.08778	0.0062	upregulated	4	2.57341	0.0763
regulation of neuroblast proliferation	GO	4 out of 7	4.709	downregulated	2	3.48201	0.0307	upregulated	3	6.04625	0.0024	upregulated	1	1.11932	0.3265	upregulated	1	1.83164	0.1602	upregulated	5	3.26963	0.038	downregulated	2	2.46343	0.0851
negative regulation of neurogenesis	GO	3 out of 7	4.70695	downregulated	11	4.18434	0.0152	upregulated	8	4.65412	0.0095	downregulated	37	25.6023	7.6e-12	downregulated	24	8.63094	0.0002	downregulated	64	22.3851	1.9e-10	downregulated	37	16.0853	1e-07
trans-Golgi network	GO	1 out of 7	4.68976	upregulated	9	4.59267	0.0101	upregulated	8	1.51281	0.2203	downregulated	29	18.5294	9e-09	downregulated	19	15.1259	2.7e-07	downregulated	55	22.1802	2.3e-10	downregulated	27	9.20337	0.0001	upregulated	2	4.51361	0.011
mitochondrial outer membrane permeabilization	GO	2 out of 7	4.68077	downregulated	1	1.61172	0.1995													downregulated	4	1.38792	0.2496	downregulated	3	4.90457	0.0074
spindle	GO	1 out of 7	4.67229	upregulated	27	6.16406	0.0021	upregulated	20	6.456	0.0016	downregulated	28	3.79928	0.0224	downregulated	16	2.33411	0.0969	downregulated	65	5.12838	0.0059	downregulated	30	5.38655	0.0046	upregulated	1	0.714262	0.4896
thyroid hormone receptor binding	GO	3 out of 7	4.65197					upregulated	1	0.704884	0.4942	downregulated	3	0.716968	0.4882	upregulated	2	4.32163	0.0133	upregulated	3	0.434416	0.6476	downregulated	2	0.776842	0.4599
sulfur compound metabolic process	GO	3 out of 7	4.63956	downregulated	6	0.593761	0.5522	upregulated	12	2.08874	0.1238	upregulated	13	3.95851	0.0191	downregulated	18	4.21332	0.0148	downregulated	59	7.25149	0.0007	downregulated	27	3.39938	0.0334
glutathione derivative biosynthetic process	GO	4 out of 7	4.63262	upregulated	2	2.62671	0.0723	upregulated	1	0.944496	0.3889					upregulated	1	2.17699	0.1134	upregulated	2	2.02207	0.1324	downregulated	2	0.906491	0.4039
regulation of ATP metabolic process	GO	3 out of 7	4.62624	upregulated	5	2.43838	0.0873	downregulated	2	4.19264	0.0151	downregulated	4	1.56501	0.2091	downregulated	2	1.3057	0.271	downregulated	13	4.45495	0.0116	downregulated	6	4.79626	0.0083
9+0 non-motile cilium	GO	3 out of 7	4.60839	upregulated	5	2.24536	0.1059	upregulated	4	1.11977	0.3264	downregulated	4	0.930417	0.3944	downregulated	1	0.248565	0.7799	downregulated	19	4.97836	0.0069	upregulated	4	2.55612	0.0776
glutathione metabolic process	GO	4 out of 7	4.59707	upregulated	1	0.685731	0.5037	upregulated	1	1.17719	0.3081	upregulated	1	1.80838	0.1639					downregulated	7	1.30664	0.2707	downregulated	3	0.925772	0.3962
pigment granule organization	GO	3 out of 7	4.58936	downregulated	1	0.848355	0.4281					upregulated	2	2.10306	0.1221					downregulated	5	1.84335	0.1583	downregulated	2	1.49131	0.2251
cyclin binding	GO	5 out of 7	4.5556	upregulated	2	1.38623	0.25	downregulated	2	2.4621	0.0853	upregulated	2	1.16517	0.3119	upregulated	1	1.81494	0.1628	downregulated	5	1.74716	0.1743	downregulated	2	0.904197	0.4049
regulation of skeletal muscle cell differentiation	GO	3 out of 7	4.54864	upregulated	3	4.1564	0.0157	downregulated	1	1.48715	0.226	downregulated	2	2.33424	0.0969					downregulated	2	2.68626	0.0681	downregulated	1	1.52738	0.2171
signaling adaptor activity	GO	3 out of 7	4.5411	upregulated	4	2.28876	0.1014	upregulated	2	0.361599	0.6966	downregulated	8	3.79447	0.0225	downregulated	3	0.463561	0.629	upregulated	9	2.41451	0.0894	downregulated	11	6.14878	0.0021
regulation of autophagosome assembly	GO	4 out of 7	4.50743	upregulated	3	3.21536	0.0401	upregulated	3	3.07498	0.0462	downregulated	3	2.45923	0.0855	downregulated	4	4.614	0.0099	downregulated	5	0.619105	0.5384	downregulated	6	4.67121	0.0094
telomeric loop disassembly	GO	2 out of 7	4.50367	upregulated	1	1.55757	0.2106	upregulated	1	2.9461	0.0525
morphogenesis of an epithelium	GO	1 out of 7	4.46854	upregulated	20	2.35578	0.0948	downregulated	8	2.98227	0.0507	downregulated	33	8.33405	0.0002	downregulated	17	5.30459	0.005	upregulated	56	13.843	9.7e-07	downregulated	25	4.46854	0.0115	upregulated	1	0.419019	0.6577
adenylate cyclase activity	GO	1 out of 7	4.45852													upregulated	1	2.59428	0.0747	downregulated	2	1.60039	0.2018	downregulated	3	4.45852	0.0116
cleavage furrow	GO	3 out of 7	4.4559	upregulated	5	2.22752	0.1078	upregulated	5	2.57113	0.0764	downregulated	3	1.63355	0.1952	downregulated	3	2.03888	0.1302	upregulated	8	1.74112	0.1753	downregulated	7	3.43726	0.0322
smooth muscle contraction	GO	3 out of 7	4.43264	upregulated	2	3.91866	0.0199	upregulated	2	2.37934	0.0926	downregulated	5	4.46977	0.0114	downregulated	1	3.56204	0.0284	downregulated	11	12.3377	4.4e-06	downregulated	7	6.16645	0.0021
phosphate ion binding	GO	1 out of 7	4.40212									downregulated	1	0.889286	0.4109					downregulated	1	3.31742	0.0362	downregulated	1	5.29141	0.005
organelle inheritance	GO	2 out of 7	4.38317					upregulated	1	1.25154	0.2861									downregulated	3	3.13163	0.0436
oxidoreductase activity, acting on the CH-CH group of donors	GO	3 out of 7	4.36165	upregulated	3	2.40377	0.0904	upregulated	4	8.20249	0.0003	upregulated	3	2.14042	0.1176	downregulated	4	5.45383	0.0043	upregulated	7	2.09316	0.1233	upregulated	2	0.838042	0.4326
neuron recognition	GO	2 out of 7	4.35126	upregulated	3	3.12445	0.044	downregulated	1	0.973977	0.3776	downregulated	2	3.07031	0.0464	downregulated	2	2.08523	0.1243	downregulated	20	21.674	3.9e-10	downregulated	8	7.35632	0.0006
determination of bilateral symmetry	GO	3 out of 7	4.33959	upregulated	12	8.32668	0.0002	downregulated	2	2.07053	0.1261	downregulated	6	3.88499	0.0205	upregulated	2	1.34103	0.2616	downregulated	17	4.44493	0.0117	upregulated	6	3.81752	0.022
regulation of viral release from host cell	GO	5 out of 7	4.33722	upregulated	2	0.902306	0.4056	upregulated	4	4.9931	0.0068	upregulated	1	0.684074	0.5046					downregulated	4	0.177574	0.8373	downregulated	1	0.278913	0.7566	upregulated	1	2.69875	0.0673
mRNA splice site selection	GO	1 out of 7	4.31054	downregulated	2	1.79124	0.1668	downregulated	1	3.66358	0.0256	downregulated	6	2.23636	0.1068					downregulated	4	2.77021	0.0626	downregulated	5	4.31054	0.0134
regulation of vascular permeability	GO	4 out of 7	4.28927	upregulated	1	3.28643	0.0374	upregulated	1	0.546181	0.5792	upregulated	4	6.22483	0.002	upregulated	1	2.00878	0.1342	upregulated	4	4.24597	0.0143	upregulated	2	3.53098	0.0293
peroxisomal membrane	GO	1 out of 7	4.27044	upregulated	5	3.83412	0.0216	upregulated	5	4.17302	0.0154	upregulated	6	5.41453	0.0045	downregulated	2	1.44811	0.235	downregulated	16	8.01934	0.0003	downregulated	7	4.27044	0.014
lysosomal transport	GO	3 out of 7	4.2694	upregulated	7	3.66588	0.0256	upregulated	6	2.19684	0.1112	upregulated	5	3.89314	0.0204	downregulated	7	5.07146	0.0063	downregulated	18	2.51906	0.0805	downregulated	10	3.25088	0.0387
regulation of RNA polymerase II transcriptional preinitiation complex assembly	GO	3 out of 7	4.25361	upregulated	3	2.37031	0.0935	upregulated	1	1.73587	0.1762	downregulated	1	0.337971	0.7132					downregulated	5	1.23762	0.2901	upregulated	1	0.752206	0.4713
CD4-positive, alpha-beta T cell activation	GO	2 out of 7	4.24504	downregulated	1	0.590184	0.5542	upregulated	1	4.65365	0.0095	downregulated	2	0.366688	0.693					upregulated	4	2.17023	0.1142	downregulated	2	2.71849	0.066
actin filament bundle	GO	5 out of 7	4.19645	upregulated	3	0.809917	0.4449	upregulated	6	5.9551	0.0026	upregulated	3	3.47305	0.031	upregulated	1	2.71399	0.0663	upregulated	15	10.3694	3.1e-05	downregulated	5	1.61378	0.1991
ATP-dependent helicase activity	GO	3 out of 7	4.19157	upregulated	1	0.0800098	0.9231	upregulated	6	4.89125	0.0075	downregulated	4	0.331808	0.7176	downregulated	3	1.07495	0.3413	downregulated	9	0.0596954	0.9421	downregulated	4	0.627065	0.5342
interferon-gamma production	GO	2 out of 7	4.18641					upregulated	1	1.14723	0.3175									upregulated	2	1.36798	0.2546	downregulated	1	4.40716	0.0122
regulation of trophoblast cell migration	GO	2 out of 7	4.1661	upregulated	1	2.28655	0.1016					downregulated	1	1.54613	0.2131					downregulated	3	3.42568	0.0325
peroxisome	GO	1 out of 7	4.15808	upregulated	9	3.08068	0.0459	upregulated	8	3.2511	0.0387	upregulated	10	5.9138	0.0027	downregulated	3	0.7916	0.4531	downregulated	26	4.59956	0.0101	downregulated	11	4.15808	0.0156
regulation of cellular senescence	GO	3 out of 7	4.14904	upregulated	2	1.25671	0.2846	upregulated	3	2.45911	0.0855	downregulated	4	1.71808	0.1794	downregulated	2	0.863967	0.4215	upregulated	3	2.5258	0.08	downregulated	3	3.01526	0.049
microtubule associated complex	GO	1 out of 7	4.12839	downregulated	4	2.28662	0.1016	upregulated	10	6.45948	0.0016	downregulated	20	8.03539	0.0003	downregulated	11	4.78375	0.0084	downregulated	35	5.29629	0.005	downregulated	18	5.37682	0.0046	upregulated	1	1.24844	0.287
excretion	GO	2 out of 7	4.12362					downregulated	1	2.31471	0.0988	upregulated	4	4.88257	0.0076	downregulated	2	1.6762	0.1871	downregulated	3	1.01886	0.361	downregulated	3	3.23196	0.0395
positive regulation of cell cycle G2/M phase transition	GO	4 out of 7	4.1183	upregulated	2	1.24734	0.2873	upregulated	2	1.31424	0.2687	downregulated	3	1.42368	0.2408					downregulated	7	2.00172	0.1351	downregulated	2	0.978675	0.3758
positive regulation of cellular response to insulin stimulus	GO	3 out of 7	4.08351	upregulated	4	5.17716	0.0056	downregulated	1	0.758518	0.4684	upregulated	1	0.511846	0.5994					upregulated	6	4.19696	0.015	downregulated	2	3.34998	0.0351
regulation of glucose import in response to insulin stimulus	GO	3 out of 7	4.08051	upregulated	4	6.27718	0.0019	downregulated	1	0.948803	0.3872	upregulated	1	0.677477	0.5079					upregulated	6	5.66077	0.0035	downregulated	2	3.73542	0.0239
motor activity	GO	1 out of 7	4.07402	downregulated	4	4.75969	0.0086	upregulated	5	0.872814	0.4178	downregulated	15	3.68764	0.025	downregulated	8	3.55722	0.0285	downregulated	21	3.02905	0.0484	downregulated	16	4.07402	0.017	upregulated	1	1.30316	0.2717
ER membrane protein complex	GO	3 out of 7	4.07192					upregulated	1	1.4387	0.2372	upregulated	1	1.49302	0.2247					downregulated	4	2.68181	0.0684	upregulated	1	1.54162	0.214
platelet morphogenesis	GO	3 out of 7	4.0585	upregulated	1	4.10551	0.0165	upregulated	1	1.32285	0.2664	downregulated	3	1.80659	0.1642					downregulated	1	1.01348	0.363	upregulated	1	0.576741	0.5617
mitochondrial tRNA processing	GO	3 out of 7	4.05638					upregulated	1	1.94202	0.1434					downregulated	1	1.31589	0.2682	downregulated	3	2.42929	0.0881	downregulated	1	1.00096	0.3675
cellular response to drug	GO	3 out of 7	4.00875	downregulated	9	6.14537	0.0021	upregulated	15	6.29059	0.0019	upregulated	13	4.71689	0.0089	downregulated	21	5.69058	0.0034	downregulated	52	9.84554	5.3e-05	downregulated	27	4.83722	0.0079
negative regulation of endoplasmic reticulum unfolded protein response	GO	3 out of 7	3.93664					upregulated	1	1.10346	0.3317	upregulated	2	3.86668	0.0209	downregulated	1	1.16589	0.3116	upregulated	1	1.28291	0.2772	downregulated	1	1.41529	0.2429
nucleoid	GO	3 out of 7	3.92429	downregulated	1	0.697924	0.4976	upregulated	2	1.3941	0.2481	downregulated	1	0.824053	0.4387	downregulated	2	1.1818	0.3067	downregulated	11	4.15163	0.0157	downregulated	3	1.08234	0.3388
adenylate cyclase-activating adrenergic receptor signaling pathway	GO	3 out of 7	3.92159					upregulated	1	0.919202	0.3988	downregulated	1	0.26833	0.7647					downregulated	4	1.47597	0.2286	downregulated	2	1.79475	0.1662
adrenergic receptor signaling pathway	GO	3 out of 7	3.92159					upregulated	1	0.919202	0.3988	downregulated	1	0.26833	0.7647					downregulated	4	1.47597	0.2286	downregulated	2	1.79475	0.1662
hormone activity	GO	1 out of 7	3.91395	downregulated	3	4.14288	0.0159	downregulated	1	0.329124	0.7196	upregulated	2	2.22814	0.1077	upregulated	1	1.21252	0.2974	downregulated	14	12.3517	4.3e-06	downregulated	7	3.91395	0.02
response to unfolded protein	GO	3 out of 7	3.87311	downregulated	3	4.10234	0.0165	upregulated	8	1.55515	0.2112	upregulated	6	1.68415	0.1856	downregulated	4	0.315496	0.7294	downregulated	30	2.24022	0.1064	downregulated	16	5.05164	0.0064
endolysosome membrane	GO	3 out of 7	3.85868					upregulated	1	3.6731	0.0254	downregulated	1	1.1291	0.3233	downregulated	4	9.39934	8.3e-05	downregulated	6	7.21563	0.0007	downregulated	3	3.49839	0.0302
phosphatase activator activity	GO	3 out of 7	3.84152	downregulated	1	1.76773	0.1707	upregulated	1	0.963407	0.3816	downregulated	1	1.39016	0.249	downregulated	1	4.978	0.0069	downregulated	6	5.03434	0.0065	downregulated	4	4.58951	0.0102
regulation of macrophage apoptotic process	GO	2 out of 7	3.83943	upregulated	1	4.79467	0.0083													downregulated	2	1.88855	0.1513	upregulated	1	2.84379	0.0582
cerebellum morphogenesis	GO	2 out of 7	3.83166					upregulated	1	0.700765	0.4962	downregulated	4	2.65211	0.0705	downregulated	1	0.698636	0.4973	downregulated	9	3.60831	0.0271	downregulated	7	6.48164	0.0015
positive regulation of glucose import in response to insulin stimulus	GO	3 out of 7	3.8146	upregulated	4	7.22134	0.0007	downregulated	1	1.11492	0.3279	upregulated	1	0.826625	0.4375					upregulated	6	7.06294	0.0009	downregulated	1	3.9445	0.0194
mitotic spindle	GO	3 out of 7	3.77475	upregulated	10	4.51682	0.0109	downregulated	2	2.96936	0.0513	downregulated	11	2.8124	0.0601	downregulated	6	1.51375	0.2201	downregulated	17	6.25786	0.0019	downregulated	8	1.95569	0.1415	upregulated	1	1.66011	0.1901
one-carbon metabolic process	GO	1 out of 7	3.75638					upregulated	2	5.52658	0.004	downregulated	3	1.17936	0.3075	downregulated	1	0.590842	0.5539	upregulated	2	1.8931	0.1506
nitrogen cycle metabolic process	GO	2 out of 7	3.73232																	downregulated	1	1.03527	0.3551	downregulated	2	2.69705	0.0674
cytochrome-c oxidase activity	GO	1 out of 7	3.72389	upregulated	1	1.46654	0.2307	upregulated	2	2.30734	0.0995	upregulated	1	0.93659	0.392					downregulated	7	5.0836	0.0062	downregulated	4	3.72389	0.0241
regulation of removal of superoxide radicals	GO	2 out of 7	3.69257	upregulated	1	1.76009	0.172	upregulated	1	2.67324	0.069									upregulated	1	0.740759	0.4768
small nucleolar ribonucleoprotein complex	GO	1 out of 7	3.66573	upregulated	2	2.47179	0.0844	upregulated	1	0.955886	0.3845	upregulated	1	1.35157	0.2588					downregulated	7	4.0744	0.017	downregulated	4	3.66573	0.0256
muscle fiber development	GO	3 out of 7	3.66283	upregulated	1	3.47432	0.031	upregulated	2	2.12043	0.12	downregulated	3	4.90936	0.0074	downregulated	1	3.99856	0.0183	downregulated	9	3.938	0.0195	downregulated	6	5.15843	0.0058
positive regulation of urine volume	GO	3 out of 7	3.66043					upregulated	1	4.09752	0.0166	upregulated	1	1.29928	0.2727	upregulated	1	2.8767	0.0563	upregulated	1	1.20985	0.2982	upregulated	2	3.40321	0.0333
kidney development	GO	1 out of 7	3.62374	upregulated	12	5.54457	0.0039	downregulated	5	2.70693	0.0667	downregulated	18	3.34716	0.0352	downregulated	14	8.06371	0.0003	upregulated	43	24.667	1.9e-11	downregulated	13	3.62374	0.0267
caveola	GO	1 out of 7	3.62271	upregulated	3	2.21929	0.1087	upregulated	5	9.77661	5.7e-05	upregulated	6	4.8049	0.0082	downregulated	4	2.02212	0.1324	upregulated	16	8.27745	0.0003	downregulated	7	3.62271	0.0267
protein disulfide oxidoreductase activity	GO	3 out of 7	3.61916									upregulated	1	0.860062	0.4231					downregulated	4	2.01968	0.1327	downregulated	1	0.739412	0.4774
nucleotide-activated protein kinase complex	GO	4 out of 7	3.61638	upregulated	1	1.48101	0.2274	upregulated	1	0.799311	0.4496	downregulated	1	0.459953	0.6313					downregulated	1	0.930664	0.3943	downregulated	1	0.865349	0.4209
positive regulation of cellular senescence	GO	2 out of 7	3.61335	upregulated	1	1.89575	0.1502					downregulated	1	0.702052	0.4956					upregulated	1	2.04095	0.1299	downregulated	2	2.41965	0.089
nerve growth factor signaling pathway	GO	3 out of 7	3.60633	upregulated	1	1.28865	0.2756					downregulated	1	1.00685	0.3654	downregulated	1	1.95216	0.142	downregulated	2	4.43174	0.0119	downregulated	1	0.844956	0.4296
hindbrain morphogenesis	GO	2 out of 7	3.60047					upregulated	1	0.64862	0.5228	downregulated	4	2.34636	0.0957	downregulated	1	0.62516	0.5352	downregulated	9	2.97061	0.0513	downregulated	7	5.92337	0.0027
co-receptor binding	GO	2 out of 7	3.5508									downregulated	1	1.08404	0.3382	upregulated	1	3.25039	0.0388	downregulated	2	0.300413	0.7405
nuclear envelope organization	GO	2 out of 7	3.54883					upregulated	3	1.62095	0.1977	downregulated	5	1.34418	0.2608	downregulated	1	0.222038	0.8009	downregulated	8	1.60421	0.201	downregulated	2	3.4941	0.0304
positive regulation of ERAD pathway	GO	3 out of 7	3.53765	upregulated	2	2.95991	0.0518	upregulated	2	3.37498	0.0342	downregulated	1	0.403955	0.6677	downregulated	1	1.07434	0.3415	downregulated	3	2.17697	0.1134	upregulated	1	3.49592	0.0303
transcription corepressor binding	GO	3 out of 7	3.53325	upregulated	1	0.967542	0.38	upregulated	3	3.19309	0.041	downregulated	1	0.276478	0.7585	downregulated	1	0.757831	0.4687	upregulated	2	1.5241	0.2178	downregulated	2	1.93103	0.145
inclusion body	GO	2 out of 7	3.52871	downregulated	3	1.73334	0.1767	downregulated	2	0.679186	0.507	downregulated	6	1.87617	0.1532	downregulated	2	0.280273	0.7556	downregulated	17	4.8982	0.0075	downregulated	7	3.19948	0.0408
vasodilation	GO	3 out of 7	3.52463	upregulated	3	4.08024	0.0169	upregulated	2	3.21391	0.0402	upregulated	2	2.07139	0.126					upregulated	5	2.8507	0.0578	upregulated	3	2.99021	0.0503
regulation of urine volume	GO	3 out of 7	3.50222					upregulated	1	3.69611	0.0248	upregulated	1	1.06783	0.3438	upregulated	1	2.60627	0.0738	upregulated	1	0.854157	0.4256	upregulated	2	3.01384	0.0491
cyclosporin A binding	GO	1 out of 7	3.48655									upregulated	1	1.19155	0.3037					downregulated	7	6.42288	0.0016	upregulated	3	2.93632	0.0531
negative regulation of adherens junction organization	GO	3 out of 7	3.47545	upregulated	1	2.42741	0.0883					downregulated	2	1.65596	0.1909	upregulated	1	3.02745	0.0484	upregulated	3	1.8785	0.1528	downregulated	2	1.55505	0.2112
regulation of organelle assembly	GO	3 out of 7	3.4692	upregulated	17	6.22672	0.002	upregulated	10	2.36056	0.0944	downregulated	18	1.59013	0.2039	downregulated	11	2.20881	0.1098	upregulated	26	3.54337	0.0289	downregulated	15	2.22423	0.1082
endothelial cell proliferation	GO	1 out of 7	3.46287	upregulated	1	0.539557	0.583	upregulated	1	1.11652	0.3274	downregulated	2	1.31179	0.2693					upregulated	2	2.6891	0.0679	downregulated	4	3.46287	0.0313
ubiquitin-like protein conjugating enzyme binding	GO	4 out of 7	3.46269	upregulated	3	0.78939	0.4541	upregulated	2	0.665964	0.5138	upregulated	2	1.41322	0.2434	downregulated	1	0.750273	0.4722	downregulated	8	2.99672	0.05	upregulated	1	1.65233	0.1916
mRNA binding	GO	1 out of 7	3.4262	upregulated	14	2.17261	0.1139	upregulated	13	3.95975	0.0191	downregulated	26	4.98619	0.0068	downregulated	11	1.848	0.1576	downregulated	36	3.00355	0.0496	downregulated	18	3.4262	0.0325	upregulated	1	1.54005	0.2144
translation initiation factor binding	GO	3 out of 7	3.42161					upregulated	2	1.00863	0.3647	downregulated	1	0.0953986	0.909					downregulated	6	1.29248	0.2746	downregulated	2	1.2159	0.2964
cellular response to epinephrine stimulus	GO	3 out of 7	3.39706	upregulated	1	1.25093	0.2862	downregulated	1	4.91757	0.0073	downregulated	1	1.19067	0.304					downregulated	6	7.38901	0.0006	downregulated	1	0.865349	0.4209
positive regulation of amyloid-beta formation	GO	1 out of 7	3.39508													downregulated	1	1.43853	0.2373	downregulated	3	3.17131	0.0419	downregulated	3	4.83361	0.008
histone demethylase activity	GO	3 out of 7	3.38538	downregulated	1	1.50377	0.2223	downregulated	1	1.33892	0.2621	upregulated	1	1.39201	0.2486	upregulated	2	4.69138	0.0092	upregulated	2	0.108683	0.897	downregulated	1	0.253357	0.7762
regulation of phospholipid metabolic process	GO	3 out of 7	3.38403	upregulated	2	2.20582	0.1102	upregulated	5	5.22628	0.0054	downregulated	9	4.78515	0.0084	downregulated	5	4.7487	0.0087	downregulated	14	6.10669	0.0022	downregulated	10	5.48577	0.0041
positive regulation of flagellated sperm motility	GO	2 out of 7	3.34151									upregulated	1	2.22567	0.108									downregulated	1	1.11584	0.3276
CoA-ligase activity	GO	3 out of 7	3.33644	downregulated	3	4.92449	0.0073	upregulated	1	0.698759	0.4972	upregulated	4	6.49082	0.0015	downregulated	1	1.14797	0.3173	downregulated	5	4.4373	0.0118	upregulated	1	2.21798	0.1088
extracellular negative regulation of signal transduction	GO	3 out of 7	3.32476	downregulated	2	2.64439	0.071					upregulated	1	1.65899	0.1903					downregulated	2	1.96979	0.1395	downregulated	2	2.34037	0.0963
apicolateral plasma membrane	GO	3 out of 7	3.32398					upregulated	1	1.61407	0.1991	upregulated	1	1.12946	0.3232					downregulated	2	1.33817	0.2623	upregulated	1	0.757726	0.4687
vitamin biosynthetic process	GO	4 out of 7	3.323	upregulated	1	0.909965	0.4025	upregulated	1	0.984474	0.3736	upregulated	1	1.60011	0.2019					upregulated	2	1.9335	0.1446	downregulated	2	1.76195	0.1717
regulation of oogenesis	GO	3 out of 7	3.29847									downregulated	3	3.4773	0.0309	upregulated	1	2.40584	0.0902	downregulated	3	2.85165	0.0577	downregulated	1	1.51828	0.2191
cytoplasmic region	GO	2 out of 7	3.29257	upregulated	32	4.51318	0.011	downregulated	9	2.8379	0.0585	downregulated	41	8.44985	0.0002	downregulated	26	7.46123	0.0006	upregulated	75	25.4992	8.4e-12	downregulated	59	21.2056	6.2e-10	upregulated	3	3.6772	0.0253
transaminase activity	GO	2 out of 7	3.2893									upregulated	1	2.92732	0.0535					downregulated	6	5.39757	0.0045	upregulated	4	5.03559	0.0065
kinase activator activity	GO	3 out of 7	3.28833	upregulated	4	0.562308	0.5699	downregulated	1	1.12997	0.323	downregulated	6	5.11219	0.006	downregulated	6	3.05291	0.0472	downregulated	17	4.37711	0.0126	downregulated	13	7.644	0.0005
regulation of fertilization	GO	3 out of 7	3.28647									downregulated	2	2.27079	0.1032	upregulated	1	2.03509	0.1307	downregulated	3	1.16496	0.3119	downregulated	1	2.3572	0.0947
regulation of hydrogen peroxide-induced cell death	GO	2 out of 7	3.2716	downregulated	2	2.05066	0.1287	upregulated	2	4.6313	0.0097	downregulated	4	4.23203	0.0145	downregulated	1	2.15803	0.1156	upregulated	5	4.02429	0.0179	downregulated	3	7.08102	0.0008
regulation of mitochondrial depolarization	GO	3 out of 7	3.26127	downregulated	2	2.60906	0.0736	upregulated	1	1.90524	0.1488	downregulated	4	6.2831	0.0019	downregulated	1	2.12549	0.1194	downregulated	3	6.93127	0.001	downregulated	4	5.4424	0.0043
demethylase activity	GO	3 out of 7	3.25546	downregulated	1	1.24092	0.2891	downregulated	1	1.2007	0.301	upregulated	1	1.25235	0.2858	upregulated	2	4.37885	0.0125	upregulated	2	0.0711974	0.9313	downregulated	1	0.13709	0.8719
vitamin transport	GO	4 out of 7	3.25014	upregulated	1	1.41913	0.2419	downregulated	1	0.764691	0.4655	downregulated	2	4.14588	0.0158	upregulated	1	1.73433	0.1765	downregulated	6	3.26379	0.0382	downregulated	2	1.74346	0.1749
MCM complex	GO	2 out of 7	3.22472					upregulated	5	13.1559	1.9e-06	downregulated	2	3.36622	0.0345	downregulated	3	5.77336	0.0031	downregulated	1	0.183454	0.8324	upregulated	1	0.975059	0.3772
regulation of response to reactive oxygen species	GO	2 out of 7	3.22233	downregulated	3	2.44068	0.0871	upregulated	3	6.56697	0.0014	downregulated	4	3.49212	0.0304	downregulated	1	1.80789	0.164	upregulated	5	2.21051	0.1096	downregulated	3	6.60656	0.0014
transferase activity, transferring glycosyl groups	GO	4 out of 7	3.22053	upregulated	9	3.63038	0.0265	upregulated	12	3.47763	0.0309	upregulated	9	4.42915	0.0119	downregulated	10	2.18566	0.1124	downregulated	35	2.71853	0.066	upregulated	9	6.21531	0.002	upregulated	1	2.63418	0.0718
homologous chromosome segregation	GO	3 out of 7	3.19974	upregulated	2	0.906329	0.404	upregulated	5	3.75629	0.0234	upregulated	1	1.29484	0.2739	downregulated	1	0.236587	0.7893	upregulated	2	0.206005	0.8138	upregulated	1	2.31513	0.0988
positive regulation of autophagosome assembly	GO	4 out of 7	3.18512	upregulated	1	0.769049	0.4635	upregulated	1	1.62709	0.1965	downregulated	1	3.55814	0.0285	downregulated	3	6.30589	0.0018	downregulated	2	1.90686	0.1485	downregulated	5	8.74615	0.0002
transferase activity, transferring acyl groups	GO	4 out of 7	3.17926	upregulated	11	0.750617	0.4721	upregulated	13	3.21039	0.0403	downregulated	15	3.19771	0.0409	downregulated	9	1.47915	0.2278	downregulated	42	1.60411	0.2011	downregulated	19	2.291	0.1012
nuclear receptor activity	GO	1 out of 7	3.1779	downregulated	3	1.73583	0.1763	downregulated	2	2.14088	0.1176	downregulated	2	0.0724494	0.9301	upregulated	2	3.68353	0.0251	upregulated	8	3.2038	0.0406	downregulated	4	3.1779	0.0417
fatty acid metabolic process	GO	3 out of 7	3.1723	downregulated	11	4.5038	0.0111	upregulated	15	3.58242	0.0278	upregulated	15	7.43596	0.0006	downregulated	14	6.36581	0.0017	upregulated	33	8.58426	0.0002	downregulated	18	3.02353	0.0486
regulation of lymphocyte chemotaxis	GO	3 out of 7	3.17205									upregulated	1	2.43634	0.0875	upregulated	1	2.04309	0.1296	downregulated	3	3.69356	0.0249	upregulated	3	5.00094	0.0067
regulation of response to endoplasmic reticulum stress	GO	3 out of 7	3.17045	upregulated	6	1.97655	0.1385	upregulated	4	1.80422	0.1646	downregulated	5	1.76847	0.1706	downregulated	3	0.640742	0.5269	downregulated	14	3.70002	0.0247	upregulated	1	1.90113	0.1494
positive regulation of organelle assembly	GO	3 out of 7	3.1529	upregulated	3	2.39988	0.0907	upregulated	5	1.78004	0.1686	downregulated	6	1.81416	0.163	downregulated	6	3.47972	0.0308	upregulated	9	1.23016	0.2922	downregulated	10	5.49702	0.0041
acylglycerol metabolic process	GO	3 out of 7	3.15098	downregulated	2	5.00162	0.0067	upregulated	4	2.68322	0.0683	upregulated	7	6.85427	0.0011	downregulated	4	3.2913	0.0372	downregulated	15	2.6405	0.0713	downregulated	5	1.90641	0.1486
oxidoreductase activity, acting on CH-OH group of donors	GO	3 out of 7	3.13717	downregulated	3	2.10254	0.1221	upregulated	6	2.35215	0.0952	upregulated	3	2.10079	0.1224	downregulated	10	6.63515	0.0013	downregulated	23	4.72395	0.0089	downregulated	12	4.79877	0.0082
oxygen carrier activity	GO	1 out of 7	3.10788	downregulated	1	1.98133	0.1379					downregulated	1	5.66955	0.0034					downregulated	2	1.03113	0.3566	downregulated	1	3.10788	0.0447
positive regulation of autophagy of mitochondrion	GO	2 out of 7	3.10761	downregulated	1	1.42045	0.2416					downregulated	3	3.30806	0.0366	downregulated	1	0.91968	0.3986	downregulated	4	2.3327	0.097	downregulated	5	6.4231	0.0016
profilin binding	GO	1 out of 7	3.09574									downregulated	1	0.752277	0.4713					upregulated	2	3.1165	0.0443	downregulated	2	3.09574	0.0452
neutral lipid metabolic process	GO	3 out of 7	3.09063	downregulated	2	4.97486	0.0069	upregulated	4	2.64967	0.0707	upregulated	7	6.78609	0.0011	downregulated	4	3.25537	0.0386	downregulated	16	4.77604	0.0084	downregulated	5	1.88509	0.1518
double-stranded RNA binding	GO	1 out of 7	3.08575	upregulated	5	1.16891	0.3107	upregulated	4	3.20404	0.0406	downregulated	6	3.65484	0.0259	downregulated	6	2.37814	0.0927	upregulated	13	1.97254	0.1391	downregulated	7	3.08575	0.0457
iron ion import	GO	3 out of 7	3.06634	upregulated	1	0.880479	0.4146					upregulated	2	1.73742	0.176	upregulated	1	2.96918	0.0513	upregulated	1	0.759881	0.4677	upregulated	1	1.76086	0.1719
negative regulation of chromosome organization	GO	3 out of 7	3.02098	upregulated	11	5.07564	0.0062	upregulated	6	2.63209	0.0719	downregulated	8	1.15026	0.3166	downregulated	7	2.52493	0.0801	downregulated	15	0.333684	0.7163	upregulated	4	1.34524	0.2605
transferase activity, transferring acyl groups other than amino-acyl groups	GO	4 out of 7	3.01292	upregulated	10	0.801356	0.4487	upregulated	12	3.3302	0.0358	downregulated	13	3.16242	0.0423	downregulated	9	2.00156	0.1351	downregulated	36	1.20043	0.3011	downregulated	18	2.84491	0.0581
endoplasmic reticulum-Golgi intermediate compartment	GO	1 out of 7	3.01168	upregulated	5	1.17879	0.3077	upregulated	7	2.58585	0.0753	downregulated	8	0.669245	0.5121	downregulated	5	0.652804	0.5206	downregulated	23	1.15437	0.3153	downregulated	11	3.01168	0.0492
negative regulation of ERBB signaling pathway	GO	3 out of 7	3.00866	upregulated	1	0.896464	0.408	downregulated	2	3.5672	0.0282	downregulated	3	1.60449	0.201	downregulated	4	2.1209	0.1199	downregulated	9	5.47227	0.0042	downregulated	6	3.93251	0.0196
muscle filament sliding	GO	4 out of 7	2.99424	upregulated	2	1.47092	0.2297	downregulated	1	1.35795	0.2572	upregulated	1	0.896398	0.408	upregulated	2	4.87696	0.0076	upregulated	4	3.07695	0.0461	downregulated	1	0.184865	0.8312
drug transmembrane transporter activity	GO	4 out of 7	2.98331	upregulated	4	1.82439	0.1613	upregulated	2	2.89922	0.0551	upregulated	3	5.72758	0.0033	downregulated	2	1.57574	0.2069	upregulated	12	9.56463	7e-05	downregulated	10	3.67249	0.0254
negative regulation of gene expression, epigenetic	GO	2 out of 7	2.95086	upregulated	3	1.17787	0.3079	upregulated	7	6.44539	0.0016	downregulated	7	2.23502	0.107	downregulated	4	1.79198	0.1666	upregulated	3	0.0631666	0.9388	upregulated	3	0.582231	0.5587
transcription factor TFIID complex	GO	1 out of 7	2.95042	upregulated	3	2.24306	0.1061	upregulated	2	3.26491	0.0382	upregulated	1	0.778685	0.459	upregulated	1	4.52408	0.0108	downregulated	5	0.378829	0.6847	downregulated	4	2.95042	0.0523
Derlin-1 retrotranslocation complex	GO	3 out of 7	2.92866	upregulated	1	1.76853	0.1706	upregulated	1	1.04588	0.3514					downregulated	1	1.43609	0.2379	downregulated	2	1.55033	0.2122
G-protein coupled purinergic nucleotide receptor signaling pathway	GO	2 out of 7	2.91671	downregulated	1	5.37285	0.0046	upregulated	2	10.5124	2.7e-05	upregulated	1	3.37195	0.0343	downregulated	2	5.59477	0.0037
tissue homeostasis	GO	1 out of 7	2.90599	downregulated	6	2.28557	0.1017	upregulated	6	4.17397	0.0154	downregulated	11	6.58247	0.0014	downregulated	12	8.85721	0.0001	upregulated	21	9.13396	0.0001	downregulated	13	2.90599	0.0547	upregulated	1	1.12366	0.3251
heart morphogenesis	GO	1 out of 7	2.90052	upregulated	17	6.25981	0.0019	downregulated	5	2.37804	0.0927	downregulated	15	2.82904	0.0591	downregulated	12	1.77213	0.17	upregulated	38	14.16	7.1e-07	downregulated	17	2.90052	0.055	upregulated	2	2.03491	0.1307
regulation of cell cycle G2/M phase transition	GO	4 out of 7	2.88024	upregulated	14	3.57505	0.028	upregulated	14	8.38774	0.0002	downregulated	21	10.3029	3.4e-05	downregulated	10	3.57126	0.0281	downregulated	34	2.01883	0.1328	downregulated	15	2.77283	0.0625
odorant binding	GO	1 out of 7	2.8698																					downregulated	1	2.8698	0.0567
positive regulation of cyclin-dependent protein kinase activity	GO	2 out of 7	2.83012					downregulated	1	1.28394	0.2769	upregulated	2	2.71006	0.0665	downregulated	2	1.21247	0.2975	downregulated	9	1.93197	0.1449	downregulated	4	2.61647	0.0731
nuclear transcriptional repressor complex	GO	4 out of 7	2.80912	upregulated	1	0.236641	0.7893	upregulated	2	1.36149	0.2563	downregulated	1	0.644998	0.5247					downregulated	4	0.458949	0.6319	downregulated	3	1.39703	0.2473
post-anal tail morphogenesis	GO	2 out of 7	2.79313	upregulated	3	4.88414	0.0076					downregulated	1	0.396243	0.6728					upregulated	2	2.39668	0.091	downregulated	1	0.701915	0.4956
bone remodeling	GO	3 out of 7	2.76192	downregulated	1	0.558759	0.5719	upregulated	1	0.729259	0.4823	upregulated	1	1.26297	0.2828	downregulated	1	0.791785	0.453	upregulated	6	2.76474	0.063	downregulated	3	2.12023	0.12
negative regulation of cold-induced thermogenesis	GO	2 out of 7	2.75361	downregulated	1	0.38156	0.6828	upregulated	4	6.27577	0.0019	upregulated	2	3.50401	0.0301	downregulated	3	2.60844	0.0736	upregulated	5	2.40122	0.0906	upregulated	3	1.63496	0.195
Seh1-associated complex	GO	3 out of 7	2.74609	upregulated	1	2.05909	0.1276									downregulated	1	0.842295	0.4307	downregulated	1	0.790658	0.4535	downregulated	1	0.738632	0.4778
spindle elongation	GO	3 out of 7	2.7418	upregulated	1	0.875201	0.4168	upregulated	1	4.47555	0.0114	downregulated	1	0.717273	0.4881	downregulated	1	1.18101	0.307	upregulated	2	2.05447	0.1282	downregulated	1	1.3438	0.2609
ovulation cycle process	GO	3 out of 7	2.73103	upregulated	2	1.99747	0.1357					upregulated	1	1.75153	0.1735	downregulated	1	0.663934	0.5148	upregulated	6	3.50308	0.0301	downregulated	4	3.14905	0.0429
interstrand cross-link repair	GO	4 out of 7	2.72711	upregulated	4	1.59797	0.2023	upregulated	4	2.81735	0.0598	downregulated	4	1.45838	0.2326	downregulated	3	1.44727	0.2352	downregulated	5	0.410504	0.6633	downregulated	2	0.806933	0.4462
structural constituent of epidermis	GO	1 out of 7	2.71447													upregulated	1	2.71447	0.0662
mitochondrial inner membrane presequence translocase complex	GO	1 out of 7	2.70571																	downregulated	8	10.7605	2.1e-05	downregulated	3	2.70571	0.0668
hydro-lyase activity	GO	2 out of 7	2.70243	downregulated	2	3.51702	0.0297					upregulated	1	0.742565	0.4759	downregulated	2	0.788117	0.4547	downregulated	15	7.53269	0.0005	upregulated	1	1.26769	0.2815
cerebellar Purkinje cell layer morphogenesis	GO	2 out of 7	2.69326									downregulated	3	4.23495	0.0145					downregulated	5	4.43516	0.0119	downregulated	2	2.49305	0.0827
cerebellar Purkinje cell layer formation	GO	2 out of 7	2.6929									downregulated	2	2.80367	0.0606					downregulated	4	4.25822	0.0141	downregulated	1	1.23836	0.2899
endocrine process	GO	3 out of 7	2.67336	downregulated	3	2.37644	0.0929	upregulated	2	1.07841	0.3401	upregulated	3	2.19456	0.1114	upregulated	3	4.98277	0.0069	upregulated	5	0.968203	0.3798	upregulated	1	2.23773	0.1067
amine biosynthetic process	GO	3 out of 7	2.6553					upregulated	1	0.730734	0.4816	upregulated	2	3.21722	0.0401	downregulated	1	0.899554	0.4068	upregulated	2	1.31315	0.269	downregulated	1	0.920047	0.3985
hydrolase activity, hydrolyzing O-glycosyl compounds	GO	1 out of 7	2.65471	downregulated	3	2.07712	0.1253	upregulated	2	0.342424	0.71	downregulated	11	6.54647	0.0014	downregulated	7	6.72337	0.0012	upregulated	4	1.57935	0.2061	downregulated	6	2.65471	0.0703
post-Golgi vesicle-mediated transport	GO	3 out of 7	2.64647	upregulated	7	2.84267	0.0583	downregulated	2	0.958751	0.3834	upregulated	3	1.22936	0.2925	downregulated	8	4.83974	0.0079	downregulated	28	12.3179	4.5e-06	downregulated	11	4.37293	0.0126
aging	GO	2 out of 7	2.6453	downregulated	5	3.74693	0.0236	upregulated	15	7.26999	0.0007	downregulated	22	6.65235	0.0013	downregulated	14	5.73301	0.0032	downregulated	36	4.32597	0.0132	downregulated	19	4.85525	0.0078
diencephalon development	GO	4 out of 7	2.64298	downregulated	1	1.21905	0.2955	upregulated	1	0.687228	0.503	downregulated	4	3.6127	0.027	upregulated	1	0.785661	0.4558	downregulated	11	4.8063	0.0082	downregulated	2	1.19554	0.3025
vacuolar transport	GO	3 out of 7	2.62246	upregulated	8	3.2461	0.0389	upregulated	7	1.75907	0.1722	upregulated	8	4.96023	0.007	downregulated	13	8.9963	0.0001	downregulated	26	5.00754	0.0067	downregulated	14	4.89945	0.0075
cellular senescence	GO	3 out of 7	2.62163	downregulated	1	0.771086	0.4625	upregulated	1	0.267995	0.7649	downregulated	1	0.137417	0.8716					downregulated	5	1.5421	0.2139	downregulated	2	1.72004	0.1791
lamin binding	GO	1 out of 7	2.61147					upregulated	2	3.58992	0.0276	downregulated	1	1.33102	0.2642	upregulated	2	4.45343	0.0116	downregulated	1	0.622776	0.5365	downregulated	1	2.61147	0.0734
protein localization to lysosome	GO	3 out of 7	2.60721	upregulated	3	3.7252	0.0241	upregulated	2	2.96117	0.0518	downregulated	4	2.90865	0.0545	downregulated	3	3.11913	0.0442	upregulated	4	2.07587	0.1254	downregulated	4	4.02449	0.0179
sodium:potassium-exchanging ATPase complex	GO	1 out of 7	2.60352																	downregulated	3	4.94254	0.0071	downregulated	2	2.60352	0.074
endosome to melanosome transport	GO	2 out of 7	2.59962																	downregulated	2	1.36127	0.2563	downregulated	1	1.23836	0.2899
leukotriene D4 biosynthetic process	GO	2 out of 7	2.58399					upregulated	1	2.85468	0.0576	downregulated	1	1.1116	0.329					downregulated	1	0.840903	0.4313
chaperonin-containing T-complex	GO	1 out of 7	2.56399					upregulated	1	3.01678	0.049									downregulated	4	5.17862	0.0056	downregulated	2	2.56399	0.077
RNA polymerase III regulatory region DNA binding	GO	2 out of 7	2.55815																	downregulated	2	1.40729	0.2448	downregulated	1	1.15086	0.3164
Flemming body	GO	2 out of 7	2.55462	upregulated	3	2.72405	0.0656	upregulated	3	3.1425	0.0432	downregulated	2	1.41725	0.2424	downregulated	2	1.89468	0.1504	upregulated	2	0.899678	0.4067
walking behavior	GO	2 out of 7	2.54638	downregulated	2	4.67176	0.0094					downregulated	4	4.97296	0.0069	downregulated	4	6.18006	0.0021	downregulated	8	9.75646	5.8e-05	downregulated	6	8.6147	0.0002
endopeptidase inhibitor activity	GO	1 out of 7	2.52728	downregulated	5	2.58538	0.0754	upregulated	4	2.42099	0.0888	upregulated	3	1.21764	0.2959	upregulated	2	2.30024	0.1002	upregulated	21	11.7962	7.5e-06	downregulated	3	2.52728	0.0799
isoprenoid binding	GO	4 out of 7	2.50909	upregulated	1	1.45285	0.2339	upregulated	1	0.730283	0.4818	upregulated	3	4.39756	0.0123	downregulated	2	1.73812	0.1759	downregulated	5	2.23289	0.1072	upregulated	3	4.56637	0.0104
negative regulation of cellular response to transforming growth factor beta stimulus	GO	4 out of 7	2.50649	upregulated	1	2.56128	0.0772	upregulated	4	4.2282	0.0146	upregulated	6	5.93143	0.0027	downregulated	3	1.1373	0.3207	upregulated	13	9.58814	6.9e-05	downregulated	7	2.55494	0.0777	upregulated	1	2.04393	0.1295
regulation of rRNA processing	GO	2 out of 7	2.47096					upregulated	1	2.05843	0.1277									downregulated	2	0.412528	0.662
cellular response to hepatocyte growth factor stimulus	GO	3 out of 7	2.43483	downregulated	1	2.47996	0.0837	upregulated	1	2.28457	0.1018	upregulated	1	2.40205	0.0905					upregulated	2	0.748121	0.4733	downregulated	1	0.976295	0.3767
folic acid-containing compound metabolic process	GO	2 out of 7	2.4308	downregulated	1	0.529861	0.5887	upregulated	3	5.3727	0.0046	downregulated	5	2.83736	0.0586	downregulated	1	0.497778	0.6079	downregulated	3	0.201149	0.8178	downregulated	1	0.923096	0.3973
lymphocyte proliferation	GO	4 out of 7	2.40222	upregulated	2	2.61449	0.0732	upregulated	2	0.309906	0.7335	downregulated	4	3.94184	0.0194	downregulated	4	4.44159	0.0118	downregulated	10	4.59509	0.0101	downregulated	5	3.26617	0.0382
negative regulation of cytokine production involved in inflammatory response	GO	1 out of 7	2.36519	upregulated	1	4.12137	0.0162																	upregulated	1	1.75618	0.1727
peptide-lysine-N-acetyltransferase activity	GO	3 out of 7	2.36158	upregulated	3	0.385946	0.6798	upregulated	5	3.25796	0.0385	downregulated	4	0.465889	0.6276	downregulated	2	0.298354	0.742	upregulated	8	1.33461	0.2633	downregulated	4	0.81653	0.442
negative regulation of cilium assembly	GO	3 out of 7	2.35851	upregulated	2	3.31674	0.0363	downregulated	1	3.26862	0.0381	downregulated	4	4.56488	0.0104	downregulated	2	2.2349	0.107	downregulated	4	6.88523	0.001	downregulated	1	2.22495	0.1081
pre-mRNA cleavage required for polyadenylation	GO	4 out of 7	2.34408					upregulated	1	1.36341	0.2558	upregulated	1	1.75397	0.1731	downregulated	1	1.89085	0.1509	downregulated	1	0.31164	0.7322	downregulated	1	0.805909	0.4467
positive regulation of protein targeting to mitochondrion	GO	4 out of 7	2.34357	upregulated	2	0.842821	0.4305					upregulated	1	0.897687	0.4075	downregulated	2	1.04016	0.3534	downregulated	5	0.803791	0.4476	downregulated	2	0.839433	0.432
SH3/SH2 adaptor activity	GO	1 out of 7	2.33208	upregulated	2	1.65175	0.1917	upregulated	2	0.61461	0.5409	downregulated	5	2.43872	0.0873	downregulated	2	0.72655	0.4836	upregulated	5	2.06345	0.127	downregulated	5	2.33208	0.0971
cytokine production	GO	1 out of 7	2.33204	downregulated	2	0.179658	0.8356	upregulated	6	2.12885	0.119	downregulated	15	9.3204	9e-05	downregulated	9	5.20719	0.0055	upregulated	27	15.9899	1.1e-07	downregulated	6	2.33204	0.0971	upregulated	1	1.65893	0.1903
positive regulation of glycoprotein metabolic process	GO	4 out of 7	2.32286	upregulated	1	0.743321	0.4755	upregulated	1	0.67255	0.5104					upregulated	1	1.57847	0.2063	upregulated	4	3.62759	0.0266	downregulated	2	2.95612	0.052
regulation of bile acid metabolic process	GO	2 out of 7	2.30922									upregulated	1	4.19681	0.015	downregulated	1	1.99136	0.1365	downregulated	1	0.103776	0.9014
photoreceptor cell maintenance	GO	4 out of 7	2.29875	upregulated	1	1.17608	0.3085	upregulated	2	2.51812	0.0806	downregulated	1	0.801393	0.4487	downregulated	1	2.09303	0.1233	downregulated	5	0.736702	0.4787	downregulated	1	0.762284	0.4666
positive regulation of protein localization to cell surface	GO	2 out of 7	2.22931	downregulated	1	1.84209	0.1585													downregulated	3	2.13765	0.1179	downregulated	2	1.93375	0.1446
myoblast fusion	GO	2 out of 7	2.22324	upregulated	1	1.3355	0.263					downregulated	1	0.584412	0.5574	downregulated	1	1.09641	0.3341	upregulated	2	2.60096	0.0742	downregulated	2	2.56856	0.0766
acid-amino acid ligase activity	GO	3 out of 7	2.20195	downregulated	1	1.02771	0.3578	upregulated	1	1.95031	0.1422	upregulated	2	2.43532	0.0876					downregulated	4	1.00464	0.3662	upregulated	2	2.16062	0.1153
proteasome regulatory particle	GO	1 out of 7	2.19502	upregulated	1	0.930435	0.3944	upregulated	1	1.37682	0.2524	upregulated	1	1.2396	0.2895					downregulated	7	5.16293	0.0057	downregulated	3	2.19502	0.1114
fatty acid binding	GO	1 out of 7	2.18801	upregulated	1	0.660789	0.5164	upregulated	3	2.90716	0.0546	downregulated	3	9.46492	7.8e-05	downregulated	2	4.48198	0.0113	upregulated	4	4.55971	0.0105	downregulated	2	2.18801	0.1121
regulation of hepatocyte proliferation	GO	2 out of 7	2.17006					upregulated	2	3.98015	0.0187	downregulated	1	1.25105	0.2862					downregulated	2	1.34802	0.2598	upregulated	1	1.90705	0.1485
adenosine deaminase activity	GO	1 out of 7	2.15679					upregulated	1	1.51876	0.219	downregulated	2	6.02619	0.0024	downregulated	1	1.8412	0.1586	downregulated	1	1.35318	0.2584	downregulated	2	2.15679	0.1157
aromatic amino acid family metabolic process	GO	3 out of 7	2.14755	downregulated	2	1.99074	0.1366	downregulated	1	0.882816	0.4136	upregulated	2	2.4522	0.0861	upregulated	1	1.63705	0.1946	upregulated	1	0.199561	0.8191	downregulated	2	1.13141	0.3226
positive regulation of plasma membrane bounded cell projection assembly	GO	4 out of 7	2.13193	upregulated	4	2.76893	0.0627	upregulated	3	5.06708	0.0063	downregulated	13	5.62531	0.0036	downregulated	9	7.55119	0.0005	downregulated	19	4.93822	0.0072	downregulated	9	2.5342	0.0793
microtubule motor activity	GO	1 out of 7	2.12691	downregulated	2	3.21332	0.0402	upregulated	3	0.974449	0.3774	downregulated	10	2.37908	0.0926	downregulated	5	1.56961	0.2081	upregulated	11	1.92398	0.146	downregulated	9	2.12691	0.1192	upregulated	1	1.71578	0.1798
protein targeting to ER	GO	6 out of 7	2.12597	upregulated	2	0.0264677	0.9739	upregulated	2	0.152463	0.8586	upregulated	2	0.229742	0.7947	upregulated	1	1.20243	0.3005	downregulated	10	0.0395228	0.9612	downregulated	2	0.47534	0.6217
positive regulation of supramolecular fiber organization	GO	3 out of 7	2.12532	upregulated	6	1.69848	0.183	upregulated	6	2.40238	0.0905	downregulated	20	7.45792	0.0006	downregulated	9	5.21244	0.0054	downregulated	39	11.7994	7.5e-06	downregulated	26	10.6948	2.3e-05
regulation of telomere capping	GO	4 out of 7	2.12171	upregulated	2	2.48933	0.083	upregulated	1	1.19592	0.3024	downregulated	2	2.38334	0.0922	downregulated	1	2.02163	0.1324	downregulated	6	2.38662	0.0919	downregulated	1	0.454806	0.6346
cell aging	GO	3 out of 7	2.10698	upregulated	3	1.96948	0.1395	upregulated	3	1.65623	0.1909	downregulated	4	1.04978	0.35	downregulated	2	1.21989	0.2953	upregulated	6	1.19157	0.3037	downregulated	3	0.750926	0.4719
insulin receptor substrate binding	GO	3 out of 7	2.10432	upregulated	2	2.38991	0.0916	upregulated	1	0.88142	0.4142	downregulated	1	2.11974	0.1201	downregulated	1	1.66697	0.1888	upregulated	4	3.27391	0.0379	downregulated	4	5.8936	0.0028
intra-Golgi vesicle-mediated transport	GO	3 out of 7	2.08184	upregulated	2	1.68332	0.1858	upregulated	1	0.304474	0.7375	downregulated	3	2.36182	0.0942	downregulated	1	1.153	0.3157	downregulated	11	6.84848	0.0011	downregulated	5	3.60886	0.0271
muscle organ development	GO	2 out of 7	2.02641	upregulated	14	4.91526	0.0073	upregulated	8	1.74608	0.1745	downregulated	24	4.7271	0.0089	downregulated	11	1.94029	0.1437	upregulated	38	7.42924	0.0006	downregulated	19	4.66627	0.0094	upregulated	1	0.88773	0.4116
natural killer cell mediated cytotoxicity	GO	4 out of 7	2.02489	downregulated	1	1.52317	0.218	upregulated	1	0.748639	0.473	upregulated	1	0.727874	0.4829	upregulated	1	2.61757	0.073	downregulated	5	3.49048	0.0305	upregulated	3	4.0365	0.0177
autophagy	GO	3 out of 7	2.02315	upregulated	9	1.0757	0.3411	upregulated	13	1.93737	0.1441	downregulated	22	6.56776	0.0014	downregulated	10	2.49392	0.0826	downregulated	46	7.74297	0.0004	downregulated	28	8.93352	0.0001	upregulated	1	0.861761	0.4224
retromer complex	GO	3 out of 7	2.01794									upregulated	1	2.16252	0.115	downregulated	3	2.79091	0.0614	downregulated	4	0.724987	0.4843	downregulated	3	1.92133	0.1464
proteasome core complex	GO	1 out of 7	2.0073					upregulated	1	1.72729	0.1778	downregulated	3	2.10368	0.122	downregulated	2	2.16569	0.1147	downregulated	9	6.53131	0.0015	downregulated	3	2.0073	0.1344
liver regeneration	GO	3 out of 7	1.9916	downregulated	1	0.496382	0.6087	upregulated	2	5.15002	0.0058	downregulated	5	2.26552	0.1038	upregulated	1	2.21698	0.1089	upregulated	7	5.74268	0.0032	downregulated	1	3.12918	0.0438
chromosome separation	GO	3 out of 7	1.96396					upregulated	1	0.989949	0.3716	downregulated	3	1.331	0.2642	upregulated	1	1.69611	0.1834	upregulated	1	0.0375818	0.9631	downregulated	1	0.646483	0.5239
blastocyst development	GO	1 out of 7	1.96359	upregulated	1	0.563198	0.5694	upregulated	3	2.67738	0.0687	downregulated	3	1.50359	0.2223	downregulated	5	3.41118	0.033	upregulated	6	1.19681	0.3022	downregulated	4	1.96359	0.1404
proteasome core complex, beta-subunit complex	GO	2 out of 7	1.92405									downregulated	2	2.31471	0.0988	downregulated	1	1.83497	0.1596	downregulated	5	4.34743	0.0129	downregulated	2	1.7263	0.1779
nuclear pore	GO	1 out of 7	1.92272	upregulated	5	1.96293	0.1404	downregulated	2	1.88247	0.1522	upregulated	2	0.386137	0.6797	downregulated	5	1.46038	0.2321	downregulated	15	1.39076	0.2489	downregulated	7	1.92272	0.1462
translation	GO	1 out of 7	1.89732	upregulated	15	0.251288	0.7778	upregulated	16	3.78873	0.0226	upregulated	13	1.37089	0.2539	upregulated	5	1.41957	0.2418	downregulated	80	8.88909	0.0001	downregulated	33	3.22114	0.0399	upregulated	1	1.32382	0.2661
regulation of postsynaptic membrane organization	GO	1 out of 7	1.87881					upregulated	2	3.98015	0.0187					upregulated	1	2.78381	0.0618	upregulated	2	0.904999	0.4045
negative regulation of protein acetylation	GO	3 out of 7	1.87794	downregulated	1	3.26551	0.0382					upregulated	1	1.91042	0.148	downregulated	1	0.507299	0.6021	downregulated	3	2.55651	0.0776	downregulated	2	1.18383	0.3061
neural tube closure	GO	1 out of 7	1.86556	upregulated	2	0.952077	0.3859	upregulated	1	3.05684	0.047	downregulated	8	4.46053	0.0116	downregulated	2	0.431452	0.6496	upregulated	11	3.59554	0.0274	downregulated	5	1.86556	0.1548
peroxidase activity	GO	1 out of 7	1.86268	downregulated	1	0.803425	0.4478	downregulated	1	1.26604	0.2819	downregulated	4	6.98698	0.0009	downregulated	3	4.10526	0.0165	upregulated	3	2.38826	0.0918	downregulated	2	1.86268	0.1553
detection of abiotic stimulus	GO	3 out of 7	1.85785	upregulated	4	3.19564	0.0409	downregulated	3	2.92027	0.0539	downregulated	8	4.75006	0.0087	downregulated	8	8.12871	0.0003	downregulated	20	6.82552	0.0011	downregulated	13	7.63572	0.0005
eosinophil migration	GO	2 out of 7	1.85736	downregulated	1	2.49718	0.0823					upregulated	1	2.69553	0.0675					downregulated	3	3.82531	0.0218	upregulated	1	2.1663	0.1146
carboxylic ester hydrolase activity	GO	2 out of 7	1.84201	downregulated	2	1.21363	0.2971	downregulated	1	0.338641	0.7127	downregulated	6	4.3275	0.0132	downregulated	6	2.79393	0.0612	downregulated	25	7.18319	0.0008	downregulated	12	3.33252	0.0357
regulation of flagellated sperm motility	GO	2 out of 7	1.84132									upregulated	1	1.7077	0.1813					upregulated	1	0.646021	0.5241	downregulated	1	0.779643	0.4586
muscle cell differentiation	GO	4 out of 7	1.82604	upregulated	13	5.45937	0.0043	upregulated	7	2.13058	0.1188	downregulated	18	3.07477	0.0462	upregulated	5	4.27192	0.014	upregulated	30	9.42113	8.1e-05	downregulated	17	2.46005	0.0854
brush border	GO	1 out of 7	1.8055	downregulated	1	0.929334	0.3948	upregulated	2	0.157627	0.8542	downregulated	11	8.58677	0.0002	downregulated	7	5.75867	0.0032	upregulated	17	8.23916	0.0003	downregulated	7	1.8055	0.1644
nitric oxide biosynthetic process	GO	1 out of 7	1.79446																	upregulated	3	4.54733	0.0106	downregulated	1	1.79446	0.1662
suckling behavior	GO	1 out of 7	1.7827	upregulated	2	2.20255	0.1105	upregulated	1	1.69083	0.1844									downregulated	5	5.76713	0.0031	downregulated	1	1.7827	0.1682
mitotic chromosome condensation	GO	2 out of 7	1.77112	upregulated	1	0.79293	0.4525	upregulated	2	3.42924	0.0324	downregulated	3	2.45105	0.0862					upregulated	2	1.97139	0.1393
peptidyl-threonine dephosphorylation	GO	3 out of 7	1.76713	upregulated	1	1.27283	0.28					downregulated	2	3.73156	0.024	downregulated	2	3.66808	0.0255	downregulated	5	5.09711	0.0061	downregulated	2	2.79683	0.061
synapsis	GO	2 out of 7	1.76391	downregulated	1	0.604394	0.5464	upregulated	4	3.76881	0.0231	upregulated	1	1.45034	0.2345	downregulated	1	0.318186	0.7275	upregulated	2	0.282094	0.7542	upregulated	1	2.53265	0.0794
transcription coactivator activity	GO	1 out of 7	1.75025	downregulated	9	1.55888	0.2104	upregulated	10	0.996342	0.3692	upregulated	9	0.665598	0.514	downregulated	15	1.39826	0.247	upregulated	40	6.08639	0.0023	downregulated	16	1.75025	0.1737	upregulated	2	1.48559	0.2264
negative regulation of TORC1 signaling	GO	3 out of 7	1.72585	upregulated	2	4.08622	0.0168	upregulated	1	1.89863	0.1498	downregulated	1	1.86731	0.1545	downregulated	2	3.17134	0.0419					downregulated	1	0.779643	0.4586
positive regulation of podosome assembly	GO	2 out of 7	1.68082					upregulated	1	2.83339	0.0588									upregulated	3	3.31549	0.0363	downregulated	2	2.16293	0.115
transferase activity, transferring pentosyl groups	GO	4 out of 7	1.68066	upregulated	3	1.05615	0.3478	upregulated	2	0.946241	0.3882	upregulated	1	2.92772	0.0535	upregulated	1	1.82344	0.1615	upregulated	6	2.03055	0.1313	upregulated	1	3.04235	0.0477
photoreceptor cell outer segment organization	GO	3 out of 7	1.67897	upregulated	1	1.64442	0.1931	downregulated	1	2.97417	0.0511	upregulated	1	1.64612	0.1928					downregulated	3	1.3626	0.256
beta-catenin-TCF complex	GO	3 out of 7	1.67893	downregulated	1	1.07196	0.3423	upregulated	1	0.906972	0.4037	upregulated	1	1.1345	0.3216					upregulated	2	1.68456	0.1855	downregulated	2	2.39398	0.0913
negative regulation of protein serine/threonine kinase activity	GO	2 out of 7	1.6783	upregulated	6	1.45633	0.2331	downregulated	3	1.50158	0.2228	downregulated	11	4.14214	0.0159	downregulated	6	6.23137	0.002	upregulated	18	4.39597	0.0123	downregulated	19	12.0971	5.6e-06
regulation of ruffle assembly	GO	2 out of 7	1.65397	downregulated	1	1.42172	0.2413	upregulated	2	7.05354	0.0009	downregulated	4	2.49868	0.0822	downregulated	3	3.8146	0.022	downregulated	9	3.50164	0.0301	upregulated	1	1.16621	0.3115
nuclease activity	GO	1 out of 7	1.65269	upregulated	13	2.70309	0.067	upregulated	15	8.92238	0.0001	downregulated	20	9.1061	0.0001	downregulated	10	5.18786	0.0056	upregulated	14	1.29473	0.274	downregulated	15	1.65269	0.1915
inflammatory response to antigenic stimulus	GO	1 out of 7	1.64167	downregulated	2	1.99304	0.1363	downregulated	1	0.995477	0.3695	downregulated	3	2.37434	0.0931	downregulated	1	1.14169	0.3193	downregulated	3	1.02908	0.3573	downregulated	2	1.64167	0.1937
activation of innate immune response	GO	1 out of 7	1.63889	downregulated	8	4.01702	0.018	upregulated	7	6.2057	0.002	downregulated	29	18.9877	5.7e-09	downregulated	23	23.3556	7.2e-11	upregulated	42	21.5192	4.5e-10	downregulated	5	1.63889	0.1942
cytoplasmic translation	GO	4 out of 7	1.63604	upregulated	2	0.442248	0.6426	upregulated	1	1.07009	0.343	downregulated	3	0.346145	0.7074	downregulated	2	1.36315	0.2559	downregulated	10	1.20832	0.2987	downregulated	4	0.624674	0.5354
monooxygenase activity	GO	1 out of 7	1.63021	downregulated	2	1.21427	0.2969	downregulated	2	4.34122	0.013	downregulated	7	2.60813	0.0737	downregulated	4	3.74043	0.0237	downregulated	9	2.18351	0.1126	downregulated	5	1.63021	0.1959
neural tube formation	GO	1 out of 7	1.62274	upregulated	3	0.989237	0.3719	upregulated	3	2.86064	0.0572	downregulated	8	3.74707	0.0236	downregulated	2	0.282705	0.7537	upregulated	11	2.71918	0.0659	downregulated	6	1.62274	0.1974
RNA polymerase II activity	GO	2 out of 7	1.61786									downregulated	1	1.78356	0.168					downregulated	3	2.58935	0.0751	downregulated	1	0.812066	0.4439
cellular component disassembly involved in execution phase of apoptosis	GO	2 out of 7	1.60388	upregulated	2	1.68712	0.1851	upregulated	2	3.65786	0.0258	downregulated	5	3.23562	0.0393	downregulated	1	0.505484	0.6032	downregulated	5	1.89586	0.1502
nuclear pore central transport channel	GO	2 out of 7	1.60291					upregulated	1	2.17145	0.114									upregulated	1	1.34357	0.2609	downregulated	1	0.775029	0.4607
cytokine production involved in immune response	GO	1 out of 7	1.57503	upregulated	1	1.23942	0.2896	upregulated	1	0.524095	0.5921	upregulated	1	2.44287	0.0869	upregulated	1	3.44634	0.0319	downregulated	3	2.55628	0.0776	downregulated	1	1.57503	0.207
regulation of RNA polymerase II regulatory region sequence-specific DNA binding	GO	1 out of 7	1.55221					upregulated	1	4.36756	0.0127					downregulated	1	1.3975	0.2472	upregulated	1	1.41786	0.2422
intraciliary retrograde transport	GO	2 out of 7	1.53405	downregulated	1	1.82736	0.1608					upregulated	1	3.0871	0.0456					downregulated	1	0.274311	0.7601
toxin transport	GO	2 out of 7	1.53073	downregulated	1	1.79923	0.1654	downregulated	1	1.61472	0.1989	upregulated	2	1.56796	0.2085	downregulated	1	0.806216	0.4465	downregulated	10	4.73744	0.0088	downregulated	6	4.18293	0.0153
multicellular organism growth	GO	3 out of 7	1.53065	downregulated	4	3.05441	0.0472	downregulated	2	3.06777	0.0465	upregulated	1	5.9431	0.0026	upregulated	1	1.41803	0.2422	upregulated	9	4.22475	0.0146	downregulated	9	4.51645	0.0109
regulation of NLRP3 inflammasome complex assembly	GO	2 out of 7	1.52934					upregulated	1	4.04199	0.0176	downregulated	1	1.50557	0.2219					upregulated	2	1.98845	0.1369	downregulated	1	0.981377	0.3748
GTPase inhibitor activity	GO	1 out of 7	1.5141									downregulated	2	2.19231	0.1117	downregulated	2	2.68101	0.0685	upregulated	2	3.0052	0.0495	downregulated	1	1.5141	0.22
heterotrimeric G-protein complex	GO	1 out of 7	1.48615	upregulated	3	5.00813	0.0067	downregulated	1	1.11978	0.3264	upregulated	2	1.238	0.29	downregulated	1	0.339369	0.7122	downregulated	6	13.3273	1.6e-06	downregulated	2	1.48615	0.2262
carbohydrate catabolic process	GO	2 out of 7	1.47009	downregulated	2	0.728861	0.4825	downregulated	1	0.932333	0.3936	downregulated	7	1.08514	0.3379	downregulated	7	4.40855	0.0122	downregulated	18	2.6705	0.0692	downregulated	14	5.95448	0.0026
cell communication by electrical coupling involved in cardiac conduction	GO	1 out of 7	1.46208					downregulated	1	4.775	0.0084					downregulated	1	2.44233	0.087	downregulated	8	12.508	3.7e-06	upregulated	1	3.82855	0.0217
midbrain dopaminergic neuron differentiation	GO	1 out of 7	1.44968																	downregulated	1	1.44968	0.2346
regulation of fibroblast apoptotic process	GO	2 out of 7	1.43504	upregulated	3	2.6379	0.0715	downregulated	1	1.32426	0.266	upregulated	1	0.808017	0.4457					upregulated	1	0.686607	0.5033
uropod	GO	1 out of 7	1.41062									downregulated	1	1.28972	0.2753	downregulated	2	2.7595	0.0633	upregulated	5	6.78475	0.0011	downregulated	1	1.41062	0.244
RNA polymerase II complex binding	GO	3 out of 7	1.4017	upregulated	2	1.23772	0.29					downregulated	4	1.25117	0.2862	downregulated	2	1.2856	0.2765	downregulated	4	0.439682	0.6442	downregulated	1	2.26106	0.1042
neurological system process involved in regulation of systemic arterial blood pressure	GO	1 out of 7	1.38278									upregulated	2	2.82227	0.0595					upregulated	2	2.41573	0.0893	downregulated	1	1.38278	0.2509
glutathione transferase activity	GO	1 out of 7	1.37198	upregulated	2	2.62671	0.0723	upregulated	1	0.875166	0.4168	downregulated	1	3.82829	0.0217	downregulated	1	4.73817	0.0088	upregulated	3	2.23634	0.1068	downregulated	3	1.37198	0.2536
embryonic epithelial tube formation	GO	1 out of 7	1.37157	upregulated	3	0.771123	0.4625	upregulated	3	2.71154	0.0664	downregulated	11	6.21484	0.002	downregulated	4	0.951383	0.3862	upregulated	12	3.11192	0.0445	downregulated	7	1.37157	0.2537
fertilization	GO	4 out of 7	1.36419	upregulated	4	0.858719	0.4237					upregulated	5	2.48278	0.0835	upregulated	3	2.45492	0.0859	downregulated	22	2.2688	0.1034	upregulated	8	3.26304	0.0383	upregulated	2	3.43798	0.0321
positive regulation of actin cytoskeleton reorganization	GO	3 out of 7	1.34394	downregulated	1	2.52353	0.0802	downregulated	1	4.75278	0.0086	upregulated	1	1.39351	0.2482					downregulated	5	4.86061	0.0077	downregulated	2	2.36612	0.0938
interleukin-15-mediated signaling pathway	GO	2 out of 7	1.34368	downregulated	1	1.36403	0.2556					downregulated	1	0.833342	0.4346	upregulated	1	2.06642	0.1266	upregulated	1	1.34357	0.2609	downregulated	2	2.81821	0.0597
nucleotidyltransferase activity	GO	3 out of 7	1.33353	downregulated	3	0.622837	0.5364	upregulated	7	2.77275	0.0625	downregulated	10	1.42329	0.2409	downregulated	8	3.37588	0.0342	downregulated	22	3.13656	0.0434	downregulated	8	0.846238	0.429
Golgi transport complex	GO	2 out of 7	1.29379					downregulated	1	5.1454	0.0058	downregulated	1	0.684802	0.5042					downregulated	4	5.18504	0.0056	downregulated	2	1.93895	0.1439
lymphangiogenesis	GO	1 out of 7	1.26979	downregulated	1	2.55509	0.0777	upregulated	1	1.54732	0.2128	upregulated	1	1.67379	0.1875					downregulated	3	2.69391	0.0676	downregulated	1	1.26979	0.2809
parturition	GO	2 out of 7	1.2615									upregulated	2	2.71759	0.066	upregulated	1	2.49813	0.0822	downregulated	4	4.28572	0.0138	upregulated	2	3.95422	0.0192
beta-catenin-TCF complex assembly	GO	4 out of 7	1.26004	downregulated	2	1.61251	0.1994	upregulated	1	0.445951	0.6402	upregulated	2	1.72885	0.1775	upregulated	1	2.08721	0.124	upregulated	5	1.86028	0.1556	downregulated	1	0.470819	0.6245
positive regulation of cardiac muscle cell differentiation	GO	2 out of 7	1.24519	upregulated	2	4.21007	0.0148					downregulated	2	3.98046	0.0187	downregulated	2	3.12591	0.0439	downregulated	6	7.30597	0.0007	upregulated	1	3.16447	0.0422
semaphorin-plexin signaling pathway involved in neuron projection guidance	GO	2 out of 7	1.23662	downregulated	1	2.3986	0.0908					downregulated	3	2.03235	0.131					downregulated	2	0.855329	0.4251	downregulated	3	4.81224	0.0081
class I DNA-(apurinic or apyrimidinic site) endonuclease activity	GO	1 out of 7	1.23163	upregulated	1	1.23163	0.2918
positive regulation of non-canonical Wnt signaling pathway	GO	2 out of 7	1.19667	upregulated	1	2.22343	0.1082					downregulated	1	0.732131	0.4809					upregulated	1	1.06966	0.3431	downregulated	1	0.775029	0.4607
insulin receptor binding	GO	1 out of 7	1.16745	upregulated	2	2.76706	0.0628	upregulated	1	2.01078	0.1339	upregulated	2	1.78578	0.1677	downregulated	1	1.21769	0.2959	upregulated	6	5.90499	0.0027	downregulated	2	1.16745	0.3112
basal RNA polymerase II transcription machinery binding	GO	4 out of 7	1.16205	upregulated	2	0.783675	0.4567	upregulated	1	0.260314	0.7708	downregulated	5	1.04869	0.3504	downregulated	2	0.823242	0.439	downregulated	4	0.126604	0.8811	downregulated	3	1.86339	0.1551
regulation of non-motile cilium assembly	GO	2 out of 7	1.15888	upregulated	1	3.21338	0.0402	downregulated	1	1.30306	0.2717	downregulated	3	2.65854	0.0701	downregulated	2	2.10173	0.1222	downregulated	2	4.00883	0.0182
desmosome organization	GO	2 out of 7	1.12979	upregulated	1	2.01684	0.1331					downregulated	1	1.25852	0.2841					downregulated	1	0.371478	0.6897
GATOR2 complex	GO	2 out of 7	1.12281													downregulated	1	1.05818	0.3471	downregulated	1	1.13538	0.3213	downregulated	1	1.04562	0.3515
polysaccharide binding	GO	1 out of 7	1.1122					upregulated	1	1.22969	0.2924	upregulated	2	3.34443	0.0353					upregulated	1	0.117491	0.8891
translation initiation factor activity	GO	1 out of 7	1.08301	upregulated	2	0.27883	0.7567	upregulated	1	0.234622	0.7909	upregulated	1	0.458458	0.6323	downregulated	2	1.3408	0.2616	downregulated	9	1.14639	0.3178	downregulated	3	1.08301	0.3386
lipid transporter activity	GO	1 out of 7	1.07905	downregulated	4	1.20146	0.3008	upregulated	4	0.9702	0.379	downregulated	10	5.06257	0.0063	downregulated	8	7.31667	0.0007	upregulated	14	6.28819	0.0019	downregulated	12	2.91247	0.0543	upregulated	1	1.83342	0.1599
retina vasculature development in camera-type eye	GO	3 out of 7	1.07339	downregulated	1	2.45893	0.0855	upregulated	1	1.30981	0.2699	upregulated	2	3.40423	0.0332					upregulated	2	2.16729	0.1145	downregulated	1	0.98557	0.3732
sperm head	GO	2 out of 7	1.06735									upregulated	1	1.74857	0.174					downregulated	2	1.15433	0.3153	upregulated	1	1.83555	0.1595
enhancer sequence-specific DNA binding	GO	3 out of 7	1.04705	upregulated	3	2.97774	0.0509	downregulated	1	2.38937	0.0917	upregulated	3	0.873644	0.4174	downregulated	4	1.0914	0.3357	upregulated	11	1.01218	0.3634	downregulated	5	1.68861	0.1848
PcG protein complex	GO	3 out of 7	1.03567	downregulated	1	3.55339	0.0286	upregulated	3	4.31592	0.0134	downregulated	4	1.26538	0.2821	downregulated	1	0.367258	0.6926	downregulated	7	0.167552	0.8457	downregulated	5	1.73824	0.1758
mRNA cap binding complex	GO	1 out of 7	1.03236									upregulated	1	1.68158	0.1861	downregulated	1	2.51027	0.0812	downregulated	4	3.03714	0.048	downregulated	1	1.03236	0.3562
transcriptional activator activity, RNA polymerase II distal enhancer sequence-specific DNA binding	GO	2 out of 7	1.02458	upregulated	2	4.32718	0.0132					downregulated	3	1.80602	0.1643	downregulated	3	2.44945	0.0863	downregulated	3	1.61297	0.1993	downregulated	3	0.952878	0.3856
renal tubule development	GO	3 out of 7	1.01865	upregulated	7	6.23429	0.002	downregulated	3	2.2085	0.1099	downregulated	9	6.01341	0.0024	downregulated	5	2.9895	0.0503	downregulated	8	5.9431	0.0026	downregulated	1	0.0526728	0.9487
neurotrophin signaling pathway	GO	2 out of 7	1.01847	downregulated	1	1.62249	0.1974					downregulated	3	0.764908	0.4654	downregulated	1	1.0701	0.343	downregulated	6	3.59213	0.0275	downregulated	2	0.883839	0.4132
chemical homeostasis within a tissue	GO	2 out of 7	1.00851	downregulated	1	4.59911	0.0101					upregulated	1	1.95545	0.1415					upregulated	2	2.55737	0.0775	downregulated	2	6.20954	0.002
ovulation	GO	1 out of 7	0.98955									upregulated	1	2.71818	0.066					upregulated	3	1.72863	0.1775
NIK/NF-kappaB signaling	GO	4 out of 7	0.989162	upregulated	3	1.62635	0.1966	upregulated	1	2.83176	0.0589	upregulated	1	2.68256	0.0684	downregulated	3	1.81534	0.1628	upregulated	7	4.83498	0.0079	downregulated	1	0.498806	0.6073
positive regulation of TORC1 signaling	GO	2 out of 7	0.964004	downregulated	1	2.02457	0.1321	upregulated	1	2.81129	0.0601					downregulated	2	3.22903	0.0396	downregulated	3	3.40631	0.0332
TBP-class protein binding	GO	3 out of 7	0.953808	upregulated	3	2.07199	0.1259	upregulated	1	1.33686	0.2627					downregulated	2	1.43169	0.2389	downregulated	4	0.488898	0.6133	upregulated	2	1.51226	0.2204
regulation of double-strand break repair	GO	3 out of 7	0.928538	upregulated	4	0.921399	0.398	upregulated	3	1.95667	0.1413	upregulated	3	1.39102	0.2488	downregulated	4	1.9779	0.1384	upregulated	7	0.88993	0.4107	upregulated	1	0.472708	0.6233
negative regulation of peptidyl-lysine acetylation	GO	3 out of 7	0.905308	downregulated	1	3.38957	0.0337					upregulated	1	2.0275	0.1317	downregulated	1	0.586765	0.5561	downregulated	2	1.52351	0.2179	downregulated	1	1.33063	0.2643
positive regulation of transcription of nucleolar large rRNA by RNA polymerase I	GO	2 out of 7	0.904765					upregulated	1	1.1008	0.3326	downregulated	1	0.612888	0.5418	downregulated	1	1.11093	0.3293	downregulated	2	1.52779	0.217
inner cell mass cell proliferation	GO	1 out of 7	0.89056	upregulated	1	2.11849	0.1202	upregulated	1	3.58621	0.0277									downregulated	2	0.733603	0.4802	downregulated	1	0.89056	0.4104
regulation of establishment of cell polarity	GO	1 out of 7	0.869244	downregulated	1	1.43542	0.238					downregulated	3	1.7314	0.177					upregulated	3	1.80002	0.1653	downregulated	4	4.03607	0.0177
immunological synapse	GO	1 out of 7	0.868124	downregulated	1	0.991637	0.371	upregulated	1	1.79368	0.1663	downregulated	6	6.79312	0.0011	downregulated	3	5.26181	0.0052	upregulated	5	5.23981	0.0053	downregulated	2	0.868124	0.4197
neuropilin binding	GO	4 out of 7	0.864963	upregulated	1	1.74968	0.1738	upregulated	1	3.09808	0.0451	downregulated	5	8.70806	0.0002	downregulated	1	1.06907	0.3433	downregulated	3	2.60963	0.0736	downregulated	3	3.1847	0.0414
transcription factor activity, RNA polymerase II distal enhancer sequence-specific binding	GO	1 out of 7	0.859642	upregulated	2	2.43638	0.0875	downregulated	1	2.36299	0.0941	downregulated	11	3.55692	0.0285	downregulated	6	2.8768	0.0563	upregulated	18	4.89669	0.0075	downregulated	4	0.859642	0.4233
kinesin complex	GO	1 out of 7	0.857439	downregulated	2	4.33468	0.0131	upregulated	3	3.05365	0.0472	downregulated	7	4.97892	0.0069	downregulated	5	4.84822	0.0078	downregulated	12	4.85399	0.0078	downregulated	6	3.13484	0.0435	upregulated	1	2.2774	0.1026
maintenance of protein location in nucleus	GO	2 out of 7	0.832226	upregulated	2	1.27423	0.2796	upregulated	2	4.41148	0.0121	downregulated	2	0.930464	0.3944	downregulated	1	0.837446	0.4328	upregulated	2	0.865138	0.421	upregulated	1	2.22044	0.1086
phospholipid transporter activity	GO	1 out of 7	0.805704	downregulated	2	0.814728	0.4428	upregulated	2	1.953	0.1418	downregulated	4	3.26461	0.0382	downregulated	4	3.23379	0.0394	upregulated	10	8.02715	0.0003	downregulated	6	3.21512	0.0402	upregulated	1	2.40941	0.0899
osteoblast development	GO	1 out of 7	0.786416									downregulated	2	3.0981	0.0451					downregulated	1	0.789378	0.4541	downregulated	1	0.786416	0.4555
negative regulation of substrate adhesion-dependent cell spreading	GO	2 out of 7	0.778779	downregulated	1	1.84209	0.1585					upregulated	2	3.8713	0.0208	downregulated	1	1.16316	0.3125	upregulated	2	2.08207	0.1247	downregulated	2	1.9948	0.136
hemostasis	GO	2 out of 7	0.766343	downregulated	6	0.78585	0.4557	upregulated	13	5.53988	0.0039	downregulated	24	4.36445	0.0127	downregulated	14	3.76878	0.0231	upregulated	53	19.4477	3.6e-09	downregulated	21	4.14555	0.0158
ciliary transition fiber	GO	2 out of 7	0.759956	upregulated	1	1.83137	0.1602					upregulated	1	1.36295	0.2559	downregulated	2	2.43436	0.0877
aminoacyl-tRNA metabolism involved in translational fidelity	GO	1 out of 7	0.736977					downregulated	1	2.28286	0.102									downregulated	4	3.01983	0.0488
flagellated sperm motility	GO	3 out of 7	0.72771	upregulated	2	0.412849	0.6618	upregulated	3	1.11687	0.3273	downregulated	1	0.135962	0.8729	downregulated	1	0.204329	0.8152	upregulated	8	1.75026	0.1737	downregulated	4	1.28854	0.2757
RNA polymerase II distal enhancer sequence-specific DNA binding	GO	3 out of 7	0.727599	upregulated	3	3.33643	0.0356	downregulated	1	2.54451	0.0785	upregulated	3	1.05211	0.3492	downregulated	4	1.44068	0.2368	upregulated	10	0.636255	0.5293	downregulated	4	0.960502	0.3827
positive regulation of receptor binding	GO	2 out of 7	0.69723	downregulated	1	2.66811	0.0694					downregulated	1	1.4456	0.2356	upregulated	1	3.42947	0.0324	downregulated	2	4.67727	0.0093	upregulated	1	3.29581	0.037
adenohypophysis development	GO	1 out of 7	0.694798													upregulated	1	2.40584	0.0902	upregulated	2	1.71104	0.1807
dynein complex	GO	3 out of 7	0.681739	upregulated	2	1.27746	0.2787	upregulated	2	1.73608	0.1762	downregulated	4	2.16801	0.1144	upregulated	1	2.27185	0.1031	upregulated	8	2.43564	0.0875	upregulated	2	2.52309	0.0802
blastocyst growth	GO	1 out of 7	0.666494	upregulated	1	1.72983	0.1773	upregulated	1	3.17221	0.0419									downregulated	3	0.817501	0.4415	downregulated	1	0.666494	0.5135
replisome	GO	4 out of 7	0.646844	upregulated	2	2.05941	0.1275	upregulated	3	2.9886	0.0504	downregulated	3	1.97805	0.1383	downregulated	3	3.03116	0.0483	downregulated	3	0.306308	0.7362	downregulated	1	0.301737	0.7395
histone H3-K9 modification	GO	2 out of 7	0.645756	upregulated	2	2.34066	0.0963	upregulated	1	1.20028	0.3011					downregulated	1	1.14121	0.3194	upregulated	2	1.75397	0.1731
regulation of translation	GO	1 out of 7	0.645112	upregulated	15	0.545738	0.5794	upregulated	21	6.68247	0.0013	upregulated	14	2.54727	0.0783	downregulated	20	3.58786	0.0277	downregulated	56	2.18802	0.1121	downregulated	20	1.94494	0.143	upregulated	1	1.29983	0.2726
cell division site	GO	3 out of 7	0.632737	upregulated	6	2.27733	0.1026	upregulated	5	1.95608	0.1414	downregulated	5	3.80458	0.0223	downregulated	4	3.10139	0.045	upregulated	9	1.94942	0.1424	downregulated	10	5.25472	0.0052
regulation of cell proliferation involved in heart morphogenesis	GO	3 out of 7	0.623411	downregulated	1	1.03469	0.3553	upregulated	1	1.34779	0.2598	upregulated	3	5.01923	0.0066	downregulated	1	1.47326	0.2292	upregulated	5	4.13503	0.016	downregulated	1	0.899368	0.4068
DNA replication factor A complex	GO	1 out of 7	0.623009	upregulated	1	1.18687	0.3052	upregulated	1	0.97786	0.3761	downregulated	1	0.584345	0.5575	downregulated	1	0.912442	0.4015	downregulated	3	0.863252	0.4218	downregulated	1	0.623009	0.5363
modification-dependent protein binding	GO	4 out of 7	0.615696	upregulated	9	0.956239	0.3843	upregulated	12	4.00592	0.0182	upregulated	7	3.09726	0.0452	downregulated	14	6.33223	0.0018	downregulated	20	0.299512	0.7412	upregulated	5	1.41101	0.2439
midbrain development	GO	2 out of 7	0.607288	upregulated	2	0.970636	0.3788	downregulated	2	3.19151	0.0411	downregulated	9	4.7339	0.0088	downregulated	4	1.31143	0.2694	downregulated	15	8.6672	0.0002	downregulated	10	4.00809	0.0182	upregulated	1	2.83116	0.0589
maintenance of protein location in cell	GO	3 out of 7	0.59572	upregulated	5	3.44691	0.0318	upregulated	6	6.90128	0.001	downregulated	11	5.8569	0.0029	downregulated	6	6.00848	0.0025	upregulated	10	4.42269	0.012	downregulated	9	6.5356	0.0015
RNA phosphodiester bond hydrolysis	GO	3 out of 7	0.586125	upregulated	8	1.92231	0.1463	upregulated	15	13.1295	2e-06	downregulated	14	6.90587	0.001	downregulated	11	6.82179	0.0011	upregulated	11	1.83214	0.1601	downregulated	10	1.09416	0.3348
enteroendocrine cell differentiation	GO	3 out of 7	0.574489	upregulated	1	1.92653	0.1457					downregulated	2	2.73841	0.0647	upregulated	1	2.61145	0.0734	upregulated	1	2.35929	0.0945	downregulated	1	1.1342	0.3217
ATP-dependent DNA helicase activity	GO	1 out of 7	0.562669	upregulated	1	0.243285	0.784	upregulated	5	6.49018	0.0015	downregulated	3	0.786449	0.4555	downregulated	3	2.06254	0.1271	upregulated	4	0.19735	0.8209	downregulated	2	0.562669	0.5697
regulation of ceramide biosynthetic process	GO	3 out of 7	0.548035					upregulated	1	0.952224	0.3859	upregulated	1	2.11476	0.1207	downregulated	1	1.24194	0.2888	upregulated	2	4.07201	0.017	downregulated	2	2.79499	0.0611
PERK-mediated unfolded protein response	GO	2 out of 7	0.546004					downregulated	1	1.71629	0.1797	upregulated	2	4.11542	0.0163					downregulated	1	1.24462	0.288	upregulated	2	3.09775	0.0452
keratinization	GO	3 out of 7	0.539536	downregulated	3	1.93196	0.1449	downregulated	2	2.94841	0.0524	upregulated	2	1.64584	0.1929	upregulated	2	1.45288	0.2339	downregulated	5	2.78617	0.0617	upregulated	8	0.464978	0.6281
ATP-dependent microtubule motor activity, plus-end-directed	GO	2 out of 7	0.534364					upregulated	1	1.74748	0.1742	downregulated	2	0.719213	0.4871	downregulated	1	0.710085	0.4916	upregulated	3	3.71031	0.0245	downregulated	5	3.92649	0.0197
regulation of cellular response to drug	GO	2 out of 7	0.517254	downregulated	2	1.58603	0.2047	upregulated	2	4.4119	0.0121	downregulated	4	4.01536	0.018	downregulated	1	1.88058	0.1525	upregulated	6	3.36016	0.0347	downregulated	3	6.94749	0.001
mRNA cleavage factor complex	GO	1 out of 7	0.514638	upregulated	2	1.27409	0.2797	upregulated	1	0.684512	0.5043	downregulated	3	1.50301	0.2225	downregulated	1	1.13293	0.3221	upregulated	1	0.0673452	0.9349	downregulated	1	0.514638	0.5977
glutathione peroxidase activity	GO	1 out of 7	0.512843					upregulated	1	1.00064	0.3676	downregulated	1	3.98922	0.0185	downregulated	1	4.90008	0.0074	upregulated	3	4.05486	0.0173	downregulated	1	0.512843	0.5988
blood vessel remodeling	GO	1 out of 7	0.512236	upregulated	4	6.05405	0.0023	upregulated	1	0.810341	0.4447	downregulated	2	1.77146	0.1701	downregulated	1	0.919101	0.3989	upregulated	6	6.23161	0.002	downregulated	1	0.512236	0.5992
mRNA cleavage involved in mRNA processing	GO	3 out of 7	0.489945					upregulated	1	1.2631	0.2828	upregulated	1	1.68158	0.1861	downregulated	1	1.78298	0.1681	downregulated	1	0.257585	0.7729	downregulated	1	0.752235	0.4713
chemosensory behavior	GO	1 out of 7	0.486948	downregulated	1	2.08746	0.124					downregulated	1	0.533206	0.5867					downregulated	5	6.42713	0.0016	downregulated	3	3.10761	0.0447
structural constituent of eye lens	GO	1 out of 7	0.482225									downregulated	1	2.09496	0.1231	upregulated	1	2.03509	0.1307	upregulated	2	2.30948	0.0993	downregulated	1	0.482225	0.6174
polysome	GO	1 out of 7	0.469829	upregulated	2	0.370377	0.6905	upregulated	2	1.14056	0.3196	upregulated	3	1.72701	0.1778	upregulated	1	1.18517	0.3057	upregulated	3	2.11785	0.1203	downregulated	4	0.469829	0.6251
carbohydrate transmembrane transporter activity	GO	3 out of 7	0.466547	upregulated	2	2.24609	0.1058					downregulated	2	3.678	0.0253	downregulated	3	6.4566	0.0016	downregulated	9	4.88219	0.0076	downregulated	3	3.47286	0.031
phosphatidylserine acyl-chain remodeling	GO	1 out of 7	0.405538					downregulated	1	1.27827	0.2785	downregulated	1	1.36095	0.2564					downregulated	2	1.83044	0.1603	downregulated	2	3.04476	0.0476
regulation of axon guidance	GO	3 out of 7	0.385058	downregulated	2	4.13406	0.016	upregulated	2	2.22494	0.1081	downregulated	5	5.28065	0.0051	downregulated	2	1.60833	0.2002	downregulated	9	3.23519	0.0394	downregulated	7	5.94797	0.0026
embryonic brain development	GO	1 out of 7	0.374365									downregulated	1	0.635024	0.5299					downregulated	1	1.00939	0.3644
damaged DNA binding	GO	1 out of 7	0.359752	upregulated	5	1.93234	0.1448	upregulated	6	7.82833	0.0004	downregulated	7	3.76026	0.0233	downregulated	4	1.73716	0.176	downregulated	10	1.04804	0.3506	downregulated	3	0.359752	0.6978
organic acid transmembrane transporter activity	GO	1 out of 7	0.33387	upregulated	8	3.15689	0.0426	upregulated	2	2.18192	0.1128	upregulated	4	5.3086	0.0049	downregulated	6	4.14693	0.0158	downregulated	26	7.04733	0.0009	downregulated	13	2.94354	0.0527	upregulated	1	2.60967	0.0736
pteridine-containing compound metabolic process	GO	3 out of 7	0.333301	downregulated	2	1.87255	0.1537	upregulated	3	5.17894	0.0056	downregulated	6	2.72442	0.0656	downregulated	2	1.20841	0.2987	downregulated	5	0.173076	0.8411	downregulated	1	0.786665	0.4554
RNA helicase activity	GO	1 out of 7	0.329632	upregulated	2	0.590479	0.5541	downregulated	1	1.10549	0.331	downregulated	1	0.0461803	0.9549	upregulated	1	0.973723	0.3777	upregulated	2	0.606888	0.545	downregulated	2	0.329632	0.7192
ruffle assembly	GO	3 out of 7	0.328977	upregulated	1	1.95865	0.141	upregulated	1	1.57393	0.2072	downregulated	1	0.543173	0.5809	downregulated	1	1.37977	0.2516	upregulated	3	3.84062	0.0215	downregulated	2	2.55996	0.0773
cytoplasm organization	GO	1 out of 7	0.320761	upregulated	1	1.06693	0.3441					downregulated	1	0.746164	0.4742					upregulated	2	2.30579	0.0997
homologous recombination	GO	4 out of 7	0.303941	upregulated	2	0.951561	0.3861	upregulated	3	1.79158	0.1667	downregulated	2	1.34121	0.2615	downregulated	2	2.36823	0.0936	downregulated	6	0.456079	0.6338	downregulated	2	0.814163	0.443
DNA helicase activity	GO	1 out of 7	0.288599	upregulated	2	0.552895	0.5753	upregulated	7	7.73611	0.0004	downregulated	4	0.948501	0.3873	downregulated	3	1.57791	0.2064	upregulated	4	0.0722869	0.9303	downregulated	2	0.288599	0.7493
helicase activity	GO	1 out of 7	0.268802	downregulated	1	0.369073	0.6914	upregulated	14	8.40174	0.0002	downregulated	11	0.89693	0.4078	downregulated	8	1.81673	0.1626	upregulated	11	0.331421	0.7179	downregulated	6	0.268802	0.7643
autophagosome maturation	GO	4 out of 7	0.253324	upregulated	2	1.68511	0.1854	upregulated	2	1.67008	0.1882	downregulated	2	3.14007	0.0433	downregulated	2	3.00353	0.0496	downregulated	5	1.65638	0.1908	downregulated	2	1.38535	0.2502
regulation of early endosome to late endosome transport	GO	3 out of 7	0.203794	upregulated	2	2.55361	0.0778	upregulated	1	0.904334	0.4048	downregulated	1	0.594758	0.5517	downregulated	1	0.535548	0.5853	upregulated	3	4.06678	0.0171	downregulated	2	1.94294	0.1433
blood coagulation	GO	2 out of 7	0.171819	downregulated	6	0.8	0.4493	upregulated	13	5.57395	0.0038	downregulated	24	4.40117	0.0123	downregulated	14	3.87733	0.0207	upregulated	52	17.9441	1.6e-08	downregulated	20	3.67637	0.0253
xenobiotic metabolic process	GO	3 out of 7	0.147049	upregulated	4	0.498111	0.6077	upregulated	1	0.0780723	0.9249	downregulated	5	0.398796	0.6711	upregulated	2	1.88269	0.1522	upregulated	8	1.42735	0.2399	upregulated	4	1.91303	0.1476
FAD binding	GO	4 out of 7	0.124003	downregulated	1	1.09998	0.3329	downregulated	3	6.73311	0.0012	upregulated	1	1.25898	0.2839	upregulated	2	3.65798	0.0258	downregulated	3	1.54025	0.2143	downregulated	2	1.49989	0.2232
meiosis I	GO	2 out of 7	0.120256	upregulated	4	0.798448	0.45	upregulated	8	4.37802	0.0126	downregulated	6	1.7614	0.1718	downregulated	4	1.57158	0.2077	downregulated	10	0.0777193	0.9252	upregulated	1	1.72322	0.1785
ATP-dependent RNA helicase activity	GO	1 out of 7	0.120133	upregulated	1	0.288662	0.7493	downregulated	1	1.23284	0.2915	downregulated	1	0.0728783	0.9297	upregulated	1	1.0966	0.334	upregulated	1	0.042044	0.9588	downregulated	1	0.120133	0.8868
positive regulation of extrinsic apoptotic signaling pathway in absence of ligand	GO	3 out of 7	0.115521	upregulated	1	0.729254	0.4823	upregulated	1	3.18324	0.0415	downregulated	1	1.27562	0.2793	downregulated	1	1.62593	0.1967	upregulated	4	3.02484	0.0486	downregulated	2	2.12942	0.1189
lymphocyte homeostasis	GO	1 out of 7	0.113517	upregulated	1	3.20113	0.0407					downregulated	5	4.23816	0.0144	downregulated	4	6.1017	0.0022	upregulated	7	1.2684	0.2813	downregulated	1	0.113517	0.8927
immunoglobulin production	GO	1 out of 7	0.0860329	downregulated	2	0.858231	0.4239	downregulated	1	0.76169	0.4669	downregulated	5	3.32182	0.0361	downregulated	5	3.02412	0.0486	upregulated	8	2.83922	0.0585	downregulated	1	0.0860329	0.9176
meiotic cell cycle	GO	3 out of 7	0.0538335	upregulated	8	0.763196	0.4662	upregulated	11	3.30276	0.0368	downregulated	13	1.71834	0.1794	downregulated	8	1.34151	0.2615	downregulated	24	0.105062	0.9003	upregulated	3	1.05734	0.3474
regulation of cilium assembly	GO	2 out of 7	0.0323713	upregulated	5	1.66961	0.1883	downregulated	2	1.46987	0.23	downregulated	9	2.21826	0.1088	downregulated	3	0.493023	0.6108	downregulated	11	2.42006	0.0889	downregulated	6	1.79347	0.1664
DNA repair	GO	1 out of 7	0.0263037	upregulated	30	2.97728	0.0509	upregulated	30	10.8195	2e-05	downregulated	32	2.09329	0.1233	downregulated	25	4.833	0.008	downregulated	64	0.135451	0.8733	downregulated	27	0.709864	0.4917	upregulated	1	0.68356	0.5048
development of primary female sexual characteristics	GO	3 out of 7	0.0186397	downregulated	3	2.36074	0.0944	upregulated	2	1.59347	0.2032	upregulated	4	2.7793	0.0621	downregulated	4	1.62113	0.1977	upregulated	13	3.06194	0.0468	downregulated	6	2.68968	0.0679
negative regulation of viral release from host cell	GO	4 out of 7	0.00621962	upregulated	2	1.68551	0.1854	upregulated	1	0.747067	0.4738									downregulated	2	0.165368	0.8476	downregulated	1	0.661872	0.5159	upregulated	1	3.2536	0.0386
steroid hydroxylase activity	GO	1 out of 7	0.00204553									downregulated	1	0.772558	0.4618					upregulated	2	0.0781162	0.9249	downregulated	1	0.852719	0.4263
