# Supplementary material for: Physical Activity Rewires the Human Brain against Neurodegeneration
Source: Int J Mol Sci. 2022 Jun 2;23(11):6223. doi: 10.3390/ijms23116223 (PMC9181322; doi:10.3390/ijms23116223)
Supplement: Supplementary file 1 [file ijms-23-06223-s001.zip › Table S9.xlsx]

## Sheet: Sheet1
Table S9. Functional analysis of genes downregulated in physically active subjects and upregulated in Alzheimer's disease datasets
Bioset 1: Hippocampi from 76-99yr old female subjects with high physical activity levels _vs_ low (Study: Hippocampi from post-mortem brains of subjects with low, moderate, or high physical activity levels)
Bioset 2: Hippocampi from 76-99yr old female subjects with moderate physical activity levels _vs_ low (Study: Hippocampi from post-mortem brains of subjects with low, moderate, or high physical activity levels)
Bioset 3: Hippocampi from 78-101yr old male subjects with high physical activity levels _vs_ low (Study: Hippocampi from post-mortem brains of subjects with low, moderate, or high physical activity levels)
Bioset 4: Hippocampi from 78-101yr old male subjects with moderate physical activity levels _vs_ low (Study: Hippocampi from post-mortem brains of subjects with low, moderate, or high physical activity levels)
Bioset 5: Hippocampuses from brains of post-mortem Alzheimer's disease patients _vs_ normal donors (Study: Alzheimers disease entorhinal cortexes, hippocampuses, and post central and superior frontal gyruses)
Bioset 6: Hippocampus gray matter of individuals with AD _vs_ without AD (Study: Frontal cortex, hippocampus, and temporal lobe gray matter of Alzheimer's disease patients)
Bioset 7: Hippocampus of patients with definite Alzheimers disease _vs_ normal_GPL97 (Study: Brain regions from patients with dementia and Alzheimer's disease)
Biogroup	Source	Specificity	Overall Biogroup score	Correlated direction - Bioset 1	Common genes - Bioset 1	Score - Bioset 1	p-value - Bioset 1	Correlated direction - Bioset 2	Common genes - Bioset 2	Score - Bioset 2	p-value - Bioset 2	Correlated direction - Bioset 3	Common genes - Bioset 3	Score - Bioset 3	p-value - Bioset 3	Correlated direction - Bioset 4	Common genes - Bioset 4	Score - Bioset 4	p-value - Bioset 4	Correlated direction - Bioset 5	Common genes - Bioset 5	Score - Bioset 5	p-value - Bioset 5	Correlated direction - Bioset 6	Common genes - Bioset 6	Score - Bioset 6	p-value - Bioset 6	Correlated direction - Bioset 7	Common genes - Bioset 7	Score - Bioset 7	p-value - Bioset 7
leukocyte degranulation	GO	5 out of 7	122.848	downregulated	6	0.519363	0.5949	upregulated	25	4.61489	0.0099	downregulated	59	30.4946	5.7e-14	downregulated	60	66.9198	8.7e-30	upregulated	83	33.1919	3.8e-15	downregulated	39	4.08009	0.0169	upregulated	1	0.41706	0.659
blood vessel morphogenesis	GO	6 out of 7	77.255	downregulated	13	2.4238	0.0886	upregulated	13	3.48882	0.0305	downregulated	45	19.0097	5.5e-09	downregulated	28	9.91303	5e-05	upregulated	73	38.7789	1.4e-17	upregulated	20	9.30351	9.1e-05	upregulated	2	1.31488	0.2685
positive regulation of leukocyte cell-cell adhesion	GO	6 out of 7	76.7419	downregulated	8	1.95585	0.1414	downregulated	4	3.76929	0.0231	downregulated	26	14.514	5e-07	downregulated	20	23.9426	4e-11	upregulated	43	23.6909	5.1e-11	upregulated	9	8.86929	0.0001
cardiovascular system development	GO	6 out of 7	73.6872	downregulated	17	2.50308	0.0818	upregulated	16	2.65822	0.0701	downregulated	50	14.6237	4.5e-07	downregulated	32	8.42516	0.0002	upregulated	87	40.5614	2.4e-18	upregulated	25	9.28007	9.3e-05	upregulated	2	0.952088	0.3859
extracellular structure organization	GO	5 out of 7	68.252	downregulated	10	1.33889	0.2621	upregulated	10	1.65765	0.1906	downregulated	28	5.65973	0.0035	downregulated	18	9.22855	9.8e-05	upregulated	71	41.6605	8.1e-19	upregulated	16	12.022	6e-06
extracellular matrix organization	GO	5 out of 7	66.8921	downregulated	10	1.80122	0.1651	upregulated	7	0.997439	0.3688	downregulated	25	6.751	0.0012	downregulated	16	8.42586	0.0002	upregulated	64	37.7437	4.1e-17	upregulated	14	13.1678	1.9e-06
lymphocyte activation	GO	6 out of 7	66.8453	downregulated	13	2.24178	0.1063	upregulated	7	1.96475	0.1402	downregulated	40	20.7237	1e-09	downregulated	29	19.4164	3.7e-09	upregulated	55	19.1826	4.7e-09	upregulated	14	3.84778	0.0213	upregulated	1	3.39788	0.0334
wound healing	GO	5 out of 7	66.4913	upregulated	11	0.90325	0.4053	upregulated	17	4.64768	0.0096	downregulated	42	10.1913	3.7e-05	downregulated	24	8.69604	0.0002	upregulated	92	45.4293	1.9e-20	upregulated	21	7.37129	0.0006	upregulated	1	0.354335	0.7016
peptide antigen binding	GO	4 out of 7	66.2527	upregulated	1	6.57729	0.0014	upregulated	1	0.809985	0.4449	downregulated	9	21.5123	4.5e-10	downregulated	7	26.2539	4e-12	upregulated	14	23.189	8.5e-11	upregulated	2	2.68474	0.0682
regulation of lymphocyte activation	GO	5 out of 7	65.0946	upregulated	7	1.42777	0.2398	downregulated	6	2.22099	0.1085	downregulated	46	16.7567	5.3e-08	downregulated	28	18.5696	8.6e-09	upregulated	76	25.3979	9.3e-12	upregulated	16	3.57714	0.028
inflammatory response	GO	4 out of 7	63.2784	downregulated	14	2.78345	0.0618	upregulated	9	3.8379	0.0215	downregulated	46	19.6906	2.8e-09	downregulated	33	37.1568	7.3e-17	upregulated	83	39.406	7.7e-18	upregulated	17	7.48542	0.0006
regulation of vasculature development	GO	5 out of 7	62.5555	downregulated	11	5.26791	0.0052	upregulated	8	4.23607	0.0145	downregulated	29	14.1314	7.3e-07	downregulated	17	11.6943	8.3e-06	upregulated	59	29.9432	9.9e-14	upregulated	11	5.75473	0.0032
positive regulation of cell motility	GO	4 out of 7	61.1471	downregulated	14	5.25652	0.0052	upregulated	16	5.63097	0.0036	downregulated	46	14.8709	3.5e-07	downregulated	27	8.43898	0.0002	upregulated	87	42.4284	3.7e-19	downregulated	35	4.21673	0.0147
regulation of angiogenesis	GO	5 out of 7	61.0783	downregulated	10	5.93228	0.0027	upregulated	7	4.66838	0.0094	downregulated	26	13.8144	1e-06	downregulated	14	11.9573	6.4e-06	upregulated	55	28.0893	6.3e-13	upregulated	10	5.95338	0.0026
positive regulation of cellular component movement	GO	4 out of 7	60.8491	downregulated	14	5.18043	0.0056	upregulated	16	5.48183	0.0042	downregulated	47	14.9477	3.2e-07	downregulated	27	8.12187	0.0003	upregulated	89	42.2695	4.4e-19	downregulated	36	4.18866	0.0152
external side of plasma membrane	GO	6 out of 7	57.4393	downregulated	6	1.10836	0.3301	upregulated	7	4.81451	0.0081	downregulated	24	10.8146	2e-05	downregulated	18	11.4965	1e-05	upregulated	48	26.8458	2.2e-12	upregulated	17	8.338	0.0002	upregulated	2	3.65055	0.026
regulation of hemopoiesis	GO	5 out of 7	56.8751	upregulated	7	0.909335	0.4028	upregulated	8	3.37372	0.0343	downregulated	38	7.87607	0.0004	downregulated	23	9.84954	5.3e-05	upregulated	85	39.6501	6e-18	upregulated	14	3.32045	0.0361	upregulated	1	0.46195	0.6301
leukocyte migration	GO	5 out of 7	55.8227	downregulated	5	0.583517	0.5579	upregulated	13	6.15525	0.0021	downregulated	29	12.3454	4.3e-06	downregulated	19	16.6218	6e-08	upregulated	54	23.6675	5.3e-11	upregulated	16	8.75967	0.0002
myeloid cell differentiation	GO	7 out of 7	55.7156	downregulated	6	4.02173	0.0179	downregulated	2	3.79939	0.0224	downregulated	23	10.435	2.9e-05	downregulated	15	10.2073	3.7e-05	upregulated	41	23.9512	4e-11	upregulated	8	2.18264	0.1127	upregulated	1	1.11831	0.3268
membrane microdomain	GO	3 out of 7	55.4596	upregulated	7	2.6531	0.0704	upregulated	8	6.66245	0.0013	downregulated	30	14.075	7.7e-07	downregulated	29	19.2831	4.2e-09	upregulated	62	37.7854	3.9e-17	downregulated	29	6.3683	0.0017
membrane raft	GO	3 out of 7	55.4596	upregulated	7	2.6531	0.0704	upregulated	8	6.66245	0.0013	downregulated	30	14.075	7.7e-07	downregulated	29	19.2831	4.2e-09	upregulated	62	37.7854	3.9e-17	downregulated	29	6.3683	0.0017
peptide binding	GO	4 out of 7	55.2994	upregulated	10	5.09996	0.0061	upregulated	9	1.7587	0.1723	downregulated	25	18.3452	1.1e-08	downregulated	23	24.2455	3e-11	upregulated	49	21.1461	6.6e-10	downregulated	27	5.2419	0.0053	upregulated	1	3.66315	0.0257
blood microparticle	GO	5 out of 7	51.3965	downregulated	3	0.853382	0.426	upregulated	2	0.0902197	0.9137	downregulated	9	7.2562	0.0007	downregulated	5	7.23862	0.0007	upregulated	26	30.6306	5e-14	upregulated	6	5.50795	0.0041
actin-based cell projection	GO	7 out of 7	51.052	downregulated	4	5.0596	0.0063	downregulated	3	2.341	0.0962	downregulated	20	5.18371	0.0056	downregulated	11	8.02777	0.0003	upregulated	38	19.2656	4.3e-09	upregulated	14	9.18561	0.0001	upregulated	1	1.98878	0.1369
glial cell differentiation	GO	4 out of 7	50.1729	downregulated	4	1.42211	0.2412	upregulated	4	1.31221	0.2692	downregulated	31	31.9491	1.3e-14	downregulated	10	3.89301	0.0204	upregulated	30	15.9585	1.2e-07	downregulated	11	1.73764	0.1759
regulation of inflammatory response	GO	5 out of 7	49.6565	upregulated	6	1.25524	0.285	upregulated	13	4.41765	0.0121	downregulated	21	4.64552	0.0096	downregulated	24	13.8033	1e-06	upregulated	57	32.4723	7.9e-15	upregulated	12	3.44759	0.0318	upregulated	1	0.960666	0.3826
Golgi-associated vesicle membrane	GO	5 out of 7	49.0714	upregulated	5	5.21767	0.0054	downregulated	3	1.64218	0.1936	downregulated	13	15.4247	2e-07	downregulated	11	18.6396	8e-09	upregulated	21	14.472	5.2e-07	upregulated	8	4.11068	0.0164
T cell activation	GO	6 out of 7	46.8461	downregulated	7	2.3075	0.0995	upregulated	5	2.85715	0.0574	downregulated	25	13.8299	9.9e-07	downregulated	17	13.2904	1.7e-06	upregulated	35	12.4628	3.9e-06	upregulated	8	3.88989	0.0204	upregulated	1	3.92275	0.0198
regulation of ossification	GO	4 out of 7	45.2647	upregulated	7	1.5203	0.2186	upregulated	6	2.00464	0.1347	downregulated	12	3.49245	0.0304	downregulated	7	1.86599	0.1547	upregulated	45	38.0344	3e-17	upregulated	7	3.39209	0.0336
cell-substrate adhesion	GO	4 out of 7	45.114	upregulated	5	1.46936	0.2301	upregulated	4	2.54803	0.0782	downregulated	13	1.93415	0.1445	downregulated	10	7.5313	0.0005	upregulated	39	25.1029	1.3e-11	upregulated	11	14.5631	4.7e-07
axon ensheathment	GO	4 out of 7	44.6171	upregulated	1	2.57059	0.0765	downregulated	3	2.22616	0.1079	downregulated	26	34.0671	1.6e-15	downregulated	11	10.836	2e-05	upregulated	17	8.63943	0.0002	downregulated	15	8.58101	0.0002
growth factor binding	GO	6 out of 7	44.4067	downregulated	6	2.89058	0.0555	upregulated	6	2.09738	0.1228	downregulated	9	5.67007	0.0034	downregulated	6	3.0573	0.047	upregulated	37	29.3817	1.7e-13	upregulated	6	4.18337	0.0152	upregulated	1	1.32103	0.2669
extracellular matrix	GO	5 out of 7	44.1817	downregulated	14	3.33402	0.0356	upregulated	9	1.66654	0.1889	downregulated	18	3.37869	0.0341	upregulated	1	0.399518	0.6706	upregulated	72	33.2001	3.8e-15	upregulated	17	5.67611	0.0034	upregulated	1	0.658823	0.5175
antigen processing and presentation	GO	3 out of 7	43.7843	upregulated	6	4.88943	0.0075	upregulated	10	2.1832	0.1127	downregulated	22	18.9009	6.2e-09	downregulated	19	21.3725	5.2e-10	upregulated	31	16.0853	1e-07	downregulated	20	5.50176	0.0041
antigen processing and presentation of exogenous antigen	GO	3 out of 7	43.7317	upregulated	4	5.16823	0.0057	upregulated	8	2.15336	0.1161	downregulated	20	21.016	7.5e-10	downregulated	18	22.8964	1.1e-10	upregulated	25	13.8952	9.2e-07	downregulated	19	6.75425	0.0012
antigen processing and presentation of peptide antigen	GO	3 out of 7	43.2028	upregulated	4	5.04156	0.0065	upregulated	9	2.26451	0.1039	downregulated	20	20.3684	1.4e-09	downregulated	18	22.6633	1.4e-10	upregulated	26	13.8984	9.2e-07	downregulated	19	6.42115	0.0016
myelination	GO	3 out of 7	42.3385	upregulated	1	2.61705	0.073	upregulated	2	0.881783	0.414	downregulated	26	34.7313	8.2e-16	downregulated	11	11.1437	1.4e-05	upregulated	17	8.90756	0.0001	downregulated	15	8.94525	0.0001
gliogenesis	GO	4 out of 7	41.8135	downregulated	4	1.24104	0.2891	upregulated	6	4.37552	0.0126	downregulated	34	29.1351	2.2e-13	downregulated	12	3.3522	0.035	upregulated	37	18.3462	1.1e-08	downregulated	20	5.88554	0.0028
endosome membrane	GO	4 out of 7	41.4825	upregulated	21	3.85013	0.0213	upregulated	22	4.64633	0.0096	downregulated	51	22.6876	1.4e-10	downregulated	44	24.4488	2.4e-11	upregulated	64	16.7788	5.2e-08	downregulated	54	15.7885	1.4e-07	upregulated	2	1.85228	0.1569
regulation of complement activation	GO	5 out of 7	41.3348	downregulated	2	1.44843	0.2349					downregulated	4	2.62622	0.0724	downregulated	4	9.96954	4.7e-05	upregulated	16	25.9949	5.1e-12	upregulated	3	1.29575	0.2737
lamellipodium	GO	4 out of 7	41.2393	downregulated	7	4.67668	0.0093	upregulated	8	1.45963	0.2323	downregulated	19	2.9251	0.0537	downregulated	16	7.84176	0.0004	upregulated	51	39.2312	9.2e-18	downregulated	28	11.9759	6.3e-06
response to ketone	GO	6 out of 7	41.2229	downregulated	4	4.93239	0.0072	upregulated	8	3.47385	0.031	downregulated	11	3.18543	0.0414	downregulated	12	5.28818	0.0051	upregulated	36	23.0903	9.4e-11	upregulated	12	5.81024	0.003	upregulated	2	2.39015	0.0916
regulation of bone remodeling	GO	6 out of 7	40.9683	downregulated	1	0.662282	0.5157					downregulated	6	11.9303	6.6e-06	downregulated	5	9.99446	4.6e-05	upregulated	9	7.96368	0.0003	upregulated	2	5.51831	0.004	upregulated	1	4.89923	0.0075
regulation of I-kappaB kinase/NF-kappaB signaling	GO	6 out of 7	40.3517	downregulated	5	0.415649	0.6599	upregulated	11	6.47006	0.0015	downregulated	17	4.89998	0.0074	downregulated	13	3.03489	0.0481	upregulated	51	29.7088	1.3e-13	upregulated	11	3.39804	0.0334	upregulated	3	5.36437	0.0047
cartilage development	GO	5 out of 7	40.143	downregulated	8	2.39708	0.091	upregulated	5	3.60208	0.0273	downregulated	7	0.972632	0.3781	downregulated	5	3.43283	0.0323	upregulated	35	27.974	7.1e-13	upregulated	9	8.96854	0.0001
macrophage activation	GO	4 out of 7	39.8709	downregulated	1	0.711751	0.4908	upregulated	4	10.9457	1.8e-05	downregulated	6	8.34635	0.0002	downregulated	9	26.4771	3.2e-12	upregulated	14	16.3326	8.1e-08	downregulated	2	1.05131	0.3495
specific granule membrane	GO	5 out of 7	39.3887	downregulated	2	0.527553	0.59	upregulated	4	1.37002	0.2541	downregulated	15	17.0794	3.8e-08	downregulated	14	17.5727	2.3e-08	upregulated	19	6.14782	0.0021	downregulated	7	2.23175	0.1073	upregulated	1	1.66299	0.1896
regulation of response to wounding	GO	5 out of 7	39.0822	downregulated	6	1.66597	0.189	upregulated	9	4.83061	0.008	downregulated	16	8.88271	0.0001	downregulated	12	6.81691	0.0011	upregulated	29	15.6797	1.6e-07	upregulated	6	10.8675	1.9e-05
regulation of peptidyl-tyrosine phosphorylation	GO	4 out of 7	38.7642	downregulated	5	1.45844	0.2326	upregulated	8	1.47955	0.2277	downregulated	20	9.36801	8.5e-05	downregulated	21	14.8109	3.7e-07	upregulated	37	21.1809	6.3e-10	downregulated	23	6.57455	0.0014
receptor complex	GO	4 out of 7	38.1061	upregulated	20	5.30089	0.005	upregulated	7	3.4619	0.0314	downregulated	37	18.6737	7.8e-09	downregulated	26	21.7876	3.4e-10	upregulated	68	31.3677	2.4e-14	downregulated	54	28.2559	5.4e-13	upregulated	2	3.29572	0.037
glial cell development	GO	3 out of 7	38.0665	upregulated	1	0.272221	0.7617	upregulated	2	1.61026	0.1998	downregulated	19	25.3073	1e-11	downregulated	8	4.94178	0.0071	upregulated	17	11.0062	1.7e-05	downregulated	6	1.30634	0.2708
lymphocyte differentiation	GO	5 out of 7	37.7011	downregulated	8	1.59258	0.2034	upregulated	3	2.78424	0.0618	downregulated	27	11.9609	6.4e-06	downregulated	14	8.79026	0.0002	upregulated	36	14.2879	6.2e-07	upregulated	7	3.85361	0.0212
transcriptional repressor activity, RNA polymerase II transcription regulatory region sequence-specific DNA binding	GO	7 out of 7	37.6316	downregulated	7	0.563373	0.5693	downregulated	12	8.55513	0.0002	downregulated	22	2.78566	0.0617	downregulated	19	4.47884	0.0113	upregulated	41	16.0092	1.1e-07	upregulated	8	4.38629	0.0124	upregulated	1	0.853124	0.4261
collagen-containing extracellular matrix	GO	3 out of 7	37.5589	downregulated	7	2.3905	0.0916	upregulated	6	1.40656	0.245	upregulated	7	4.18556	0.0152	upregulated	1	0.660962	0.5164	upregulated	55	33.837	2e-15	upregulated	12	7.58447	0.0005
defense response to other organism	GO	5 out of 7	36.7998	downregulated	12	2.30809	0.0995	upregulated	20	10.5651	2.6e-05	downregulated	28	6.71458	0.0012	downregulated	21	12.2416	4.8e-06	upregulated	67	26.0017	5.1e-12	upregulated	11	0.0989002	0.9058
cell adhesion molecule binding	GO	3 out of 7	36.7542	upregulated	15	0.660364	0.5167	upregulated	16	1.14391	0.3186	downregulated	42	6.21114	0.002	downregulated	29	5.14738	0.0058	upregulated	89	39.6136	6.3e-18	downregulated	51	12.4136	4.1e-06
reproductive structure development	GO	6 out of 7	36.4243	downregulated	13	5.33891	0.0048	upregulated	12	3.56017	0.0284	downregulated	26	4.55242	0.0105	downregulated	26	5.75931	0.0032	upregulated	61	19.0211	5.5e-09	upregulated	15	3.28242	0.0375	upregulated	2	2.03033	0.1313
ensheathment of neurons	GO	3 out of 7	35.9777	upregulated	1	2.57059	0.0765	downregulated	3	2.22616	0.1079	downregulated	26	34.0671	1.6e-15	downregulated	11	10.836	2e-05	upregulated	17	8.63943	0.0002	downregulated	15	8.58101	0.0002
reproductive system development	GO	6 out of 7	35.9451	downregulated	13	5.31019	0.0049	upregulated	12	3.54102	0.029	downregulated	26	4.47979	0.0113	downregulated	26	5.66994	0.0034	upregulated	61	18.732	7.3e-09	upregulated	15	3.27499	0.0378	upregulated	2	2.01921	0.1328
cytokine binding	GO	5 out of 7	35.8956	downregulated	4	1.9936	0.1362	upregulated	4	2.15071	0.1164	downregulated	9	4.64156	0.0096	downregulated	4	2.81862	0.0597	upregulated	34	26.4597	3.2e-12	downregulated	5	2.4046	0.0903	upregulated	2	4.53738	0.0107
amyloid-beta clearance	GO	3 out of 7	35.8585									downregulated	4	11.0243	1.6e-05	downregulated	4	15.5365	1.8e-07	upregulated	5	9.29781	9.2e-05
connective tissue development	GO	5 out of 7	35.2432	downregulated	9	2.12057	0.12	upregulated	5	3.34669	0.0352	downregulated	9	0.806983	0.4462	downregulated	6	2.96619	0.0515	upregulated	40	25.1087	1.2e-11	upregulated	9	7.58747	0.0005
negative regulation of leukocyte cell-cell adhesion	GO	5 out of 7	34.7802	downregulated	2	0.23503	0.7905	upregulated	3	0.776751	0.4599	downregulated	10	5.66443	0.0035	downregulated	5	7.48314	0.0006	upregulated	29	17.6085	2.3e-08	upregulated	4	4.56579	0.0104
integrin complex	GO	5 out of 7	34.6367	downregulated	2	2.50081	0.082					downregulated	5	8.04886	0.0003	downregulated	5	9.41128	8.2e-05	upregulated	10	10.0796	4.2e-05	upregulated	2	4.59613	0.0101
regeneration	GO	6 out of 7	34.5745	downregulated	3	0.413523	0.6613	upregulated	4	3.72913	0.024	downregulated	16	6.15768	0.0021	downregulated	10	6.68734	0.0012	upregulated	30	17.2698	3.2e-08	upregulated	7	4.67861	0.0093	upregulated	2	3.09665	0.0452
intrinsic component of endoplasmic reticulum membrane	GO	4 out of 7	34.2445	upregulated	3	5.02192	0.0066	upregulated	7	1.10376	0.3316	downregulated	15	13.3354	1.6e-06	downregulated	15	17.0892	3.8e-08	upregulated	19	8.51792	0.0002	upregulated	9	1.42771	0.2399
positive regulation of reactive oxygen species biosynthetic process	GO	5 out of 7	33.546	downregulated	1	2.45967	0.0855	upregulated	1	2.82142	0.0595	downregulated	6	8.68797	0.0002	downregulated	6	8.87128	0.0001	upregulated	13	12.4092	4.1e-06	upregulated	4	3.93933	0.0195
protein activation cascade	GO	6 out of 7	32.9217	downregulated	3	1.66018	0.1901	downregulated	1	0.470476	0.6247	downregulated	4	1.38377	0.2506	downregulated	3	5.61763	0.0036	upregulated	23	22.9238	1.1e-10	upregulated	3	0.865797	0.4207
cell leading edge	GO	6 out of 7	32.8111	downregulated	13	3.7926	0.0225	downregulated	10	1.72074	0.1789	downregulated	43	8.58684	0.0002	downregulated	28	9.65505	6.4e-05	upregulated	85	47.909	1.6e-21	downregulated	71	40.2462	3.3e-18	upregulated	1	1.393	0.2483
myeloid cell development	GO	5 out of 7	32.5927	downregulated	1	2.21519	0.1091					downregulated	8	5.95433	0.0026	downregulated	7	10.5515	2.6e-05	upregulated	14	12.1752	5.2e-06	upregulated	3	1.69643	0.1833
regulation of extracellular matrix organization	GO	5 out of 7	32.4963	downregulated	3	3.09171	0.0454	upregulated	1	0.366894	0.6929	downregulated	6	5.80644	0.003	downregulated	2	0.750321	0.4722	upregulated	12	15.4495	2e-07	upregulated	5	7.76523	0.0004
positive regulation of reactive oxygen species metabolic process	GO	5 out of 7	32.3483	downregulated	1	1.87482	0.1534	upregulated	2	2.18973	0.1119	downregulated	9	7.3688	0.0006	downregulated	8	6.91797	0.001	upregulated	22	16.2541	8.7e-08	upregulated	4	2.12234	0.1198
protein complex involved in cell adhesion	GO	5 out of 7	32.3407	downregulated	2	2.35195	0.0952					downregulated	5	7.36458	0.0006	downregulated	5	8.94006	0.0001	upregulated	10	9.25568	9.6e-05	upregulated	2	4.42848	0.0119
cell adhesion mediator activity	GO	5 out of 7	32.0174	downregulated	3	1.92063	0.1465	upregulated	1	0.615243	0.5405	downregulated	7	7.48731	0.0006	downregulated	3	4.38977	0.0124	upregulated	15	12.7182	3e-06	upregulated	4	6.11668	0.0022
cell-cell adhesion	GO	4 out of 7	31.7327	upregulated	17	6.62145	0.0013	upregulated	13	4.48835	0.0112	downregulated	37	19.3749	3.9e-09	downregulated	19	10.4808	2.8e-05	upregulated	75	28.5905	3.8e-13	downregulated	54	17.0798	3.8e-08	upregulated	1	1.47613	0.2285
positive regulation of nitric oxide metabolic process	GO	5 out of 7	31.4204	downregulated	1	2.67212	0.0691	upregulated	1	3.0119	0.0492	downregulated	6	9.08244	0.0001	downregulated	6	9.82914	5.4e-05	upregulated	10	9.97013	4.7e-05	upregulated	3	2.87851	0.0562
respiratory tube development	GO	5 out of 7	31.1533	downregulated	4	3.00344	0.0496	upregulated	8	3.5519	0.0287	downregulated	16	6.41395	0.0016	downregulated	10	4.78099	0.0084	upregulated	34	21.5457	4.4e-10	downregulated	10	2.03493	0.1307	upregulated	1	0.996058	0.3693
positive regulation of substrate adhesion-dependent cell spreading	GO	4 out of 7	31.0919	downregulated	4	6.56113	0.0014	downregulated	1	3.847	0.0213	downregulated	10	15.5946	1.7e-07	downregulated	4	5.62161	0.0036	upregulated	10	5.07156	0.0063	downregulated	2	0.532448	0.5872
reactive oxygen species metabolic process	GO	5 out of 7	30.8154	upregulated	1	1.02499	0.3588	upregulated	2	1.81285	0.1632	downregulated	11	6.64247	0.0013	downregulated	10	9.95007	4.8e-05	upregulated	16	11.1644	1.4e-05	upregulated	3	1.46744	0.2305	upregulated	1	4.4289	0.0119
lung development	GO	5 out of 7	30.6328	downregulated	4	3.05018	0.0474	upregulated	8	3.69894	0.0247	downregulated	16	6.67227	0.0013	downregulated	10	4.93011	0.0072	upregulated	33	20.7416	9.8e-10	downregulated	10	2.07919	0.125	upregulated	1	1.01684	0.3617
basolateral plasma membrane	GO	6 out of 7	30.3414	downregulated	6	1.65826	0.1905	upregulated	7	4.27103	0.014	downregulated	14	4.446	0.0117	downregulated	9	5.55269	0.0039	upregulated	31	12.8543	2.6e-06	upregulated	8	8.90199	0.0001	upregulated	1	1.19921	0.3014
positive regulation of sprouting angiogenesis	GO	5 out of 7	30.3275	downregulated	2	4.15321	0.0157					downregulated	4	3.62743	0.0266	downregulated	1	3.0871	0.0456	upregulated	9	9.51283	7.4e-05	upregulated	2	9.94694	4.8e-05
negative regulation of hemopoiesis	GO	5 out of 7	30.1514	downregulated	4	0.794147	0.452	upregulated	4	6.25185	0.0019	downregulated	11	3.44644	0.0319	downregulated	7	3.24601	0.0389	upregulated	35	24.5536	2.2e-11	upregulated	8	4.36302	0.0127
regulation of sprouting angiogenesis	GO	5 out of 7	29.9896	downregulated	5	6.65067	0.0013	upregulated	1	0.0908984	0.9131	downregulated	6	3.59397	0.0275	downregulated	3	2.4924	0.0827	upregulated	12	8.51517	0.0002	upregulated	2	8.82827	0.0001
stress response to copper ion	GO	3 out of 7	29.9207													downregulated	1	2.51399	0.0809	upregulated	7	17.0827	3.8e-08	upregulated	5	10.324	3.3e-05
regulation of small GTPase mediated signal transduction	GO	5 out of 7	29.8194	upregulated	23	5.74718	0.0032	downregulated	9	4.33137	0.0131	downregulated	41	9.98093	4.6e-05	downregulated	24	7.73186	0.0004	upregulated	55	23.0639	9.6e-11	downregulated	37	11.0089	1.7e-05	upregulated	1	1.46744	0.2305
regulation of cysteine-type endopeptidase activity	GO	5 out of 7	29.7671	downregulated	8	2.25809	0.1045	upregulated	5	3.62011	0.0268	downregulated	22	8.98134	0.0001	downregulated	15	6.2255	0.002	upregulated	31	11.6582	8.6e-06	upregulated	10	4.26401	0.0141
cell-cell adhesion mediator activity	GO	5 out of 7	29.5719	downregulated	2	1.19807	0.3018	upregulated	1	0.739471	0.4774	downregulated	6	6.18877	0.0021	downregulated	2	3.52306	0.0295	upregulated	12	12.7848	2.8e-06	upregulated	4	6.61667	0.0013
neutrophil migration	GO	5 out of 7	29.0625	downregulated	3	1.55942	0.2103	upregulated	1	0.743002	0.4757	downregulated	13	10.3991	3e-05	downregulated	7	9.08041	0.0001	upregulated	12	6.32303	0.0018	upregulated	4	2.44352	0.0869
regulation of stem cell differentiation	GO	7 out of 7	29.0217	downregulated	5	2.34466	0.0959	downregulated	3	2.04949	0.1288	downregulated	8	1.83174	0.1601	downregulated	2	0.245497	0.7823	upregulated	19	16.7231	5.5e-08	upregulated	7	4.28591	0.0138	upregulated	1	1.54131	0.2141
defense response to bacterium	GO	5 out of 7	29.0141	downregulated	7	2.35511	0.0949	upregulated	6	5.76537	0.0031	downregulated	17	10.7125	2.2e-05	downregulated	14	15.5562	1.8e-07	upregulated	26	5.48212	0.0042	upregulated	6	0.673491	0.5099
exocrine system development	GO	7 out of 7	28.3996	downregulated	3	3.45039	0.0317	downregulated	2	3.56027	0.0284	downregulated	5	4.04673	0.0175	downregulated	3	0.962668	0.3819	upregulated	12	12.3597	4.3e-06	upregulated	1	0.521731	0.5935	upregulated	1	3.49811	0.0303
positive regulation of lipid localization	GO	4 out of 7	28.1389	upregulated	3	2.32464	0.0978	upregulated	5	1.8691	0.1543	downregulated	6	5.43191	0.0044	downregulated	6	6.32753	0.0018	upregulated	12	13.1824	1.9e-06	upregulated	6	7.39084	0.0006
cell fate commitment	GO	6 out of 7	27.825	downregulated	8	1.44355	0.2361	downregulated	3	2.70872	0.0666	downregulated	24	8.93622	0.0001	downregulated	7	1.4006	0.2465	upregulated	30	11.3364	1.2e-05	upregulated	4	1.99954	0.1354
response to virus	GO	5 out of 7	27.3174	downregulated	10	2.62775	0.0722	upregulated	17	13.4752	1.4e-06	downregulated	18	2.54911	0.0782	downregulated	14	6.76244	0.0012	upregulated	52	28.0233	6.8e-13	upregulated	8	0.829947	0.4361
regulation of myeloid cell differentiation	GO	3 out of 7	27.2309	upregulated	5	1.32814	0.265	upregulated	5	3.36151	0.0347	downregulated	19	2.97995	0.0508	downregulated	17	11.1939	1.4e-05	upregulated	44	19.8266	2.5e-09	downregulated	13	2.07995	0.1249
S100 protein binding	GO	5 out of 7	27.1517	downregulated	1	1.56579	0.2089	downregulated	1	1.31611	0.2682	upregulated	1	0.97011	0.379	downregulated	2	3.7361	0.0238	upregulated	8	18.7219	7.4e-09	upregulated	1	2.78193	0.0619
regulation of substrate adhesion-dependent cell spreading	GO	4 out of 7	26.6367	downregulated	5	7.27091	0.0007	downregulated	1	3.46815	0.0312	downregulated	13	16.3212	8.2e-08	downregulated	6	5.90183	0.0027	downregulated	11	5.68746	0.0034	downregulated	3	0.637936	0.5284
transcription factor activity, RNA polymerase II proximal promoter sequence-specific DNA binding	GO	5 out of 7	26.5623	upregulated	16	2.35765	0.0946	downregulated	7	0.887748	0.4116	downregulated	32	1.51457	0.2199	downregulated	21	2.23593	0.1069	upregulated	68	24.2995	2.8e-11	downregulated	21	2.48561	0.0833	upregulated	2	2.46788	0.0848
membrane invagination	GO	5 out of 7	26.539	downregulated	5	4.58101	0.0102	downregulated	1	3.31728	0.0363	downregulated	10	5.34294	0.0048	downregulated	9	9.81946	5.4e-05	upregulated	12	5.91079	0.0027	downregulated	3	2.43251	0.0878
organ growth	GO	4 out of 7	25.9725	downregulated	7	3.89353	0.0204	upregulated	1	0.224474	0.7989	upregulated	8	4.22149	0.0147	upregulated	3	5.48406	0.0042	upregulated	26	24.3633	2.6e-11	upregulated	8	5.98751	0.0025	upregulated	1	1.65814	0.1905
epidermis development	GO	7 out of 7	25.8781	downregulated	6	0.752719	0.4711	downregulated	5	2.07077	0.1261	downregulated	20	5.09275	0.0061	downregulated	8	1.93388	0.1446	upregulated	31	10.6373	2.4e-05	upregulated	15	4.66527	0.0094	upregulated	1	0.725408	0.4841
SMAD binding	GO	5 out of 7	25.625	downregulated	4	4.24347	0.0144	upregulated	2	0.738441	0.4779	upregulated	4	1.2882	0.2758	downregulated	3	0.919415	0.3988	upregulated	21	20.0384	2e-09	upregulated	1	0.744845	0.4748	upregulated	1	1.70549	0.1817
T cell selection	GO	5 out of 7	25.5374	downregulated	2	1.34157	0.2614					downregulated	5	5.18084	0.0056	downregulated	3	8.4958	0.0002	upregulated	8	8.3077	0.0002	upregulated	1	2.21149	0.1095
cargo receptor activity	GO	5 out of 7	25.4978	downregulated	4	3.67169	0.0254	downregulated	3	2.6106	0.0735	downregulated	9	6.03743	0.0024	downregulated	4	3.32758	0.0359	upregulated	16	11.691	8.4e-06	downregulated	7	1.84047	0.1587
negative regulation of cysteine-type endopeptidase activity	GO	5 out of 7	25.4823	downregulated	3	2.38331	0.0922	upregulated	2	0.266325	0.7662	downregulated	8	2.71809	0.066	downregulated	8	6.91797	0.001	upregulated	12	8.52959	0.0002	upregulated	6	5.19965	0.0055
defense response to virus	GO	5 out of 7	25.2635	downregulated	6	1.78871	0.1672	upregulated	14	12.1602	5.2e-06	downregulated	14	4.09093	0.0167	downregulated	10	6.20098	0.002	upregulated	41	25.1743	1.2e-11	upregulated	5	0.168829	0.8447
bone growth	GO	4 out of 7	25.1617	downregulated	3	2.37576	0.0929					downregulated	3	2.5087	0.0814	upregulated	1	1.99905	0.1355	upregulated	12	16.4815	7e-08	upregulated	3	5.79472	0.003
negative regulation of apoptotic signaling pathway	GO	5 out of 7	25.1047	upregulated	12	0.977224	0.3764	upregulated	11	7.74175	0.0004	downregulated	12	4.07319	0.017	downregulated	14	8.4324	0.0002	upregulated	37	16.1503	9.7e-08	upregulated	7	4.30594	0.0135	upregulated	1	0.861837	0.4224
embryonic organ development	GO	7 out of 7	24.8985	downregulated	14	2.90766	0.0546	downregulated	6	2.3517	0.0952	downregulated	27	3.36347	0.0346	downregulated	16	1.3741	0.2531	upregulated	54	11.8874	6.9e-06	upregulated	14	2.57237	0.0764	upregulated	1	0.4418	0.6429
transcriptional repressor activity, RNA polymerase II proximal promoter sequence-specific DNA binding	GO	7 out of 7	24.7373	downregulated	4	0.521564	0.5936	downregulated	6	3.73324	0.0239	downregulated	13	1.93184	0.1449	downregulated	11	2.89666	0.0552	upregulated	28	12.2246	4.9e-06	upregulated	5	2.25442	0.1049	upregulated	1	1.17498	0.3088
regulation of lamellipodium morphogenesis	GO	5 out of 7	24.7309	downregulated	2	2.87471	0.0564					downregulated	3	3.04182	0.0477	downregulated	2	4.5381	0.0107	upregulated	4	6.91955	0.001	upregulated	1	7.35671	0.0006
regulation of reactive oxygen species biosynthetic process	GO	5 out of 7	24.7128	downregulated	3	2.02342	0.1322	upregulated	4	8.62061	0.0002	downregulated	8	7.71852	0.0004	downregulated	7	6.61569	0.0013	upregulated	18	13.1762	1.9e-06	upregulated	5	3.79955	0.0224
RNA polymerase II proximal promoter sequence-specific DNA binding	GO	4 out of 7	24.6862	downregulated	18	2.38096	0.0925	downregulated	5	0.463851	0.6289	downregulated	37	1.20696	0.2991	upregulated	4	1.12337	0.3252	upregulated	76	26.2329	4e-12	downregulated	16	2.38644	0.092	upregulated	1	0.292296	0.7465
gland morphogenesis	GO	5 out of 7	24.6754	downregulated	5	1.61836	0.1982	downregulated	2	2.79864	0.0609	downregulated	7	1.1743	0.309	upregulated	1	0.937021	0.3918	upregulated	25	18.9068	6.1e-09	upregulated	3	1.11426	0.3282
negative regulation of mitotic cell cycle phase transition	GO	3 out of 7	24.6356	upregulated	7	1.3569	0.2575	upregulated	6	1.2668	0.2817	downregulated	23	12.7767	2.8e-06	downregulated	17	9.16475	0.0001	upregulated	27	5.31778	0.0049	downregulated	2	0.150578	0.8602
regulation of Wnt signaling pathway	GO	5 out of 7	24.243	downregulated	8	1.01092	0.3639	upregulated	7	0.850841	0.4271	downregulated	26	4.98636	0.0068	downregulated	12	1.52478	0.2177	upregulated	46	16.4116	7.5e-08	downregulated	23	3.05817	0.047	upregulated	3	4.21829	0.0147
defense response to Gram-positive bacterium	GO	4 out of 7	23.9137	downregulated	1	0.330568	0.7185	upregulated	1	2.56722	0.0767	downregulated	9	9.98003	4.6e-05	downregulated	8	13.955	8.7e-07	upregulated	9	2.66822	0.0694	downregulated	2	0.452865	0.6358
positive T cell selection	GO	5 out of 7	23.8597	downregulated	2	1.87495	0.1534					downregulated	4	4.91185	0.0074	downregulated	2	4.83178	0.008	upregulated	6	9.64294	6.5e-05	upregulated	1	2.59813	0.0744
regulation of reactive oxygen species metabolic process	GO	4 out of 7	23.8284	downregulated	6	1.51552	0.2197	upregulated	8	6.2814	0.0019	downregulated	15	6.12621	0.0022	downregulated	13	7.101	0.0008	upregulated	33	17.521	2.5e-08	downregulated	13	2.15391	0.116
regulation of gliogenesis	GO	4 out of 7	23.697	downregulated	2	1.58668	0.2046	upregulated	6	6.20511	0.002	downregulated	18	18.8089	6.8e-09	downregulated	10	6.02152	0.0024	upregulated	13	6.88149	0.001	downregulated	10	3.39645	0.0335
lipid transport	GO	5 out of 7	23.6774	downregulated	7	1.79079	0.1668	upregulated	13	2.4211	0.0888	downregulated	21	6.66698	0.0013	downregulated	15	9.71997	6e-05	upregulated	31	10.3906	3.1e-05	upregulated	16	6.75713	0.0012	upregulated	1	1.16367	0.3123
apical plasma membrane	GO	6 out of 7	23.6653	downregulated	10	3.03434	0.0481	downregulated	6	0.969583	0.3792	downregulated	24	10.8053	2e-05	downregulated	11	4.39175	0.0124	upregulated	43	12.2624	4.7e-06	downregulated	33	10.743	2.2e-05	upregulated	2	2.94495	0.0526
negative regulation of intrinsic apoptotic signaling pathway in response to DNA damage	GO	4 out of 7	23.6648	upregulated	2	0.754149	0.4704	upregulated	3	3.30019	0.0369	downregulated	1	2.26298	0.104	downregulated	4	8.821	0.0001	upregulated	6	10.3078	3.3e-05	upregulated	2	6.32738	0.0018
embryo implantation	GO	6 out of 7	23.6369	downregulated	3	8.56552	0.0002	downregulated	2	2.93624	0.0531	downregulated	2	2.68704	0.0681	downregulated	1	1.8957	0.1502	upregulated	7	4.82648	0.008	upregulated	2	1.96156	0.1406	upregulated	1	5.59083	0.0037
positive regulation of CD4-positive, alpha-beta T cell activation	GO	5 out of 7	23.5827	downregulated	1	0.76584	0.4649					downregulated	5	4.87139	0.0077	downregulated	2	3.36333	0.0346	upregulated	10	8.82393	0.0001	upregulated	1	5.7582	0.0032
extracellular matrix binding	GO	4 out of 7	23.5768	downregulated	1	2.83852	0.0585	upregulated	1	3.17471	0.0418	downregulated	5	7.30855	0.0007	downregulated	5	6.12535	0.0022	upregulated	13	12.2249	4.9e-06	downregulated	2	1.74588	0.1745
drug transport	GO	4 out of 7	23.4849	upregulated	5	1.42166	0.2413	downregulated	4	2.53977	0.0789	downregulated	7	9.60236	6.8e-05	downregulated	3	1.13898	0.3201	upregulated	19	7.33261	0.0007	upregulated	6	6.8326	0.0011
regulation of CD4-positive, alpha-beta T cell activation	GO	5 out of 7	23.4619	downregulated	1	0.374049	0.6879					downregulated	5	2.60829	0.0737	downregulated	2	2.27493	0.1028	upregulated	15	12.9659	2.3e-06	upregulated	2	5.23882	0.0053
negative regulation of response to wounding	GO	5 out of 7	23.4265	downregulated	3	1.83304	0.1599	upregulated	5	2.17051	0.1141	downregulated	7	3.80779	0.0222	downregulated	5	2.99441	0.0501	upregulated	14	8.68509	0.0002	upregulated	4	8.27672	0.0003
regulation of cell junction assembly	GO	5 out of 7	23.3417	downregulated	2	2.4352	0.0876	upregulated	4	1.57022	0.208	downregulated	13	8.44395	0.0002	downregulated	8	4.14315	0.0159	upregulated	16	7.73271	0.0004	upregulated	4	2.15692	0.1157
regulation of pri-miRNA transcription by RNA polymerase II	GO	6 out of 7	23.0602	downregulated	3	2.50873	0.0814	downregulated	1	1.60629	0.2006	downregulated	4	1.4139	0.2432	downregulated	2	1.73907	0.1757	upregulated	11	14.2302	6.6e-07	upregulated	1	1.56204	0.2097
female pregnancy	GO	6 out of 7	23.0474	downregulated	8	4.34874	0.0129	downregulated	3	0.92877	0.395	downregulated	12	5.67511	0.0034	downregulated	8	4.68345	0.0092	upregulated	25	6.55573	0.0014	upregulated	9	3.30376	0.0367	upregulated	2	4.10754	0.0164
steroid metabolic process	GO	3 out of 7	22.9218	upregulated	5	0.129132	0.8789	upregulated	10	3.94359	0.0194	downregulated	19	9.47326	7.7e-05	downregulated	22	16.7107	5.5e-08	downregulated	34	1.95094	0.1421	downregulated	11	1.12353	0.3251	upregulated	1	3.88499	0.0205
regulation of epithelial cell proliferation	GO	5 out of 7	22.7809	downregulated	11	2.91546	0.0542	upregulated	17	4.59905	0.0101	upregulated	15	4.35773	0.0128	downregulated	15	3.50266	0.0301	upregulated	42	16.7348	5.4e-08	upregulated	15	7.01548	0.0009	upregulated	2	1.56919	0.2082
positive regulation of STAT cascade	GO	5 out of 7	22.6891	downregulated	3	2.60165	0.0742	downregulated	1	2.68551	0.0682	upregulated	1	0.660543	0.5166	downregulated	3	0.755997	0.4695	upregulated	16	13.6832	1.1e-06	downregulated	3	1.42836	0.2397	upregulated	1	5.05169	0.0064
gland development	GO	4 out of 7	22.6148	downregulated	14	4.56983	0.0104	upregulated	8	2.74059	0.0645	downregulated	32	3.8256	0.0218	upregulated	8	4.00663	0.0182	upregulated	58	16.8011	5.1e-08	downregulated	26	4.36585	0.0127	upregulated	5	8.53136	0.0002
epidermal cell differentiation	GO	7 out of 7	22.6059	downregulated	5	1.71868	0.1793	downregulated	5	2.52194	0.0803	downregulated	12	3.73463	0.0239	downregulated	2	1.71735	0.1795	upregulated	16	6.65293	0.0013	upregulated	12	5.17297	0.0057	upregulated	1	1.08741	0.3371
carbohydrate binding	GO	5 out of 7	22.5843	downregulated	6	1.54606	0.2131	upregulated	10	2.04918	0.1288	downregulated	17	5.92209	0.0027	downregulated	11	4.4052	0.0122	upregulated	33	8.21957	0.0003	upregulated	10	4.54058	0.0107
regulation of intrinsic apoptotic signaling pathway in response to DNA damage	GO	4 out of 7	22.5351	upregulated	3	1.03599	0.3549	upregulated	3	3.13548	0.0435	downregulated	2	2.06571	0.1267	downregulated	6	9.07475	0.0001	upregulated	7	9.46177	7.8e-05	upregulated	2	6.10435	0.0022
regulation of JNK cascade	GO	5 out of 7	22.5269	downregulated	7	5.77069	0.0031	upregulated	6	2.48945	0.083	downregulated	16	7.73433	0.0004	downregulated	11	5.68186	0.0034	upregulated	27	9.735	5.9e-05	downregulated	19	5.08578	0.0062	upregulated	1	1.18021	0.3072
RNA polymerase II transcription factor binding	GO	5 out of 7	22.4847	downregulated	4	1.98473	0.1374	upregulated	4	1.51768	0.2192	downregulated	11	2.32326	0.098	downregulated	8	2.36652	0.0938	upregulated	26	14.8342	3.6e-07	upregulated	9	2.49368	0.0826
cellular response to vascular endothelial growth factor stimulus	GO	6 out of 7	22.4841	downregulated	4	6.18911	0.0021	downregulated	2	1.44401	0.236	downregulated	4	2.59518	0.0746	downregulated	1	0.945159	0.3886	upregulated	7	4.72416	0.0089	upregulated	3	6.58651	0.0014
thymic T cell selection	GO	4 out of 7	22.3893	upregulated	1	0.826196	0.4377					downregulated	2	6.13218	0.0022	downregulated	2	5.69263	0.0034	upregulated	5	8.48906	0.0002	upregulated	1	2.9016	0.0549
sterol transport	GO	4 out of 7	22.2468	upregulated	3	0.808329	0.4456	upregulated	4	1.9914	0.1365	downregulated	8	3.82093	0.0219	downregulated	7	10.4287	3e-05	upregulated	9	7.73072	0.0004	upregulated	4	3.06624	0.0466
B cell activation	GO	4 out of 7	22.1627	upregulated	4	1.75978	0.1721	downregulated	1	0.113539	0.8927	downregulated	16	9.88743	5.1e-05	downregulated	13	8.51459	0.0002	upregulated	21	7.90604	0.0004	downregulated	7	2.49912	0.0822
mesodermal cell differentiation	GO	5 out of 7	21.9666	downregulated	1	1.82775	0.1608					downregulated	4	7.30462	0.0007	downregulated	2	3.57203	0.0281	upregulated	5	5.27648	0.0051	upregulated	3	3.9857	0.0186
skin epidermis development	GO	5 out of 7	21.8055	upregulated	3	1.48298	0.227	downregulated	2	3.27009	0.038	downregulated	10	6.41319	0.0016	downregulated	6	3.47972	0.0308	upregulated	11	7.77694	0.0004	upregulated	3	2.34857	0.0955
regulation of mitotic cell cycle phase transition	GO	4 out of 7	21.682	upregulated	21	1.72224	0.1787	upregulated	20	5.95205	0.0026	downregulated	40	13.4416	1.5e-06	downregulated	25	6.95965	0.0009	upregulated	48	5.54551	0.0039	upregulated	9	3.40954	0.0331
regulation of vasoconstriction	GO	4 out of 7	21.6562	downregulated	1	3.55729	0.0285	upregulated	3	2.12287	0.1197	upregulated	4	3.78684	0.0227	downregulated	6	6.26056	0.0019	upregulated	9	5.90182	0.0027	upregulated	5	8.05945	0.0003
negative regulation of leukocyte apoptotic process	GO	4 out of 7	21.59	upregulated	1	1.24366	0.2883					downregulated	5	3.79144	0.0226	downregulated	4	4.11023	0.0164	upregulated	11	11.4733	1e-05	upregulated	2	3.45865	0.0315
development of primary male sexual characteristics	GO	6 out of 7	21.5786	downregulated	3	1.50323	0.2224	upregulated	6	6.69028	0.0012	downregulated	10	5.58557	0.0038	downregulated	9	3.11533	0.0444	upregulated	25	14.4742	5.2e-07	upregulated	3	0.528053	0.5898	upregulated	1	3.06249	0.0468
limb morphogenesis	GO	5 out of 7	21.5521	downregulated	6	1.26606	0.2819	downregulated	2	2.08877	0.1238	downregulated	8	2.57014	0.0765	upregulated	3	1.89411	0.1505	upregulated	27	13.4439	1.5e-06	upregulated	5	4.07737	0.017
structural constituent of muscle	GO	5 out of 7	21.5296					downregulated	1	1.01859	0.3611	downregulated	3	5.16714	0.0057	downregulated	3	3.83603	0.0216	upregulated	10	8.70324	0.0002	upregulated	2	2.80455	0.0605
leukocyte chemotaxis	GO	4 out of 7	21.4564	upregulated	1	1.13295	0.3221	upregulated	5	4.1928	0.0151	downregulated	11	7.36539	0.0006	downregulated	7	6.44477	0.0016	upregulated	18	8.60894	0.0002	upregulated	7	4.36302	0.0127
response to steroid hormone	GO	4 out of 7	21.4321	downregulated	11	3.46124	0.0314	upregulated	9	4.06177	0.0172	upregulated	12	2.84808	0.058	upregulated	6	5.15848	0.0058	upregulated	51	21.1968	6.2e-10	upregulated	17	8.29327	0.0003	upregulated	1	0.549056	0.5775
negative regulation of intrinsic apoptotic signaling pathway	GO	4 out of 7	21.426	upregulated	7	1.72769	0.1777	upregulated	3	2.26859	0.1035	downregulated	3	2.01004	0.134	downregulated	6	5.55255	0.0039	upregulated	16	12.7099	3e-06	upregulated	2	5.14973	0.0058
regulation of hematopoietic progenitor cell differentiation	GO	7 out of 7	21.3693	downregulated	3	2.08203	0.1247	downregulated	1	4.42058	0.012	downregulated	5	3.32028	0.0361	downregulated	1	0.233857	0.7915	upregulated	9	4.79409	0.0083	upregulated	5	4.41929	0.012	upregulated	1	2.0992	0.1226
negative regulation of extracellular matrix organization	GO	4 out of 7	21.3032	downregulated	3	6.64478	0.0013					upregulated	1	2.56156	0.0772	downregulated	1	1.25661	0.2846	upregulated	5	8.28854	0.0003	upregulated	2	7.67484	0.0005
positive regulation of NIK/NF-kappaB signaling	GO	4 out of 7	21.2925	upregulated	4	2.14307	0.1173	upregulated	3	5.57742	0.0038	downregulated	8	4.25528	0.0142	downregulated	8	7.44915	0.0006	upregulated	18	15.3591	2.1e-07	upregulated	2	1.94952	0.1423
ammonium transmembrane transport	GO	6 out of 7	21.0309	downregulated	2	3.5459	0.0288	downregulated	1	1.84661	0.1578	downregulated	2	4.18521	0.0152	downregulated	3	5.78599	0.0031	upregulated	8	5.32454	0.0049	upregulated	1	0.342612	0.7099
ficolin-1-rich granule membrane	GO	4 out of 7	21.0114	downregulated	1	0.451306	0.6368	upregulated	5	3.47996	0.0308	downregulated	5	6.32526	0.0018	downregulated	7	14.4428	5.3e-07	upregulated	12	6.23257	0.002	downregulated	7	2.96049	0.0518
azurophil granule lumen	GO	4 out of 7	20.9443	upregulated	1	0.234034	0.7913	upregulated	6	2.72787	0.0654	downregulated	13	7.56765	0.0005	downregulated	9	8.97239	0.0001	upregulated	9	4.75088	0.0086	upregulated	2	2.61529	0.0731
gastrulation	GO	5 out of 7	20.8798	downregulated	4	3.02487	0.0486	upregulated	1	0.0729285	0.9297	downregulated	10	5.24873	0.0053	downregulated	6	5.19815	0.0055	upregulated	22	8.32088	0.0002	upregulated	7	5.19288	0.0056	upregulated	1	2.28813	0.1015
NADPH oxidase complex	GO	3 out of 7	20.8517									downregulated	4	8.70885	0.0002	downregulated	3	9.39875	8.3e-05	upregulated	3	2.7441	0.0643
apical part of cell	GO	6 out of 7	20.8031	downregulated	11	2.79678	0.061	downregulated	7	1.76223	0.1717	downregulated	28	9.88595	5.1e-05	downregulated	16	5.39433	0.0045	upregulated	51	13.0536	2.1e-06	downregulated	42	14.6612	4.3e-07	upregulated	2	2.5714	0.0764
cellular response to starvation	GO	5 out of 7	20.7622	downregulated	3	4.29671	0.0136	upregulated	4	1.64591	0.1928	downregulated	13	4.57506	0.0103	downregulated	10	6.46741	0.0016	upregulated	17	3.17431	0.0418	downregulated	11	2.43099	0.0879	upregulated	1	3.89466	0.0204
positive regulation of neutrophil migration	GO	4 out of 7	20.7503					upregulated	1	0.976983	0.3764	downregulated	5	6.26562	0.0019	downregulated	3	6.22514	0.002	upregulated	5	6.54159	0.0014	upregulated	2	2.69493	0.0675
collagen-activated signaling pathway	GO	4 out of 7	20.7273									downregulated	3	5.74429	0.0032	downregulated	2	6.45423	0.0016	upregulated	4	5.64904	0.0035	upregulated	1	2.87976	0.0561
tissue regeneration	GO	6 out of 7	20.7018	downregulated	1	0.390984	0.6764	upregulated	1	0.329439	0.7193	downregulated	5	3.89697	0.0203	downregulated	2	3.6714	0.0254	upregulated	8	4.75855	0.0086	upregulated	5	6.06781	0.0023	upregulated	1	2.24556	0.1059
regulation of cell division	GO	6 out of 7	20.6105	downregulated	2	1.86149	0.1554	downregulated	3	5.95711	0.0026	downregulated	17	6.10254	0.0022	downregulated	7	3.23803	0.0392	upregulated	20	5.10449	0.0061	downregulated	14	2.97596	0.051	upregulated	1	1.32279	0.2664
positive regulation of vascular associated smooth muscle cell migration	GO	4 out of 7	20.6045	downregulated	1	4.8997	0.0074					downregulated	1	4.14596	0.0158	downregulated	2	6.64664	0.0013	upregulated	6	8.98073	0.0001	downregulated	2	4.06854	0.0171
cellular response to toxic substance	GO	5 out of 7	20.6005	downregulated	8	5.19253	0.0056	upregulated	13	6.62204	0.0013	downregulated	19	7.17982	0.0008	downregulated	12	6.07794	0.0023	upregulated	23	4.84018	0.0079	upregulated	5	3.93209	0.0196
negative regulation of tumor necrosis factor superfamily cytokine production	GO	5 out of 7	20.5038	downregulated	1	1.28705	0.2761	upregulated	1	2.68145	0.0685	downregulated	5	5.64542	0.0035	downregulated	4	6.13373	0.0022	upregulated	11	7.38996	0.0006	upregulated	2	2.72911	0.0653
regulation of intrinsic apoptotic signaling pathway	GO	4 out of 7	20.3604	upregulated	10	1.09282	0.3353	upregulated	5	3.0187	0.0489	downregulated	12	5.94629	0.0026	downregulated	9	5.11221	0.006	upregulated	20	8.76249	0.0002	upregulated	3	4.6509	0.0096
epidermis morphogenesis	GO	5 out of 7	20.3128	downregulated	2	1.8526	0.1568	downregulated	1	4.25386	0.0142	downregulated	5	5.51503	0.004	downregulated	1	3.40324	0.0333	upregulated	4	5.28804	0.0051
positive regulation of muscle tissue development	GO	6 out of 7	20.2816	upregulated	5	3.67547	0.0253	downregulated	1	0.742934	0.4757	downregulated	6	5.4043	0.0045	downregulated	2	0.98662	0.3728	upregulated	11	8.17101	0.0003	upregulated	2	4.48231	0.0113	upregulated	2	4.16987	0.0155
stem cell division	GO	5 out of 7	20.264	upregulated	2	0.701532	0.4958	downregulated	2	4.3545	0.0128	downregulated	3	4.63723	0.0097	downregulated	3	3.33829	0.0355	upregulated	7	7.68949	0.0005	upregulated	1	0.946017	0.3883
hair cycle process	GO	5 out of 7	20.2336	upregulated	3	1.4574	0.2328	downregulated	2	3.23492	0.0394	downregulated	9	5.09036	0.0062	downregulated	6	3.31526	0.0363	upregulated	12	7.7148	0.0004	upregulated	3	2.33563	0.0967
sterol metabolic process	GO	4 out of 7	20.1819	upregulated	3	0.395539	0.6733	upregulated	7	3.60152	0.0273	downregulated	10	7.88972	0.0004	downregulated	13	14.0625	7.8e-07	upregulated	11	0.909581	0.4027	upregulated	6	1.31716	0.2679
contractile fiber	GO	4 out of 7	20.1014	downregulated	3	2.53081	0.0796	downregulated	5	2.04193	0.1298	downregulated	16	3.12825	0.0438	upregulated	3	2.75932	0.0633	upregulated	39	19.34	4e-09	downregulated	20	4.18028	0.0153
regulation of microglial cell activation	GO	3 out of 7	20.0972									downregulated	3	7.84287	0.0004	downregulated	3	10.8969	1.9e-05	upregulated	1	2.43399	0.0877	downregulated	1	1.07666	0.3407
response to mechanical stimulus	GO	3 out of 7	20.0845	upregulated	6	1.7546	0.173	upregulated	9	5.33268	0.0048	downregulated	17	6.74913	0.0012	downregulated	14	8.02827	0.0003	upregulated	39	22.7961	1.3e-10	downregulated	25	10.4017	3e-05
regulation of interleukin-8 secretion	GO	4 out of 7	20.0488					upregulated	1	2.34565	0.0958	downregulated	2	1.29294	0.2745	downregulated	3	7.68067	0.0005	upregulated	6	7.34448	0.0006	upregulated	2	6.07637	0.0023
glial cell fate commitment	GO	3 out of 7	20.0086									downregulated	4	7.6099	0.0005					upregulated	5	11.4251	1.1e-05	upregulated	1	0.973653	0.3777
stress response to metal ion	GO	3 out of 7	19.9404					upregulated	1	4.92988	0.0072	upregulated	1	2.81888	0.0597	downregulated	1	2.32051	0.0982	upregulated	8	15.677	1.6e-07	upregulated	5	9.69164	6.2e-05
response to peptide hormone	GO	5 out of 7	19.922	downregulated	9	3.39896	0.0334	upregulated	14	7.93469	0.0004	downregulated	22	2.82545	0.0593	downregulated	15	3.4861	0.0306	upregulated	66	27.4451	1.2e-12	downregulated	45	16.38	7.7e-08	upregulated	3	7.08103	0.0008
embryonic organ morphogenesis	GO	6 out of 7	19.8989	downregulated	11	3.80308	0.0223	downregulated	5	3.049	0.0474	downregulated	19	3.06654	0.0466	upregulated	1	0.583276	0.5581	upregulated	32	6.32422	0.0018	upregulated	8	3.54196	0.029	upregulated	1	0.697371	0.4979
mesoderm morphogenesis	GO	6 out of 7	19.8356	downregulated	3	2.14931	0.1166	upregulated	1	0.325663	0.722	downregulated	4	4.28155	0.0138	downregulated	2	2.46115	0.0853	upregulated	10	5.03876	0.0065	upregulated	5	3.08282	0.0458	upregulated	1	3.14768	0.043
embryonic appendage morphogenesis	GO	5 out of 7	19.741	downregulated	6	1.76344	0.1715	downregulated	2	2.22652	0.1079	downregulated	7	2.86805	0.0568	upregulated	2	1.1688	0.3107	upregulated	23	9.66404	6.4e-05	upregulated	5	4.38771	0.0124
response to toxic substance	GO	4 out of 7	19.6415	downregulated	12	2.83158	0.0589	upregulated	17	3.90723	0.0201	downregulated	33	8.27242	0.0003	downregulated	24	7.17831	0.0008	upregulated	59	16.0077	1.1e-07	downregulated	48	10.7413	2.2e-05
negative regulation of growth	GO	4 out of 7	19.5471	downregulated	9	2.17313	0.1138	downregulated	4	3.71128	0.0244	downregulated	26	9.01304	0.0001	upregulated	5	3.10272	0.0449	upregulated	37	12.8595	2.6e-06	downregulated	21	5.10708	0.0061
development of primary sexual characteristics	GO	5 out of 7	19.4125	downregulated	4	2.87808	0.0562	upregulated	7	5.40396	0.0045	downregulated	12	3.71867	0.0243	downregulated	12	2.92128	0.0539	upregulated	33	14.174	7e-07	downregulated	11	1.52539	0.2175	upregulated	1	2.64977	0.0707
regulation of bicellular tight junction assembly	GO	4 out of 7	19.4072					upregulated	1	0.629185	0.533	downregulated	3	3.76148	0.0232	downregulated	1	1.02602	0.3584	upregulated	8	10.5751	2.6e-05	upregulated	4	4.67384	0.0093
megakaryocyte development	GO	4 out of 7	19.2205									downregulated	4	7.07167	0.0008	downregulated	3	7.22622	0.0007	upregulated	4	4.17037	0.0154	upregulated	1	0.752206	0.4713
peptidyl-tyrosine autophosphorylation	GO	4 out of 7	19.1569	upregulated	1	0.225539	0.7981	upregulated	1	1.10736	0.3304	downregulated	5	6.02632	0.0024	downregulated	6	5.94319	0.0026	upregulated	8	6.45227	0.0016	upregulated	1	2.06803	0.1264
transcription factor activity, RNA polymerase II transcription factor binding	GO	6 out of 7	19.1384	downregulated	2	0.77087	0.4626	upregulated	2	2.6641	0.0697	downregulated	2	3.16368	0.0423	downregulated	5	3.57732	0.028	upregulated	11	10.9029	1.8e-05	upregulated	3	1.45005	0.2346	upregulated	1	1.93763	0.144
myosin complex	GO	6 out of 7	19.134	downregulated	2	3.0996	0.0451	downregulated	1	0.376892	0.686	downregulated	8	6.00055	0.0025	downregulated	4	4.03608	0.0177	upregulated	8	2.8129	0.06	upregulated	5	2.80794	0.0603
response to dsRNA	GO	5 out of 7	19.1038	downregulated	2	0.980748	0.375	upregulated	6	4.28668	0.0138	downregulated	11	4.18424	0.0152	downregulated	10	10.0124	4.5e-05	upregulated	15	5.54103	0.0039	upregulated	4	2.67211	0.0691
male sex differentiation	GO	6 out of 7	19.0982	downregulated	4	1.35368	0.2583	upregulated	7	6.23306	0.002	downregulated	10	5.11013	0.006	downregulated	9	2.39371	0.0913	upregulated	27	13.1883	1.9e-06	upregulated	4	0.390521	0.6767	upregulated	1	2.89486	0.0553
response to peptide	GO	5 out of 7	19.0433	downregulated	14	3.24285	0.0391	upregulated	17	11.9458	6.5e-06	downregulated	29	4.22406	0.0146	downregulated	23	6.23794	0.002	upregulated	78	33.1843	3.9e-15	downregulated	56	22.6676	1.4e-10	upregulated	3	6.76769	0.0012
cellular response to peptide	GO	5 out of 7	19.0348	downregulated	7	3.53761	0.0291	upregulated	12	6.92718	0.001	downregulated	20	4.12628	0.0161	downregulated	16	3.56048	0.0284	upregulated	60	30.7237	4.5e-14	downregulated	46	23.3454	7.3e-11	upregulated	2	7.35924	0.0006
cardiocyte differentiation	GO	5 out of 7	19.0014	upregulated	8	5.86288	0.0028	upregulated	3	0.472611	0.6234	downregulated	6	4.8809	0.0076	downregulated	3	2.79866	0.0609	upregulated	20	12.2377	4.8e-06	upregulated	6	3.95854	0.0191	upregulated	1	1.4611	0.232
mesoderm development	GO	6 out of 7	18.9999	downregulated	7	4.26138	0.0141	downregulated	2	0.56435	0.5687	downregulated	8	3.31334	0.0364	downregulated	5	4.15593	0.0157	upregulated	14	5.60854	0.0037	upregulated	5	2.48855	0.083	upregulated	2	4.21635	0.0148
regulation of NIK/NF-kappaB signaling	GO	4 out of 7	18.8635	upregulated	4	1.66439	0.1893	upregulated	5	4.83869	0.0079	downregulated	10	3.57049	0.0281	downregulated	9	6.234	0.002	upregulated	21	13.9723	8.5e-07	upregulated	2	1.58986	0.204
regulation of body fluid levels	GO	5 out of 7	18.7609	downregulated	9	1.37075	0.2539	upregulated	19	9.45493	7.8e-05	downregulated	33	3.4715	0.0311	downregulated	23	4.18702	0.0152	upregulated	75	24.303	2.8e-11	downregulated	38	8.2689	0.0003	upregulated	1	3.15246	0.0427
negative T cell selection	GO	3 out of 7	18.7402	upregulated	1	1.20047	0.3011					downregulated	2	7.06749	0.0009	downregulated	2	6.63436	0.0013	upregulated	4	6.23882	0.002
cardiac muscle cell development	GO	5 out of 7	18.6967	downregulated	3	2.61831	0.0729	upregulated	3	1.51759	0.2192	downregulated	4	4.37894	0.0125	downregulated	2	3.47202	0.0311	upregulated	9	7.34555	0.0006	upregulated	3	2.39946	0.0908
humoral immune response	GO	3 out of 7	18.6524	upregulated	1	1.64192	0.1936	upregulated	1	1.42002	0.2417	downregulated	16	8.23778	0.0003	downregulated	14	12.6524	3.2e-06	upregulated	33	18.7312	7.3e-09	upregulated	6	0.824165	0.4386
serine-type peptidase activity	GO	4 out of 7	18.6427	downregulated	10	4.65587	0.0095	downregulated	2	1.91596	0.1472	upregulated	4	3.52628	0.0294	downregulated	9	7.88437	0.0004	upregulated	23	12.0563	5.8e-06	downregulated	8	4.34343	0.013
regulation of cell cycle phase transition	GO	4 out of 7	18.6327	upregulated	21	1.25163	0.286	upregulated	23	6.49121	0.0015	downregulated	40	11.4674	1e-05	downregulated	27	7.31568	0.0007	upregulated	49	4.27207	0.014	upregulated	10	3.32045	0.0361
regulation of signal transduction by p53 class mediator	GO	5 out of 7	18.5459	downregulated	2	3.276	0.0378	upregulated	6	4.56879	0.0104	downregulated	14	5.47716	0.0042	downregulated	8	4.20638	0.0149	upregulated	11	5.34568	0.0048	upregulated	4	4.80945	0.0082
cellular extravasation	GO	4 out of 7	18.5376					upregulated	1	3.45688	0.0315	downregulated	2	2.386	0.092	downregulated	2	5.16999	0.0057	upregulated	10	11.6053	9.1e-06	upregulated	3	2.83315	0.0588
antimicrobial humoral response	GO	5 out of 7	18.5032	downregulated	1	1.01222	0.3634	upregulated	1	2.24599	0.1058	downregulated	9	8.67022	0.0002	downregulated	6	6.8118	0.0011	upregulated	7	3.67319	0.0254	upregulated	2	0.581747	0.5589
serine hydrolase activity	GO	4 out of 7	18.3086	downregulated	10	4.54099	0.0107	downregulated	2	1.89693	0.15	upregulated	4	3.47416	0.031	downregulated	10	7.80692	0.0004	upregulated	23	11.8631	7e-06	downregulated	8	4.32522	0.0132
superoxide metabolic process	GO	5 out of 7	18.1269	downregulated	1	0.786226	0.4556	downregulated	1	1.46283	0.2316	downregulated	6	6.14159	0.0022	downregulated	5	7.2117	0.0007	upregulated	5	1.99404	0.1361	upregulated	1	2.5246	0.0801
molting cycle	GO	5 out of 7	18.0795	upregulated	3	1.11067	0.3293	downregulated	2	3.13652	0.0434	downregulated	9	4.19823	0.015	downregulated	6	2.87181	0.0566	upregulated	13	6.83315	0.0011	upregulated	3	2.15044	0.1164
hair cycle	GO	5 out of 7	18.0795	upregulated	3	1.11067	0.3293	downregulated	2	3.13652	0.0434	downregulated	9	4.19823	0.015	downregulated	6	2.87181	0.0566	upregulated	13	6.83315	0.0011	upregulated	3	2.15044	0.1164
cell-matrix adhesion	GO	3 out of 7	18.0604	upregulated	4	1.03948	0.3536	upregulated	3	1.4364	0.2378	downregulated	10	2.61417	0.0732	downregulated	7	7.09324	0.0008	upregulated	27	18.373	1e-08	upregulated	8	10.8289	2e-05
regulation of bone development	GO	6 out of 7	18.0009	downregulated	1	1.0435	0.3522	downregulated	1	1.3412	0.2615	downregulated	1	3.96044	0.0191	downregulated	1	4.43644	0.0118	upregulated	4	5.44126	0.0043	upregulated	1	1.77809	0.169
negative regulation of G1/S transition of mitotic cell cycle	GO	5 out of 7	17.8944	downregulated	2	0.302801	0.7387	upregulated	4	2.44609	0.0866	downregulated	16	10.8128	2e-05	downregulated	10	5.82968	0.0029	upregulated	17	2.78064	0.062	upregulated	3	0.614634	0.5408
response to muscle stretch	GO	5 out of 7	17.8837					downregulated	2	5.15206	0.0058	downregulated	3	1.56672	0.2087	downregulated	2	3.44854	0.0318	upregulated	5	4.55191	0.0105	upregulated	1	3.16447	0.0422
gonad development	GO	5 out of 7	17.8291	downregulated	4	2.93951	0.0529	upregulated	7	5.48885	0.0041	downregulated	11	3.86469	0.021	downregulated	11	2.4813	0.0836	upregulated	31	12.9821	2.3e-06	downregulated	10	1.63305	0.1953	upregulated	1	2.68341	0.0683
trabecula morphogenesis	GO	5 out of 7	17.7562	downregulated	5	4.71777	0.0089					downregulated	3	1.75846	0.1723	downregulated	4	2.06494	0.1268	upregulated	11	8.36968	0.0002	downregulated	3	1.52774	0.217	upregulated	1	2.37314	0.0932
coagulation	GO	4 out of 7	17.7032	downregulated	6	0.797957	0.4502	upregulated	13	5.56025	0.0038	downregulated	24	4.39588	0.0123	downregulated	14	3.86162	0.021	upregulated	52	17.827	1.8e-08	downregulated	20	3.61906	0.0268
stem cell differentiation	GO	3 out of 7	17.6939	upregulated	9	2.15895	0.1154	upregulated	5	2.55874	0.0774	downregulated	21	18.8438	6.5e-09	downregulated	4	0.511967	0.5993	upregulated	14	4.48716	0.0113	downregulated	9	1.43132	0.239
antibacterial humoral response	GO	4 out of 7	17.6645					upregulated	1	3.25438	0.0386	downregulated	4	5.45715	0.0043	downregulated	5	9.82914	5.4e-05	upregulated	3	4.22329	0.0147	upregulated	1	1.40932	0.2443
mesenchymal cell differentiation	GO	4 out of 7	17.655	upregulated	9	3.14018	0.0433	upregulated	2	2.54587	0.0784	downregulated	16	11.1024	1.5e-05	downregulated	10	3.33488	0.0356	upregulated	22	8.87475	0.0001	downregulated	10	1.29416	0.2741	upregulated	1	1.32317	0.2663
stem cell population maintenance	GO	6 out of 7	17.6406	downregulated	5	1.34945	0.2594	upregulated	5	2.68242	0.0684	downregulated	12	2.4003	0.0907	downregulated	7	1.88426	0.1519	upregulated	22	10.8377	2e-05	upregulated	3	2.61306	0.0733	upregulated	1	1.23815	0.2899
regulation of endocytosis	GO	3 out of 7	17.6023	upregulated	12	1.69317	0.1839	upregulated	9	2.87494	0.0564	downregulated	25	9.86619	5.2e-05	downregulated	19	13.3627	1.6e-06	upregulated	38	13.6615	1.2e-06	downregulated	30	14.72	4e-07
mRNA transport	GO	5 out of 7	17.5875	downregulated	3	0.600833	0.5484	upregulated	7	1.83346	0.1599	downregulated	17	6.14146	0.0022	downregulated	14	8.99645	0.0001	upregulated	13	1.6585	0.1904	upregulated	8	2.02377	0.1322
regulation of cytokine biosynthetic process	GO	5 out of 7	17.5563	downregulated	1	0.936486	0.392	upregulated	4	8.1205	0.0003	downregulated	10	4.11067	0.0164	downregulated	9	12.6394	3.2e-06	upregulated	17	7.5591	0.0005	upregulated	1	0.431133	0.6498
virion binding	GO	3 out of 7	17.5245	downregulated	3	7.69882	0.0005													upregulated	3	6.72708	0.0012	upregulated	1	3.09862	0.0451
negative regulation of intrinsic apoptotic signaling pathway in response to DNA damage by p53 class mediator	GO	4 out of 7	17.3884	upregulated	2	1.64122	0.1937	upregulated	3	3.96048	0.0191	downregulated	1	2.92929	0.0534	downregulated	3	7.0526	0.0009	upregulated	2	5.99599	0.0025	upregulated	1	7.01224	0.0009
antigen processing and presentation of endogenous antigen	GO	4 out of 7	17.3835	upregulated	1	0.721747	0.4859					downregulated	3	4.37459	0.0126	downregulated	2	4.65109	0.0096	upregulated	7	8.77951	0.0002	upregulated	1	0.300028	0.7408
transcriptional activator activity, RNA polymerase II transcription regulatory region sequence-specific DNA binding	GO	4 out of 7	17.374	upregulated	14	2.38823	0.0918	downregulated	4	0.588054	0.5554	upregulated	8	3.20145	0.0407	downregulated	20	1.8459	0.1579	upregulated	61	18.1192	1.4e-08	downregulated	19	2.50657	0.0815	upregulated	1	2.52884	0.0798
regulation of smooth muscle cell proliferation	GO	3 out of 7	17.3618	upregulated	5	4.12165	0.0162	upregulated	3	0.606154	0.5454	upregulated	7	3.96553	0.019	downregulated	9	5.7469	0.0032	upregulated	28	17.0088	4.1e-08	upregulated	5	3.29937	0.0369
collagen-activated tyrosine kinase receptor signaling pathway	GO	4 out of 7	17.3289									downregulated	2	3.62197	0.0267	downregulated	1	3.86049	0.0211	upregulated	4	6.74918	0.0012	upregulated	1	3.09722	0.0452
negative regulation of cell cycle G1/S phase transition	GO	5 out of 7	17.3192	downregulated	2	0.290247	0.7481	upregulated	4	2.39409	0.0913	downregulated	16	10.5251	2.7e-05	downregulated	10	5.69675	0.0034	upregulated	17	2.62649	0.0723	upregulated	3	0.574716	0.5629
maintenance of cell number	GO	6 out of 7	17.1982	downregulated	5	1.30008	0.2725	upregulated	5	2.61567	0.0731	downregulated	12	2.3811	0.0924	downregulated	7	1.86574	0.1548	upregulated	22	10.4566	2.9e-05	upregulated	3	2.58907	0.0751	upregulated	1	1.22129	0.2949
regulation of hematopoietic stem cell differentiation	GO	6 out of 7	16.9641	downregulated	2	2.34411	0.0959	upregulated	2	2.21545	0.1091	downregulated	4	2.70107	0.0671	downregulated	1	0.363908	0.695	upregulated	7	5.56208	0.0038	upregulated	5	5.84679	0.0029	upregulated	1	2.36157	0.0943
antibiotic metabolic process	GO	4 out of 7	16.9346	downregulated	4	4.56499	0.0104	upregulated	3	0.996949	0.369	downregulated	9	3.35071	0.0351	downregulated	10	7.21905	0.0007	upregulated	13	4.52207	0.0109	downregulated	12	2.72225	0.0657
regulation of intrinsic apoptotic signaling pathway in response to DNA damage by p53 class mediator	GO	4 out of 7	16.9334	upregulated	2	1.53761	0.2149	upregulated	3	3.89215	0.0204	downregulated	1	2.80772	0.0603	downregulated	3	6.79771	0.0011	upregulated	2	5.87096	0.0028	upregulated	1	6.8868	0.001
extrinsic apoptotic signaling pathway	GO	4 out of 7	16.875	downregulated	2	0.365106	0.6941	upregulated	2	4.49575	0.0112	downregulated	4	6.18815	0.0021	downregulated	4	1.90173	0.1493	upregulated	21	15.9035	1.2e-07	downregulated	9	2.98766	0.0504
heart trabecula morphogenesis	GO	5 out of 7	16.8174	downregulated	4	4.30518	0.0135					downregulated	1	0.864758	0.4212	downregulated	4	2.97474	0.0511	upregulated	8	8.19366	0.0003	downregulated	3	2.20354	0.1104	upregulated	1	2.68256	0.0684
regulation of lipid metabolic process	GO	4 out of 7	16.8142	upregulated	10	0.879545	0.415	upregulated	17	4.51156	0.011	downregulated	26	4.38899	0.0124	downregulated	21	8.90836	0.0001	upregulated	47	11.4255	1.1e-05	downregulated	33	5.47048	0.0042	upregulated	1	2.95296	0.0522
positive regulation of tumor necrosis factor secretion	GO	5 out of 7	16.7733	downregulated	1	1.75978	0.1721					downregulated	3	5.94428	0.0026	downregulated	2	4.50518	0.0111	upregulated	4	3.22124	0.0399	upregulated	1	1.34283	0.2611
Fc receptor signaling pathway	GO	5 out of 7	16.6573	downregulated	7	2.87816	0.0562	downregulated	1	2.52194	0.0803	downregulated	18	8.22319	0.0003	downregulated	17	10.6847	2.3e-05	upregulated	28	5.78175	0.0031	downregulated	22	13.4324	1.5e-06
fatty acid biosynthetic process	GO	3 out of 7	16.6569	downregulated	6	6.69996	0.0012	upregulated	4	0.607512	0.5447	downregulated	10	5.30077	0.005	downregulated	7	8.06866	0.0003	upregulated	13	11.034	1.6e-05	downregulated	7	2.80499	0.0605
regulation of epithelial cell apoptotic process	GO	5 out of 7	16.6179	upregulated	2	1.89152	0.1508	downregulated	1	0.861353	0.4226	downregulated	7	2.15339	0.1161	downregulated	6	3.62465	0.0267	upregulated	15	8.97254	0.0001	upregulated	3	2.89749	0.0552
positive regulation of pri-miRNA transcription by RNA polymerase II	GO	5 out of 7	16.5906	downregulated	2	2.16831	0.1144					downregulated	3	1.27468	0.2795	downregulated	1	1.18809	0.3048	upregulated	7	10.0433	4.3e-05	upregulated	1	1.91625	0.1472
MHC protein binding	GO	5 out of 7	16.5814	downregulated	1	2.07521	0.1255	upregulated	1	2.26112	0.1042	downregulated	4	6.21452	0.002	downregulated	2	4.11171	0.0164	upregulated	5	4.87967	0.0076	upregulated	3	1.56139	0.2098
neuroblast proliferation	GO	3 out of 7	16.5429					downregulated	1	1.27517	0.2794	downregulated	6	8.01168	0.0003	downregulated	5	9.03095	0.0001	upregulated	5	4.82392	0.008	downregulated	3	1.77487	0.1695
positive regulation of leukocyte apoptotic process	GO	4 out of 7	16.5183	upregulated	2	3.84553	0.0214					downregulated	5	6.638	0.0013	downregulated	2	3.39873	0.0334	upregulated	3	4.40475	0.0122	upregulated	3	5.92234	0.0027
detoxification	GO	5 out of 7	16.4295	downregulated	2	0.873676	0.4174	upregulated	7	4.54149	0.0107	downregulated	5	5.93511	0.0026	downregulated	4	3.29929	0.0369	upregulated	17	7.54992	0.0005	upregulated	6	3.31296	0.0364
tertiary granule lumen	GO	4 out of 7	16.4105	downregulated	1	2.60215	0.0741	upregulated	1	0.878843	0.4153	downregulated	5	5.26302	0.0052	downregulated	4	6.36937	0.0017	upregulated	9	4.43277	0.0119	downregulated	3	1.37799	0.2521
positive regulation of extracellular matrix organization	GO	4 out of 7	16.394					upregulated	1	0.636653	0.5291	downregulated	4	5.41614	0.0044	downregulated	1	0.837446	0.4328	upregulated	7	9.29131	9.2e-05	upregulated	1	1.48576	0.2263
azurophil granule membrane	GO	4 out of 7	16.2869	upregulated	1	1.47773	0.2282	upregulated	5	4.32016	0.0133	downregulated	6	4.85709	0.0078	downregulated	8	10.6852	2.3e-05	upregulated	8	5.90038	0.0027	upregulated	1	0.642071	0.5262
oxidoreductase activity, acting on single donors with incorporation of molecular oxygen, incorporation of two atoms of oxygen	GO	5 out of 7	16.2841	downregulated	1	3.8895	0.0205	upregulated	1	2.28139	0.1021	downregulated	2	2.25318	0.1051	downregulated	1	4.53655	0.0107	upregulated	3	4.35287	0.0129	upregulated	2	3.53342	0.0292
protein heterodimerization activity	GO	5 out of 7	16.203	downregulated	12	2.23452	0.107	upregulated	25	11.3206	1.2e-05	downregulated	41	6.57051	0.0014	downregulated	32	8.9987	0.0001	upregulated	64	14.5684	4.7e-07	downregulated	35	5.23509	0.0053	upregulated	1	0.386492	0.6794
dendritic cell differentiation	GO	3 out of 7	16.1487	upregulated	1	1.29536	0.2738	upregulated	1	0.636653	0.5291	downregulated	6	9.18136	0.0001	downregulated	3	4.63861	0.0097	upregulated	6	4.26077	0.0141
oxidoreductase activity, acting on single donors with incorporation of molecular oxygen	GO	5 out of 7	16.1076	downregulated	1	3.8547	0.0212	upregulated	1	2.26145	0.1042	downregulated	2	2.21809	0.1088	downregulated	1	4.50037	0.0111	upregulated	3	4.29592	0.0136	upregulated	2	3.50001	0.0302
keratinocyte differentiation	GO	5 out of 7	16.0886	downregulated	4	1.38958	0.2492	downregulated	4	2.70403	0.0669	upregulated	2	1.28205	0.2775	upregulated	2	1.10688	0.3306	upregulated	9	7.62667	0.0005	upregulated	11	5.46861	0.0042	upregulated	1	1.28865	0.2756
phospholipid transport	GO	5 out of 7	15.9734	downregulated	2	0.56792	0.5667	upregulated	4	2.74759	0.0641	downregulated	7	4.52153	0.0109	downregulated	6	5.14327	0.0058	upregulated	12	8.87012	0.0001	downregulated	6	2.56817	0.0767	upregulated	1	2.18632	0.1123
tissue remodeling	GO	4 out of 7	15.9382	upregulated	4	3.13071	0.0437	upregulated	3	1.67887	0.1866	downregulated	5	2.62631	0.0723	downregulated	4	2.57181	0.0764	upregulated	17	10.6873	2.3e-05	upregulated	5	4.8624	0.0077
ficolin-1-rich granule lumen	GO	4 out of 7	15.9169	downregulated	1	1.59193	0.2035	upregulated	4	1.13804	0.3204	downregulated	10	4.91469	0.0073	downregulated	9	7.12309	0.0008	upregulated	15	3.74722	0.0236	downregulated	9	1.46005	0.2322
regulation of G1/S transition of mitotic cell cycle	GO	5 out of 7	15.9156	downregulated	3	0.292559	0.7464	upregulated	6	2.27735	0.1026	downregulated	16	5.46687	0.0042	downregulated	11	4.13568	0.016	upregulated	23	3.98846	0.0185	upregulated	4	4.3094	0.0134
positive regulation of response to wounding	GO	5 out of 7	15.8919	downregulated	3	1.7009	0.1825	upregulated	3	2.96833	0.0514	downregulated	5	3.61033	0.027	downregulated	3	1.00677	0.3654	upregulated	10	7.27586	0.0007	upregulated	1	5.2664	0.0052
negative regulation of signal transduction by p53 class mediator	GO	4 out of 7	15.8238	upregulated	3	1.40338	0.2458	upregulated	3	3.2198	0.04	downregulated	3	3.29079	0.0372	downregulated	4	5.69115	0.0034	upregulated	3	5.23943	0.0053	upregulated	1	6.22564	0.002
Fc-epsilon receptor signaling pathway	GO	3 out of 7	15.7941	upregulated	5	1.35481	0.258	upregulated	1	0.177789	0.8371	downregulated	12	7.70462	0.0005	downregulated	12	11.7208	8.1e-06	upregulated	16	5.15952	0.0057	downregulated	11	7.25823	0.0007
glial cell projection	GO	4 out of 7	15.72					downregulated	1	1.06991	0.343	downregulated	2	3.53428	0.0292	downregulated	3	4.82913	0.008	upregulated	6	8.10391	0.0003	downregulated	1	1.81723	0.1625
microtubule organizing center localization	GO	4 out of 7	15.6834	downregulated	1	1.7564	0.1727	upregulated	2	1.84986	0.1573	downregulated	8	10.24	3.6e-05	downregulated	3	3.44291	0.032	upregulated	4	3.33799	0.0355	downregulated	1	1.24405	0.2882
inner ear development	GO	5 out of 7	15.5917	upregulated	9	3.29324	0.0371	downregulated	4	2.58334	0.0755	downregulated	10	3.269	0.038	downregulated	4	2.63094	0.072	upregulated	31	13.731	1.1e-06	downregulated	13	4.99537	0.0068	upregulated	1	1.66599	0.189
dystrophin-associated glycoprotein complex	GO	5 out of 7	15.5641	upregulated	2	1.22604	0.2935	upregulated	1	1.37682	0.2524	downregulated	2	0.870935	0.4186	downregulated	1	1.3731	0.2533	upregulated	6	6.16529	0.0021	upregulated	3	6.15775	0.0021	upregulated	1	3.59991	0.0273
regulation of neutrophil migration	GO	3 out of 7	15.5617					upregulated	1	0.86054	0.4229	downregulated	6	7.20132	0.0007	downregulated	5	5.89694	0.0027	upregulated	5	5.86903	0.0028	downregulated	4	2.545	0.0785
positive regulation of interleukin-8 secretion	GO	4 out of 7	15.5512					upregulated	1	2.79718	0.061	downregulated	2	2.06073	0.1274	downregulated	3	9.19459	0.0001	upregulated	5	6.28857	0.0019	upregulated	1	0.804517	0.4473
pattern specification process	GO	6 out of 7	15.5388	downregulated	12	3.30132	0.0368	downregulated	6	2.25666	0.1047	downregulated	23	4.68378	0.0092	downregulated	14	1.59861	0.2022	upregulated	51	12.7863	2.8e-06	upregulated	14	2.34045	0.0963	upregulated	1	1.35796	0.2572
basal part of cell	GO	4 out of 7	15.5234	downregulated	1	0.506674	0.6025	upregulated	3	5.6884	0.0034	downregulated	10	11.5269	9.9e-06	downregulated	6	5.14787	0.0058	upregulated	13	10.4706	2.8e-05	downregulated	2	6.44028	0.0016
transcriptional activator activity, RNA polymerase II proximal promoter sequence-specific DNA binding	GO	5 out of 7	15.4315	upregulated	11	3.05386	0.0472	downregulated	2	0.849023	0.4278	downregulated	18	1.66553	0.1891	downregulated	10	1.16872	0.3108	upregulated	42	14.7873	3.8e-07	downregulated	12	2.87411	0.0565	upregulated	1	2.88889	0.0556
negative regulation of intrinsic apoptotic signaling pathway by p53 class mediator	GO	4 out of 7	15.4217	upregulated	3	2.25201	0.1052	upregulated	3	3.62434	0.0267	downregulated	1	2.60358	0.074	downregulated	3	6.37085	0.0017	upregulated	3	5.65991	0.0035	upregulated	1	6.66372	0.0013
carbohydrate derivative catabolic process	GO	4 out of 7	15.4066	downregulated	4	0.851337	0.4268	upregulated	9	2.70049	0.0672	upregulated	4	1.26827	0.2813	downregulated	10	6.67535	0.0013	upregulated	20	7.38513	0.0006	upregulated	4	4.46353	0.0115
establishment of RNA localization	GO	4 out of 7	15.3943	downregulated	3	0.370595	0.6903	upregulated	9	2.25228	0.1052	downregulated	20	7.38178	0.0006	downregulated	16	10.0458	4.3e-05	downregulated	30	1.5307	0.2164	upregulated	8	1.37902	0.2518
myofibril assembly	GO	5 out of 7	15.3662	upregulated	2	2.4723	0.0844	downregulated	1	0.716317	0.4885	downregulated	5	4.37864	0.0125	downregulated	2	3.43822	0.0321	upregulated	12	7.44234	0.0006	upregulated	2	1.86293	0.1552
laminin binding	GO	4 out of 7	15.3213	upregulated	1	0.264614	0.7675					downregulated	2	5.62926	0.0036	downregulated	3	4.85253	0.0078	upregulated	5	4.44786	0.0117	upregulated	1	0.656224	0.5188
transcriptional activator activity, RNA polymerase II transcription factor binding	GO	5 out of 7	15.2988	downregulated	2	2.2978	0.1005					downregulated	2	4.21778	0.0147	downregulated	2	3.67306	0.0254	upregulated	3	3.96073	0.019	upregulated	1	1.14939	0.3168
alpha-linolenic acid metabolic process	GO	6 out of 7	15.2509	downregulated	1	1.47266	0.2293	downregulated	1	1.94866	0.1425	downregulated	3	4.44548	0.0117	downregulated	3	4.93879	0.0072	upregulated	1	0.21337	0.8079	upregulated	1	2.23195	0.1073
regulation of viral process	GO	6 out of 7	15.2175	downregulated	6	1.26007	0.2836	upregulated	12	7.21233	0.0007	downregulated	8	0.962356	0.382	downregulated	3	0.554903	0.5741	upregulated	30	16.7567	5.3e-08	upregulated	7	1.80653	0.1642	upregulated	1	1.08923	0.3365
regulation of cell cycle G1/S phase transition	GO	5 out of 7	15.2054	downregulated	3	0.245004	0.7827	upregulated	6	2.0868	0.1241	downregulated	16	4.82065	0.0081	downregulated	12	4.27031	0.014	upregulated	24	3.73464	0.0239	upregulated	5	4.22162	0.0147
regulation of fatty acid transport	GO	5 out of 7	15.2024					downregulated	1	1.02018	0.3605	downregulated	2	2.70827	0.0667	downregulated	3	5.43877	0.0043	upregulated	4	3.10997	0.0446	upregulated	1	2.92521	0.0537
long-chain fatty acid binding	GO	3 out of 7	15.1839					downregulated	1	2.82665	0.0592	downregulated	3	12.4692	3.8e-06	downregulated	1	5.24738	0.0053	downregulated	1	2.20951	0.1098	downregulated	1	3.14984	0.0429
neural precursor cell proliferation	GO	4 out of 7	15.0809	upregulated	1	1.08374	0.3383	downregulated	1	0.689777	0.5017	downregulated	9	7.50455	0.0006	downregulated	7	5.13605	0.0059	upregulated	10	5.19215	0.0056	downregulated	7	2.35785	0.0946
vascular endothelial growth factor signaling pathway	GO	5 out of 7	15.0792	downregulated	3	7.75091	0.0004	downregulated	2	2.28817	0.1015	downregulated	1	2.81314	0.06	downregulated	1	1.38864	0.2494	upregulated	4	3.60372	0.0272	downregulated	1	2.76537	0.063
apoptotic signaling pathway	GO	4 out of 7	15.0778	downregulated	9	2.98238	0.0507	upregulated	7	6.80679	0.0011	downregulated	20	4.68601	0.0092	downregulated	14	3.56253	0.0284	upregulated	45	17.3761	2.8e-08	downregulated	28	6.72243	0.0012
endothelial cell differentiation	GO	4 out of 7	15.0571	downregulated	5	4.6546	0.0095	upregulated	5	3.0059	0.0495	downregulated	9	4.06683	0.0171	downregulated	4	1.9275	0.1455	upregulated	17	13.4329	1.5e-06	downregulated	6	6.01877	0.0024
negative regulation of CD4-positive, alpha-beta T cell activation	GO	3 out of 7	15.0519									downregulated	2	0.646463	0.5239					upregulated	8	8.42226	0.0002	upregulated	2	5.98322	0.0025
positive regulation of transcription from RNA polymerase II promoter involved in cellular response to chemical stimulus	GO	4 out of 7	15.0244	downregulated	2	3.66463	0.0256	upregulated	1	0.852094	0.4265	downregulated	4	3.83822	0.0215	downregulated	2	3.04528	0.0476	upregulated	7	7.8789	0.0004	downregulated	1	2.55058	0.078
perinuclear endoplasmic reticulum	GO	5 out of 7	15.0211	downregulated	1	1.42045	0.2416	upregulated	1	0.781329	0.4578	downregulated	3	2.27993	0.1023	downregulated	4	5.82809	0.0029	upregulated	4	2.97368	0.0511					upregulated	1	3.30033	0.0369
nuclear transcription factor complex	GO	5 out of 7	14.9316	downregulated	10	4.66615	0.0094	upregulated	7	1.50106	0.2229	downregulated	17	2.21675	0.109	upregulated	2	2.68584	0.0682	upregulated	28	10.9116	1.8e-05	upregulated	4	0.456613	0.6334	upregulated	1	0.867329	0.4201
dorsal/ventral pattern formation	GO	4 out of 7	14.9163	upregulated	1	0.0426825	0.9582	upregulated	2	0.539222	0.5832	downregulated	4	4.5747	0.0103	downregulated	3	1.7808	0.1685	upregulated	11	5.16138	0.0057	upregulated	2	3.98132	0.0187
cytokine secretion	GO	5 out of 7	14.9017	downregulated	1	0.420996	0.6564	upregulated	1	2.86557	0.057	downregulated	4	2.53302	0.0794	downregulated	5	6.45072	0.0016	upregulated	9	8.1133	0.0003	upregulated	1	0.249246	0.7794
negative regulation of stem cell differentiation	GO	5 out of 7	14.8778	downregulated	2	1.78791	0.1673	upregulated	2	3.02115	0.0487	downregulated	2	0.633727	0.5306					upregulated	7	8.77951	0.0002	upregulated	3	4.04761	0.0175	upregulated	1	2.65022	0.0706
steroid biosynthetic process	GO	4 out of 7	14.7961	upregulated	4	0.613946	0.5412	upregulated	6	2.57115	0.0764	downregulated	9	3.87099	0.0208	downregulated	11	8.18518	0.0003	downregulated	22	3.60555	0.0272	upregulated	5	1.31716	0.2679	upregulated	1	4.6079	0.01
regulation of apoptotic signaling pathway	GO	5 out of 7	14.7837	downregulated	7	0.545847	0.5794	upregulated	17	7.83651	0.0004	downregulated	27	4.00227	0.0183	downregulated	23	6.38055	0.0017	upregulated	58	21.3075	5.6e-10	downregulated	40	10.0767	4.2e-05	upregulated	1	0.460768	0.6308
regulation of osteoclast development	GO	3 out of 7	14.773													downregulated	1	4.97886	0.0069	upregulated	3	7.40855	0.0006	upregulated	1	2.38563	0.092
negative regulation of pri-miRNA transcription by RNA polymerase II	GO	5 out of 7	14.7264	downregulated	1	1.3399	0.2619	downregulated	1	2.78604	0.0617	downregulated	2	1.50301	0.2225	downregulated	1	1.10053	0.3327	upregulated	5	7.99693	0.0003
regulation of JAK-STAT cascade	GO	5 out of 7	14.6704	downregulated	4	2.17045	0.1141	downregulated	1	2.25252	0.1051	upregulated	3	0.527803	0.5899	downregulated	4	1.22322	0.2943	upregulated	18	8.51992	0.0002	downregulated	10	3.56848	0.0282	upregulated	1	4.60062	0.01
regulation of intrinsic apoptotic signaling pathway by p53 class mediator	GO	4 out of 7	14.6162	upregulated	3	1.94147	0.1435	upregulated	3	3.48434	0.0307	downregulated	1	2.36299	0.0941	downregulated	3	5.86856	0.0028	upregulated	4	5.409	0.0045	upregulated	1	6.40145	0.0017
positive regulation of cysteine-type endopeptidase activity	GO	4 out of 7	14.5652	downregulated	6	2.33499	0.0968	upregulated	3	4.87947	0.0076	downregulated	14	10.9912	1.7e-05	downregulated	7	1.07821	0.3402	upregulated	21	7.98031	0.0003	downregulated	8	2.94003	0.0529
nucleobase-containing compound transport	GO	4 out of 7	14.4731	downregulated	5	0.785079	0.4561	upregulated	10	2.73408	0.065	downregulated	23	7.31959	0.0007	downregulated	18	9.13209	0.0001	downregulated	36	1.5766	0.2067	upregulated	9	1.54707	0.2129
ERBB2 signaling pathway	GO	4 out of 7	14.4454	upregulated	2	0.66106	0.5163	upregulated	1	0.886455	0.4121	downregulated	2	5.48694	0.0041	downregulated	3	1.61653	0.1986	upregulated	6	5.04254	0.0065	upregulated	2	3.8469	0.0213
flavin adenine dinucleotide binding	GO	6 out of 7	14.4379	downregulated	1	0.387986	0.6784	downregulated	3	4.72071	0.0089	downregulated	5	1.68509	0.1854	downregulated	3	3.2816	0.0376	upregulated	8	3.23071	0.0395	upregulated	4	1.13182	0.3224
regulation of chemotaxis	GO	3 out of 7	14.4372	upregulated	4	1.87214	0.1538	upregulated	6	4.34453	0.013	downregulated	21	11.8089	7.4e-06	downregulated	13	7.78224	0.0004	upregulated	24	6.40294	0.0017	downregulated	17	5.34028	0.0048
regulation of viral life cycle	GO	6 out of 7	14.4332	downregulated	6	2.05323	0.1283	upregulated	11	8.79286	0.0002	downregulated	5	1.18592	0.3055	downregulated	1	0.731881	0.481	upregulated	24	15.6457	1.6e-07	upregulated	5	2.30125	0.1001	upregulated	1	1.30812	0.2703
phosphatidylinositol phosphate binding	GO	5 out of 7	14.4174	downregulated	5	3.14284	0.0432	upregulated	1	1.76591	0.171	downregulated	14	5.67899	0.0034	downregulated	10	6.85971	0.001	upregulated	22	5.65185	0.0035	downregulated	18	7.85163	0.0004	upregulated	1	2.70152	0.0671
regulation of organ growth	GO	5 out of 7	14.3982	upregulated	6	3.97103	0.0189	downregulated	3	1.68436	0.1856	downregulated	8	4.7784	0.0084	downregulated	6	2.64051	0.0713	upregulated	16	10.9839	1.7e-05	downregulated	7	5.42248	0.0044	upregulated	2	3.70454	0.0246
regulation of epidermis development	GO	5 out of 7	14.2409	downregulated	2	2.46379	0.0851	upregulated	2	1.22491	0.2938	downregulated	7	0.894823	0.4087	downregulated	3	0.58012	0.5598	upregulated	16	9.3399	8.8e-05	upregulated	4	2.18715	0.1122
response to fungus	GO	4 out of 7	14.2014	upregulated	1	0.459693	0.6315	upregulated	2	2.84324	0.0582	downregulated	6	7.11469	0.0008	downregulated	3	5.16714	0.0057	upregulated	6	4.0513	0.0174	upregulated	1	1.17124	0.31
roof of mouth development	GO	4 out of 7	14.1857	upregulated	5	3.24736	0.0389					upregulated	7	4.05233	0.0174	downregulated	2	0.94497	0.3887	upregulated	19	12.5094	3.7e-06	upregulated	2	2.96252	0.0517	upregulated	1	1.82114	0.1618
amelogenesis	GO	4 out of 7	14.1242	downregulated	2	3.31063	0.0365					downregulated	2	0.676393	0.5084					upregulated	6	6.00009	0.0025	upregulated	1	4.13706	0.016
SH3 domain binding	GO	5 out of 7	14.0728	downregulated	7	5.09353	0.0061	downregulated	2	0.326291	0.7216	downregulated	16	9.53252	7.2e-05	downregulated	8	4.70227	0.0091	upregulated	20	6.27807	0.0019	downregulated	21	11.8599	7.1e-06
secondary palate development	GO	4 out of 7	14.069	downregulated	2	2.21841	0.1088					downregulated	3	3.08895	0.0455					upregulated	6	5.74172	0.0032					upregulated	1	3.01991	0.0488
odontogenesis	GO	5 out of 7	14.0605	downregulated	4	1.73558	0.1763	upregulated	1	1.34714	0.26	downregulated	7	1.82988	0.1604	downregulated	3	0.83417	0.4342	upregulated	19	8.49445	0.0002	upregulated	2	2.51357	0.081
cell maturation	GO	4 out of 7	13.9436	downregulated	4	3.66704	0.0256	upregulated	1	3.7497	0.0235	downregulated	17	6.18724	0.0021	downregulated	9	6.13573	0.0022	downregulated	21	2.63887	0.0714	upregulated	8	1.7033	0.1821
HMG box domain binding	GO	4 out of 7	13.897	upregulated	1	4.21007	0.0148					downregulated	4	5.91812	0.0027	downregulated	2	3.19957	0.0408	upregulated	4	4.4612	0.0115	upregulated	3	4.5282	0.0108
intestinal absorption	GO	4 out of 7	13.8813					upregulated	1	0.644161	0.5251	downregulated	2	0.442774	0.6423	downregulated	3	4.23429	0.0145	upregulated	5	5.94504	0.0026	upregulated	1	3.90334	0.0202
regulation of DNA biosynthetic process	GO	4 out of 7	13.8425	upregulated	8	3.51484	0.0298	upregulated	5	2.81995	0.0596	downregulated	10	6.12263	0.0022	downregulated	7	5.20503	0.0055	upregulated	13	3.545	0.0289	upregulated	6	2.48463	0.0834
negative regulation of endothelial cell apoptotic process	GO	5 out of 7	13.7951	downregulated	1	0.818305	0.4412					downregulated	2	0.910515	0.4023	downregulated	3	4.25831	0.0141	upregulated	4	4.27855	0.0139	upregulated	2	3.52943	0.0293
cadherin binding involved in cell-cell adhesion	GO	3 out of 7	13.7723	downregulated	1	1.71588	0.1798	upregulated	1	1.30719	0.2706	upregulated	2	3.00014	0.0498	upregulated	1	3.09115	0.0454	upregulated	7	13.2307	1.8e-06	upregulated	3	6.2242	0.002
protein binding involved in heterotypic cell-cell adhesion	GO	3 out of 7	13.7671									downregulated	3	7.1672	0.0008	downregulated	1	2.9585	0.0519	upregulated	2	3.64144	0.0262
regulation of plasma lipoprotein particle levels	GO	4 out of 7	13.7343	downregulated	1	0.351697	0.7035	upregulated	4	3.16975	0.042	downregulated	6	6.1729	0.0021	downregulated	5	7.25437	0.0007	upregulated	8	4.27982	0.0138	downregulated	5	1.15477	0.3151
epiboly	GO	3 out of 7	13.6498	upregulated	1	2.44657	0.0866	upregulated	2	1.307	0.2706	upregulated	1	1.81131	0.1634	downregulated	1	3.30451	0.0367	upregulated	8	9.44782	7.9e-05	upregulated	3	6.46235	0.0016
positive regulation of cysteine-type endopeptidase activity involved in apoptotic signaling pathway	GO	4 out of 7	13.5808	upregulated	1	0.906817	0.4038					downregulated	3	6.15784	0.0021	downregulated	1	1.15834	0.314	upregulated	4	5.7709	0.0031	upregulated	1	1.40053	0.2465
regulation of adherens junction organization	GO	5 out of 7	13.5426	downregulated	2	2.89262	0.0554	downregulated	1	1.24374	0.2883	downregulated	9	5.79485	0.003	downregulated	6	3.52376	0.0295	upregulated	8	3.30202	0.0368	downregulated	7	3.2144	0.0402
mitotic DNA damage checkpoint	GO	4 out of 7	13.5358	upregulated	5	0.356425	0.7002	upregulated	6	2.63809	0.0715	downregulated	14	10.0344	4.4e-05	downregulated	10	5.66885	0.0035	upregulated	9	0.544237	0.5803	upregulated	2	0.282769	0.7537
cranial skeletal system development	GO	5 out of 7	13.5307	upregulated	1	2.36028	0.0944					downregulated	9	4.32124	0.0133	downregulated	3	1.0805	0.3394	upregulated	11	5.423	0.0044	upregulated	2	3.24789	0.0389	upregulated	1	1.81833	0.1623
renal tubule morphogenesis	GO	5 out of 7	13.4959	upregulated	4	2.66735	0.0694	downregulated	3	2.59636	0.0745	downregulated	7	6.34919	0.0017	downregulated	4	3.51447	0.0298	upregulated	9	3.63701	0.0263	upregulated	1	0.0662472	0.9359
inflammasome complex	GO	5 out of 7	13.4679	downregulated	1	1.53335	0.2158					downregulated	2	1.94008	0.1437	downregulated	2	3.90407	0.0202	upregulated	4	4.5956	0.0101	upregulated	1	1.4948	0.2243
cortical actin cytoskeleton	GO	4 out of 7	13.3015	downregulated	4	4.13828	0.016	upregulated	2	0.488425	0.6136	downregulated	14	10.5079	2.7e-05	downregulated	5	1.60949	0.2	upregulated	14	4.75634	0.0086	downregulated	12	7.22209	0.0007
negative regulation of sprouting angiogenesis	GO	4 out of 7	13.2647	downregulated	3	4.22399	0.0146	upregulated	1	0.484344	0.6161	downregulated	2	4.57412	0.0103	downregulated	3	3.40324	0.0333	upregulated	4	2.93668	0.053	downregulated	2	1.38898	0.2493
response to starvation	GO	5 out of 7	13.2642	downregulated	3	4.11197	0.0164	upregulated	5	1.29604	0.2736	downregulated	13	3.43703	0.0322	downregulated	10	4.78126	0.0084	upregulated	21	3.10826	0.0447	downregulated	17	4.58884	0.0102	upregulated	1	3.71061	0.0245
body fluid secretion	GO	3 out of 7	13.2542	downregulated	2	2.61831	0.0729	upregulated	1	1.92434	0.146	upregulated	2	0.59033	0.5541	upregulated	1	1.28976	0.2753	upregulated	7	3.88299	0.0206	upregulated	8	9.37139	8.5e-05	upregulated	1	5.06895	0.0063
transcription factor activity, transcription factor binding	GO	5 out of 7	13.2511	downregulated	2	0.572956	0.5639	upregulated	4	3.16025	0.0424	downregulated	2	2.97711	0.0509	downregulated	5	2.97235	0.0512	upregulated	11	9.85328	5.3e-05	downregulated	5	1.72681	0.1779	upregulated	1	1.76246	0.1716
signal transduction by p53 class mediator	GO	5 out of 7	13.2003	downregulated	1	1.66193	0.1898	upregulated	5	1.99019	0.1367	downregulated	12	4.45862	0.0116	downregulated	6	2.20759	0.11	upregulated	19	5.30895	0.0049	upregulated	4	1.55344	0.2115
cellular response to thyroid hormone stimulus	GO	4 out of 7	13.1691					upregulated	1	2.15853	0.1155	downregulated	1	2.90874	0.0545	downregulated	2	4.90414	0.0074	upregulated	3	4.10893	0.0164	upregulated	1	1.2473	0.2873
regulation of dendritic cell differentiation	GO	2 out of 7	13.1569									downregulated	1	1.0102	0.3641					upregulated	8	12.1467	5.3e-06
mitotic cell cycle arrest	GO	4 out of 7	13.0996	upregulated	1	0.532666	0.587					downregulated	2	3.38069	0.034	downregulated	1	0.767071	0.4644	upregulated	5	6.37538	0.0017	upregulated	1	3.10918	0.0446
nail development	GO	3 out of 7	13.0334	downregulated	1	2.65338	0.0704													upregulated	3	5.50511	0.0041	upregulated	2	4.87496	0.0076
defense response to fungus	GO	4 out of 7	13.0066					upregulated	1	0.748987	0.4728	downregulated	3	6.84681	0.0011	downregulated	1	1.40128	0.2463	upregulated	3	4.07434	0.017	upregulated	1	1.43312	0.2386
regulation of response to DNA damage stimulus	GO	3 out of 7	13.0007	upregulated	14	1.61463	0.199	upregulated	11	2.90297	0.0549	upregulated	7	1.96739	0.1398	downregulated	15	10.0363	4.4e-05	upregulated	21	5.00234	0.0067	upregulated	6	4.44714	0.0117
antimicrobial humoral immune response mediated by antimicrobial peptide	GO	5 out of 7	12.9772	downregulated	1	1.45272	0.2339	upregulated	1	2.75095	0.0639	downregulated	6	4.45586	0.0116	downregulated	4	5.28681	0.0051	upregulated	3	3.58806	0.0277	upregulated	2	0.944715	0.3888
lung alveolus development	GO	5 out of 7	12.9568	downregulated	1	1.45462	0.2335	upregulated	1	0.607491	0.5447	downregulated	6	5.70897	0.0033	downregulated	3	2.78365	0.0618	upregulated	6	2.17712	0.1134	upregulated	1	1.43997	0.2369
regulation of membrane lipid distribution	GO	4 out of 7	12.8652	downregulated	2	1.50893	0.2211	upregulated	2	1.52656	0.2173	downregulated	4	4.44116	0.0118	downregulated	4	4.97507	0.0069	upregulated	8	7.488	0.0006	downregulated	3	4.02135	0.0179
biomineral tissue development	GO	4 out of 7	12.8511	downregulated	3	1.59776	0.2024	upregulated	2	0.805108	0.447	downregulated	5	4.0446	0.0175	downregulated	1	1.39182	0.2486	upregulated	11	9.12224	0.0001	downregulated	7	2.50021	0.0821
response to angiotensin	GO	3 out of 7	12.7636					upregulated	2	2.75104	0.0639	downregulated	3	1.4214	0.2414	downregulated	3	4.35126	0.0129	upregulated	9	10.9647	1.7e-05	downregulated	2	1.22273	0.2944
cysteine-type endopeptidase activity involved in apoptotic process	GO	4 out of 7	12.7622	downregulated	1	1.67641	0.187	upregulated	1	0.874924	0.4169	upregulated	1	0.852954	0.4262	downregulated	1	1.87014	0.1541	upregulated	6	8.19797	0.0003	upregulated	2	2.7456	0.0642
anterior/posterior pattern specification	GO	6 out of 7	12.7398	upregulated	10	1.94932	0.1424	downregulated	3	1.82181	0.1617	downregulated	14	1.77839	0.1689	downregulated	6	1.02223	0.3598	upregulated	24	5.46343	0.0042	upregulated	7	0.643174	0.5256	upregulated	1	2.01078	0.1339
negative regulation of protein localization to nucleus	GO	6 out of 7	12.6672	downregulated	2	1.61722	0.1985	downregulated	1	4.74815	0.0087	downregulated	2	1.1678	0.3111	downregulated	2	2.55189	0.0779	upregulated	5	4.31223	0.0134	downregulated	4	4.21417	0.0148	upregulated	1	2.48404	0.0834
detection of biotic stimulus	GO	3 out of 7	12.6546					upregulated	1	3.61585	0.0269	downregulated	1	0.622947	0.5364	downregulated	3	6.13048	0.0022	upregulated	5	9.51703	7.4e-05
hydrolase activity, acting on glycosyl bonds	GO	4 out of 7	12.6464	downregulated	3	1.68707	0.1851	upregulated	3	0.596034	0.551	downregulated	12	5.62137	0.0036	downregulated	9	6.83508	0.0011	upregulated	5	1.37206	0.2536	downregulated	6	2.27316	0.103
ERBB signaling pathway	GO	4 out of 7	12.6439	downregulated	4	1.70301	0.1821	upregulated	2	1.09387	0.3349	downregulated	6	3.89073	0.0204	downregulated	6	2.00662	0.1344	upregulated	16	11.05	1.6e-05	downregulated	9	4.9126	0.0074
natural killer cell activation	GO	4 out of 7	12.6401	downregulated	1	0.911967	0.4017	upregulated	2	0.956467	0.3842	upregulated	3	1.84597	0.1579	downregulated	2	4.11239	0.0164	upregulated	8	4.73451	0.0088	upregulated	5	3.83773	0.0215
embryonic digit morphogenesis	GO	3 out of 7	12.6161	upregulated	5	1.61912	0.1981	downregulated	1	2.90025	0.055	upregulated	2	0.839494	0.4319	upregulated	1	0.918966	0.3989	upregulated	16	9.6623	6.4e-05	upregulated	3	3.43113	0.0324
establishment of mitotic spindle localization	GO	4 out of 7	12.5567	downregulated	1	1.85016	0.1572	upregulated	1	0.749244	0.4727	downregulated	6	6.96185	0.0009	downregulated	3	3.54785	0.0288	upregulated	1	2.07611	0.1254	downregulated	2	1.13007	0.323
positive regulation of vascular endothelial cell proliferation	GO	5 out of 7	12.4957	downregulated	1	1.0435	0.3522	downregulated	1	1.86215	0.1553	downregulated	2	2.22702	0.1078					upregulated	3	4.49814	0.0111	upregulated	2	2.8649	0.057
muscle cell proliferation	GO	5 out of 7	12.4888	downregulated	1	1.01683	0.3617					downregulated	1	0.606957	0.545	downregulated	1	1.12694	0.324	upregulated	7	10.8718	1.9e-05	downregulated	4	4.51385	0.011	upregulated	1	3.38017	0.034
defense response to Gram-negative bacterium	GO	5 out of 7	12.4272	downregulated	2	1.07888	0.34	upregulated	2	2.36916	0.0936	downregulated	4	4.17137	0.0154	downregulated	4	4.97216	0.0069	upregulated	10	3.81205	0.0221	upregulated	2	0.761899	0.4668
lactation	GO	4 out of 7	12.3325	downregulated	1	2.99215	0.0502	upregulated	1	2.28547	0.1017	downregulated	3	0.510159	0.6004					downregulated	5	0.808611	0.4455	upregulated	4	5.66188	0.0035	upregulated	1	5.45377	0.0043
cell recognition	GO	5 out of 7	12.2912	downregulated	7	2.6108	0.0735	upregulated	1	0.878474	0.4154	downregulated	8	2.4542	0.0859	downregulated	4	2.60134	0.0742	downregulated	26	6.95219	0.001	upregulated	7	4.24798	0.0143	upregulated	1	1.25534	0.285
fluid transport	GO	2 out of 7	12.2715	upregulated	1	0.320292	0.7259	upregulated	1	3.37797	0.0341									upregulated	6	11.8452	7.2e-06	upregulated	3	4.12454	0.0162
negative regulation of bone development	GO	3 out of 7	12.2662									downregulated	1	4.77631	0.0084					upregulated	1	4.92988	0.0072	upregulated	1	2.56005	0.0773
mammary gland lobule development	GO	3 out of 7	12.2522	downregulated	1	3.82826	0.0217													upregulated	3	2.59303	0.0748	upregulated	4	5.83096	0.0029
positive regulation of establishment of protein localization	GO	5 out of 7	12.2462	downregulated	10	1.00431	0.3663	upregulated	14	2.50234	0.0819	downregulated	28	2.29882	0.1004	downregulated	19	5.76786	0.0031	upregulated	64	17.774	1.9e-08	downregulated	51	15.9295	1.2e-07	upregulated	1	1.33065	0.2643
lipoprotein particle	GO	4 out of 7	12.2107					upregulated	2	1.307	0.2706	downregulated	1	0.139817	0.8695	downregulated	1	3.01773	0.0489	upregulated	7	7.9933	0.0003	upregulated	4	2.36687	0.0938
negative regulation of epithelial cell apoptotic process	GO	5 out of 7	12.1997	downregulated	1	0.479945	0.6188	upregulated	2	0.930471	0.3944	downregulated	2	0.402024	0.669	downregulated	3	3.46657	0.0312	upregulated	7	4.47969	0.0113	upregulated	3	4.3019	0.0135
posttranscriptional gene silencing	GO	5 out of 7	12.1633	downregulated	1	0.2464	0.7816	upregulated	2	1.3047	0.2713	downregulated	11	4.94745	0.0071	downregulated	7	5.08059	0.0062	upregulated	7	2.30555	0.0997	upregulated	3	0.887971	0.4115
IRES-dependent viral translational initiation	GO	3 out of 7	12.1082									downregulated	3	4.77413	0.0084	downregulated	2	5.08038	0.0062	upregulated	2	3.64144	0.0262	downregulated	1	1.38772	0.2496
regulation of endothelial cell apoptotic process	GO	5 out of 7	12.071	upregulated	2	2.41038	0.0898	downregulated	1	1.30595	0.2709	downregulated	3	1.56754	0.2086	downregulated	4	3.65201	0.0259	upregulated	8	4.79462	0.0083	upregulated	2	3.16124	0.0424
oxidoreductase activity, acting on peroxide as acceptor	GO	4 out of 7	12.0376	downregulated	1	0.718808	0.4873	downregulated	1	1.16766	0.3111	downregulated	4	6.83376	0.0011	downregulated	3	4.02889	0.0178	upregulated	3	2.2587	0.1045	downregulated	2	1.80258	0.1649
nitric oxide metabolic process	GO	3 out of 7	11.9867													downregulated	1	3.57293	0.0281	upregulated	4	5.99755	0.0025	upregulated	2	2.41627	0.0893
complement activation, classical pathway	GO	4 out of 7	11.9706	downregulated	3	2.62554	0.0724					downregulated	2	0.618713	0.5386	downregulated	3	6.76083	0.0012	upregulated	11	23.012	1e-10	upregulated	3	1.96553	0.1401
regulation of binding	GO	5 out of 7	11.9555	downregulated	8	2.02254	0.1323	downregulated	5	3.61193	0.027	downregulated	21	1.48397	0.2267	upregulated	7	3.32468	0.036	upregulated	51	11.9743	6.3e-06	downregulated	31	4.4678	0.0115	upregulated	1	0.655186	0.5193
autolysosome	GO	3 out of 7	11.9178									downregulated	2	4.58919	0.0102	downregulated	3	6.78428	0.0011	downregulated	1	1.57265	0.2075	upregulated	1	2.11697	0.1204
phosphatidylglycerol binding	GO	3 out of 7	11.8225	upregulated	1	1.33048	0.2644													upregulated	4	4.5956	0.0101	upregulated	1	4.34682	0.0129	upregulated	1	4.21056	0.0148
transcription cofactor binding	GO	3 out of 7	11.817	upregulated	2	0.352693	0.7028	upregulated	3	0.98494	0.3735	downregulated	3	3.27611	0.0378	downregulated	2	2.73997	0.0646	upregulated	11	8.48097	0.0002	downregulated	3	1.34238	0.2612
oxidoreductase activity, oxidizing metal ions	GO	3 out of 7	11.7834	upregulated	1	1.42298	0.241					downregulated	1	1.00718	0.3652	upregulated	1	2.68796	0.068	upregulated	4	7.47933	0.0006	upregulated	2	7.40786	0.0006
sarcolemma	GO	4 out of 7	11.7744	upregulated	5	1.31315	0.269	upregulated	5	5.19995	0.0055	downregulated	9	3.34113	0.0354	downregulated	4	2.36597	0.0939	upregulated	29	17.4892	2.5e-08	upregulated	10	10.7775	2.1e-05	upregulated	1	1.80292	0.1648
neurotransmitter metabolic process	GO	3 out of 7	11.7618	downregulated	3	4.0988	0.0166	upregulated	3	0.442767	0.6423	upregulated	6	4.20753	0.0149	downregulated	5	5.22666	0.0054	upregulated	13	7.43041	0.0006	downregulated	7	4.55131	0.0106
promoter-specific chromatin binding	GO	5 out of 7	11.7362	downregulated	1	1.2069	0.2991					downregulated	6	3.51345	0.0298	downregulated	3	2.97432	0.0511	upregulated	6	2.47525	0.0841	upregulated	1	1.56632	0.2088
positive regulation of transcription regulatory region DNA binding	GO	4 out of 7	11.6228	downregulated	1	1.50748	0.2215	upregulated	1	1.60449	0.201	downregulated	2	4.35572	0.0128	downregulated	2	3.8103	0.0221	upregulated	5	3.5538	0.0286
regulation of chromatin organization	GO	6 out of 7	11.6111	downregulated	4	2.04724	0.1291	downregulated	3	3.15678	0.0426	downregulated	15	2.05426	0.1282	downregulated	10	2.12172	0.1198	upregulated	17	0.682172	0.5055	upregulated	7	1.5489	0.2125
RNA transport	GO	4 out of 7	11.5825	downregulated	3	0.394156	0.6742	upregulated	9	2.35557	0.0948	downregulated	19	5.52713	0.004	downregulated	15	8.15931	0.0003	downregulated	29	1.55016	0.2122	upregulated	8	1.40762	0.2447
hydrolase activity, hydrolyzing N-glycosyl compounds	GO	4 out of 7	11.5793					upregulated	1	1.56838	0.2084	downregulated	2	3.05445	0.0471	downregulated	3	3.96367	0.019	upregulated	2	1.62585	0.1967	upregulated	2	4.50374	0.0111
regulation of non-canonical Wnt signaling pathway	GO	3 out of 7	11.5526	downregulated	1	3.04712	0.0475					downregulated	2	1.72781	0.1777					upregulated	5	7.16675	0.0008	downregulated	1	0.389082	0.6777
positive regulation of intrinsic apoptotic signaling pathway	GO	4 out of 7	11.5417	downregulated	3	1.88933	0.1512	upregulated	2	2.15031	0.1164	downregulated	7	8.18974	0.0003	downregulated	2	0.626499	0.5345	upregulated	5	3.4185	0.0328	downregulated	2	0.432042	0.6492
reactive oxygen species biosynthetic process	GO	3 out of 7	11.5373									downregulated	2	1.59674	0.2026	downregulated	2	3.35094	0.0351	upregulated	6	7.89783	0.0004	downregulated	1	1.30817	0.2703
regulation of extrinsic apoptotic signaling pathway	GO	3 out of 7	11.5192	upregulated	6	1.18027	0.3072	upregulated	9	8.95251	0.0001	upregulated	5	1.30819	0.2703	downregulated	10	2.13265	0.1185	upregulated	34	22.2488	2.2e-10	downregulated	12	2.43281	0.0878	upregulated	1	1.01158	0.3636
14-3-3 protein binding	GO	4 out of 7	11.4955	downregulated	4	6.24775	0.0019					downregulated	1	1.00243	0.367	downregulated	2	2.3148	0.0988	upregulated	6	7.84283	0.0004	downregulated	6	5.91232	0.0027
viral genome replication	GO	4 out of 7	11.462	upregulated	2	1.13827	0.3204	downregulated	1	4.17328	0.0154	downregulated	3	2.6901	0.0679	downregulated	1	2.04522	0.1294	upregulated	5	4.83761	0.0079	downregulated	2	1.14596	0.3179
chaperone binding	GO	5 out of 7	11.4143	upregulated	5	1.35385	0.2582	downregulated	2	0.515961	0.5969	downregulated	8	3.7505	0.0235	downregulated	2	0.241805	0.7852	upregulated	10	5.71743	0.0033	upregulated	3	5.74039	0.0032	upregulated	1	2.5195	0.0805
positive regulation of mitotic cell cycle phase transition	GO	5 out of 7	11.3009	upregulated	2	0.273227	0.7609	downregulated	1	1.19315	0.3033	downregulated	5	1.29448	0.274	downregulated	2	0.783109	0.457	upregulated	7	3.31728	0.0363	upregulated	1	4.98613	0.0068
amine catabolic process	GO	3 out of 7	11.2697	downregulated	2	2.68992	0.0679					upregulated	2	3.96294	0.019	downregulated	2	2.90446	0.0548	upregulated	5	5.67528	0.0034
regulation of epithelial cell differentiation involved in kidney development	GO	3 out of 7	11.1544	upregulated	1	0.797152	0.4506	upregulated	1	2.59257	0.0748	upregulated	1	1.72596	0.178	downregulated	1	2.09741	0.1228	upregulated	4	10.9715	1.7e-05					upregulated	1	3.20121	0.0407
embryonic pattern specification	GO	5 out of 7	11.1491	downregulated	4	2.42434	0.0885	downregulated	1	2.9808	0.0508	downregulated	4	4.00523	0.0182	upregulated	1	0.918966	0.3989	upregulated	7	2.362	0.0942	upregulated	1	0.295697	0.744
regulation of viral genome replication	GO	4 out of 7	11.1422	downregulated	5	2.65344	0.0704	upregulated	8	8.49811	0.0002	downregulated	1	0.0123737	0.9877					upregulated	17	15.0447	2.9e-07	upregulated	4	1.92985	0.1452
chemoattractant activity	GO	4 out of 7	11.1318	downregulated	1	3.61566	0.0269	downregulated	1	1.16032	0.3134	downregulated	2	3.61566	0.0269					upregulated	4	4.77684	0.0084	downregulated	2	2.03671	0.1305
basal plasma membrane	GO	4 out of 7	11.1294	downregulated	1	0.799626	0.4495	upregulated	2	6.09359	0.0023	downregulated	6	9.00995	0.0001	downregulated	4	4.81244	0.0081	upregulated	8	9.4568	7.8e-05	downregulated	2	6.85579	0.0011
plasma membrane raft	GO	3 out of 7	11.065	upregulated	4	2.24313	0.1061	upregulated	5	8.77123	0.0002	downregulated	11	7.23228	0.0007	downregulated	6	5.23147	0.0053	upregulated	20	13.0727	2.1e-06	downregulated	9	3.45705	0.0315
regulation of development, heterochronic	GO	4 out of 7	11.0434	downregulated	1	1.35223	0.2587	upregulated	1	1.63685	0.1946	downregulated	2	4.19569	0.0151	downregulated	2	2.54566	0.0784	upregulated	3	4.58665	0.0102
asymmetric stem cell division	GO	4 out of 7	11.0279	upregulated	1	1.07341	0.3418	downregulated	1	4.82294	0.008	downregulated	1	1.67922	0.1865	downregulated	2	3.27727	0.0377	upregulated	3	4.88589	0.0076	downregulated	2	2.56399	0.077
branching morphogenesis of an epithelial tube	GO	4 out of 7	10.8901	downregulated	8	3.23695	0.0393	upregulated	2	1.02432	0.359	downregulated	11	4.71845	0.0089	upregulated	1	0.778667	0.459	upregulated	24	9.91335	5e-05	downregulated	6	6.32457	0.0018	upregulated	1	1.14895	0.317
extrinsic apoptotic signaling pathway in absence of ligand	GO	4 out of 7	10.8457	downregulated	2	1.61251	0.1994					downregulated	2	5.79806	0.003	downregulated	1	0.319393	0.7266	upregulated	6	5.90488	0.0027	downregulated	4	2.78911	0.0615
asymmetric cell division	GO	4 out of 7	10.808	upregulated	1	0.593916	0.5522	downregulated	1	4.38326	0.0125	downregulated	1	1.11692	0.3273	downregulated	2	2.13526	0.1182	upregulated	4	5.61195	0.0037	downregulated	2	1.84551	0.1579
microvillus	GO	2 out of 7	10.7988	downregulated	2	3.69967	0.0247	upregulated	2	1.24111	0.2891	downregulated	10	6.01307	0.0024	downregulated	7	9.59909	6.8e-05	upregulated	17	12.2153	5e-06	upregulated	7	7.85321	0.0004	upregulated	1	2.94556	0.0526
complement activation	GO	4 out of 7	10.7252	downregulated	3	2.1927	0.1116					downregulated	3	1.04207	0.3527	downregulated	3	6.21647	0.002	upregulated	18	26.1225	4.5e-12	upregulated	3	1.27392	0.2797
regulation of integrin-mediated signaling pathway	GO	3 out of 7	10.6853					upregulated	1	3.58182	0.0278	downregulated	2	3.83882	0.0215	downregulated	2	2.82179	0.0595	upregulated	6	9.5595	7.1e-05	downregulated	2	1.95296	0.1419
neuronal stem cell population maintenance	GO	4 out of 7	10.6383	downregulated	2	1.70671	0.1815	upregulated	1	0.429701	0.6507	downregulated	2	1.12785	0.3237	upregulated	1	1.63214	0.1955	upregulated	7	5.59365	0.0037	upregulated	1	4.27189	0.014
interleukin-2 production	GO	1 out of 7	10.6138																	upregulated	5	10.6138	2.5e-05
oxidoreductase activity, acting on the CH-CH group of donors, NAD or NADP as acceptor	GO	4 out of 7	10.5646	downregulated	1	1.783	0.1681	upregulated	1	2.63523	0.0717	downregulated	2	1.06826	0.3436	downregulated	4	8.44728	0.0002	upregulated	5	3.74955	0.0235	upregulated	2	1.90129	0.1494
adaptive thermogenesis	GO	4 out of 7	10.5392	downregulated	1	1.13213	0.3223					downregulated	5	5.65719	0.0035					upregulated	2	0.44042	0.6438	upregulated	2	3.30948	0.0365
transcription coactivator binding	GO	3 out of 7	10.5229	upregulated	1	0.292769	0.7462					downregulated	1	0.278813	0.7567					upregulated	7	9.93253	4.9e-05	upregulated	1	0.604304	0.5465
regulation of myoblast fusion	GO	4 out of 7	10.5128					upregulated	2	1.49955	0.2232	downregulated	1	1.62755	0.1964	downregulated	1	2.69396	0.0676	upregulated	5	6.24397	0.0019	upregulated	1	1.44688	0.2353
epithelial cell apoptotic process	GO	4 out of 7	10.4932					downregulated	1	3.75757	0.0233	downregulated	4	2.01901	0.1328	downregulated	2	1.62458	0.197	upregulated	5	3.92211	0.0198	downregulated	2	0.830038	0.436
regulation of protein localization to nucleus	GO	6 out of 7	10.4811	downregulated	4	1.66018	0.1901	downregulated	1	3.57653	0.028	downregulated	6	1.13581	0.3212	downregulated	5	1.21787	0.2959	upregulated	17	4.51476	0.0109	downregulated	11	3.02197	0.0487	upregulated	1	1.39794	0.2471
intrinsic apoptotic signaling pathway by p53 class mediator	GO	5 out of 7	10.4765	downregulated	1	2.47374	0.0843	downregulated	1	0.886383	0.4121	upregulated	1	2.8815	0.0561	downregulated	2	1.06603	0.3444	upregulated	10	6.58233	0.0014	upregulated	2	2.34953	0.0954
carbohydrate derivative transport	GO	5 out of 7	10.4683	downregulated	2	1.12191	0.3257	downregulated	2	2.78228	0.0619	downregulated	5	2.77562	0.0623	downregulated	4	3.58376	0.0278	downregulated	8	2.24	0.1065	upregulated	2	2.44475	0.0867
positive regulation of ERBB signaling pathway	GO	4 out of 7	10.438	downregulated	3	4.77867	0.0084	upregulated	1	0.652769	0.5206	downregulated	4	4.47847	0.0114	downregulated	2	1.33126	0.2641	downregulated	4	2.01181	0.1337	upregulated	1	2.5142	0.0809
regulation of apoptotic process involved in development	GO	2 out of 7	10.4372	downregulated	2	2.72952	0.0653													upregulated	4	7.70769	0.0004
centriole assembly	GO	5 out of 7	10.3978					downregulated	1	2.50737	0.0815	downregulated	5	3.3547	0.0349	downregulated	2	1.44757	0.2351	upregulated	4	2.47472	0.0842	upregulated	1	0.61344	0.5415
positive regulation of G1/S transition of mitotic cell cycle	GO	4 out of 7	10.3665	downregulated	1	0.581792	0.5589	downregulated	1	2.29813	0.1004	upregulated	1	1.19647	0.3023	upregulated	1	1.27759	0.2787	upregulated	4	4.11082	0.0164	upregulated	1	5.84981	0.0029
regulation of animal organ morphogenesis	GO	3 out of 7	10.3452	upregulated	13	2.89404	0.0554	downregulated	7	2.91999	0.0539	downregulated	19	3.77391	0.023	upregulated	1	1.64136	0.1937	upregulated	34	13.0488	2.2e-06	downregulated	20	4.86212	0.0077
digestive tract development	GO	4 out of 7	10.3149	downregulated	5	2.40535	0.0902	upregulated	3	4.65388	0.0095	downregulated	9	1.70586	0.1816	upregulated	1	1.18588	0.3055	upregulated	20	9.64609	6.5e-05	upregulated	3	2.39734	0.091
ectoderm development	GO	3 out of 7	10.3092									downregulated	4	5.28378	0.0051	downregulated	1	0.743638	0.4754	upregulated	4	3.73522	0.0239	downregulated	1	0.37665	0.6862	upregulated	1	4.6584	0.0095
negative regulation of viral process	GO	5 out of 7	10.256	downregulated	4	1.82683	0.1609	upregulated	7	6.86903	0.001	upregulated	1	0.483068	0.6169	downregulated	1	0.285614	0.7516	upregulated	17	11.4938	1e-05	upregulated	5	1.78606	0.1676	upregulated	1	1.73273	0.1768
RNA polymerase II activating transcription factor binding	GO	4 out of 7	10.2178	downregulated	2	2.59914	0.0743	upregulated	1	0.346016	0.7075	downregulated	3	0.646701	0.5238	downregulated	3	2.78644	0.0616	upregulated	9	6.73583	0.0012	downregulated	2	2.2043	0.1103
dendritic spine maintenance	GO	3 out of 7	10.1617									downregulated	2	4.19654	0.015	downregulated	2	2.5958	0.0746	upregulated	4	5.05439	0.0064	downregulated	1	1.68505	0.1854
tube formation	GO	4 out of 7	10.159	downregulated	5	4.49052	0.0112	upregulated	5	2.48037	0.0837	downregulated	12	6.08384	0.0023	downregulated	5	0.564864	0.5684	upregulated	16	3.73478	0.0239	downregulated	10	2.23462	0.107
positive regulation of execution phase of apoptosis	GO	4 out of 7	10.1308									downregulated	3	3.96076	0.019	downregulated	1	1.11812	0.3269	upregulated	2	1.87022	0.1541	upregulated	1	3.18168	0.0415
response to cold	GO	3 out of 7	10.075	upregulated	1	2.45325	0.086					downregulated	3	1.21763	0.2959					upregulated	8	7.48502	0.0006	upregulated	3	3.82565	0.0218
regulation of execution phase of apoptosis	GO	4 out of 7	10.0398	upregulated	1	2.09151	0.1235					downregulated	5	4.5007	0.0111	downregulated	4	4.29227	0.0137	upregulated	2	0.711238	0.491	upregulated	1	2.62713	0.0723
positive regulation of fatty acid transport	GO	4 out of 7	10.0152									downregulated	1	3.11999	0.0442	downregulated	1	2.4485	0.0864	upregulated	1	1.16683	0.3114	upregulated	1	3.2799	0.0376
regulation of p38MAPK cascade	GO	5 out of 7	10.0075	downregulated	1	3.18558	0.0414	downregulated	1	0.817769	0.4414	downregulated	4	3.80507	0.0223	downregulated	1	0.7624	0.4665	upregulated	6	5.2271	0.0054	downregulated	5	3.79036	0.0226
regulation of stem cell population maintenance	GO	6 out of 7	9.93712	upregulated	2	0.855262	0.4252	downregulated	2	1.96189	0.1406	downregulated	4	1.20552	0.2995	downregulated	3	2.14127	0.1175	upregulated	3	2.61015	0.0735	upregulated	1	0.442756	0.6423	upregulated	1	2.43079	0.088
cellular response to decreased oxygen levels	GO	4 out of 7	9.93251	downregulated	9	9.12464	0.0001	upregulated	7	1.42841	0.2397	downregulated	12	1.7947	0.1662	downregulated	5	1.46299	0.2315	upregulated	22	6.98377	0.0009	downregulated	19	8.00518	0.0003
extracellular matrix structural constituent conferring tensile strength	GO	4 out of 7	9.8993					downregulated	1	1.72278	0.1786	downregulated	3	2.46395	0.0851					upregulated	5	3.95268	0.0192	upregulated	1	1.7599	0.1721
palmitoyltransferase complex	GO	2 out of 7	9.88838									downregulated	2	5.53668	0.0039	downregulated	3	7.17928	0.0008	downregulated	1	0.132599	0.8758	downregulated	2	2.69499	0.0675
erythrocyte development	GO	4 out of 7	9.87756	downregulated	1	2.90682	0.0546					downregulated	3	2.80585	0.0605	downregulated	2	3.13002	0.0437	upregulated	5	3.82397	0.0218	downregulated	4	2.78911	0.0615
positive regulation of cell cycle G1/S phase transition	GO	4 out of 7	9.86757	downregulated	1	0.47758	0.6203	downregulated	1	2.05118	0.1286	upregulated	1	1.05914	0.3468	upregulated	1	1.1376	0.3206	upregulated	5	3.9442	0.0194	upregulated	2	5.59134	0.0037
regulation of ventricular cardiac muscle cell action potential	GO	3 out of 7	9.81244					downregulated	1	4.775	0.0084	downregulated	3	3.92197	0.0198					upregulated	2	1.11546	0.3278
negative regulation of multicellular organism growth	GO	4 out of 7	9.78738	downregulated	1	3.62434	0.0267					downregulated	1	0.717273	0.4881					upregulated	3	1.91685	0.1471	upregulated	2	3.52891	0.0293
mitotic G2/M transition checkpoint	GO	3 out of 7	9.78351	upregulated	1	0.477588	0.6203	upregulated	2	1.12408	0.325	downregulated	5	5.61175	0.0037	downregulated	4	5.23711	0.0053	upregulated	2	0.53632	0.5849
epithelial cell proliferation	GO	4 out of 7	9.71619	upregulated	5	2.37148	0.0933	downregulated	1	0.745154	0.4747	downregulated	9	6.21153	0.002	downregulated	5	4.83988	0.0079	upregulated	9	2.96968	0.0513	downregulated	8	2.67857	0.0687
positive regulation of viral life cycle	GO	4 out of 7	9.70471	upregulated	2	0.265434	0.7669	upregulated	5	4.3092	0.0134	downregulated	3	1.4157	0.2428	downregulated	1	1.29834	0.273	upregulated	10	8.45153	0.0002	upregulated	2	3.11378	0.0444
regulation of transcription regulatory region DNA binding	GO	4 out of 7	9.70315	downregulated	1	0.806199	0.4466	upregulated	2	2.65005	0.0706	downregulated	3	3.50452	0.0301	downregulated	4	2.96549	0.0515	upregulated	9	5.35377	0.0047	downregulated	1	0.276791	0.7582
response to antineoplastic agent	GO	4 out of 7	9.66752	downregulated	2	4.69172	0.0092	upregulated	6	4.87229	0.0077	downregulated	8	2.70763	0.0667	downregulated	5	2.66368	0.0697	upregulated	15	7.94955	0.0004	upregulated	8	4.47678	0.0114
negative regulation of vasculature development	GO	4 out of 7	9.66452	downregulated	6	2.48814	0.0831	upregulated	4	3.03624	0.048	downregulated	6	2.59836	0.0744	downregulated	6	2.00466	0.1347	upregulated	19	8.42981	0.0002	downregulated	9	2.8202	0.0596
positive regulation of gene silencing by miRNA	GO	3 out of 7	9.65395	downregulated	1	0.807404	0.446					downregulated	4	1.90175	0.1493	downregulated	1	0.615894	0.5402	upregulated	6	8.06052	0.0003	downregulated	1	0.92422	0.3968
regulation of Notch signaling pathway	GO	5 out of 7	9.62297	downregulated	5	2.47952	0.0838	upregulated	2	1.56235	0.2096	downregulated	9	2.06252	0.1271	downregulated	3	0.916945	0.3997	upregulated	14	8.51433	0.0002	downregulated	11	4.55088	0.0106	upregulated	1	1.76289	0.1715
antioxidant activity	GO	4 out of 7	9.58249	downregulated	2	1.29228	0.2746	upregulated	4	2.29157	0.1011	downregulated	5	6.81861	0.0011	downregulated	3	3.60336	0.0272	upregulated	5	1.57713	0.2066	downregulated	3	1.41733	0.2424
gene silencing	GO	5 out of 7	9.57886	downregulated	1	0.0388932	0.9619	upregulated	6	1.37267	0.2534	downregulated	17	3.29058	0.0372	downregulated	12	5.07531	0.0062	upregulated	14	1.87703	0.153	upregulated	6	0.669723	0.5119
male sex determination	GO	4 out of 7	9.56967									downregulated	1	1.89556	0.1502	downregulated	1	1.75044	0.1737	upregulated	4	4.31503	0.0134	upregulated	1	1.60864	0.2002
regulation of chloride transport	GO	4 out of 7	9.53625	downregulated	1	1.62427	0.1971					downregulated	1	1.84747	0.1576	downregulated	1	2.38202	0.0924	downregulated	1	1.32557	0.2657	upregulated	1	5.00806	0.0067
myosin II complex	GO	3 out of 7	9.53561					downregulated	1	1.13362	0.3219	downregulated	5	6.13436	0.0022	downregulated	2	5.01702	0.0066	downregulated	3	0.543419	0.5808	downregulated	3	2.20598	0.1101
oxidoreductase activity, acting on paired donors, with incorporation or reduction of molecular oxygen, NAD(P)H as one donor, and incorporation of one atom of oxygen	GO	3 out of 7	9.46791	upregulated	1	0.514255	0.5979	downregulated	2	6.23956	0.002	downregulated	5	5.08079	0.0062	downregulated	3	4.64852	0.0096	downregulated	4	2.21122	0.1096	downregulated	3	3.77549	0.0229
vasculature development	GO	1 out of 7	9.46704	downregulated	17	2.65887	0.07	upregulated	16	2.719	0.0659	downregulated	49	14.7198	4e-07	downregulated	32	8.83812	0.0001	upregulated	85	40.6811	2.1e-18	upregulated	24	9.46704	7.7e-05	upregulated	2	0.978109	0.376
MHC class I protein complex	GO	2 out of 7	9.45445					upregulated	1	0.710201	0.4915	downregulated	2	1.76627	0.171	upregulated	1	3.53321	0.0292	upregulated	6	11.9316	6.6e-06
cell trailing edge	GO	3 out of 7	9.42335									downregulated	1	1.28972	0.2753	downregulated	2	2.7595	0.0633	upregulated	5	6.78475	0.0011	downregulated	1	1.41062	0.244
protein tyrosine kinase binding	GO	3 out of 7	9.33285	upregulated	1	0.42591	0.6532	upregulated	3	1.118	0.3269	downregulated	6	2.53993	0.0789	upregulated	1	1.91955	0.1467	upregulated	12	4.99193	0.0068	upregulated	3	5.26446	0.0052
mesenchymal cell development	GO	4 out of 7	9.277	downregulated	4	1.8744	0.1534	upregulated	2	3.72084	0.0242	downregulated	12	11.3768	1.1e-05	downregulated	3	0.992012	0.3708	upregulated	8	1.86972	0.1542	downregulated	8	3.11509	0.0444
endodermal cell differentiation	GO	3 out of 7	9.22276	upregulated	1	1.58513	0.2049					downregulated	1	2.09144	0.1235	downregulated	2	3.8008	0.0224	upregulated	8	4.91564	0.0073
lipoprotein particle binding	GO	4 out of 7	9.182					downregulated	1	0.78323	0.4569	upregulated	1	4.48965	0.0112	downregulated	3	3.00497	0.0495	upregulated	5	7.19852	0.0007	upregulated	1	2.68492	0.0682
negative regulation of cell adhesion	GO	2 out of 7	9.17413	upregulated	10	1.81926	0.1621	upregulated	10	0.967878	0.3799	downregulated	28	11.3657	1.2e-05	downregulated	12	4.54777	0.0106	upregulated	50	17.0842	3.8e-08	downregulated	18	3.9522	0.0192
digestive tract morphogenesis	GO	5 out of 7	9.13973	downregulated	3	1.82866	0.1606	downregulated	1	1.26483	0.2823	downregulated	2	0.992382	0.3707	downregulated	1	0.228304	0.7959	upregulated	8	5.39481	0.0045	downregulated	1	0.569255	0.5659
salivary gland morphogenesis	GO	4 out of 7	9.13589	downregulated	2	1.66368	0.1894	downregulated	2	3.83779	0.0215	downregulated	4	3.69972	0.0247	downregulated	2	0.692785	0.5002	upregulated	8	7.37669	0.0006	downregulated	1	0.758088	0.4686
collagen binding	GO	1 out of 7	9.12863	upregulated	2	0.657321	0.5182	upregulated	1	2.91342	0.0543	downregulated	6	3.85737	0.0211	downregulated	8	8.70292	0.0002	upregulated	15	13.2412	1.8e-06	upregulated	5	9.12863	0.0001
response to gravity	GO	3 out of 7	9.12077									downregulated	1	1.9445	0.1431	downregulated	1	2.85317	0.0577	upregulated	2	7.3037	0.0007	downregulated	2	2.9806	0.0508
positive regulation of viral process	GO	4 out of 7	9.1167	upregulated	3	0.241044	0.7858	upregulated	6	3.44307	0.032	downregulated	6	2.10204	0.1222	downregulated	3	0.991549	0.371	upregulated	14	7.24357	0.0007	upregulated	3	2.46366	0.0851
viral life cycle	GO	3 out of 7	9.09709	upregulated	7	1.50499	0.222	upregulated	9	2.94383	0.0527	downregulated	13	5.09572	0.0061	downregulated	11	5.91476	0.0027	upregulated	16	5.37922	0.0046	downregulated	8	2.84379	0.0582
establishment or maintenance of cell polarity	GO	4 out of 7	9.06388	upregulated	7	1.95547	0.1415	downregulated	4	2.31466	0.0988	downregulated	26	12.4091	4.1e-06	downregulated	14	5.39172	0.0046	upregulated	25	15.934	1.2e-07	downregulated	27	13.7295	1.1e-06	upregulated	2	4.63338	0.0097
positive regulation of chromosome separation	GO	2 out of 7	9.02062									downregulated	3	5.11383	0.006	downregulated	3	4.33083	0.0132	downregulated	1	0.424036	0.6544
positive regulation of cell cycle phase transition	GO	4 out of 7	8.95797	upregulated	2	0.211873	0.8091	upregulated	3	1.1051	0.3312	downregulated	5	1.02865	0.3575	downregulated	3	1.22445	0.2939	upregulated	8	3.21539	0.0401	upregulated	2	4.80646	0.0082
extracellular matrix structural constituent conferring compression resistance	GO	3 out of 7	8.95013	upregulated	1	1.11421	0.3282					downregulated	1	0.484572	0.616					upregulated	4	5.84958	0.0029	upregulated	1	3.73019	0.024
response to thyroid hormone	GO	3 out of 7	8.95005					upregulated	2	2.17096	0.1141	upregulated	2	3.18665	0.0413	downregulated	3	4.45979	0.0116	upregulated	5	5.75008	0.0032	upregulated	3	4.09779	0.0166
pre-mRNA binding	GO	3 out of 7	8.94106	upregulated	2	1.17907	0.3076	downregulated	1	3.67269	0.0254	downregulated	6	3.69972	0.0247	downregulated	2	2.74772	0.0641	downregulated	5	2.17413	0.1137	downregulated	5	3.96515	0.019
regulation of autophagosome maturation	GO	3 out of 7	8.91893													downregulated	1	1.22357	0.2942	upregulated	3	4.28307	0.0138	upregulated	2	3.4123	0.033
peptidase activator activity	GO	4 out of 7	8.87493	downregulated	2	1.35176	0.2588	upregulated	4	2.40964	0.0898	upregulated	2	2.93951	0.0529	downregulated	6	5.14518	0.0058	upregulated	8	6.06013	0.0023	upregulated	2	1.66701	0.1888
regulation of protein import	GO	5 out of 7	8.86464	upregulated	4	1.78393	0.168	upregulated	2	1.10517	0.3312	downregulated	3	0.991603	0.371	downregulated	3	1.10745	0.3304	upregulated	10	4.97119	0.0069	upregulated	2	2.80622	0.0604	upregulated	1	1.87728	0.153
aorta morphogenesis	GO	4 out of 7	8.77476	downregulated	2	1.64928	0.1922	upregulated	1	2.14815	0.1167	downregulated	2	1.1181	0.3269	downregulated	1	0.859694	0.4233	upregulated	7	7.29583	0.0007
protein import	GO	3 out of 7	8.74801	upregulated	6	0.44144	0.6431	upregulated	8	2.32477	0.0978	downregulated	6	1.51084	0.2207	downregulated	7	5.16687	0.0057	upregulated	17	9.01094	0.0001	downregulated	15	4.17443	0.0154
negative regulation of anoikis	GO	4 out of 7	8.73922	downregulated	2	2.15066	0.1164	upregulated	2	3.5783	0.0279	upregulated	2	1.91299	0.1476	downregulated	1	0.522829	0.5928	upregulated	4	6.65244	0.0013	downregulated	1	0.828355	0.4368	upregulated	1	5.73294	0.0032
multicellular organismal homeostasis	GO	4 out of 7	8.71914	upregulated	11	2.87607	0.0564	upregulated	10	4.35325	0.0129	downregulated	18	4.97685	0.0069	downregulated	12	5.55289	0.0039	upregulated	37	10.1713	3.8e-05	downregulated	26	5.44189	0.0043	upregulated	1	0.689352	0.5019
embryonic cranial skeleton morphogenesis	GO	4 out of 7	8.68791	upregulated	1	2.87459	0.0564					downregulated	8	4.53862	0.0107	downregulated	2	1.33025	0.2644	upregulated	7	2.13041	0.1188	upregulated	2	3.56323	0.0283
purinergic nucleotide receptor signaling pathway	GO	5 out of 7	8.68166	downregulated	1	4.92206	0.0073	upregulated	2	9.58348	6.9e-05	downregulated	2	3.01104	0.0492	downregulated	3	7.7877	0.0004	upregulated	1	1.47934	0.2278	upregulated	1	1.06501	0.3447
estrous cycle	GO	3 out of 7	8.66544	upregulated	1	1.28865	0.2756	upregulated	2	4.79189	0.0083	downregulated	1	3.05205	0.0473					upregulated	2	5.07889	0.0062	upregulated	2	6.61504	0.0013
establishment of endothelial intestinal barrier	GO	3 out of 7	8.64788					upregulated	2	1.68611	0.1852					downregulated	1	2.16044	0.1153	upregulated	3	3.54699	0.0288	upregulated	1	4.62656	0.0098
regulation of cellular response to heat	GO	4 out of 7	8.53974	upregulated	5	6.49103	0.0015	upregulated	1	0.630979	0.5321	downregulated	3	2.41414	0.0894	downregulated	3	3.68687	0.0251	upregulated	5	6.29928	0.0018	upregulated	2	3.26146	0.0383
fat cell differentiation	GO	4 out of 7	8.49823	upregulated	5	1.72042	0.179	downregulated	2	0.625455	0.535	downregulated	7	2.69877	0.0673	downregulated	4	2.17376	0.1137	upregulated	17	10.8085	2e-05	downregulated	13	6.08779	0.0023
sequestering of metal ion	GO	1 out of 7	8.48542									downregulated	2	8.48542	0.0002
ATP hydrolysis coupled anion transmembrane transport	GO	4 out of 7	8.45409	downregulated	1	2.52805	0.0798	downregulated	1	2.68878	0.068	downregulated	1	1.35801	0.2572					upregulated	2	3.07577	0.0462	upregulated	1	1.49227	0.2249
negative regulation of DNA-dependent DNA replication	GO	3 out of 7	8.40282	upregulated	1	0.707733	0.4928	upregulated	1	0.578658	0.5606	downregulated	3	3.43885	0.0321	downregulated	2	2.49383	0.0826	upregulated	4	4.10013	0.0166	downregulated	1	0.343595	0.7092
segmentation	GO	4 out of 7	8.39059	downregulated	3	1.86362	0.1551	downregulated	2	0.8979	0.4074	downregulated	10	5.71832	0.0033	downregulated	6	2.96524	0.0515	downregulated	10	1.90505	0.1488	upregulated	3	0.714178	0.4896
regulation of myoblast proliferation	GO	4 out of 7	8.36459					downregulated	1	2.75485	0.0636	downregulated	1	2.16113	0.1152	downregulated	1	2.40584	0.0902	upregulated	2	1.04277	0.3525
developmental growth	GO	3 out of 7	8.34941	downregulated	13	2.11098	0.1211	upregulated	8	3.37029	0.0344	upregulated	15	6.06004	0.0023	upregulated	6	4.34663	0.013	upregulated	64	28.0805	6.4e-13	downregulated	37	9.45229	7.9e-05	upregulated	2	1.38717	0.2498
integrin binding	GO	1 out of 7	8.26406	downregulated	1	0.368309	0.6919	upregulated	2	1.36247	0.256	downregulated	14	7.08954	0.0008	downregulated	11	7.14474	0.0008	upregulated	30	23.889	4.2e-11	upregulated	9	8.26406	0.0003
determination of adult lifespan	GO	2 out of 7	8.26366									downregulated	4	7.47737	0.0006	downregulated	1	1.56132	0.2099	upregulated	1	1.13253	0.3222	downregulated	1	0.775029	0.4607
regulation of carbohydrate metabolic process by regulation of transcription from RNA polymerase II promoter	GO	2 out of 7	8.23804									downregulated	1	1.48886	0.2256					upregulated	4	6.74918	0.0012
activin binding	GO	4 out of 7	8.23309	upregulated	4	4.57594	0.0103					downregulated	2	2.19094	0.1118	downregulated	2	2.45145	0.0862	upregulated	4	6.34402	0.0018	downregulated	2	1.62542	0.1968	upregulated	1	3.44805	0.0318
CD8-positive, alpha-beta T cell activation	GO	3 out of 7	8.20276	upregulated	1	1.68806	0.1849					downregulated	2	2.89689	0.0552	downregulated	2	5.8698	0.0028	upregulated	2	4.95148	0.0071	downregulated	1	3.82734	0.0218
negative regulation of viral life cycle	GO	5 out of 7	8.1773	downregulated	3	1.31669	0.268	upregulated	7	7.69273	0.0005	downregulated	2	0.541584	0.5818					upregulated	14	10.131	4e-05	upregulated	4	2.00343	0.1349	upregulated	1	1.87728	0.153
positive regulation of myoblast fusion	GO	3 out of 7	8.1771					upregulated	1	0.743832	0.4753	downregulated	1	1.92744	0.1455	downregulated	1	3.01385	0.0491	upregulated	4	5.14661	0.0058	downregulated	1	1.16697	0.3113
negative regulation of cell cycle G2/M phase transition	GO	3 out of 7	8.17085	upregulated	3	0.388194	0.6783	upregulated	4	1.49962	0.2232	downregulated	7	5.41907	0.0044	downregulated	6	4.58284	0.0102	upregulated	6	0.594648	0.5518	downregulated	3	0.537891	0.584
cellular oxidant detoxification	GO	4 out of 7	8.16395	downregulated	2	1.12673	0.3241	upregulated	5	3.02268	0.0487	downregulated	5	6.49069	0.0015	downregulated	3	3.4911	0.0305	upregulated	6	1.41081	0.2439	downregulated	4	1.33269	0.2638
craniofacial suture morphogenesis	GO	4 out of 7	8.13879									downregulated	1	0.805564	0.4468	downregulated	1	0.819797	0.4405	upregulated	4	3.3044	0.0367					upregulated	1	3.20903	0.0404
cytokinetic process	GO	3 out of 7	8.13737	downregulated	1	1.65786	0.1905					downregulated	3	4.50042	0.0111	downregulated	2	2.74514	0.0642	downregulated	1	0.136257	0.8726	downregulated	1	0.629793	0.5327
response to osmotic stress	GO	2 out of 7	8.13251	upregulated	3	1.29216	0.2747	upregulated	1	2.24803	0.1056	downregulated	7	6.57263	0.0014	downregulated	10	8.819	0.0001	upregulated	10	5.93921	0.0026	downregulated	8	3.71894	0.0243
RNA polymerase II core promoter sequence-specific DNA binding	GO	2 out of 7	8.12023					upregulated	1	0.838384	0.4324	downregulated	1	1.64113	0.1938	downregulated	3	3.52794	0.0294	upregulated	4	6.42608	0.0016	downregulated	2	0.995412	0.3696
regulation of ERBB signaling pathway	GO	4 out of 7	8.08191	downregulated	4	3.23724	0.0393	downregulated	2	3.05541	0.0471	downregulated	10	7.22735	0.0007	downregulated	6	2.3122	0.099	downregulated	16	4.8727	0.0077	downregulated	8	2.87759	0.0563
oxidoreductase activity, acting on paired donors, with incorporation or reduction of molecular oxygen	GO	5 out of 7	8.08024	downregulated	4	1.48768	0.2259	downregulated	3	3.28989	0.0373	downregulated	9	1.41049	0.244	downregulated	8	2.72274	0.0657	upregulated	14	1.43051	0.2392	downregulated	11	2.26106	0.1042
positive regulation of cell size	GO	2 out of 7	8.07422					upregulated	1	1.40701	0.2449	upregulated	1	1.35327	0.2584					upregulated	2	2.66222	0.0698	upregulated	3	8.17229	0.0003
reactive nitrogen species metabolic process	GO	3 out of 7	8.06743									upregulated	2	3.21241	0.0403	downregulated	1	3.44137	0.032	upregulated	4	5.67178	0.0034	upregulated	2	2.16669	0.1146
cellular response to interleukin-7	GO	4 out of 7	8.06176	upregulated	2	2.81426	0.0599					downregulated	3	2.16864	0.1143	downregulated	1	1.95291	0.1419	upregulated	2	2.2962	0.1006	upregulated	2	1.644	0.1932
negative regulation of ATP biosynthetic process	GO	4 out of 7	8.05487	downregulated	1	1.2918	0.2748	downregulated	1	5.68899	0.0034	downregulated	1	0.771439	0.4623					upregulated	3	4.5065	0.011	downregulated	2	4.20387	0.0149
heme binding	GO	3 out of 7	8.04231	downregulated	5	3.09214	0.0454	upregulated	4	1.53565	0.2153	downregulated	9	4.98258	0.0069	downregulated	5	3.90902	0.0201	downregulated	15	1.29212	0.2747	downregulated	6	1.11366	0.3284
cytolysis	GO	4 out of 7	7.97096									downregulated	2	2.84847	0.0579	downregulated	1	2.2474	0.1057	upregulated	1	0.121838	0.8853	upregulated	3	2.75325	0.0637
tetrapyrrole binding	GO	3 out of 7	7.95419	downregulated	5	2.9146	0.0542	upregulated	4	1.49065	0.2252	downregulated	9	4.83863	0.0079	downregulated	6	3.71516	0.0244	downregulated	16	1.04321	0.3523	downregulated	6	0.980342	0.3752
negative regulation of angiogenesis	GO	4 out of 7	7.92716	downregulated	5	2.11086	0.1211	upregulated	4	3.2977	0.037	downregulated	5	3.16102	0.0424	downregulated	5	2.14083	0.1176	upregulated	16	6.75127	0.0012	downregulated	9	2.93912	0.0529
axis specification	GO	6 out of 7	7.91755	upregulated	5	2.10984	0.1213	downregulated	1	0.960665	0.3826	downregulated	5	1.94233	0.1434	downregulated	1	0.188716	0.828	upregulated	7	2.47304	0.0843	upregulated	3	1.64312	0.1934	upregulated	1	2.81953	0.0596
stem cell development	GO	3 out of 7	7.87255	upregulated	5	1.71834	0.1794	upregulated	3	3.64252	0.0262	downregulated	12	10.954	1.7e-05	downregulated	3	0.925866	0.3962	upregulated	9	4.52913	0.0108	downregulated	8	3.17558	0.0418
blastoderm segmentation	GO	4 out of 7	7.85955	downregulated	2	2.87471	0.0564					downregulated	2	2.94345	0.0527	downregulated	1	0.938826	0.3911	downregulated	2	0.724492	0.4846	upregulated	1	1.10257	0.332
beta-catenin binding	GO	4 out of 7	7.84176	downregulated	4	1.63952	0.1941	upregulated	2	1.57776	0.2064	downregulated	8	4.41783	0.0121	downregulated	3	2.26802	0.1035	upregulated	17	11.5848	9.3e-06	downregulated	6	2.09632	0.1229	upregulated	1	3.19048	0.0412
negative regulation of extrinsic apoptotic signaling pathway	GO	3 out of 7	7.83526	upregulated	3	1.88	0.1526	upregulated	7	7.32468	0.0007	upregulated	4	2.06219	0.1272	downregulated	7	2.18776	0.1122	upregulated	23	18.0269	1.5e-08	downregulated	9	2.52317	0.0802	upregulated	1	1.41065	0.244
cysteine-type endopeptidase activator activity involved in apoptotic process	GO	4 out of 7	7.82359	downregulated	2	2.81129	0.0601					upregulated	2	3.83158	0.0217	downregulated	2	2.40612	0.0902	upregulated	4	5.2413	0.0053	upregulated	1	1.19646	0.3023
oocyte development	GO	6 out of 7	7.77545	downregulated	1	0.640648	0.527	downregulated	1	0.884866	0.4128	downregulated	3	1.65798	0.1905	downregulated	2	1.28974	0.2753	upregulated	4	1.12693	0.324	upregulated	3	2.17528	0.1136
extracellular matrix structural constituent	GO	1 out of 7	7.77493	upregulated	5	2.41987	0.0889	upregulated	2	0.485971	0.6151	downregulated	9	0.761768	0.4668	downregulated	4	0.414534	0.6606	upregulated	30	19.6987	2.8e-09	upregulated	6	7.77493	0.0004
peptidase inhibitor activity	GO	2 out of 7	7.75154	downregulated	5	2.50145	0.082	upregulated	4	2.39254	0.0914	upregulated	3	1.17768	0.308	upregulated	2	2.25722	0.1046	upregulated	22	11.3046	1.2e-05	downregulated	3	2.48431	0.0834
mitotic spindle midzone	GO	3 out of 7	7.73989	upregulated	1	1.18687	0.3052					downregulated	4	4.66393	0.0094	downregulated	2	2.28216	0.1021	downregulated	2	0.755324	0.4699	upregulated	1	2.736	0.0648
exopeptidase activity	GO	3 out of 7	7.73646	upregulated	2	1.00849	0.3648	upregulated	5	1.10796	0.3302	downregulated	9	3.55764	0.0285	downregulated	8	5.81893	0.003	downregulated	17	2.64031	0.0713	upregulated	4	3.11664	0.0443
regulation of cell fate specification	GO	3 out of 7	7.70009	downregulated	1	1.93909	0.1438	downregulated	1	2.16772	0.1144									upregulated	4	6.08287	0.0023	downregulated	1	2.48958	0.0829
establishment or maintenance of monopolar cell polarity	GO	4 out of 7	7.59571	downregulated	1	1.05968	0.3466	downregulated	1	4.6227	0.0098	downregulated	1	0.364645	0.6944					upregulated	4	5.34968	0.0047	downregulated	4	3.80099	0.0223
positive regulation of telomere maintenance via telomere lengthening	GO	4 out of 7	7.52696	upregulated	3	2.69971	0.0672	downregulated	1	3.68984	0.025	downregulated	3	3.52343	0.0295	downregulated	3	4.16066	0.0156	downregulated	10	3.45913	0.0315	upregulated	3	2.31187	0.0991
cohesin complex	GO	3 out of 7	7.51028	downregulated	1	2.26365	0.104	downregulated	1	2.11974	0.1201									upregulated	3	3.12688	0.0439
NADP binding	GO	3 out of 7	7.50478	downregulated	2	1.66225	0.1897	upregulated	3	2.43311	0.0878	downregulated	9	7.21059	0.0007	downregulated	7	8.94281	0.0001	downregulated	11	4.82135	0.0081	downregulated	6	3.0564	0.0471
interleukin-2-mediated signaling pathway	GO	3 out of 7	7.48116									downregulated	1	2.27308	0.103	downregulated	1	3.76622	0.0231	downregulated	1	1.28486	0.2767	upregulated	2	2.72672	0.0654
nuclear transport	GO	4 out of 7	7.4759	downregulated	4	0.213085	0.8081	upregulated	17	4.05466	0.0173	upregulated	9	1.43374	0.2384	downregulated	16	3.97898	0.0187	upregulated	26	6.47284	0.0015	upregulated	8	2.29939	0.1003
GABAergic neuron differentiation	GO	2 out of 7	7.46631									downregulated	1	4.2402	0.0144	downregulated	1	3.22611	0.0397	upregulated	1	1.85594	0.1563
low-density lipoprotein particle binding	GO	3 out of 7	7.44675									upregulated	1	5.04715	0.0064	downregulated	2	3.55407	0.0286	upregulated	4	5.7195	0.0033	upregulated	1	3.22033	0.0399
regulation of telomere maintenance via telomere lengthening	GO	4 out of 7	7.42486	upregulated	5	3.01877	0.0489	downregulated	1	3.15746	0.0425	downregulated	4	2.33061	0.0972	downregulated	4	3.43741	0.0321	downregulated	11	1.37919	0.2518	upregulated	5	2.89735	0.0552
regulation of store-operated calcium entry	GO	4 out of 7	7.42062	downregulated	1	3.44466	0.0319	upregulated	1	1.1751	0.3088	downregulated	1	2.45583	0.0858	downregulated	1	3.19596	0.0409	upregulated	1	2.44803	0.0865	downregulated	1	2.94876	0.0524
negative regulation of mitotic sister chromatid separation	GO	3 out of 7	7.37121	upregulated	2	3.13284	0.0436					downregulated	3	3.17808	0.0417	downregulated	4	6.27422	0.0019	upregulated	4	1.35872	0.257	downregulated	1	0.30697	0.7357
mitotic spindle pole	GO	3 out of 7	7.35107	downregulated	2	3.75641	0.0234	upregulated	2	1.49323	0.2246	downregulated	4	1.75824	0.1723	downregulated	4	3.61743	0.0269	upregulated	1	0.399291	0.6708	downregulated	1	0.28777	0.7499
disordered domain specific binding	GO	3 out of 7	7.34866					upregulated	1	0.237608	0.7885	downregulated	6	2.40516	0.0903	downregulated	5	3.76652	0.0231	upregulated	5	5.70572	0.0033	downregulated	5	4.29113	0.0137
regulation of female gonad development	GO	3 out of 7	7.31266									downregulated	1	2.11974	0.1201	downregulated	1	2.02506	0.132	upregulated	3	3.16785	0.0421
genitalia development	GO	4 out of 7	7.31115	downregulated	2	1.66949	0.1883	downregulated	1	1.11236	0.3288	downregulated	3	4.07411	0.017					upregulated	6	2.12737	0.1191	downregulated	4	1.67218	0.1878
glycosaminoglycan binding	GO	2 out of 7	7.2767	downregulated	4	1.62252	0.1974	upregulated	8	2.60084	0.0742	downregulated	11	1.77883	0.1688	downregulated	7	5.56597	0.0038	upregulated	32	21.9041	3.1e-10	upregulated	11	6.13562	0.0022	upregulated	1	1.14108	0.3195
hepatocyte apoptotic process	GO	4 out of 7	7.23897					upregulated	1	1.07838	0.3401	downregulated	3	2.93777	0.053	downregulated	2	3.01097	0.0492	upregulated	2	1.14761	0.3174	upregulated	1	1.22101	0.2949
endocrine system development	GO	3 out of 7	7.23082	upregulated	4	1.23291	0.2914	downregulated	1	1.6224	0.1974	upregulated	3	1.77316	0.1698	upregulated	2	1.28402	0.2769	upregulated	15	5.43987	0.0043	upregulated	1	4.45864	0.0116
mononuclear cell proliferation	GO	3 out of 7	7.20108	upregulated	2	2.57351	0.0763	upregulated	2	0.293804	0.7454	downregulated	4	3.87977	0.0207	downregulated	4	4.37785	0.0126	upregulated	12	4.99193	0.0068	downregulated	5	3.18116	0.0415
transcriptional repressor activity, RNA polymerase II transcription factor binding	GO	2 out of 7	7.15357					upregulated	2	4.6648	0.0094	upregulated	1	2.00977	0.134	downregulated	2	3.46723	0.0312	upregulated	7	11.6915	8.4e-06	downregulated	1	1.33063	0.2643
regulation of multicellular organism growth	GO	3 out of 7	7.14919	downregulated	4	2.20699	0.11	downregulated	1	0.399332	0.6708	upregulated	3	1.04486	0.3517					upregulated	13	7.5105	0.0005	downregulated	5	1.92277	0.1462
cellular defense response	GO	4 out of 7	7.1047	upregulated	1	0.186259	0.8301	upregulated	1	3.06764	0.0465	downregulated	6	2.38968	0.0917	downregulated	4	3.86824	0.0209	upregulated	8	3.50916	0.0299	upregulated	3	1.78219	0.1683	upregulated	1	2.31849	0.0984
regulation of T cell migration	GO	3 out of 7	7.08594									downregulated	4	2.1453	0.117	downregulated	3	3.74649	0.0236	downregulated	3	0.505596	0.6031	upregulated	1	1.69974	0.1827
positive regulation of cold-induced thermogenesis	GO	4 out of 7	7.05118	downregulated	1	2.28362	0.1019	upregulated	5	3.32606	0.0359	upregulated	5	3.22706	0.0397	downregulated	2	1.68723	0.185	upregulated	15	7.56927	0.0005	downregulated	9	2.65576	0.0702	upregulated	1	4.71994	0.0089
regulation of mitotic spindle assembly	GO	5 out of 7	7.01959	upregulated	3	2.18253	0.1128	downregulated	1	1.677	0.1869	downregulated	2	0.968626	0.3796	downregulated	1	0.629671	0.5328	upregulated	4	3.62405	0.0267	upregulated	1	2.30277	0.1
response to hepatocyte growth factor	GO	4 out of 7	7.01108	downregulated	1	2.28877	0.1014	upregulated	1	2.15853	0.1155	downregulated	4	5.69823	0.0034	downregulated	1	1.50711	0.2215	upregulated	2	0.542833	0.5811	downregulated	1	0.867328	0.4201
phosphatidylinositol-3-phosphate biosynthetic process	GO	4 out of 7	6.96429	upregulated	5	3.07926	0.046	downregulated	2	1.11472	0.328	downregulated	5	7.00247	0.0009	downregulated	3	2.8788	0.0562	upregulated	8	2.7766	0.0622	downregulated	6	3.72904	0.024
cellular detoxification	GO	4 out of 7	6.87708	downregulated	2	1.04714	0.3509	upregulated	6	4.03915	0.0176	downregulated	5	6.36993	0.0017	downregulated	3	3.44958	0.0318	upregulated	7	1.35096	0.259	downregulated	4	1.30137	0.2722
cell-cell recognition	GO	5 out of 7	6.87303	downregulated	3	2.00187	0.1351	upregulated	1	1.76453	0.1713	downregulated	3	2.64535	0.071	downregulated	1	2.72111	0.0658	upregulated	3	0.348355	0.7058	downregulated	5	1.2796	0.2781	upregulated	1	2.20047	0.1108
embryonic digestive tract development	GO	3 out of 7	6.87202	downregulated	2	1.54239	0.2139					downregulated	3	2.41082	0.0897	upregulated	1	2.33247	0.0971	upregulated	6	5.25129	0.0052
phospholipase inhibitor activity	GO	1 out of 7	6.84215	upregulated	1	1.638	0.1944													upregulated	6	12.5024	3.7e-06	upregulated	2	6.84215	0.0011
regulation of developmental pigmentation	GO	3 out of 7	6.8409	downregulated	2	2.36135	0.0943					downregulated	2	2.36935	0.0935					upregulated	2	2.11021	0.1212
mediator complex	GO	3 out of 7	6.80846	upregulated	1	0.254801	0.7751	upregulated	2	2.16369	0.1149	downregulated	5	3.91221	0.02	downregulated	3	2.5817	0.0756	upregulated	5	2.61914	0.0729	downregulated	4	2.04979	0.1288
heat shock protein binding	GO	2 out of 7	6.80529	downregulated	2	2.34012	0.0963	upregulated	3	2.23743	0.1067	downregulated	8	3.83648	0.0216	upregulated	1	3.42617	0.0325	upregulated	12	7.97457	0.0003	downregulated	11	2.76833	0.0628
response to platelet-derived growth factor	GO	2 out of 7	6.70339					upregulated	1	1.64601	0.1928	upregulated	1	2.9378	0.053	downregulated	2	1.92671	0.1456	upregulated	9	10.113	4.1e-05	downregulated	1	0.752482	0.4712
regulation of miRNA metabolic process	GO	3 out of 7	6.69141					upregulated	1	2.18494	0.1125	downregulated	4	5.26006	0.0052	downregulated	2	2.91168	0.0544	upregulated	1	0.704604	0.4943
nuclear matrix	GO	3 out of 7	6.6789	upregulated	9	1.91591	0.1472	upregulated	5	0.704047	0.4946	downregulated	11	1.60731	0.2004	downregulated	9	6.61785	0.0013	upregulated	13	5.07854	0.0062	downregulated	10	4.00485	0.0182
positive regulation of transcription from RNA polymerase II promoter in response to stress	GO	3 out of 7	6.65381	downregulated	3	6.7554	0.0012	upregulated	2	1.53149	0.2162	downregulated	3	2.02717	0.1317	downregulated	3	2.87279	0.0565	upregulated	3	0.814463	0.4429	downregulated	1	2.25736	0.1046
chemokine binding	GO	4 out of 7	6.64234	downregulated	1	1.50998	0.2209	upregulated	1	3.5665	0.0283	downregulated	2	0.966245	0.3805					upregulated	7	7.27102	0.0007	upregulated	1	0.461603	0.6303
phosphatidylinositol bisphosphate binding	GO	5 out of 7	6.62968	downregulated	3	1.10333	0.3318	upregulated	1	2.20788	0.1099	downregulated	9	3.9811	0.0187	downregulated	5	5.73784	0.0032	upregulated	13	4.4098	0.0122	downregulated	14	9.55961	7.1e-05	upregulated	1	3.1651	0.0422
establishment of spindle orientation	GO	2 out of 7	6.6153	upregulated	1	2.5402	0.0789	upregulated	1	0.694333	0.4994	downregulated	6	6.54457	0.0014	downregulated	4	5.12262	0.006	downregulated	6	3.32444	0.036	downregulated	2	1.03312	0.3559
cellular biogenic amine metabolic process	GO	2 out of 7	6.60667	downregulated	3	4.83697	0.0079	upregulated	2	0.630243	0.5325	upregulated	4	4.48458	0.0113	downregulated	3	2.74959	0.064	upregulated	5	2.45179	0.0861	downregulated	1	0.349657	0.7049
negative regulation of reactive oxygen species biosynthetic process	GO	5 out of 7	6.5837	downregulated	2	2.40966	0.0898	upregulated	2	2.96104	0.0518	downregulated	2	1.27522	0.2794	downregulated	1	0.55688	0.573	upregulated	5	3.90707	0.0201	upregulated	1	1.39591	0.2476
positive regulation of oxidative stress-induced cell death	GO	3 out of 7	6.52511	downregulated	2	2.97084	0.0513	upregulated	1	3.90022	0.0202	downregulated	1	0.217841	0.8043					upregulated	5	7.23664	0.0007
negative regulation of extrinsic apoptotic signaling pathway via death domain receptors	GO	4 out of 7	6.46926					upregulated	2	5.3726	0.0046	downregulated	3	1.58553	0.2048	downregulated	2	1.73412	0.1766	upregulated	7	7.19728	0.0007	upregulated	2	1.32494	0.2658
oxidoreductase activity, acting on the CH-NH2 group of donors, oxygen as acceptor	GO	2 out of 7	6.45947																	upregulated	2	2.83182	0.0589	upregulated	2	3.62765	0.0266
regulation of lymphocyte migration	GO	3 out of 7	6.44197									downregulated	5	2.04879	0.1289	downregulated	3	3.09677	0.0452	downregulated	7	2.0913	0.1235	upregulated	3	3.38771	0.0338
modulation by host of viral process	GO	2 out of 7	6.43454					upregulated	3	4.86632	0.0077									upregulated	5	7.11095	0.0008	upregulated	2	4.18991	0.0151
ear morphogenesis	GO	3 out of 7	6.38408	upregulated	4	1.6927	0.184	downregulated	2	1.32779	0.2651	upregulated	6	2.29647	0.1006					upregulated	14	3.80207	0.0223	upregulated	4	3.55068	0.0287
carbohydrate transport	GO	3 out of 7	6.36805	upregulated	3	1.61964	0.198	downregulated	2	1.63165	0.1956	downregulated	3	3.01104	0.0492	downregulated	4	5.26983	0.0051	downregulated	15	4.47144	0.0114	downregulated	4	1.92483	0.1459
positive regulation of double-strand break repair	GO	3 out of 7	6.30672	upregulated	1	1.35966	0.2567	upregulated	1	0.69954	0.4968	downregulated	3	1.85525	0.1564	downregulated	3	3.9578	0.0191	upregulated	4	2.55286	0.0779
female sex differentiation	GO	4 out of 7	6.2439	downregulated	5	2.27889	0.1024	upregulated	2	1.45551	0.2333	downregulated	6	3.23075	0.0395	downregulated	4	1.32629	0.2655	upregulated	16	4.07665	0.017	downregulated	8	3.21317	0.0402
oxygen binding	GO	2 out of 7	6.23713	downregulated	2	2.31158	0.0991					downregulated	1	4.68171	0.0093					downregulated	5	0.512032	0.5993	downregulated	1	0.244122	0.7834
positive regulation of protein serine/threonine kinase activity	GO	3 out of 7	6.2224	downregulated	5	2.88677	0.0558	upregulated	8	1.26202	0.2831	downregulated	20	7.78524	0.0004	downregulated	20	6.34994	0.0017	upregulated	51	15.6644	1.6e-07	downregulated	39	10.7995	2e-05
positive regulation of neural precursor cell proliferation	GO	3 out of 7	6.21953	upregulated	2	3.47942	0.0308	upregulated	2	3.13946	0.0433	downregulated	2	3.96502	0.019	upregulated	1	1.48037	0.2276	upregulated	10	8.27218	0.0003	upregulated	1	2.08158	0.1247
specific granule lumen	GO	3 out of 7	6.18171	upregulated	3	1.69494	0.1836	upregulated	1	0.744801	0.4748	downregulated	4	2.05395	0.1282	downregulated	4	4.34455	0.013	upregulated	6	4.50485	0.0111	downregulated	5	2.28189	0.1021
TRIF-dependent toll-like receptor signaling pathway	GO	4 out of 7	6.18056					upregulated	3	7.6212	0.0005	downregulated	2	1.63946	0.1941	downregulated	2	2.36467	0.094	upregulated	8	9.05419	0.0001	upregulated	1	0.743432	0.4755
regulation of extrinsic apoptotic signaling pathway via death domain receptors	GO	3 out of 7	6.16181	upregulated	1	0.0162081	0.9839	upregulated	2	4.90364	0.0074	downregulated	4	1.18886	0.3046	upregulated	1	1.98648	0.1372	upregulated	13	9.23139	9.8e-05	upregulated	4	2.6479	0.0708
protein binding, bridging	GO	3 out of 7	6.14413	downregulated	6	1.20744	0.299	upregulated	8	4.57618	0.0103	downregulated	11	2.35022	0.0953	upregulated	2	1.30043	0.2724	downregulated	28	5.11244	0.006	upregulated	6	8.46308	0.0002
peptidoglycan binding	GO	2 out of 7	6.09333													downregulated	1	3.99132	0.0185	upregulated	2	3.19828	0.0408	downregulated	1	1.09627	0.3341
renal filtration	GO	3 out of 7	6.07864									downregulated	2	2.4717	0.0844	downregulated	1	1.92986	0.1452	upregulated	2	1.67708	0.1869
quinone metabolic process	GO	3 out of 7	6.0524	upregulated	1	0.802111	0.4484	upregulated	1	1.4754	0.2287	downregulated	3	1.35811	0.2571	downregulated	4	6.5572	0.0014	upregulated	4	1.94104	0.1436	downregulated	3	1.52643	0.2173
anterior/posterior axis specification	GO	4 out of 7	6.01863	upregulated	2	1.091	0.3359					downregulated	3	1.92614	0.1457	downregulated	1	0.506411	0.6027	upregulated	3	1.45669	0.233	upregulated	2	1.26855	0.2812	upregulated	1	3.40853	0.0331
RNA polymerase II repressing transcription factor binding	GO	4 out of 7	6.00138	upregulated	2	1.4258	0.2403	downregulated	1	1.83556	0.1595	downregulated	3	2.64385	0.0711	downregulated	1	0.835979	0.4334	upregulated	6	3.93522	0.0195	downregulated	3	1.82343	0.1615
regulation of vasculogenesis	GO	3 out of 7	5.9973	upregulated	1	1.04409	0.352					downregulated	2	2.88317	0.056	downregulated	1	1.74171	0.1752	upregulated	3	3.21926	0.04	downregulated	1	0.802741	0.4481
C21-steroid hormone metabolic process	GO	3 out of 7	5.97381	upregulated	1	1.6237	0.1972					downregulated	1	0.463692	0.629	downregulated	3	4.8837	0.0076	upregulated	5	2.25013	0.1054
phosphatidylinositol binding	GO	4 out of 7	5.95488	downregulated	7	3.30963	0.0365	upregulated	5	1.34639	0.2602	downregulated	27	12.805	2.7e-06	downregulated	15	7.97163	0.0003	downregulated	42	8.59872	0.0002	downregulated	29	11.0939	1.5e-05	upregulated	2	2.90761	0.0546
dioxygenase activity	GO	4 out of 7	5.94889	downregulated	3	2.39089	0.0915	upregulated	6	2.44662	0.0866	downregulated	5	0.752375	0.4712	upregulated	3	3.27369	0.0379	upregulated	9	3.08249	0.0458	upregulated	3	5.44345	0.0043
positive regulation of adherens junction organization	GO	3 out of 7	5.94145	downregulated	2	4.61201	0.0099	upregulated	1	0.800398	0.4491	downregulated	4	3.42576	0.0325	upregulated	1	2.00878	0.1342	upregulated	5	3.83712	0.0216	downregulated	3	3.12426	0.044
positive regulation of cellular response to oxidative stress	GO	3 out of 7	5.93379	downregulated	2	2.9061	0.0547	upregulated	1	3.77638	0.0229	downregulated	1	0.203668	0.8157					upregulated	5	6.6004	0.0014
modification of morphology or physiology of other organism	GO	5 out of 7	5.92928	downregulated	4	2.10987	0.1213	upregulated	5	3.7707	0.023	downregulated	5	0.920971	0.3981	downregulated	2	0.232238	0.7928	upregulated	16	4.25344	0.0142	upregulated	7	2.18345	0.1127
erythrocyte maturation	GO	4 out of 7	5.91703	downregulated	1	3.88427	0.0206					downregulated	1	1.44014	0.2369	downregulated	1	2.15708	0.1157	upregulated	1	0.704879	0.4942	downregulated	2	2.26933	0.1034
dendritic cell migration	GO	3 out of 7	5.89633					downregulated	1	4.75278	0.0086	downregulated	3	2.48758	0.0831					downregulated	1	4.66074	0.0095	upregulated	3	3.31671	0.0363
regulation of establishment of endothelial barrier	GO	3 out of 7	5.88144	upregulated	1	1.657	0.1907					downregulated	1	1.33362	0.2635					upregulated	4	5.39898	0.0045	upregulated	1	0.805837	0.4467
response to salt	GO	3 out of 7	5.87001	upregulated	1	1.2534	0.2855	downregulated	1	3.52707	0.0294	downregulated	2	3.07389	0.0462					downregulated	3	5.47796	0.0042	upregulated	4	6.00042	0.0025
neuron fate commitment	GO	5 out of 7	5.82712	downregulated	2	0.845595	0.4293	downregulated	1	3.53305	0.0292	downregulated	7	4.26404	0.0141	downregulated	2	1.53642	0.2152	downregulated	7	7.52382	0.0005	upregulated	1	3.17184	0.0419
positive regulation of protein maturation	GO	4 out of 7	5.82551	downregulated	1	0.786226	0.4556	upregulated	3	4.27412	0.0139	downregulated	3	4.17162	0.0154	downregulated	2	5.68606	0.0034	downregulated	6	2.29767	0.1005	upregulated	2	1.75341	0.1732
semi-lunar valve development	GO	3 out of 7	5.79703	upregulated	3	2.98276	0.0507	upregulated	1	0.913092	0.4013	downregulated	2	1.35903	0.2569	downregulated	4	4.98763	0.0068	upregulated	6	6.49341	0.0015	downregulated	3	3.14718	0.043
cell-cell junction organization	GO	4 out of 7	5.76761	upregulated	7	5.60522	0.0037	downregulated	1	3.47627	0.0309	downregulated	12	5.03191	0.0065	downregulated	3	1.49585	0.2241	upregulated	24	6.50269	0.0015	downregulated	15	5.13389	0.0059
post-embryonic animal morphogenesis	GO	2 out of 7	5.75075													downregulated	1	0.639619	0.5275	upregulated	1	5.11113	0.006
basement membrane	GO	1 out of 7	5.74339	downregulated	3	2.74669	0.0641	upregulated	2	1.68035	0.1863	downregulated	6	2.42219	0.0887	downregulated	2	0.446461	0.6399	upregulated	20	11.6313	8.9e-06	upregulated	6	5.74339	0.0032
RNA polymerase II transcription factor complex	GO	3 out of 7	5.71051	downregulated	9	5.16078	0.0057	upregulated	6	1.67922	0.1865	upregulated	6	1.16658	0.3114	upregulated	2	2.87967	0.0562	upregulated	21	5.87245	0.0028	downregulated	7	0.619374	0.5383	upregulated	1	1.02214	0.3598
nuclear migration	GO	2 out of 7	5.66425					upregulated	3	5.11592	0.006	downregulated	6	9.37531	8.5e-05	downregulated	2	3.03572	0.048	downregulated	4	4.75565	0.0086	downregulated	2	1.63086	0.1958
positive regulation of epithelial cell apoptotic process	GO	4 out of 7	5.64333	upregulated	1	2.75102	0.0639	downregulated	1	1.6154	0.1988	downregulated	4	3.04357	0.0477	downregulated	3	2.19389	0.1115	upregulated	6	2.04574	0.1293	downregulated	1	0.504248	0.604
phosphoprotein binding	GO	2 out of 7	5.64007	upregulated	6	3.74344	0.0237	upregulated	1	0.248619	0.7799	downregulated	11	8.07428	0.0003	downregulated	6	7.25717	0.0007	downregulated	16	5.08082	0.0062	downregulated	9	4.36195	0.0128
response to cAMP	GO	4 out of 7	5.60709	downregulated	4	5.60456	0.0037	downregulated	1	0.278231	0.7571	downregulated	6	1.16735	0.3112	downregulated	7	3.97458	0.0188	upregulated	12	7.7269	0.0004	downregulated	11	5.41764	0.0044
positive regulation of apoptotic signaling pathway	GO	4 out of 7	5.57876	downregulated	6	1.6199	0.1979	upregulated	8	5.99558	0.0025	downregulated	17	5.67735	0.0034	downregulated	12	3.25941	0.0384	upregulated	25	9.1694	0.0001	downregulated	20	8.15172	0.0003
somatic diversification of immunoglobulins	GO	4 out of 7	5.54175	downregulated	1	0.583245	0.5581					downregulated	2	1.41023	0.2441	downregulated	3	2.30202	0.1001	upregulated	4	1.44524	0.2357	downregulated	1	0.198992	0.8196
positive regulation of response to oxidative stress	GO	3 out of 7	5.50906	downregulated	2	2.84395	0.0582	upregulated	1	3.66648	0.0256	downregulated	1	0.190507	0.8265					upregulated	5	6.14108	0.0022
bone trabecula morphogenesis	GO	3 out of 7	5.48077	downregulated	1	1.69729	0.1832					downregulated	2	3.05356	0.0472					upregulated	2	0.729919	0.4819
morphogenesis of embryonic epithelium	GO	3 out of 7	5.46462	upregulated	3	0.58956	0.5546	upregulated	4	2.52884	0.0798	downregulated	13	6.14111	0.0022	downregulated	4	0.637167	0.5288	upregulated	14	2.9449	0.0526	downregulated	8	1.14016	0.3198
phosphatidylinositol 3-kinase regulatory subunit binding	GO	3 out of 7	5.45294									downregulated	1	0.879127	0.4151	downregulated	2	3.61769	0.0268	upregulated	4	3.52011	0.0296	downregulated	2	2.56399	0.077
regulation of amyloid-beta clearance	GO	3 out of 7	5.45237					upregulated	1	1.07838	0.3401	downregulated	1	0.598749	0.5495	downregulated	1	3.72511	0.0241	upregulated	2	3.89194	0.0204	downregulated	1	1.68505	0.1854
nucleotide-binding domain, leucine rich repeat containing receptor signaling pathway	GO	4 out of 7	5.45079	upregulated	1	0.908993	0.4029	upregulated	1	0.598244	0.5498	downregulated	2	0.750393	0.4722	downregulated	1	0.794722	0.4517	upregulated	6	4.75154	0.0086	upregulated	1	0.661374	0.5161
platelet activation	GO	3 out of 7	5.44743	upregulated	5	1.40952	0.2443	upregulated	5	4.71635	0.0089	downregulated	11	4.28129	0.0138	downregulated	7	2.26965	0.1033	upregulated	26	11.606	9.1e-06	downregulated	15	6.58367	0.0014
establishment of spindle localization	GO	2 out of 7	5.44409	upregulated	1	2.23663	0.1068	upregulated	1	0.48789	0.6139	downregulated	7	6.03378	0.0024	downregulated	4	4.03664	0.0177	downregulated	7	3.01255	0.0492	downregulated	3	1.1259	0.3244
endocytic patch	GO	3 out of 7	5.43959	downregulated	2	4.31911	0.0133					downregulated	2	3.59636	0.0274					upregulated	1	0.613943	0.5412	downregulated	2	3.08982	0.0455
actin cortical patch	GO	3 out of 7	5.43959	downregulated	2	4.31911	0.0133					downregulated	2	3.59636	0.0274					upregulated	1	0.613943	0.5412	downregulated	2	3.08982	0.0455
negative regulation of amyloid precursor protein catabolic process	GO	3 out of 7	5.4302					upregulated	1	1.07838	0.3401	downregulated	2	1.62926	0.1961					upregulated	3	3.90426	0.0202	upregulated	1	0.975059	0.3772
RNAi effector complex	GO	3 out of 7	5.42316					upregulated	1	1.52519	0.2176	downregulated	3	2.02024	0.1326	downregulated	3	3.76491	0.0232	upregulated	3	1.1632	0.3125
alcohol metabolic process	GO	1 out of 7	5.41443	downregulated	7	3.93942	0.0195	upregulated	11	2.87107	0.0566	downregulated	19	8.57857	0.0002	downregulated	19	12.6285	3.3e-06	downregulated	54	6.30747	0.0018	upregulated	15	5.41443	0.0045
inner dynein arm assembly	GO	2 out of 7	5.39497																	upregulated	4	1.99176	0.1365	upregulated	1	3.40321	0.0333
chromatin DNA binding	GO	4 out of 7	5.36953	upregulated	7	2.18303	0.1127	upregulated	3	0.676893	0.5082	downregulated	12	2.1319	0.1186	upregulated	1	1.89101	0.1509	upregulated	13	1.63978	0.194	upregulated	5	2.41808	0.0891	upregulated	1	3.9307	0.0196
Fc-gamma receptor signaling pathway	GO	4 out of 7	5.34765	downregulated	6	3.80681	0.0222	downregulated	1	2.90431	0.0548	downregulated	10	5.18432	0.0056	downregulated	8	4.78629	0.0083	downregulated	16	3.75421	0.0234	downregulated	16	11.3341	1.2e-05
negative regulation of mesenchymal cell apoptotic process	GO	3 out of 7	5.26764	downregulated	1	1.41175	0.2437					downregulated	1	0.709183	0.492					upregulated	1	3.14671	0.043
intestinal lipid absorption	GO	3 out of 7	5.25525									downregulated	1	0.846421	0.4289	downregulated	2	4.13516	0.016	upregulated	1	0.273676	0.7606
basic amino acid transmembrane transport	GO	2 out of 7	5.22585																	upregulated	3	3.98083	0.0187	upregulated	1	1.24501	0.2879
negative regulation of cell motility	GO	3 out of 7	5.21894	upregulated	15	4.18284	0.0153	upregulated	9	3.27336	0.0379	downregulated	27	4.33533	0.0131	downregulated	14	6.03488	0.0024	upregulated	39	8.48121	0.0002	downregulated	24	6.17629	0.0021
endoplasmic reticulum lumen	GO	1 out of 7	5.20685	downregulated	10	4.26955	0.014	upregulated	8	1.36645	0.255	downregulated	21	4.33368	0.0131	downregulated	14	8.37465	0.0002	upregulated	36	11.2337	1.3e-05	upregulated	11	5.20685	0.0055
digestive system process	GO	2 out of 7	5.20441	upregulated	1	0.90384	0.405	upregulated	2	2.46685	0.0849	upregulated	2	1.65132	0.1918	downregulated	3	3.07524	0.0462	upregulated	9	9.93516	4.8e-05	downregulated	5	3.68782	0.025
interleukin-7-mediated signaling pathway	GO	3 out of 7	5.20231	upregulated	2	2.91178	0.0544					downregulated	2	1.12835	0.3236					upregulated	2	2.35789	0.0946	upregulated	2	1.71607	0.1798
positive regulation of cell junction assembly	GO	3 out of 7	5.14044	downregulated	2	4.37885	0.0125	upregulated	2	2.56846	0.0767	downregulated	4	2.98326	0.0506	upregulated	1	1.8957	0.1502	upregulated	7	5.0126	0.0067	downregulated	3	2.7701	0.0627
vitamin metabolic process	GO	3 out of 7	5.13514	upregulated	2	0.135429	0.8733	downregulated	3	1.84122	0.1586	downregulated	6	3.07828	0.046	upregulated	3	2.67273	0.0691	downregulated	19	0.856442	0.4247	upregulated	3	3.0238	0.0486
cellular response to platelet-derived growth factor stimulus	GO	2 out of 7	5.12107					upregulated	1	1.68599	0.1853	upregulated	1	2.98312	0.0506	downregulated	2	1.96977	0.1395	upregulated	7	8.60643	0.0002	downregulated	1	0.786026	0.4557
centriole replication	GO	3 out of 7	5.10827									downregulated	4	2.67949	0.0686	downregulated	2	1.68535	0.1854	upregulated	3	1.98119	0.1379	upregulated	1	0.743432	0.4755
negative regulation of cyclin-dependent protein kinase activity	GO	4 out of 7	5.09966	upregulated	2	1.46793	0.2304	downregulated	1	2.03281	0.131	downregulated	2	1.97797	0.1383	upregulated	1	2.72501	0.0655	upregulated	5	1.94522	0.143	upregulated	1	0.611584	0.5425
leukocyte homeostasis	GO	1 out of 7	5.09682	upregulated	1	2.82605	0.0592					downregulated	8	7.26602	0.0007	downregulated	5	5.25572	0.0052	upregulated	10	3.53305	0.0292	upregulated	2	5.09682	0.0061
ceramide transporter activity	GO	3 out of 7	5.08021	upregulated	1	1.03425	0.3555					downregulated	1	2.9109	0.0544	downregulated	1	1.94767	0.1426	upregulated	1	2.32618	0.0977	downregulated	1	1.07028	0.3429
signal transduction involved in mitotic G1 DNA damage checkpoint	GO	3 out of 7	5.07317	upregulated	1	0.0242328	0.9761	upregulated	4	3.79104	0.0226	downregulated	9	6.86057	0.001	downregulated	4	2.69796	0.0673	downregulated	5	0.856767	0.4245	upregulated	1	0.186685	0.8297
signal transduction involved in mitotic cell cycle checkpoint	GO	3 out of 7	5.07317	upregulated	1	0.0242328	0.9761	upregulated	4	3.79104	0.0226	downregulated	9	6.86057	0.001	downregulated	4	2.69796	0.0673	downregulated	5	0.856767	0.4245	upregulated	1	0.186685	0.8297
signal transduction involved in mitotic DNA damage checkpoint	GO	3 out of 7	5.07317	upregulated	1	0.0242328	0.9761	upregulated	4	3.79104	0.0226	downregulated	9	6.86057	0.001	downregulated	4	2.69796	0.0673	downregulated	5	0.856767	0.4245	upregulated	1	0.186685	0.8297
neural crest cell development	GO	3 out of 7	5.05979	upregulated	5	2.01414	0.1334	upregulated	2	3.8123	0.0221	downregulated	12	11.8391	7.2e-06	downregulated	3	1.07167	0.3424	upregulated	6	1.3402	0.2618	downregulated	8	3.36475	0.0346
anatomical structure regression	GO	1 out of 7	5.04416					upregulated	1	1.56136	0.2099									upregulated	4	6.60552	0.0014
photoreceptor disc membrane	GO	3 out of 7	5.0388									downregulated	1	1.14192	0.3192	downregulated	1	1.4898	0.2254	downregulated	1	0.262913	0.7688	upregulated	1	2.66999	0.0693
regulation of cytokine production involved in inflammatory response	GO	3 out of 7	5.0202	downregulated	3	4.01114	0.0181	upregulated	2	3.15378	0.0427									upregulated	4	2.99111	0.0502	upregulated	2	1.17172	0.3098
phosphatase binding	GO	4 out of 7	5.02015	downregulated	8	2.36931	0.0935	upregulated	3	1.58081	0.2058	downregulated	16	4.05684	0.0173	downregulated	7	2.30761	0.0995	upregulated	25	9.11067	0.0001	downregulated	23	11.2435	1.3e-05
interleukin-6 production	GO	3 out of 7	5.00659					upregulated	1	1.47968	0.2277	downregulated	1	1.16818	0.3109					upregulated	1	1.06527	0.3446					upregulated	1	4.25281	0.0142
cellular response to nutrient levels	GO	4 out of 7	5.00433	downregulated	4	3.91909	0.0199	upregulated	6	4.29011	0.0137	downregulated	16	3.82422	0.0218	downregulated	14	7.62109	0.0005	downregulated	29	6.31823	0.0018	downregulated	18	3.27034	0.038	upregulated	1	3.51861	0.0296
leukocyte differentiation	GO	1 out of 7	5.00015	downregulated	11	1.99937	0.1354	upregulated	7	2.25323	0.1051	downregulated	36	17.7973	1.9e-08	downregulated	20	12.1536	5.3e-06	upregulated	53	23.499	6.2e-11	upregulated	13	5.00015	0.0067
negative regulation of neural precursor cell proliferation	GO	3 out of 7	4.99621					upregulated	1	3.03253	0.0482	downregulated	2	2.58335	0.0755	downregulated	1	1.48926	0.2255	upregulated	3	3.95612	0.0191
response to nutrient	GO	3 out of 7	4.99278	downregulated	5	3.50998	0.0299	upregulated	11	7.68516	0.0005	downregulated	16	3.05932	0.0469	downregulated	16	9.78243	5.6e-05	downregulated	29	8.53468	0.0002	downregulated	15	3.67378	0.0254
inner ear morphogenesis	GO	3 out of 7	4.98375	downregulated	3	1.79968	0.1654	downregulated	2	1.56803	0.2085	upregulated	6	2.91668	0.0541					upregulated	11	3.45948	0.0314	upregulated	3	2.87291	0.0565
transferase activity, transferring alkyl or aryl (other than methyl) groups	GO	2 out of 7	4.98063	upregulated	2	1.06753	0.3439	upregulated	4	2.80057	0.0608	downregulated	5	3.58848	0.0276	downregulated	5	5.73185	0.0032	upregulated	7	2.66403	0.0697	downregulated	3	0.471596	0.624
endoderm development	GO	2 out of 7	4.95605	upregulated	1	1.09506	0.3345	upregulated	1	0.681151	0.506	downregulated	5	3.49705	0.0303	downregulated	4	3.23521	0.0394	upregulated	15	7.90183	0.0004
cell volume homeostasis	GO	3 out of 7	4.94382	downregulated	1	1.88014	0.1526					downregulated	3	3.51437	0.0298	downregulated	3	3.31239	0.0364	upregulated	4	3.49339	0.0304	downregulated	4	3.76309	0.0232
regulation of defense response to virus	GO	5 out of 7	4.94032	downregulated	2	1.31053	0.2697	upregulated	7	5.42643	0.0044	downregulated	5	2.05139	0.1286	downregulated	3	1.85354	0.1567	upregulated	11	4.91433	0.0073	upregulated	1	0.236975	0.789
protein K11-linked deubiquitination	GO	4 out of 7	4.93297	downregulated	1	2.73308	0.065	upregulated	1	1.09176	0.3356	downregulated	1	2.00483	0.1347	downregulated	1	2.22031	0.1086	upregulated	1	0.40872	0.6645	downregulated	1	1.34221	0.2613
cis-Golgi network	GO	1 out of 7	4.92017					upregulated	1	2.10356	0.122	downregulated	8	5.56024	0.0038	upregulated	2	2.98572	0.0505	upregulated	8	4.3201	0.0133	upregulated	6	4.92017	0.0073
regulation of extrinsic apoptotic signaling pathway in absence of ligand	GO	3 out of 7	4.9185	upregulated	2	1.38285	0.2509	upregulated	2	4.99041	0.0068	downregulated	3	1.66986	0.1883	downregulated	3	1.33777	0.2624	upregulated	10	9.81187	5.5e-05	downregulated	4	1.52774	0.217
cofactor transport	GO	3 out of 7	4.91339	upregulated	3	1.42741	0.2399	downregulated	1	0.5894	0.5547	downregulated	4	5.17109	0.0057	downregulated	1	1.38445	0.2505	downregulated	4	0.38613	0.6797	downregulated	2	0.418011	0.6584
ceramide transport	GO	3 out of 7	4.91256	upregulated	1	0.94522	0.3886					downregulated	1	2.73409	0.065	downregulated	1	1.8433	0.1583	upregulated	1	2.21888	0.1087	downregulated	1	0.938478	0.3912
dorsal/ventral axis specification	GO	2 out of 7	4.87928									upregulated	1	1.17392	0.3092					upregulated	2	2.77305	0.0625	upregulated	1	3.28015	0.0376
negative regulation of mRNA catabolic process	GO	4 out of 7	4.87747	upregulated	7	5.25436	0.0052	upregulated	1	0.818303	0.4412	downregulated	4	0.927746	0.3954	upregulated	1	1.1466	0.3177	upregulated	8	4.17535	0.0154	upregulated	2	3.10937	0.0446	upregulated	1	3.06596	0.0466
immunoglobulin complex, circulating	GO	2 out of 7	4.84701	downregulated	2	3.49595	0.0303																	upregulated	1	1.35106	0.259
aorta development	GO	3 out of 7	4.82861	upregulated	4	1.69752	0.1831	upregulated	1	1.44015	0.2369	downregulated	5	3.96502	0.019	downregulated	3	1.38189	0.2511	upregulated	8	5.38104	0.0046	downregulated	2	2.76167	0.0632
skeletal muscle cell differentiation	GO	3 out of 7	4.82341	upregulated	4	6.54873	0.0014					downregulated	4	1.94242	0.1434	downregulated	3	3.07761	0.0461	upregulated	5	7.25874	0.0007	downregulated	3	0.906637	0.4039
single-stranded RNA binding	GO	1 out of 7	4.77411	upregulated	5	0.790568	0.4536	upregulated	10	7.72768	0.0004	downregulated	14	4.5779	0.0103	downregulated	6	2.25029	0.1054	upregulated	17	9.69248	6.2e-05	upregulated	4	4.77411	0.0084
phagocytosis, recognition	GO	3 out of 7	4.76281	downregulated	2	2.68584	0.0682					downregulated	2	0.746432	0.4741	upregulated	1	1.53219	0.2161	upregulated	3	2.47266	0.0844	upregulated	2	2.86273	0.0571
peripheral nervous system development	GO	2 out of 7	4.75877	upregulated	1	0.593466	0.5524	upregulated	3	3.55212	0.0287	downregulated	13	14.521	4.9e-07	downregulated	3	1.15827	0.314	downregulated	15	14.6265	4.4e-07	downregulated	8	6.77489	0.0011
neural tube development	GO	3 out of 7	4.75188	upregulated	6	1.15341	0.3156	upregulated	3	2.46993	0.0846	downregulated	11	4.14709	0.0158	downregulated	4	0.549923	0.577	upregulated	19	4.78623	0.0083	downregulated	9	1.10801	0.3302
cytokine biosynthetic process	GO	2 out of 7	4.7373									downregulated	1	0.955055	0.3848					upregulated	3	3.78225	0.0228
positive regulation of vasculogenesis	GO	3 out of 7	4.6941									downregulated	2	3.51467	0.0298	downregulated	1	2.01406	0.1334	upregulated	1	0.226908	0.797	downregulated	1	1.06153	0.3459
retinoid binding	GO	1 out of 7	4.66531	upregulated	1	1.5507	0.2121					upregulated	2	2.44954	0.0863	upregulated	1	1.53689	0.215	downregulated	5	2.41962	0.089	upregulated	3	4.66531	0.0094
positive regulation of cytokine production involved in inflammatory response	GO	3 out of 7	4.65471	downregulated	2	3.30334	0.0368	upregulated	2	3.90022	0.0202									upregulated	4	4.41889	0.012	upregulated	1	0.832695	0.4349
actin filament	GO	1 out of 7	4.64497	upregulated	5	2.239	0.1066	upregulated	4	0.745661	0.4744	downregulated	6	1.12969	0.3231	downregulated	4	1.40488	0.2454	upregulated	24	16.9105	4.5e-08	upregulated	4	4.64497	0.0096
positive regulation of DNA biosynthetic process	GO	2 out of 7	4.63796	upregulated	5	3.7321	0.0239	upregulated	4	3.25197	0.0387	downregulated	7	7.09925	0.0008	downregulated	5	5.32335	0.0049	downregulated	16	4.05254	0.0174	downregulated	5	2.19277	0.1116
heterophilic cell-cell adhesion via plasma membrane cell adhesion molecules	GO	4 out of 7	4.62609	downregulated	3	2.83189	0.0589	downregulated	1	0.663068	0.5153	downregulated	4	4.79279	0.0083	downregulated	1	1.59888	0.2021	downregulated	10	4.82695	0.008	downregulated	7	5.26054	0.0052
toxin metabolic process	GO	3 out of 7	4.62178	upregulated	2	2.24707	0.1057	upregulated	1	1.07838	0.3401	downregulated	1	0.823507	0.4389					upregulated	5	4.99615	0.0068	upregulated	1	2.12758	0.1191
myeloid cell homeostasis	GO	1 out of 7	4.60839	downregulated	3	6.17091	0.0021	upregulated	2	0.313895	0.7306	downregulated	10	3.173	0.0419	downregulated	5	2.47313	0.0843	upregulated	17	10.289	3.4e-05	upregulated	4	4.60839	0.01	upregulated	1	1.65486	0.1911
cellular ketone metabolic process	GO	3 out of 7	4.60784	downregulated	2	0.894529	0.4088	upregulated	1	0.83041	0.4359	downregulated	4	0.976513	0.3766	downregulated	6	7.09683	0.0008	downregulated	12	1.70038	0.1826	downregulated	6	1.82924	0.1605
structural constituent of myelin sheath	GO	2 out of 7	4.592	downregulated	2	5.99192	0.0025					downregulated	4	7.60662	0.0005					downregulated	1	5.57692	0.0038	downregulated	1	3.42962	0.0324
regulation of odontogenesis of dentin-containing tooth	GO	2 out of 7	4.58522									downregulated	1	3.52945	0.0293					upregulated	2	3.93903	0.0195	downregulated	1	2.88327	0.056
positive regulation of p38MAPK cascade	GO	3 out of 7	4.58143	downregulated	1	3.86866	0.0209	downregulated	1	1.37627	0.2525	upregulated	1	0.985162	0.3734					upregulated	3	2.83461	0.0587	downregulated	2	2.51295	0.081
IkappaB kinase complex	GO	3 out of 7	4.56875					upregulated	1	1.1751	0.3088	downregulated	2	2.89908	0.0551	downregulated	2	2.58897	0.0751	upregulated	2	1.47021	0.2299	downregulated	1	1.21441	0.2969
sterol binding	GO	4 out of 7	4.56032	downregulated	1	0.616447	0.5399	upregulated	5	4.89588	0.0075	downregulated	4	1.76015	0.172	downregulated	4	6.27906	0.0019	upregulated	7	4.35199	0.0129	downregulated	3	3.55145	0.0287
spindle localization	GO	2 out of 7	4.556	upregulated	1	2.07947	0.125	upregulated	1	0.392548	0.6753	downregulated	7	5.21325	0.0054	downregulated	4	3.49787	0.0303	downregulated	9	2.84985	0.0579	downregulated	3	0.912716	0.4014
TORC1 signaling	GO	3 out of 7	4.55508	downregulated	1	1.44336	0.2361					downregulated	1	1.88815	0.1514	downregulated	1	1.22357	0.2942
positive regulation of chromosome organization	GO	4 out of 7	4.55361	upregulated	11	2.53116	0.0796	upregulated	9	3.83248	0.0217	downregulated	15	3.09533	0.0453	downregulated	13	5.28727	0.0051	upregulated	16	0.857417	0.4243	upregulated	9	1.67723	0.1869
regulation of cerebellar granule cell precursor proliferation	GO	2 out of 7	4.55246																	upregulated	1	0.829317	0.4363	upregulated	1	3.72314	0.0242
synaptonemal complex assembly	GO	3 out of 7	4.52314	upregulated	1	0.89606	0.4082	downregulated	1	1.37664	0.2524					downregulated	1	0.813867	0.4431	downregulated	2	0.149152	0.8614	upregulated	1	3.22869	0.0396
collagen trimer	GO	2 out of 7	4.50056	downregulated	1	0.208668	0.8117	downregulated	1	0.884592	0.4129	downregulated	6	1.89831	0.1498	downregulated	3	2.8452	0.0581	upregulated	16	11.0989	1.5e-05	upregulated	2	2.10068	0.1224	upregulated	1	2.39988	0.0907
positive regulation of blood pressure	GO	3 out of 7	4.48867					downregulated	1	1.91331	0.1476	upregulated	2	1.73169	0.177	upregulated	1	1.84433	0.1581	upregulated	6	2.73992	0.0646	upregulated	1	3.41145	0.033
mitotic G1/S transition checkpoint	GO	3 out of 7	4.48664	upregulated	3	0.273072	0.761	upregulated	4	3.55457	0.0286	downregulated	9	6.2306	0.002	downregulated	5	2.73367	0.065	downregulated	6	0.801803	0.4485	upregulated	1	0.151808	0.8592
response to fibroblast growth factor	GO	3 out of 7	4.48255	upregulated	9	4.48413	0.0113	upregulated	5	1.47745	0.2282	upregulated	7	4.07059	0.0171	downregulated	4	2.74357	0.0643	upregulated	14	6.8551	0.0011	upregulated	6	4.91604	0.0073
cysteine-type endopeptidase regulator activity involved in apoptotic process	GO	4 out of 7	4.45221	downregulated	2	1.46938	0.2301					upregulated	2	3.0197	0.0488	downregulated	4	3.44045	0.0321	upregulated	4	1.98603	0.1372	upregulated	1	0.576048	0.5621
adhesion of symbiont to host cell	GO	2 out of 7	4.43773	downregulated	2	3.78603	0.0227													upregulated	1	0.651707	0.5212
regulation of muscle contraction	GO	3 out of 7	4.42216	downregulated	3	3.60728	0.0271	upregulated	5	2.87198	0.0566	downregulated	11	4.58511	0.0102	downregulated	6	3.60449	0.0272	downregulated	32	10.4056	3e-05	downregulated	16	4.50274	0.0111
regulation of transforming growth factor beta receptor signaling pathway	GO	3 out of 7	4.40863	upregulated	5	2.23004	0.1075	downregulated	2	4.12832	0.0161	upregulated	7	4.94126	0.0071	downregulated	6	3.37947	0.0341	upregulated	16	9.5044	7.5e-05	downregulated	10	2.97201	0.0512	upregulated	1	1.66806	0.1886
caspase binding	GO	2 out of 7	4.37662					downregulated	1	2.43037	0.088									upregulated	2	1.94624	0.1428
T cell migration	GO	1 out of 7	4.37514																	upregulated	4	4.37514	0.0126
cellular response to reactive nitrogen species	GO	3 out of 7	4.36989	upregulated	2	2.85698	0.0574	upregulated	2	3.01635	0.049	upregulated	2	2.03211	0.1311	downregulated	3	2.67051	0.0692	upregulated	6	8.08685	0.0003	upregulated	1	1.51798	0.2192
lens development in camera-type eye	GO	1 out of 7	4.33117	downregulated	3	2.3145	0.0988	upregulated	2	2.21428	0.1092	downregulated	5	2.66148	0.0698	upregulated	2	1.83664	0.1594	upregulated	13	11.8363	7.2e-06	upregulated	2	4.33117	0.0132
positive regulation of interleukin-6 secretion	GO	3 out of 7	4.32587	downregulated	2	2.93813	0.053					downregulated	3	1.93692	0.1441	downregulated	1	1.74579	0.1745	downregulated	1	1.988	0.137	downregulated	1	0.30697	0.7357
protein localization to vacuole	GO	3 out of 7	4.32023	upregulated	4	3.64554	0.0261	upregulated	2	2.08937	0.1238	downregulated	5	2.41576	0.0893	downregulated	8	7.3814	0.0006	upregulated	9	3.93186	0.0196	downregulated	6	3.67388	0.0254
negative regulation of ATP metabolic process	GO	3 out of 7	4.31379	upregulated	2	1.43589	0.2379	downregulated	1	5.27525	0.0051	downregulated	1	0.495734	0.6091					upregulated	4	3.45191	0.0317	downregulated	2	3.47322	0.031
transcriptional repressor activity, RNA polymerase II distal enhancer sequence-specific binding	GO	3 out of 7	4.31152					downregulated	1	4.71801	0.0089	upregulated	2	3.82248	0.0219	downregulated	1	1.62263	0.1974	upregulated	3	4.79681	0.0083	downregulated	1	3.00346	0.0496
energy homeostasis	GO	3 out of 7	4.26687	upregulated	3	3.33527	0.0356	downregulated	2	4.84735	0.0078	downregulated	2	1.04884	0.3503					upregulated	5	4.75799	0.0086	downregulated	4	3.05205	0.0473
leukocyte adhesion to vascular endothelial cell	GO	3 out of 7	4.23082					upregulated	1	3.97472	0.0188	upregulated	1	1.35434	0.2581	downregulated	1	2.31507	0.0988	upregulated	4	3.97431	0.0188	upregulated	2	3.27051	0.038
Fc-gamma receptor signaling pathway involved in phagocytosis	GO	4 out of 7	4.17221	downregulated	5	2.89488	0.0553	downregulated	1	2.92908	0.0534	downregulated	10	5.39279	0.0045	downregulated	8	4.91838	0.0073	downregulated	16	3.83351	0.0216	downregulated	16	11.9629	6.4e-06
DNA repair complex	GO	2 out of 7	4.16754	upregulated	1	0.472687	0.6233	upregulated	3	3.30841	0.0366	downregulated	6	5.78214	0.0031	downregulated	3	2.6025	0.0741	downregulated	6	0.318799	0.727	downregulated	1	0.117198	0.8894
regulation of dopaminergic neuron differentiation	GO	2 out of 7	4.16138																	upregulated	1	2.95154	0.0523	upregulated	1	1.20984	0.2982
lymphocyte migration	GO	4 out of 7	4.16023	downregulated	2	1.66779	0.1887	upregulated	1	1.19732	0.302					downregulated	1	0.900152	0.4065	upregulated	4	1.48487	0.2265	upregulated	1	1.30474	0.2712
microtubule cytoskeleton organization involved in mitosis	GO	3 out of 7	4.14664	upregulated	5	1.48772	0.2259	upregulated	5	2.22579	0.108	downregulated	14	7.72989	0.0004	downregulated	7	3.18435	0.0414	downregulated	20	2.30966	0.0993	downregulated	9	2.44703	0.0866	upregulated	1	1.7026	0.1822
ncRNA transcription	GO	5 out of 7	4.11076	upregulated	3	0.193203	0.8243	downregulated	1	0.307177	0.7355	downregulated	9	2.31137	0.0991	downregulated	4	1.03716	0.3545	upregulated	6	0.149775	0.8609	upregulated	2	0.498474	0.6075
microtubule organizing center organization	GO	3 out of 7	4.10864	upregulated	3	0.99367	0.3702	upregulated	8	5.93368	0.0026	downregulated	12	5.36459	0.0047	downregulated	7	4.55626	0.0105	downregulated	11	0.768012	0.4639	upregulated	4	1.11514	0.3279
negative regulation of immune system process	GO	1 out of 7	4.05553	downregulated	6	0.0778807	0.9251	upregulated	13	3.25884	0.0384	downregulated	39	12.1296	5.4e-06	downregulated	25	17.7949	1.9e-08	upregulated	90	52.0656	2.4e-23	upregulated	20	4.05553	0.0173
immune response-activating signal transduction	GO	1 out of 7	4.05094	upregulated	13	4.04632	0.0175	downregulated	3	4.77078	0.0085	downregulated	49	28.5618	3.9e-13	downregulated	37	39.1802	9.6e-18	upregulated	66	20.0346	2e-09	upregulated	12	4.05094	0.0174
cell aggregation	GO	3 out of 7	4.04812	downregulated	1	1.15639	0.3146	upregulated	1	2.90243	0.0549	downregulated	1	0.2196	0.8028					upregulated	2	5.57456	0.0038
transcription elongation factor complex	GO	4 out of 7	4.04369	downregulated	1	0.471111	0.6243	downregulated	2	1.77355	0.1697	downregulated	2	0.163145	0.8495	downregulated	5	2.57989	0.0758	downregulated	8	1.21731	0.296	downregulated	3	0.944008	0.3891
body morphogenesis	GO	2 out of 7	4.04077	upregulated	2	0.338361	0.7129					upregulated	1	0.308479	0.7346	downregulated	2	0.510052	0.6005	upregulated	10	5.24543	0.0053	downregulated	2	1.06787	0.3437
immune response-activating cell surface receptor signaling pathway	GO	1 out of 7	4.0208	upregulated	13	4.30273	0.0135	downregulated	3	5.39327	0.0045	downregulated	34	17.0163	4.1e-08	downregulated	26	22.4615	1.8e-10	upregulated	40	10.7864	2.1e-05	upregulated	9	4.0208	0.0179
mitotic sister chromatid cohesion	GO	3 out of 7	4.00985	downregulated	1	3.62373	0.0267	upregulated	1	2.94466	0.0526	downregulated	3	2.10368	0.122	downregulated	1	1.22709	0.2931	upregulated	2	1.09142	0.3357
integrator complex	GO	3 out of 7	4.00849									downregulated	2	0.918781	0.399	downregulated	2	2.09025	0.1237	upregulated	1	0.999456	0.3681
plasma membrane tubulation	GO	2 out of 7	4.00601	downregulated	2	5.11126	0.006					downregulated	3	3.46656	0.0312					downregulated	2	2.50702	0.0815	downregulated	2	2.06478	0.1268
regulation of defense response to bacterium	GO	2 out of 7	4.00497									upregulated	1	4.7634	0.0085	downregulated	1	3.6731	0.0254	upregulated	3	2.08434	0.1244	downregulated	1	1.75248	0.1733
hair follicle morphogenesis	GO	3 out of 7	3.98495	downregulated	2	1.94448	0.1431	downregulated	1	4.31148	0.0134	downregulated	3	2.22348	0.1082					downregulated	2	4.49448	0.0112
hydrolase activity, acting on carbon-nitrogen (but not peptide) bonds, in cyclic amidines	GO	4 out of 7	3.94268	downregulated	1	1.19104	0.3039	upregulated	2	1.73616	0.1762	downregulated	3	4.89983	0.0074	downregulated	1	0.882383	0.4138	upregulated	3	0.946586	0.3881	downregulated	4	2.241	0.1064
cellular response to angiotensin	GO	3 out of 7	3.92089					upregulated	2	3.01281	0.0492	downregulated	2	0.802567	0.4482	downregulated	1	0.937453	0.3916	upregulated	6	6.54049	0.0014	downregulated	1	1.3468	0.2601
G1 DNA damage checkpoint	GO	3 out of 7	3.91187	upregulated	4	0.577552	0.5613	upregulated	4	3.45255	0.0317	downregulated	9	5.96218	0.0026	downregulated	5	2.61123	0.0734	downregulated	7	0.778155	0.4593	upregulated	1	0.146714	0.8635
negative regulation of extrinsic apoptotic signaling pathway in absence of ligand	GO	3 out of 7	3.88891	upregulated	1	1.76889	0.1705	upregulated	2	5.83642	0.0029	downregulated	3	2.61815	0.0729	downregulated	3	2.22184	0.1084	upregulated	7	7.70554	0.0005	downregulated	2	1.05131	0.3495
response to oxidative stress	GO	3 out of 7	3.88336	downregulated	10	2.58278	0.0756	upregulated	15	2.97847	0.0509	downregulated	30	6.31642	0.0018	downregulated	20	3.79809	0.0224	upregulated	42	12.2906	4.6e-06	downregulated	33	5.83546	0.0029
blood coagulation, fibrin clot formation	GO	2 out of 7	3.88057					downregulated	1	1.57263	0.2075	upregulated	1	2.54621	0.0784					upregulated	6	4.85415	0.0078
phospholipase A2 activity (consuming 1,2-dipalmitoylphosphatidylcholine)	GO	2 out of 7	3.87873									downregulated	1	1.53854	0.2147					upregulated	2	2.34019	0.0963
phospholipase A2 activity consuming 1,2-dioleoylphosphatidylethanolamine)	GO	2 out of 7	3.87873									downregulated	1	1.53854	0.2147					upregulated	2	2.34019	0.0963
insulin-like growth factor binding	GO	1 out of 7	3.85194	downregulated	1	1.68768	0.1849	upregulated	1	2.68614	0.0681	downregulated	1	1.2803	0.278	downregulated	2	4.42077	0.012	upregulated	7	8.04176	0.0003	upregulated	1	3.85194	0.0212
viral RNA genome replication	GO	3 out of 7	3.83428	upregulated	1	0.996781	0.3691	downregulated	1	4.92982	0.0072	downregulated	3	4.65355	0.0095	downregulated	1	2.74104	0.0645	downregulated	2	5.18504	0.0056	downregulated	2	2.3083	0.0994
epithelial cell maturation	GO	1 out of 7	3.82855	upregulated	1	0.659615	0.5171	upregulated	1	5.93152	0.0027	upregulated	1	1.20244	0.3005					upregulated	2	1.63399	0.1951	upregulated	1	3.82855	0.0217
positive regulation of protein localization to nucleus	GO	4 out of 7	3.79421	downregulated	2	1.11171	0.329	upregulated	1	0.0656498	0.9365	downregulated	4	1.0627	0.3455	downregulated	3	0.755997	0.4695	upregulated	11	1.92646	0.1457	downregulated	5	0.997009	0.369
muscle cell development	GO	3 out of 7	3.76478	upregulated	6	4.23257	0.0145	upregulated	5	1.53749	0.2149	downregulated	11	3.61303	0.027	downregulated	3	2.71703	0.0661	upregulated	19	6.32098	0.0018	downregulated	12	3.1162	0.0443
proximal/distal pattern formation	GO	2 out of 7	3.76233	upregulated	1	0.494422	0.6099					downregulated	3	3.68573	0.0251	downregulated	2	2.77641	0.0623	downregulated	2	1.13831	0.3204	downregulated	1	1.06708	0.344
spliceosomal complex	GO	2 out of 7	3.7596	upregulated	11	2.255	0.1049	upregulated	15	7.57245	0.0005	upregulated	5	2.24813	0.1056	downregulated	7	1.05876	0.3469	downregulated	23	0.469377	0.6254	upregulated	11	2.36572	0.0939	upregulated	1	1.39388	0.2481
Lys48-specific deubiquitinase activity	GO	3 out of 7	3.75762	downregulated	1	2.10946	0.1213	downregulated	1	1.3412	0.2615	upregulated	1	1.35964	0.2568	downregulated	1	1.87746	0.153	downregulated	1	0.210863	0.8099
response to molecule of bacterial origin	GO	1 out of 7	3.74276	downregulated	9	3.6961	0.0248	upregulated	6	4.77878	0.0084	downregulated	27	7.49876	0.0006	downregulated	20	8.33721	0.0002	upregulated	48	17.418	2.7e-08	upregulated	14	3.74276	0.0237
attachment of spindle microtubules to kinetochore	GO	2 out of 7	3.73756	upregulated	1	1.18482	0.3058	upregulated	2	1.94234	0.1434	downregulated	5	4.55279	0.0105	downregulated	2	2.89559	0.0553	downregulated	1	0.583664	0.5579
ciliary plasm	GO	5 out of 7	3.7356	upregulated	8	2.95357	0.0522	downregulated	1	0.102603	0.9025	downregulated	1	1.47992	0.2277	upregulated	2	1.57705	0.2066	upregulated	19	3.26752	0.0381	upregulated	4	1.85955	0.1557	upregulated	1	1.55664	0.2108
regulation of actomyosin structure organization	GO	4 out of 7	3.73273	upregulated	9	7.64507	0.0005	downregulated	1	3.03116	0.0483	downregulated	9	4.15693	0.0157	downregulated	2	0.893062	0.4094	upregulated	20	9.17726	0.0001	downregulated	10	5.88062	0.0028
regulation of lysosomal lumen pH	GO	1 out of 7	3.72912									downregulated	2	4.6607	0.0095									downregulated	1	0.931588	0.3939
positive regulation of neuron migration	GO	3 out of 7	3.69119									downregulated	3	4.36899	0.0127	downregulated	1	1.24249	0.2887	upregulated	2	1.95884	0.141	downregulated	3	3.87912	0.0207
regulation of histone H3-K9 acetylation	GO	3 out of 7	3.6869	downregulated	1	2.83185	0.0589	upregulated	1	1.69576	0.1835	downregulated	2	2.02397	0.1321					downregulated	2	2.00503	0.1347	upregulated	2	2.53186	0.0795
negative regulation of DNA biosynthetic process	GO	4 out of 7	3.68389	upregulated	3	2.02412	0.1321	upregulated	2	2.77032	0.0626	downregulated	3	1.54932	0.2124	downregulated	1	0.758712	0.4683	upregulated	4	1.98217	0.1378	upregulated	4	4.18812	0.0152
connexin complex	GO	1 out of 7	3.65871	downregulated	1	1.46743	0.2305	upregulated	1	5.01384	0.0066	downregulated	1	0.767028	0.4644	downregulated	1	2.80958	0.0602	upregulated	2	1.99685	0.1358	upregulated	1	3.65871	0.0258
cysteine-type peptidase activity	GO	4 out of 7	3.65692	downregulated	3	0.874644	0.417	upregulated	16	6.31361	0.0018	downregulated	16	4.31779	0.0133	downregulated	13	5.69779	0.0034	upregulated	17	0.563849	0.569	downregulated	10	1.48355	0.2268
animal organ formation	GO	3 out of 7	3.64992	upregulated	3	4.26052	0.0141					downregulated	4	6.20184	0.002	downregulated	1	0.805829	0.4467	upregulated	5	1.87267	0.1537	downregulated	2	0.969894	0.3791
isoprenoid metabolic process	GO	4 out of 7	3.63202	downregulated	1	1.25428	0.2853	upregulated	8	5.67352	0.0034	downregulated	4	3.09501	0.0453	downregulated	4	1.88938	0.1512	downregulated	17	4.43368	0.0119	upregulated	3	3.06686	0.0466
T cell mediated cytotoxicity	GO	1 out of 7	3.61615	downregulated	1	1.65786	0.1905					upregulated	1	0.837575	0.4328	upregulated	1	2.96918	0.0513	upregulated	4	6.23733	0.002	upregulated	3	3.61615	0.0269
mitochondrial intermembrane space	GO	1 out of 7	3.54706	upregulated	5	1.48119	0.2274	upregulated	3	2.25063	0.1053	downregulated	6	3.06148	0.0468	downregulated	3	2.30713	0.0995	downregulated	20	9.32115	9e-05	upregulated	1	3.54706	0.0288
regulation of chromosome separation	GO	3 out of 7	3.5374	upregulated	4	2.32267	0.098	upregulated	3	1.30292	0.2717	downregulated	7	4.21881	0.0147	downregulated	7	6.09135	0.0023	downregulated	13	3.9602	0.0191	upregulated	1	0.813028	0.4435
striated muscle cell development	GO	3 out of 7	3.53176	upregulated	5	4.40304	0.0122	upregulated	5	1.78397	0.168	downregulated	9	3.7021	0.0247	downregulated	2	2.80436	0.0605	upregulated	16	5.83982	0.0029	downregulated	10	2.62751	0.0723
oxygen transport	GO	2 out of 7	3.52603	downregulated	1	1.90087	0.1494					downregulated	1	5.59556	0.0037					downregulated	2	0.921744	0.3978	downregulated	1	3.04866	0.0474
regulation of cardiac muscle cell contraction	GO	4 out of 7	3.52451	downregulated	1	2.27105	0.1032	downregulated	1	3.31709	0.0363	downregulated	4	2.87896	0.0562	downregulated	1	1.54551	0.2132	downregulated	9	3.08891	0.0456	downregulated	5	3.39918	0.0334
inhibition of cysteine-type endopeptidase activity	GO	3 out of 7	3.50779	upregulated	1	0.801191	0.4488									downregulated	1	1.26608	0.2819	upregulated	1	1.47123	0.2296	upregulated	1	1.57167	0.2077
monosaccharide binding	GO	4 out of 7	3.4969	downregulated	2	1.07472	0.3414	upregulated	4	2.12577	0.1193	downregulated	4	0.886466	0.4121	downregulated	4	2.24132	0.1063	upregulated	8	4.03694	0.0177	downregulated	7	2.61678	0.073
positive regulation of T cell migration	GO	2 out of 7	3.44804									upregulated	1	2.06117	0.1273	downregulated	3	4.04461	0.0175	downregulated	2	0.426442	0.6528	upregulated	1	1.89105	0.1509
axoneme	GO	2 out of 7	3.43758	upregulated	8	2.97849	0.0509	downregulated	1	0.10522	0.9001	downregulated	1	1.48897	0.2256	upregulated	2	1.58623	0.2047	upregulated	19	3.36346	0.0346	upregulated	4	1.87179	0.1538	upregulated	1	1.56579	0.2089
neuron maturation	GO	2 out of 7	3.42197	upregulated	1	0.833725	0.4344					downregulated	6	7.20132	0.0007	downregulated	4	7.02204	0.0009	downregulated	8	8.57037	0.0002	downregulated	3	1.3973	0.2473
regulation of blood pressure	GO	2 out of 7	3.4149	upregulated	3	3.03247	0.0482	upregulated	6	1.34807	0.2597	downregulated	8	3.10546	0.0448	upregulated	3	1.77235	0.1699	upregulated	22	4.71889	0.0089	upregulated	8	4.8489	0.0078
regulation of actin cytoskeleton reorganization	GO	3 out of 7	3.40099	downregulated	2	4.5151	0.0109	downregulated	1	4.123	0.0162	downregulated	4	2.62669	0.0723					downregulated	9	5.82775	0.0029	downregulated	4	2.03605	0.1305
positive regulation of vascular smooth muscle cell proliferation	GO	2 out of 7	3.40074	upregulated	2	1.17139	0.3099					upregulated	1	0.5312	0.5879	downregulated	1	0.94824	0.3874	upregulated	8	7.47573	0.0006	downregulated	3	3.32065	0.0361
embryonic heart tube development	GO	5 out of 7	3.38057	upregulated	8	6.37707	0.0017	downregulated	3	5.79742	0.003	downregulated	4	2.86227	0.0571	downregulated	3	2.01387	0.1335	downregulated	10	5.11525	0.006	upregulated	1	2.3617	0.0943	upregulated	1	1.83761	0.1592
endoplasmic reticulum mannose trimming	GO	3 out of 7	3.37385	upregulated	1	0.55854	0.572	upregulated	2	1.90724	0.1485	downregulated	1	0.30586	0.7365	downregulated	2	2.40612	0.0902	downregulated	1	0.0598381	0.9419					upregulated	1	3.18749	0.0413
detection of light stimulus involved in sensory perception	GO	3 out of 7	3.36079	upregulated	1	2.02349	0.1322					downregulated	1	1.94832	0.1425	downregulated	1	1.876	0.1532	downregulated	3	2.29228	0.101	upregulated	1	3.85224	0.0212
signal transduction in response to DNA damage	GO	4 out of 7	3.32656	downregulated	1	1.79531	0.1661	upregulated	8	3.4851	0.0307	downregulated	10	3.53247	0.0292	downregulated	5	1.38032	0.2515	upregulated	12	1.0539	0.3486	downregulated	6	0.950352	0.3866
positive regulation by host of viral process	GO	2 out of 7	3.32253					upregulated	3	6.19866	0.002									upregulated	4	6.62496	0.0013	upregulated	1	2.89622	0.0552
negative regulation of cellular component movement	GO	4 out of 7	3.31726	upregulated	17	5.38983	0.0046	upregulated	10	4.2279	0.0146	downregulated	33	7.37388	0.0006	downregulated	15	5.59354	0.0037	upregulated	42	8.40044	0.0002	downregulated	30	9.19234	0.0001	upregulated	1	0.759465	0.4679
regulation of tumor necrosis factor secretion	GO	3 out of 7	3.27949	downregulated	1	1.34016	0.2618					downregulated	3	4.44248	0.0118	downregulated	2	3.77218	0.023	downregulated	3	3.86739	0.0209	downregulated	3	2.40795	0.09
positive regulation of cytokine production	GO	1 out of 7	3.26374	downregulated	15	3.33938	0.0355	upregulated	14	4.58748	0.0102	downregulated	33	5.61829	0.0036	downregulated	25	18.9162	6.1e-09	upregulated	77	37.9884	3.2e-17	upregulated	10	3.26374	0.0382	upregulated	1	0.692814	0.5002
positive regulation of endoplasmic reticulum unfolded protein response	GO	3 out of 7	3.25259									downregulated	2	3.17061	0.042	downregulated	1	0.746405	0.4741	upregulated	1	0.14027	0.8691	downregulated	1	0.804687	0.4472
positive regulation of endothelial cell apoptotic process	GO	4 out of 7	3.23199	upregulated	1	3.2697	0.038	downregulated	1	2.10318	0.1221	downregulated	1	1.62976	0.196	downregulated	1	0.696809	0.4982	upregulated	4	2.95406	0.0521	downregulated	1	0.882118	0.4139
sulfate transmembrane transport	GO	2 out of 7	3.23081	upregulated	1	1.15269	0.3158					downregulated	2	2.66613	0.0695					downregulated	1	0.809077	0.4453	upregulated	1	1.71736	0.1795
regulation of neural precursor cell proliferation	GO	3 out of 7	3.20744	upregulated	2	2.56532	0.0769	upregulated	4	4.19528	0.0151	downregulated	4	3.48498	0.0307	downregulated	2	1.38543	0.2502	upregulated	14	6.93949	0.001	upregulated	1	1.64312	0.1934
retina vasculature morphogenesis in camera-type eye	GO	2 out of 7	3.20509	downregulated	1	2.93825	0.053					upregulated	1	1.83239	0.16					upregulated	1	2.09923	0.1226
cytoskeleton-dependent cytokinesis	GO	3 out of 7	3.1994	upregulated	4	1.44579	0.2356	upregulated	2	0.386726	0.6793	downregulated	8	4.62408	0.0098	downregulated	5	1.65868	0.1904	downregulated	15	1.00093	0.3675	downregulated	7	2.11232	0.121	upregulated	1	1.86239	0.1553
leukocyte mediated cytotoxicity	GO	1 out of 7	3.19352	downregulated	1	1.18068	0.3071	upregulated	1	0.485522	0.6154	upregulated	2	1.36307	0.2559	upregulated	1	2.19041	0.1119	upregulated	5	4.69991	0.0091	upregulated	4	3.19352	0.041
transcriptional repressor complex	GO	2 out of 7	3.18448	upregulated	6	1.90005	0.1496	downregulated	2	2.61015	0.0735	upregulated	3	0.979915	0.3753	downregulated	2	0.516411	0.5967	upregulated	16	7.71553	0.0004	downregulated	8	2.1675	0.1145
sex differentiation	GO	4 out of 7	3.1787	downregulated	6	2.46737	0.0848	upregulated	8	4.81125	0.0081	downregulated	14	2.8215	0.0595	downregulated	12	1.66649	0.1889	upregulated	40	15.6121	1.7e-07	downregulated	16	1.38694	0.2498	upregulated	1	2.42154	0.0888
autophagosome organization	GO	3 out of 7	3.17606	upregulated	2	0.519569	0.5948	upregulated	1	0.187551	0.829	downregulated	9	7.4196	0.0006	downregulated	4	1.62751	0.1964	downregulated	9	1.69742	0.1832	downregulated	9	5.47551	0.0042	upregulated	1	2.00901	0.1341
regulation of endoplasmic reticulum stress-induced intrinsic apoptotic signaling pathway	GO	3 out of 7	3.15913	upregulated	1	0.542784	0.5811	downregulated	2	2.2942	0.1008	downregulated	1	2.76842	0.0628					upregulated	2	1.33359	0.2635	downregulated	4	2.69429	0.0676
G-rich strand telomeric DNA binding	GO	3 out of 7	3.13296	upregulated	3	3.84764	0.0213	upregulated	1	2.75134	0.0638	downregulated	2	4.00858	0.0182	downregulated	2	3.64548	0.0261	downregulated	2	0.561034	0.5706	upregulated	2	2.63891	0.0714
telomere maintenance via telomere trimming	GO	2 out of 7	3.1285									downregulated	1	2.33505	0.0968					upregulated	1	0.79345	0.4523
t-circle formation	GO	2 out of 7	3.1285									downregulated	1	2.33505	0.0968					upregulated	1	0.79345	0.4523
regulation of endoplasmic reticulum unfolded protein response	GO	3 out of 7	3.12491					upregulated	1	0.433197	0.6484	downregulated	4	2.74036	0.0645	downregulated	2	1.34212	0.2613	upregulated	2	0.506639	0.6025	downregulated	2	1.03101	0.3566
positive regulation of macrophage migration	GO	4 out of 7	3.04454					upregulated	1	6.91158	0.001	downregulated	1	2.18321	0.1127	downregulated	2	3.96617	0.0189	upregulated	3	1.32096	0.2669	upregulated	1	2.48578	0.0833
response to water	GO	2 out of 7	3.02978					downregulated	1	2.63044	0.072	upregulated	1	1.86574	0.1548	downregulated	2	3.58895	0.0276	downregulated	2	1.32387	0.2661
positive regulation of lamellipodium organization	GO	3 out of 7	3.01939	upregulated	1	1.35342	0.2584	downregulated	1	4.123	0.0162	downregulated	5	3.7242	0.0241	downregulated	3	2.64492	0.071	downregulated	4	4.49448	0.0112	downregulated	3	1.62483	0.1969
phosphatidylethanolamine acyl-chain remodeling	GO	3 out of 7	3.01304					downregulated	1	1.13743	0.3206	downregulated	1	1.21764	0.2959					upregulated	4	1.68411	0.1856	downregulated	1	1.02614	0.3584
maintenance of protein location	GO	3 out of 7	2.99109	upregulated	6	3.61636	0.0269	upregulated	6	5.08485	0.0062	downregulated	11	4.01075	0.0181	downregulated	7	5.66816	0.0035	upregulated	15	7.2698	0.0007	downregulated	10	5.2564	0.0052
negative regulation of reactive oxygen species metabolic process	GO	3 out of 7	2.97991	downregulated	4	3.16875	0.0421	upregulated	2	2.17862	0.1132	downregulated	5	1.04869	0.3504	upregulated	1	1.74347	0.1749	upregulated	8	3.90898	0.0201	downregulated	3	1.22442	0.2939
segment specification	GO	2 out of 7	2.97901	upregulated	1	0.998685	0.3684	upregulated	1	2.35145	0.0952	downregulated	2	2.47591	0.0841	downregulated	2	4.4312	0.0119	upregulated	2	1.91259	0.1477	downregulated	1	0.577968	0.561
endolysosome	GO	2 out of 7	2.96475					upregulated	1	3.38957	0.0337	downregulated	2	2.76842	0.0628	downregulated	6	14.5264	4.9e-07	downregulated	7	6.80667	0.0011	downregulated	4	4.1338	0.016
regulation of production of miRNAs involved in gene silencing by miRNA	GO	3 out of 7	2.94975									downregulated	2	0.647742	0.5232	downregulated	1	0.689453	0.5019	upregulated	3	3.05985	0.0469	downregulated	2	1.44729	0.2352
CD40 receptor complex	GO	2 out of 7	2.94785	upregulated	1	1.23234	0.2916					upregulated	1	2.16087	0.1152	downregulated	2	3.14357	0.0431	upregulated	1	1.03662	0.3547
programmed necrotic cell death	GO	3 out of 7	2.93365					upregulated	2	7.4595	0.0006	downregulated	2	0.869313	0.4192	downregulated	2	2.08287	0.1246	upregulated	7	7.78608	0.0004	downregulated	1	0.345112	0.7081
vacuolar lumen	GO	1 out of 7	2.93286	upregulated	4	0.643432	0.5255	upregulated	8	2.71827	0.066	downregulated	23	12.5607	3.5e-06	downregulated	18	17.4534	2.6e-08	upregulated	20	8.16846	0.0003	upregulated	4	2.93286	0.0532
regulation of embryonic development	GO	4 out of 7	2.92769	upregulated	8	2.5924	0.0748	upregulated	3	2.54277	0.0786	downregulated	12	2.94307	0.0527	downregulated	2	1.88963	0.1511	upregulated	15	1.05175	0.3493	upregulated	6	2.1784	0.1132
pseudopodium	GO	2 out of 7	2.89227	upregulated	1	1.58356	0.2052	upregulated	1	0.924089	0.3969	downregulated	4	4.55279	0.0105	downregulated	2	2.78087	0.062	upregulated	2	2.43224	0.0878	downregulated	2	1.93375	0.1446
MLL3/4 complex	GO	3 out of 7	2.87524	upregulated	1	0.960393	0.3827					downregulated	1	0.470395	0.6248					upregulated	2	1.79357	0.1664	upregulated	1	1.57167	0.2077
regulation of gene expression, epigenetic	GO	5 out of 7	2.84431	downregulated	6	2.61191	0.0734	upregulated	14	8.59635	0.0002	downregulated	27	4.52286	0.0109	downregulated	13	2.65284	0.0705	upregulated	20	0.513162	0.5986	upregulated	9	1.13989	0.3199
replicative senescence	GO	2 out of 7	2.8349					upregulated	1	1.8698	0.1542	downregulated	2	2.74256	0.0644	downregulated	1	2.6801	0.0686	downregulated	1	0.550507	0.5767	downregulated	1	0.717964	0.4877
acute inflammatory response	GO	1 out of 7	2.83016	upregulated	1	2.55092	0.078	downregulated	1	0.373854	0.6881	downregulated	6	5.80816	0.003	upregulated	2	3.80052	0.0224	upregulated	13	12.5901	3.4e-06	upregulated	2	2.83016	0.059
positive regulation of endothelial cell chemotaxis	GO	3 out of 7	2.8121	downregulated	1	4.07441	0.017	downregulated	1	2.0926	0.1234									upregulated	2	4.28572	0.0138	downregulated	3	7.64063	0.0005
regulation of vascular endothelial growth factor signaling pathway	GO	1 out of 7	2.80589									downregulated	2	4.24305	0.0144					downregulated	2	0.814154	0.443	downregulated	1	0.623009	0.5363
pyrimidine nucleotide-sugar transmembrane transport	GO	3 out of 7	2.79865	downregulated	1	1.94015	0.1437	upregulated	1	1.9674	0.1398	downregulated	1	2.08726	0.124	downregulated	1	1.96841	0.1397	downregulated	3	1.22978	0.2924
cellular aldehyde metabolic process	GO	1 out of 7	2.73079	downregulated	2	0.822319	0.4394	upregulated	5	2.61505	0.0732	upregulated	2	1.50222	0.2226	downregulated	6	6.45841	0.0016	upregulated	5	1.18826	0.3048	upregulated	2	2.73079	0.0652
carboxylic acid binding	GO	4 out of 7	2.72803	downregulated	3	4.1344	0.016	upregulated	12	9.2735	9.4e-05	downregulated	11	4.82353	0.008	downregulated	9	4.51587	0.0109	downregulated	30	5.90704	0.0027	upregulated	8	4.43477	0.0119
negative regulation of viral-induced cytoplasmic pattern recognition receptor signaling pathway	GO	2 out of 7	2.72371					upregulated	2	3.2808	0.0376	downregulated	1	2.86575	0.0569					upregulated	2	3.13875	0.0433
regulation of heart morphogenesis	GO	2 out of 7	2.6811	upregulated	5	4.22725	0.0146	upregulated	1	0.695342	0.4989	upregulated	3	2.84545	0.0581	downregulated	2	2.12108	0.1199	upregulated	11	9.65619	6.4e-05	downregulated	2	1.32813	0.265
nucleus localization	GO	2 out of 7	2.67515					upregulated	3	4.67268	0.0093	downregulated	7	10.5465	2.6e-05	downregulated	2	2.85821	0.0574	downregulated	4	4.57412	0.0103	downregulated	2	1.48277	0.227
actin polymerization or depolymerization	GO	4 out of 7	2.66812	upregulated	2	1.70952	0.181	downregulated	2	5.12769	0.0059	downregulated	4	1.47605	0.2285	downregulated	1	0.606787	0.5451	downregulated	9	3.86	0.0211	downregulated	7	4.97625	0.0069	upregulated	1	2.14337	0.1173
deaminase activity	GO	4 out of 7	2.65246	downregulated	1	1.40256	0.246	upregulated	3	3.83974	0.0215	downregulated	2	5.122	0.006	downregulated	1	1.07745	0.3405	upregulated	3	1.37461	0.2529	downregulated	4	2.48442	0.0834
cell killing	GO	1 out of 7	2.63252	downregulated	3	2.54553	0.0784	upregulated	1	0.209806	0.8107	upregulated	2	0.675532	0.5089	upregulated	1	1.49499	0.2243	upregulated	7	3.4977	0.0303	upregulated	6	2.63252	0.0719
CatSper complex	GO	1 out of 7	2.62523									downregulated	1	2.62523	0.0724
negative regulation of double-strand break repair via homologous recombination	GO	3 out of 7	2.58896	upregulated	1	0.74698	0.4738					downregulated	2	1.80606	0.1643	downregulated	1	1.127	0.324	upregulated	1	0.402876	0.6684
core promoter sequence-specific DNA binding	GO	2 out of 7	2.56203	upregulated	1	0.234643	0.7909	upregulated	1	0.40667	0.6659	upregulated	2	2.56339	0.077	downregulated	3	1.96228	0.1405	upregulated	6	4.97841	0.0069	downregulated	3	1.17395	0.3091
estrogen metabolic process	GO	2 out of 7	2.5506					upregulated	1	1.0469	0.351	downregulated	3	1.683	0.1858	downregulated	3	4.67153	0.0094	downregulated	2	0.764265	0.4657	downregulated	1	1.99275	0.1363
peptidyl-prolyl cis-trans isomerase activity	GO	1 out of 7	2.54967	downregulated	1	3.80672	0.0222					upregulated	1	0.972727	0.3781					downregulated	8	5.47221	0.0042	upregulated	3	2.54967	0.0781
phosphatidylinositol acyl-chain remodeling	GO	2 out of 7	2.54659									downregulated	1	1.73117	0.1771					upregulated	2	1.51734	0.2193	downregulated	1	0.701915	0.4956
detection of light stimulus	GO	4 out of 7	2.5272	downregulated	2	2.35436	0.095	downregulated	1	1.58193	0.2056	downregulated	3	2.17889	0.1132	downregulated	2	2.02729	0.1317	downregulated	9	2.69857	0.0673	downregulated	5	2.91669	0.0541
negative regulation of cellular senescence	GO	2 out of 7	2.50148					upregulated	1	0.659439	0.5171	downregulated	1	0.418495	0.658					upregulated	1	2.74242	0.0644
germ cell development	GO	2 out of 7	2.48943	upregulated	10	1.13215	0.3223	downregulated	3	3.70543	0.0246	upregulated	9	3.94498	0.0194	downregulated	14	6.34017	0.0018	upregulated	19	2.93494	0.0531	downregulated	18	2.47903	0.0838
negative regulation of transcription regulatory region DNA binding	GO	3 out of 7	2.4786	upregulated	1	0.822563	0.4393	upregulated	1	3.38957	0.0337	downregulated	1	1.62402	0.1971	downregulated	2	1.74217	0.1751	upregulated	4	4.11057	0.0164	downregulated	1	0.786026	0.4557
regulation of systemic arterial blood pressure by hormone	GO	1 out of 7	2.47415	downregulated	1	0.668332	0.5126	upregulated	1	0.589126	0.5548	upregulated	2	2.12102	0.1199	upregulated	2	3.60194	0.0273	upregulated	4	1.70091	0.1825	upregulated	1	2.47415	0.0842
regulation of cellular response to hypoxia	GO	3 out of 7	2.4571					downregulated	1	2.01267	0.1336	upregulated	1	2.26655	0.1037					upregulated	2	1.65037	0.192	upregulated	1	1.06062	0.3462
opsonin binding	GO	1 out of 7	2.45306									downregulated	3	5.35247	0.0047	downregulated	2	4.84373	0.0079	upregulated	4	6.28784	0.0019	upregulated	1	2.45306	0.086
site of DNA damage	GO	4 out of 7	2.42524	upregulated	3	0.97078	0.3788	upregulated	3	1.14507	0.3182	downregulated	3	0.311974	0.732	downregulated	5	3.25348	0.0386	upregulated	5	0.768309	0.4638	upregulated	1	0.207332	0.8127
chylomicron	GO	3 out of 7	2.37905					upregulated	1	1.30968	0.2699	downregulated	1	0.639388	0.5276					upregulated	1	2.12203	0.1198	upregulated	1	0.927301	0.3956
apoptotic process involved in development	GO	3 out of 7	2.37257	upregulated	1	2.67367	0.069					downregulated	2	1.47933	0.2278	downregulated	2	2.59324	0.0748	upregulated	3	3.32299	0.036	downregulated	2	2.34931	0.0954
positive regulation of signal transduction by p53 class mediator	GO	3 out of 7	2.36977	downregulated	1	2.75102	0.0639					downregulated	3	3.18749	0.0413	downregulated	1	2.26804	0.1035	downregulated	4	2.09728	0.1228	downregulated	3	3.73951	0.0238
nuclear inner membrane	GO	1 out of 7	2.36503	upregulated	3	0.977608	0.3762	upregulated	3	1.98119	0.1379	downregulated	4	2.68043	0.0685	downregulated	2	1.55495	0.2112	downregulated	8	1.177	0.3082	upregulated	4	2.36503	0.0939
endoplasmic reticulum quality control compartment	GO	4 out of 7	2.35861	upregulated	1	0.335616	0.7149	upregulated	3	2.52381	0.0802	downregulated	1	0.149883	0.8608	downregulated	2	1.76939	0.1704	downregulated	2	0.169027	0.8445	upregulated	1	0.661374	0.5161	upregulated	1	2.80642	0.0604
metallopeptidase activity	GO	4 out of 7	2.3304	upregulated	6	0.721221	0.4862	downregulated	3	0.729429	0.4822	upregulated	7	4.3525	0.0129	downregulated	9	2.99473	0.05	upregulated	13	1.05677	0.3476	upregulated	4	2.6232	0.0726
fucosylation	GO	2 out of 7	2.31003													downregulated	1	1.95673	0.1413	upregulated	1	0.353303	0.7024
positive regulation of DNA-dependent DNA replication	GO	1 out of 7	2.30901					downregulated	1	2.30901	0.0994									upregulated	1	1.14034	0.3197
regulation of striated muscle tissue development	GO	4 out of 7	2.30293	upregulated	11	6.91343	0.001	downregulated	2	0.628457	0.5334	downregulated	12	8.59801	0.0002	downregulated	5	1.67504	0.1873	upregulated	21	8.93063	0.0001	downregulated	7	4.74554	0.0087	upregulated	2	3.06041	0.0469
maintenance of cell polarity	GO	2 out of 7	2.29655									downregulated	2	3.79041	0.0226	upregulated	1	4.14385	0.0159	upregulated	1	2.24195	0.1063	downregulated	3	3.73581	0.0239
lipid modification	GO	3 out of 7	2.29026	upregulated	12	0.703844	0.4947	upregulated	13	2.9249	0.0537	downregulated	20	6.50278	0.0015	downregulated	11	2.94954	0.0524	upregulated	31	3.91987	0.0198	downregulated	25	7.45319	0.0006
positive regulation of nuclear-transcribed mRNA catabolic process, deadenylation-dependent decay	GO	2 out of 7	2.27465					upregulated	2	2.0897	0.1237	upregulated	1	1.35306	0.2584	upregulated	1	4.21049	0.0148	upregulated	4	7.81423	0.0004	upregulated	1	2.11368	0.1208
calcineurin-mediated signaling	GO	3 out of 7	2.24372	downregulated	1	1.58623	0.2047					upregulated	1	2.95299	0.0522	downregulated	1	1.33574	0.263	upregulated	4	4.8347	0.0079	downregulated	2	2.55996	0.0773
negative regulation of endoplasmic reticulum stress-induced intrinsic apoptotic signaling pathway	GO	2 out of 7	2.21765	upregulated	1	1.01904	0.3609	downregulated	2	3.46905	0.0311									upregulated	2	2.34019	0.0963	downregulated	3	2.57254	0.0763
water transmembrane transporter activity	GO	1 out of 7	2.20208	upregulated	1	0.776522	0.46													upregulated	4	13.7092	1.1e-06	upregulated	1	2.20208	0.1106
placenta development	GO	1 out of 7	2.18942	downregulated	5	2.79951	0.0608	upregulated	4	1.40219	0.2461	downregulated	10	3.53735	0.0291	downregulated	13	6.37391	0.0017	upregulated	18	4.95737	0.007	upregulated	8	2.18942	0.112	upregulated	1	1.57784	0.2064
telomerase holoenzyme complex	GO	1 out of 7	2.18195	upregulated	2	1.95552	0.1415	upregulated	2	2.01679	0.1331	downregulated	2	1.03908	0.3538	downregulated	1	1.92653	0.1457	downregulated	2	0.574896	0.5628	upregulated	1	2.18195	0.1128
positive regulation of amyloid precursor protein catabolic process	GO	3 out of 7	2.17347									downregulated	1	1.81978	0.1621	downregulated	2	3.20684	0.0405	upregulated	2	3.79764	0.0224	downregulated	4	6.65078	0.0013
structural constituent of nuclear pore	GO	2 out of 7	2.15557	upregulated	1	0.344601	0.7085	upregulated	1	0.649471	0.5223	downregulated	3	1.331	0.2642	downregulated	4	4.34835	0.0129	downregulated	2	2.20648	0.1101	downregulated	1	0.323229	0.7238
sex determination	GO	3 out of 7	2.13821	upregulated	1	1.82788	0.1608					downregulated	1	1.44944	0.2347	downregulated	1	1.3283	0.2649	downregulated	3	4.51131	0.011	upregulated	1	1.18835	0.3047
regulation of cellular response to insulin stimulus	GO	3 out of 7	2.12083	downregulated	6	5.91985	0.0027	downregulated	1	0.248565	0.7799	upregulated	1	0.118467	0.8883					upregulated	8	2.84962	0.0579	downregulated	7	6.77874	0.0011
response to redox state	GO	2 out of 7	2.11574					downregulated	1	4.99735	0.0068	downregulated	2	3.46423	0.0313					downregulated	4	4.33641	0.0131	downregulated	2	2.00943	0.1341
antigen binding	GO	1 out of 7	2.09799	upregulated	1	5.48749	0.0041	upregulated	1	0.190349	0.8267	downregulated	10	13.4407	1.5e-06	downregulated	7	19.2885	4.2e-09	upregulated	15	9.48968	7.6e-05	upregulated	4	2.09799	0.1227
modulation by virus of host morphology or physiology	GO	4 out of 7	2.07213	downregulated	3	4.27435	0.0139	upregulated	2	5.15002	0.0058	downregulated	1	0.908462	0.4031	downregulated	1	0.660561	0.5166	upregulated	6	2.8616	0.0572	downregulated	3	1.48283	0.227
regulation of T-helper 17 cell differentiation	GO	2 out of 7	2.0091									downregulated	1	0.408434	0.6647					upregulated	3	1.60067	0.2018
regulation of nucleocytoplasmic transport	GO	4 out of 7	2.00739	upregulated	5	1.20016	0.3011	upregulated	6	2.60057	0.0742	downregulated	7	0.918035	0.3993	downregulated	7	1.79677	0.1658	upregulated	19	4.40701	0.0122	downregulated	10	2.66274	0.0698	upregulated	1	1.34904	0.2595
negative regulation of muscle tissue development	GO	2 out of 7	2.00715	upregulated	3	3.05679	0.047					downregulated	6	7.79238	0.0004	upregulated	1	2.31403	0.0989	upregulated	9	6.19817	0.002	downregulated	4	6.61258	0.0013
isoprenoid biosynthetic process	GO	3 out of 7	1.99432					upregulated	2	4.39283	0.0124	downregulated	1	2.14353	0.1172	downregulated	2	3.63804	0.0263	downregulated	5	3.01411	0.0491	upregulated	1	3.61968	0.0268
complement binding	GO	1 out of 7	1.9728									downregulated	3	4.46694	0.0115	downregulated	2	4.53967	0.0107	upregulated	6	8.99645	0.0001	upregulated	1	1.9728	0.1391
positive regulation of response to endoplasmic reticulum stress	GO	3 out of 7	1.96501	upregulated	2	0.971216	0.3786	upregulated	3	2.42545	0.0884	downregulated	3	2.38803	0.0918	downregulated	2	0.867145	0.4201	downregulated	5	0.57082	0.5651	upregulated	1	2.67732	0.0687
positive regulation of stem cell differentiation	GO	1 out of 7	1.96216	upregulated	2	2.68547	0.0682	upregulated	1	0.600322	0.5486	upregulated	1	0.947414	0.3877					upregulated	6	6.74187	0.0012	downregulated	1	0.546502	0.579
photoreceptor inner segment	GO	1 out of 7	1.95052	upregulated	2	0.868666	0.4195	upregulated	2	1.04778	0.3507	downregulated	5	3.86569	0.0209	downregulated	4	3.44406	0.0319	downregulated	10	4.10782	0.0164	upregulated	2	1.95052	0.1422	upregulated	1	3.53403	0.0292
positive regulation of T-helper 17 type immune response	GO	1 out of 7	1.94624																	upregulated	2	1.94624	0.1428
positive regulation of cellular protein localization	GO	5 out of 7	1.94229	downregulated	8	0.979261	0.3756	downregulated	6	2.18337	0.1127	downregulated	25	3.30077	0.0369	downregulated	15	3.09195	0.0454	upregulated	48	11.5076	1e-05	downregulated	44	19.1207	5e-09
positive regulation of cell cycle	GO	3 out of 7	1.90196	upregulated	14	0.737738	0.4782	upregulated	17	4.33596	0.0131	downregulated	32	4.36522	0.0127	downregulated	18	1.46134	0.2319	downregulated	58	2.2373	0.1067	upregulated	18	3.38641	0.0338
establishment or maintenance of epithelial cell apical/basal polarity	GO	3 out of 7	1.89978	upregulated	2	0.881423	0.4142	downregulated	2	3.847	0.0213	downregulated	2	0.88395	0.4131	upregulated	1	3.03599	0.048	upregulated	8	9.11993	0.0001	downregulated	8	8.03368	0.0003
response to mitochondrial depolarisation	GO	3 out of 7	1.87366	downregulated	1	1.30306	0.2717					downregulated	3	1.81018	0.1636	downregulated	2	1.9007	0.1495	downregulated	2	0.476512	0.6209	downregulated	3	2.66377	0.0697
sperm motility	GO	4 out of 7	1.85859	upregulated	2	0.378756	0.6847	upregulated	3	1.04541	0.3515	downregulated	1	0.123359	0.8839	downregulated	1	0.188166	0.8285	upregulated	8	1.6842	0.1856	downregulated	4	1.18115	0.3069	upregulated	1	2.46818	0.0847
ATP-dependent microtubule motor activity	GO	3 out of 7	1.85051	upregulated	1	1.34154	0.2614	upregulated	1	1.05104	0.3496	downregulated	4	2.239	0.1066	downregulated	1	0.246774	0.7813	upregulated	6	1.75731	0.1725	downregulated	6	2.27095	0.1032
regulation of PERK-mediated unfolded protein response	GO	2 out of 7	1.84007					upregulated	1	0.992992	0.3705	downregulated	2	3.53678	0.0291	downregulated	1	1.05353	0.3487	downregulated	1	0.0907054	0.9133	downregulated	1	1.66654	0.1889
peristalsis	GO	1 out of 7	1.83674									downregulated	2	4.35379	0.0129					downregulated	1	1.0761	0.3409	downregulated	1	1.44095	0.2367
neuronal stem cell division	GO	2 out of 7	1.82971					downregulated	1	1.84398	0.1582	downregulated	2	4.65103	0.0096	upregulated	1	2.13869	0.1178	downregulated	1	1.82426	0.1613	downregulated	1	0.702347	0.4954
vacuole organization	GO	3 out of 7	1.82657	upregulated	5	1.03088	0.3567	upregulated	4	0.72646	0.4836	downregulated	16	9.87863	5.1e-05	downregulated	11	4.6632	0.0094	downregulated	21	2.25066	0.1053	downregulated	20	12.3559	4.3e-06	upregulated	1	1.39794	0.2471
positive regulation of secretion	GO	4 out of 7	1.8165	downregulated	7	1.09213	0.3355	upregulated	17	4.2738	0.0139	downregulated	24	6.36961	0.0017	downregulated	19	12.2123	5e-06	downregulated	76	17.2567	3.2e-08	downregulated	43	14.9858	3.1e-07	upregulated	1	1.40202	0.2461
regulation of T-helper 17 type immune response	GO	2 out of 7	1.80925									downregulated	1	0.371243	0.6899					upregulated	3	1.438	0.2374
RNA localization	GO	1 out of 7	1.79913	downregulated	3	0.25203	0.7772	upregulated	10	2.23661	0.1068	downregulated	21	6.24716	0.0019	downregulated	16	8.39439	0.0002	upregulated	17	1.21814	0.2958	upregulated	9	1.79913	0.1654
humoral immune response mediated by circulating immunoglobulin	GO	1 out of 7	1.78161	downregulated	3	2.46895	0.0847					downregulated	3	3.40797	0.0331	downregulated	4	6.56689	0.0014	upregulated	12	22.6001	1.5e-10	upregulated	3	1.78161	0.1684
negative regulation of ubiquitin-dependent protein catabolic process	GO	1 out of 7	1.78144	downregulated	1	2.55542	0.0777					downregulated	4	2.21147	0.1095	upregulated	1	1.98163	0.1378	downregulated	9	0.70762	0.4928	upregulated	1	2.48906	0.083
astrocyte projection	GO	1 out of 7	1.76651									upregulated	1	1.79841	0.1656					upregulated	3	5.93157	0.0027	downregulated	1	2.36664	0.0938
centrosome cycle	GO	2 out of 7	1.72026	upregulated	3	1.19355	0.3031	upregulated	7	6.03609	0.0024	downregulated	10	4.47432	0.0114	downregulated	7	5.4372	0.0044	downregulated	8	0.360321	0.6975	downregulated	5	0.961623	0.3823
pyrimidine-containing compound transmembrane transport	GO	1 out of 7	1.71133																	upregulated	1	1.71133	0.1806
nucleus organization	GO	3 out of 7	1.65503	downregulated	2	1.60979	0.1999	upregulated	7	1.29946	0.2727	downregulated	10	0.708888	0.4922	downregulated	10	3.26638	0.0381	downregulated	18	0.733025	0.4805	downregulated	8	2.63057	0.072
beta-catenin destruction complex disassembly	GO	4 out of 7	1.63253					upregulated	1	3.08654	0.0457	downregulated	2	1.26691	0.2817	downregulated	1	1.02602	0.3584	upregulated	3	1.5374	0.2149	upregulated	1	0.888734	0.4112
cytoplasmic ribonucleoprotein granule	GO	3 out of 7	1.61426	upregulated	8	1.15344	0.3155	downregulated	3	2.26415	0.1039	downregulated	18	2.29973	0.1003	downregulated	12	3.09588	0.0452	downregulated	32	3.6528	0.0259	downregulated	12	1.23927	0.2896
regionalization	GO	1 out of 7	1.6058	upregulated	17	2.28152	0.1021	downregulated	4	1.42238	0.2411	downregulated	21	6.1567	0.0021	downregulated	10	1.68387	0.1857	upregulated	36	7.73747	0.0004	upregulated	10	1.6058	0.2007	upregulated	1	1.60277	0.2013
RNA export from nucleus	GO	1 out of 7	1.59312	downregulated	2	0.184168	0.8318	upregulated	8	2.64748	0.0708	upregulated	6	3.52958	0.0293	downregulated	10	4.90268	0.0074	downregulated	22	0.830275	0.4359	upregulated	7	1.59312	0.2033
regulation of cardiac muscle cell action potential	GO	3 out of 7	1.58323	upregulated	1	0.470829	0.6245	downregulated	1	3.69315	0.0249	downregulated	3	2.18601	0.1124	downregulated	1	1.72908	0.1774	downregulated	8	3.78591	0.0227	downregulated	3	1.76828	0.1706
establishment of protein localization to vacuole	GO	2 out of 7	1.57032	upregulated	3	1.84125	0.1586	upregulated	1	0.927577	0.3955	downregulated	4	2.59835	0.0744	downregulated	6	5.67081	0.0034	upregulated	7	3.81881	0.022	downregulated	6	3.93001	0.0196
regulation of podosome assembly	GO	3 out of 7	1.55305					upregulated	1	2.41038	0.0898	downregulated	2	2.07731	0.1253	downregulated	1	1.29699	0.2734	upregulated	4	2.53153	0.0795	downregulated	2	1.94239	0.1434
cobalamin binding	GO	1 out of 7	1.51006													downregulated	1	1.83314	0.1599	downregulated	1	0.323079	0.7239
phagosome maturation	GO	2 out of 7	1.4942	upregulated	1	1.37858	0.2519					upregulated	1	2.90874	0.0545	downregulated	3	3.91336	0.02	upregulated	4	4.64834	0.0096	downregulated	2	2.78018	0.062
signal transduction involved in DNA damage checkpoint	GO	2 out of 7	1.48559	upregulated	2	0.0566625	0.9449	upregulated	7	4.5134	0.011	downregulated	9	5.08159	0.0062	downregulated	5	2.43174	0.0879	downregulated	9	0.699446	0.4969	downregulated	4	0.758235	0.4685
midbody	GO	3 out of 7	1.45545	upregulated	12	2.9596	0.0518	downregulated	3	5.96984	0.0026	downregulated	18	3.95039	0.0192	downregulated	8	1.45166	0.2342	downregulated	28	3.88621	0.0205	downregulated	15	3.07063	0.0464
activation of cysteine-type endopeptidase activity	GO	3 out of 7	1.45125	downregulated	1	1.53441	0.2156					upregulated	2	3.08419	0.0458	downregulated	1	0.837662	0.4327	upregulated	5	7.11711	0.0008	downregulated	3	4.95374	0.0071
lipid digestion	GO	2 out of 7	1.44077									upregulated	1	2.80159	0.0607	downregulated	2	4.00095	0.0183	upregulated	1	0.241414	0.7855
positive regulation of protein import	GO	3 out of 7	1.43351	upregulated	2	1.40847	0.2445	upregulated	1	0.194855	0.823	downregulated	3	1.60563	0.2008	downregulated	2	0.805038	0.4471	upregulated	8	1.55143	0.2119	downregulated	3	0.925268	0.3964
protein membrane anchor	GO	3 out of 7	1.42468					upregulated	1	2.04582	0.1293	downregulated	1	1.63445	0.1951	downregulated	1	1.10736	0.3304	upregulated	2	0.728694	0.4825
signal transduction involved in cell cycle checkpoint	GO	2 out of 7	1.41837	upregulated	2	0.0535668	0.9478	upregulated	7	4.45687	0.0116	downregulated	9	4.97281	0.0069	downregulated	5	2.38053	0.0925	downregulated	9	0.689588	0.5018	downregulated	4	0.734954	0.4795
vascular smooth muscle cell differentiation	GO	3 out of 7	1.41744	downregulated	2	4.54274	0.0106	upregulated	1	1.73587	0.1762	downregulated	1	0.426992	0.6525					upregulated	2	1.24593	0.2877	downregulated	1	3.06235	0.0468
sequence-specific single stranded DNA binding	GO	3 out of 7	1.4145	upregulated	3	2.99266	0.0502	upregulated	2	3.11025	0.0446	downregulated	2	3.29168	0.0372	downregulated	2	2.94194	0.0528	downregulated	3	0.706943	0.4931	upregulated	2	1.99074	0.1366
lipid droplet	GO	1 out of 7	1.39939	downregulated	1	1.57771	0.2064	upregulated	5	5.14938	0.0058	downregulated	4	4.44614	0.0117	downregulated	5	2.88478	0.0559	upregulated	10	3.6981	0.0248	upregulated	2	1.39939	0.2467
cytidine deaminase activity	GO	1 out of 7	1.39547	downregulated	1	2.36425	0.094	upregulated	1	2.83587	0.0587									upregulated	2	2.14619	0.1169	upregulated	1	1.39547	0.2477
embryonic skeletal joint development	GO	2 out of 7	1.39525	downregulated	2	3.46264	0.0313					upregulated	1	2.39898	0.0908					upregulated	1	0.331584	0.7178
adaptive immune response based on somatic recombination of immune receptors built from immunoglobulin superfamily domains	GO	1 out of 7	1.38711	downregulated	6	1.88835	0.1513	upregulated	2	1.58414	0.2051	downregulated	12	4.29019	0.0137	downregulated	9	5.48779	0.0041	upregulated	37	24.8243	1.7e-11	upregulated	6	1.38711	0.2498
regulation of amyloid-beta formation	GO	3 out of 7	1.38533					upregulated	1	0.774303	0.461	downregulated	2	1.07067	0.3428	downregulated	1	0.857688	0.4241	upregulated	4	4.19186	0.0151	downregulated	3	3.96059	0.0191
clathrin adaptor activity	GO	3 out of 7	1.38532	downregulated	2	3.90665	0.0201	downregulated	1	1.66351	0.1895	downregulated	3	5.86073	0.0028					downregulated	5	5.98622	0.0025	downregulated	3	4.05936	0.0173
endocytic adaptor activity	GO	3 out of 7	1.38532	downregulated	2	3.90665	0.0201	downregulated	1	1.66351	0.1895	downregulated	3	5.86073	0.0028					downregulated	5	5.98622	0.0025	downregulated	3	4.05936	0.0173
intramolecular transferase activity	GO	3 out of 7	1.38195	upregulated	1	0.636593	0.5291	downregulated	1	2.4188	0.089	downregulated	2	3.25466	0.0386	downregulated	4	7.76087	0.0004	downregulated	7	4.85386	0.0078	downregulated	6	6.56191	0.0014
seminiferous tubule development	GO	3 out of 7	1.37188	upregulated	1	0.929689	0.3947	upregulated	1	1.01889	0.361	upregulated	1	1.46894	0.2302	downregulated	1	1.16891	0.3107	upregulated	3	1.81025	0.1636	upregulated	1	1.81024	0.1636
respiratory gaseous exchange	GO	2 out of 7	1.36325	upregulated	2	1.57193	0.2076	upregulated	2	1.73608	0.1762	downregulated	1	2.32205	0.0981	upregulated	2	2.46563	0.085	upregulated	6	3.65539	0.0259	upregulated	2	3.07876	0.046
arrestin family protein binding	GO	2 out of 7	1.35944					upregulated	1	1.19732	0.302	downregulated	1	1.42196	0.2412	downregulated	1	1.62951	0.196	downregulated	2	0.494701	0.6098
purine-containing compound transmembrane transport	GO	3 out of 7	1.35006	downregulated	1	1.50241	0.2226					downregulated	1	1.17981	0.3073	downregulated	1	1.52519	0.2176	downregulated	2	1.34504	0.2605	downregulated	1	1.51232	0.2204
nucleotide transmembrane transport	GO	3 out of 7	1.32975	downregulated	1	1.22612	0.2934	downregulated	2	5.04983	0.0064	upregulated	1	1.04543	0.3515	downregulated	1	1.2478	0.2871	downregulated	4	3.94754	0.0193	downregulated	1	1.20104	0.3009
core promoter binding	GO	2 out of 7	1.32296	upregulated	2	0.367639	0.6924	upregulated	2	0.864723	0.4212	upregulated	2	2.12272	0.1197	downregulated	3	1.30829	0.2703	upregulated	6	4.08358	0.0168	downregulated	3	0.713822	0.4898
ribonucleoprotein granule	GO	3 out of 7	1.31057	upregulated	9	1.10205	0.3322	downregulated	3	2.20475	0.1103	downregulated	19	2.21589	0.1091	downregulated	12	2.68559	0.0682	downregulated	38	3.49333	0.0304	downregulated	13	1.20029	0.3011
Wnt signalosome	GO	1 out of 7	1.31001																	upregulated	2	2.16447	0.1148	downregulated	1	0.854463	0.4255
response to ionizing radiation	GO	4 out of 7	1.29744	upregulated	8	1.64694	0.1926	upregulated	14	7.04937	0.0009	upregulated	8	4.23884	0.0144	downregulated	4	0.548975	0.5775	upregulated	14	6.45523	0.0016	upregulated	3	4.28155	0.0138	upregulated	2	2.94683	0.0525
digestion	GO	2 out of 7	1.29449	downregulated	2	0.746899	0.4738	upregulated	3	2.95436	0.0521	upregulated	3	2.17601	0.1135	downregulated	5	3.70627	0.0246	downregulated	12	7.9297	0.0004	upregulated	1	2.71859	0.066
glutathione binding	GO	1 out of 7	1.2801	upregulated	1	1.79567	0.166													upregulated	2	3.07577	0.0462
maintenance of location in cell	GO	3 out of 7	1.27799	upregulated	5	2.92391	0.0537	upregulated	8	7.11867	0.0008	downregulated	13	5.67244	0.0034	downregulated	6	5.79076	0.0031	upregulated	12	5.28003	0.0051	downregulated	9	5.42266	0.0044
cytoplasmic side of endoplasmic reticulum membrane	GO	2 out of 7	1.26157													downregulated	1	1.33827	0.2623	upregulated	2	1.45925	0.2324	downregulated	1	1.53594	0.2153
presynaptic membrane organization	GO	1 out of 7	1.25388	upregulated	1	1.28865	0.2756					downregulated	3	7.02727	0.0009	upregulated	1	3.72436	0.0241	downregulated	2	1.54952	0.2124	downregulated	1	0.760385	0.4675
RNA polymerase I activity	GO	3 out of 7	1.25338	downregulated	1	1.50241	0.2226	downregulated	2	3.82036	0.0219	downregulated	1	1.57488	0.207					downregulated	4	3.56794	0.0282	downregulated	2	2.07633	0.1254
regulation of amyloid precursor protein catabolic process	GO	3 out of 7	1.24921	upregulated	1	0.386221	0.6796	upregulated	1	0.626748	0.5343	downregulated	3	3.24205	0.0391	downregulated	2	1.91212	0.1478	upregulated	5	4.85087	0.0078	downregulated	6	7.74286	0.0004
positive regulation of transcription from RNA polymerase II promoter in response to endoplasmic reticulum stress	GO	3 out of 7	1.24727					upregulated	1	1.88837	0.1513	upregulated	1	2.83852	0.0585	downregulated	1	1.2375	0.2901	upregulated	1	1.63892	0.1942	upregulated	2	3.09775	0.0452
eye morphogenesis	GO	3 out of 7	1.22723	upregulated	9	7.2154	0.0007	upregulated	3	1.49502	0.2242	downregulated	13	5.22145	0.0054	upregulated	1	1.07474	0.3414	upregulated	16	9.48563	7.6e-05	downregulated	11	6.00635	0.0025	upregulated	1	2.31165	0.0991
mitotic spindle organization	GO	3 out of 7	1.20187	upregulated	5	2.01208	0.1337	upregulated	5	2.53913	0.0789	downregulated	8	2.7902	0.0614	downregulated	4	1.23708	0.2902	downregulated	16	2.49869	0.0822	downregulated	7	2.25144	0.1052	upregulated	1	1.96516	0.1401
negative regulation of autophagosome assembly	GO	2 out of 7	1.20147					upregulated	1	0.977783	0.3761	downregulated	1	0.767381	0.4642	downregulated	2	2.58897	0.0751	downregulated	2	0.392923	0.6751	downregulated	1	0.784181	0.4565
establishment or maintenance of apical/basal cell polarity	GO	3 out of 7	1.19995	upregulated	2	0.840449	0.4315	downregulated	2	3.79299	0.0225	downregulated	2	0.799609	0.4495	upregulated	1	2.96545	0.0515	upregulated	9	8.76877	0.0002	downregulated	9	8.35551	0.0002
regulation of RIG-I signaling pathway	GO	2 out of 7	1.18744					upregulated	1	3.17221	0.0419	downregulated	3	3.57893	0.0279	downregulated	1	1.18376	0.3061	downregulated	1	0.403036	0.6683
positive regulation of extrinsic apoptotic signaling pathway	GO	4 out of 7	1.18268	upregulated	2	0.13996	0.8694	upregulated	4	9.37475	8.5e-05	downregulated	4	0.674418	0.5095	downregulated	5	2.36099	0.0943	upregulated	10	6.02721	0.0024	upregulated	3	1.63477	0.195
positive regulation of extrinsic apoptotic signaling pathway via death domain receptors	GO	2 out of 7	1.16558									upregulated	1	1.09048	0.3361	upregulated	1	2.93877	0.0529	upregulated	3	2.58387	0.0755	upregulated	2	2.61095	0.0735
cytokine activity	GO	1 out of 7	1.11964	downregulated	9	4.74326	0.0087	upregulated	3	3.59903	0.0274	downregulated	8	2.26631	0.1037	downregulated	5	2.91303	0.0543	upregulated	18	4.9328	0.0072	upregulated	4	1.11964	0.3264
acid-thiol ligase activity	GO	3 out of 7	1.10747	downregulated	3	4.49222	0.0112	upregulated	1	0.589359	0.5547	upregulated	4	5.89066	0.0028	downregulated	1	1.01673	0.3618	downregulated	6	5.46974	0.0042	upregulated	1	2.07853	0.1251
negative regulation of double-strand break repair	GO	2 out of 7	1.08737	upregulated	1	0.339362	0.7122					downregulated	2	0.882873	0.4136	downregulated	2	1.57286	0.2075	downregulated	2	0.524674	0.5917	downregulated	1	0.504327	0.6039
regulation of transcription from RNA polymerase II promoter in response to hypoxia	GO	3 out of 7	1.04751	downregulated	2	3.24886	0.0388	upregulated	1	1.94973	0.1423	downregulated	4	2.53861	0.079	downregulated	4	3.15309	0.0427	downregulated	6	3.53567	0.0291	downregulated	6	5.94333	0.0026
multicellular organismal movement	GO	3 out of 7	1.02184	downregulated	3	5.28185	0.0051	downregulated	1	1.22866	0.2927	upregulated	2	2.08713	0.124	upregulated	2	4.5843	0.0102	upregulated	4	3.5857	0.0277	downregulated	4	2.40294	0.0905
musculoskeletal movement	GO	3 out of 7	1.02184	downregulated	3	5.28185	0.0051	downregulated	1	1.22866	0.2927	upregulated	2	2.08713	0.124	upregulated	2	4.5843	0.0102	upregulated	4	3.5857	0.0277	downregulated	4	2.40294	0.0905
sister chromatid cohesion	GO	3 out of 7	1.00464	downregulated	1	2.73175	0.0651	upregulated	2	1.85148	0.157	downregulated	3	0.531269	0.5879	downregulated	1	0.547578	0.5783	upregulated	6	2.18656	0.1123	downregulated	2	0.954478	0.385
mismatch repair complex	GO	2 out of 7	0.990996									downregulated	1	2.16113	0.1152	downregulated	1	1.37782	0.2521	downregulated	3	1.93687	0.1442	downregulated	1	0.611083	0.5428
negative regulation of NIK/NF-kappaB signaling	GO	3 out of 7	0.98515	downregulated	1	0.950045	0.3867	upregulated	1	0.726799	0.4835	downregulated	1	0.29479	0.7447					upregulated	2	2.51189	0.0811	downregulated	1	2.04477	0.1294
RNA polymerase complex	GO	3 out of 7	0.974633	downregulated	3	0.946758	0.388	upregulated	8	2.96162	0.0517	downregulated	9	1.13105	0.3227	downregulated	9	3.88636	0.0205	downregulated	17	0.70691	0.4932	downregulated	8	1.321	0.2669
antigen processing and presentation of peptide antigen via MHC class I	GO	1 out of 7	0.962639	upregulated	1	0.324389	0.723	upregulated	2	0.451885	0.6364	upregulated	3	2.91598	0.0542	downregulated	5	3.02269	0.0487	upregulated	10	7.28241	0.0007	upregulated	3	0.962639	0.3819
regulation of neuromuscular junction development	GO	2 out of 7	0.929418					upregulated	1	2.42014	0.0889									upregulated	1	1.28472	0.2767	upregulated	1	2.06484	0.1268
oocyte differentiation	GO	5 out of 7	0.898741	downregulated	1	0.566302	0.5676	downregulated	1	0.800429	0.4491	upregulated	1	5.78482	0.0031	downregulated	3	2.51066	0.0812	upregulated	4	0.930982	0.3942	upregulated	3	1.87519	0.1533
FMN binding	GO	2 out of 7	0.898715									downregulated	2	2.87459	0.0564	downregulated	1	1.3364	0.2628	downregulated	3	1.55033	0.2122	downregulated	2	1.76195	0.1717
protein alpha-1,2-demannosylation	GO	3 out of 7	0.893804	upregulated	1	0.410446	0.6634	upregulated	2	1.52494	0.2176	downregulated	1	0.199337	0.8193	downregulated	2	1.99377	0.1362	downregulated	1	0.0263188	0.974	downregulated	1	2.28199	0.1021	upregulated	1	2.94439	0.0526
regulation of double-strand break repair via nonhomologous end joining	GO	2 out of 7	0.88694					upregulated	1	0.747067	0.4738	upregulated	1	1.24784	0.2871	downregulated	1	0.917126	0.3997	upregulated	2	1.96472	0.1402
chondrocyte proliferation	GO	2 out of 7	0.876607	downregulated	2	3.45025	0.0317	upregulated	1	3.45025	0.0317	upregulated	1	2.08503	0.1243					upregulated	2	2.96164	0.0517
positive regulation of response to DNA damage stimulus	GO	2 out of 7	0.869139	upregulated	6	2.80186	0.0607	upregulated	5	2.30584	0.0997	downregulated	7	1.877	0.153	downregulated	10	8.45006	0.0002	upregulated	9	2.15092	0.1164	downregulated	9	4.62415	0.0098
negative regulation of telomere maintenance via telomere lengthening	GO	3 out of 7	0.85161	upregulated	3	2.52944	0.0797	upregulated	1	1.97137	0.1393	downregulated	2	1.22908	0.2926	downregulated	1	1.07894	0.34					upregulated	3	3.04439	0.0476
regulation of carbohydrate metabolic process	GO	1 out of 7	0.849641	upregulated	7	2.84424	0.0582	downregulated	6	2.33068	0.0972	upregulated	4	1.69507	0.1836	downregulated	5	2.89709	0.0552	upregulated	19	7.19666	0.0007	downregulated	13	2.9806	0.0508	upregulated	1	3.83024	0.0217
cellular response to sterol	GO	2 out of 7	0.829529	upregulated	1	1.78279	0.1682									downregulated	1	1.27599	0.2792	upregulated	4	3.89557	0.0203	downregulated	2	2.55924	0.0774
phosphatidylcholine acyl-chain remodeling	GO	2 out of 7	0.825745					downregulated	1	1.05205	0.3492	downregulated	1	1.13054	0.3229	downregulated	1	0.721344	0.4861	upregulated	2	0.636245	0.5293	downregulated	1	1.02614	0.3584
regulation of leukocyte mediated cytotoxicity	GO	1 out of 7	0.814306	downregulated	2	1.68815	0.1849					downregulated	9	6.5188	0.0015	downregulated	7	7.7966	0.0004	upregulated	11	4.63065	0.0097	upregulated	2	0.814306	0.4429
regulation of phosphorylation of RNA polymerase II C-terminal domain	GO	1 out of 7	0.812368																	downregulated	2	1.06393	0.3451	upregulated	1	1.8763	0.1532
neuron fate specification	GO	1 out of 7	0.805735									downregulated	3	2.25445	0.1049					upregulated	5	4.03836	0.0176	downregulated	1	1.44871	0.2349
oxidoreductase activity, acting on paired donors, with incorporation or reduction of molecular oxygen, reduced flavin or flavoprotein as one donor, and incorporation of one atom of oxygen	GO	2 out of 7	0.802803	downregulated	1	1.11047	0.3294					downregulated	1	0.772558	0.4618					downregulated	3	1.08022	0.3395
DNA methylation	GO	1 out of 7	0.783832	downregulated	1	0.658603	0.5176	upregulated	1	0.352286	0.7031	downregulated	3	0.956975	0.3841	downregulated	3	2.2595	0.1044	upregulated	3	1.87538	0.1533	upregulated	2	0.783832	0.4567
response to pH	GO	4 out of 7	0.776848	downregulated	1	5.8089	0.003	upregulated	1	1.84783	0.1576	downregulated	2	2.33112	0.0972	downregulated	1	4.01812	0.018	downregulated	11	5.8089	0.003	downregulated	7	6.34999	0.0017	upregulated	1	2.62543	0.0724
regulation of mesoderm development	GO	2 out of 7	0.733925	upregulated	2	2.61909	0.0729	downregulated	1	1.89971	0.1496	upregulated	1	0.943375	0.3893					upregulated	2	2.39668	0.091
histone H3-K4 trimethylation	GO	3 out of 7	0.725102	upregulated	1	0.707958	0.4926	upregulated	1	0.678656	0.5073	downregulated	1	0.497772	0.6079	downregulated	1	0.940783	0.3903	downregulated	3	1.65395	0.1913	upregulated	2	2.32711	0.0976
U12-type spliceosomal complex	GO	1 out of 7	0.716819					upregulated	3	3.63204	0.0265	upregulated	1	1.7117	0.1806	downregulated	1	0.750303	0.4722	upregulated	4	2.56917	0.0766	upregulated	1	0.716819	0.4883
muscle cell cellular homeostasis	GO	2 out of 7	0.68421									downregulated	2	5.28472	0.0051	downregulated	1	3.40074	0.0333	downregulated	5	3.03636	0.048	downregulated	4	4.96489	0.007
negative regulation of execution phase of apoptosis	GO	2 out of 7	0.674205	upregulated	1	3.10546	0.0448					downregulated	2	2.14375	0.1172	downregulated	2	3.02421	0.0486	downregulated	1	0.0985304	0.9062	downregulated	1	1.28976	0.2753
protein localization to endosome	GO	4 out of 7	0.669053	downregulated	1	2.80853	0.0603	downregulated	1	1.594	0.2031	downregulated	1	0.6967	0.4982	downregulated	1	1.3244	0.266	downregulated	3	3.86301	0.021	downregulated	1	1.89156	0.1508
U2-type spliceosomal complex	GO	1 out of 7	0.633185	upregulated	2	2.03378	0.1308	upregulated	6	3.96377	0.019	upregulated	2	1.99	0.1367	downregulated	2	0.456419	0.6335	downregulated	11	2.46744	0.0848	upregulated	3	0.633185	0.5309
nuclear pore nuclear basket	GO	2 out of 7	0.631975													downregulated	1	1.19715	0.3021	upregulated	1	0.273676	0.7606	downregulated	1	0.838848	0.4322
determination of heart left/right asymmetry	GO	4 out of 7	0.626974	upregulated	7	5.76321	0.0031	downregulated	2	3.0437	0.0477	downregulated	3	3.39102	0.0337	downregulated	2	1.25902	0.2839	downregulated	8	3.80816	0.0222	upregulated	1	2.50462	0.0817
positive regulation of autophagy of mitochondrion in response to mitochondrial depolarization	GO	3 out of 7	0.602243	downregulated	1	1.75978	0.1721					downregulated	2	1.59946	0.202	downregulated	1	1.22625	0.2934	downregulated	1	0.943265	0.3894	downregulated	3	3.98325	0.0186
L-ascorbic acid binding	GO	4 out of 7	0.581798	downregulated	1	2.08746	0.124	upregulated	3	4.04768	0.0175	downregulated	1	1.27427	0.2796	downregulated	1	0.889479	0.4109	upregulated	2	1.80237	0.1649	downregulated	2	1.42409	0.2407
snoRNA binding	GO	2 out of 7	0.575784	upregulated	1	0.390694	0.6766	downregulated	2	2.0679	0.1265									downregulated	8	1.43383	0.2384	upregulated	1	0.332404	0.7172
site of double-strand break	GO	3 out of 7	0.557454	upregulated	3	1.29758	0.2732	upregulated	3	1.60264	0.2014	upregulated	1	0.382569	0.6821	downregulated	4	3.1538	0.0427	upregulated	2	0.37832	0.685	upregulated	1	0.308123	0.7348
cytoplasmic translational initiation	GO	2 out of 7	0.556543									downregulated	2	1.07646	0.3408	downregulated	2	3.24081	0.0391	downregulated	4	1.54454	0.2134	downregulated	2	2.21619	0.109
regulation of Wnt signaling pathway, planar cell polarity pathway	GO	2 out of 7	0.544949	upregulated	1	2.14805	0.1167					downregulated	1	0.776888	0.4598					upregulated	2	2.63407	0.0718	downregulated	1	0.717964	0.4877
carbon-sulfur lyase activity	GO	2 out of 7	0.536548	upregulated	1	1.4611	0.232	upregulated	1	1.286	0.2764	downregulated	1	4.33488	0.0131	downregulated	1	5.24738	0.0053	downregulated	3	3.54927	0.0287	downregulated	2	2.74934	0.064
bundle of His cell to Purkinje myocyte communication	GO	2 out of 7	0.521726	upregulated	1	2.15716	0.1157					downregulated	1	1.32927	0.2647	downregulated	1	3.00084	0.0497	upregulated	1	1.2419	0.2888	downregulated	1	1.65122	0.1918
ventral spinal cord development	GO	3 out of 7	0.503963					upregulated	1	1.80114	0.1651	downregulated	3	1.39821	0.247	downregulated	1	0.239384	0.7871	upregulated	6	2.70049	0.0672	downregulated	4	2.03298	0.1309
MLL1/2 complex	GO	3 out of 7	0.503104	upregulated	2	0.973401	0.3778					downregulated	2	0.541042	0.5821	downregulated	3	2.42113	0.0888	upregulated	5	1.20863	0.2986	downregulated	4	2.69429	0.0676
Wnt signaling pathway involved in midbrain dopaminergic neuron differentiation	GO	1 out of 7	0.489755																	upregulated	1	0.489755	0.6128
neurexin family protein binding	GO	2 out of 7	0.482622	upregulated	1	1.40707	0.2449	upregulated	1	4.32254	0.0133	upregulated	1	1.96962	0.1395					upregulated	1	4.21789	0.0147	upregulated	1	3.96397	0.019
semaphorin-plexin signaling pathway involved in axon guidance	GO	2 out of 7	0.482386	downregulated	1	2.72177	0.0658					downregulated	3	2.81046	0.0602					downregulated	1	1.12994	0.3231	downregulated	3	5.04985	0.0064
cell death in response to oxidative stress	GO	3 out of 7	0.47817	downregulated	1	0.950045	0.3867	downregulated	1	1.88072	0.1525	upregulated	1	0.969023	0.3795					upregulated	4	2.34032	0.0963	downregulated	4	3.72389	0.0241
cysteine-type endopeptidase inhibitor activity involved in apoptotic process	GO	2 out of 7	0.451229	upregulated	2	1.10745	0.3304					downregulated	1	0.819556	0.4406	downregulated	2	1.96068	0.1408	downregulated	1	1.22156	0.2948
replication fork	GO	1 out of 7	0.434117	upregulated	4	2.38265	0.0923	upregulated	4	2.06507	0.1268	downregulated	4	0.745568	0.4745	downregulated	4	1.67351	0.1876	upregulated	5	2.04627	0.1292	upregulated	1	0.434117	0.6478
arginine metabolic process	GO	1 out of 7	0.418101									upregulated	1	1.90991	0.1481					downregulated	3	1.21427	0.2969	upregulated	2	2.32801	0.0975
establishment of protein localization to endoplasmic reticulum	GO	1 out of 7	0.391817	upregulated	3	0.0736638	0.929	downregulated	1	2.36038	0.0944	upregulated	2	0.200435	0.8184	upregulated	1	1.15826	0.314	downregulated	11	0.080496	0.9227	downregulated	2	0.455713	0.634
negative regulation of locomotion	GO	4 out of 7	0.384274	upregulated	20	6.04008	0.0024	upregulated	11	4.08111	0.0169	downregulated	31	6.43064	0.0016	downregulated	15	5.40643	0.0045	upregulated	41	6.31718	0.0018	downregulated	30	8.25731	0.0003	upregulated	1	0.608517	0.5442
actin filament bundle organization	GO	2 out of 7	0.380752	downregulated	1	1.45111	0.2343	upregulated	5	4.44805	0.0117	upregulated	2	0.951353	0.3862	upregulated	3	2.95589	0.052	upregulated	15	12.1303	5.4e-06	downregulated	9	4.84537	0.0079
DNA catabolic process	GO	1 out of 7	0.373945	upregulated	1	0.258468	0.7722	upregulated	2	3.58979	0.0276	downregulated	3	1.01607	0.362	downregulated	1	0.427207	0.6523	downregulated	3	0.505215	0.6034	upregulated	1	0.373945	0.688
regulation of anoikis	GO	3 out of 7	0.339074	upregulated	2	3.19872	0.0408	upregulated	3	5.34922	0.0048	upregulated	2	1.60508	0.2009	downregulated	1	0.406437	0.666	upregulated	4	5.62895	0.0036	downregulated	2	1.07734	0.3405	upregulated	1	5.53405	0.0039
methyl-CpG binding	GO	2 out of 7	0.33686	upregulated	1	0.463097	0.6293					upregulated	1	1.14594	0.3179					upregulated	1	0.7263	0.4837	upregulated	2	1.2196	0.2953
motile cilium assembly	GO	2 out of 7	0.295771	upregulated	1	0.584454	0.5574					upregulated	1	1.16088	0.3132	upregulated	1	1.93216	0.1448	upregulated	3	2.40599	0.0902	upregulated	1	1.56727	0.2086
transcription factor activity, direct ligand regulated sequence-specific DNA binding	GO	4 out of 7	0.291526	downregulated	3	1.73583	0.1763	downregulated	2	2.14088	0.1176	downregulated	2	0.0724494	0.9301	upregulated	2	3.68353	0.0251	upregulated	8	3.2038	0.0406	downregulated	4	3.1779	0.0417
positive regulation of lymphocyte migration	GO	2 out of 7	0.280244									upregulated	1	1.92715	0.1456	downregulated	3	3.77409	0.023	downregulated	5	3.29121	0.0372	upregulated	1	1.72452	0.1783
ceramide binding	GO	2 out of 7	0.279803	upregulated	1	0.843731	0.4301					downregulated	2	3.77473	0.0229	downregulated	1	1.72166	0.1788	downregulated	4	2.13485	0.1183	downregulated	2	2.238	0.1067
omega-hydroxylase P450 pathway	GO	1 out of 7	0.256972																	upregulated	1	0.256972	0.7734
response to BMP	GO	3 out of 7	0.24946	upregulated	9	6.84686	0.0011	downregulated	1	2.46505	0.085	upregulated	5	1.90962	0.1481	upregulated	2	3.01651	0.049	upregulated	15	8.42307	0.0002	downregulated	4	0.63635	0.5292	upregulated	1	1.77067	0.1702
cellular response to BMP stimulus	GO	3 out of 7	0.24946	upregulated	9	6.84686	0.0011	downregulated	1	2.46505	0.085	upregulated	5	1.90962	0.1481	upregulated	2	3.01651	0.049	upregulated	15	8.42307	0.0002	downregulated	4	0.63635	0.5292	upregulated	1	1.77067	0.1702
ubiquitin-like modifier activating enzyme activity	GO	1 out of 7	0.235936					downregulated	1	1.60867	0.2002									downregulated	2	1.37273	0.2534
negative regulation of glycoprotein metabolic process	GO	3 out of 7	0.214276	downregulated	1	3.78003	0.0228	upregulated	1	1.90649	0.1486	upregulated	1	2.26571	0.1038	downregulated	1	0.983362	0.3741	upregulated	1	0.885427	0.4125	downregulated	1	1.26235	0.283
reciprocal meiotic recombination	GO	2 out of 7	0.152138	upregulated	2	0.951561	0.3861	upregulated	3	1.79158	0.1667	downregulated	2	1.34121	0.2615	downregulated	2	2.36823	0.0936	downregulated	6	0.456079	0.6338	downregulated	2	0.814163	0.443
TRAPP complex	GO	3 out of 7	0.145418					downregulated	1	1.68089	0.1862	downregulated	1	1.68173	0.1861	downregulated	1	1.99121	0.1365	downregulated	6	4.20452	0.0149	downregulated	1	1.0039	0.3664
cyclin-dependent protein kinase activity	GO	3 out of 7	0.122736	upregulated	4	1.72472	0.1782	downregulated	3	5.55838	0.0039	downregulated	4	3.02085	0.0488	downregulated	1	0.388608	0.678	downregulated	7	1.85014	0.1572	downregulated	7	5.27024	0.0051
rRNA binding	GO	3 out of 7	0.119929	upregulated	2	0.220124	0.8024	upregulated	2	0.972176	0.3783	downregulated	4	1.07741	0.3405	downregulated	3	1.14261	0.319	upregulated	5	0.231733	0.7932	downregulated	5	1.13952	0.32
interleukin-12-mediated signaling pathway	GO	3 out of 7	0.0912408	upregulated	3	2.32264	0.098	downregulated	1	3.69316	0.0249	downregulated	7	3.15215	0.0428	downregulated	4	4.6157	0.0099	downregulated	11	5.09514	0.0061	downregulated	4	3.95199	0.0192
toxic substance binding	GO	1 out of 7	0.0850973	downregulated	1	2.36425	0.094																	downregulated	2	2.27915	0.1024
execution phase of apoptosis	GO	3 out of 7	0.0749872	upregulated	3	1.15111	0.3163	upregulated	3	2.86257	0.0571	downregulated	5	2.24834	0.1056	downregulated	1	0.197854	0.8205	upregulated	6	2.03404	0.1308	downregulated	2	0.391561	0.676
ligase activity, forming carbon-nitrogen bonds	GO	3 out of 7	0.0477559	downregulated	1	0.398659	0.6712	upregulated	4	2.98091	0.0507	upregulated	3	2.77131	0.0626	downregulated	2	2.62612	0.0724	downregulated	9	0.828051	0.4369	upregulated	5	3.60325	0.0272
organic hydroxy compound metabolic process	GO	3 out of 7	0.0296245	downregulated	9	3.36714	0.0345	upregulated	15	4.08788	0.0168	downregulated	31	11.2645	1.3e-05	downregulated	27	13.961	8.6e-07	downregulated	83	14.915	3.3e-07	downregulated	36	9.56011	7e-05
