# Supplementary material for: Physical Activity Rewires the Human Brain against Neurodegeneration
Source: Int J Mol Sci. 2022 Jun 2;23(11):6223. doi: 10.3390/ijms23116223 (PMC9181322; doi:10.3390/ijms23116223)
Supplement: Supplementary file 1 [file ijms-23-06223-s001.zip › Table S10.xlsx]

## Sheet: Sheet1
Table S10. Functional analysis of genes upregulated in physically active subjects and downregulated in Frontotemporal dementia datasets
Bioset 1: Hippocampi from 76-99yr old female subjects with high physical activity levels _vs_ low (Study: Hippocampi from post-mortem brains of subjects with low, moderate, or high physical activity levels)
Bioset 2: Hippocampi from 76-99yr old female subjects with moderate physical activity levels _vs_ low (Study: Hippocampi from post-mortem brains of subjects with low, moderate, or high physical activity levels)
Bioset 3: Hippocampi from 78-101yr old male subjects with high physical activity levels _vs_ low (Study: Hippocampi from post-mortem brains of subjects with low, moderate, or high physical activity levels)
Bioset 4: Hippocampi from 78-101yr old male subjects with moderate physical activity levels _vs_ low (Study: Hippocampi from post-mortem brains of subjects with low, moderate, or high physical activity levels)
Bioset 5: Hippocampi - FTLD-U patients with GRN mutations _vs_ normal subjects (Study: Frontal cortices, hippocampi and cerebella of patients with frontotemporal lobar degeneration)
Bioset 6: Hippocampi - FTLD-U patients without GRN mutations _vs_ normal subjects (Study: Frontal cortices, hippocampi and cerebella of patients with frontotemporal lobar degeneration)
Biogroup	Source	Specificity	Overall Biogroup score	Correlated direction - Bioset 1	Common genes - Bioset 1	Score - Bioset 1	p-value - Bioset 1	Correlated direction - Bioset 2	Common genes - Bioset 2	Score - Bioset 2	p-value - Bioset 2	Correlated direction - Bioset 3	Common genes - Bioset 3	Score - Bioset 3	p-value - Bioset 3	Correlated direction - Bioset 4	Common genes - Bioset 4	Score - Bioset 4	p-value - Bioset 4	Correlated direction - Bioset 5	Common genes - Bioset 5	Score - Bioset 5	p-value - Bioset 5	Correlated direction - Bioset 6	Common genes - Bioset 6	Score - Bioset 6	p-value - Bioset 6
mitochondrial inner membrane	GO	2 out of 6	66.6702	upregulated	27	5.62562	0.0036	upregulated	15	5.36053	0.0047	upregulated	10	1.51302	0.2202	upregulated	2	0.351718	0.7035	downregulated	51	57.3373	1.3e-25	downregulated	15	9.33287	8.8e-05
ATP metabolic process	GO	4 out of 6	60.402	upregulated	7	0.835279	0.4338	downregulated	3	1.35707	0.2574	upregulated	5	2.20918	0.1098	downregulated	2	0.168818	0.8447	downregulated	30	49.5673	3e-22	downregulated	10	9.31609	9e-05
generation of precursor metabolites and energy	GO	2 out of 6	59.6866	upregulated	11	1.24741	0.2872	upregulated	15	3.42172	0.0327	upregulated	11	4.0725	0.017	downregulated	12	1.71244	0.1804	downregulated	45	50.6361	1e-22	downregulated	15	9.05052	0.0001
cellular respiration	GO	5 out of 6	58.9939	upregulated	8	1.64558	0.1929	upregulated	8	3.79241	0.0225	upregulated	4	1.81115	0.1635	downregulated	3	1.32457	0.2659	downregulated	26	42.0784	5.3e-19	downregulated	9	10.9909	1.7e-05
synaptic signaling	GO	4 out of 6	57.3097	upregulated	43	41.3164	1.1e-18	downregulated	4	1.08021	0.3395	upregulated	22	10.8215	2e-05	upregulated	4	4.28855	0.0137	upregulated	14	1.49989	0.2232	downregulated	8	1.96351	0.1404
oxidative phosphorylation	GO	2 out of 6	57.0532	upregulated	4	1.05577	0.3479	upregulated	3	1.17225	0.3097	upregulated	2	0.709627	0.4918					downregulated	24	47.7639	1.8e-21	downregulated	7	9.28923	9.2e-05
chemical synaptic transmission	GO	5 out of 6	56.8888	upregulated	42	38.9629	1.2e-17	downregulated	4	1.13052	0.3229	upregulated	21	11.0061	1.7e-05	upregulated	4	4.4174	0.0121	downregulated	10	1.5182	0.2191	downregulated	8	2.11471	0.1207
mitochondrion organization	GO	5 out of 6	54.9051	downregulated	9	1.36513	0.2553	upregulated	13	1.95798	0.1411	upregulated	15	4.07223	0.017	upregulated	3	1.15322	0.3156	downregulated	45	39.0496	1.1e-17	downregulated	15	8.6721	0.0002
mitochondrial respiratory chain	GO	2 out of 6	53.668	upregulated	5	1.93906	0.1438	upregulated	3	1.19407	0.303	upregulated	1	0.759201	0.468	downregulated	1	0.339459	0.7122	downregulated	22	44.1317	6.8e-20	downregulated	7	9.53631	7.2e-05
energy derivation by oxidation of organic compounds	GO	5 out of 6	48.7321	upregulated	10	1.73062	0.1772	upregulated	9	2.75961	0.0633	upregulated	6	2.32004	0.0983	downregulated	7	2.04293	0.1296	downregulated	27	33.8605	2e-15	downregulated	11	10.1042	4.1e-05
ATP synthesis coupled electron transport	GO	5 out of 6	47.6735	upregulated	4	1.35502	0.2579	upregulated	3	1.4678	0.2304	upregulated	2	0.813859	0.4431					downregulated	17	36.0026	2.3e-16	downregulated	6	8.03422	0.0003
oxidoreductase complex	GO	3 out of 6	46.1784	upregulated	5	1.29046	0.2751	downregulated	2	1.98668	0.1372	downregulated	6	2.27157	0.1032	downregulated	3	3.00511	0.0495	downregulated	23	42.4729	3.6e-19	downregulated	8	9.67835	6.3e-05
respiratory chain complex I	GO	3 out of 6	44.37	upregulated	3	1.59216	0.2035	downregulated	1	1.56139	0.2098									downregulated	15	36.1241	2e-16	downregulated	5	8.21515	0.0003
mitochondrial respiratory chain complex I	GO	2 out of 6	44.3392	upregulated	3	1.59216	0.2035	downregulated	1	1.56139	0.2098									downregulated	15	36.1241	2e-16	downregulated	5	8.21515	0.0003
mitochondrial electron transport, NADH to ubiquinone	GO	2 out of 6	43.6868	upregulated	2	1.00306	0.3668	downregulated	1	1.73564	0.1763									downregulated	14	37.438	5.5e-17	downregulated	4	6.24882	0.0019
mitochondrial matrix	GO	2 out of 6	42.8406	upregulated	31	4.02122	0.0179	upregulated	22	6.25153	0.0019	upregulated	18	3.42549	0.0325	upregulated	3	0.56279	0.5696	downregulated	44	32.8297	5.5e-15	downregulated	16	10.0108	4.5e-05
regulation of membrane potential	GO	5 out of 6	36.0216	upregulated	25	18.3535	1.1e-08	downregulated	8	2.94568	0.0526	upregulated	23	7.99584	0.0003	upregulated	6	4.20939	0.0149	downregulated	17	2.61119	0.0734	downregulated	13	5.79735	0.003
postsynapse	GO	3 out of 6	34.7816	upregulated	39	19.9728	2.1e-09	downregulated	11	1.62425	0.1971	upregulated	34	15.0247	3e-07	upregulated	12	8.49143	0.0002	upregulated	31	3.58725	0.0277	upregulated	19	3.49587	0.0303
oxidoreductase activity, acting on NAD(P)H, quinone or similar compound as acceptor	GO	3 out of 6	34.2442	upregulated	2	0.592191	0.5531	downregulated	1	1.41001	0.2441	downregulated	3	0.640367	0.5271	downregulated	3	2.9138	0.0543	downregulated	14	33.1874	3.9e-15	downregulated	4	5.4288	0.0044
synaptic membrane	GO	3 out of 6	33.9125	upregulated	28	15.4912	1.9e-07	downregulated	5	0.373244	0.6885	upregulated	25	14.7116	4.1e-07	upregulated	9	9.55228	7.1e-05	upregulated	18	2.44882	0.0864	upregulated	11	3.02061	0.0488
transmembrane transporter complex	GO	5 out of 6	30.4263	upregulated	24	21.1646	6.4e-10	downregulated	7	1.49227	0.2249	upregulated	11	4.43845	0.0118	upregulated	1	2.22299	0.1083	downregulated	7	1.60543	0.2008	downregulated	5	2.48708	0.0832
proton transmembrane transport	GO	6 out of 6	30.3953	upregulated	6	2.0059	0.1345	upregulated	4	1.36635	0.255	upregulated	5	2.22488	0.1081	upregulated	2	1.63735	0.1945	downregulated	16	19.8894	2.3e-09	downregulated	4	3.27146	0.038
vitamin binding	GO	6 out of 6	30.3094	upregulated	5	4.32797	0.0132	upregulated	8	6.68239	0.0013	upregulated	8	5.23432	0.0053	upregulated	3	2.97664	0.051	downregulated	8	5.5166	0.004	downregulated	7	5.57143	0.0038
electron transfer activity	GO	4 out of 6	30.1169	downregulated	2	3.06658	0.0466	upregulated	8	5.70725	0.0033	upregulated	5	4.90936	0.0074	downregulated	4	2.77969	0.0621	downregulated	16	18.6167	8.2e-09	downregulated	3	3.95012	0.0193
postsynaptic membrane	GO	3 out of 6	30.1138	upregulated	23	13.0835	2.1e-06	downregulated	5	0.78012	0.4584	upregulated	22	15.8199	1.3e-07	upregulated	8	8.6607	0.0002	upregulated	16	3.32356	0.036	upregulated	10	3.3466	0.0352
postsynaptic density	GO	3 out of 6	28.5019	upregulated	21	13.8338	9.8e-07	downregulated	6	1.18682	0.3052	upregulated	24	16.8327	4.9e-08	upregulated	7	4.19419	0.0151	upregulated	15	3.59983	0.0273	upregulated	10	5.17199	0.0057
postsynaptic specialization	GO	3 out of 6	28.3196	upregulated	21	13.726	1.1e-06	downregulated	6	1.17088	0.3101	upregulated	24	16.7112	5.5e-08	upregulated	7	4.16369	0.0156	upregulated	15	3.51881	0.0296	upregulated	10	5.11039	0.006
oxidoreductase activity, acting on NAD(P)H	GO	3 out of 6	27.9576	upregulated	3	0.346596	0.7071	upregulated	2	0.874883	0.4169	downregulated	8	1.65996	0.1901	downregulated	7	5.16653	0.0057	downregulated	16	29.981	9.5e-14	downregulated	5	4.45645	0.0116
asymmetric synapse	GO	3 out of 6	27.6909	upregulated	21	13.4083	1.5e-06	downregulated	6	1.1243	0.3249	upregulated	24	16.3527	7.9e-08	upregulated	7	4.07378	0.017	upregulated	16	3.40043	0.0334	upregulated	10	5.01966	0.0066
coenzyme binding	GO	5 out of 6	27.5639	upregulated	10	0.492943	0.6108	upregulated	20	10.2981	3.4e-05	upregulated	12	5.27765	0.0051	upregulated	7	9.42874	8e-05	downregulated	18	6.19691	0.002	upregulated	15	4.13043	0.0161
regulation of synapse assembly	GO	5 out of 6	27.3073	upregulated	14	16.1358	9.8e-08	upregulated	2	1.1051	0.3312	upregulated	6	6.43178	0.0016	upregulated	3	4.27625	0.0139	downregulated	2	1.51392	0.22	upregulated	4	2.15554	0.1158
cofactor binding	GO	4 out of 6	26.8311	downregulated	10	1.21295	0.2973	upregulated	25	7.89361	0.0004	upregulated	17	4.46405	0.0115	upregulated	8	6.47206	0.0015	downregulated	30	9.20667	0.0001	downregulated	17	6.4797	0.0015
guanyl nucleotide binding	GO	5 out of 6	25.6046	upregulated	22	6.45466	0.0016	upregulated	17	2.27886	0.1024	upregulated	18	5.20735	0.0055	upregulated	3	1.8241	0.1614	downregulated	19	7.79734	0.0004	downregulated	6	3.86636	0.0209
ATP synthesis coupled proton transport	GO	2 out of 6	25.5956																	downregulated	7	19.7766	2.6e-09	downregulated	2	5.819	0.003
memory	GO	6 out of 6	25.5637	upregulated	5	5.34556	0.0048	upregulated	3	2.41923	0.089	upregulated	7	4.02848	0.0178	upregulated	4	6.02831	0.0024	downregulated	5	4.68726	0.0092	downregulated	2	3.05489	0.0471
proton-transporting ATP synthase complex	GO	5 out of 6	24.7258	upregulated	1	1.95504	0.1416	upregulated	1	2.96451	0.0516	upregulated	1	2.90512	0.0547					downregulated	5	14.4118	5.5e-07	downregulated	1	2.48927	0.083
mitochondrial gene expression	GO	5 out of 6	24.5744	upregulated	11	4.06515	0.0172	upregulated	7	2.94399	0.0527	upregulated	6	2.15579	0.1158	downregulated	4	1.8924	0.1507	downregulated	13	11.4643	1e-05	downregulated	5	5.83756	0.0029
respiratory chain complex IV	GO	3 out of 6	23.8211					upregulated	1	1.03225	0.3562									downregulated	6	17.9207	1.6e-08	downregulated	2	4.86812	0.0077
regulation of synapse structure or activity	GO	5 out of 6	23.5417	upregulated	18	11.0633	1.6e-05	downregulated	5	2.47436	0.0842	upregulated	8	4.72274	0.0089	upregulated	6	7.19365	0.0008	downregulated	5	1.53584	0.2153	downregulated	3	1.50045	0.223
presynapse	GO	5 out of 6	23.5064	upregulated	30	17.415	2.7e-08	upregulated	5	1.03527	0.3551	downregulated	17	3.05633	0.0471	upregulated	2	3.11245	0.0445	downregulated	10	2.04323	0.1296	downregulated	8	2.95683	0.052
exocytic vesicle membrane	GO	5 out of 6	23.2102	upregulated	12	14.8156	3.7e-07	downregulated	1	0.163223	0.8494	upregulated	3	0.860862	0.4228	upregulated	1	2.50977	0.0813	downregulated	4	3.06805	0.0465	downregulated	2	2.11913	0.1201
methylation	GO	5 out of 6	22.2143	upregulated	22	3.72058	0.0242	upregulated	24	10.5653	2.6e-05	upregulated	7	2.50254	0.0819	upregulated	3	6.0163	0.0024	downregulated	7	1.28486	0.2767	upregulated	9	1.87537	0.1533
cilium organization	GO	5 out of 6	22.0377	upregulated	28	7.18773	0.0008	upregulated	25	10.4411	2.9e-05	upregulated	11	1.44366	0.2361	upregulated	3	0.707268	0.493	downregulated	11	3.6437	0.0262	upregulated	9	1.38575	0.2501
methyltransferase activity	GO	5 out of 6	22.0145	upregulated	15	2.50005	0.0821	upregulated	18	9.94636	4.8e-05	upregulated	7	3.74503	0.0236	upregulated	3	6.71306	0.0012	downregulated	3	0.630921	0.5321	upregulated	6	1.52091	0.2185
lyase activity	GO	5 out of 6	21.8549	upregulated	9	4.99695	0.0068	upregulated	8	2.73935	0.0646	upregulated	9	5.39768	0.0045	upregulated	4	4.9939	0.0068	downregulated	11	6.51889	0.0015	upregulated	9	2.79188	0.0613
tricarboxylic acid cycle enzyme complex	GO	4 out of 6	21.7623	upregulated	1	0.892299	0.4097	upregulated	1	2.25153	0.1052									downregulated	5	11.3364	1.2e-05	downregulated	3	7.28212	0.0007
regulation of synapse organization	GO	4 out of 6	21.6743	upregulated	18	11.5014	1e-05	downregulated	4	2.50352	0.0818	upregulated	8	4.89487	0.0075	upregulated	6	7.35095	0.0006	downregulated	4	1.58739	0.2045	upregulated	5	1.15686	0.3145
proton-transporting two-sector ATPase complex	GO	5 out of 6	21.333	upregulated	2	1.07977	0.3397	upregulated	1	1.90614	0.1487	upregulated	1	1.6954	0.1835	downregulated	1	0.387871	0.6785	downregulated	7	13.3193	1.6e-06	downregulated	2	3.72023	0.0242
anchored component of membrane	GO	4 out of 6	21.2287	upregulated	6	5.01113	0.0067	upregulated	1	0.20195	0.8171	upregulated	10	11.5408	9.7e-06	upregulated	5	7.53952	0.0005	upregulated	4	0.978155	0.376	upregulated	3	2.08652	0.1241
ribosome binding	GO	6 out of 6	21.159	upregulated	1	0.0872456	0.9165	upregulated	3	2.36272	0.0942	upregulated	7	9.74077	5.9e-05	upregulated	2	3.34655	0.0352	downregulated	4	3.64976	0.026	downregulated	2	1.97193	0.1392
neurotransmitter receptor activity	GO	5 out of 6	20.9141	upregulated	7	10.1093	4.1e-05	downregulated	1	1.52399	0.2178	upregulated	4	7.15034	0.0008	upregulated	1	3.45706	0.0315	downregulated	2	0.664562	0.5145	downregulated	1	1.05684	0.3476
unfolded protein binding	GO	4 out of 6	20.2711	upregulated	5	1.50343	0.2224	upregulated	3	1.93852	0.1439	downregulated	6	0.851469	0.4268	downregulated	2	0.355616	0.7007	downregulated	9	11.8889	6.9e-06	downregulated	5	6.1473	0.0021
modulation of excitatory postsynaptic potential	GO	5 out of 6	20.2514	upregulated	3	3.69438	0.0249	downregulated	2	3.64562	0.0261	upregulated	4	5.37591	0.0046	upregulated	4	9.51692	7.4e-05	downregulated	2	2.04445	0.1295	downregulated	2	3.26535	0.0382
regulation of neurological system process	GO	5 out of 6	20.2487	upregulated	5	5.57161	0.0038	downregulated	2	2.77053	0.0626	upregulated	7	5.24991	0.0052	upregulated	5	8.45392	0.0002	downregulated	2	1.08422	0.3382	downregulated	3	2.65961	0.07
peptide biosynthetic process	GO	6 out of 6	20.1815	upregulated	15	0.191373	0.8258	upregulated	18	4.95421	0.0071	upregulated	14	1.57218	0.2076	upregulated	5	1.38466	0.2504	downregulated	26	10.3744	3.1e-05	downregulated	7	1.70462	0.1818
circadian behavior	GO	5 out of 6	20.1067	upregulated	2	3.95866	0.0191					upregulated	2	3.26789	0.0381	upregulated	2	6.02297	0.0024	downregulated	3	3.38674	0.0338	downregulated	2	3.47049	0.0311
GABA-A receptor complex	GO	3 out of 6	20.0968	upregulated	4	10.4368	2.9e-05					upregulated	1	4.60993	0.01	upregulated	1	5.05002	0.0064
rhythmic behavior	GO	5 out of 6	19.8627	upregulated	2	3.92284	0.0198					upregulated	2	3.23325	0.0394	upregulated	2	5.9854	0.0025	downregulated	3	3.30761	0.0366	downregulated	2	3.41357	0.0329
GABA receptor complex	GO	3 out of 6	19.7421	upregulated	4	10.2766	3.4e-05					upregulated	1	4.51277	0.011	upregulated	1	4.95268	0.0071
learning or memory	GO	6 out of 6	19.7409	upregulated	12	6.58619	0.0014	upregulated	7	1.44714	0.2352	upregulated	10	2.49184	0.0828	upregulated	4	3.84481	0.0214	downregulated	8	3.14048	0.0433	downregulated	4	2.23042	0.1075
iron-sulfur cluster binding	GO	4 out of 6	19.6816	upregulated	3	1.10913	0.3298	upregulated	1	4.1292	0.0161	downregulated	6	1.88932	0.1512	downregulated	3	1.57767	0.2065	downregulated	10	13.6284	1.2e-06	downregulated	3	4.28188	0.0138
negative regulation of vascular smooth muscle cell proliferation	GO	5 out of 6	19.5422	upregulated	3	8.42688	0.0002					upregulated	2	2.62938	0.0721	upregulated	1	3.29365	0.0371	downregulated	1	2.42679	0.0883	downregulated	1	2.7655	0.0629
protein-DNA complex assembly	GO	3 out of 6	18.9359	upregulated	18	7.79699	0.0004	upregulated	17	10.9371	1.8e-05	downregulated	11	0.997247	0.3689	upregulated	3	2.94951	0.0524	upregulated	12	1.12087	0.326	upregulated	6	0.629572	0.5328
hormone binding	GO	6 out of 6	18.7031	upregulated	2	2.18159	0.1129	upregulated	2	2.16227	0.1151	upregulated	5	3.75172	0.0235	upregulated	4	6.44646	0.0016	downregulated	4	1.65017	0.192	downregulated	3	2.51089	0.0812
ATP hydrolysis coupled cation transmembrane transport	GO	3 out of 6	18.5549	downregulated	1	0.323325	0.7237					upregulated	2	0.746013	0.4743					downregulated	9	15.6549	1.6e-07	downregulated	2	2.47733	0.084
postsynaptic density organization	GO	4 out of 6	18.3841	upregulated	2	4.34383	0.013					upregulated	2	4.5912	0.0101	upregulated	2	6.00499	0.0025	downregulated	1	3.44406	0.0319
chaperone complex	GO	3 out of 6	18.3018					upregulated	1	2.34827	0.0955									downregulated	7	14.2614	6.4e-07	downregulated	1	1.69217	0.1841
channel regulator activity	GO	4 out of 6	18.0041	upregulated	15	14.9566	3.2e-07	upregulated	4	3.37356	0.0343	upregulated	2	1.02801	0.3577	downregulated	2	0.210597	0.8101	downregulated	2	0.613997	0.5412	upregulated	4	1.75743	0.1725
regulation of hormone secretion	GO	6 out of 6	17.9196	upregulated	9	2.12311	0.1197	upregulated	9	1.18763	0.3049	upregulated	14	3.62545	0.0266	upregulated	5	2.91102	0.0544	downregulated	5	3.87512	0.0208	downregulated	7	4.1973	0.015
ATP hydrolysis coupled transmembrane transport	GO	4 out of 6	17.7627	downregulated	2	1.22149	0.2948	upregulated	1	0.110595	0.8953	upregulated	2	0.724206	0.4847					downregulated	9	15.6549	1.6e-07	downregulated	2	2.49449	0.0825
ATP hydrolysis coupled ion transmembrane transport	GO	4 out of 6	17.7627	downregulated	2	1.22149	0.2948	upregulated	1	0.110595	0.8953	upregulated	2	0.724206	0.4847					downregulated	9	15.6549	1.6e-07	downregulated	2	2.49449	0.0825
tricarboxylic acid metabolic process	GO	4 out of 6	17.7393	upregulated	2	0.693252	0.4999					upregulated	3	3.21846	0.04					downregulated	6	10.2583	3.5e-05	downregulated	2	3.56928	0.0282
positive regulation of excitatory postsynaptic potential	GO	5 out of 6	17.6825	upregulated	3	4.69189	0.0092					upregulated	2	2.44974	0.0863	upregulated	2	6.1138	0.0022	downregulated	1	2.39834	0.0909	downregulated	1	2.02875	0.1315
mating behavior	GO	5 out of 6	17.5879					upregulated	1	1.19458	0.3028	upregulated	3	5.17733	0.0056	upregulated	2	5.52369	0.004	downregulated	1	1.12393	0.325	downregulated	2	4.56834	0.0104
positive regulation of telomerase RNA localization to Cajal body	GO	2 out of 6	17.5627	upregulated	1	1.18271	0.3064													downregulated	7	16.38	7.7e-08
amino acid binding	GO	5 out of 6	17.5608	upregulated	2	1.68981	0.1846	upregulated	4	5.65545	0.0035	upregulated	6	5.75405	0.0032	upregulated	1	2.95422	0.0521	downregulated	2	1.50726	0.2215	downregulated	3	2.89791	0.0551
cellular modified amino acid metabolic process	GO	4 out of 6	17.3578	downregulated	2	0.10756	0.898	upregulated	9	4.43891	0.0118	upregulated	4	5.43077	0.0044	downregulated	5	0.756416	0.4693	downregulated	9	3.83121	0.0217	downregulated	6	4.52094	0.0109
spliceosomal snRNP complex	GO	5 out of 6	17.0738	upregulated	2	2.14862	0.1166	upregulated	7	8.73728	0.0002	upregulated	2	2.82392	0.0594	downregulated	1	0.173156	0.841	downregulated	3	2.1719	0.114	downregulated	1	1.36527	0.2553
mitochondrial transmembrane transport	GO	3 out of 6	16.9972	upregulated	2	0.45452	0.6348	downregulated	2	1.30171	0.2721	downregulated	2	0.687201	0.503	downregulated	1	0.739342	0.4774	downregulated	9	11.5406	9.7e-06	downregulated	6	7.73042	0.0004
regulation of dendrite morphogenesis	GO	5 out of 6	16.9245	upregulated	9	2.94339	0.0527	upregulated	5	2.74189	0.0644	upregulated	4	3.52173	0.0295	upregulated	4	6.28942	0.0019	upregulated	3	0.194538	0.8232	downregulated	2	1.62262	0.1974
pigment metabolic process	GO	6 out of 6	16.8797	upregulated	3	0.924938	0.3966	upregulated	6	5.60997	0.0037	upregulated	6	4.95184	0.0071	upregulated	2	2.9897	0.0503	downregulated	1	1.9126	0.1477	downregulated	1	0.490623	0.6122
cullin-RING ubiquitin ligase complex	GO	4 out of 6	16.8436	upregulated	19	10.8299	2e-05	upregulated	8	2.55874	0.0774	downregulated	9	0.744264	0.4751	downregulated	3	0.362861	0.6957	downregulated	6	2.51016	0.0813	downregulated	3	2.05193	0.1285
small nuclear ribonucleoprotein complex	GO	6 out of 6	16.8211	upregulated	2	2.03978	0.1301	upregulated	7	7.9803	0.0003	upregulated	2	2.61438	0.0732	upregulated	1	0.897079	0.4078	downregulated	3	1.99961	0.1354	downregulated	1	1.29001	0.2753
regulation of voltage-gated calcium channel activity	GO	5 out of 6	16.7261	upregulated	5	10.5141	2.7e-05	downregulated	1	2.87067	0.0567	upregulated	4	4.26087	0.0141	upregulated	1	1.75748	0.1725	downregulated	1	0.81679	0.4418	downregulated	1	2.24761	0.1057
peptide hormone binding	GO	6 out of 6	16.5241	upregulated	2	2.83339	0.0588	upregulated	2	2.9996	0.0498	upregulated	3	2.07625	0.1254	upregulated	3	6.17398	0.0021	downregulated	2	0.651779	0.5211	downregulated	2	1.78907	0.1671
pigment biosynthetic process	GO	4 out of 6	16.5166	upregulated	3	1.24954	0.2866	upregulated	6	6.74318	0.0012	upregulated	6	5.90334	0.0027	upregulated	2	3.34255	0.0353	downregulated	1	2.13745	0.118	upregulated	2	0.722004	0.4858
mRNA 3'-UTR AU-rich region binding	GO	4 out of 6	16.4522	upregulated	3	5.53121	0.004	upregulated	1	1.80328	0.1648	upregulated	3	4.90724	0.0074	upregulated	1	4.21049	0.0148
mating	GO	6 out of 6	16.4519	upregulated	1	1.04327	0.3523	upregulated	1	0.801582	0.4486	upregulated	4	5.59543	0.0037	upregulated	2	4.7108	0.009	downregulated	1	0.723603	0.485	downregulated	2	3.57719	0.028
sensory perception of pain	GO	4 out of 6	16.4441	upregulated	7	9.86933	5.2e-05	upregulated	1	2.23795	0.1067	upregulated	4	6.69858	0.0012	downregulated	5	4.52855	0.0108	upregulated	2	1.76768	0.1707	downregulated	4	3.93443	0.0196
mitochondrial transport	GO	3 out of 6	16.0411	downregulated	5	0.822797	0.4392	downregulated	3	0.704532	0.4943	downregulated	11	2.23976	0.1065	upregulated	1	0.909094	0.4029	downregulated	15	11.8078	7.4e-06	downregulated	9	7.09127	0.0008
heme-copper terminal oxidase activity	GO	5 out of 6	15.7862	upregulated	1	1.46654	0.2307	upregulated	2	2.30734	0.0995	upregulated	1	0.93659	0.392					downregulated	5	8.90636	0.0001	downregulated	1	2.16933	0.1143
regulation of telomerase RNA localization to Cajal body	GO	2 out of 6	15.7231	upregulated	1	0.996307	0.3692													downregulated	7	14.7267	4e-07
mitochondrial membrane organization	GO	4 out of 6	15.6724	downregulated	4	1.12314	0.3253	upregulated	4	0.833295	0.4346	upregulated	5	2.71964	0.0659	upregulated	1	1.24166	0.2889	downregulated	12	11.3278	1.2e-05	downregulated	5	3.3928	0.0336
proton-transporting two-sector ATPase complex, catalytic domain	GO	2 out of 6	15.6438																	downregulated	5	13.2036	1.8e-06	downregulated	1	2.44021	0.0871
regulation of GTP binding	GO	5 out of 6	15.6431	upregulated	4	5.06529	0.0063	upregulated	1	3.51381	0.0298	upregulated	1	1.04582	0.3514					downregulated	1	2.52053	0.0804	downregulated	1	3.49765	0.0303
nodal signaling pathway	GO	5 out of 6	15.6163	upregulated	3	7.42387	0.0006					upregulated	1	1.24646	0.2875	upregulated	1	3.27105	0.038	downregulated	1	1.52439	0.2178	downregulated	1	2.15054	0.1164
chaperonin-containing T-complex	GO	1 out of 6	15.6078					upregulated	1	3.01678	0.049									downregulated	6	15.6078	1.7e-07
positive regulation of establishment of protein localization to telomere	GO	1 out of 6	15.6078																	downregulated	6	15.6078	1.7e-07
maintenance of protein localization in organelle	GO	5 out of 6	15.6076	upregulated	3	2.67907	0.0686	upregulated	4	6.22405	0.002	upregulated	2	1.38191	0.2511	downregulated	2	0.755334	0.4699	downregulated	4	4.58524	0.0102	downregulated	2	1.49267	0.2248
spermatid differentiation	GO	6 out of 6	15.3704	upregulated	9	2.53056	0.0796	upregulated	6	1.76991	0.1703	upregulated	6	3.18245	0.0415	upregulated	4	2.90067	0.055	downregulated	5	2.75763	0.0634	downregulated	3	2.22918	0.1076
inorganic cation import across plasma membrane	GO	5 out of 6	15.2581	upregulated	3	2.49402	0.0826					upregulated	2	0.853365	0.426	upregulated	2	4.55557	0.0105	downregulated	3	1.94652	0.1428	downregulated	4	5.40862	0.0045
transcription factor activity, RNA polymerase II core promoter sequence-specific DNA binding	GO	5 out of 6	15.1065	upregulated	4	4.53744	0.0107	upregulated	1	3.46996	0.0311	upregulated	1	1.43399	0.2384	upregulated	1	4.73175	0.0088	upregulated	4	2.36985	0.0935	downregulated	2	3.30319	0.0368
regulation of postsynapse organization	GO	4 out of 6	15.0409	upregulated	5	1.24007	0.2894	upregulated	3	2.42245	0.0887	upregulated	4	3.33597	0.0356	upregulated	5	9.71675	6e-05	downregulated	1	1.24448	0.2881	upregulated	1	0.496388	0.6087
glutathione derivative biosynthetic process	GO	5 out of 6	15.0114	upregulated	2	2.62671	0.0723	upregulated	1	0.944496	0.3889					upregulated	1	2.17699	0.1134	downregulated	1	2.60217	0.0741	downregulated	1	6.661	0.0013
glycoprotein biosynthetic process	GO	4 out of 6	15.0003	upregulated	13	5.04663	0.0064	upregulated	19	8.14363	0.0003	upregulated	12	7.0121	0.0009	downregulated	13	5.20206	0.0055	downregulated	10	3.49985	0.0302	upregulated	7	3.49985	0.0302
positive regulation of renal sodium excretion	GO	3 out of 6	14.9512					upregulated	1	4.02911	0.0178	upregulated	3	4.90902	0.0074	upregulated	2	6.01302	0.0024
axolemma	GO	4 out of 6	14.9354	upregulated	1	2.5685	0.0767	downregulated	1	0.998093	0.3686	upregulated	1	7.6045	0.0005	upregulated	1	4.00194	0.0183	downregulated	1	1.75858	0.1723
regulation of tube diameter	GO	5 out of 6	14.6683	upregulated	5	2.99683	0.0499	upregulated	5	3.54271	0.0289	upregulated	9	6.17545	0.0021	downregulated	6	3.62581	0.0266	downregulated	6	2.58296	0.0756	downregulated	4	2.99616	0.05
regulation of blood vessel diameter	GO	5 out of 6	14.6683	upregulated	5	2.99683	0.0499	upregulated	5	3.54271	0.0289	upregulated	9	6.17545	0.0021	downregulated	6	3.62581	0.0266	downregulated	6	2.58296	0.0756	downregulated	4	2.99616	0.05
positive regulation of blood circulation	GO	5 out of 6	14.5763	upregulated	1	2.48568	0.0833	upregulated	2	4.49446	0.0112	upregulated	4	3.30537	0.0367	downregulated	4	2.24137	0.1063	downregulated	4	3.00365	0.0496	downregulated	3	3.52855	0.0293
regulation of long-term synaptic potentiation	GO	4 out of 6	14.5418	upregulated	2	5.60421	0.0037	upregulated	2	3.14883	0.0429	upregulated	1	2.06631	0.1267					downregulated	4	3.72249	0.0242	upregulated	2	1.51646	0.2195
ribonucleoprotein complex biogenesis	GO	6 out of 6	14.5033	upregulated	21	1.84708	0.1577	upregulated	26	5.9953	0.0025	upregulated	12	1.36392	0.2557	upregulated	3	0.418767	0.6579	downregulated	19	4.36671	0.0127	downregulated	3	0.511518	0.5996
social behavior	GO	5 out of 6	14.3536	upregulated	4	3.21838	0.04					upregulated	5	4.394	0.0124	upregulated	2	3.54682	0.0288	downregulated	1	1.77172	0.17	downregulated	1	1.42272	0.2411
cyclic purine nucleotide metabolic process	GO	4 out of 6	14.2564	upregulated	2	5.93689	0.0026					upregulated	2	2.67888	0.0686	upregulated	2	4.72203	0.0089	upregulated	1	1.04955	0.3501	downregulated	1	1.96819	0.1397
ribonucleoprotein complex binding	GO	6 out of 6	14.2163	upregulated	4	0.166067	0.847	upregulated	6	2.3094	0.0993	upregulated	8	5.30198	0.005	upregulated	2	2.47047	0.0845	downregulated	6	2.579	0.0758	downregulated	3	1.38939	0.2492
positive regulation of protein localization to chromosome, telomeric region	GO	1 out of 6	14.1795																	downregulated	6	14.1795	6.9e-07
reproductive behavior	GO	5 out of 6	14.0722					upregulated	1	0.89811	0.4073	upregulated	3	3.86923	0.0209	upregulated	2	4.58858	0.0102	downregulated	1	0.839928	0.4317	downregulated	2	3.87636	0.0207
establishment of protein localization to mitochondrion	GO	4 out of 6	13.8805	upregulated	6	1.99799	0.1356					upregulated	3	2.1654	0.1147					downregulated	6	7.30245	0.0007	downregulated	2	2.4147	0.0894
microtubule-based transport	GO	4 out of 6	13.8367	upregulated	9	2.67143	0.0692	upregulated	9	3.17859	0.0416	upregulated	4	1.87877	0.1528	downregulated	4	0.748672	0.473	downregulated	8	7.57464	0.0005	downregulated	3	1.95333	0.1418
response to heat	GO	5 out of 6	13.7859	upregulated	8	3.37471	0.0342	upregulated	5	2.48225	0.0836	upregulated	3	1.13367	0.3219	downregulated	4	1.16463	0.312	downregulated	5	2.60841	0.0737	downregulated	5	5.3515	0.0047
regulation of high voltage-gated calcium channel activity	GO	2 out of 6	13.7851	upregulated	4	11.1062	1.5e-05					upregulated	2	2.67888	0.0686
Wnt-protein binding	GO	5 out of 6	13.7656	upregulated	2	3.9656	0.019					upregulated	1	1.31438	0.2686	upregulated	1	3.49592	0.0303	downregulated	1	1.99946	0.1354	downregulated	1	2.99027	0.0503
PDZ domain binding	GO	5 out of 6	13.7368	upregulated	9	6.13813	0.0022	upregulated	2	2.42512	0.0885	upregulated	7	3.64808	0.026	upregulated	2	1.97262	0.1391	downregulated	5	3.71839	0.0243	upregulated	4	4.16554	0.0155
glutathione metabolic process	GO	5 out of 6	13.6705	upregulated	1	0.685731	0.5037	upregulated	1	1.17719	0.3081	upregulated	1	1.80838	0.1639					downregulated	4	4.20907	0.0149	downregulated	2	5.79017	0.0031
nucleoid	GO	3 out of 6	13.6418	downregulated	1	0.697924	0.4976	upregulated	2	1.3941	0.2481	downregulated	1	0.824053	0.4387	downregulated	2	1.1818	0.3067	downregulated	8	9.39829	8.3e-05	downregulated	4	5.55322	0.0039
negative regulation of cation channel activity	GO	6 out of 6	13.5974	upregulated	4	4.19587	0.0151	upregulated	1	2.48404	0.0834	upregulated	2	1.29943	0.2727	upregulated	1	1.66745	0.1887	downregulated	2	1.87464	0.1534	downregulated	1	2.07599	0.1254
magnesium ion transmembrane transport	GO	3 out of 6	13.5813	upregulated	4	8.07262	0.0003	upregulated	1	1.02771	0.3578	downregulated	2	1.97975	0.1381					downregulated	1	6.46069	0.0016
fatty acid metabolic process	GO	4 out of 6	13.5802	downregulated	11	4.5038	0.0111	upregulated	15	3.58242	0.0278	upregulated	15	7.43596	0.0006	downregulated	14	6.36581	0.0017	downregulated	18	10.0112	4.5e-05	downregulated	7	3.42027	0.0327
positive regulation of voltage-gated calcium channel activity	GO	2 out of 6	13.5135	upregulated	4	12.0956	5.6e-06					upregulated	1	1.41794	0.2422
single fertilization	GO	5 out of 6	13.4942	upregulated	3	1.06448	0.3449					upregulated	5	2.96842	0.0514	upregulated	3	2.91258	0.0543	downregulated	8	5.05269	0.0064	downregulated	3	1.49606	0.224
response to steroid hormone	GO	5 out of 6	13.4781	downregulated	11	3.46124	0.0314	upregulated	9	4.06177	0.0172	upregulated	12	2.84808	0.058	upregulated	6	5.15848	0.0058	downregulated	7	2.9947	0.0501	downregulated	5	1.87627	0.1532
large ribosomal subunit	GO	6 out of 6	13.4689	upregulated	10	3.6448	0.0261	upregulated	5	1.0564	0.3477	upregulated	3	0.761765	0.4668	upregulated	1	0.604979	0.5461	downregulated	9	4.51821	0.0109	downregulated	3	2.88273	0.056
regulation of blood vessel size	GO	4 out of 6	13.4011	upregulated	6	4.52182	0.0109	upregulated	6	3.93132	0.0196	upregulated	10	7.57943	0.0005	downregulated	6	3.42797	0.0325	downregulated	6	2.38234	0.0923	downregulated	4	2.93595	0.0531
regulation of tube size	GO	4 out of 6	13.396	upregulated	6	4.50891	0.011	upregulated	6	3.91725	0.0199	upregulated	10	7.56478	0.0005	downregulated	6	3.40432	0.0332	downregulated	6	2.38234	0.0923	downregulated	4	2.93595	0.0531
protein tag	GO	4 out of 6	13.2961	upregulated	3	5.80501	0.003	upregulated	1	1.35367	0.2583									downregulated	1	1.85144	0.157	downregulated	2	4.28601	0.0138
translation regulator activity	GO	5 out of 6	13.2119	upregulated	2	0.543978	0.5804	upregulated	3	4.71765	0.0089	upregulated	6	4.64257	0.0096	upregulated	2	3.0476	0.0475	downregulated	2	1.65439	0.1912	upregulated	2	1.39433	0.248
9+2 motile cilium	GO	6 out of 6	13.2024	upregulated	5	2.5572	0.0775	upregulated	4	1.84541	0.158	upregulated	3	2.14445	0.1171	upregulated	1	2.53783	0.079	downregulated	1	1.92045	0.1465	downregulated	1	2.19708	0.1111
transferase activity, transferring hexosyl groups	GO	4 out of 6	13.1036	upregulated	6	3.22903	0.0396	upregulated	9	2.79401	0.0612	upregulated	9	5.83418	0.0029	downregulated	8	1.40262	0.246	downregulated	10	4.35779	0.0128	upregulated	5	1.70883	0.1811
regulation of cation channel activity	GO	4 out of 6	13.0461	upregulated	13	10.8918	1.9e-05	downregulated	4	1.50783	0.2214	upregulated	5	1.01145	0.3637	downregulated	2	2.72108	0.0658	downregulated	6	1.54942	0.2124	downregulated	4	3.82241	0.0219
negative regulation of calcium ion transmembrane transporter activity	GO	6 out of 6	12.9908	upregulated	2	1.60355	0.2012	upregulated	2	1.77467	0.1695	upregulated	2	1.56472	0.2091	upregulated	1	1.83496	0.1596	downregulated	3	3.94787	0.0193	downregulated	1	2.26498	0.1038
protein transmembrane transport	GO	4 out of 6	12.979	upregulated	3	0.49346	0.6105	upregulated	2	0.937712	0.3915	downregulated	1	5.24638	0.0053					downregulated	7	9.71605	6e-05	downregulated	5	7.07818	0.0008
regulation of renal sodium excretion	GO	3 out of 6	12.9616					upregulated	1	3.65017	0.026	upregulated	3	3.97414	0.0188	upregulated	2	5.33728	0.0048
ERAD pathway	GO	4 out of 6	12.9547	upregulated	7	3.07385	0.0462	upregulated	10	9.25656	9.5e-05	upregulated	3	0.876082	0.4164	downregulated	4	0.903255	0.4052	downregulated	2	1.56489	0.2091	upregulated	2	0.913422	0.4011
positive regulation of protein localization to nucleus	GO	3 out of 6	12.9205	downregulated	2	1.11171	0.329	upregulated	1	0.0656498	0.9365	downregulated	4	1.0627	0.3455	downregulated	3	0.755997	0.4695	downregulated	11	12.2656	4.7e-06	downregulated	3	3.51961	0.0296
protein transmembrane import into intracellular organelle	GO	5 out of 6	12.8844	upregulated	1	0.737647	0.4782	upregulated	1	1.0139	0.3628	upregulated	1	1.27296	0.28					downregulated	5	7.33779	0.0007	downregulated	2	2.52213	0.0803
transcription factor activity, RNA polymerase II core promoter sequence-specific binding involved in preinitiation complex assembly	GO	4 out of 6	12.8201	upregulated	2	2.1235	0.1196	upregulated	1	4.26175	0.0141					upregulated	1	5.52978	0.004	upregulated	1	1.7059	0.1816	downregulated	1	2.61094	0.0735
perikaryon	GO	5 out of 6	12.7974	upregulated	5	2.47407	0.0842	downregulated	3	2.61115	0.0735	upregulated	2	1.88082	0.1525	upregulated	1	0.871616	0.4183	downregulated	9	7.23819	0.0007	downregulated	3	2.94388	0.0527
proton-exporting ATPase activity	GO	4 out of 6	12.7701	upregulated	1	0.237621	0.7885					upregulated	1	0.613312	0.5416					downregulated	5	10.3981	3e-05	downregulated	1	1.52105	0.2185
peroxisome organization	GO	4 out of 6	12.691	upregulated	3	0.492259	0.6112	upregulated	7	5.69656	0.0034	upregulated	4	5.49331	0.0041	downregulated	2	1.21297	0.2973	downregulated	4	2.22185	0.1084	downregulated	3	2.49646	0.0824
cellular lipid catabolic process	GO	3 out of 6	12.459	downregulated	3	4.33484	0.0131	upregulated	13	7.94099	0.0004	upregulated	11	8.12444	0.0003	downregulated	8	2.24311	0.1061	downregulated	10	5.6775	0.0034	upregulated	7	2.70602	0.0668
ovulation cycle	GO	5 out of 6	12.4386	upregulated	3	1.62692	0.1965	upregulated	2	2.15577	0.1158	upregulated	2	3.40016	0.0334	upregulated	1	3.65346	0.0259	upregulated	6	3.04281	0.0477	downregulated	2	1.60231	0.2014
COP9 signalosome	GO	3 out of 6	12.4337	upregulated	3	2.71138	0.0664					upregulated	3	5.99014	0.0025	downregulated	1	1.00235	0.367	downregulated	4	4.73457	0.0088
divalent inorganic cation transmembrane transporter activity	GO	4 out of 6	12.3604	upregulated	2	2.71531	0.0662	upregulated	1	3.96607	0.0189	downregulated	1	0.237517	0.7886					downregulated	2	3.02037	0.0488	downregulated	1	2.89613	0.0552
carbon-nitrogen lyase activity	GO	4 out of 6	12.3417	upregulated	2	3.02976	0.0483	upregulated	1	2.84757	0.058	downregulated	1	0.543173	0.5809					downregulated	2	3.71513	0.0244	downregulated	1	3.29242	0.0372
protein-containing complex disassembly	GO	4 out of 6	12.3016	upregulated	16	2.91628	0.0541	upregulated	13	2.74036	0.0645	downregulated	11	1.28596	0.2764	downregulated	8	1.26364	0.2826	downregulated	15	7.93357	0.0004	downregulated	3	1.26097	0.2834
regulation of blood pressure	GO	5 out of 6	12.2673	upregulated	3	3.03247	0.0482	upregulated	6	1.34807	0.2597	downregulated	8	3.10546	0.0448	upregulated	3	1.77235	0.1699	downregulated	7	2.04418	0.1295	downregulated	7	4.07027	0.0171
L-ascorbic acid binding	GO	3 out of 6	12.2387	downregulated	1	2.08746	0.124	upregulated	3	4.04768	0.0175	downregulated	1	1.27427	0.2796	downregulated	1	0.889479	0.4109	downregulated	3	8.01515	0.0003	downregulated	2	4.42713	0.0119
regulation of cytoplasmic translation	GO	4 out of 6	12.1613	upregulated	2	2.41613	0.0893	upregulated	2	1.30036	0.2724	upregulated	4	5.94498	0.0026	upregulated	1	3.85066	0.0213	downregulated	1	1.07976	0.3397	upregulated	1	1.35084	0.259
intraciliary transport involved in cilium assembly	GO	4 out of 6	12.1335	upregulated	1	1.84576	0.1579	upregulated	4	4.29401	0.0137	upregulated	2	4.11796	0.0163					downregulated	1	1.87578	0.1532
sperm flagellum	GO	6 out of 6	12.1029	upregulated	3	1.0456	0.3515	upregulated	4	1.9993	0.1354	upregulated	3	2.28091	0.1022	upregulated	1	2.59616	0.0746	downregulated	1	1.95184	0.142	downregulated	1	2.22912	0.1076
water homeostasis	GO	6 out of 6	12.0895	upregulated	2	0.569015	0.5661	upregulated	1	3.37537	0.0342	upregulated	1	3.53978	0.029	upregulated	1	0.943037	0.3894	downregulated	1	1.35899	0.2569	downregulated	1	2.30335	0.0999
mitochondrial ribosome	GO	2 out of 6	11.9735	upregulated	9	5.63471	0.0036	upregulated	4	1.41803	0.2422	upregulated	3	1.48887	0.2256	upregulated	1	0.918966	0.3989	downregulated	8	8.90533	0.0001	downregulated	2	3.06817	0.0465
dioxygenase activity	GO	4 out of 6	11.9171	downregulated	3	2.39089	0.0915	upregulated	6	2.44662	0.0866	downregulated	5	0.752375	0.4712	upregulated	3	3.27369	0.0379	downregulated	3	3.56119	0.0284	downregulated	3	5.77885	0.0031
translation factor activity, RNA binding	GO	5 out of 6	11.8439	upregulated	3	0.153678	0.8575	upregulated	3	1.935	0.1444	upregulated	6	2.93399	0.0532	upregulated	1	2.69139	0.0678	downregulated	8	6.96294	0.0009	upregulated	5	2.83311	0.0588
cytoskeletal adaptor activity	GO	4 out of 6	11.8263					upregulated	2	2.95168	0.0523	upregulated	2	2.97218	0.0512	upregulated	1	4.14385	0.0159	downregulated	1	1.75858	0.1723
pigmentation	GO	5 out of 6	11.7587	upregulated	6	5.51577	0.004	upregulated	2	1.86349	0.1551	upregulated	5	2.34505	0.0958	upregulated	1	0.858337	0.4239	downregulated	3	1.24334	0.2884	upregulated	1	0.0672921	0.9349
developmental pigmentation	GO	5 out of 6	11.7441	upregulated	2	3.50095	0.0302	upregulated	2	2.61576	0.0731	upregulated	2	2.11602	0.1205	upregulated	1	1.51453	0.2199	downregulated	1	1.99687	0.1358
response to temperature stimulus	GO	5 out of 6	11.7298	upregulated	10	3.25624	0.0385	upregulated	5	1.3548	0.258	upregulated	4	0.505447	0.6032	downregulated	5	0.752921	0.471	downregulated	5	1.60058	0.2018	downregulated	7	5.76569	0.0031
regulation of neurotransmitter secretion	GO	5 out of 6	11.6959	upregulated	6	3.43944	0.0321	upregulated	1	2.99185	0.0502	upregulated	4	2.42106	0.0888	downregulated	2	1.44975	0.2346	downregulated	2	0.924034	0.3969	downregulated	3	3.36929	0.0344
regulation of protein import	GO	4 out of 6	11.6861	upregulated	4	1.78393	0.168	upregulated	2	1.10517	0.3312	downregulated	3	0.991603	0.371	downregulated	3	1.10745	0.3304	downregulated	5	5.62918	0.0036	downregulated	4	5.26683	0.0052
response to light stimulus	GO	4 out of 6	11.6646	upregulated	9	0.64831	0.5229	upregulated	17	6.65788	0.0013	upregulated	7	4.64612	0.0096	downregulated	14	2.96401	0.0516	upregulated	20	1.18906	0.3045	downregulated	8	3.86535	0.021
presynaptic active zone	GO	3 out of 6	11.6557	upregulated	4	9.33466	8.8e-05	downregulated	1	1.33892	0.2621	upregulated	2	2.41407	0.0895					upregulated	1	0.698823	0.4972	downregulated	1	1.9447	0.143
cellular response to increased oxygen levels	GO	3 out of 6	11.6491					upregulated	1	3.42815	0.0324									downregulated	2	5.96864	0.0026	downregulated	1	2.25233	0.1052
postsynapse assembly	GO	4 out of 6	11.611	upregulated	2	3.50215	0.0301					upregulated	2	3.37644	0.0342	upregulated	1	3.27342	0.0379	downregulated	1	2.90558	0.0547	upregulated	1	1.44655	0.2354
transferase activity, transferring glycosyl groups	GO	4 out of 6	11.5658	upregulated	9	3.63038	0.0265	upregulated	12	3.47763	0.0309	upregulated	9	4.42915	0.0119	downregulated	10	2.18566	0.1124	downregulated	11	3.57199	0.0281	upregulated	5	1.35772	0.2572
pigment granule localization	GO	3 out of 6	11.5355	upregulated	4	4.65905	0.0095					upregulated	3	3.8838	0.0206					downregulated	2	2.99266	0.0502
response to BMP	GO	4 out of 6	11.449	upregulated	9	6.84686	0.0011	downregulated	1	2.46505	0.085	upregulated	5	1.90962	0.1481	upregulated	2	3.01651	0.049	downregulated	1	2.86044	0.0572	upregulated	1	0.719386	0.4871
cellular response to BMP stimulus	GO	4 out of 6	11.449	upregulated	9	6.84686	0.0011	downregulated	1	2.46505	0.085	upregulated	5	1.90962	0.1481	upregulated	2	3.01651	0.049	downregulated	1	2.86044	0.0572	upregulated	1	0.719386	0.4871
negative regulation of voltage-gated calcium channel activity	GO	5 out of 6	11.3979	upregulated	1	2.12611	0.1193					upregulated	1	1.40502	0.2454	upregulated	1	2.88958	0.0556	downregulated	1	1.70202	0.1823	downregulated	1	3.27521	0.0378
translation	GO	2 out of 6	11.3186	upregulated	15	0.251288	0.7778	upregulated	16	3.78873	0.0226	upregulated	13	1.37089	0.2539	upregulated	5	1.41957	0.2418	downregulated	25	10.1685	3.8e-05	downregulated	6	1.15015	0.3166
neuropeptide receptor activity	GO	4 out of 6	11.2924	upregulated	2	5.25447	0.0052					upregulated	2	2.01249	0.1337					downregulated	1	2.58454	0.0754	downregulated	1	1.44092	0.2367
membrane depolarization during action potential	GO	4 out of 6	11.269	upregulated	4	6.38328	0.0017	downregulated	1	1.1864	0.3053	upregulated	2	1.56908	0.2082					downregulated	2	1.54513	0.2133	downregulated	2	2.95792	0.0519
nucleoside metabolic process	GO	5 out of 6	11.2573	upregulated	9	3.52378	0.0295	upregulated	6	1.94658	0.1428	downregulated	8	1.48048	0.2275	upregulated	2	1.30606	0.2709	downregulated	5	3.45536	0.0316	downregulated	4	2.50605	0.0816
oligosaccharyltransferase complex	GO	3 out of 6	11.2448	upregulated	1	4.19681	0.015	upregulated	1	1.63549	0.1949					downregulated	1	1.36651	0.255	downregulated	2	6.77903	0.0011
regulation of sensory perception of pain	GO	4 out of 6	11.1874	upregulated	1	3.45688	0.0315	upregulated	1	3.08749	0.0456	upregulated	2	4.9517	0.0071	downregulated	2	1.73135	0.177					downregulated	1	1.42269	0.2411
mitochondrial large ribosomal subunit	GO	2 out of 6	11.1687	upregulated	7	5.87458	0.0028	upregulated	3	1.49855	0.2235	upregulated	3	2.38972	0.0917	upregulated	1	1.26619	0.2819	downregulated	6	7.25214	0.0007	downregulated	2	3.91655	0.0199
oxidoreductase activity, oxidizing metal ions	GO	4 out of 6	11.158	upregulated	1	1.42298	0.241					downregulated	1	1.00718	0.3652	upregulated	1	2.68796	0.068	downregulated	3	5.35016	0.0047	downregulated	1	2.70406	0.0669
cellular response to forskolin	GO	4 out of 6	11.1166									upregulated	1	3.53374	0.0292	upregulated	1	2.24979	0.1054	downregulated	1	2.17142	0.114	downregulated	1	3.16164	0.0424
fertilization	GO	5 out of 6	11.0841	upregulated	4	0.858719	0.4237					upregulated	5	2.48278	0.0835	upregulated	3	2.45492	0.0859	downregulated	8	4.06257	0.0172	downregulated	3	1.22514	0.2937
regulation of cyclase activity	GO	4 out of 6	11.0415	upregulated	3	1.41753	0.2423	upregulated	2	5.80213	0.003	upregulated	4	4.04265	0.0176	upregulated	2	3.73906	0.0238	upregulated	3	2.09654	0.1229	upregulated	2	1.86328	0.1552
establishment of protein localization to peroxisome	GO	4 out of 6	10.9483	upregulated	2	0.341624	0.7106	upregulated	7	6.44734	0.0016	upregulated	4	5.78712	0.0031	downregulated	2	1.33984	0.2619	downregulated	4	2.51628	0.0808	upregulated	5	2.80426	0.0606
regulation of ERAD pathway	GO	4 out of 6	10.9322	upregulated	5	4.8722	0.0077	upregulated	3	3.50628	0.03	downregulated	1	0.106642	0.8988	downregulated	1	0.543669	0.5806	downregulated	2	1.64169	0.1937	downregulated	1	1.56236	0.2096
ribonucleoprotein complex assembly	GO	5 out of 6	10.9316	upregulated	8	1.1339	0.3218	upregulated	14	3.97372	0.0188	upregulated	9	2.18066	0.113	upregulated	2	0.581011	0.5593	downregulated	9	3.962	0.019	upregulated	7	0.899666	0.4067
ribosome biogenesis	GO	5 out of 6	10.8823	upregulated	16	2.89433	0.0553	upregulated	14	3.29162	0.0372	upregulated	4	1.39473	0.2479	upregulated	1	0.570378	0.5653	downregulated	13	3.48105	0.0308	upregulated	3	0.749816	0.4725
carboxy-lyase activity	GO	3 out of 6	10.8774	downregulated	2	5.84615	0.0029	upregulated	3	3.12493	0.0439	upregulated	5	8.14633	0.0003	upregulated	2	8.26854	0.0003	upregulated	3	2.27583	0.1027	upregulated	1	0.540462	0.5825
proton-transporting two-sector ATPase complex, proton-transporting domain	GO	4 out of 6	10.8674	upregulated	1	1.78753	0.1674	upregulated	1	2.68548	0.0682	upregulated	1	2.72833	0.0653					downregulated	1	3.66602	0.0256
iron ion import	GO	4 out of 6	10.8248	upregulated	1	0.880479	0.4146					upregulated	2	1.73742	0.176	upregulated	1	2.96918	0.0513	upregulated	2	1.81519	0.1628	downregulated	3	7.0529	0.0009
membrane docking	GO	2 out of 6	10.8189	upregulated	16	8.01399	0.0003	upregulated	12	7.36402	0.0006	downregulated	15	1.85476	0.1565	downregulated	7	1.27827	0.2785	downregulated	5	2.536	0.0792	upregulated	7	1.42611	0.2402
carbon-carbon lyase activity	GO	3 out of 6	10.784	downregulated	2	5.39573	0.0045	upregulated	5	4.54442	0.0106	upregulated	6	8.10814	0.0003	upregulated	3	8.03238	0.0003	upregulated	5	3.13431	0.0435	upregulated	2	1.3709	0.2539
excitatory synapse assembly	GO	4 out of 6	10.7332	upregulated	2	4.17215	0.0154					upregulated	1	1.57698	0.2066	upregulated	1	3.49785	0.0303	downregulated	1	3.21188	0.0403	upregulated	1	1.72562	0.1781
negative regulation of oxidative stress-induced cell death	GO	4 out of 6	10.6853	upregulated	4	2.53283	0.0794	upregulated	2	3.59938	0.0273	downregulated	4	3.21633	0.0401	downregulated	2	1.81664	0.1626	downregulated	3	4.05811	0.0173	downregulated	2	5.52791	0.004
negative regulation of cellular response to oxidative stress	GO	4 out of 6	10.6853	upregulated	4	2.53283	0.0794	upregulated	2	3.59938	0.0273	downregulated	4	3.21633	0.0401	downregulated	2	1.81664	0.1626	downregulated	3	4.05811	0.0173	downregulated	2	5.52791	0.004
response to ionizing radiation	GO	3 out of 6	10.6797	upregulated	8	1.64694	0.1926	upregulated	14	7.04937	0.0009	upregulated	8	4.23884	0.0144	downregulated	4	0.548975	0.5775	upregulated	7	0.854896	0.4253	upregulated	5	0.851551	0.4268
negative regulation of oxidative stress-induced intrinsic apoptotic signaling pathway	GO	4 out of 6	10.6728	upregulated	3	3.47557	0.0309					upregulated	1	1.09659	0.334					downregulated	2	2.90565	0.0547	downregulated	1	3.19498	0.041
glycerol ether metabolic process	GO	3 out of 6	10.6713	downregulated	1	1.82736	0.1608	upregulated	2	5.23617	0.0053	upregulated	1	2.33684	0.0966					downregulated	2	4.92562	0.0073
blood circulation	GO	3 out of 6	10.6515	upregulated	15	10.8291	2e-05	downregulated	7	3.35172	0.035	upregulated	18	5.76186	0.0031	downregulated	11	3.63939	0.0263	upregulated	13	3.27325	0.0379	downregulated	13	4.32498	0.0132
sperm capacitation	GO	5 out of 6	10.6428	upregulated	1	0.479303	0.6192					upregulated	1	2.09066	0.1236	upregulated	1	3.8895	0.0205	downregulated	1	2.65036	0.0706	downregulated	1	1.53301	0.2159
distal axon	GO	4 out of 6	10.6035	upregulated	19	11.4914	1e-05	upregulated	8	1.17386	0.3092	upregulated	5	2.78639	0.0616	downregulated	11	1.92863	0.1453	downregulated	9	2.57978	0.0758	upregulated	10	5.49928	0.0041
dendritic spine	GO	3 out of 6	10.5993	upregulated	12	7.54659	0.0005	downregulated	7	3.3794	0.0341	upregulated	11	4.38466	0.0125	upregulated	5	5.41856	0.0044	upregulated	15	3.37114	0.0344	upregulated	9	3.40885	0.0331
neurotransmitter secretion	GO	4 out of 6	10.5767	upregulated	9	8.54019	0.0002	upregulated	1	0.167673	0.8456	upregulated	5	2.92829	0.0535	downregulated	2	0.993192	0.3704	upregulated	5	1.76717	0.1708	downregulated	2	1.70092	0.1825
regulation of potassium ion transmembrane transport	GO	4 out of 6	10.5754	upregulated	6	3.83026	0.0217	upregulated	2	1.86717	0.1546	upregulated	4	2.87133	0.0566	upregulated	1	2.0066	0.1344	downregulated	4	2.38282	0.0923	downregulated	2	1.67773	0.1868
regulation of calcium ion transmembrane transporter activity	GO	5 out of 6	10.5559	upregulated	7	6.40708	0.0016	downregulated	2	4.70472	0.0091	upregulated	4	1.64067	0.1938	upregulated	1	0.989171	0.3719	downregulated	5	2.53516	0.0792	downregulated	2	3.6885	0.025
feeding behavior	GO	5 out of 6	10.5557	upregulated	6	5.80826	0.003	upregulated	2	0.884521	0.4129	upregulated	3	1.86163	0.1554	upregulated	1	0.73398	0.48	upregulated	2	0.974637	0.3773	downregulated	3	2.24196	0.1063
negative regulation of response to oxidative stress	GO	4 out of 6	10.5076	upregulated	4	2.35047	0.0953	upregulated	2	3.51514	0.0297	downregulated	4	3.13387	0.0435	downregulated	2	1.75723	0.1725	downregulated	3	4.03211	0.0177	downregulated	2	5.50094	0.0041
response to amyloid-beta	GO	4 out of 6	10.4832	downregulated	1	1.5617	0.2098	upregulated	1	3.15378	0.0427	upregulated	2	2.19167	0.1117	downregulated	2	0.960177	0.3828	downregulated	3	3.47078	0.0311	downregulated	3	4.18885	0.0152
ciliary transition zone	GO	5 out of 6	10.4751	upregulated	8	4.22209	0.0147	downregulated	1	1.12728	0.3239	upregulated	2	0.637738	0.5285	upregulated	1	0.94213	0.3898	downregulated	4	4.33607	0.0131	downregulated	1	1.4643	0.2312
cellular response to leucine starvation	GO	3 out of 6	10.4611					upregulated	2	6.00025	0.0025	upregulated	1	2.49528	0.0825					upregulated	1	1.77874	0.1689	downregulated	1	3.74428	0.0237
multicellular organismal response to stress	GO	3 out of 6	10.4133	downregulated	2	0.782505	0.4573	upregulated	1	2.02086	0.1325	upregulated	6	8.48682	0.0002	upregulated	1	1.9766	0.1385	upregulated	1	0.574764	0.5628	upregulated	2	0.713749	0.4898
ciliary basal body-plasma membrane docking	GO	3 out of 6	10.4057	upregulated	12	7.3842	0.0006	upregulated	8	6.94068	0.001	downregulated	11	3.82358	0.0218	downregulated	4	2.34038	0.0963	downregulated	3	2.81282	0.06	upregulated	3	0.568052	0.5666
mannosylation	GO	3 out of 6	10.3849	upregulated	2	1.64356	0.1933	upregulated	2	2.38476	0.0921	upregulated	3	8.3758	0.0002					upregulated	1	1.0082	0.3649	upregulated	1	1.01099	0.3639
vasodilation	GO	4 out of 6	10.3102	upregulated	3	4.08024	0.0169	upregulated	2	3.21391	0.0402	upregulated	2	2.07139	0.126					downregulated	2	2.06414	0.1269	upregulated	1	1.11947	0.3265
AV node cell to bundle of His cell communication	GO	4 out of 6	10.3034	upregulated	1	2.98055	0.0508					upregulated	2	3.3446	0.0353	downregulated	1	2.77557	0.0623	downregulated	2	3.28761	0.0373	downregulated	1	3.46624	0.0312
sleep	GO	2 out of 6	10.2682	upregulated	1	3.98922	0.0185					upregulated	3	6.27902	0.0019
translation repressor activity	GO	3 out of 6	10.1757					upregulated	1	5.52658	0.004	upregulated	5	5.79315	0.003	upregulated	1	3.64445	0.0261	upregulated	2	2.03322	0.1309	upregulated	2	2.7553	0.0636
alcohol metabolic process	GO	2 out of 6	10.1487	downregulated	7	3.93942	0.0195	upregulated	11	2.87107	0.0566	downregulated	19	8.57857	0.0002	downregulated	19	12.6285	3.3e-06	downregulated	17	6.44389	0.0016	downregulated	9	3.70485	0.0246
visual behavior	GO	4 out of 6	10.1464	upregulated	2	1.61449	0.199	downregulated	2	1.5878	0.2044	upregulated	3	7.18226	0.0008					downregulated	1	0.372263	0.6892	downregulated	2	2.56523	0.0769
respiratory chain complex III	GO	2 out of 6	10.0239																	downregulated	2	6.72881	0.0012	downregulated	1	3.29511	0.0371
monosaccharide transmembrane transport	GO	4 out of 6	9.98051	upregulated	1	2.21947	0.1087	downregulated	1	1.86069	0.1556	upregulated	1	1.41708	0.2424	downregulated	2	3.11637	0.0443	downregulated	3	7.37935	0.0006	downregulated	2	3.94167	0.0194
translation activator activity	GO	4 out of 6	9.96667	upregulated	1	1.03509	0.3552	upregulated	1	1.63549	0.1949	upregulated	1	4.3239	0.0132					downregulated	1	2.9722	0.0512
regulation of response to drug	GO	4 out of 6	9.94934	upregulated	6	6.44315	0.0016	upregulated	3	2.36557	0.0939	downregulated	8	3.21338	0.0402	downregulated	3	2.30836	0.0994	downregulated	6	4.65416	0.0095	downregulated	2	2.0082	0.1342
ciliary tip	GO	3 out of 6	9.88615					upregulated	4	3.8227	0.0219	upregulated	2	4.11796	0.0163					downregulated	1	1.94549	0.1429
regulation of protein targeting to mitochondrion	GO	4 out of 6	9.86835	upregulated	3	2.23012	0.1075					upregulated	1	0.742565	0.4759	downregulated	2	0.788117	0.4547	downregulated	5	4.41061	0.0121	downregulated	3	3.27318	0.0379
thiol-dependent ubiquitinyl hydrolase activity	GO	4 out of 6	9.83543	upregulated	7	0.866288	0.4205	upregulated	12	6.13803	0.0022	upregulated	4	1.76256	0.1716	downregulated	7	2.60529	0.0739	upregulated	5	0.495077	0.6095	downregulated	3	4.16892	0.0155
ubiquitinyl hydrolase activity	GO	4 out of 6	9.83543	upregulated	7	0.866288	0.4205	upregulated	12	6.13803	0.0022	upregulated	4	1.76256	0.1716	downregulated	7	2.60529	0.0739	upregulated	5	0.495077	0.6095	downregulated	3	4.16892	0.0155
insemination	GO	4 out of 6	9.73426	upregulated	1	1.91183	0.1478	upregulated	1	1.56547	0.209	upregulated	2	3.79799	0.0224	upregulated	1	2.97573	0.051	upregulated	1	0.516766	0.5964
parturition	GO	4 out of 6	9.68041									upregulated	2	2.71759	0.066	upregulated	1	2.49813	0.0822	downregulated	1	1.45801	0.2327	downregulated	1	3.00668	0.0495
nucleotide catabolic process	GO	4 out of 6	9.64003	upregulated	1	1.09456	0.3347	downregulated	2	0.889058	0.411	downregulated	5	2.66595	0.0695	upregulated	2	1.25653	0.2846	downregulated	5	5.49676	0.0041	downregulated	6	5.34718	0.0048
spermatid development	GO	5 out of 6	9.61049	upregulated	9	2.80964	0.0602	upregulated	5	1.39982	0.2466	upregulated	6	3.36647	0.0345	downregulated	7	3.1313	0.0437	downregulated	5	2.84949	0.0579	downregulated	3	2.31637	0.0986
nucleoside phosphate catabolic process	GO	4 out of 6	9.604	upregulated	1	1.04845	0.3505	downregulated	2	0.84596	0.4291	downregulated	5	2.45465	0.0859	upregulated	2	1.17929	0.3075	downregulated	6	5.52333	0.004	downregulated	6	5.15355	0.0058
positive regulation of protein import	GO	4 out of 6	9.59657	upregulated	2	1.40847	0.2445	upregulated	1	0.194855	0.823	downregulated	3	1.60563	0.2008	downregulated	2	0.805038	0.4471	downregulated	4	5.5643	0.0038	downregulated	3	4.83962	0.0079
positive regulation of ERAD pathway	GO	4 out of 6	9.58128	upregulated	2	2.95991	0.0518	upregulated	2	3.37498	0.0342	downregulated	1	0.403955	0.6677	downregulated	1	1.07434	0.3415	downregulated	2	2.61993	0.0728	downregulated	1	2.10476	0.1219
intramolecular oxidoreductase activity, transposing C=C bonds	GO	3 out of 6	9.53927									upregulated	1	1.96962	0.1395	upregulated	1	2.74587	0.0642	downregulated	2	4.82377	0.008
multicellular organism aging	GO	4 out of 6	9.53734					upregulated	1	0.417358	0.6588	upregulated	2	7.01671	0.0009	downregulated	1	0.839474	0.4319	downregulated	1	1.1393	0.32	downregulated	1	1.80344	0.1647
L-type voltage-gated calcium channel complex	GO	2 out of 6	9.50711	upregulated	3	8.34723	0.0002	downregulated	1	2.06234	0.1272	upregulated	2	3.22222	0.0399
vitamin transmembrane transporter activity	GO	3 out of 6	9.43992	upregulated	1	1.77468	0.1695	downregulated	1	1.06991	0.343	downregulated	1	0.259254	0.7716					downregulated	3	5.63587	0.0036	downregulated	2	3.35854	0.0348
positive regulation of nuclear-transcribed mRNA catabolic process, deadenylation-dependent decay	GO	4 out of 6	9.42397					upregulated	2	2.0897	0.1237	upregulated	1	1.35306	0.2584	upregulated	1	4.21049	0.0148					downregulated	1	1.77072	0.1702
monosaccharide binding	GO	3 out of 6	9.35736	downregulated	2	1.07472	0.3414	upregulated	4	2.12577	0.1193	downregulated	4	0.886466	0.4121	downregulated	4	2.24132	0.1063	downregulated	4	7.01303	0.0009	downregulated	4	4.42107	0.012
negative regulation of calcium ion transmembrane transport	GO	5 out of 6	9.35355	upregulated	2	1.42897	0.2396	upregulated	2	1.57652	0.2067	upregulated	2	1.37531	0.2528	upregulated	1	1.71624	0.1797	downregulated	3	3.6205	0.0268	downregulated	2	3.25651	0.0385
rhythmic process	GO	4 out of 6	9.32958	upregulated	20	4.60869	0.01	upregulated	12	4.25218	0.0142	upregulated	10	3.30183	0.0368	upregulated	6	5.2669	0.0052	upregulated	18	3.91721	0.0199	upregulated	14	4.1828	0.0153
negative regulation of cellular response to transforming growth factor beta stimulus	GO	3 out of 6	9.3229	upregulated	1	2.56128	0.0772	upregulated	4	4.2282	0.0146	upregulated	6	5.93143	0.0027	downregulated	3	1.1373	0.3207	upregulated	5	1.52475	0.2177	upregulated	2	0.735973	0.479
establishment of vesicle localization	GO	5 out of 6	9.32165	upregulated	13	6.10264	0.0022	upregulated	5	0.183208	0.8326	upregulated	11	3.22872	0.0396	downregulated	10	2.87842	0.0562	downregulated	7	2.26237	0.1041	downregulated	2	0.42312	0.655
RNA polymerase II intronic transcription regulatory region sequence-specific DNA binding	GO	3 out of 6	9.32043	upregulated	2	3.07353	0.0463	upregulated	2	3.73996	0.0238					upregulated	1	3.69858	0.0248	upregulated	1	1.19163	0.3037
pigment cell differentiation	GO	3 out of 6	9.31788	upregulated	2	3.84553	0.0214	upregulated	2	3.48544	0.0306	downregulated	1	0.535548	0.5853					downregulated	1	2.52246	0.0803
scaffold protein binding	GO	5 out of 6	9.31434	upregulated	3	1.31455	0.2686	upregulated	2	2.05214	0.1285	upregulated	6	4.91462	0.0073	upregulated	2	2.08686	0.1241	upregulated	6	2.84637	0.0581	downregulated	2	1.79256	0.1665
mitochondrial inner membrane presequence translocase complex	GO	2 out of 6	9.28164																	downregulated	3	6.74723	0.0012	downregulated	1	2.53441	0.0793
positive regulation of urine volume	GO	4 out of 6	9.19512					upregulated	1	4.09752	0.0166	upregulated	1	1.29928	0.2727	upregulated	1	2.8767	0.0563	downregulated	1	0.921613	0.3979
negative regulation of potassium ion transmembrane transporter activity	GO	5 out of 6	9.10316	upregulated	1	0.983674	0.3739	upregulated	1	3.14583	0.043	upregulated	1	1.39483	0.2479	upregulated	1	3.29365	0.0371	downregulated	1	1.25659	0.2846	upregulated	1	0.97141	0.3785
eating behavior	GO	4 out of 6	9.08335	upregulated	2	3.56741	0.0282	upregulated	1	1.0631	0.3454	upregulated	2	2.75885	0.0634	upregulated	1	1.694	0.1838
copulation	GO	4 out of 6	8.97336	upregulated	1	1.73426	0.1765	upregulated	1	1.38366	0.2507	upregulated	2	3.43556	0.0322	upregulated	1	2.78708	0.0616	upregulated	1	0.367197	0.6927
membrane depolarization during cardiac muscle cell action potential	GO	3 out of 6	8.96374	upregulated	3	5.90407	0.0027	downregulated	1	1.58958	0.204	upregulated	2	2.31252	0.099					upregulated	1	1.40253	0.246	downregulated	2	3.73925	0.0238
vesicle localization	GO	5 out of 6	8.92757	upregulated	13	5.88301	0.0028	upregulated	5	0.165569	0.8474	upregulated	11	3.07183	0.0463	downregulated	10	2.7466	0.0641	downregulated	7	2.15213	0.1162	downregulated	2	0.401638	0.6692
cellular response to amyloid-beta	GO	3 out of 6	8.91482	downregulated	1	1.62249	0.1974	upregulated	1	3.25023	0.0388	upregulated	2	2.2561	0.1048	downregulated	1	0.851704	0.4267	downregulated	3	3.66569	0.0256	downregulated	3	4.47309	0.0114
maintenance of protein location in nucleus	GO	4 out of 6	8.9087	upregulated	2	1.27423	0.2796	upregulated	2	4.41148	0.0121	downregulated	2	0.930464	0.3944	downregulated	1	0.837446	0.4328	downregulated	2	2.63516	0.0717	downregulated	2	2.35574	0.0948
intercellular bridge	GO	3 out of 6	8.83904	upregulated	5	4.64193	0.0096	upregulated	3	3.66358	0.0256	downregulated	4	0.897706	0.4075	upregulated	1	1.69003	0.1845	upregulated	1	0.0950863	0.9093	upregulated	1	0.163713	0.849
negative regulation of extrinsic apoptotic signaling pathway	GO	4 out of 6	8.79684	upregulated	3	1.88	0.1526	upregulated	7	7.32468	0.0007	upregulated	4	2.06219	0.1272	downregulated	7	2.18776	0.1122	upregulated	6	0.543823	0.5805	downregulated	1	0.261554	0.7699
response to radiation	GO	3 out of 6	8.77009	upregulated	17	0.402282	0.6688	upregulated	31	13.3157	1.6e-06	upregulated	15	4.32759	0.0132	downregulated	21	4.37697	0.0126	upregulated	28	1.1492	0.3169	upregulated	21	3.74935	0.0235
channel inhibitor activity	GO	3 out of 6	8.76279	upregulated	4	2.97366	0.0511	upregulated	3	5.44871	0.0043	downregulated	3	0.665527	0.514	downregulated	1	0.44446	0.6412	downregulated	1	1.4504	0.2345
regulation of cardiac conduction	GO	4 out of 6	8.75811	downregulated	1	0.256353	0.7739	upregulated	3	4.52643	0.0108	upregulated	4	2.17103	0.1141	downregulated	3	1.15184	0.3161	downregulated	4	2.50379	0.0818	downregulated	1	0.965046	0.381
sulfotransferase activity	GO	4 out of 6	8.66323	upregulated	2	2.29715	0.1005					upregulated	3	5.61906	0.0036	upregulated	1	1.25697	0.2845	downregulated	2	1.82336	0.1615	upregulated	3	2.33331	0.097
CENP-A containing chromatin organization	GO	2 out of 6	8.62322	upregulated	3	2.33389	0.0969	upregulated	7	9.79667	5.6e-05	upregulated	2	1.8396	0.1589	downregulated	2	2.0697	0.1262	upregulated	1	0.825551	0.438	upregulated	1	0.612085	0.5422
cellular pigmentation	GO	3 out of 6	8.5781	upregulated	4	3.19232	0.0411					upregulated	4	3.40305	0.0333					downregulated	2	1.98273	0.1377
regulation of mRNA polyadenylation	GO	4 out of 6	8.54897	upregulated	1	1.24238	0.2887	upregulated	1	0.977616	0.3762	upregulated	3	5.9379	0.0026	upregulated	1	4.34315	0.013	upregulated	2	1.63775	0.1944	upregulated	2	2.31433	0.0988
regulation of cellular response to oxidative stress	GO	3 out of 6	8.49239	downregulated	5	3.08298	0.0458	upregulated	4	6.88209	0.001	downregulated	5	2.52191	0.0803	downregulated	2	1.26165	0.2832	downregulated	5	4.04576	0.0175	downregulated	3	4.43108	0.0119
regulation of oxidative stress-induced intrinsic apoptotic signaling pathway	GO	4 out of 6	8.49092	upregulated	3	2.16271	0.115					upregulated	1	0.684074	0.5046					downregulated	3	2.90807	0.0546	downregulated	2	2.73607	0.0648
establishment of tissue polarity	GO	4 out of 6	8.47666	upregulated	3	4.39979	0.0123	upregulated	2	2.68208	0.0684	upregulated	2	1.96807	0.1397					downregulated	1	0.644018	0.5252	upregulated	1	1.2173	0.296
vasoconstriction	GO	2 out of 6	8.46195	upregulated	1	3.2221	0.0399	upregulated	2	6.15293	0.0021	downregulated	1	0.31995	0.7262					upregulated	1	0.593125	0.5526
endocrine process	GO	5 out of 6	8.45775	downregulated	3	2.37644	0.0929	upregulated	2	1.07841	0.3401	upregulated	3	2.19456	0.1114	upregulated	3	4.98277	0.0069	downregulated	1	0.609106	0.5438	downregulated	2	1.96934	0.1395
regulation of response to oxidative stress	GO	3 out of 6	8.45392	downregulated	5	2.59392	0.0747	upregulated	4	6.4114	0.0016	downregulated	5	2.40057	0.0907	downregulated	2	1.14241	0.319	downregulated	6	3.85043	0.0213	downregulated	3	4.32898	0.0132
sodium ion import across plasma membrane	GO	4 out of 6	8.42319									upregulated	1	1.73694	0.1761	upregulated	1	2.70527	0.0669	downregulated	1	1.9161	0.1472	downregulated	1	2.06488	0.1268
sodium ion transmembrane transport	GO	4 out of 6	8.41336	upregulated	5	3.35623	0.0349	upregulated	1	0.0790384	0.924	upregulated	4	6.83004	0.0011	downregulated	3	0.844632	0.4297	downregulated	5	2.37477	0.093	upregulated	7	3.3821	0.034
ubiquitin-specific protease binding	GO	5 out of 6	8.38034	upregulated	1	0.898419	0.4072	upregulated	1	0.684635	0.5043	upregulated	1	1.41306	0.2434	upregulated	1	3.31433	0.0364	downregulated	2	2.0699	0.1262
regulation of NMDA receptor activity	GO	4 out of 6	8.36912	upregulated	2	4.1564	0.0157					upregulated	1	1.30077	0.2723					downregulated	1	1.05143	0.3494	downregulated	1	1.86053	0.1556
negative regulation of response to drug	GO	4 out of 6	8.3313	upregulated	3	2.22185	0.1084	upregulated	2	4.4119	0.0121	downregulated	5	4.96776	0.007	downregulated	1	2.13228	0.1186	downregulated	4	5.93033	0.0027	downregulated	1	2.86726	0.0569
presynaptic membrane	GO	4 out of 6	8.32173	upregulated	6	3.60336	0.0272					downregulated	3	2.44499	0.0867	upregulated	1	2.60145	0.0742	downregulated	2	0.777094	0.4597	downregulated	1	1.33982	0.2619
phosphorus-oxygen lyase activity	GO	3 out of 6	8.30943	upregulated	2	6.11885	0.0022					upregulated	1	2.13224	0.1186	upregulated	1	2.00153	0.1351	upregulated	1	1.07427	0.3415	upregulated	1	0.868915	0.4194
chromatin assembly	GO	2 out of 6	8.24792	upregulated	9	3.61304	0.027	upregulated	12	10.3789	3.1e-05	downregulated	7	1.06644	0.3442	downregulated	5	1.70087	0.1825	upregulated	9	1.61736	0.1984	upregulated	5	1.35938	0.2568
cell cycle DNA replication	GO	2 out of 6	8.20317	upregulated	4	5.41972	0.0044	upregulated	4	8.33587	0.0002	downregulated	3	1.83202	0.1601	downregulated	2	1.52587	0.2174	upregulated	1	0.742078	0.4761	upregulated	2	1.45245	0.234
regulation of calcium ion transmembrane transport	GO	4 out of 6	8.20048	upregulated	10	5.30233	0.005	downregulated	2	3.84758	0.0213	downregulated	7	2.464	0.0851	upregulated	1	0.655263	0.5193	downregulated	8	4.56411	0.0104	downregulated	4	3.99037	0.0185
regulation of urine volume	GO	4 out of 6	8.16014					upregulated	1	3.69611	0.0248	upregulated	1	1.06783	0.3438	upregulated	1	2.60627	0.0738	downregulated	1	0.789921	0.4539
peptide hormone secretion	GO	5 out of 6	8.12973	upregulated	1	0.366602	0.6931					upregulated	3	2.60406	0.074	upregulated	1	1.41068	0.244	downregulated	3	1.88512	0.1518	downregulated	1	1.86328	0.1552
positive regulation of protein targeting to mitochondrion	GO	4 out of 6	8.11999	upregulated	2	0.842821	0.4305					upregulated	1	0.897687	0.4075	downregulated	2	1.04016	0.3534	downregulated	4	3.6397	0.0263	downregulated	3	3.77994	0.0228
cyclase activity	GO	3 out of 6	8.09843	upregulated	2	6.0257	0.0024					upregulated	1	2.049	0.1289	upregulated	1	1.91913	0.1467	upregulated	1	1.04955	0.3501	upregulated	1	0.845844	0.4292
postsynaptic density membrane	GO	3 out of 6	8.09657	upregulated	1	3.53791	0.0291					upregulated	1	2.44078	0.0871									downregulated	1	2.11788	0.1203
regulation of neurotransmitter receptor activity	GO	4 out of 6	8.0129	upregulated	3	3.12575	0.0439	downregulated	3	2.74094	0.0645	upregulated	3	4.36794	0.0127					downregulated	2	1.98797	0.137	downregulated	1	1.27217	0.2802
positive regulation of viral release from host cell	GO	4 out of 6	7.96438	upregulated	1	1.25966	0.2838	upregulated	3	5.24485	0.0053	upregulated	1	1.41871	0.242					upregulated	2	3.00412	0.0496	downregulated	1	3.04527	0.0476
hormone biosynthetic process	GO	4 out of 6	7.96108	upregulated	1	1.20094	0.3009	upregulated	2	1.84611	0.1578	upregulated	2	2.15036	0.1164	downregulated	4	2.27721	0.1026	upregulated	5	1.51164	0.2205	downregulated	4	4.27531	0.0139
postsynaptic specialization membrane	GO	3 out of 6	7.94746	upregulated	1	3.49655	0.0303					upregulated	1	2.40072	0.0907									downregulated	1	2.05019	0.1287
cellular potassium ion transport	GO	4 out of 6	7.90526	upregulated	8	3.66833	0.0255	upregulated	2	4.52834	0.0108	downregulated	6	1.78784	0.1673	upregulated	3	3.65999	0.0257	downregulated	4	2.36948	0.0935	upregulated	3	4.53304	0.0107
potassium ion transmembrane transport	GO	4 out of 6	7.90526	upregulated	8	3.66833	0.0255	upregulated	2	4.52834	0.0108	downregulated	6	1.78784	0.1673	upregulated	3	3.65999	0.0257	downregulated	4	2.36948	0.0935	upregulated	3	4.53304	0.0107
alcohol catabolic process	GO	5 out of 6	7.89643	upregulated	1	0.362506	0.6959	upregulated	2	1.96052	0.1408	downregulated	2	0.834998	0.4339	upregulated	1	2.34328	0.096	downregulated	4	3.00746	0.0494	downregulated	1	1.05766	0.3473
carboxylic acid binding	GO	3 out of 6	7.88813	downregulated	3	4.1344	0.016	upregulated	12	9.2735	9.4e-05	downregulated	11	4.82353	0.008	downregulated	9	4.51587	0.0109	downregulated	9	6.84549	0.0011	downregulated	9	5.24293	0.0053
regulation of ubiquitin-dependent protein catabolic process	GO	4 out of 6	7.88567	upregulated	12	2.36606	0.0939	upregulated	6	1.60098	0.2017	downregulated	12	2.40449	0.0903	upregulated	2	1.71872	0.1793	downregulated	11	5.03141	0.0065	upregulated	4	0.427017	0.6525
G-protein coupled serotonin receptor signaling pathway	GO	3 out of 6	7.86751	upregulated	1	3.75677	0.0234	downregulated	1	2.93877	0.0529	upregulated	2	5.54917	0.0039					downregulated	1	1.50035	0.2231
apical dendrite	GO	4 out of 6	7.83585	upregulated	1	1.58316	0.2053					downregulated	1	1.88353	0.1521	upregulated	1	4.31976	0.0133	downregulated	2	2.39865	0.0908	downregulated	1	1.4178	0.2422
IRE1-mediated unfolded protein response	GO	4 out of 6	7.8274	upregulated	1	0.976655	0.3766	downregulated	1	0.731349	0.4813	upregulated	4	3.18561	0.0414	downregulated	2	1.47375	0.2291	downregulated	4	3.36435	0.0346	downregulated	3	2.50589	0.0816
establishment of skin barrier	GO	3 out of 6	7.77038	upregulated	1	1.65796	0.1905					downregulated	1	0.388522	0.6781					downregulated	1	2.82975	0.059	downregulated	1	3.67119	0.0254
regulation of cellular response to heat	GO	4 out of 6	7.72738	upregulated	5	6.49103	0.0015	upregulated	1	0.630979	0.5321	downregulated	3	2.41414	0.0894	downregulated	3	3.68687	0.0251	downregulated	4	5.75252	0.0032	downregulated	1	0.953858	0.3853
ciliary basal body	GO	4 out of 6	7.6338	upregulated	12	5.57714	0.0038	downregulated	2	1.9001	0.1496	upregulated	4	1.91191	0.1478	upregulated	1	1.06667	0.3442	downregulated	2	2.03143	0.1311	upregulated	3	1.05325	0.3488
neuromuscular process	GO	5 out of 6	7.62705	upregulated	3	3.0281	0.0484	upregulated	1	0.0259464	0.9744	upregulated	3	1.29667	0.2734	upregulated	1	1.73808	0.1759	upregulated	4	0.306856	0.7358	downregulated	2	1.8451	0.158
nucleotide-sugar metabolic process	GO	4 out of 6	7.59991	upregulated	3	1.62747	0.1964	upregulated	3	4.10813	0.0164	upregulated	2	2.339	0.0964					downregulated	1	0.505487	0.6032	upregulated	1	0.980178	0.3752
response to anesthetic	GO	4 out of 6	7.5941	upregulated	4	3.9939	0.0184	downregulated	1	2.21102	0.1096	upregulated	4	4.13944	0.0159	downregulated	2	0.510042	0.6005	downregulated	1	1.00622	0.3656	downregulated	1	1.17561	0.3086
regulation of glutamate receptor signaling pathway	GO	4 out of 6	7.57584	upregulated	4	4.97401	0.0069	downregulated	3	2.91219	0.0544	upregulated	1	0.6126	0.5419	downregulated	1	0.229277	0.7951	downregulated	3	3.85853	0.0211	downregulated	1	1.27217	0.2802
fear response	GO	1 out of 6	7.55747	downregulated	2	1.41434	0.2431	downregulated	1	1.0759	0.341	upregulated	4	10.5277	2.7e-05									upregulated	1	0.479963	0.6188
positive regulation of long-term synaptic potentiation	GO	3 out of 6	7.55198					downregulated	1	1.29153	0.2749	upregulated	1	2.70822	0.0667					downregulated	3	4.22057	0.0147	downregulated	1	1.91471	0.1474
ER membrane protein complex	GO	4 out of 6	7.51946					upregulated	1	1.4387	0.2372	upregulated	1	1.49302	0.2247					downregulated	1	2.31815	0.0985	downregulated	1	2.26957	0.1034
vacuolar membrane	GO	2 out of 6	7.49203	upregulated	16	3.99927	0.0183	upregulated	21	5.36863	0.0047	downregulated	43	27.8604	7.9e-13	downregulated	35	24.4563	2.4e-11	downregulated	17	5.93054	0.0027	downregulated	6	1.56148	0.2098
regulation of extrinsic apoptotic signaling pathway	GO	3 out of 6	7.45234	upregulated	6	1.18027	0.3072	upregulated	9	8.95251	0.0001	upregulated	5	1.30819	0.2703	downregulated	10	2.13265	0.1185	upregulated	11	0.584107	0.5576	upregulated	8	1.27187	0.2803
microtubule	GO	2 out of 6	7.43424	upregulated	22	1.39693	0.2474	upregulated	13	1.44119	0.2366	downregulated	45	11.3016	1.2e-05	downregulated	27	6.95558	0.001	downregulated	20	7.04067	0.0009	downregulated	5	0.393573	0.6746
long-chain fatty acid import	GO	2 out of 6	7.42367					upregulated	2	3.02022	0.0488	upregulated	2	4.40345	0.0122
ubiquitin-like protein ligase activity	GO	4 out of 6	7.39827	upregulated	18	2.60675	0.0738	upregulated	16	4.76766	0.0085	downregulated	19	2.78729	0.0616	downregulated	12	2.36104	0.0943	downregulated	6	1.81357	0.1631	downregulated	4	3.35862	0.0348
retrograde vesicle-mediated transport, Golgi to ER	GO	4 out of 6	7.37983	upregulated	1	0.207417	0.8127	upregulated	5	1.88515	0.1518	upregulated	2	0.486715	0.6146	downregulated	4	1.31806	0.2677	downregulated	8	6.11861	0.0022
proton-transporting V-type ATPase complex	GO	3 out of 6	7.35022	upregulated	1	0.394074	0.6743									downregulated	1	0.667563	0.513	downregulated	2	5.62069	0.0036	downregulated	1	2.00302	0.1349
calcium-mediated signaling using intracellular calcium source	GO	3 out of 6	7.32827					downregulated	1	4.48865	0.0112	upregulated	3	6.43621	0.0016					downregulated	2	3.90875	0.0201	downregulated	1	1.47196	0.2295
positive regulation of dendrite development	GO	4 out of 6	7.2959	upregulated	5	0.74784	0.4734	upregulated	4	1.54365	0.2136	downregulated	6	5.22847	0.0054	upregulated	4	6.66434	0.0013	downregulated	4	3.56854	0.0282
oxidoreductase activity, acting on the aldehyde or oxo group of donors, NAD or NADP as acceptor	GO	4 out of 6	7.27146	upregulated	1	0.595596	0.5512	upregulated	1	0.650907	0.5216	upregulated	1	0.9022	0.4057					downregulated	3	5.64395	0.0035	upregulated	1	0.521192	0.5938
neuropeptide receptor binding	GO	2 out of 6	7.26913	upregulated	1	3.8127	0.0221					upregulated	1	3.45643	0.0315
drug transmembrane transporter activity	GO	3 out of 6	7.26601	upregulated	4	1.82439	0.1613	upregulated	2	2.89922	0.0551	upregulated	3	5.72758	0.0033	downregulated	2	1.57574	0.2069	downregulated	4	2.88411	0.0559	upregulated	4	1.60943	0.2
response to topologically incorrect protein	GO	4 out of 6	7.25687	downregulated	4	3.66935	0.0255	upregulated	8	1.02894	0.3574	upregulated	7	1.90601	0.1487	downregulated	4	0.212141	0.8089	downregulated	9	3.77746	0.0229	downregulated	7	4.42594	0.012
chaperone binding	GO	3 out of 6	7.23225	upregulated	5	1.35385	0.2582	downregulated	2	0.515961	0.5969	downregulated	8	3.7505	0.0235	downregulated	2	0.241805	0.7852	downregulated	6	6.39347	0.0017	downregulated	4	3.9932	0.0184
small-subunit processome	GO	3 out of 6	7.22171	upregulated	2	0.977713	0.3762	upregulated	2	2.18709	0.1122									downregulated	4	4.0569	0.0173
cellular response to topologically incorrect protein	GO	4 out of 6	7.1472	downregulated	3	2.60425	0.074	upregulated	6	0.832202	0.4351	upregulated	6	1.88486	0.1519	downregulated	3	0.367132	0.6927	downregulated	7	3.15078	0.0428	downregulated	6	4.25073	0.0143
grooming behavior	GO	3 out of 6	7.12071	upregulated	1	2.70349	0.067					upregulated	1	1.86574	0.1548	upregulated	1	3.01118	0.0492	upregulated	1	0.459703	0.6315
negative regulation of signaling receptor activity	GO	3 out of 6	7.05401	downregulated	3	2.09069	0.1236					upregulated	4	4.17392	0.0154	upregulated	2	4.36191	0.0128	downregulated	2	0.608879	0.544
vesicle docking involved in exocytosis	GO	2 out of 6	7.05399	upregulated	4	8.44721	0.0002	upregulated	1	3.07039	0.0464	downregulated	2	0.269698	0.7636	downregulated	1	0.835979	0.4334	upregulated	2	2.29101	0.1012	upregulated	1	1.06692	0.3441
regulation of potassium ion transmembrane transporter activity	GO	5 out of 6	7.05283	upregulated	4	1.56207	0.2097	downregulated	3	2.38855	0.0918	upregulated	3	2.40439	0.0903	upregulated	1	2.29269	0.101	downregulated	2	1.04495	0.3517	downregulated	2	2.13728	0.118
chaperone-mediated protein transport	GO	4 out of 6	7.03885	upregulated	1	0.912338	0.4016	upregulated	1	1.12365	0.3251									downregulated	1	2.76666	0.0629	downregulated	1	2.2362	0.1069
phosphatidylglycerol acyl-chain remodeling	GO	4 out of 6	6.96293	upregulated	1	0.834992	0.4339	downregulated	1	1.37323	0.2533	upregulated	1	1.86356	0.1551					downregulated	1	2.10371	0.122	downregulated	1	3.5339	0.0292
RNA phosphodiester bond hydrolysis, exonucleolytic	GO	3 out of 6	6.94479	upregulated	4	2.58724	0.0752	upregulated	5	5.4251	0.0044	downregulated	4	1.08002	0.3396	downregulated	3	1.92153	0.1464	downregulated	1	0.85398	0.4257
regulation of delayed rectifier potassium channel activity	GO	3 out of 6	6.90404	upregulated	2	2.47924	0.0838													downregulated	1	1.22565	0.2936	downregulated	1	3.19915	0.0408
response to unfolded protein	GO	4 out of 6	6.89717	downregulated	3	4.10234	0.0165	upregulated	8	1.55515	0.2112	upregulated	6	1.68415	0.1856	downregulated	4	0.315496	0.7294	downregulated	8	4.24841	0.0143	downregulated	6	3.82729	0.0218
neuropeptide binding	GO	2 out of 6	6.88588	upregulated	1	4.14601	0.0158					downregulated	1	0.434128	0.6478					downregulated	1	3.17399	0.0418
regulation of heart morphogenesis	GO	4 out of 6	6.8563	upregulated	5	4.22725	0.0146	upregulated	1	0.695342	0.4989	upregulated	3	2.84545	0.0581	downregulated	2	2.12108	0.1199	upregulated	1	0.184326	0.8317	downregulated	1	1.39366	0.2482
amine binding	GO	2 out of 6	6.83782	upregulated	1	4.62313	0.0098													downregulated	1	2.21469	0.1092
ubiquitin-like protein binding	GO	5 out of 6	6.82456	upregulated	7	1.16412	0.3122	upregulated	5	1.14372	0.3186	upregulated	4	2.75744	0.0635	downregulated	3	0.43197	0.6492	downregulated	5	1.66073	0.19	downregulated	1	0.530519	0.5883
neurexin family protein binding	GO	3 out of 6	6.80111	upregulated	1	1.40707	0.2449	upregulated	1	4.32254	0.0133	upregulated	1	1.96962	0.1395					upregulated	1	0.898128	0.4073
regulation of TORC1 signaling	GO	3 out of 6	6.80093	upregulated	3	4.90055	0.0074	upregulated	3	5.60003	0.0037	upregulated	1	1.2601	0.2836	downregulated	4	5.1257	0.0059	upregulated	2	1.21964	0.2953	downregulated	1	2.64569	0.071
hydro-lyase activity	GO	3 out of 6	6.78863	downregulated	2	3.51702	0.0297					upregulated	1	0.742565	0.4759	downregulated	2	0.788117	0.4547	downregulated	6	7.24785	0.0007	downregulated	2	3.10335	0.0449
positive regulation of viral life cycle	GO	4 out of 6	6.77775	upregulated	2	0.265434	0.7669	upregulated	5	4.3092	0.0134	downregulated	3	1.4157	0.2428	downregulated	1	1.29834	0.273	downregulated	4	2.20618	0.1101	downregulated	2	2.71098	0.0665
regulation of synaptic vesicle transport	GO	4 out of 6	6.75303	upregulated	3	1.71058	0.1808					upregulated	3	3.01561	0.049	downregulated	1	1.16132	0.3131	downregulated	2	1.95731	0.1412	downregulated	1	1.23085	0.292
neurotransmitter receptor activity involved in regulation of postsynaptic membrane potential	GO	2 out of 6	6.75062	upregulated	2	5.6122	0.0037									downregulated	1	1.07863	0.3401					downregulated	1	2.21705	0.1089
transmitter-gated ion channel activity involved in regulation of postsynaptic membrane potential	GO	2 out of 6	6.75062	upregulated	2	5.6122	0.0037									downregulated	1	1.07863	0.3401					downregulated	1	2.21705	0.1089
regulation of IRE1-mediated unfolded protein response	GO	2 out of 6	6.74957									upregulated	2	3.54792	0.0288					downregulated	1	3.20164	0.0407
ribonuclease P complex	GO	3 out of 6	6.74106	upregulated	1	1.56871	0.2083					upregulated	2	4.35173	0.0129	downregulated	1	1.27449	0.2796	downregulated	1	2.09511	0.1231
retinol binding	GO	3 out of 6	6.73053	upregulated	1	2.54825	0.0782					upregulated	1	1.77097	0.1702	upregulated	1	2.41131	0.0897
oxidoreductase activity, acting on diphenols and related substances as donors	GO	2 out of 6	6.70059																	downregulated	1	3.18601	0.0413	downregulated	1	3.51457	0.0298
voltage-gated potassium channel complex	GO	3 out of 6	6.69776	upregulated	6	7.4807	0.0006					downregulated	3	2.55337	0.0778	downregulated	2	1.5971	0.2025	downregulated	2	2.81532	0.0599	downregulated	1	0.55222	0.5757
mitotic cell cycle phase transition	GO	2 out of 6	6.6673	upregulated	21	5.12675	0.0059	upregulated	26	20.5791	1.2e-09	downregulated	26	5.14984	0.0058	downregulated	18	5.88924	0.0028	upregulated	18	3.99971	0.0183	upregulated	11	3.99971	0.0183
positive regulation of oxidative stress-induced cell death	GO	3 out of 6	6.6615	downregulated	2	2.97084	0.0513	upregulated	1	3.90022	0.0202	downregulated	1	0.217841	0.8043					downregulated	3	4.39057	0.0124	downregulated	1	1.55939	0.2103
tetrahydrofolate interconversion	GO	2 out of 6	6.65647					upregulated	1	6.40112	0.0017	downregulated	2	1.18189	0.3067					downregulated	1	1.43724	0.2376	downregulated	1	3.29242	0.0372
organ growth	GO	4 out of 6	6.64596	downregulated	7	3.89353	0.0204	upregulated	1	0.224474	0.7989	upregulated	8	4.22149	0.0147	upregulated	3	5.48406	0.0042	downregulated	2	1.66914	0.1884	upregulated	3	1.05967	0.3466
regulation of glial cell migration	GO	1 out of 6	6.63314					upregulated	2	10.6044	2.5e-05	downregulated	1	1.97628	0.1386	downregulated	1	1.99493	0.136
metaphase plate congression	GO	2 out of 6	6.58174	upregulated	5	3.65812	0.0258	upregulated	5	3.89	0.0204	downregulated	2	0.459301	0.6317	downregulated	1	0.261945	0.7696					upregulated	1	0.24514	0.7826
natural killer cell mediated cytotoxicity	GO	4 out of 6	6.50063	downregulated	1	1.52317	0.218	upregulated	1	0.748639	0.473	upregulated	1	0.727874	0.4829	upregulated	1	2.61757	0.073	downregulated	2	3.92971	0.0196
deacetylase activity	GO	4 out of 6	6.50039	upregulated	6	4.71406	0.009	upregulated	2	1.35551	0.2578	downregulated	3	0.266921	0.7657	upregulated	2	2.23877	0.1066	upregulated	8	4.43677	0.0118	downregulated	1	2.89573	0.0553
vesicle docking	GO	2 out of 6	6.4873	upregulated	5	7.61816	0.0005	upregulated	3	4.43186	0.0119	downregulated	4	0.455545	0.6341	downregulated	2	0.843805	0.4301	upregulated	5	2.7947	0.0611	upregulated	3	1.46866	0.2302
regulation of synaptic vesicle exocytosis	GO	4 out of 6	6.46742	upregulated	2	0.99181	0.3709					upregulated	3	3.32933	0.0358	downregulated	1	1.2665	0.2818	downregulated	2	2.10507	0.1218	downregulated	1	1.30771	0.2704
retinal binding	GO	3 out of 6	6.46714	upregulated	1	2.40486	0.0903					upregulated	1	1.71244	0.1804	upregulated	1	2.34984	0.0954
mitotic metaphase plate congression	GO	2 out of 6	6.46611	upregulated	4	3.07924	0.046	upregulated	5	4.72923	0.0088	downregulated	2	0.658793	0.5175	downregulated	1	0.363311	0.6954					upregulated	1	0.320258	0.726
sarcoplasm	GO	4 out of 6	6.43744	upregulated	3	2.35293	0.0951	downregulated	1	2.63407	0.0718	upregulated	5	2.66585	0.0695	upregulated	1	2.41741	0.0892	downregulated	5	3.67242	0.0254	upregulated	3	2.03711	0.1304
tRNA 5'-end processing	GO	3 out of 6	6.42196	upregulated	1	1.41563	0.2428					upregulated	2	4.11542	0.0163	downregulated	1	1.12947	0.3232	downregulated	1	2.02038	0.1326
positive regulation of cellular response to oxidative stress	GO	3 out of 6	6.38303	downregulated	2	2.9061	0.0547	upregulated	1	3.77638	0.0229	downregulated	1	0.203668	0.8157					downregulated	3	4.21406	0.0148	downregulated	1	1.50236	0.2226
MKS complex	GO	3 out of 6	6.34804	upregulated	4	5.68424	0.0034	downregulated	1	2.39737	0.091					upregulated	1	2.17699	0.1134	downregulated	1	2.73665	0.0648	upregulated	1	1.85247	0.1568
modified amino acid binding	GO	5 out of 6	6.33755	upregulated	3	1.15652	0.3146	upregulated	3	6.30373	0.0018	upregulated	3	1.00775	0.365	downregulated	3	5.89371	0.0028	downregulated	3	2.06697	0.1266	downregulated	2	1.69629	0.1834
xenobiotic metabolic process	GO	5 out of 6	6.32693	upregulated	4	0.498111	0.6077	upregulated	1	0.0780723	0.9249	downregulated	5	0.398796	0.6711	upregulated	2	1.88269	0.1522	downregulated	5	2.76903	0.0627	downregulated	3	1.49782	0.2236
structural constituent of cytoskeleton	GO	2 out of 6	6.28264	downregulated	1	0.907895	0.4034	upregulated	1	1.61721	0.1985	upregulated	2	1.66517	0.1892	upregulated	3	4.32265	0.0133	downregulated	6	4.32928	0.0132	downregulated	3	1.95336	0.1418
mitochondrial intermembrane space	GO	2 out of 6	6.2428	upregulated	5	1.48119	0.2274	upregulated	3	2.25063	0.1053	downregulated	6	3.06148	0.0468	downregulated	3	2.30713	0.0995	downregulated	6	4.92472	0.0073	downregulated	2	1.31808	0.2676
positive regulation of response to oxidative stress	GO	3 out of 6	6.23795	downregulated	2	2.84395	0.0582	upregulated	1	3.66648	0.0256	downregulated	1	0.190507	0.8265					downregulated	3	4.13059	0.0161	downregulated	1	1.47534	0.2287
growth factor activity	GO	3 out of 6	6.23512	upregulated	6	2.34758	0.0956	upregulated	9	5.39446	0.0045	upregulated	4	1.39348	0.2482	downregulated	4	2.13071	0.1188	upregulated	9	0.118314	0.8884	upregulated	6	0.65138	0.5213
negative regulation of proteasomal protein catabolic process	GO	4 out of 6	6.22733	upregulated	5	2.98658	0.0505	upregulated	2	0.978999	0.3757	upregulated	3	1.41594	0.2427	upregulated	1	1.88422	0.1519	downregulated	3	2.04292	0.1296	upregulated	2	1.0384	0.354
homologous chromosome segregation	GO	4 out of 6	6.21375	upregulated	2	0.906329	0.404	upregulated	5	3.75629	0.0234	upregulated	1	1.29484	0.2739	downregulated	1	0.236587	0.7893	upregulated	3	1.27401	0.2797	downregulated	1	1.76688	0.1709
myoblast fusion	GO	3 out of 6	6.17494	upregulated	1	1.3355	0.263					downregulated	1	0.584412	0.5574	downregulated	1	1.09641	0.3341	downregulated	2	3.84394	0.0214	downregulated	1	2.67632	0.0688
calcium-dependent cell-cell adhesion via plasma membrane cell adhesion molecules	GO	3 out of 6	6.16146	upregulated	4	4.13147	0.0161	upregulated	1	2.05927	0.1275	upregulated	2	4.30188	0.0135					upregulated	2	2.90554	0.0547	upregulated	1	1.42562	0.2404
arginine metabolic process	GO	3 out of 6	6.10364									upregulated	1	1.90991	0.1481					downregulated	1	2.67986	0.0686	downregulated	1	1.51387	0.2201
positive regulation of protein depolymerization	GO	5 out of 6	6.08525	upregulated	1	1.13166	0.3225	upregulated	1	2.26145	0.1042	upregulated	2	2.24949	0.1055	upregulated	1	1.7117	0.1806	downregulated	1	1.81816	0.1623	upregulated	1	3.08722	0.0456
histone methyltransferase complex	GO	5 out of 6	6.08007	upregulated	6	2.0346	0.1307	upregulated	4	1.59428	0.2031	upregulated	1	0.611329	0.5426	upregulated	1	1.12385	0.325	upregulated	9	1.6864	0.1852	downregulated	1	2.40241	0.0905
muscle filament sliding	GO	4 out of 6	6.0693	upregulated	2	1.47092	0.2297	downregulated	1	1.35795	0.2572	upregulated	1	0.896398	0.408	upregulated	2	4.87696	0.0076	downregulated	2	1.62301	0.1973	upregulated	1	1.44003	0.2369
selective autophagy	GO	4 out of 6	6.05445	upregulated	1	0.561658	0.5703					upregulated	1	4.52591	0.0108	downregulated	2	1.38756	0.2497	downregulated	1	0.638201	0.5282	downregulated	1	1.71624	0.1797
positive regulation of cell size	GO	3 out of 6	6.04717					upregulated	1	1.40701	0.2449	upregulated	1	1.35327	0.2584					downregulated	2	3.28689	0.0374
regulation of cell maturation	GO	3 out of 6	6.04567	downregulated	1	1.15344	0.3155	upregulated	1	3.79504	0.0225	downregulated	2	1.42573	0.2403					downregulated	2	1.78967	0.167	downregulated	2	3.04013	0.0478
transferase activity, transferring pentosyl groups	GO	4 out of 6	6.04272	upregulated	3	1.05615	0.3478	upregulated	2	0.946241	0.3882	upregulated	1	2.92772	0.0535	upregulated	1	1.82344	0.1615	upregulated	1	0.710835	0.4912
microtubule anchoring at microtubule organizing center	GO	3 out of 6	6.02614					upregulated	1	3.36469	0.0346	upregulated	1	1.13137	0.3226	upregulated	1	2.24876	0.1055	upregulated	1	0.718677	0.4874
heat shock protein binding	GO	3 out of 6	6.00164	downregulated	2	2.34012	0.0963	upregulated	3	2.23743	0.1067	downregulated	8	3.83648	0.0216	upregulated	1	3.42617	0.0325	downregulated	8	5.49498	0.0041	downregulated	3	2.10571	0.1218
inositol phosphate phosphatase activity	GO	4 out of 6	5.99477	upregulated	2	1.81646	0.1626	downregulated	1	1.0329	0.356	downregulated	2	2.19238	0.1117	upregulated	1	3.04307	0.0477	downregulated	2	3.11791	0.0442	downregulated	1	1.24261	0.2886
regulation of microtubule polymerization or depolymerization	GO	4 out of 6	5.98648	upregulated	6	3.4315	0.0323	upregulated	3	0.919243	0.3988	downregulated	8	1.85669	0.1562	downregulated	3	0.745353	0.4746	downregulated	3	2.09046	0.1236	downregulated	2	2.14733	0.1168
cullin family protein binding	GO	3 out of 6	5.97262	upregulated	2	1.35756	0.2573					upregulated	2	2.4694	0.0846					downregulated	2	4.02601	0.0178	upregulated	1	1.88035	0.1525
photoreceptor cell cilium	GO	4 out of 6	5.97211	upregulated	5	2.26633	0.1037	upregulated	4	1.12749	0.3238	downregulated	4	0.944994	0.3887	downregulated	1	0.25262	0.7768	downregulated	5	2.73695	0.0648	downregulated	1	1.03895	0.3538
negative regulation of mRNA catabolic process	GO	3 out of 6	5.9648	upregulated	7	5.25436	0.0052	upregulated	1	0.818303	0.4412	downregulated	4	0.927746	0.3954	upregulated	1	1.1466	0.3177	upregulated	2	0.201508	0.8175	downregulated	1	0.693103	0.5
guanyl-nucleotide exchange factor complex	GO	2 out of 6	5.95586	upregulated	4	7.03718	0.0009	upregulated	1	3.85334	0.0212	downregulated	3	3.19295	0.0411	downregulated	1	1.74171	0.1752
caveola	GO	2 out of 6	5.94089	upregulated	3	2.21929	0.1087	upregulated	5	9.77661	5.7e-05	upregulated	6	4.8049	0.0082	downregulated	4	2.02212	0.1324	downregulated	5	2.29899	0.1004	downregulated	3	3.6419	0.0262
cellular response to virus	GO	3 out of 6	5.92974	downregulated	1	1.01151	0.3637	upregulated	2	2.03579	0.1306	upregulated	1	4.51094	0.011	downregulated	1	0.446955	0.6396	upregulated	4	2.33039	0.0973	downregulated	1	3.17187	0.0419
cyclosporin A binding	GO	2 out of 6	5.91712									upregulated	1	1.19155	0.3037					downregulated	1	1.07308	0.342	downregulated	2	4.84404	0.0079
positive regulation of voltage-gated potassium channel activity	GO	2 out of 6	5.91524																	downregulated	1	1.96524	0.1401	downregulated	1	3.95001	0.0193
9+0 non-motile cilium	GO	4 out of 6	5.90797	upregulated	5	2.24536	0.1059	upregulated	4	1.11977	0.3264	downregulated	4	0.930417	0.3944	downregulated	1	0.248565	0.7799	downregulated	5	2.69453	0.0676	downregulated	1	1.02729	0.358
synaptic vesicle exocytosis	GO	4 out of 6	5.90495	upregulated	3	4.01069	0.0181	upregulated	1	0.380528	0.6835	upregulated	4	3.29875	0.0369	downregulated	2	1.66505	0.1892	upregulated	2	2.76601	0.0629	downregulated	2	2.64605	0.0709
estrous cycle	GO	3 out of 6	5.90331	upregulated	1	1.28865	0.2756	upregulated	2	4.79189	0.0083	downregulated	1	3.05205	0.0473									downregulated	1	2.87482	0.0564
preribosome	GO	2 out of 6	5.8807	upregulated	2	0.371569	0.6897	upregulated	4	2.63338	0.0718									downregulated	7	5.50913	0.004
viral budding via host ESCRT complex	GO	4 out of 6	5.8499	upregulated	1	1.18004	0.3073	upregulated	2	2.36984	0.0935	upregulated	1	1.2624	0.283					downregulated	1	1.03762	0.3543
negative regulation of transcription from RNA polymerase II promoter in response to stress	GO	3 out of 6	5.84037	upregulated	1	2.30464	0.0998	upregulated	2	3.48906	0.0305	upregulated	1	2.3214	0.0981	downregulated	1	1.75591	0.1727	upregulated	1	0.518829	0.5952
racemase and epimerase activity	GO	3 out of 6	5.83761	upregulated	2	2.39788	0.0909	upregulated	2	3.2905	0.0372									downregulated	1	1.17505	0.3088	upregulated	1	1.02582	0.3585
oxidoreductase activity, acting on a sulfur group of donors	GO	5 out of 6	5.83358	upregulated	4	1.18329	0.3063	upregulated	2	1.20993	0.2982	upregulated	1	0.233789	0.7915	upregulated	1	1.12102	0.3259	downregulated	4	4.41518	0.0121	upregulated	4	2.32963	0.0973
NAD binding	GO	3 out of 6	5.82301	downregulated	1	1.5744	0.2071	upregulated	2	0.916277	0.4	upregulated	2	1.66204	0.1898	upregulated	2	4.59994	0.0101	downregulated	4	2.53319	0.0794	upregulated	2	0.651995	0.521
positive regulation of glucose import in response to insulin stimulus	GO	2 out of 6	5.79704	upregulated	4	7.22134	0.0007	downregulated	1	1.11492	0.3279	upregulated	1	0.826625	0.4375					upregulated	1	1.136	0.3211
regulation of protein catabolic process	GO	4 out of 6	5.77587	upregulated	23	1.76264	0.1716	upregulated	20	3.89683	0.0203	downregulated	23	2.14669	0.1169	downregulated	17	1.18216	0.3066	downregulated	16	2.32596	0.0977	downregulated	8	1.1193	0.3265
cellular modified amino acid catabolic process	GO	3 out of 6	5.73148					upregulated	2	1.93163	0.1449	upregulated	1	2.51252	0.0811					downregulated	1	1.28732	0.276
ATP-dependent helicase activity	GO	4 out of 6	5.6856	upregulated	1	0.0800098	0.9231	upregulated	6	4.89125	0.0075	downregulated	4	0.331808	0.7176	downregulated	3	1.07495	0.3413	downregulated	2	1.10703	0.3305	downregulated	1	1.01406	0.3627
cadherin binding involved in cell-cell adhesion	GO	3 out of 6	5.6826	downregulated	1	1.71588	0.1798	upregulated	1	1.30719	0.2706	upregulated	2	3.00014	0.0498	upregulated	1	3.09115	0.0454
postsynaptic membrane assembly	GO	2 out of 6	5.6211	upregulated	2	4.34383	0.013					upregulated	1	1.96962	0.1395					upregulated	1	0.692354	0.5004
vitamin transport	GO	4 out of 6	5.56372	upregulated	1	1.41913	0.2419	downregulated	1	0.764691	0.4655	downregulated	2	4.14588	0.0158	upregulated	1	1.73433	0.1765	downregulated	3	4.68878	0.0092	downregulated	2	2.63204	0.0719
positive regulation of calcium ion transmembrane transporter activity	GO	3 out of 6	5.55712	upregulated	5	8.38666	0.0002	downregulated	1	3.55172	0.0287	downregulated	2	2.35086	0.0953	downregulated	1	0.69787	0.4976	downregulated	2	1.38603	0.2501	downregulated	1	2.38488	0.0921
cellular response to fibroblast growth factor stimulus	GO	3 out of 6	5.55321	upregulated	9	4.87639	0.0076	upregulated	5	1.64546	0.1929	upregulated	7	4.35131	0.0129	downregulated	4	2.85379	0.0576	upregulated	6	1.47614	0.2285	upregulated	3	0.99002	0.3716
endoplasmic reticulum tubular network	GO	2 out of 6	5.53318	upregulated	5	6.34038	0.0018					downregulated	1	0.336778	0.7141	downregulated	2	1.35366	0.2583	downregulated	1	0.883239	0.4134
positive regulation of proteasomal protein catabolic process	GO	4 out of 6	5.52616	upregulated	7	1.86947	0.1542	upregulated	6	2.65153	0.0705	downregulated	8	2.28251	0.102	downregulated	4	0.615762	0.5402	downregulated	6	2.38184	0.0924	downregulated	3	1.52159	0.2184
ubiquitin conjugating enzyme activity	GO	3 out of 6	5.5259	upregulated	6	3.088	0.0456	upregulated	3	2.24593	0.1058	upregulated	2	1.40601	0.2451	downregulated	2	0.639568	0.5275	upregulated	1	0.166239	0.8468	upregulated	1	0.408242	0.6648
angiotensin-activated signaling pathway	GO	2 out of 6	5.52393					upregulated	1	3.64125	0.0262													downregulated	1	1.88268	0.1522
axon cytoplasm	GO	4 out of 6	5.51075	upregulated	5	2.99264	0.0502	downregulated	2	1.2638	0.2826	upregulated	2	1.54104	0.2142	upregulated	1	1.46225	0.2317	downregulated	2	1.07615	0.3409	downregulated	1	0.778614	0.459
negative regulation of endoplasmic reticulum unfolded protein response	GO	3 out of 6	5.50351					upregulated	1	1.10346	0.3317	upregulated	2	3.86668	0.0209	downregulated	1	1.16589	0.3116	downregulated	1	3.29511	0.0371	upregulated	1	1.59586	0.2027
regulation of retrograde protein transport, ER to cytosol	GO	3 out of 6	5.49769	upregulated	2	3.28854	0.0373	upregulated	1	1.65514	0.1911	downregulated	1	0.484802	0.6158	downregulated	1	1.18975	0.3043	downregulated	1	2.22858	0.1077
execution phase of apoptosis	GO	4 out of 6	5.4901	upregulated	3	1.15111	0.3163	upregulated	3	2.86257	0.0571	downregulated	5	2.24834	0.1056	downregulated	1	0.197854	0.8205	downregulated	2	2.3518	0.0952	downregulated	1	1.57082	0.2079
multivesicular body assembly	GO	4 out of 6	5.48749	upregulated	2	1.58792	0.2044	upregulated	3	2.86336	0.0571	upregulated	1	0.906522	0.4039	downregulated	1	0.617687	0.5392	downregulated	1	0.747376	0.4736
regulation of calcium ion transmembrane transport via high voltage-gated calcium channel	GO	3 out of 6	5.43818	upregulated	2	4.14642	0.0158	upregulated	1	1.73973	0.1756	upregulated	2	2.95168	0.0523					upregulated	1	1.63983	0.194	upregulated	1	1.75982	0.1721
negative regulation of potassium ion transmembrane transport	GO	4 out of 6	5.40995	upregulated	1	0.813871	0.4431	upregulated	1	2.92803	0.0535	upregulated	1	1.2053	0.2996	upregulated	1	3.0751	0.0462	downregulated	2	2.50415	0.0817	upregulated	2	2.61234	0.0734
BMP binding	GO	3 out of 6	5.4003	upregulated	1	1.04887	0.3503	downregulated	1	2.57767	0.076	upregulated	2	4.991	0.0068					downregulated	1	1.9381	0.144
circadian rhythm	GO	4 out of 6	5.38499	upregulated	8	2.25304	0.1051	upregulated	8	4.68925	0.0092	upregulated	7	3.52738	0.0294	upregulated	4	3.9217	0.0198	upregulated	10	4.50319	0.0111	upregulated	9	4.50319	0.0111
Golgi stack	GO	1 out of 6	5.372	upregulated	5	1.93358	0.1446	upregulated	4	1.07241	0.3422	upregulated	5	2.83178	0.0589	downregulated	5	1.13697	0.3208	downregulated	10	6.28429	0.0019	upregulated	5	0.912293	0.4016
disulfide oxidoreductase activity	GO	5 out of 6	5.35419	upregulated	3	1.18022	0.3072	upregulated	1	1.54467	0.2134	upregulated	1	0.410413	0.6634	upregulated	1	1.4288	0.2396	downregulated	3	3.26999	0.038	upregulated	3	2.4799	0.0838
respiratory gaseous exchange	GO	3 out of 6	5.34296	upregulated	2	1.57193	0.2076	upregulated	2	1.73608	0.1762	downregulated	1	2.32205	0.0981	upregulated	2	2.46563	0.085	upregulated	5	1.90763	0.1484	downregulated	2	3.62745	0.0266
Lys63-specific deubiquitinase activity	GO	4 out of 6	5.33189	upregulated	2	1.65042	0.192	upregulated	1	0.730734	0.4816	upregulated	1	1.47054	0.2298					upregulated	1	0.425976	0.6531	downregulated	1	1.90618	0.1486
small ribosomal subunit	GO	4 out of 6	5.28609	upregulated	3	0.483162	0.6168	downregulated	1	0.596508	0.5507	upregulated	3	2.63538	0.0717	upregulated	1	1.63212	0.1955	downregulated	3	1.33511	0.2631	upregulated	1	0.203186	0.8161
negative regulation of ERAD pathway	GO	2 out of 6	5.2728	upregulated	3	4.23777	0.0144	upregulated	1	1.65514	0.1911									upregulated	1	0.620107	0.5379
positive regulation of cyclin-dependent protein kinase activity	GO	3 out of 6	5.26518					downregulated	1	1.28394	0.2769	upregulated	2	2.71006	0.0665	downregulated	2	1.21247	0.2975	downregulated	2	3.9378	0.0195	downregulated	1	1.11373	0.3283
mitotic nuclear division	GO	2 out of 6	5.2592	upregulated	12	4.11284	0.0164	upregulated	13	8.5501	0.0002	downregulated	14	4.07017	0.0171	downregulated	6	1.90877	0.1483	upregulated	6	0.83263	0.4349	upregulated	5	0.592173	0.5531
protein targeting to ER	GO	6 out of 6	5.23	upregulated	2	0.0264677	0.9739	upregulated	2	0.152463	0.8586	upregulated	2	0.229742	0.7947	upregulated	1	1.20243	0.3005	downregulated	6	1.73162	0.177	downregulated	3	1.88727	0.1515
sperm principal piece	GO	3 out of 6	5.22809	upregulated	1	0.648874	0.5226	upregulated	2	3.10522	0.0448	upregulated	1	1.47399	0.229
skeletal muscle fiber development	GO	2 out of 6	5.20705	upregulated	1	4.44264	0.0118	upregulated	1	2.86693	0.0569	downregulated	1	0.42605	0.6531					upregulated	1	1.67648	0.187
RNA polymerase II, holoenzyme	GO	4 out of 6	5.20432	upregulated	4	1.25269	0.2857	upregulated	5	2.47839	0.0839	downregulated	7	1.18539	0.3056	upregulated	1	3.72028	0.0242	upregulated	8	2.04573	0.1293	downregulated	1	0.984087	0.3738
cellular component disassembly involved in execution phase of apoptosis	GO	4 out of 6	5.18916	upregulated	2	1.68712	0.1851	upregulated	2	3.65786	0.0258	downregulated	5	3.23562	0.0393	downregulated	1	0.505484	0.6032	downregulated	1	1.44048	0.2368	downregulated	1	2.14479	0.1171
regulation of response to reactive oxygen species	GO	3 out of 6	5.18069	downregulated	3	2.44068	0.0871	upregulated	3	6.56697	0.0014	downregulated	4	3.49212	0.0304	downregulated	1	1.80789	0.164	downregulated	3	3.56615	0.0283	downregulated	1	2.78826	0.0615
CD4-positive, alpha-beta T cell activation	GO	3 out of 6	5.17654	downregulated	1	0.590184	0.5542	upregulated	1	4.65365	0.0095	downregulated	2	0.366688	0.693					downregulated	1	0.683364	0.5049	downregulated	1	0.796392	0.451
amine biosynthetic process	GO	4 out of 6	5.16531					upregulated	1	0.730734	0.4816	upregulated	2	3.21722	0.0401	downregulated	1	0.899554	0.4068	downregulated	1	0.952442	0.3858	downregulated	1	1.16446	0.3121
dynein complex	GO	4 out of 6	5.15878	upregulated	2	1.27746	0.2787	upregulated	2	1.73608	0.1762	downregulated	4	2.16801	0.1144	upregulated	1	2.27185	0.1031	downregulated	1	2.0414	0.1298
multivesicular body sorting pathway	GO	3 out of 6	5.15587	upregulated	2	3.2247	0.0398	upregulated	3	1.98989	0.1367	upregulated	2	1.50967	0.221	downregulated	1	0.337941	0.7132	upregulated	3	1.23046	0.2922
sulfur compound metabolic process	GO	3 out of 6	5.14257	downregulated	6	0.593761	0.5522	upregulated	12	2.08874	0.1238	upregulated	13	3.95851	0.0191	downregulated	18	4.21332	0.0148	downregulated	17	5.3108	0.0049	downregulated	3	3.9024	0.0202
entrainment of circadian clock	GO	5 out of 6	5.13693	upregulated	1	0.391579	0.676	upregulated	2	1.11751	0.3271	upregulated	2	2.90205	0.0549	upregulated	1	2.21249	0.1094	downregulated	3	2.30079	0.1002	upregulated	4	3.78748	0.0227
cellular response to reactive nitrogen species	GO	3 out of 6	5.10142	upregulated	2	2.85698	0.0574	upregulated	2	3.01635	0.049	upregulated	2	2.03211	0.1311	downregulated	3	2.67051	0.0692	upregulated	1	0.133514	0.875
multivesicular body organization	GO	4 out of 6	5.08057	upregulated	2	1.4617	0.2318	upregulated	3	2.65823	0.0701	upregulated	1	0.841993	0.4309	downregulated	1	0.562108	0.57	downregulated	1	0.680751	0.5062
neurotransmitter binding	GO	4 out of 6	5.06058	upregulated	2	2.86204	0.0572	upregulated	2	2.20014	0.1108	upregulated	2	1.13844	0.3203	upregulated	1	1.56112	0.2099	upregulated	4	3.40126	0.0333	downregulated	3	3.56214	0.0284
organelle fusion	GO	4 out of 6	5.01999	upregulated	8	2.27899	0.1024	upregulated	8	5.45541	0.0043	upregulated	1	0.63616	0.5293	downregulated	5	1.39801	0.2471	downregulated	3	1.61155	0.1996	upregulated	6	3.5641	0.0283
sequence-specific mRNA binding	GO	3 out of 6	5.0128	upregulated	1	1.57342	0.2073	upregulated	2	6.30588	0.0018	upregulated	1	1.45424	0.2336	downregulated	1	1.351	0.259	upregulated	2	2.96974	0.0513
positive regulation of gonad development	GO	2 out of 6	4.95136	upregulated	1	2.64586	0.0709																	downregulated	1	2.3055	0.0997
cell cycle phase transition	GO	2 out of 6	4.94585	upregulated	21	4.73257	0.0088	upregulated	26	19.7784	2.6e-09	downregulated	27	5.24249	0.0053	downregulated	19	6.40972	0.0016	upregulated	19	3.95643	0.0191	upregulated	13	3.95643	0.0191
HOPS complex	GO	3 out of 6	4.93571	upregulated	1	2.66456	0.0696					downregulated	1	0.503328	0.6045	upregulated	1	2.46101	0.0853	downregulated	1	1.46354	0.2314	upregulated	1	1.15007	0.3166
endoplasmic reticulum-Golgi intermediate compartment	GO	2 out of 6	4.92797	upregulated	5	1.17879	0.3077	upregulated	7	2.58585	0.0753	downregulated	8	0.669245	0.5121	downregulated	5	0.652804	0.5206	downregulated	8	3.94952	0.0193	downregulated	1	0.978452	0.3759
response to peptide	GO	3 out of 6	4.90847	downregulated	14	3.24285	0.0391	upregulated	17	11.9458	6.5e-06	downregulated	29	4.22406	0.0146	downregulated	23	6.23794	0.002	downregulated	14	3.92349	0.0198	downregulated	12	2.744	0.0643
negative regulation of cardiac muscle cell differentiation	GO	3 out of 6	4.8766	upregulated	1	1.80704	0.1641					downregulated	1	1.61973	0.198					downregulated	2	2.98014	0.0508	downregulated	1	1.70915	0.181
cytoplasmic side of membrane	GO	2 out of 6	4.87423	upregulated	11	7.29572	0.0007	upregulated	3	1.02295	0.3595	downregulated	14	6.04314	0.0024	upregulated	3	4.66426	0.0094	upregulated	11	2.58191	0.0756	upregulated	3	1.04261	0.3525
subpallium development	GO	3 out of 6	4.87291	upregulated	1	1.74171	0.1752					upregulated	1	0.657126	0.5183	upregulated	1	2.47407	0.0842
nuclear chromosome segregation	GO	4 out of 6	4.87112	upregulated	12	1.97315	0.139	upregulated	16	7.85675	0.0004	upregulated	3	0.844514	0.4298	upregulated	1	0.237069	0.7889	upregulated	15	2.72129	0.0658	upregulated	10	3.31908	0.0362
regulation of multicellular organism growth	GO	3 out of 6	4.86988	downregulated	4	2.20699	0.11	downregulated	1	0.399332	0.6708	upregulated	3	1.04486	0.3517					downregulated	5	2.72495	0.0655	downregulated	4	3.70638	0.0246
ubiquitin-like protein conjugating enzyme binding	GO	4 out of 6	4.85556	upregulated	3	0.78939	0.4541	upregulated	2	0.665964	0.5138	upregulated	2	1.41322	0.2434	downregulated	1	0.750273	0.4722	downregulated	3	2.73726	0.0647
intraciliary retrograde transport	GO	2 out of 6	4.83409	downregulated	1	1.82736	0.1608					upregulated	1	3.0871	0.0456					downregulated	1	3.57435	0.028
cellular detoxification	GO	3 out of 6	4.80945	downregulated	2	1.04714	0.3509	upregulated	6	4.03915	0.0176	downregulated	5	6.36993	0.0017	downregulated	3	3.44958	0.0318	downregulated	6	3.87649	0.0207	downregulated	3	7.76045	0.0004
positive regulation by host of viral process	GO	2 out of 6	4.80136					upregulated	3	6.19866	0.002									upregulated	3	4.01496	0.018	downregulated	1	2.61766	0.073
regulation of viral life cycle	GO	2 out of 6	4.79056	downregulated	6	2.05323	0.1283	upregulated	11	8.79286	0.0002	downregulated	5	1.18592	0.3055	downregulated	1	0.731881	0.481	upregulated	7	2.21453	0.1092	downregulated	3	2.18325	0.1127
regulation of neuromuscular junction development	GO	2 out of 6	4.78176					upregulated	1	2.42014	0.0889													downregulated	1	2.36162	0.0943
nucleotide-activated protein kinase complex	GO	4 out of 6	4.77963	upregulated	1	1.48101	0.2274	upregulated	1	0.799311	0.4496	downregulated	1	0.459953	0.6313					downregulated	1	1.10466	0.3313	downregulated	1	1.85461	0.1565
positive regulation of cold-induced thermogenesis	GO	3 out of 6	4.77862	downregulated	1	2.28362	0.1019	upregulated	5	3.32606	0.0359	upregulated	5	3.22706	0.0397	downregulated	2	1.68723	0.185	upregulated	3	1.24318	0.2885	downregulated	3	2.19635	0.1112
serine/threonine protein kinase complex	GO	3 out of 6	4.76444	upregulated	6	2.08075	0.1248	upregulated	4	5.40323	0.0045	upregulated	3	1.2238	0.2941	downregulated	5	1.549	0.2125	upregulated	9	2.31878	0.0984	upregulated	1	0.0755618	0.9272
regulation of oogenesis	GO	3 out of 6	4.7614									downregulated	3	3.4773	0.0309	upregulated	1	2.40584	0.0902	downregulated	1	1.42865	0.2396	downregulated	2	4.40421	0.0122
sperm head	GO	2 out of 6	4.76022									upregulated	1	1.74857	0.174					downregulated	1	3.01165	0.0492
acid-amino acid ligase activity	GO	3 out of 6	4.7601	downregulated	1	1.02771	0.3578	upregulated	1	1.95031	0.1422	upregulated	2	2.43532	0.0876					downregulated	1	1.40218	0.2461
SNARE complex	GO	3 out of 6	4.74418	upregulated	3	3.51828	0.0297	upregulated	4	3.12167	0.0441	downregulated	3	0.415372	0.6601	downregulated	2	1.10444	0.3314	downregulated	1	0.393489	0.6747	upregulated	2	0.769441	0.4633
dendritic shaft	GO	4 out of 6	4.73558	upregulated	3	2.99858	0.0499	downregulated	2	2.2165	0.109	downregulated	3	4.87692	0.0076	upregulated	1	1.98116	0.1379	downregulated	1	0.750412	0.4722	downregulated	3	6.09884	0.0022
regulation of dendritic spine maintenance	GO	3 out of 6	4.7151					downregulated	1	1.94951	0.1423	upregulated	1	2.79778	0.0609	upregulated	1	2.91344	0.0543	downregulated	1	2.66091	0.0699	upregulated	1	1.70752	0.1813
synapsis	GO	3 out of 6	4.67282	downregulated	1	0.604394	0.5464	upregulated	4	3.76881	0.0231	upregulated	1	1.45034	0.2345	downregulated	1	0.318186	0.7275	upregulated	3	1.61877	0.1981	downregulated	1	1.99503	0.136
monosaccharide metabolic process	GO	2 out of 6	4.66623	downregulated	3	4.18084	0.0153	downregulated	4	1.78062	0.1685	downregulated	4	1.08204	0.3389	downregulated	6	1.17069	0.3102	downregulated	6	3.67353	0.0254	downregulated	3	0.992703	0.3706
regulation of RNA polymerase II regulatory region sequence-specific DNA binding	GO	2 out of 6	4.64713					upregulated	1	4.36756	0.0127					downregulated	1	1.3975	0.2472	downregulated	1	1.67707	0.1869
pyridoxal phosphate binding	GO	4 out of 6	4.64133	upregulated	2	1.82344	0.1615	upregulated	2	2.36621	0.0938	upregulated	5	4.83151	0.008	upregulated	2	3.09774	0.0452	upregulated	5	3.3178	0.0362	upregulated	3	4.15978	0.0156
establishment of protein localization to organelle	GO	4 out of 6	4.63287	upregulated	21	0.726675	0.4835	upregulated	16	2.02639	0.1318	upregulated	12	2.3292	0.0974	downregulated	17	2.79881	0.0609	downregulated	19	5.60859	0.0037	upregulated	19	3.25918	0.0384
Golgi cisterna	GO	4 out of 6	4.63104	upregulated	2	0.620893	0.5375	upregulated	4	1.69337	0.1839	upregulated	3	2.0702	0.1262	downregulated	5	1.77147	0.1701	downregulated	7	3.62663	0.0266	upregulated	5	1.60859	0.2002
metallopeptidase activity	GO	4 out of 6	4.61867	upregulated	6	0.721221	0.4862	downregulated	3	0.729429	0.4822	upregulated	7	4.3525	0.0129	downregulated	9	2.99473	0.05	downregulated	2	1.57128	0.2078	downregulated	4	1.69783	0.1831
regulation of anoikis	GO	3 out of 6	4.59787	upregulated	2	3.19872	0.0408	upregulated	3	5.34922	0.0048	upregulated	2	1.60508	0.2009	downregulated	1	0.406437	0.666	upregulated	4	2.88625	0.0558	upregulated	2	2.26247	0.1041
dendrite extension	GO	2 out of 6	4.59157					upregulated	1	1.47968	0.2277	upregulated	1	2.01647	0.1331	upregulated	1	3.11189	0.0445
sperm midpiece	GO	3 out of 6	4.58156	upregulated	1	2.496	0.0824	upregulated	1	1.2697	0.2809	upregulated	1	1.37649	0.2525					upregulated	1	0.560624	0.5709
peroxisome	GO	2 out of 6	4.56023	upregulated	9	3.08068	0.0459	upregulated	8	3.2511	0.0387	upregulated	10	5.9138	0.0027	downregulated	3	0.7916	0.4531	downregulated	6	2.36788	0.0937	downregulated	4	2.19235	0.1117
protein localization to non-motile cilium	GO	3 out of 6	4.53124	upregulated	1	1.72586	0.178	upregulated	1	1.34072	0.2617	upregulated	1	1.46466	0.2312
phosphatase inhibitor activity	GO	3 out of 6	4.51407	upregulated	3	3.27475	0.0378	upregulated	2	3.02942	0.0483	upregulated	1	1.66864	0.1885					upregulated	4	2.84503	0.0581	upregulated	1	0.613701	0.5413
positive regulation of cell cycle G2/M phase transition	GO	4 out of 6	4.50586	upregulated	2	1.24734	0.2873	upregulated	2	1.31424	0.2687	downregulated	3	1.42368	0.2408					downregulated	2	1.67349	0.1876	downregulated	1	1.69446	0.1837
cellular response to potassium ion	GO	2 out of 6	4.49995																	downregulated	1	2.30488	0.0998	downregulated	1	2.19507	0.1114
establishment of protein localization to endoplasmic reticulum	GO	5 out of 6	4.47808	upregulated	3	0.0736638	0.929	downregulated	1	2.36038	0.0944	upregulated	2	0.200435	0.8184	upregulated	1	1.15826	0.314	downregulated	7	3.58052	0.0279	downregulated	3	1.82558	0.1611
response to peptide hormone	GO	3 out of 6	4.45868	downregulated	9	3.39896	0.0334	upregulated	14	7.93469	0.0004	downregulated	22	2.82545	0.0593	downregulated	15	3.4861	0.0306	downregulated	11	3.50914	0.0299	downregulated	10	2.72535	0.0655
negative regulation of long-term synaptic potentiation	GO	2 out of 6	4.42638	upregulated	1	0.841194	0.4312	upregulated	2	4.41087	0.0121	downregulated	1	0.825688	0.4379					upregulated	2	3.85407	0.0212	upregulated	1	2.53188	0.0795
presynapse assembly	GO	3 out of 6	4.42171	upregulated	2	2.87671	0.0563	upregulated	1	1.22969	0.2924	upregulated	2	3.7524	0.0235	upregulated	1	3.47291	0.031	upregulated	2	1.47831	0.228	upregulated	1	1.67929	0.1865
regulation of RNA polymerase II transcriptional preinitiation complex assembly	GO	3 out of 6	4.41364	upregulated	3	2.37031	0.0935	upregulated	1	1.73587	0.1762	downregulated	1	0.337971	0.7132					downregulated	1	0.645434	0.5244
regulation of synaptic vesicle recycling	GO	2 out of 6	4.41198	upregulated	3	5.53745	0.0039					upregulated	1	2.49179	0.0828	downregulated	2	2.34029	0.0963	upregulated	1	1.27697	0.2789
positive regulation of peptidyl-lysine acetylation	GO	4 out of 6	4.4066	upregulated	2	0.862335	0.4222	upregulated	1	2.10401	0.122	upregulated	1	0.646998	0.5236					upregulated	4	1.65969	0.1902	downregulated	2	2.45295	0.086
actin filament bundle	GO	4 out of 6	4.40227	upregulated	3	0.809917	0.4449	upregulated	6	5.9551	0.0026	upregulated	3	3.47305	0.031	upregulated	1	2.71399	0.0663	upregulated	8	4.43982	0.0118	upregulated	4	4.10997	0.0164
cellular response to hepatocyte growth factor stimulus	GO	3 out of 6	4.38851	downregulated	1	2.47996	0.0837	upregulated	1	2.28457	0.1018	upregulated	1	2.40205	0.0905					downregulated	1	2.18185	0.1128
L-alpha-amino acid transmembrane transport	GO	3 out of 6	4.36867	upregulated	2	2.31507	0.0988	upregulated	2	3.82459	0.0218	upregulated	3	6.23501	0.002	downregulated	4	2.90011	0.055	upregulated	3	2.59412	0.0747	upregulated	3	2.51176	0.0811
ligase activity	GO	3 out of 6	4.36792	downregulated	5	1.87567	0.1533	upregulated	8	2.81901	0.0597	upregulated	9	5.09494	0.0061	downregulated	4	1.65159	0.1917	downregulated	5	2.32469	0.0978	upregulated	7	2.34346	0.096
integral component of postsynaptic membrane	GO	2 out of 6	4.34402	upregulated	1	1.62853	0.1962					upregulated	1	3.61362	0.027					upregulated	1	0.898128	0.4073
presynaptic membrane assembly	GO	2 out of 6	4.34159	upregulated	1	1.34549	0.2604					upregulated	2	4.36282	0.0127	upregulated	1	3.79028	0.0226	upregulated	1	0.794185	0.4519
positive regulation of telomere capping	GO	3 out of 6	4.31951	upregulated	2	3.25254	0.0387	upregulated	1	1.5617	0.2098	downregulated	1	1.76773	0.1707					downregulated	1	1.273	0.28
ubiquitin-like protein ligase binding	GO	4 out of 6	4.29401	upregulated	19	1.379	0.2518	upregulated	17	2.43887	0.0873	downregulated	21	3.34587	0.0352	downregulated	15	2.47008	0.0846	downregulated	14	3.56549	0.0283	downregulated	8	2.7266	0.0654
porphyrin-containing compound metabolic process	GO	4 out of 6	4.28732	upregulated	1	1.00178	0.3672	upregulated	3	3.00814	0.0494	downregulated	3	2.4083	0.09	upregulated	1	1.93816	0.144	upregulated	2	1.67294	0.1877	downregulated	2	2.42047	0.0889
Gemini of coiled bodies	GO	2 out of 6	4.27858	upregulated	2	2.32916	0.0974	upregulated	2	3.05651	0.0471									upregulated	1	1.10709	0.3305
macrophage migration	GO	1 out of 6	4.26444					upregulated	3	9.05601	0.0001					downregulated	1	2.02081	0.1325	upregulated	1	1.06882	0.3434	upregulated	1	1.70195	0.1823
regulation of neural precursor cell proliferation	GO	3 out of 6	4.23147	upregulated	2	2.56532	0.0769	upregulated	4	4.19528	0.0151	downregulated	4	3.48498	0.0307	downregulated	2	1.38543	0.2502	downregulated	1	2.99748	0.0499	upregulated	6	4.14119	0.0159
oxidoreductase activity, acting on the CH-NH2 group of donors	GO	2 out of 6	4.23046					upregulated	2	3.58696	0.0277	upregulated	3	5.71697	0.0033					upregulated	2	2.31887	0.0984	upregulated	1	2.75459	0.0636
regulation of protein targeting	GO	3 out of 6	4.22055	upregulated	7	4.22215	0.0147	downregulated	2	2.04984	0.1288	downregulated	5	2.16401	0.1149	downregulated	4	3.13056	0.0437	downregulated	8	5.49411	0.0041	downregulated	3	1.84869	0.1574
regulation of cellular protein catabolic process	GO	3 out of 6	4.20614	upregulated	19	2.92928	0.0534	upregulated	14	3.50156	0.0302	downregulated	16	2.82354	0.0594	downregulated	12	1.23931	0.2896	downregulated	11	2.25269	0.1051	upregulated	6	0.414536	0.6606
negative regulation of calcineurin-mediated signaling	GO	2 out of 6	4.19197									upregulated	1	1.65408	0.1913					downregulated	1	2.53788	0.079
cell-cell adhesion mediated by cadherin	GO	2 out of 6	4.18995	upregulated	2	3.35486	0.0349					upregulated	1	4.82471	0.008					upregulated	2	3.3505	0.0351	upregulated	1	0.639126	0.5278
endoplasmic reticulum unfolded protein response	GO	4 out of 6	4.1832	downregulated	2	3.25963	0.0384	upregulated	5	1.19545	0.3026	upregulated	5	2.20809	0.1099	downregulated	3	0.706283	0.4935	downregulated	5	2.35075	0.0953	downregulated	4	2.39483	0.0912
ganglion development	GO	1 out of 6	4.16833	upregulated	2	5.87019	0.0028													upregulated	1	0.479723	0.619	upregulated	1	1.22214	0.2946
regulation of heart rate by cardiac conduction	GO	3 out of 6	4.15118	upregulated	3	4.18128	0.0153	upregulated	3	3.54432	0.0289	upregulated	2	1.34349	0.2609	downregulated	1	1.64128	0.1937	upregulated	4	3.27663	0.0378	downregulated	1	2.09703	0.1228
ciliary plasm	GO	3 out of 6	4.13348	upregulated	8	2.95357	0.0522	downregulated	1	0.102603	0.9025	downregulated	1	1.47992	0.2277	upregulated	2	1.57705	0.2066	downregulated	2	1.26902	0.2811	upregulated	1	0.0836473	0.9198
negative regulation of response to endoplasmic reticulum stress	GO	3 out of 6	4.11898	upregulated	4	2.97988	0.0508	downregulated	2	1.63218	0.1955	upregulated	2	1.56112	0.2099	downregulated	1	0.274903	0.7596	downregulated	2	2.11523	0.1206	upregulated	1	0.630172	0.5325
isomerase activity	GO	3 out of 6	4.11145	downregulated	2	2.23283	0.1072	upregulated	5	2.44386	0.0868	downregulated	6	1.69035	0.1845	downregulated	6	2.44307	0.0869	downregulated	6	3.09518	0.0453	downregulated	3	3.24831	0.0388
protein membrane anchor	GO	3 out of 6	4.09662					upregulated	1	2.04582	0.1293	downregulated	1	1.63445	0.1951	downregulated	1	1.10736	0.3304	downregulated	1	1.39647	0.2475	downregulated	1	3.39614	0.0335
regulation of response to endoplasmic reticulum stress	GO	4 out of 6	4.08894	upregulated	6	1.97655	0.1385	upregulated	4	1.80422	0.1646	downregulated	5	1.76847	0.1706	downregulated	3	0.640742	0.5269	downregulated	4	2.00671	0.1344	downregulated	1	0.710662	0.4913
regulation of behavior	GO	3 out of 6	4.08221	upregulated	6	6.3232	0.0018	upregulated	3	1.5362	0.2152	upregulated	1	1.48385	0.2268	downregulated	2	1.1783	0.3078	upregulated	4	1.7895	0.167	upregulated	3	2.29324	0.1009
aminoacyl-tRNA synthetase multienzyme complex	GO	2 out of 6	4.08024					upregulated	2	3.48906	0.0305	downregulated	1	0.65912	0.5173					downregulated	1	1.25029	0.2864
positive regulation of T-helper 17 type immune response	GO	2 out of 6	4.07735																	downregulated	1	1.51717	0.2193	downregulated	1	2.56018	0.0773
Golgi-associated vesicle	GO	1 out of 6	4.07153	upregulated	9	4.8122	0.0081	downregulated	3	0.926358	0.396	downregulated	20	12.3701	4.2e-06	downregulated	15	16.3625	7.8e-08	downregulated	11	5.78964	0.0031	upregulated	8	1.7181	0.1794
calcium-dependent phospholipid binding	GO	2 out of 6	4.06489	downregulated	1	0.537544	0.5842					upregulated	1	0.437089	0.6459	downregulated	2	0.765376	0.4652	downregulated	2	2.86889	0.0568	downregulated	1	1.19599	0.3024
regulation of viral process	GO	2 out of 6	4.06376	downregulated	6	1.26007	0.2836	upregulated	12	7.21233	0.0007	downregulated	8	0.962356	0.382	downregulated	3	0.554903	0.5741	upregulated	9	1.93442	0.1445	downregulated	3	1.56318	0.2095
ER to Golgi vesicle-mediated transport	GO	3 out of 6	4.01722	downregulated	5	1.88174	0.1523	upregulated	10	1.57209	0.2076	downregulated	14	1.59868	0.2022	upregulated	1	1.17355	0.3093	downregulated	12	5.96866	0.0026	upregulated	7	1.21666	0.2962
ovulation	GO	2 out of 6	3.9852									upregulated	1	2.71818	0.066					upregulated	2	3.65684	0.0258	downregulated	1	4.92385	0.0073
cellular oxidant detoxification	GO	3 out of 6	3.97107	downregulated	2	1.12673	0.3241	upregulated	5	3.02268	0.0487	downregulated	5	6.49069	0.0015	downregulated	3	3.4911	0.0305	downregulated	6	4.18834	0.0152	downregulated	3	7.86857	0.0004
cellular response to drug	GO	4 out of 6	3.97102	downregulated	9	6.14537	0.0021	upregulated	15	6.29059	0.0019	upregulated	13	4.71689	0.0089	downregulated	21	5.69058	0.0034	downregulated	11	2.22408	0.1082	downregulated	9	2.57541	0.0761
positive regulation of viral process	GO	4 out of 6	3.9651	upregulated	3	0.241044	0.7858	upregulated	6	3.44307	0.032	downregulated	6	2.10204	0.1222	downregulated	3	0.991549	0.371	downregulated	4	1.36119	0.2564	downregulated	2	2.01339	0.1335
negative regulation of intrinsic apoptotic signaling pathway	GO	4 out of 6	3.96461	upregulated	7	1.72769	0.1777	upregulated	3	2.26859	0.1035	downregulated	3	2.01004	0.134	downregulated	6	5.55255	0.0039	downregulated	5	3.59469	0.0275	downregulated	3	3.93623	0.0195
positive regulation of cellular response to insulin stimulus	GO	3 out of 6	3.9645	upregulated	4	5.17716	0.0056	downregulated	1	0.758518	0.4684	upregulated	1	0.511846	0.5994					upregulated	2	2.09527	0.123	downregulated	1	1.12928	0.3233
negative regulation of chromosome organization	GO	3 out of 6	3.95914	upregulated	11	5.07564	0.0062	upregulated	6	2.63209	0.0719	downregulated	8	1.15026	0.3166	downregulated	7	2.52493	0.0801	upregulated	10	1.52016	0.2187	downregulated	3	1.44676	0.2353
ovulation cycle process	GO	3 out of 6	3.95787	upregulated	2	1.99747	0.1357					upregulated	1	1.75153	0.1735	downregulated	1	0.663934	0.5148	upregulated	5	3.90899	0.0201	downregulated	1	0.872806	0.4178
regulation of trophoblast cell migration	GO	2 out of 6	3.90863	upregulated	1	2.28655	0.1016					downregulated	1	1.54613	0.2131					downregulated	1	3.1682	0.0421
regulation of protein localization to nucleus	GO	2 out of 6	3.90725	downregulated	4	1.66018	0.1901	downregulated	1	3.57653	0.028	downregulated	6	1.13581	0.3212	downregulated	5	1.21787	0.2959	downregulated	11	8.48582	0.0002	downregulated	3	3.01182	0.0492
regulation of viral release from host cell	GO	3 out of 6	3.88826	upregulated	2	0.902306	0.4056	upregulated	4	4.9931	0.0068	upregulated	1	0.684074	0.5046					upregulated	3	2.69122	0.0678	upregulated	2	2.15223	0.1162
regulation of sodium ion transmembrane transporter activity	GO	3 out of 6	3.87876	upregulated	5	4.51295	0.011	downregulated	2	2.07439	0.1256	upregulated	1	1.4974	0.2237	downregulated	1	0.2751	0.7595	downregulated	1	0.646354	0.524	upregulated	1	0.428462	0.6515
lipoprotein particle	GO	2 out of 6	3.87313					upregulated	2	1.307	0.2706	downregulated	1	0.139817	0.8695	downregulated	1	3.01773	0.0489	downregulated	2	5.72367	0.0033
positive regulation of DNA-templated transcription, initiation	GO	4 out of 6	3.86986	upregulated	3	3.57605	0.028	upregulated	1	1.19592	0.3024	downregulated	2	0.718395	0.4875	downregulated	2	2.09642	0.1229	downregulated	1	0.441916	0.6428	downregulated	1	1.47078	0.2297
diacylglycerol binding	GO	1 out of 6	3.86075	upregulated	2	5.5267	0.004					downregulated	1	1.66595	0.189
regulation of cell proliferation involved in heart morphogenesis	GO	2 out of 6	3.85907	downregulated	1	1.03469	0.3553	upregulated	1	1.34779	0.2598	upregulated	3	5.01923	0.0066	downregulated	1	1.47326	0.2292
voltage-gated calcium channel complex	GO	2 out of 6	3.80121	upregulated	5	6.9232	0.001	downregulated	2	1.80085	0.1652	upregulated	4	3.8364	0.0216					downregulated	2	1.56614	0.2088	downregulated	1	2.23507	0.107
muscle cell fate commitment	GO	1 out of 6	3.79823	upregulated	1	4.45979	0.0116					downregulated	1	0.661563	0.516
ubiquitin-protein transferase activity	GO	2 out of 6	3.78636	upregulated	46	18.4631	9.6e-09	upregulated	29	7.77947	0.0004	downregulated	27	1.6517	0.1917	downregulated	16	1.03021	0.3569	downregulated	7	1.28925	0.2755	downregulated	6	2.49711	0.0823
aging	GO	3 out of 6	3.78617	downregulated	5	3.74693	0.0236	upregulated	15	7.26999	0.0007	downregulated	22	6.65235	0.0013	downregulated	14	5.73301	0.0032	downregulated	12	3.8103	0.0221	downregulated	5	2.18582	0.1124
regulation of phosphorylation of RNA polymerase II C-terminal domain	GO	1 out of 6	3.77082																	downregulated	1	3.77082	0.023
response to alkaloid	GO	3 out of 6	3.76513	upregulated	5	3.07425	0.0462	downregulated	1	2.43774	0.0874	upregulated	4	2.91511	0.0542	downregulated	2	0.231184	0.7936	downregulated	2	1.92147	0.1464	upregulated	5	1.47678	0.2284
regulation of early endosome to late endosome transport	GO	3 out of 6	3.75618	upregulated	2	2.55361	0.0778	upregulated	1	0.904334	0.4048	downregulated	1	0.594758	0.5517	downregulated	1	0.535548	0.5853	downregulated	3	3.46606	0.0312	upregulated	1	2.03753	0.1304
regulation of vascular permeability	GO	4 out of 6	3.72761	upregulated	1	3.28643	0.0374	upregulated	1	0.546181	0.5792	upregulated	4	6.22483	0.002	upregulated	1	2.00878	0.1342	upregulated	3	5.60111	0.0037	upregulated	1	2.7375	0.0647
chromosome segregation	GO	2 out of 6	3.72313	upregulated	14	1.6821	0.186	upregulated	19	7.64645	0.0005	downregulated	19	1.79309	0.1664	downregulated	9	0.841171	0.4312	upregulated	19	2.97117	0.0512	downregulated	5	3.4648	0.0313
polysaccharide binding	GO	2 out of 6	3.70115					upregulated	1	1.22969	0.2924	upregulated	2	3.34443	0.0353									downregulated	1	2.47147	0.0845
apicolateral plasma membrane	GO	3 out of 6	3.68871					upregulated	1	1.61407	0.1991	upregulated	1	1.12946	0.3232					downregulated	1	0.945171	0.3886
regulation of organelle assembly	GO	3 out of 6	3.67879	upregulated	17	6.22672	0.002	upregulated	10	2.36056	0.0944	downregulated	18	1.59013	0.2039	downregulated	11	2.20881	0.1098	upregulated	16	2.64367	0.0711	downregulated	4	1.53412	0.2156
negative regulation of cold-induced thermogenesis	GO	2 out of 6	3.6455	downregulated	1	0.38156	0.6828	upregulated	4	6.27577	0.0019	upregulated	2	3.50401	0.0301	downregulated	3	2.60844	0.0736	upregulated	6	2.7253	0.0655	upregulated	1	0.418993	0.6577
small nucleolar ribonucleoprotein complex	GO	1 out of 6	3.64274	upregulated	2	2.47179	0.0844	upregulated	1	0.955886	0.3845	upregulated	1	1.35157	0.2588					downregulated	2	3.64274	0.0262
cyclin binding	GO	4 out of 6	3.62975	upregulated	2	1.38623	0.25	downregulated	2	2.4621	0.0853	upregulated	2	1.16517	0.3119	upregulated	1	1.81494	0.1628	upregulated	2	1.01992	0.3606	downregulated	1	2.74542	0.0642
regulation of hydrogen peroxide-induced cell death	GO	3 out of 6	3.60631	downregulated	2	2.05066	0.1287	upregulated	2	4.6313	0.0097	downregulated	4	4.23203	0.0145	downregulated	1	2.15803	0.1156	downregulated	3	4.28416	0.0138	downregulated	1	3.13156	0.0436
response to potassium ion	GO	2 out of 6	3.59731																	downregulated	1	1.79866	0.1655	downregulated	1	1.79866	0.1655
regulation of protein localization to membrane	GO	4 out of 6	3.53353	upregulated	10	2.18144	0.1129	downregulated	5	1.50327	0.2224	upregulated	7	3.01459	0.0491	downregulated	7	2.66584	0.0695	downregulated	5	1.75343	0.1732	downregulated	2	0.753188	0.4709
positive regulation of transcription from RNA polymerase II promoter in response to endoplasmic reticulum stress	GO	2 out of 6	3.48939					upregulated	1	1.88837	0.1513	upregulated	1	2.83852	0.0585	downregulated	1	1.2375	0.2901
nuclear import signal receptor activity	GO	2 out of 6	3.48663	upregulated	1	0.935715	0.3923									upregulated	1	2.55092	0.078
regulation of cardiac muscle cell differentiation	GO	3 out of 6	3.48393	upregulated	3	4.72004	0.0089					downregulated	3	3.79086	0.0226	downregulated	2	2.17202	0.1139	downregulated	3	2.37854	0.0927	downregulated	2	2.34823	0.0955
outer dynein arm assembly	GO	3 out of 6	3.45138					upregulated	1	1.69763	0.1831	upregulated	1	2.44748	0.0865	upregulated	1	3.64268	0.0262	upregulated	1	2.21835	0.1088	upregulated	1	2.11807	0.1203
one-carbon metabolic process	GO	2 out of 6	3.44066					upregulated	2	5.52658	0.004	downregulated	3	1.17936	0.3075	downregulated	1	0.590842	0.5539	upregulated	3	2.73227	0.0651	downregulated	1	2.41655	0.0892
regulation of glucose import in response to insulin stimulus	GO	2 out of 6	3.4251	upregulated	4	6.27718	0.0019	downregulated	1	0.948803	0.3872	upregulated	1	0.677477	0.5079					upregulated	2	2.58075	0.0757
establishment of chromosome localization	GO	3 out of 6	3.41601	upregulated	5	2.293	0.101	upregulated	6	3.53638	0.0291	downregulated	3	1.27852	0.2784	downregulated	2	1.23617	0.2905	downregulated	1	0.248411	0.78	upregulated	1	0.147095	0.8632
pyrimidine-containing compound transmembrane transport	GO	1 out of 6	3.39226																	downregulated	1	3.39226	0.0336
transferase activity, transferring sulfur-containing groups	GO	3 out of 6	3.38865	upregulated	2	1.82315	0.1615					upregulated	3	4.96863	0.007	downregulated	2	2.45629	0.0858	downregulated	3	1.59677	0.2025	upregulated	4	2.54361	0.0786
positive regulation of protein polyubiquitination	GO	3 out of 6	3.38679	upregulated	1	0.687945	0.5026	upregulated	2	2.73629	0.0648	upregulated	1	1.09637	0.3341	downregulated	1	1.13382	0.3218
regulation of telomere maintenance via telomere lengthening	GO	3 out of 6	3.38584	upregulated	5	3.01877	0.0489	downregulated	1	3.15746	0.0425	downregulated	4	2.33061	0.0972	downregulated	4	3.43741	0.0321	downregulated	7	7.45849	0.0006	downregulated	2	1.83406	0.1598
regulation of extrinsic apoptotic signaling pathway via death domain receptors	GO	3 out of 6	3.37884	upregulated	1	0.0162081	0.9839	upregulated	2	4.90364	0.0074	downregulated	4	1.18886	0.3046	upregulated	1	1.98648	0.1372	upregulated	4	1.59919	0.2021	upregulated	3	0.739445	0.4774
regulation of sodium ion transmembrane transport	GO	3 out of 6	3.37322	upregulated	5	3.9374	0.0195	downregulated	2	1.8797	0.1526	upregulated	1	1.31562	0.2683	downregulated	1	0.189217	0.8276	downregulated	1	0.491423	0.6118	upregulated	1	0.302291	0.7391
protein deacetylase activity	GO	4 out of 6	3.3606	upregulated	3	2.37522	0.093	upregulated	2	1.68019	0.1863	downregulated	3	0.37496	0.6873	upregulated	1	1.78614	0.1676	upregulated	7	5.22253	0.0054	downregulated	1	3.11653	0.0443
negative regulation of telomere maintenance via telomere lengthening	GO	3 out of 6	3.35371	upregulated	3	2.52944	0.0797	upregulated	1	1.97137	0.1393	downregulated	2	1.22908	0.2926	downregulated	1	1.07894	0.34	upregulated	2	2.1313	0.1187	downregulated	2	3.29224	0.0372
carbohydrate transmembrane transporter activity	GO	3 out of 6	3.35337	upregulated	2	2.24609	0.1058					downregulated	2	3.678	0.0253	downregulated	3	6.4566	0.0016	downregulated	3	7.30021	0.0007	downregulated	2	3.94167	0.0194
vacuolar proton-transporting V-type ATPase complex	GO	2 out of 6	3.35051													downregulated	1	0.980334	0.3752	downregulated	1	1.77595	0.1693	downregulated	1	2.55489	0.0777
cellular response to peptide	GO	3 out of 6	3.32396	downregulated	7	3.53761	0.0291	upregulated	12	6.92718	0.001	downregulated	20	4.12628	0.0161	downregulated	16	3.56048	0.0284	downregulated	11	4.48591	0.0113	downregulated	10	3.13523	0.0435
positive regulation of glycoprotein metabolic process	GO	4 out of 6	3.27964	upregulated	1	0.743321	0.4755	upregulated	1	0.67255	0.5104					upregulated	1	1.57847	0.2063	downregulated	1	1.12603	0.3243	upregulated	1	0.840726	0.4314
antioxidant activity	GO	3 out of 6	3.27575	downregulated	2	1.29228	0.2746	upregulated	4	2.29157	0.1011	downregulated	5	6.81861	0.0011	downregulated	3	3.60336	0.0272	downregulated	6	4.62511	0.0098	downregulated	3	8.07331	0.0003
negative regulation of receptor binding	GO	2 out of 6	3.27131									upregulated	1	1.01294	0.3631	upregulated	1	3.25039	0.0388	upregulated	2	0.992023	0.3708
synaptic vesicle cycle	GO	4 out of 6	3.2708	upregulated	5	3.45979	0.0314	upregulated	1	0.133963	0.8746	upregulated	5	2.58466	0.0754	downregulated	4	1.33927	0.262	upregulated	5	3.10511	0.0448	downregulated	2	1.53677	0.2151
negative regulation of ubiquitin-dependent protein catabolic process	GO	1 out of 6	3.25222	downregulated	1	2.55542	0.0777					downregulated	4	2.21147	0.1095	upregulated	1	1.98163	0.1378	downregulated	5	4.13575	0.016	upregulated	2	0.883528	0.4133
co-receptor binding	GO	1 out of 6	3.25039									downregulated	1	1.08404	0.3382	upregulated	1	3.25039	0.0388
meiotic chromosome segregation	GO	4 out of 6	3.24463	upregulated	3	0.532562	0.5871	upregulated	8	6.35258	0.0017	upregulated	2	1.39589	0.2476	upregulated	1	0.773667	0.4613	upregulated	6	2.85712	0.0574	upregulated	5	2.95295	0.0522
UDP-glycosyltransferase activity	GO	3 out of 6	3.23895	upregulated	2	1.68795	0.1849	upregulated	6	2.8271	0.0592	upregulated	6	4.78976	0.0083	downregulated	7	1.86025	0.1556	upregulated	5	2.16866	0.1143	upregulated	4	2.03695	0.1304
ligase activity, forming carbon-nitrogen bonds	GO	3 out of 6	3.17575	downregulated	1	0.398659	0.6712	upregulated	4	2.98091	0.0507	upregulated	3	2.77131	0.0626	downregulated	2	2.62612	0.0724	downregulated	2	1.88357	0.152	upregulated	2	1.43526	0.2381
spanning component of membrane	GO	2 out of 6	3.17204	upregulated	1	1.31652	0.2681	downregulated	1	1.794	0.1663	upregulated	2	4.29771	0.0136					upregulated	1	0.64819	0.523
folic acid binding	GO	1 out of 6	3.16972	downregulated	1	1.24593	0.2877	upregulated	2	7.47718	0.0006	downregulated	2	1.37255	0.2535					downregulated	1	1.32925	0.2647	downregulated	1	3.16972	0.042
transcription corepressor binding	GO	2 out of 6	3.12632	upregulated	1	0.967542	0.38	upregulated	3	3.19309	0.041	downregulated	1	0.276478	0.7585	downregulated	1	0.757831	0.4687
regulation of DNA-templated transcription, initiation	GO	3 out of 6	3.11706	upregulated	6	5.39852	0.0045	upregulated	1	0.93469	0.3927	downregulated	3	0.762778	0.4664	downregulated	3	2.48889	0.083	upregulated	3	1.15449	0.3152	downregulated	1	1.19001	0.3042
negative regulation of hydrogen peroxide-induced cell death	GO	3 out of 6	3.11592	upregulated	2	1.90144	0.1494	upregulated	2	5.27725	0.0051	downregulated	3	4.87157	0.0077	downregulated	1	2.62727	0.0723	upregulated	1	3.39234	0.0336	downregulated	1	3.43607	0.0322
negative regulation of extrinsic apoptotic signaling pathway in absence of ligand	GO	3 out of 6	3.11387	upregulated	1	1.76889	0.1705	upregulated	2	5.83642	0.0029	downregulated	3	2.61815	0.0729	downregulated	3	2.22184	0.1084	downregulated	1	0.348553	0.7057
activation of cysteine-type endopeptidase activity	GO	2 out of 6	3.09635	downregulated	1	1.53441	0.2156					upregulated	2	3.08419	0.0458	downregulated	1	0.837662	0.4327	downregulated	1	2.38423	0.0922
response to dopamine	GO	3 out of 6	3.09196	upregulated	1	1.82578	0.1611	upregulated	1	4.00095	0.0183	downregulated	2	2.25905	0.1044	downregulated	1	1.26347	0.2827	downregulated	1	2.01378	0.1335	upregulated	1	1.22603	0.2935
cellular response to dopamine	GO	3 out of 6	3.09196	upregulated	1	1.82578	0.1611	upregulated	1	4.00095	0.0183	downregulated	2	2.25905	0.1044	downregulated	1	1.26347	0.2827	downregulated	1	2.01378	0.1335	upregulated	1	1.22603	0.2935
blood coagulation, fibrin clot formation	GO	2 out of 6	3.08494					downregulated	1	1.57263	0.2075	upregulated	1	2.54621	0.0784					downregulated	1	2.11136	0.1211
RNA phosphodiester bond hydrolysis, endonucleolytic	GO	3 out of 6	3.07838	upregulated	3	1.36276	0.256	upregulated	8	12.3579	4.3e-06	downregulated	6	5.22201	0.0054	downregulated	4	5.59698	0.0037	downregulated	1	0.710063	0.4916	upregulated	2	0.533321	0.5867
glycolytic process through glucose-6-phosphate	GO	2 out of 6	3.03841					downregulated	1	2.10047	0.1224					downregulated	1	0.940833	0.3903	downregulated	2	5.13418	0.0059	downregulated	1	0.945535	0.3885
glycolytic process through fructose-6-phosphate	GO	2 out of 6	3.03841					downregulated	1	2.10047	0.1224					downregulated	1	0.940833	0.3903	downregulated	2	5.13418	0.0059	downregulated	1	0.945535	0.3885
cardiac muscle contraction	GO	4 out of 6	3.01815	upregulated	5	5.68136	0.0034	downregulated	4	6.13054	0.0022	upregulated	4	1.77354	0.1697	upregulated	2	3.26048	0.0384	downregulated	4	2.31443	0.0988	upregulated	3	3.88111	0.0206
positive regulation of ruffle assembly	GO	2 out of 6	3.00735	upregulated	1	1.26181	0.2831	upregulated	1	6.91158	0.001	downregulated	2	1.61918	0.1981	downregulated	1	2.4485	0.0864					upregulated	1	1.09837	0.3334
regulation of AMPA receptor activity	GO	3 out of 6	2.99987	upregulated	2	3.88435	0.0206	downregulated	2	3.22913	0.0396	upregulated	1	1.16088	0.3132					downregulated	1	2.86889	0.0568	upregulated	1	1.68513	0.1854
phosphatidylglycerol binding	GO	2 out of 6	2.98646	upregulated	1	1.33048	0.2644													downregulated	1	1.65598	0.1909
phosphatidylcholine acyl-chain remodeling	GO	2 out of 6	2.97777					downregulated	1	1.05205	0.3492	downregulated	1	1.13054	0.3229	downregulated	1	0.721344	0.4861	downregulated	1	1.66866	0.1885	downregulated	1	3.16099	0.0424
cell cycle G2/M phase transition	GO	3 out of 6	2.96837	upregulated	11	4.28665	0.0138	upregulated	10	7.30599	0.0007	downregulated	15	4.64393	0.0096	downregulated	8	4.0922	0.0167	downregulated	4	2.002	0.1351	upregulated	6	1.89012	0.1511
negative regulation of transport	GO	3 out of 6	2.95726	upregulated	19	2.11193	0.121	upregulated	15	6.88076	0.001	downregulated	26	3.38901	0.0337	downregulated	20	3.26979	0.038	upregulated	24	2.04237	0.1297	downregulated	8	2.66573	0.0695
regulation of macrophage apoptotic process	GO	1 out of 6	2.93219	upregulated	1	4.79467	0.0083													upregulated	1	1.86248	0.1553
regulation of rRNA processing	GO	2 out of 6	2.92373					upregulated	1	2.05843	0.1277									downregulated	1	2.15257	0.1162	upregulated	1	1.28727	0.276
regulation of relaxation of muscle	GO	2 out of 6	2.83731					upregulated	1	1.93779	0.144	upregulated	1	1.44821	0.235					upregulated	1	0.54869	0.5777
ketone body metabolic process	GO	1 out of 6	2.75209																	downregulated	1	2.75209	0.0638
protein kinase complex	GO	3 out of 6	2.74222	upregulated	8	3.20505	0.0406	upregulated	5	4.7877	0.0083	downregulated	10	2.00647	0.1345	downregulated	6	1.33196	0.264	upregulated	11	2.63435	0.0718	downregulated	2	0.722244	0.4857
cellular response to angiotensin	GO	2 out of 6	2.73795					upregulated	2	3.01281	0.0492	downregulated	2	0.802567	0.4482	downregulated	1	0.937453	0.3916					downregulated	1	1.46516	0.231
regulation of hepatocyte proliferation	GO	1 out of 6	2.72909					upregulated	2	3.98015	0.0187	downregulated	1	1.25105	0.2862
negative regulation of apoptotic signaling pathway	GO	4 out of 6	2.72686	upregulated	12	0.977224	0.3764	upregulated	11	7.74175	0.0004	downregulated	12	4.07319	0.017	downregulated	14	8.4324	0.0002	downregulated	8	2.13918	0.1178	downregulated	4	4.3743	0.0126
structural constituent of epidermis	GO	1 out of 6	2.71447													upregulated	1	2.71447	0.0662
regulation of circadian rhythm	GO	4 out of 6	2.6889	upregulated	8	2.57484	0.0762	upregulated	5	1.56415	0.2093	upregulated	3	1.69891	0.1829	downregulated	5	1.38917	0.2493	downregulated	5	1.09793	0.3336	upregulated	6	2.85775	0.0574
hormone secretion	GO	4 out of 6	2.6787	downregulated	2	1.15756	0.3143	upregulated	1	0.161799	0.8506	upregulated	3	2.3305	0.0972	downregulated	2	1.67073	0.1881	downregulated	3	1.38231	0.251	downregulated	1	1.6324	0.1955
negative regulation of cellular protein catabolic process	GO	2 out of 6	2.6743	downregulated	1	2.03396	0.1308	upregulated	3	0.846149	0.4291	downregulated	5	1.554	0.2114	upregulated	1	1.48365	0.2268	downregulated	5	2.7008	0.0672	upregulated	3	0.872651	0.4178
motile cilium assembly	GO	3 out of 6	2.6731	upregulated	1	0.584454	0.5574					upregulated	1	1.16088	0.3132	upregulated	1	1.93216	0.1448	upregulated	1	1.00439	0.3663
positive regulation of potassium ion transmembrane transporter activity	GO	2 out of 6	2.67145									downregulated	1	0.486597	0.6147	downregulated	1	0.834101	0.4343	downregulated	1	1.02866	0.3575	downregulated	1	2.96349	0.0516
dopamine binding	GO	1 out of 6	2.6608									upregulated	1	2.6608	0.0699
toxin metabolic process	GO	3 out of 6	2.65546	upregulated	2	2.24707	0.1057	upregulated	1	1.07838	0.3401	downregulated	1	0.823507	0.4389					downregulated	1	3.07329	0.0463	upregulated	1	2.91978	0.0539
regulation of T-helper 17 cell differentiation	GO	2 out of 6	2.64761									downregulated	1	0.408434	0.6647					downregulated	1	1.03625	0.3548	downregulated	1	2.01979	0.1327
liver regeneration	GO	2 out of 6	2.63844	downregulated	1	0.496382	0.6087	upregulated	2	5.15002	0.0058	downregulated	5	2.26552	0.1038	upregulated	1	2.21698	0.1089	upregulated	1	0.407636	0.6652	upregulated	1	1.55903	0.2103
potassium channel regulator activity	GO	2 out of 6	2.6267	upregulated	6	7.64588	0.0005	downregulated	2	3.92708	0.0197	upregulated	1	1.96781	0.1398	downregulated	1	0.750077	0.4723	upregulated	1	0.696113	0.4985	upregulated	2	1.61372	0.1991
regulation of transmission of nerve impulse	GO	2 out of 6	2.60232	upregulated	1	4.36763	0.0127					downregulated	1	3.50549	0.03	upregulated	1	2.84587	0.0581	upregulated	1	1.10569	0.331
negative regulation of proteolysis involved in cellular protein catabolic process	GO	2 out of 6	2.60078	downregulated	1	2.20505	0.1102	upregulated	2	0.526919	0.5904	downregulated	4	1.30203	0.272	downregulated	5	1.69849	0.183	downregulated	5	3.16921	0.042	upregulated	3	1.09536	0.3344
phosphatidylserine acyl-chain remodeling	GO	2 out of 6	2.60053					downregulated	1	1.27827	0.2785	downregulated	1	1.36095	0.2564					downregulated	1	1.84741	0.1576	downregulated	1	3.39234	0.0336
negative regulation of blood pressure	GO	3 out of 6	2.59167					upregulated	3	1.77029	0.1703	upregulated	3	2.41051	0.0898	downregulated	4	2.48401	0.0834	upregulated	2	1.05198	0.3492	downregulated	2	1.94685	0.1427
protein serine/threonine phosphatase complex	GO	3 out of 6	2.58457	upregulated	7	4.50414	0.0111	upregulated	5	2.89814	0.0551	upregulated	1	0.277002	0.7581	downregulated	3	1.2217	0.2947	upregulated	6	1.93922	0.1438	upregulated	3	1.9338	0.1446
toxin transport	GO	2 out of 6	2.58397	downregulated	1	1.79923	0.1654	downregulated	1	1.61472	0.1989	upregulated	2	1.56796	0.2085	downregulated	1	0.806216	0.4465	downregulated	6	7.64628	0.0005	upregulated	3	2.4101	0.0898
mitochondrial outer membrane translocase complex	GO	1 out of 6	2.54912	upregulated	1	1.16271	0.3126													downregulated	1	2.54912	0.0782
regulation of T-helper 17 type immune response	GO	2 out of 6	2.5416									downregulated	1	0.371243	0.6899					downregulated	1	0.970437	0.3789	downregulated	1	1.9424	0.1434
regulation of defense response to virus	GO	3 out of 6	2.52404	downregulated	2	1.31053	0.2697	upregulated	7	5.42643	0.0044	downregulated	5	2.05139	0.1286	downregulated	3	1.85354	0.1567	downregulated	2	1.47982	0.2277	downregulated	1	0.833236	0.4346
flagellated sperm motility	GO	4 out of 6	2.49362	upregulated	2	0.412849	0.6618	upregulated	3	1.11687	0.3273	downregulated	1	0.135962	0.8729	downregulated	1	0.204329	0.8152	downregulated	1	0.377743	0.6854	downregulated	1	0.926447	0.396
MHC class I protein complex	GO	2 out of 6	2.47714					upregulated	1	0.710201	0.4915	downregulated	2	1.76627	0.171	upregulated	1	3.53321	0.0292
positive regulation of ubiquitin-dependent protein catabolic process	GO	4 out of 6	2.47129	upregulated	7	2.15602	0.1158	upregulated	5	2.97356	0.0511	downregulated	10	5.23299	0.0053	upregulated	1	1.68774	0.1849	downregulated	5	1.93967	0.1438	upregulated	2	1.0527	0.349
positive regulation of amyloid-beta formation	GO	1 out of 6	2.46377													downregulated	1	1.43853	0.2373	downregulated	2	2.78992	0.0614	downregulated	2	3.9023	0.0202
astrocyte projection	GO	2 out of 6	2.46369									upregulated	1	1.79841	0.1656					upregulated	2	1.76869	0.1706	downregulated	1	2.43397	0.0877
positive regulation of response to endoplasmic reticulum stress	GO	4 out of 6	2.46112	upregulated	2	0.971216	0.3786	upregulated	3	2.42545	0.0884	downregulated	3	2.38803	0.0918	downregulated	2	0.867145	0.4201	downregulated	2	1.09236	0.3354	downregulated	1	1.22727	0.2931
digestive system process	GO	3 out of 6	2.45878	upregulated	1	0.90384	0.405	upregulated	2	2.46685	0.0849	upregulated	2	1.65132	0.1918	downregulated	3	3.07524	0.0462	downregulated	4	2.46361	0.0851	upregulated	2	1.04776	0.3507
meiosis I	GO	3 out of 6	2.44923	upregulated	4	0.798448	0.45	upregulated	8	4.37802	0.0126	downregulated	6	1.7614	0.1718	downregulated	4	1.57158	0.2077	upregulated	6	2.28159	0.1021	downregulated	3	2.88734	0.0557
folic acid-containing compound metabolic process	GO	2 out of 6	2.44712	downregulated	1	0.529861	0.5887	upregulated	3	5.3727	0.0046	downregulated	5	2.83736	0.0586	downregulated	1	0.497778	0.6079	upregulated	2	1.29114	0.275	downregulated	1	2.23056	0.1075
response to nerve growth factor	GO	4 out of 6	2.44482	upregulated	1	0.221957	0.8009	upregulated	4	3.33784	0.0355	upregulated	3	2.73907	0.0646	upregulated	2	3.26968	0.038	upregulated	6	2.72378	0.0656	upregulated	3	4.39995	0.0123
positive regulation of potassium ion transmembrane transport	GO	2 out of 6	2.43272									downregulated	2	1.56384	0.2093	downregulated	1	0.600513	0.5485	downregulated	2	2.00307	0.1349	downregulated	1	2.59401	0.0747
protein transport along microtubule	GO	1 out of 6	2.42658	upregulated	1	4.25155	0.0142	downregulated	1	1.82497	0.1612
positive regulation of protein maturation	GO	3 out of 6	2.41964	downregulated	1	0.786226	0.4556	upregulated	3	4.27412	0.0139	downregulated	3	4.17162	0.0154	downregulated	2	5.68606	0.0034	downregulated	1	0.752606	0.4711	downregulated	4	8.03681	0.0003
adenohypophysis development	GO	1 out of 6	2.40584													upregulated	1	2.40584	0.0902
PERK-mediated unfolded protein response	GO	1 out of 6	2.39912					downregulated	1	1.71629	0.1797	upregulated	2	4.11542	0.0163
sperm motility	GO	4 out of 6	2.39467	upregulated	2	0.378756	0.6847	upregulated	3	1.04541	0.3515	downregulated	1	0.123359	0.8839	downregulated	1	0.188166	0.8285	downregulated	1	0.368711	0.6916	downregulated	1	0.913315	0.4012
phosphatidylethanolamine acyl-chain remodeling	GO	2 out of 6	2.39287					downregulated	1	1.13743	0.3206	downregulated	1	1.21764	0.2959					downregulated	1	1.63714	0.1945	downregulated	1	3.1108	0.0446
learned vocalization behavior or vocal learning	GO	1 out of 6	2.36784	upregulated	1	2.94037	0.0528					downregulated	1	0.572528	0.5641
regulation of removal of superoxide radicals	GO	2 out of 6	2.34922	upregulated	1	1.76009	0.172	upregulated	1	2.67324	0.069									upregulated	2	2.08412	0.1244
axonal transport	GO	3 out of 6	2.34534	downregulated	2	2.98459	0.0506	downregulated	2	1.13841	0.3203	upregulated	2	1.39359	0.2482	upregulated	1	1.38118	0.2513	upregulated	3	0.819213	0.4408	downregulated	1	0.708988	0.4921
hormone activity	GO	2 out of 6	2.33358	downregulated	3	4.14288	0.0159	downregulated	1	0.329124	0.7196	upregulated	2	2.22814	0.1077	upregulated	1	1.21252	0.2974	downregulated	3	0.713036	0.4902	downregulated	3	1.62054	0.1978
regulation of protein localization to centrosome	GO	2 out of 6	2.32896					upregulated	1	3.46834	0.0312	downregulated	1	1.19508	0.3027					downregulated	1	1.05012	0.3499	upregulated	1	0.994419	0.3699
intronic transcription regulatory region sequence-specific DNA binding	GO	3 out of 6	2.3183	upregulated	2	2.48764	0.0831	upregulated	2	3.12785	0.0438					upregulated	1	3.37486	0.0342	upregulated	2	3.25871	0.0384	upregulated	1	3.41334	0.0329
enzyme inhibitor activity	GO	1 out of 6	2.3181	upregulated	12	1.21415	0.297	upregulated	10	2.07821	0.1252	downregulated	14	1.43463	0.2382	downregulated	10	2.89975	0.055	downregulated	7	4.26545	0.014	upregulated	10	1.94735	0.1427
endoplasmic reticulum quality control compartment	GO	3 out of 6	2.2964	upregulated	1	0.335616	0.7149	upregulated	3	2.52381	0.0802	downregulated	1	0.149883	0.8608	downregulated	2	1.76939	0.1704					downregulated	1	1.35624	0.2576
ribosomal large subunit biogenesis	GO	3 out of 6	2.28154	upregulated	1	0.0606725	0.9411	upregulated	4	1.41084	0.2439	downregulated	2	0.196236	0.8218	downregulated	2	0.566125	0.5677	downregulated	4	1.57239	0.2075
negative regulation of cytokine production involved in inflammatory response	GO	1 out of 6	2.2639	upregulated	1	4.12137	0.0162													upregulated	1	1.85747	0.1561
positive regulation of signaling receptor activity	GO	3 out of 6	2.25378					upregulated	1	0.432523	0.6489	upregulated	3	3.5691	0.0282	upregulated	1	2.04584	0.1293	upregulated	6	1.75641	0.1727	upregulated	3	2.03728	0.1304
mechanosensory behavior	GO	1 out of 6	2.24446	upregulated	1	2.54825	0.0782					downregulated	1	0.303783	0.738
developmental growth	GO	3 out of 6	2.23819	downregulated	13	2.11098	0.1211	upregulated	8	3.37029	0.0344	upregulated	15	6.06004	0.0023	upregulated	6	4.34663	0.013	upregulated	34	3.6984	0.0248	upregulated	17	5.72939	0.0032
sodium channel regulator activity	GO	1 out of 6	2.22952	upregulated	3	6.91906	0.001	downregulated	1	2.50737	0.0815									upregulated	1	0.361667	0.6965	upregulated	1	1.8205	0.1619
positive regulation of flagellated sperm motility	GO	1 out of 6	2.22567									upregulated	1	2.22567	0.108
regulation of phospholipase C activity	GO	3 out of 6	2.21833	upregulated	2	2.69594	0.0675	upregulated	2	6.26747	0.0019	downregulated	3	2.06016	0.1274	upregulated	1	1.55327	0.2116	upregulated	4	3.1954	0.041	upregulated	2	3.04279	0.0477
protein insertion into membrane	GO	1 out of 6	2.20961	downregulated	2	2.46942	0.0846					downregulated	1	0.712202	0.4906	downregulated	1	0.749606	0.4726	downregulated	3	3.67141	0.0254
carbohydrate metabolic process	GO	1 out of 6	2.1996	downregulated	6	3.35987	0.0347	upregulated	21	4.65	0.0096	upregulated	16	4.67798	0.0093	downregulated	18	2.64967	0.0707	downregulated	13	4.01676	0.018	upregulated	16	1.81716	0.1625
positive regulation of extrinsic apoptotic signaling pathway	GO	2 out of 6	2.19353	upregulated	2	0.13996	0.8694	upregulated	4	9.37475	8.5e-05	downregulated	4	0.674418	0.5095	downregulated	5	2.36099	0.0943	upregulated	5	1.01262	0.3633	upregulated	6	3.27316	0.0379
aromatic amino acid family metabolic process	GO	3 out of 6	2.18899	downregulated	2	1.99074	0.1366	downregulated	1	0.882816	0.4136	upregulated	2	2.4522	0.0861	upregulated	1	1.63705	0.1946	upregulated	1	1.27853	0.2784	downregulated	1	2.25182	0.1052
positive regulation of protein localization to membrane	GO	4 out of 6	2.18508	upregulated	9	2.46517	0.085	upregulated	5	1.9531	0.1418	downregulated	8	2.29025	0.1012	downregulated	6	2.96586	0.0515	downregulated	4	1.88608	0.1517	downregulated	2	1.13684	0.3208
cytoplasmic translation	GO	4 out of 6	2.17705	upregulated	2	0.442248	0.6426	upregulated	1	1.07009	0.343	downregulated	3	0.346145	0.7074	downregulated	2	1.36315	0.2559	downregulated	3	1.4217	0.2413	downregulated	1	0.952307	0.3858
response to oxidative stress	GO	3 out of 6	2.17612	downregulated	10	2.58278	0.0756	upregulated	15	2.97847	0.0509	downregulated	30	6.31642	0.0018	downregulated	20	3.79809	0.0224	downregulated	25	9.65938	6.4e-05	downregulated	9	2.23556	0.1069
proteasome core complex	GO	1 out of 6	2.17424					upregulated	1	1.72729	0.1778	downregulated	3	2.10368	0.122	downregulated	2	2.16569	0.1147	downregulated	2	2.17424	0.1137
positive regulation of podosome assembly	GO	2 out of 6	2.12399					upregulated	1	2.83339	0.0588									upregulated	2	2.77428	0.0624	downregulated	1	2.06488	0.1268
protein localization to cytoskeleton	GO	4 out of 6	2.08406	upregulated	4	3.11437	0.0444	upregulated	1	0.300507	0.7404	downregulated	5	4.27759	0.0139	downregulated	2	1.46004	0.2322	downregulated	1	0.623364	0.5361	downregulated	3	3.78344	0.0227
outer mitochondrial membrane protein complex	GO	3 out of 6	2.07324	upregulated	1	0.702666	0.4953	upregulated	1	0.992992	0.3705	downregulated	2	1.5654	0.209					downregulated	1	1.94298	0.1433
maintenance of protein location	GO	4 out of 6	2.05625	upregulated	6	3.61636	0.0269	upregulated	6	5.08485	0.0062	downregulated	11	4.01075	0.0181	downregulated	7	5.66816	0.0035	downregulated	5	2.53061	0.0796	downregulated	2	0.503331	0.6045
sensory perception of light stimulus	GO	3 out of 6	1.99551	upregulated	9	3.96252	0.019	upregulated	4	1.25245	0.2858	upregulated	7	2.15518	0.1159	downregulated	6	2.42118	0.0888	upregulated	7	0.806694	0.4463	upregulated	4	2.14676	0.1169
brush border	GO	1 out of 6	1.99461	downregulated	1	0.929334	0.3948	upregulated	2	0.157627	0.8542	downregulated	11	8.58677	0.0002	downregulated	7	5.75867	0.0032	downregulated	6	4.14656	0.0158	upregulated	4	2.15195	0.1163
ATP-dependent microtubule motor activity	GO	3 out of 6	1.98178	upregulated	1	1.34154	0.2614	upregulated	1	1.05104	0.3496	downregulated	4	2.239	0.1066	downregulated	1	0.246774	0.7813	downregulated	1	2.07498	0.1256
TBP-class protein binding	GO	2 out of 6	1.97717	upregulated	3	2.07199	0.1259	upregulated	1	1.33686	0.2627					downregulated	2	1.43169	0.2389
histone binding	GO	4 out of 6	1.96018	upregulated	14	2.43839	0.0873	upregulated	17	7.50062	0.0006	upregulated	5	1.28078	0.2778	upregulated	5	2.88803	0.0557	upregulated	22	6.33528	0.0018	upregulated	13	5.81237	0.003
cell death in response to oxidative stress	GO	2 out of 6	1.95344	downregulated	1	0.950045	0.3867	downregulated	1	1.88072	0.1525	upregulated	1	0.969023	0.3795					downregulated	2	3.81518	0.022
retrograde transport, endosome to plasma membrane	GO	3 out of 6	1.94885	upregulated	3	4.46077	0.0116	downregulated	2	3.2497	0.0388	upregulated	1	2.57685	0.076	upregulated	1	1.8279	0.1608	upregulated	2	1.92252	0.1462	upregulated	1	1.74445	0.1747
negative regulation of viral-induced cytoplasmic pattern recognition receptor signaling pathway	GO	2 out of 6	1.93898					upregulated	2	3.2808	0.0376	downregulated	1	2.86575	0.0569					downregulated	1	2.9722	0.0512	upregulated	1	1.44826	0.235
positive regulation of cytokine production involved in inflammatory response	GO	2 out of 6	1.928	downregulated	2	3.30334	0.0368	upregulated	2	3.90022	0.0202									downregulated	1	1.33112	0.2642
Arp2/3 protein complex	GO	1 out of 6	1.92222									upregulated	1	1.17199	0.3097	upregulated	1	2.71908	0.0659	downregulated	2	3.25623	0.0385	upregulated	1	1.33401	0.2634
adult behavior	GO	2 out of 6	1.92125	upregulated	11	6.09967	0.0022	downregulated	1	0.483806	0.6164	upregulated	9	6.70864	0.0012	downregulated	7	4.62831	0.0098	upregulated	6	1.5491	0.2124	upregulated	4	4.22584	0.0146
cerebellum development	GO	3 out of 6	1.90329	upregulated	4	2.36793	0.0937	upregulated	5	2.56118	0.0772	downregulated	8	3.5035	0.0301	downregulated	2	0.354396	0.7016	downregulated	3	1.60586	0.2007	upregulated	2	0.773779	0.4613
regulation of carbohydrate metabolic process	GO	1 out of 6	1.90151	upregulated	7	2.84424	0.0582	downregulated	6	2.33068	0.0972	upregulated	4	1.69507	0.1836	downregulated	5	2.89709	0.0552	upregulated	12	1.95956	0.1409	downregulated	6	3.86107	0.021
intramolecular oxidoreductase activity	GO	3 out of 6	1.88768	downregulated	1	1.30421	0.2714	upregulated	2	1.74368	0.1749	upregulated	2	1.25655	0.2846	downregulated	1	1.76015	0.172	downregulated	2	2.56435	0.077	upregulated	1	0.612548	0.542
proteasome regulatory particle, base subcomplex	GO	1 out of 6	1.87662					upregulated	1	1.87662	0.1531
phosphatidylinositol phosphate phosphatase activity	GO	3 out of 6	1.86824	upregulated	4	2.31942	0.0983	downregulated	1	0.783275	0.4569	downregulated	3	2.53292	0.0794	upregulated	1	2.72501	0.0655	downregulated	1	1.71401	0.1801	upregulated	2	1.57401	0.2072
basic amino acid transmembrane transport	GO	1 out of 6	1.85068																					downregulated	1	1.85068	0.1571
maintenance of protein location in cell	GO	4 out of 6	1.84713	upregulated	5	3.44691	0.0318	upregulated	6	6.90128	0.001	downregulated	11	5.8569	0.0029	downregulated	6	6.00848	0.0025	downregulated	4	2.57614	0.0761	downregulated	2	0.788178	0.4547
acetylcholine receptor signaling pathway	GO	2 out of 6	1.84576									upregulated	1	4.92959	0.0072	downregulated	1	3.83811	0.0215	upregulated	1	0.551993	0.5758	downregulated	1	1.30627	0.2708
response to acetylcholine	GO	2 out of 6	1.84576									upregulated	1	4.92959	0.0072	downregulated	1	3.83811	0.0215	upregulated	1	0.551993	0.5758	downregulated	1	1.30627	0.2708
endoplasmic reticulum tubular network organization	GO	1 out of 6	1.80339	upregulated	3	5.1678	0.0057					downregulated	2	2.20018	0.1108	downregulated	1	1.16423	0.3122
glutathione binding	GO	1 out of 6	1.79567	upregulated	1	1.79567	0.166
positive regulation of macrophage migration	GO	2 out of 6	1.78631					upregulated	1	6.91158	0.001	downregulated	1	2.18321	0.1127	downregulated	2	3.96617	0.0189	downregulated	1	1.02411	0.3591
DNA biosynthetic process	GO	2 out of 6	1.77638	upregulated	5	0.7355	0.4793	upregulated	10	9.8024	5.5e-05	downregulated	4	0.131745	0.8766	downregulated	4	1.42514	0.2405	upregulated	12	4.48101	0.0113	upregulated	6	2.72362	0.0656
leukocyte adhesion to vascular endothelial cell	GO	2 out of 6	1.75533					upregulated	1	3.97472	0.0188	upregulated	1	1.35434	0.2581	downregulated	1	2.31507	0.0988	upregulated	2	1.25867	0.284
NIK/NF-kappaB signaling	GO	3 out of 6	1.75508	upregulated	3	1.62635	0.1966	upregulated	1	2.83176	0.0589	upregulated	1	2.68256	0.0684	downregulated	3	1.81534	0.1628	upregulated	4	1.69531	0.1835	upregulated	4	3.57025	0.0281
ER overload response	GO	3 out of 6	1.74899	upregulated	1	0.854083	0.4257	upregulated	2	2.71787	0.066	upregulated	1	2.72444	0.0656	downregulated	1	1.16589	0.3116	upregulated	1	1.54307	0.2137	upregulated	1	1.83844	0.1591
chloride ion binding	GO	2 out of 6	1.74839									upregulated	1	1.75797	0.1724	downregulated	2	2.80038	0.0608	downregulated	2	2.7908	0.0614
leukotriene D4 biosynthetic process	GO	1 out of 6	1.74308					upregulated	1	2.85468	0.0576	downregulated	1	1.1116	0.329
adenylate cyclase-activating adrenergic receptor signaling pathway	GO	2 out of 6	1.74073					upregulated	1	0.919202	0.3988	downregulated	1	0.26833	0.7647					downregulated	1	2.40786	0.09	upregulated	1	1.31801	0.2677
adrenergic receptor signaling pathway	GO	2 out of 6	1.74073					upregulated	1	0.919202	0.3988	downregulated	1	0.26833	0.7647					downregulated	1	2.40786	0.09	upregulated	1	1.31801	0.2677
spindle	GO	2 out of 6	1.73272	upregulated	27	6.16406	0.0021	upregulated	20	6.456	0.0016	downregulated	28	3.79928	0.0224	downregulated	16	2.33411	0.0969	downregulated	9	0.796833	0.4508	downregulated	6	0.935887	0.3922
regulation of microtubule binding	GO	1 out of 6	1.72684	upregulated	2	3.79393	0.0225					downregulated	1	0.879127	0.4151									upregulated	1	1.18796	0.3048
insulin receptor binding	GO	1 out of 6	1.72298	upregulated	2	2.76706	0.0628	upregulated	1	2.01078	0.1339	upregulated	2	1.78578	0.1677	downregulated	1	1.21769	0.2959	upregulated	1	0.717573	0.4879	downregulated	2	2.44055	0.0871
regulation of flagellated sperm motility	GO	1 out of 6	1.7077									upregulated	1	1.7077	0.1813
positive regulation of feeding behavior	GO	1 out of 6	1.68702	upregulated	1	1.68702	0.1851
telomeric loop disassembly	GO	2 out of 6	1.67643	upregulated	1	1.55757	0.2106	upregulated	1	2.9461	0.0525									upregulated	1	1.46381	0.2314	upregulated	1	1.36343	0.2558
peroxisomal membrane	GO	1 out of 6	1.67621	upregulated	5	3.83412	0.0216	upregulated	5	4.17302	0.0154	upregulated	6	5.41453	0.0045	downregulated	2	1.44811	0.235	downregulated	4	2.82788	0.0591	upregulated	3	1.15167	0.3161
regulation of postsynaptic membrane organization	GO	1 out of 6	1.67242					upregulated	2	3.98015	0.0187					upregulated	1	2.78381	0.0618	upregulated	1	1.11139	0.3291
macromolecule depalmitoylation	GO	3 out of 6	1.66623	upregulated	2	3.1494	0.0429	upregulated	1	1.94202	0.1434	downregulated	2	3.7076	0.0245					downregulated	1	2.7254	0.0655	upregulated	1	2.443	0.0869
palmitoyl hydrolase activity	GO	3 out of 6	1.66623	upregulated	2	3.1494	0.0429	upregulated	1	1.94202	0.1434	downregulated	2	3.7076	0.0245					downregulated	1	2.7254	0.0655	upregulated	1	2.443	0.0869
transcription coactivator binding	GO	2 out of 6	1.65145	upregulated	1	0.292769	0.7462					downregulated	1	0.278813	0.7567					upregulated	1	0.703077	0.4951	downregulated	1	2.34058	0.0963
cell redox homeostasis	GO	3 out of 6	1.64977	downregulated	1	0.496337	0.6088	upregulated	2	1.16849	0.3108	upregulated	1	0.209995	0.8106					downregulated	4	2.3734	0.0932	upregulated	3	1.60578	0.2007
proteasome regulatory particle	GO	1 out of 6	1.64525	upregulated	1	0.930435	0.3944	upregulated	1	1.37682	0.2524	upregulated	1	1.2396	0.2895					downregulated	1	1.64525	0.193
positive regulation of proteolysis involved in cellular protein catabolic process	GO	4 out of 6	1.64032	upregulated	8	1.87332	0.1536	upregulated	7	2.80364	0.0606	downregulated	12	4.625	0.0098	downregulated	7	1.60146	0.2016	downregulated	6	1.91748	0.147	downregulated	3	1.27234	0.2802
positive regulation of extrinsic apoptotic signaling pathway via death domain receptors	GO	2 out of 6	1.62742									upregulated	1	1.09048	0.3361	upregulated	1	2.93877	0.0529	upregulated	2	0.897419	0.4076	upregulated	2	1.50441	0.2221
nitric oxide biosynthetic process	GO	1 out of 6	1.59855																					downregulated	1	1.59855	0.2022
positive regulation of stem cell differentiation	GO	3 out of 6	1.5914	upregulated	2	2.68547	0.0682	upregulated	1	0.600322	0.5486	upregulated	1	0.947414	0.3877					downregulated	1	2.06881	0.1263	upregulated	2	2.64181	0.0712
canonical glycolysis	GO	1 out of 6	1.58834					downregulated	1	2.13072	0.1188					downregulated	1	0.965889	0.3806	downregulated	2	5.21459	0.0054	upregulated	1	0.529634	0.5888
TRIF-dependent toll-like receptor signaling pathway	GO	1 out of 6	1.58659					upregulated	3	7.6212	0.0005	downregulated	2	1.63946	0.1941	downregulated	2	2.36467	0.094	upregulated	2	1.21652	0.2963	upregulated	1	0.813961	0.4431
regulation of fibroblast apoptotic process	GO	2 out of 6	1.56916	upregulated	3	2.6379	0.0715	downregulated	1	1.32426	0.266	upregulated	1	0.808017	0.4457					upregulated	1	0.55249	0.5755
regulation of membrane permeability	GO	3 out of 6	1.56702	downregulated	4	2.06615	0.1267	downregulated	1	0.559117	0.5717	downregulated	6	2.7078	0.0667	upregulated	1	1.59532	0.2028	downregulated	3	2.68811	0.068	downregulated	2	2.61666	0.073
positive regulation of cation channel activity	GO	2 out of 6	1.56377	upregulated	4	5.48135	0.0042					downregulated	2	1.78642	0.1676	downregulated	2	3.55951	0.0285	upregulated	5	1.41671	0.2425	downregulated	2	2.84506	0.0581
RNA phosphodiester bond hydrolysis	GO	3 out of 6	1.5226	upregulated	8	1.92231	0.1463	upregulated	15	13.1295	2e-06	downregulated	14	6.90587	0.001	downregulated	11	6.82179	0.0011	downregulated	2	0.504095	0.6041	upregulated	3	0.305598	0.7367
pteridine-containing compound metabolic process	GO	2 out of 6	1.50485	downregulated	2	1.87255	0.1537	upregulated	3	5.17894	0.0056	downregulated	6	2.72442	0.0656	downregulated	2	1.20841	0.2987	downregulated	2	1.48913	0.2256	downregulated	1	2.13129	0.1187
hindbrain development	GO	3 out of 6	1.49627	upregulated	5	1.98689	0.1371	upregulated	6	2.30547	0.0997	downregulated	8	2.31406	0.0989	downregulated	3	0.37508	0.6872	upregulated	9	1.24413	0.2882	downregulated	3	1.13717	0.3207
low-density lipoprotein particle binding	GO	1 out of 6	1.49308									upregulated	1	5.04715	0.0064	downregulated	2	3.55407	0.0286
calcium channel regulator activity	GO	1 out of 6	1.47777	upregulated	5	6.83381	0.0011	upregulated	2	3.41807	0.0328	downregulated	3	0.730145	0.4818					downregulated	2	1.47777	0.2281
negative regulation of cellular response to insulin stimulus	GO	4 out of 6	1.47749	downregulated	3	2.95331	0.0522	upregulated	2	0.802745	0.4481	upregulated	1	0.460389	0.631					downregulated	2	1.13168	0.3225	downregulated	2	2.03598	0.1306
platelet morphogenesis	GO	2 out of 6	1.47512	upregulated	1	4.10551	0.0165	upregulated	1	1.32285	0.2664	downregulated	3	1.80659	0.1642					upregulated	1	2.14664	0.1169
mitochondrial small ribosomal subunit	GO	1 out of 6	1.43596	upregulated	2	1.17779	0.308	downregulated	1	1.40404	0.2456	upregulated	1	0.880227	0.4147					downregulated	1	1.43596	0.2379
peptidase inhibitor activity	GO	3 out of 6	1.42052	downregulated	5	2.50145	0.082	upregulated	4	2.39254	0.0914	upregulated	3	1.17768	0.308	upregulated	2	2.25722	0.1046	downregulated	3	2.53912	0.0789	upregulated	3	2.18738	0.1122
RNA stem-loop binding	GO	2 out of 6	1.41268					upregulated	1	0.591508	0.5535	downregulated	2	1.60889	0.2001	upregulated	1	4.09359	0.0167	upregulated	1	0.951988	0.386	upregulated	1	0.711535	0.4909
regulation of centrosome cycle	GO	2 out of 6	1.37929	upregulated	5	2.84501	0.0581	upregulated	4	3.89559	0.0203	downregulated	7	3.09263	0.0454	downregulated	2	0.526589	0.5906	upregulated	2	1.04673	0.3511	upregulated	2	0.695366	0.4989
Derlin-1 retrotranslocation complex	GO	2 out of 6	1.37832	upregulated	1	1.76853	0.1706	upregulated	1	1.04588	0.3514					downregulated	1	1.43609	0.2379
response to angiotensin	GO	2 out of 6	1.37156					upregulated	2	2.75104	0.0639	downregulated	3	1.4214	0.2414	downregulated	3	4.35126	0.0129	downregulated	1	1.96159	0.1406	downregulated	2	4.39319	0.0124
regulation of Wnt signaling pathway, planar cell polarity pathway	GO	1 out of 6	1.37116	upregulated	1	2.14805	0.1167					downregulated	1	0.776888	0.4598
signal sequence binding	GO	1 out of 6	1.368	upregulated	3	0.643358	0.5255	downregulated	1	0.520566	0.5942	upregulated	3	3.33685	0.0355	downregulated	1	0.189167	0.8276	downregulated	3	2.55982	0.0773	upregulated	1	1.19182	0.3037
heart contraction	GO	4 out of 6	1.36694	upregulated	6	5.19365	0.0056	downregulated	5	7.89825	0.0004	upregulated	4	1.4987	0.2234	upregulated	2	3.05201	0.0473	downregulated	5	3.08597	0.0457	upregulated	3	3.56513	0.0283
membrane coat	GO	2 out of 6	1.35096	downregulated	3	1.74875	0.174	downregulated	3	1.20941	0.2984	downregulated	6	1.73587	0.1762	upregulated	2	1.94882	0.1424	downregulated	7	4.09617	0.0166	downregulated	2	0.874304	0.4172
peptidase activator activity	GO	4 out of 6	1.3265	downregulated	2	1.35176	0.2588	upregulated	4	2.40964	0.0898	upregulated	2	2.93951	0.0529	downregulated	6	5.14518	0.0058	downregulated	2	1.34776	0.2598	downregulated	1	1.12653	0.3242
oxidoreductase activity, acting on peroxide as acceptor	GO	2 out of 6	1.32403	downregulated	1	0.718808	0.4873	downregulated	1	1.16766	0.3111	downregulated	4	6.83376	0.0011	downregulated	3	4.02889	0.0178	downregulated	4	4.00195	0.0183	downregulated	2	8.90354	0.0001
cellular response to nerve growth factor stimulus	GO	4 out of 6	1.32376	upregulated	1	0.243817	0.7836	upregulated	3	2.38055	0.0925	upregulated	3	2.8946	0.0553	upregulated	2	3.3659	0.0345	upregulated	6	2.98494	0.0505	upregulated	3	4.57616	0.0103
regulation of mitochondrial membrane permeability involved in apoptotic process	GO	2 out of 6	1.31963	downregulated	1	1.21785	0.2959	upregulated	1	0.616279	0.54					upregulated	1	2.82719	0.0592	upregulated	1	0.267083	0.7656	upregulated	1	0.638908	0.5279
regulation of glutamate secretion	GO	3 out of 6	1.31723	upregulated	2	1.60561	0.2008					downregulated	1	2.83212	0.0589	upregulated	1	2.56047	0.0773	upregulated	1	1.87012	0.1541	downregulated	1	1.85339	0.1567
cell cycle G1/S phase transition	GO	3 out of 6	1.3087	upregulated	7	1.1765	0.3084	upregulated	14	12.9347	2.4e-06	upregulated	5	2.3156	0.0987	downregulated	11	5.5633	0.0038	upregulated	11	4.77741	0.0084	upregulated	6	4.77741	0.0084
positive regulation of telomere maintenance via telomere lengthening	GO	2 out of 6	1.30399	upregulated	3	2.69971	0.0672	downregulated	1	3.68984	0.025	downregulated	3	3.52343	0.0295	downregulated	3	4.16066	0.0156	downregulated	7	9.97821	4.6e-05
protein localization to cilium	GO	4 out of 6	1.29511	upregulated	4	1.98165	0.1378	upregulated	2	0.851141	0.4269	upregulated	3	2.78136	0.062	upregulated	1	1.40992	0.2442	upregulated	3	2.06972	0.1262	upregulated	2	3.65924	0.0258
oxidoreductase activity, acting on paired donors, with incorporation or reduction of molecular oxygen	GO	2 out of 6	1.28851	downregulated	4	1.48768	0.2259	downregulated	3	3.28989	0.0373	downregulated	9	1.41049	0.244	downregulated	8	2.72274	0.0657	downregulated	8	5.66107	0.0035	downregulated	6	4.53823	0.0107
bone growth	GO	3 out of 6	1.28102	downregulated	3	2.37576	0.0929					downregulated	3	2.5087	0.0814	upregulated	1	1.99905	0.1355	downregulated	2	2.34152	0.0962	downregulated	2	1.8249	0.1612
hormone metabolic process	GO	4 out of 6	1.27692	upregulated	3	1.38706	0.2498	upregulated	2	0.925225	0.3964	downregulated	9	3.39497	0.0335	downregulated	10	4.92484	0.0073	downregulated	4	4.45169	0.0117	downregulated	6	2.83275	0.0589
multicellular organismal homeostasis	GO	3 out of 6	1.27062	upregulated	11	2.87607	0.0564	upregulated	10	4.35325	0.0129	downregulated	18	4.97685	0.0069	downregulated	12	5.55289	0.0039	upregulated	15	1.52619	0.2174	downregulated	10	4.57103	0.0103
regulation of viral genome replication	GO	1 out of 6	1.26647	downregulated	5	2.65344	0.0704	upregulated	8	8.49811	0.0002	downregulated	1	0.0123737	0.9877					upregulated	3	2.63016	0.0721	upregulated	1	1.93566	0.1443
methyl-CpG binding	GO	2 out of 6	1.25201	upregulated	1	0.463097	0.6293					upregulated	1	1.14594	0.3179					upregulated	1	0.357034	0.6997
organelle inheritance	GO	1 out of 6	1.25154					upregulated	1	1.25154	0.2861
locomotory exploration behavior	GO	2 out of 6	1.24602	upregulated	1	2.96771	0.0514	upregulated	1	1.10056	0.3327									upregulated	2	2.82224	0.0595
negative regulation of cell size	GO	2 out of 6	1.23926									upregulated	1	1.94523	0.143	upregulated	1	3.89833	0.0203	upregulated	1	1.71943	0.1792	upregulated	1	2.88487	0.0559
mitochondrial outer membrane	GO	1 out of 6	1.23633	downregulated	4	0.988315	0.3722	upregulated	7	3.0555	0.0471	downregulated	11	4.8292	0.008	downregulated	7	2.41123	0.0897	downregulated	6	3.29707	0.037	upregulated	9	2.06074	0.1274
MHC protein binding	GO	2 out of 6	1.23631	downregulated	1	2.07521	0.1255	upregulated	1	2.26112	0.1042	downregulated	4	6.21452	0.002	downregulated	2	4.11171	0.0164	downregulated	5	11.3766	1.1e-05
insulin receptor substrate binding	GO	3 out of 6	1.2338	upregulated	2	2.38991	0.0916	upregulated	1	0.88142	0.4142	downregulated	1	2.11974	0.1201	downregulated	1	1.66697	0.1888					downregulated	1	1.74918	0.1739
regulation of nucleocytoplasmic transport	GO	3 out of 6	1.23149	upregulated	5	1.20016	0.3011	upregulated	6	2.60057	0.0742	downregulated	7	0.918035	0.3993	downregulated	7	1.79677	0.1658	upregulated	10	2.80508	0.0605	downregulated	2	2.95065	0.0523
pre-mRNA cleavage required for polyadenylation	GO	2 out of 6	1.22653					upregulated	1	1.36341	0.2558	upregulated	1	1.75397	0.1731	downregulated	1	1.89085	0.1509
cytoplasmic side of endoplasmic reticulum membrane	GO	1 out of 6	1.21125													downregulated	1	1.33827	0.2623	downregulated	1	2.54951	0.0781
programmed necrotic cell death	GO	1 out of 6	1.20857					upregulated	2	7.4595	0.0006	downregulated	2	0.869313	0.4192	downregulated	2	2.08287	0.1246	upregulated	3	2.24912	0.1055	upregulated	1	1.04962	0.3501
axoneme	GO	1 out of 6	1.19113	upregulated	8	2.97849	0.0509	downregulated	1	0.10522	0.9001	downregulated	1	1.48897	0.2256	upregulated	2	1.58623	0.2047	downregulated	2	1.27682	0.2789	upregulated	1	0.0856972	0.9179
intrinsic component of Golgi membrane	GO	3 out of 6	1.18884	downregulated	1	0.715143	0.4891	upregulated	4	4.47092	0.0114	upregulated	3	3.55387	0.0286	downregulated	5	5.93008	0.0027	downregulated	1	0.812938	0.4436	upregulated	1	1.00366	0.3665
phosphatase regulator activity	GO	2 out of 6	1.18779	upregulated	8	4.57581	0.0103	upregulated	5	4.13209	0.016	downregulated	5	1.18401	0.3061	downregulated	6	3.91193	0.02	upregulated	8	1.83258	0.16	upregulated	2	0.591602	0.5534
positive regulation of calcium ion transmembrane transport	GO	2 out of 6	1.18658	upregulated	6	7.53483	0.0005	downregulated	1	2.93401	0.0532	downregulated	4	4.25308	0.0142	downregulated	1	0.414743	0.6605	upregulated	3	3.02769	0.0484	downregulated	3	4.28128	0.0138
activin binding	GO	2 out of 6	1.16829	upregulated	4	4.57594	0.0103					downregulated	2	2.19094	0.1118	downregulated	2	2.45145	0.0862	downregulated	1	2.25412	0.105	upregulated	1	1.01938	0.3608
negative regulation of neuron migration	GO	2 out of 6	1.16715	upregulated	2	3.19226	0.0411					upregulated	1	1.00732	0.3652					upregulated	2	1.80677	0.1642	upregulated	1	1.22565	0.2936
amino acid transport	GO	3 out of 6	1.16383	upregulated	6	6.26212	0.0019	upregulated	2	2.77772	0.0622	upregulated	5	8.49919	0.0002	downregulated	5	2.18313	0.1127	upregulated	10	6.25441	0.0019	upregulated	9	7.93765	0.0004
negative regulation of gene expression, epigenetic	GO	2 out of 6	1.15815	upregulated	3	1.17787	0.3079	upregulated	7	6.44539	0.0016	downregulated	7	2.23502	0.107	downregulated	4	1.79198	0.1666	upregulated	6	0.908216	0.4032	upregulated	4	1.52989	0.2166
protein transmembrane transporter activity	GO	3 out of 6	1.1519	upregulated	1	0.518862	0.5952					downregulated	1	6.50167	0.0015					downregulated	3	5.12085	0.006	downregulated	1	2.01386	0.1335
regulation of cellular response to hypoxia	GO	2 out of 6	1.12675					downregulated	1	2.01267	0.1336	upregulated	1	2.26655	0.1037					downregulated	1	2.128	0.1191	upregulated	1	1.25513	0.285
regulation of Golgi organization	GO	3 out of 6	1.11604	upregulated	2	2.99181	0.0502	upregulated	1	0.712587	0.4904	downregulated	2	2.56905	0.0766	downregulated	2	2.31012	0.0992	downregulated	2	2.29082	0.1012
mRNA cap binding complex	GO	1 out of 6	1.10576									upregulated	1	1.68158	0.1861	downregulated	1	2.51027	0.0812	upregulated	1	0.53643	0.5848	downregulated	1	1.64219	0.1936
nitrogen cycle metabolic process	GO	1 out of 6	1.10502																	downregulated	1	2.94599	0.0525	upregulated	1	1.84097	0.1587
reactive nitrogen species metabolic process	GO	2 out of 6	1.08139									upregulated	2	3.21241	0.0403	downregulated	1	3.44137	0.032					downregulated	1	1.31034	0.2697
regulation of double-strand break repair via nonhomologous end joining	GO	2 out of 6	1.07778					upregulated	1	0.747067	0.4738	upregulated	1	1.24784	0.2871	downregulated	1	0.917126	0.3997
positive regulation of protein acetylation	GO	3 out of 6	1.07513	downregulated	1	2.00947	0.1341	upregulated	3	3.0957	0.0452	upregulated	1	0.488267	0.6137					upregulated	5	2.63073	0.072	downregulated	2	2.13136	0.1187
positive regulation of insulin secretion involved in cellular response to glucose stimulus	GO	2 out of 6	1.05811	upregulated	2	1.45849	0.2326					upregulated	1	0.751989	0.4714					upregulated	3	1.15237	0.3159
negative regulation of DNA biosynthetic process	GO	3 out of 6	1.04744	upregulated	3	2.02412	0.1321	upregulated	2	2.77032	0.0626	downregulated	3	1.54932	0.2124	downregulated	1	0.758712	0.4683	upregulated	4	4.16873	0.0155	downregulated	2	2.72977	0.0652
nuclear inner membrane	GO	1 out of 6	1.03309	upregulated	3	0.977608	0.3762	upregulated	3	1.98119	0.1379	downregulated	4	2.68043	0.0685	downregulated	2	1.55495	0.2112	upregulated	4	3.82795	0.0218	downregulated	1	1.03309	0.3559
maintenance of location in cell	GO	4 out of 6	1.03303	upregulated	5	2.92391	0.0537	upregulated	8	7.11867	0.0008	downregulated	13	5.67244	0.0034	downregulated	6	5.79076	0.0031	downregulated	4	1.89315	0.1506	downregulated	2	0.560492	0.5709
nuclear envelope	GO	1 out of 6	1.02713	upregulated	29	3.07776	0.0461	upregulated	21	2.80842	0.0603	downregulated	37	6.06532	0.0023	downregulated	27	6.45673	0.0016	downregulated	23	4.56326	0.0104	upregulated	20	3.53613	0.0291
toxic substance binding	GO	1 out of 6	1.01597	downregulated	1	2.36425	0.094													downregulated	1	3.38022	0.034
regulation of body fluid levels	GO	2 out of 6	1.00981	downregulated	9	1.37075	0.2539	upregulated	19	9.45493	7.8e-05	downregulated	33	3.4715	0.0311	downregulated	23	4.18702	0.0152	downregulated	10	1.86013	0.1557	downregulated	3	0.584156	0.5576
polysome	GO	1 out of 6	0.970274	upregulated	2	0.370377	0.6905	upregulated	2	1.14056	0.3196	upregulated	3	1.72701	0.1778	upregulated	1	1.18517	0.3057	downregulated	3	1.54783	0.2127	upregulated	2	0.577558	0.5613
regulation of smooth muscle cell proliferation	GO	4 out of 6	0.969206	upregulated	5	4.12165	0.0162	upregulated	3	0.606154	0.5454	upregulated	7	3.96553	0.019	downregulated	9	5.7469	0.0032	downregulated	5	1.85816	0.156	upregulated	7	3.83538	0.0216
regulation of NLRP3 inflammasome complex assembly	GO	1 out of 6	0.950868					upregulated	1	4.04199	0.0176	downregulated	1	1.50557	0.2219					upregulated	1	1.58555	0.2048
filopodium	GO	3 out of 6	0.934893	downregulated	3	4.70016	0.0091	downregulated	2	2.86329	0.0571	downregulated	8	1.21231	0.2975	upregulated	1	3.08964	0.0455	downregulated	3	3.70835	0.0245	downregulated	2	2.91266	0.0543
pigment granule organization	GO	1 out of 6	0.925962	downregulated	1	0.848355	0.4281					upregulated	2	2.10306	0.1221					upregulated	1	0.328739	0.7198
cell aging	GO	3 out of 6	0.908418	upregulated	3	1.96948	0.1395	upregulated	3	1.65623	0.1909	downregulated	4	1.04978	0.35	downregulated	2	1.21989	0.2953	downregulated	2	1.41886	0.242	upregulated	3	1.86649	0.1547
spindle elongation	GO	2 out of 6	0.893155	upregulated	1	0.875201	0.4168	upregulated	1	4.47555	0.0114	downregulated	1	0.717273	0.4881	downregulated	1	1.18101	0.307	upregulated	2	2.55931	0.0774
cellular response to catecholamine stimulus	GO	3 out of 6	0.864008	upregulated	3	3.20331	0.0406	downregulated	1	3.69315	0.0249	downregulated	3	1.38596	0.2501	downregulated	1	0.433549	0.6482	downregulated	2	1.79421	0.1663	downregulated	1	1.37914	0.2518
response to monoamine	GO	3 out of 6	0.862085	upregulated	3	3.04033	0.0478	downregulated	1	3.57121	0.0281	downregulated	3	1.26599	0.282	downregulated	1	0.396885	0.6724	downregulated	2	1.71866	0.1793	downregulated	1	1.33718	0.2626
response to catecholamine	GO	3 out of 6	0.862085	upregulated	3	3.04033	0.0478	downregulated	1	3.57121	0.0281	downregulated	3	1.26599	0.282	downregulated	1	0.396885	0.6724	downregulated	2	1.71866	0.1793	downregulated	1	1.33718	0.2626
intra-Golgi vesicle-mediated transport	GO	3 out of 6	0.822752	upregulated	2	1.68332	0.1858	upregulated	1	0.304474	0.7375	downregulated	3	2.36182	0.0942	downregulated	1	1.153	0.3157	downregulated	3	2.99579	0.05	upregulated	1	0.646015	0.5241
negative regulation of viral life cycle	GO	1 out of 6	0.801683	downregulated	3	1.31669	0.268	upregulated	7	7.69273	0.0005	downregulated	2	0.541584	0.5818					upregulated	5	2.86791	0.0568	upregulated	4	2.16487	0.1148
thiolester hydrolase activity	GO	3 out of 6	0.774411	upregulated	2	1.29163	0.2748	upregulated	1	0.964281	0.3813	downregulated	2	1.73878	0.1757					downregulated	1	1.60706	0.2005	upregulated	1	1.34977	0.2593
body fluid secretion	GO	4 out of 6	0.76777	downregulated	2	2.61831	0.0729	upregulated	1	1.92434	0.146	upregulated	2	0.59033	0.5541	upregulated	1	1.28976	0.2753	downregulated	4	2.21729	0.1089	upregulated	2	2.63564	0.0717
response to virus	GO	2 out of 6	0.763326	downregulated	10	2.62775	0.0722	upregulated	17	13.4752	1.4e-06	downregulated	18	2.54911	0.0782	downregulated	14	6.76244	0.0012	upregulated	15	2.03364	0.1309	downregulated	5	1.26105	0.2834
positive regulation of membrane permeability	GO	1 out of 6	0.730667	downregulated	1	1.17125	0.31									upregulated	1	2.77282	0.0625	upregulated	1	0.253173	0.7763	upregulated	1	0.617725	0.5392
polyol transport	GO	1 out of 6	0.712714	upregulated	3	5.1678	0.0057					downregulated	1	3.51201	0.0298					upregulated	1	0.943073	0.3894
response to platelet-derived growth factor	GO	3 out of 6	0.709988					upregulated	1	1.64601	0.1928	upregulated	1	2.9378	0.053	downregulated	2	1.92671	0.1456	upregulated	4	5.09864	0.0061	downregulated	2	3.15153	0.0428
striated muscle contraction	GO	3 out of 6	0.707137	upregulated	6	6.01392	0.0024	downregulated	4	4.98287	0.0069	upregulated	5	1.79333	0.1664	upregulated	2	2.73042	0.0652	upregulated	8	3.16242	0.0423	upregulated	4	4.84766	0.0078
positive regulation of cardiac muscle cell differentiation	GO	3 out of 6	0.706573	upregulated	2	4.21007	0.0148					downregulated	2	3.98046	0.0187	downregulated	2	3.12591	0.0439	downregulated	1	0.856127	0.4248	downregulated	1	2.74675	0.0641
cellular response to platelet-derived growth factor stimulus	GO	3 out of 6	0.697475					upregulated	1	1.68599	0.1853	upregulated	1	2.98312	0.0506	downregulated	2	1.96977	0.1395	upregulated	3	5.1951	0.0055	downregulated	2	3.19324	0.041
protein disulfide oxidoreductase activity	GO	2 out of 6	0.683867									upregulated	1	0.860062	0.4231					downregulated	2	2.13998	0.1177	upregulated	2	2.31618	0.0986
polysaccharide metabolic process	GO	1 out of 6	0.674071	upregulated	2	1.0038	0.3665	downregulated	2	1.11472	0.328	upregulated	3	2.40883	0.0899	downregulated	7	5.14756	0.0058	upregulated	5	1.9354	0.1444	downregulated	3	2.60947	0.0736
positive regulation of mitochondrial membrane permeability	GO	1 out of 6	0.663789	downregulated	1	1.20197	0.3006									upregulated	1	2.80872	0.0603	upregulated	1	0.28187	0.7544	upregulated	1	0.661084	0.5163
protein transporter activity	GO	4 out of 6	0.659137	upregulated	6	1.10046	0.3327	upregulated	4	2.02161	0.1324	downregulated	3	7.65195	0.0005	downregulated	3	1.35362	0.2583	downregulated	5	4.39081	0.0124	downregulated	2	2.15183	0.1163
negative regulation of substrate adhesion-dependent cell spreading	GO	2 out of 6	0.656747	downregulated	1	1.84209	0.1585					upregulated	2	3.8713	0.0208	downregulated	1	1.16316	0.3125	upregulated	1	2.64777	0.0708	downregulated	1	2.43847	0.0873
lipid catabolic process	GO	3 out of 6	0.638388	downregulated	4	3.89207	0.0204	upregulated	14	4.60687	0.01	downregulated	16	5.72851	0.0033	downregulated	11	2.7245	0.0656	downregulated	13	4.65708	0.0095	downregulated	6	3.71952	0.0242
mitochondrial tRNA processing	GO	1 out of 6	0.626131					upregulated	1	1.94202	0.1434					downregulated	1	1.31589	0.2682
DNA catabolic process	GO	1 out of 6	0.624885	upregulated	1	0.258468	0.7722	upregulated	2	3.58979	0.0276	downregulated	3	1.01607	0.362	downregulated	1	0.427207	0.6523	downregulated	1	1.44048	0.2368	upregulated	1	0.815597	0.4424
positive regulation of sodium ion transmembrane transport	GO	2 out of 6	0.618913	upregulated	1	0.934262	0.3929					upregulated	1	2.24664	0.1058	downregulated	1	0.761699	0.4669	upregulated	1	0.800329	0.4492	upregulated	1	0.99996	0.3679
protein localization to lysosome	GO	3 out of 6	0.602114	upregulated	3	3.7252	0.0241	upregulated	2	2.96117	0.0518	downregulated	4	2.90865	0.0545	downregulated	3	3.11913	0.0442	downregulated	2	2.08925	0.1238	upregulated	2	2.14573	0.117
mitochondrial outer membrane permeabilization involved in programmed cell death	GO	1 out of 6	0.599296	downregulated	1	1.30306	0.2717									upregulated	1	2.92543	0.0536	upregulated	1	0.314361	0.7303	upregulated	1	0.70871	0.4923
interleukin-6 production	GO	2 out of 6	0.598944					upregulated	1	1.47968	0.2277	downregulated	1	1.16818	0.3109					upregulated	1	1.7078	0.1813	downregulated	1	1.99524	0.136
cerebellar Purkinje cell layer development	GO	2 out of 6	0.591776									downregulated	3	2.66928	0.0693					downregulated	2	1.92231	0.1463	downregulated	1	1.33875	0.2622
cell division	GO	3 out of 6	0.584729	upregulated	32	3.34462	0.0353	upregulated	36	13.4795	1.4e-06	downregulated	54	12.5853	3.4e-06	downregulated	26	3.62799	0.0266	upregulated	34	1.87329	0.1536	downregulated	8	1.84722	0.1577
anion transmembrane transport	GO	2 out of 6	0.566099	upregulated	16	5.03261	0.0065	upregulated	7	0.966879	0.3803	upregulated	8	6.2706	0.0019	downregulated	17	6.12541	0.0022	upregulated	15	2.88449	0.0559	upregulated	9	1.72721	0.1778
class I DNA-(apurinic or apyrimidinic site) endonuclease activity	GO	2 out of 6	0.563442	upregulated	1	1.23163	0.2918													downregulated	1	1.96824	0.1397	upregulated	1	2.63643	0.0716
interleukin-2 production	GO	1 out of 6	0.556446																	downregulated	1	1.73015	0.1773	upregulated	1	1.1737	0.3092
lipid modification	GO	4 out of 6	0.556391	upregulated	12	0.703844	0.4947	upregulated	13	2.9249	0.0537	downregulated	20	6.50278	0.0015	downregulated	11	2.94954	0.0524	downregulated	12	3.62224	0.0267	downregulated	6	2.75772	0.0634
transcription factor TFIID complex	GO	1 out of 6	0.519069	upregulated	3	2.24306	0.1061	upregulated	2	3.26491	0.0382	upregulated	1	0.778685	0.459	upregulated	1	4.52408	0.0108	upregulated	2	1.1344	0.3216	downregulated	1	1.65347	0.1914
exploration behavior	GO	2 out of 6	0.507487	upregulated	1	2.32704	0.0976	upregulated	1	0.607549	0.5447									upregulated	3	1.63138	0.1957	upregulated	1	0.795727	0.4513
metencephalon development	GO	3 out of 6	0.483492	upregulated	4	2.29332	0.1009	upregulated	5	2.29257	0.101	downregulated	8	3.25999	0.0384	downregulated	2	0.298959	0.7416	upregulated	7	1.51399	0.22	downregulated	2	0.970545	0.3789
histone H3-K4 trimethylation	GO	3 out of 6	0.48113	upregulated	1	0.707958	0.4926	upregulated	1	0.678656	0.5073	downregulated	1	0.497772	0.6079	downregulated	1	0.940783	0.3903	downregulated	1	1.67051	0.1882	upregulated	1	1.13744	0.3206
positive regulation of sodium ion transmembrane transporter activity	GO	2 out of 6	0.471235	upregulated	1	1.19539	0.3026					upregulated	1	2.56391	0.077	downregulated	1	1.01348	0.363	upregulated	1	1.02991	0.357	upregulated	1	1.24468	0.288
biomineral tissue development	GO	3 out of 6	0.460643	downregulated	3	1.59776	0.2024	upregulated	2	0.805108	0.447	downregulated	5	4.0446	0.0175	downregulated	1	1.39182	0.2486	downregulated	4	3.0962	0.0452	downregulated	3	3.59351	0.0275
Seh1-associated complex	GO	1 out of 6	0.444856	upregulated	1	2.05909	0.1276									downregulated	1	0.842295	0.4307	upregulated	1	0.771941	0.4621
vesicle organization	GO	3 out of 6	0.443563	upregulated	14	3.05366	0.0472	upregulated	16	3.54275	0.0289	upregulated	10	1.51831	0.2191	downregulated	16	2.98513	0.0505	upregulated	16	3.04393	0.0476	upregulated	11	1.6421	0.1936
positive regulation of mitochondrial membrane permeability involved in apoptotic process	GO	1 out of 6	0.432996	downregulated	1	1.48679	0.2261									upregulated	1	3.13284	0.0436	upregulated	1	0.393494	0.6747	upregulated	1	0.819557	0.4406
extrinsic component of organelle membrane	GO	3 out of 6	0.384939	upregulated	2	0.757129	0.469	downregulated	1	0.636359	0.5292	upregulated	2	1.44926	0.2347	downregulated	3	2.02804	0.1316	downregulated	2	1.69611	0.1834	upregulated	1	0.853163	0.4261
cyclin-dependent protein serine/threonine kinase regulator activity	GO	1 out of 6	0.370878	downregulated	1	0.748042	0.4733	upregulated	3	4.92517	0.0073	upregulated	3	2.72832	0.0653	downregulated	1	1.62845	0.1962	upregulated	4	2.1778	0.1133
structural constituent of eye lens	GO	1 out of 6	0.357529									downregulated	1	2.09496	0.1231	upregulated	1	2.03509	0.1307	upregulated	1	1.12612	0.3243	downregulated	1	1.48365	0.2268
positive regulation of DNA biosynthetic process	GO	3 out of 6	0.354056	upregulated	5	3.7321	0.0239	upregulated	4	3.25197	0.0387	downregulated	7	7.09925	0.0008	downregulated	5	5.32335	0.0049	downregulated	8	8.50331	0.0002	downregulated	1	0.541249	0.582
endopeptidase inhibitor activity	GO	1 out of 6	0.344897	downregulated	5	2.58538	0.0754	upregulated	4	2.42099	0.0888	upregulated	3	1.21764	0.2959	upregulated	2	2.30024	0.1002	downregulated	3	2.54871	0.0782	upregulated	3	2.20381	0.1104
regulation of skeletal muscle cell differentiation	GO	1 out of 6	0.335007	upregulated	3	4.1564	0.0157	downregulated	1	1.48715	0.226	downregulated	2	2.33424	0.0969
regulation of mitotic spindle assembly	GO	2 out of 6	0.334772	upregulated	3	2.18253	0.1128	downregulated	1	1.677	0.1869	downregulated	2	0.968626	0.3796	downregulated	1	0.629671	0.5328	upregulated	3	2.06961	0.1262	downregulated	2	3.49714	0.0303
chemokine binding	GO	1 out of 6	0.330571	downregulated	1	1.50998	0.2209	upregulated	1	3.5665	0.0283	downregulated	2	0.966245	0.3805					upregulated	2	0.759706	0.4678
ATP-dependent microtubule motor activity, plus-end-directed	GO	1 out of 6	0.318182					upregulated	1	1.74748	0.1742	downregulated	2	0.719213	0.4871	downregulated	1	0.710085	0.4916
photoreceptor cell outer segment organization	GO	2 out of 6	0.316365	upregulated	1	1.64442	0.1931	downregulated	1	2.97417	0.0511	upregulated	1	1.64612	0.1928
lipid storage	GO	3 out of 6	0.293151	upregulated	1	1.6055	0.2008	upregulated	3	2.79227	0.0613	upregulated	1	2.14879	0.1166	downregulated	2	1.68887	0.1847	upregulated	4	3.21282	0.0402	upregulated	1	1.35172	0.2588
response to thyroid hormone	GO	3 out of 6	0.292953					upregulated	2	2.17096	0.1141	upregulated	2	3.18665	0.0413	downregulated	3	4.45979	0.0116	downregulated	1	1.25932	0.2838	upregulated	1	1.86418	0.155
protein self-association	GO	2 out of 6	0.280259	upregulated	3	1.46104	0.232	upregulated	3	6.38657	0.0017	downregulated	3	2.80372	0.0606	downregulated	2	1.8316	0.1602	upregulated	6	2.13825	0.1179	upregulated	2	0.79378	0.4521
carbohydrate transport	GO	3 out of 6	0.274046	upregulated	3	1.61964	0.198	downregulated	2	1.63165	0.1956	downregulated	3	3.01104	0.0492	downregulated	4	5.26983	0.0051	downregulated	3	5.99492	0.0025	downregulated	2	2.57201	0.0764
positive regulation of blood pressure	GO	3 out of 6	0.223449					downregulated	1	1.91331	0.1476	upregulated	2	1.73169	0.177	upregulated	1	1.84433	0.1581	downregulated	1	1.75029	0.1737	upregulated	2	3.18954	0.0412
cell aggregation	GO	1 out of 6	0.219763	downregulated	1	1.15639	0.3146	upregulated	1	2.90243	0.0549	downregulated	1	0.2196	0.8028					upregulated	3	1.30668	0.2707
oxidoreductase activity, acting on the CH-NH group of donors	GO	3 out of 6	0.214365	downregulated	3	4.09535	0.0166	upregulated	1	1.50328	0.2224	upregulated	2	3.40491	0.0332	upregulated	1	1.9565	0.1414	upregulated	2	1.85187	0.1569	upregulated	1	0.703098	0.495
positive regulation of cellular protein localization	GO	2 out of 6	0.186645	downregulated	8	0.979261	0.3756	downregulated	6	2.18337	0.1127	downregulated	25	3.30077	0.0369	downregulated	15	3.09195	0.0454	downregulated	23	7.75278	0.0004	downregulated	8	1.98921	0.1368
demethylase activity	GO	2 out of 6	0.178663	downregulated	1	1.24092	0.2891	downregulated	1	1.2007	0.301	upregulated	1	1.25235	0.2858	upregulated	2	4.37885	0.0125	upregulated	5	2.01685	0.1331	upregulated	2	0.994052	0.3701
regulation of heart contraction	GO	2 out of 6	0.171512	downregulated	3	1.68786	0.1849	upregulated	6	4.08454	0.0168	downregulated	13	1.26253	0.2829	upregulated	3	1.33202	0.2639	upregulated	13	3.43325	0.0323	upregulated	8	2.29465	0.1008
negative regulation of extrinsic apoptotic signaling pathway via death domain receptors	GO	1 out of 6	0.169702					upregulated	2	5.3726	0.0046	downregulated	3	1.58553	0.2048	downregulated	2	1.73412	0.1766	upregulated	2	1.071	0.3427	upregulated	2	0.812246	0.4439
modification of morphology or physiology of other organism	GO	2 out of 6	0.14861	downregulated	4	2.10987	0.1213	upregulated	5	3.7707	0.023	downregulated	5	0.920971	0.3981	downregulated	2	0.232238	0.7928	upregulated	9	2.15014	0.1165	downregulated	3	1.79114	0.1668
autophagosome maturation	GO	3 out of 6	0.140592	upregulated	2	1.68511	0.1854	upregulated	2	1.67008	0.1882	downregulated	2	3.14007	0.0433	downregulated	2	3.00353	0.0496	downregulated	3	3.59588	0.0274	upregulated	1	0.666873	0.5133
hydrolase activity, acting on carbon-nitrogen (but not peptide) bonds, in linear amides	GO	2 out of 6	0.137079	upregulated	7	5.77389	0.0031	upregulated	5	4.08775	0.0168	downregulated	9	3.74054	0.0237	downregulated	4	2.18265	0.1127	upregulated	8	3.32169	0.0361	upregulated	5	2.66233	0.0698
negative regulation of viral process	GO	1 out of 6	0.135036	downregulated	4	1.82683	0.1609	upregulated	7	6.86903	0.001	upregulated	1	0.483068	0.6169	downregulated	1	0.285614	0.7516	upregulated	5	2.6586	0.07	upregulated	5	1.96296	0.1404
response to fibroblast growth factor	GO	3 out of 6	0.135017	upregulated	9	4.48413	0.0113	upregulated	5	1.47745	0.2282	upregulated	7	4.07059	0.0171	downregulated	4	2.74357	0.0643	upregulated	8	3.3661	0.0345	upregulated	4	3.78748	0.0227
seminiferous tubule development	GO	3 out of 6	0.123306	upregulated	1	0.929689	0.3947	upregulated	1	1.01889	0.361	upregulated	1	1.46894	0.2302	downregulated	1	1.16891	0.3107	upregulated	1	0.819232	0.4408	upregulated	1	1.30608	0.2709
multicellular organismal movement	GO	3 out of 6	0.103096	downregulated	3	5.28185	0.0051	downregulated	1	1.22866	0.2927	upregulated	2	2.08713	0.124	upregulated	2	4.5843	0.0102	downregulated	1	0.572352	0.5642	upregulated	1	0.630172	0.5325
musculoskeletal movement	GO	3 out of 6	0.103096	downregulated	3	5.28185	0.0051	downregulated	1	1.22866	0.2927	upregulated	2	2.08713	0.124	upregulated	2	4.5843	0.0102	downregulated	1	0.572352	0.5642	upregulated	1	0.630172	0.5325
regulation of cellular protein localization	GO	3 out of 6	0.100075	upregulated	23	0.949873	0.3868	downregulated	11	3.51863	0.0296	upregulated	14	1.95829	0.1411	downregulated	21	2.26277	0.1041	downregulated	29	5.56024	0.0038	upregulated	23	2.58693	0.0753
regulation of muscle contraction	GO	3 out of 6	0.0985721	downregulated	3	3.60728	0.0271	upregulated	5	2.87198	0.0566	downregulated	11	4.58511	0.0102	downregulated	6	3.60449	0.0272	downregulated	7	6.25641	0.0019	downregulated	4	2.76706	0.0628
muscle cell differentiation	GO	3 out of 6	0.0814832	upregulated	13	5.45937	0.0043	upregulated	7	2.13058	0.1188	downregulated	18	3.07477	0.0462	upregulated	5	4.27192	0.014	upregulated	19	5.31641	0.0049	upregulated	10	3.38922	0.0337
interferon-gamma production	GO	1 out of 6	0.0775803					upregulated	1	1.14723	0.3175													upregulated	1	1.06965	0.3431
retina vasculature development in camera-type eye	GO	2 out of 6	0.0559044	downregulated	1	2.45893	0.0855	upregulated	1	1.30981	0.2699	upregulated	2	3.40423	0.0332					upregulated	3	2.19921	0.1109
cytoplasmic sequestering of protein	GO	2 out of 6	0.0473352	upregulated	1	1.18161	0.3068	downregulated	1	1.71129	0.1806	upregulated	3	4.06516	0.0172	downregulated	1	1.0561	0.3478	upregulated	2	2.43205	0.0879
calcineurin-mediated signaling	GO	1 out of 6	0.031017	downregulated	1	1.58623	0.2047					upregulated	1	2.95299	0.0522	downregulated	1	1.33574	0.263
homologous recombination	GO	3 out of 6	0.0164245	upregulated	2	0.951561	0.3861	upregulated	3	1.79158	0.1667	downregulated	2	1.34121	0.2615	downregulated	2	2.36823	0.0936	upregulated	4	2.90101	0.055	downregulated	2	3.88374	0.0206
reciprocal meiotic recombination	GO	3 out of 6	0.0164245	upregulated	2	0.951561	0.3861	upregulated	3	1.79158	0.1667	downregulated	2	1.34121	0.2615	downregulated	2	2.36823	0.0936	upregulated	4	2.90101	0.055	downregulated	2	3.88374	0.0206
