# Supplementary material for: Physical Activity Rewires the Human Brain against Neurodegeneration
Source: Int J Mol Sci. 2022 Jun 2;23(11):6223. doi: 10.3390/ijms23116223 (PMC9181322; doi:10.3390/ijms23116223)
Supplement: Supplementary file 1 [file ijms-23-06223-s001.zip › Table S11.xlsx]

## Sheet: Sheet1
Table S11. Functional analysis of genes downregulated in physically active subjects and upregulated in Frontotemporal dementia datasets
Bioset 1: Hippocampi from 76-99yr old female subjects with high physical activity levels _vs_ low (Study: Hippocampi from post-mortem brains of subjects with low, moderate, or high physical activity levels)
Bioset 2: Hippocampi from 76-99yr old female subjects with moderate physical activity levels _vs_ low (Study: Hippocampi from post-mortem brains of subjects with low, moderate, or high physical activity levels)
Bioset 3: Hippocampi from 78-101yr old male subjects with high physical activity levels _vs_ low (Study: Hippocampi from post-mortem brains of subjects with low, moderate, or high physical activity levels)
Bioset 4: Hippocampi from 78-101yr old male subjects with moderate physical activity levels _vs_ low (Study: Hippocampi from post-mortem brains of subjects with low, moderate, or high physical activity levels)
Bioset 5: Hippocampi - FTLD-U patients with GRN mutations _vs_ normal subjects (Study: Frontal cortices, hippocampi and cerebella of patients with frontotemporal lobar degeneration)
Bioset 6: Hippocampi - FTLD-U patients without GRN mutations _vs_ normal subjects (Study: Frontal cortices, hippocampi and cerebella of patients with frontotemporal lobar degeneration)
Biogroup	Source	Specificity	Overall Biogroup score	Correlated direction - Bioset 1	Common genes - Bioset 1	Score - Bioset 1	p-value - Bioset 1	Correlated direction - Bioset 2	Common genes - Bioset 2	Score - Bioset 2	p-value - Bioset 2	Correlated direction - Bioset 3	Common genes - Bioset 3	Score - Bioset 3	p-value - Bioset 3	Correlated direction - Bioset 4	Common genes - Bioset 4	Score - Bioset 4	p-value - Bioset 4	Correlated direction - Bioset 5	Common genes - Bioset 5	Score - Bioset 5	p-value - Bioset 5	Correlated direction - Bioset 6	Common genes - Bioset 6	Score - Bioset 6	p-value - Bioset 6
leukocyte degranulation	GO	4 out of 6	88.9032	downregulated	6	0.519363	0.5949	upregulated	25	4.61489	0.0099	downregulated	59	30.4946	5.7e-14	downregulated	60	66.9198	8.7e-30	downregulated	23	5.5074	0.0041	upregulated	15	1.09171	0.3356
regulation of cell morphogenesis	GO	6 out of 6	58.426	downregulated	15	7.30153	0.0007	downregulated	6	1.44267	0.2363	downregulated	62	25.4796	8.6e-12	downregulated	36	16.2531	8.7e-08	upregulated	39	4.13638	0.016	upregulated	22	3.8127	0.0221
negative regulation of neurogenesis	GO	5 out of 6	57.2522	downregulated	11	4.18434	0.0152	upregulated	8	4.65412	0.0095	downregulated	37	25.6023	7.6e-12	downregulated	24	8.63094	0.0002	upregulated	32	10.1931	3.7e-05	upregulated	21	13.2957	1.7e-06
ensheathment of neurons	GO	5 out of 6	56.0494	upregulated	1	2.57059	0.0765	downregulated	3	2.22616	0.1079	downregulated	26	34.0671	1.6e-15	downregulated	11	10.836	2e-05	upregulated	8	5.22933	0.0054	upregulated	8	6.26134	0.0019
axon ensheathment	GO	5 out of 6	56.0494	upregulated	1	2.57059	0.0765	downregulated	3	2.22616	0.1079	downregulated	26	34.0671	1.6e-15	downregulated	11	10.836	2e-05	upregulated	8	5.22933	0.0054	upregulated	8	6.26134	0.0019
glial cell differentiation	GO	5 out of 6	55.8108	downregulated	4	1.42211	0.2412	upregulated	4	1.31221	0.2692	downregulated	31	31.9491	1.3e-14	downregulated	10	3.89301	0.0204	upregulated	18	8.31334	0.0002	upregulated	15	11.5454	9.7e-06
inflammatory response	GO	4 out of 6	55.2064	downregulated	14	2.78345	0.0618	upregulated	9	3.8379	0.0215	downregulated	46	19.6906	2.8e-09	downregulated	33	37.1568	7.3e-17	upregulated	22	2.13592	0.1181	downregulated	7	2.72254	0.0657
myelination	GO	4 out of 6	54.2506	upregulated	1	2.61705	0.073	upregulated	2	0.881783	0.414	downregulated	26	34.7313	8.2e-16	downregulated	11	11.1437	1.4e-05	upregulated	8	5.3818	0.0046	upregulated	8	6.49269	0.0015
gliogenesis	GO	5 out of 6	51.4672	downregulated	4	1.24104	0.2891	upregulated	6	4.37552	0.0126	downregulated	34	29.1351	2.2e-13	downregulated	12	3.3522	0.035	upregulated	23	8.77808	0.0002	upregulated	19	13.3363	1.6e-06
blood vessel morphogenesis	GO	5 out of 6	49.8941	downregulated	13	2.4238	0.0886	upregulated	13	3.48882	0.0305	downregulated	45	19.0097	5.5e-09	downregulated	28	9.91303	5e-05	upregulated	41	12.4897	3.8e-06	upregulated	22	9.54665	7.1e-05
positive regulation of leukocyte cell-cell adhesion	GO	6 out of 6	48.5601	downregulated	8	1.95585	0.1414	downregulated	4	3.76929	0.0231	downregulated	26	14.514	5e-07	downregulated	20	23.9426	4e-11	upregulated	16	3.12253	0.044	upregulated	8	1.25583	0.2848
endosome membrane	GO	4 out of 6	46.1778	upregulated	21	3.85013	0.0213	upregulated	22	4.64633	0.0096	downregulated	51	22.6876	1.4e-10	downregulated	44	24.4488	2.4e-11	upregulated	27	2.58254	0.0756	upregulated	21	4.95538	0.007
lymphocyte activation	GO	5 out of 6	45.6405	downregulated	13	2.24178	0.1063	upregulated	7	1.96475	0.1402	downregulated	40	20.7237	1e-09	downregulated	29	19.4164	3.7e-09	upregulated	23	1.37615	0.2525	upregulated	11	3.8472	0.0213
cell leading edge	GO	6 out of 6	45.4439	downregulated	13	3.7926	0.0225	downregulated	10	1.72074	0.1789	downregulated	43	8.58684	0.0002	downregulated	28	9.65505	6.4e-05	upregulated	47	16.6304	6e-08	upregulated	20	5.05827	0.0064
receptor complex	GO	4 out of 6	43.2414	upregulated	20	5.30089	0.005	upregulated	7	3.4619	0.0314	downregulated	37	18.6737	7.8e-09	downregulated	26	21.7876	3.4e-10	upregulated	27	4.70789	0.009	upregulated	18	6.83493	0.0011
cardiovascular system development	GO	5 out of 6	43.1068	downregulated	17	2.50308	0.0818	upregulated	16	2.65822	0.0701	downregulated	50	14.6237	4.5e-07	downregulated	32	8.42516	0.0002	upregulated	52	10.9113	1.8e-05	upregulated	27	9.3018	9.1e-05
regulation of lymphocyte activation	GO	5 out of 6	42.5292	upregulated	7	1.42777	0.2398	downregulated	6	2.22099	0.1085	downregulated	46	16.7567	5.3e-08	downregulated	28	18.5696	8.6e-09	upregulated	28	1.91871	0.1468	upregulated	16	4.49091	0.0112
peptide antigen binding	GO	3 out of 6	40.3938	upregulated	1	6.57729	0.0014	upregulated	1	0.809985	0.4449	downregulated	9	21.5123	4.5e-10	downregulated	7	26.2539	4e-12	downregulated	1	0.450588	0.6373	upregulated	1	0.465465	0.6278
glial cell development	GO	4 out of 6	39.7669	upregulated	1	0.272221	0.7617	upregulated	2	1.61026	0.1998	downregulated	19	25.3073	1e-11	downregulated	8	4.94178	0.0071	upregulated	10	5.33977	0.0048	upregulated	9	6.06052	0.0023
antigen processing and presentation of exogenous antigen	GO	4 out of 6	38.3991	upregulated	4	5.16823	0.0057	upregulated	8	2.15336	0.1161	downregulated	20	21.016	7.5e-10	downregulated	18	22.8964	1.1e-10	upregulated	2	1.0287	0.3575	upregulated	4	0.779706	0.4585
regulation of gliogenesis	GO	5 out of 6	37.7374	downregulated	2	1.58668	0.2046	upregulated	6	6.20511	0.002	downregulated	18	18.8089	6.8e-09	downregulated	10	6.02152	0.0024	upregulated	12	7.02674	0.0009	upregulated	11	10.4986	2.8e-05
stress response to copper ion	GO	3 out of 6	37.698													downregulated	1	2.51399	0.0809	upregulated	7	26.2048	4.2e-12	upregulated	3	8.97924	0.0001
SH3 domain binding	GO	6 out of 6	37.515	downregulated	7	5.09353	0.0061	downregulated	2	0.326291	0.7216	downregulated	16	9.53252	7.2e-05	downregulated	8	4.70227	0.0091	upregulated	14	8.77097	0.0002	upregulated	9	9.08943	0.0001
membrane microdomain	GO	4 out of 6	35.9068	upregulated	7	2.6531	0.0704	upregulated	8	6.66245	0.0013	downregulated	30	14.075	7.7e-07	downregulated	29	19.2831	4.2e-09	upregulated	25	8.59082	0.0002	upregulated	14	3.27349	0.0379
membrane raft	GO	4 out of 6	35.9068	upregulated	7	2.6531	0.0704	upregulated	8	6.66245	0.0013	downregulated	30	14.075	7.7e-07	downregulated	29	19.2831	4.2e-09	upregulated	25	8.59082	0.0002	upregulated	14	3.27349	0.0379
organic hydroxy compound metabolic process	GO	5 out of 6	35.3296	downregulated	9	3.36714	0.0345	upregulated	15	4.08788	0.0168	downregulated	31	11.2645	1.3e-05	downregulated	27	13.961	8.6e-07	upregulated	32	5.23438	0.0053	upregulated	18	5.59049	0.0037
antigen processing and presentation of peptide antigen	GO	3 out of 6	35.299	upregulated	4	5.04156	0.0065	upregulated	9	2.26451	0.1039	downregulated	20	20.3684	1.4e-09	downregulated	18	22.6633	1.4e-10	downregulated	4	1.12151	0.3258	upregulated	4	0.694994	0.4991
regulation of adherens junction organization	GO	6 out of 6	35.1748	downregulated	2	2.89262	0.0554	downregulated	1	1.24374	0.2883	downregulated	9	5.79485	0.003	downregulated	6	3.52376	0.0295	upregulated	12	13.9337	8.9e-07	upregulated	7	7.7861	0.0004
transcriptional repressor activity, RNA polymerase II transcription regulatory region sequence-specific DNA binding	GO	6 out of 6	35.1286	downregulated	7	0.563373	0.5693	downregulated	12	8.55513	0.0002	downregulated	22	2.78566	0.0617	downregulated	19	4.47884	0.0113	upregulated	29	10.2605	3.5e-05	upregulated	16	8.48511	0.0002
lamellipodium	GO	5 out of 6	34.6125	downregulated	7	4.67668	0.0093	upregulated	8	1.45963	0.2323	downregulated	19	2.9251	0.0537	downregulated	16	7.84176	0.0004	upregulated	30	17.1298	3.6e-08	upregulated	11	3.49881	0.0302
peptide binding	GO	3 out of 6	34.3293	upregulated	10	5.09996	0.0061	upregulated	9	1.7587	0.1723	downregulated	25	18.3452	1.1e-08	downregulated	23	24.2455	3e-11	downregulated	11	3.18711	0.0413	upregulated	8	1.78442	0.1679
regulation of small GTPase mediated signal transduction	GO	5 out of 6	34.0922	upregulated	23	5.74718	0.0032	downregulated	9	4.33137	0.0131	downregulated	41	9.98093	4.6e-05	downregulated	24	7.73186	0.0004	upregulated	36	10.3507	3.2e-05	upregulated	20	7.44443	0.0006
negative regulation of growth	GO	5 out of 6	34.0792	downregulated	9	2.17313	0.1138	downregulated	4	3.71128	0.0244	downregulated	26	9.01304	0.0001	upregulated	5	3.10272	0.0449	upregulated	29	11.6977	8.3e-06	upregulated	16	10.5868	2.5e-05
regulation of cell junction assembly	GO	5 out of 6	33.9125	downregulated	2	2.4352	0.0876	upregulated	4	1.57022	0.208	downregulated	13	8.44395	0.0002	downregulated	8	4.14315	0.0159	upregulated	14	12.8657	2.6e-06	upregulated	8	7.59469	0.0005
regulation of axonogenesis	GO	5 out of 6	33.9017	downregulated	6	6.40808	0.0016	upregulated	5	0.848376	0.4281	downregulated	22	13.4123	1.5e-06	downregulated	14	5.77679	0.0031	upregulated	18	5.58748	0.0037	upregulated	9	3.56538	0.0283
myeloid cell differentiation	GO	6 out of 6	32.9435	downregulated	6	4.02173	0.0179	downregulated	2	3.79939	0.0224	downregulated	23	10.435	2.9e-05	downregulated	15	10.2073	3.7e-05	upregulated	12	2.17072	0.1141	upregulated	8	2.30938	0.0993
antigen processing and presentation	GO	3 out of 6	32.9433	upregulated	6	4.88943	0.0075	upregulated	10	2.1832	0.1127	downregulated	22	18.9009	6.2e-09	downregulated	19	21.3725	5.2e-10	downregulated	4	0.856444	0.4247	upregulated	4	0.599013	0.5494
mRNA transport	GO	5 out of 6	31.8823	downregulated	3	0.600833	0.5484	upregulated	7	1.83346	0.1599	downregulated	17	6.14146	0.0022	downregulated	14	8.99645	0.0001	upregulated	21	10.5991	2.5e-05	upregulated	12	7.37786	0.0006
extracellular structure organization	GO	5 out of 6	30.9519	downregulated	10	1.33889	0.2621	upregulated	10	1.65765	0.1906	downregulated	28	5.65973	0.0035	downregulated	18	9.22855	9.8e-05	upregulated	29	9.93353	4.9e-05	upregulated	16	6.44882	0.0016
regulation of peptidyl-tyrosine phosphorylation	GO	5 out of 6	30.7265	downregulated	5	1.45844	0.2326	upregulated	8	1.47955	0.2277	downregulated	20	9.36801	8.5e-05	downregulated	21	14.8109	3.7e-07	upregulated	14	4.30075	0.0136	upregulated	9	2.26796	0.1035
negative regulation of cell adhesion	GO	4 out of 6	30.6755	upregulated	10	1.81926	0.1621	upregulated	10	0.967878	0.3799	downregulated	28	11.3657	1.2e-05	downregulated	12	4.54777	0.0106	upregulated	25	9.51108	7.4e-05	upregulated	14	8.03808	0.0003
positive regulation of substrate adhesion-dependent cell spreading	GO	5 out of 6	30.5561	downregulated	4	6.56113	0.0014	downregulated	1	3.847	0.0213	downregulated	10	15.5946	1.7e-07	downregulated	4	5.62161	0.0036	downregulated	1	1.98242	0.1377	upregulated	2	0.914249	0.4008
macrophage activation	GO	5 out of 6	30.4801	downregulated	1	0.711751	0.4908	upregulated	4	10.9457	1.8e-05	downregulated	6	8.34635	0.0002	downregulated	9	26.4771	3.2e-12	upregulated	3	2.03068	0.1312	upregulated	3	3.85985	0.0211
regulation of ossification	GO	4 out of 6	30.297	upregulated	7	1.5203	0.2186	upregulated	6	2.00464	0.1347	downregulated	12	3.49245	0.0304	downregulated	7	1.86599	0.1547	upregulated	23	11.131	1.5e-05	upregulated	16	15.3279	2.2e-07
regulation of substrate adhesion-dependent cell spreading	GO	4 out of 6	30.2628	downregulated	5	7.27091	0.0007	downregulated	1	3.46815	0.0312	downregulated	13	16.3212	8.2e-08	downregulated	6	5.90183	0.0027	downregulated	1	1.55325	0.2116	downregulated	1	1.14602	0.3179
neuroblast proliferation	GO	5 out of 6	30.214					downregulated	1	1.27517	0.2794	downregulated	6	8.01168	0.0003	downregulated	5	9.03095	0.0001	upregulated	2	5.94808	0.0026	upregulated	3	5.94808	0.0026
specific granule membrane	GO	3 out of 6	30.075	downregulated	2	0.527553	0.59	upregulated	4	1.37002	0.2541	downregulated	15	17.0794	3.8e-08	downregulated	14	17.5727	2.3e-08	downregulated	2	2.22909	0.1076	downregulated	2	1.50559	0.2219
T cell activation	GO	5 out of 6	30.0732	downregulated	7	2.3075	0.0995	upregulated	5	2.85715	0.0574	downregulated	25	13.8299	9.9e-07	downregulated	17	13.2904	1.7e-06	upregulated	13	1.35841	0.2571	upregulated	5	2.1441	0.1172
membrane invagination	GO	6 out of 6	29.5538	downregulated	5	4.58101	0.0102	downregulated	1	3.31728	0.0363	downregulated	10	5.34294	0.0048	downregulated	9	9.81946	5.4e-05	upregulated	4	4.39637	0.0123	upregulated	2	2.09672	0.1229
establishment or maintenance of cell polarity	GO	5 out of 6	29.5333	upregulated	7	1.95547	0.1415	downregulated	4	2.31466	0.0988	downregulated	26	12.4091	4.1e-06	downregulated	14	5.39172	0.0046	upregulated	20	6.47551	0.0015	upregulated	11	4.89776	0.0075
establishment of RNA localization	GO	5 out of 6	29.226	downregulated	3	0.370595	0.6903	upregulated	9	2.25228	0.1052	downregulated	20	7.38178	0.0006	downregulated	16	10.0458	4.3e-05	upregulated	21	7.92865	0.0004	upregulated	12	5.75142	0.0032
nucleobase-containing compound transport	GO	5 out of 6	28.9435	downregulated	5	0.785079	0.4561	upregulated	10	2.73408	0.065	downregulated	23	7.31959	0.0007	downregulated	18	9.13209	0.0001	upregulated	25	8.73741	0.0002	upregulated	13	5.70338	0.0033
glial cell fate commitment	GO	3 out of 6	28.941									downregulated	4	7.6099	0.0005					upregulated	4	12.0924	5.6e-06	upregulated	3	9.23873	9.7e-05
extracellular matrix organization	GO	5 out of 6	28.9065	downregulated	10	1.80122	0.1651	upregulated	7	0.997439	0.3688	downregulated	25	6.751	0.0012	downregulated	16	8.42586	0.0002	upregulated	24	6.20276	0.002	upregulated	15	6.7231	0.0012
phosphatidylinositol binding	GO	5 out of 6	28.091	downregulated	7	3.30963	0.0365	upregulated	5	1.34639	0.2602	downregulated	27	12.805	2.7e-06	downregulated	15	7.97163	0.0003	upregulated	14	2.69415	0.0676	upregulated	9	2.65693	0.0702
stress response to metal ion	GO	3 out of 6	27.814					upregulated	1	4.92988	0.0072	upregulated	1	2.81888	0.0597	downregulated	1	2.32051	0.0982	upregulated	7	24.754	1.8e-11	upregulated	3	8.48819	0.0002
Golgi-associated vesicle membrane	GO	4 out of 6	27.3884	upregulated	5	5.21767	0.0054	downregulated	3	1.64218	0.1936	downregulated	13	15.4247	2e-07	downregulated	11	18.6396	8e-09	downregulated	8	5.41736	0.0044	upregulated	4	2.31698	0.0986
Fc receptor signaling pathway	GO	6 out of 6	27.3559	downregulated	7	2.87816	0.0562	downregulated	1	2.52194	0.0803	downregulated	18	8.22319	0.0003	downregulated	17	10.6847	2.3e-05	upregulated	13	1.54838	0.2126	upregulated	9	1.49956	0.2232
negative regulation of mitotic cell cycle phase transition	GO	4 out of 6	27.3005	upregulated	7	1.3569	0.2575	upregulated	6	1.2668	0.2817	downregulated	23	12.7767	2.8e-06	downregulated	17	9.16475	0.0001	upregulated	18	3.64491	0.0261	upregulated	10	4.3378	0.0131
reproductive structure development	GO	5 out of 6	27.1278	downregulated	13	5.33891	0.0048	upregulated	12	3.56017	0.0284	downregulated	26	4.55242	0.0105	downregulated	26	5.75931	0.0032	upregulated	35	7.57997	0.0005	upregulated	19	7.45736	0.0006
cellular response to nutrient levels	GO	5 out of 6	27.0163	downregulated	4	3.91909	0.0199	upregulated	6	4.29011	0.0137	downregulated	16	3.82422	0.0218	downregulated	14	7.62109	0.0005	upregulated	18	8.82937	0.0001	upregulated	12	7.11265	0.0008
reproductive system development	GO	5 out of 6	26.8879	downregulated	13	5.31019	0.0049	upregulated	12	3.54102	0.029	downregulated	26	4.47979	0.0113	downregulated	26	5.66994	0.0034	upregulated	35	7.54329	0.0005	upregulated	19	7.42572	0.0006
lipid transport	GO	5 out of 6	26.8847	downregulated	7	1.79079	0.1668	upregulated	13	2.4211	0.0888	downregulated	21	6.66698	0.0013	downregulated	15	9.71997	6e-05	upregulated	22	7.5877	0.0005	upregulated	9	3.54042	0.029
regulation of bone remodeling	GO	5 out of 6	26.7442	downregulated	1	0.662282	0.5157					downregulated	6	11.9303	6.6e-06	downregulated	5	9.99446	4.6e-05	upregulated	4	2.62661	0.0723	upregulated	3	1.53048	0.2164
steroid metabolic process	GO	3 out of 6	26.5094	upregulated	5	0.129132	0.8789	upregulated	10	3.94359	0.0194	downregulated	19	9.47326	7.7e-05	downregulated	22	16.7107	5.5e-08	upregulated	21	7.22782	0.0007	downregulated	6	2.8296	0.059
cortical actin cytoskeleton	GO	5 out of 6	26.1959	downregulated	4	4.13828	0.016	upregulated	2	0.488425	0.6136	downregulated	14	10.5079	2.7e-05	downregulated	5	1.60949	0.2	upregulated	10	7.37618	0.0006	upregulated	4	3.05249	0.0472
regulation of vasculature development	GO	4 out of 6	26.0991	downregulated	11	5.26791	0.0052	upregulated	8	4.23607	0.0145	downregulated	29	14.1314	7.3e-07	downregulated	17	11.6943	8.3e-06	upregulated	24	2.28633	0.1016	downregulated	4	3.04479	0.0476
regulation of angiogenesis	GO	4 out of 6	25.9559	downregulated	10	5.93228	0.0027	upregulated	7	4.66838	0.0094	downregulated	26	13.8144	1e-06	downregulated	14	11.9573	6.4e-06	upregulated	23	2.21305	0.1094	downregulated	3	3.29276	0.0372
RNA transport	GO	5 out of 6	25.6429	downregulated	3	0.394156	0.6742	upregulated	9	2.35557	0.0948	downregulated	19	5.52713	0.004	downregulated	15	8.15931	0.0003	upregulated	21	8.07637	0.0003	upregulated	12	5.8415	0.0029
external side of plasma membrane	GO	5 out of 6	25.6221	downregulated	6	1.10836	0.3301	upregulated	7	4.81451	0.0081	downregulated	24	10.8146	2e-05	downregulated	18	11.4965	1e-05	upregulated	22	3.66842	0.0255	upregulated	10	3.34869	0.0351
cellular response to starvation	GO	5 out of 6	25.5659	downregulated	3	4.29671	0.0136	upregulated	4	1.64591	0.1928	downregulated	13	4.57506	0.0103	downregulated	10	6.46741	0.0016	upregulated	13	7.38857	0.0006	upregulated	8	4.48402	0.0113
forebrain development	GO	3 out of 6	25.407	upregulated	15	1.05395	0.3486	upregulated	10	3.83786	0.0215	downregulated	26	8.46669	0.0002	upregulated	8	3.00721	0.0494	upregulated	34	10.1873	3.8e-05	upregulated	26	14.652	4.3e-07
lymphocyte differentiation	GO	5 out of 6	25.1487	downregulated	8	1.59258	0.2034	upregulated	3	2.78424	0.0618	downregulated	27	11.9609	6.4e-06	downregulated	14	8.79026	0.0002	upregulated	15	1.79009	0.1669	upregulated	8	3.7991	0.0224
walking behavior	GO	5 out of 6	25.0172	downregulated	2	4.67176	0.0094					downregulated	4	4.97296	0.0069	downregulated	4	6.18006	0.0021	upregulated	3	3.59887	0.0274	upregulated	2	5.59359	0.0037
leukocyte migration	GO	4 out of 6	24.5959	downregulated	5	0.583517	0.5579	upregulated	13	6.15525	0.0021	downregulated	29	12.3454	4.3e-06	downregulated	19	16.6218	6e-08	upregulated	20	1.91732	0.147	downregulated	5	0.716994	0.4882
cell-cell adhesion	GO	4 out of 6	24.5708	upregulated	17	6.62145	0.0013	upregulated	13	4.48835	0.0112	downregulated	37	19.3749	3.9e-09	downregulated	19	10.4808	2.8e-05	upregulated	26	3.85755	0.0211	upregulated	10	1.96736	0.1398
regulation of cysteine-type endopeptidase activity	GO	5 out of 6	24.1798	downregulated	8	2.25809	0.1045	upregulated	5	3.62011	0.0268	downregulated	22	8.98134	0.0001	downregulated	15	6.2255	0.002	upregulated	18	5.62614	0.0036	upregulated	9	4.70882	0.009
mesenchymal cell development	GO	5 out of 6	23.87	downregulated	4	1.8744	0.1534	upregulated	2	3.72084	0.0242	downregulated	12	11.3768	1.1e-05	downregulated	3	0.992012	0.3708	upregulated	11	7.05491	0.0009	upregulated	7	6.29271	0.0018
neuron fate commitment	GO	6 out of 6	23.6754	downregulated	2	0.845595	0.4293	downregulated	1	3.53305	0.0292	downregulated	7	4.26404	0.0141	downregulated	2	1.53642	0.2152	upregulated	5	4.8398	0.0079	upregulated	5	8.65649	0.0002
cargo receptor activity	GO	6 out of 6	23.3549	downregulated	4	3.67169	0.0254	downregulated	3	2.6106	0.0735	downregulated	9	6.03743	0.0024	downregulated	4	3.32758	0.0359	upregulated	5	4.23802	0.0144	upregulated	4	3.46959	0.0311
regulation of endocytosis	GO	4 out of 6	23.1967	upregulated	12	1.69317	0.1839	upregulated	9	2.87494	0.0564	downregulated	25	9.86619	5.2e-05	downregulated	19	13.3627	1.6e-06	upregulated	18	2.71694	0.0661	upregulated	9	1.81897	0.1622
B cell activation	GO	5 out of 6	23.1932	upregulated	4	1.75978	0.1721	downregulated	1	0.113539	0.8927	downregulated	16	9.88743	5.1e-05	downregulated	13	8.51459	0.0002	upregulated	11	3.83032	0.0217	upregulated	6	2.60706	0.0738
integrin complex	GO	5 out of 6	23.0986	downregulated	2	2.50081	0.082					downregulated	5	8.04886	0.0003	downregulated	5	9.41128	8.2e-05	upregulated	2	0.905668	0.4043	upregulated	2	2.23194	0.1073
positive regulation of neurogenesis	GO	3 out of 6	22.9784	upregulated	22	5.33136	0.0048	upregulated	16	4.53082	0.0108	downregulated	40	13.1125	2e-06	upregulated	7	3.61085	0.027	upregulated	43	12.2952	4.6e-06	upregulated	27	11.0437	1.6e-05
amyloid-beta clearance	GO	2 out of 6	22.8592									downregulated	4	11.0243	1.6e-05	downregulated	4	15.5365	1.8e-07					downregulated	2	3.70157	0.0247
defense response to Gram-positive bacterium	GO	4 out of 6	22.8065	downregulated	1	0.330568	0.7185	upregulated	1	2.56722	0.0767	downregulated	9	9.98003	4.6e-05	downregulated	8	13.955	8.7e-07	upregulated	3	1.10818	0.3302
neural precursor cell proliferation	GO	5 out of 6	22.7913	upregulated	1	1.08374	0.3383	downregulated	1	0.689777	0.5017	downregulated	9	7.50455	0.0006	downregulated	7	5.13605	0.0059	upregulated	5	5.27232	0.0051	upregulated	3	5.27232	0.0051
embryonic organ development	GO	6 out of 6	22.7259	downregulated	14	2.90766	0.0546	downregulated	6	2.3517	0.0952	downregulated	27	3.36347	0.0346	downregulated	16	1.3741	0.2531	upregulated	36	4.35753	0.0128	upregulated	24	8.37142	0.0002
stem cell differentiation	GO	4 out of 6	22.6499	upregulated	9	2.15895	0.1154	upregulated	5	2.55874	0.0774	downregulated	21	18.8438	6.5e-09	downregulated	4	0.511967	0.5993	upregulated	14	4.72289	0.0089	upregulated	7	3.28896	0.0373
sterol transport	GO	4 out of 6	22.4867	upregulated	3	0.808329	0.4456	upregulated	4	1.9914	0.1365	downregulated	8	3.82093	0.0219	downregulated	7	10.4287	3e-05	upregulated	7	6.90594	0.001	upregulated	3	4.13094	0.0161
regulation of membrane lipid distribution	GO	5 out of 6	22.4473	downregulated	2	1.50893	0.2211	upregulated	2	1.52656	0.2173	downregulated	4	4.44116	0.0118	downregulated	4	4.97507	0.0069	upregulated	5	7.37546	0.0006	upregulated	2	5.67324	0.0034
cell fate commitment	GO	6 out of 6	22.3248	downregulated	8	1.44355	0.2361	downregulated	3	2.70872	0.0666	downregulated	24	8.93622	0.0001	downregulated	7	1.4006	0.2465	upregulated	20	2.46078	0.0854	upregulated	13	5.37489	0.0046
negative regulation of G1/S transition of mitotic cell cycle	GO	5 out of 6	22.2509	downregulated	2	0.302801	0.7387	upregulated	4	2.44609	0.0866	downregulated	16	10.8128	2e-05	downregulated	10	5.82968	0.0029	upregulated	13	3.63081	0.0265	upregulated	6	4.12097	0.0162
defense response to bacterium	GO	4 out of 6	22.2426	downregulated	7	2.35511	0.0949	upregulated	6	5.76537	0.0031	downregulated	17	10.7125	2.2e-05	downregulated	14	15.5562	1.8e-07	upregulated	6	2.01589	0.1332	downregulated	6	2.63176	0.072
regulation of hemopoiesis	GO	4 out of 6	22.2155	upregulated	7	0.909335	0.4028	upregulated	8	3.37372	0.0343	downregulated	38	7.87607	0.0004	downregulated	23	9.84954	5.3e-05	upregulated	34	3.31451	0.0364	upregulated	20	5.45849	0.0043
oxidoreductase activity, acting on paired donors, with incorporation or reduction of molecular oxygen, NAD(P)H as one donor, and incorporation of one atom of oxygen	GO	5 out of 6	22.1605	upregulated	1	0.514255	0.5979	downregulated	2	6.23956	0.002	downregulated	5	5.08079	0.0062	downregulated	3	4.64852	0.0096	upregulated	3	3.68239	0.0252	upregulated	3	3.02355	0.0486
intrinsic component of endoplasmic reticulum membrane	GO	2 out of 6	22.1581	upregulated	3	5.02192	0.0066	upregulated	7	1.10376	0.3316	downregulated	15	13.3354	1.6e-06	downregulated	15	17.0892	3.8e-08	downregulated	7	2.14082	0.1176	upregulated	4	0.796355	0.451
transcriptional repressor activity, RNA polymerase II proximal promoter sequence-specific DNA binding	GO	6 out of 6	22.1525	downregulated	4	0.521564	0.5936	downregulated	6	3.73324	0.0239	downregulated	13	1.93184	0.1449	downregulated	11	2.89666	0.0552	upregulated	19	6.85326	0.0011	upregulated	12	6.21589	0.002
myeloid cell development	GO	4 out of 6	22.1095	downregulated	1	2.21519	0.1091					downregulated	8	5.95433	0.0026	downregulated	7	10.5515	2.6e-05	upregulated	2	3.38843	0.0338	downregulated	2	2.13728	0.118
heart trabecula morphogenesis	GO	5 out of 6	21.8509	downregulated	4	4.30518	0.0135					downregulated	1	0.864758	0.4212	downregulated	4	2.97474	0.0511	upregulated	7	4.96738	0.007	upregulated	5	8.73887	0.0002
negative regulation of cell cycle G1/S phase transition	GO	5 out of 6	21.6562	downregulated	2	0.290247	0.7481	upregulated	4	2.39409	0.0913	downregulated	16	10.5251	2.7e-05	downregulated	10	5.69675	0.0034	upregulated	13	3.50259	0.0301	upregulated	6	4.03562	0.0177
protein complex involved in cell adhesion	GO	5 out of 6	21.5647	downregulated	2	2.35195	0.0952					downregulated	5	7.36458	0.0006	downregulated	5	8.94006	0.0001	upregulated	2	0.810313	0.4447	upregulated	2	2.09776	0.1227
Fc-epsilon receptor signaling pathway	GO	4 out of 6	21.5116	upregulated	5	1.35481	0.258	upregulated	1	0.177789	0.8371	downregulated	12	7.70462	0.0005	downregulated	12	11.7208	8.1e-06	upregulated	8	1.63092	0.1957	upregulated	6	1.98786	0.137
midbrain development	GO	5 out of 6	21.3478	upregulated	2	0.970636	0.3788	downregulated	2	3.19151	0.0411	downregulated	9	4.7339	0.0088	downregulated	4	1.31143	0.2694	upregulated	9	5.03426	0.0065	upregulated	7	7.07666	0.0008
HMG box domain binding	GO	4 out of 6	21.3172	upregulated	1	4.21007	0.0148					downregulated	4	5.91812	0.0027	downregulated	2	3.19957	0.0408	upregulated	4	8.70376	0.0002	upregulated	3	7.70586	0.0005
long-chain fatty acid binding	GO	4 out of 6	21.2604					downregulated	1	2.82665	0.0592	downregulated	3	12.4692	3.8e-06	downregulated	1	5.24738	0.0053	upregulated	1	0.717179	0.4881
spinal cord development	GO	5 out of 6	21.1845	downregulated	2	1.77024	0.1703	upregulated	3	2.7882	0.0615	downregulated	8	1.92935	0.1452	downregulated	4	1.16569	0.3117	upregulated	16	11.05	1.6e-05	upregulated	9	8.05736	0.0003
lung development	GO	5 out of 6	21.0933	downregulated	4	3.05018	0.0474	upregulated	8	3.69894	0.0247	downregulated	16	6.67227	0.0013	downregulated	10	4.93011	0.0072	upregulated	16	4.54615	0.0106	upregulated	10	5.59355	0.0037
wound healing	GO	4 out of 6	20.9938	upregulated	11	0.90325	0.4053	upregulated	17	4.64768	0.0096	downregulated	42	10.1913	3.7e-05	downregulated	24	8.69604	0.0002	upregulated	30	3.87278	0.0208	upregulated	18	3.78456	0.0227
regulation of JNK cascade	GO	5 out of 6	20.9554	downregulated	7	5.77069	0.0031	upregulated	6	2.48945	0.083	downregulated	16	7.73433	0.0004	downregulated	11	5.68186	0.0034	upregulated	16	3.11708	0.0443	upregulated	5	1.14092	0.3195
trabecula morphogenesis	GO	5 out of 6	20.9372	downregulated	5	4.71777	0.0089					downregulated	3	1.75846	0.1723	downregulated	4	2.06494	0.1268	upregulated	8	4.50948	0.011	upregulated	6	7.88658	0.0004
clathrin adaptor activity	GO	5 out of 6	20.9157	downregulated	2	3.90665	0.0201	downregulated	1	1.66351	0.1895	downregulated	3	5.86073	0.0028					upregulated	3	5.10279	0.0061	upregulated	2	4.38204	0.0125
endocytic adaptor activity	GO	5 out of 6	20.9157	downregulated	2	3.90665	0.0201	downregulated	1	1.66351	0.1895	downregulated	3	5.86073	0.0028					upregulated	3	5.10279	0.0061	upregulated	2	4.38204	0.0125
reactive oxygen species metabolic process	GO	4 out of 6	20.8447	upregulated	1	1.02499	0.3588	upregulated	2	1.81285	0.1632	downregulated	11	6.64247	0.0013	downregulated	10	9.95007	4.8e-05	upregulated	7	3.9881	0.0185	upregulated	4	3.10191	0.045
sterol metabolic process	GO	3 out of 6	20.8423	upregulated	3	0.395539	0.6733	upregulated	7	3.60152	0.0273	downregulated	10	7.88972	0.0004	downregulated	13	14.0625	7.8e-07	downregulated	11	6.52687	0.0015	upregulated	6	2.88716	0.0557
humoral immune response	GO	4 out of 6	20.8027	upregulated	1	1.64192	0.1936	upregulated	1	1.42002	0.2417	downregulated	16	8.23778	0.0003	downregulated	14	12.6524	3.2e-06	upregulated	4	1.80807	0.164	upregulated	1	1.16641	0.3115
phospholipid transport	GO	5 out of 6	20.7969	downregulated	2	0.56792	0.5667	upregulated	4	2.74759	0.0641	downregulated	7	4.52153	0.0109	downregulated	6	5.14327	0.0058	upregulated	10	9.12326	0.0001	upregulated	3	4.18852	0.0152
stem cell population maintenance	GO	5 out of 6	20.7725	downregulated	5	1.34945	0.2594	upregulated	5	2.68242	0.0684	downregulated	12	2.4003	0.0907	downregulated	7	1.88426	0.1519	upregulated	18	6.48389	0.0015	upregulated	12	11.3371	1.2e-05
regulation of actin filament organization	GO	4 out of 6	20.688	upregulated	15	3.83809	0.0215	upregulated	12	4.93548	0.0072	downregulated	23	5.4434	0.0043	downregulated	10	5.45805	0.0043	upregulated	23	10.0029	4.5e-05	upregulated	18	8.55721	0.0002
segmentation	GO	5 out of 6	20.5683	downregulated	3	1.86362	0.1551	downregulated	2	0.8979	0.4074	downregulated	10	5.71832	0.0033	downregulated	6	2.96524	0.0515	upregulated	13	5.53388	0.004	upregulated	6	5.45298	0.0043
neural tube development	GO	4 out of 6	20.5146	upregulated	6	1.15341	0.3156	upregulated	3	2.46993	0.0846	downregulated	11	4.14709	0.0158	downregulated	4	0.549923	0.577	upregulated	25	13.6717	1.2e-06	upregulated	12	5.76928	0.0031
regulation of regulated secretory pathway	GO	2 out of 6	20.498	upregulated	4	0.395931	0.6731	upregulated	4	1.71091	0.1807	downregulated	12	9.92653	4.9e-05	downregulated	10	15.143	2.7e-07	downregulated	4	1.17048	0.3102	downregulated	2	1.29423	0.2741
negative regulation of cellular component movement	GO	4 out of 6	20.4622	upregulated	17	5.38983	0.0046	upregulated	10	4.2279	0.0146	downregulated	33	7.37388	0.0006	downregulated	15	5.59354	0.0037	upregulated	26	5.69944	0.0033	upregulated	22	11.4131	1.1e-05
palmitoyltransferase complex	GO	4 out of 6	20.4286									downregulated	2	5.53668	0.0039	downregulated	3	7.17928	0.0008	upregulated	3	4.55979	0.0105	upregulated	1	3.15284	0.0427
maintenance of cell number	GO	5 out of 6	20.3362	downregulated	5	1.30008	0.2725	upregulated	5	2.61567	0.0731	downregulated	12	2.3811	0.0924	downregulated	7	1.86574	0.1548	upregulated	18	6.26042	0.0019	upregulated	12	11.1445	1.4e-05
respiratory tube development	GO	5 out of 6	20.3278	downregulated	4	3.00344	0.0496	upregulated	8	3.5519	0.0287	downregulated	16	6.41395	0.0016	downregulated	10	4.78099	0.0084	upregulated	16	4.27053	0.014	upregulated	10	5.41074	0.0045
neutrophil migration	GO	4 out of 6	20.2987	downregulated	3	1.55942	0.2103	upregulated	1	0.743002	0.4757	downregulated	13	10.3991	3e-05	downregulated	7	9.08041	0.0001	downregulated	2	0.329548	0.7192	upregulated	1	0.332282	0.7173
regulation of bone development	GO	6 out of 6	20.2529	downregulated	1	1.0435	0.3522	downregulated	1	1.3412	0.2615	downregulated	1	3.96044	0.0191	downregulated	1	4.43644	0.0118	upregulated	2	4.19809	0.015	upregulated	2	5.27326	0.0051
gland morphogenesis	GO	5 out of 6	20.2522	downregulated	5	1.61836	0.1982	downregulated	2	2.79864	0.0609	downregulated	7	1.1743	0.309	upregulated	1	0.937021	0.3918	upregulated	12	7.45567	0.0006	upregulated	7	8.14225	0.0003
mitotic DNA damage checkpoint	GO	4 out of 6	20.2172	upregulated	5	0.356425	0.7002	upregulated	6	2.63809	0.0715	downregulated	14	10.0344	4.4e-05	downregulated	10	5.66885	0.0035	upregulated	13	4.09134	0.0167	upregulated	7	3.41705	0.0328
growth factor binding	GO	5 out of 6	20.086	downregulated	6	2.89058	0.0555	upregulated	6	2.09738	0.1228	downregulated	9	5.67007	0.0034	downregulated	6	3.0573	0.047	upregulated	13	2.45589	0.0858	upregulated	9	8.10957	0.0003
regulation of cell division	GO	6 out of 6	20.0641	downregulated	2	1.86149	0.1554	downregulated	3	5.95711	0.0026	downregulated	17	6.10254	0.0022	downregulated	7	3.23803	0.0392	upregulated	13	1.74421	0.1748	upregulated	7	1.16075	0.3133
phosphatidylinositol phosphate binding	GO	5 out of 6	20.0106	downregulated	5	3.14284	0.0432	upregulated	1	1.76591	0.171	downregulated	14	5.67899	0.0034	downregulated	10	6.85971	0.001	upregulated	11	3.06734	0.0465	upregulated	7	3.02762	0.0484
ammonium transmembrane transport	GO	6 out of 6	19.9663	downregulated	2	3.5459	0.0288	downregulated	1	1.84661	0.1578	downregulated	2	4.18521	0.0152	downregulated	3	5.78599	0.0031	upregulated	2	1.69025	0.1845	upregulated	2	2.91232	0.0543
establishment of cell polarity	GO	5 out of 6	19.9107	upregulated	5	2.65315	0.0704	downregulated	3	2.86664	0.0569	downregulated	15	7.21225	0.0007	downregulated	9	4.90094	0.0074	upregulated	11	3.99732	0.0184	upregulated	8	3.58672	0.0277
response to starvation	GO	5 out of 6	19.8849	downregulated	3	4.11197	0.0164	upregulated	5	1.29604	0.2736	downregulated	13	3.43703	0.0322	downregulated	10	4.78126	0.0084	upregulated	13	5.52525	0.004	upregulated	8	3.32541	0.036
diencephalon development	GO	4 out of 6	19.8454	downregulated	1	1.21905	0.2955	upregulated	1	0.687228	0.503	downregulated	4	3.6127	0.027	upregulated	1	0.785661	0.4558	upregulated	9	7.76899	0.0004	upregulated	7	8.71756	0.0002
apical part of cell	GO	5 out of 6	19.7179	downregulated	11	2.79678	0.061	downregulated	7	1.76223	0.1717	downregulated	28	9.88595	5.1e-05	downregulated	16	5.39433	0.0045	downregulated	16	5.47554	0.0042	upregulated	17	5.35419	0.0047
response to nutrient	GO	5 out of 6	19.6055	downregulated	5	3.50998	0.0299	upregulated	11	7.68516	0.0005	downregulated	16	3.05932	0.0469	downregulated	16	9.78243	5.6e-05	upregulated	11	6.76816	0.0011	upregulated	8	4.1708	0.0154
tube formation	GO	5 out of 6	19.5884	downregulated	5	4.49052	0.0112	upregulated	5	2.48037	0.0837	downregulated	12	6.08384	0.0023	downregulated	5	0.564864	0.5684	upregulated	20	7.9372	0.0004	upregulated	9	2.9923	0.0502
peptidyl-threonine dephosphorylation	GO	4 out of 6	19.5375	upregulated	1	1.27283	0.28					downregulated	2	3.73156	0.024	downregulated	2	3.66808	0.0255	upregulated	3	4.90927	0.0074	upregulated	4	8.50145	0.0002
vacuole organization	GO	4 out of 6	19.5202	upregulated	5	1.03088	0.3567	upregulated	4	0.72646	0.4836	downregulated	16	9.87863	5.1e-05	downregulated	11	4.6632	0.0094	upregulated	8	3.95929	0.0191	upregulated	6	2.77644	0.0623
tertiary granule lumen	GO	5 out of 6	19.4728	downregulated	1	2.60215	0.0741	upregulated	1	0.878843	0.4153	downregulated	5	5.26302	0.0052	downregulated	4	6.36937	0.0017	upregulated	5	3.55254	0.0287	upregulated	1	2.56459	0.077
pattern specification process	GO	6 out of 6	19.3796	downregulated	12	3.30132	0.0368	downregulated	6	2.25666	0.1047	downregulated	23	4.68378	0.0092	downregulated	14	1.59861	0.2022	upregulated	32	2.58386	0.0755	upregulated	19	4.95542	0.007
NADPH oxidase complex	GO	3 out of 6	19.326									downregulated	4	8.70885	0.0002	downregulated	3	9.39875	8.3e-05	upregulated	1	1.21838	0.2957
extracellular matrix binding	GO	5 out of 6	19.1871	downregulated	1	2.83852	0.0585	upregulated	1	3.17471	0.0418	downregulated	5	7.30855	0.0007	downregulated	5	6.12535	0.0022	upregulated	5	2.55829	0.0774	upregulated	4	3.53104	0.0293
embryonic appendage morphogenesis	GO	5 out of 6	19.1493	downregulated	6	1.76344	0.1715	downregulated	2	2.22652	0.1079	downregulated	7	2.86805	0.0568	upregulated	2	1.1688	0.3107	upregulated	14	4.89831	0.0075	upregulated	8	8.56178	0.0002
cellular response to vascular endothelial growth factor stimulus	GO	6 out of 6	19.1286	downregulated	4	6.18911	0.0021	downregulated	2	1.44401	0.236	downregulated	4	2.59518	0.0746	downregulated	1	0.945159	0.3886	upregulated	7	5.83484	0.0029	upregulated	3	2.12033	0.12
regulation of supramolecular fiber organization	GO	4 out of 6	19.0985	upregulated	22	5.79217	0.0031	upregulated	15	3.60864	0.0271	downregulated	31	6.60128	0.0014	downregulated	16	7.73376	0.0004	upregulated	29	9.23694	9.7e-05	upregulated	18	4.92735	0.0072
embryonic organ morphogenesis	GO	5 out of 6	19.0812	downregulated	11	3.80308	0.0223	downregulated	5	3.049	0.0474	downregulated	19	3.06654	0.0466	upregulated	1	0.583276	0.5581	upregulated	21	3.98015	0.0187	upregulated	15	5.76574	0.0031
adult locomotory behavior	GO	4 out of 6	18.9902	upregulated	5	3.12261	0.044					downregulated	6	3.74951	0.0235	downregulated	7	7.54461	0.0005	upregulated	4	2.02929	0.1314	upregulated	4	5.66675	0.0035
antimicrobial humoral response	GO	5 out of 6	18.9717	downregulated	1	1.01222	0.3634	upregulated	1	2.24599	0.1058	downregulated	9	8.67022	0.0002	downregulated	6	6.8118	0.0011	upregulated	1	2.71053	0.0665	upregulated	1	2.0129	0.1336
extracellular matrix	GO	4 out of 6	18.9613	downregulated	14	3.33402	0.0356	upregulated	9	1.66654	0.1889	downregulated	18	3.37869	0.0341	upregulated	1	0.399518	0.6706	upregulated	25	8.01258	0.0003	upregulated	12	6.30203	0.0018
sarcolemma	GO	4 out of 6	18.9347	upregulated	5	1.31315	0.269	upregulated	5	5.19995	0.0055	downregulated	9	3.34113	0.0354	downregulated	4	2.36597	0.0939	upregulated	18	11.377	1.1e-05	upregulated	11	8.36368	0.0002
negative regulation of DNA-dependent DNA replication	GO	4 out of 6	18.8848	upregulated	1	0.707733	0.4928	upregulated	1	0.578658	0.5606	downregulated	3	3.43885	0.0321	downregulated	2	2.49383	0.0826	upregulated	6	8.67283	0.0002	upregulated	4	5.56569	0.0038
oxidoreductase activity, acting on the CH-CH group of donors, NAD or NADP as acceptor	GO	5 out of 6	18.8648	downregulated	1	1.783	0.1681	upregulated	1	2.63523	0.0717	downregulated	2	1.06826	0.3436	downregulated	4	8.44728	0.0002	upregulated	5	7.63651	0.0005	upregulated	2	2.565	0.0769
fat cell differentiation	GO	5 out of 6	18.8131	upregulated	5	1.72042	0.179	downregulated	2	0.625455	0.535	downregulated	7	2.69877	0.0673	downregulated	4	2.17376	0.1137	upregulated	13	8.09597	0.0003	upregulated	10	6.93957	0.001
regulation of axon guidance	GO	5 out of 6	18.725	downregulated	2	4.13406	0.016	upregulated	2	2.22494	0.1081	downregulated	5	5.28065	0.0051	downregulated	2	1.60833	0.2002	upregulated	6	4.23272	0.0145	upregulated	5	5.69414	0.0034
sterol binding	GO	5 out of 6	18.7139	downregulated	1	0.616447	0.5399	upregulated	5	4.89588	0.0075	downregulated	4	1.76015	0.172	downregulated	4	6.27906	0.0019	upregulated	7	8.87175	0.0001	upregulated	4	6.08239	0.0023
apical plasma membrane	GO	5 out of 6	18.7124	downregulated	10	3.03434	0.0481	downregulated	6	0.969583	0.3792	downregulated	24	10.8053	2e-05	downregulated	11	4.39175	0.0124	downregulated	11	4.68498	0.0092	upregulated	13	4.19639	0.015
response to ketone	GO	5 out of 6	18.6605	downregulated	4	4.93239	0.0072	upregulated	8	3.47385	0.031	downregulated	11	3.18543	0.0414	downregulated	12	5.28818	0.0051	upregulated	13	3.01629	0.049	upregulated	8	5.7121	0.0033
positive regulation of cell growth	GO	5 out of 6	18.6541	downregulated	4	1.79004	0.167	downregulated	4	3.32745	0.0359	downregulated	9	4.88216	0.0076	downregulated	12	5.24504	0.0053	upregulated	7	0.710537	0.4914	upregulated	7	3.40946	0.0331
positive regulation of cysteine-type endopeptidase activity	GO	5 out of 6	18.5821	downregulated	6	2.33499	0.0968	upregulated	3	4.87947	0.0076	downregulated	14	10.9912	1.7e-05	downregulated	7	1.07821	0.3402	upregulated	13	5.04439	0.0064	upregulated	5	4.01273	0.0181
phosphoprotein binding	GO	4 out of 6	18.5621	upregulated	6	3.74344	0.0237	upregulated	1	0.248619	0.7799	downregulated	11	8.07428	0.0003	downregulated	6	7.25717	0.0007	upregulated	9	2.81846	0.0597	upregulated	2	0.660837	0.5164
regulation of mitotic cell cycle phase transition	GO	4 out of 6	18.539	upregulated	21	1.72224	0.1787	upregulated	20	5.95205	0.0026	downregulated	40	13.4416	1.5e-06	downregulated	25	6.95965	0.0009	upregulated	29	2.05433	0.1282	upregulated	19	3.75777	0.0233
glycosaminoglycan binding	GO	2 out of 6	18.5317	downregulated	4	1.62252	0.1974	upregulated	8	2.60084	0.0742	downregulated	11	1.77883	0.1688	downregulated	7	5.56597	0.0038	upregulated	15	8.59004	0.0002	upregulated	11	9.94167	4.8e-05
gastrulation	GO	5 out of 6	18.4914	downregulated	4	3.02487	0.0486	upregulated	1	0.0729285	0.9297	downregulated	10	5.24873	0.0053	downregulated	6	5.19815	0.0055	upregulated	17	2.67188	0.0691	upregulated	7	2.42068	0.0889
negative regulation of leukocyte cell-cell adhesion	GO	5 out of 6	18.4526	downregulated	2	0.23503	0.7905	upregulated	3	0.776751	0.4599	downregulated	10	5.66443	0.0035	downregulated	5	7.48314	0.0006	upregulated	8	2.64923	0.0707	upregulated	3	3.19751	0.0409
female pregnancy	GO	5 out of 6	18.3211	downregulated	8	4.34874	0.0129	downregulated	3	0.92877	0.395	downregulated	12	5.67511	0.0034	downregulated	8	4.68345	0.0092	upregulated	10	2.55448	0.0777	upregulated	8	2.68504	0.0682
vascular endothelial growth factor signaling pathway	GO	6 out of 6	18.1488	downregulated	3	7.75091	0.0004	downregulated	2	2.28817	0.1015	downregulated	1	2.81314	0.06	downregulated	1	1.38864	0.2494	upregulated	3	1.93876	0.1439	upregulated	2	1.96918	0.1396
renal tubule morphogenesis	GO	5 out of 6	18.0789	upregulated	4	2.66735	0.0694	downregulated	3	2.59636	0.0745	downregulated	7	6.34919	0.0017	downregulated	4	3.51447	0.0298	upregulated	5	4.27405	0.0139	upregulated	3	4.01221	0.0181
regulation of actin polymerization or depolymerization	GO	4 out of 6	18.059	upregulated	10	1.17062	0.3102	upregulated	8	2.37168	0.0933	downregulated	14	2.4148	0.0894	downregulated	8	5.46958	0.0042	upregulated	14	6.16219	0.0021	upregulated	13	7.55478	0.0005
cell projection membrane	GO	5 out of 6	17.9752	downregulated	11	4.98013	0.0069	downregulated	7	1.10533	0.3311	downregulated	31	6.54669	0.0014	downregulated	16	4.18763	0.0152	upregulated	27	5.048	0.0064	upregulated	13	2.65409	0.0704
response to mechanical stimulus	GO	4 out of 6	17.8831	upregulated	6	1.7546	0.173	upregulated	9	5.33268	0.0048	downregulated	17	6.74913	0.0012	downregulated	14	8.02827	0.0003	upregulated	14	4.33581	0.0131	upregulated	9	5.85719	0.0029
positive regulation of lipid localization	GO	4 out of 6	17.8771	upregulated	3	2.32464	0.0978	upregulated	5	1.8691	0.1543	downregulated	6	5.43191	0.0044	downregulated	6	6.32753	0.0018	upregulated	10	6.49117	0.0015	upregulated	3	3.82024	0.0219
negative regulation of protein localization to nucleus	GO	6 out of 6	17.8363	downregulated	2	1.61722	0.1985	downregulated	1	4.74815	0.0087	downregulated	2	1.1678	0.3111	downregulated	2	2.55189	0.0779	upregulated	2	3.25693	0.0385	upregulated	4	4.49428	0.0112
response to nutrient levels	GO	4 out of 6	17.7187	downregulated	9	4.04072	0.0176	upregulated	17	6.11429	0.0022	upregulated	21	4.51427	0.011	downregulated	26	10.3667	3.1e-05	upregulated	30	6.63761	0.0013	upregulated	20	7.30227	0.0007
mesenchymal cell differentiation	GO	4 out of 6	17.708	upregulated	9	3.14018	0.0433	upregulated	2	2.54587	0.0784	downregulated	16	11.1024	1.5e-05	downregulated	10	3.33488	0.0356	upregulated	15	3.56406	0.0283	upregulated	9	5.39273	0.0045
neural crest cell development	GO	4 out of 6	17.6805	upregulated	5	2.01414	0.1334	upregulated	2	3.8123	0.0221	downregulated	12	11.8391	7.2e-06	downregulated	3	1.07167	0.3424	upregulated	10	5.71101	0.0033	upregulated	6	4.88514	0.0076
neurotransmitter metabolic process	GO	4 out of 6	17.6654	downregulated	3	4.0988	0.0166	upregulated	3	0.442767	0.6423	upregulated	6	4.20753	0.0149	downregulated	5	5.22666	0.0054	upregulated	5	4.27461	0.0139	upregulated	4	4.50815	0.011
basolateral plasma membrane	GO	5 out of 6	17.5972	downregulated	6	1.65826	0.1905	upregulated	7	4.27103	0.014	downregulated	14	4.446	0.0117	downregulated	9	5.55269	0.0039	upregulated	16	6.22087	0.002	upregulated	9	3.99042	0.0185
pallium development	GO	5 out of 6	17.5913	downregulated	2	0.500002	0.6065	upregulated	7	5.35066	0.0047	downregulated	11	3.54847	0.0288	downregulated	8	3.04886	0.0474	upregulated	17	7.93155	0.0004	upregulated	12	7.91309	0.0004
response to alcohol	GO	5 out of 6	17.5734	downregulated	3	1.02307	0.3595	upregulated	6	3.28884	0.0373	downregulated	16	4.55192	0.0105	downregulated	12	5.31786	0.0049	upregulated	14	6.57622	0.0014	upregulated	12	3.3932	0.0336
response to fungus	GO	4 out of 6	17.4811	upregulated	1	0.459693	0.6315	upregulated	2	2.84324	0.0582	downregulated	6	7.11469	0.0008	downregulated	3	5.16714	0.0057	upregulated	5	3.51186	0.0298	upregulated	3	4.99038	0.0068
nerve development	GO	5 out of 6	17.4637	downregulated	2	2.06666	0.1266	upregulated	2	0.751196	0.4718	downregulated	5	3.87937	0.0207	downregulated	1	0.0623672	0.9395	upregulated	7	5.02734	0.0066	upregulated	7	7.17912	0.0008
viral RNA genome replication	GO	5 out of 6	17.3701	upregulated	1	0.996781	0.3691	downregulated	1	4.92982	0.0072	downregulated	3	4.65355	0.0095	downregulated	1	2.74104	0.0645	upregulated	1	2.64968	0.0707	upregulated	1	3.39282	0.0336
regeneration	GO	5 out of 6	17.2431	downregulated	3	0.413523	0.6613	upregulated	4	3.72913	0.024	downregulated	16	6.15768	0.0021	downregulated	10	6.68734	0.0012	upregulated	10	4.14926	0.0158	upregulated	4	3.56439	0.0283
defense response to fungus	GO	4 out of 6	17.2227					upregulated	1	0.748987	0.4728	downregulated	3	6.84681	0.0011	downregulated	1	1.40128	0.2463	upregulated	2	3.9216	0.0198	upregulated	2	5.80197	0.003
regulation of Wnt signaling pathway	GO	5 out of 6	17.2088	downregulated	8	1.01092	0.3639	upregulated	7	0.850841	0.4271	downregulated	26	4.98636	0.0068	downregulated	12	1.52478	0.2177	upregulated	25	5.63562	0.0036	upregulated	16	4.90199	0.0074
autolysosome	GO	4 out of 6	17.1716									downregulated	2	4.58919	0.0102	downregulated	3	6.78428	0.0011	upregulated	2	2.91642	0.0541	upregulated	1	2.88166	0.056
inner ear development	GO	5 out of 6	17.1083	upregulated	9	3.29324	0.0371	downregulated	4	2.58334	0.0755	downregulated	10	3.269	0.038	downregulated	4	2.63094	0.072	upregulated	16	5.29763	0.005	upregulated	11	6.62061	0.0013
mitotic G2/M transition checkpoint	GO	4 out of 6	17.0474	upregulated	1	0.477588	0.6203	upregulated	2	1.12408	0.325	downregulated	5	5.61175	0.0037	downregulated	4	5.23711	0.0053	upregulated	5	4.65292	0.0095	upregulated	3	3.14727	0.043
regulation of cell size	GO	4 out of 6	17.0427	upregulated	8	2.34804	0.0956	upregulated	6	0.934858	0.3926	downregulated	17	6.86542	0.001	downregulated	12	4.55115	0.0106	upregulated	18	5.31618	0.0049	upregulated	8	3.59288	0.0275
NADP binding	GO	5 out of 6	16.8733	downregulated	2	1.66225	0.1897	upregulated	3	2.43311	0.0878	downregulated	9	7.21059	0.0007	downregulated	7	8.94281	0.0001	upregulated	3	0.822544	0.4393	upregulated	2	0.668241	0.5126
regulation of ERBB signaling pathway	GO	5 out of 6	16.8384	downregulated	4	3.23724	0.0393	downregulated	2	3.05541	0.0471	downregulated	10	7.22735	0.0007	downregulated	6	2.3122	0.099	downregulated	6	2.45175	0.0861	upregulated	6	3.45798	0.0315
developmental maturation	GO	5 out of 6	16.7929	downregulated	4	2.871	0.0566	upregulated	1	3.33756	0.0355	downregulated	21	5.38866	0.0046	downregulated	10	4.36686	0.0127	upregulated	18	2.31241	0.099	upregulated	14	5.19154	0.0056
regulation of stem cell differentiation	GO	6 out of 6	16.7822	downregulated	5	2.34466	0.0959	downregulated	3	2.04949	0.1288	downregulated	8	1.83174	0.1601	downregulated	2	0.245497	0.7823	upregulated	12	5.24323	0.0053	upregulated	7	5.06756	0.0063
limb morphogenesis	GO	5 out of 6	16.7703	downregulated	6	1.26606	0.2819	downregulated	2	2.08877	0.1238	downregulated	8	2.57014	0.0765	upregulated	3	1.89411	0.1505	upregulated	16	4.37548	0.0126	upregulated	9	8.364	0.0002
regulation of cell cycle phase transition	GO	4 out of 6	16.7663	upregulated	21	1.25163	0.286	upregulated	23	6.49121	0.0015	downregulated	40	11.4674	1e-05	downregulated	27	7.31568	0.0007	upregulated	31	2.06397	0.1269	upregulated	20	3.66208	0.0257
megakaryocyte development	GO	3 out of 6	16.6986									downregulated	4	7.07167	0.0008	downregulated	3	7.22622	0.0007	upregulated	1	2.40073	0.0907
cell maturation	GO	5 out of 6	16.68	downregulated	4	3.66704	0.0256	upregulated	1	3.7497	0.0235	downregulated	17	6.18724	0.0021	downregulated	9	6.13573	0.0022	upregulated	8	1.80712	0.1641	upregulated	6	2.63256	0.0719
stem cell development	GO	4 out of 6	16.674	upregulated	5	1.71834	0.1794	upregulated	3	3.64252	0.0262	downregulated	12	10.954	1.7e-05	downregulated	3	0.925866	0.3962	upregulated	10	5.44381	0.0043	upregulated	6	4.71121	0.009
GTPase regulator activity	GO	5 out of 6	16.6383	upregulated	17	3.53143	0.0293	downregulated	5	0.394528	0.674	downregulated	33	6.40143	0.0017	downregulated	22	8.82888	0.0001	upregulated	23	2.77988	0.062	upregulated	7	1.76505	0.1712
epithelial cell proliferation	GO	5 out of 6	16.6032	upregulated	5	2.37148	0.0933	downregulated	1	0.745154	0.4747	downregulated	9	6.21153	0.002	downregulated	5	4.83988	0.0079	upregulated	7	2.08756	0.124	upregulated	5	5.09055	0.0062
establishment of mitotic spindle localization	GO	5 out of 6	16.5922	downregulated	1	1.85016	0.1572	upregulated	1	0.749244	0.4727	downregulated	6	6.96185	0.0009	downregulated	3	3.54785	0.0288	upregulated	1	2.25182	0.1052	upregulated	2	2.72978	0.0652
Fc-gamma receptor signaling pathway involved in phagocytosis	GO	5 out of 6	16.5856	downregulated	5	2.89488	0.0553	downregulated	1	2.92908	0.0534	downregulated	10	5.39279	0.0045	downregulated	8	4.91838	0.0073	downregulated	4	2.11156	0.121	upregulated	4	0.450492	0.6373
positive regulation of tumor necrosis factor secretion	GO	5 out of 6	16.561	downregulated	1	1.75978	0.1721					downregulated	3	5.94428	0.0026	downregulated	2	4.50518	0.0111	upregulated	2	2.40967	0.0898	upregulated	1	1.94206	0.1434
regulation of hematopoietic progenitor cell differentiation	GO	6 out of 6	16.4991	downregulated	3	2.08203	0.1247	downregulated	1	4.42058	0.012	downregulated	5	3.32028	0.0361	downregulated	1	0.233857	0.7915	upregulated	7	4.1703	0.0154	upregulated	4	2.27208	0.1031
epidermis morphogenesis	GO	6 out of 6	16.4903	downregulated	2	1.8526	0.1568	downregulated	1	4.25386	0.0142	downregulated	5	5.51503	0.004	downregulated	1	3.40324	0.0333	upregulated	2	0.798464	0.45	upregulated	1	0.66715	0.5132
regulation of plasma lipoprotein particle levels	GO	5 out of 6	16.4123	downregulated	1	0.351697	0.7035	upregulated	4	3.16975	0.042	downregulated	6	6.1729	0.0021	downregulated	5	7.25437	0.0007	upregulated	7	4.28293	0.0138	upregulated	2	1.52017	0.2187
response to dsRNA	GO	5 out of 6	16.3632	downregulated	2	0.980748	0.375	upregulated	6	4.28668	0.0138	downregulated	11	4.18424	0.0152	downregulated	10	10.0124	4.5e-05	upregulated	10	3.87706	0.0207	upregulated	4	1.59544	0.2028
fatty acid biosynthetic process	GO	3 out of 6	16.3207	downregulated	6	6.69996	0.0012	upregulated	4	0.607512	0.5447	downregulated	10	5.30077	0.005	downregulated	7	8.06866	0.0003	upregulated	8	3.73722	0.0238	downregulated	4	3.14123	0.0432
cell adhesion mediator activity	GO	5 out of 6	16.3154	downregulated	3	1.92063	0.1465	upregulated	1	0.615243	0.5405	downregulated	7	7.48731	0.0006	downregulated	3	4.38977	0.0124	upregulated	2	1.80626	0.1643	upregulated	1	1.32668	0.2654
negative regulation of tumor necrosis factor superfamily cytokine production	GO	5 out of 6	16.3116	downregulated	1	1.28705	0.2761	upregulated	1	2.68145	0.0685	downregulated	5	5.64542	0.0035	downregulated	4	6.13373	0.0022	upregulated	3	3.32067	0.0361	upregulated	3	2.60616	0.0738
cellular response to extracellular stimulus	GO	4 out of 6	16.3051	downregulated	4	3.80864	0.0222	upregulated	6	4.15948	0.0156	upregulated	13	6.79454	0.0011	downregulated	15	7.20812	0.0007	upregulated	19	9.10988	0.0001	upregulated	13	7.13251	0.0008
dorsal/ventral pattern formation	GO	4 out of 6	16.2733	upregulated	1	0.0426825	0.9582	upregulated	2	0.539222	0.5832	downregulated	4	4.5747	0.0103	downregulated	3	1.7808	0.1685	upregulated	6	4.89393	0.0075	upregulated	4	5.6058	0.0037
response to toxic substance	GO	4 out of 6	16.2595	downregulated	12	2.83158	0.0589	upregulated	17	3.90723	0.0201	downregulated	33	8.27242	0.0003	downregulated	24	7.17831	0.0008	upregulated	33	6.25139	0.0019	downregulated	8	4.36697	0.0127
regulation of G1/S transition of mitotic cell cycle	GO	5 out of 6	16.234	downregulated	3	0.292559	0.7464	upregulated	6	2.27735	0.1026	downregulated	16	5.46687	0.0042	downregulated	11	4.13568	0.016	upregulated	16	2.61486	0.0732	upregulated	11	6.00137	0.0025
erythrocyte development	GO	5 out of 6	16.207	downregulated	1	2.90682	0.0546					downregulated	3	2.80585	0.0605	downregulated	2	3.13002	0.0437	upregulated	2	4.71993	0.0089	upregulated	2	2.64439	0.071
mesoderm development	GO	6 out of 6	16.1705	downregulated	7	4.26138	0.0141	downregulated	2	0.56435	0.5687	downregulated	8	3.31334	0.0364	downregulated	5	4.15593	0.0157	upregulated	10	1.93498	0.1444	upregulated	5	1.94054	0.1436
beta-catenin binding	GO	5 out of 6	16.1665	downregulated	4	1.63952	0.1941	upregulated	2	1.57776	0.2064	downregulated	8	4.41783	0.0121	downregulated	3	2.26802	0.1035	upregulated	10	5.91526	0.0027	upregulated	5	3.50365	0.0301
negative regulation of cell growth	GO	4 out of 6	16.1663	upregulated	9	1.12654	0.3242	downregulated	4	4.32186	0.0133	downregulated	18	8.32571	0.0002	upregulated	4	2.62848	0.0722	upregulated	15	3.52203	0.0295	upregulated	8	3.75169	0.0235
contractile fiber	GO	5 out of 6	16.162	downregulated	3	2.53081	0.0796	downregulated	5	2.04193	0.1298	downregulated	16	3.12825	0.0438	upregulated	3	2.75932	0.0633	upregulated	20	6.97483	0.0009	upregulated	12	4.24555	0.0143
structural constituent of muscle	GO	5 out of 6	16.1544					downregulated	1	1.01859	0.3611	downregulated	3	5.16714	0.0057	downregulated	3	3.83603	0.0216	upregulated	3	3.04612	0.0475	upregulated	3	3.08648	0.0457
extracellular matrix structural constituent	GO	2 out of 6	16.124	upregulated	5	2.41987	0.0889	upregulated	2	0.485971	0.6151	downregulated	9	0.761768	0.4668	downregulated	4	0.414534	0.6606	upregulated	9	7.73037	0.0004	upregulated	4	8.39361	0.0002
regulation of chromatin organization	GO	6 out of 6	16.1158	downregulated	4	2.04724	0.1291	downregulated	3	3.15678	0.0426	downregulated	15	2.05426	0.1282	downregulated	10	2.12172	0.1198	upregulated	19	4.70807	0.009	upregulated	8	2.02773	0.1316
peripheral nervous system development	GO	4 out of 6	16.0117	upregulated	1	0.593466	0.5524	upregulated	3	3.55212	0.0287	downregulated	13	14.521	4.9e-07	downregulated	3	1.15827	0.314	upregulated	5	1.478	0.2281	upregulated	5	3	0.0498
exocrine system development	GO	6 out of 6	15.9787	downregulated	3	3.45039	0.0317	downregulated	2	3.56027	0.0284	downregulated	5	4.04673	0.0175	downregulated	3	0.962668	0.3819	upregulated	7	1.82835	0.1607	upregulated	3	2.13032	0.1188
branching morphogenesis of an epithelial tube	GO	4 out of 6	15.9183	downregulated	8	3.23695	0.0393	upregulated	2	1.02432	0.359	downregulated	11	4.71845	0.0089	upregulated	1	0.778667	0.459	upregulated	12	4.54118	0.0107	upregulated	5	5.22471	0.0054
morphogenesis of embryonic epithelium	GO	4 out of 6	15.9045	upregulated	3	0.58956	0.5546	upregulated	4	2.52884	0.0798	downregulated	13	6.14111	0.0022	downregulated	4	0.637167	0.5288	upregulated	21	9.15942	0.0001	upregulated	9	3.08516	0.0457
transcription factor activity, RNA polymerase II transcription factor binding	GO	5 out of 6	15.8875	downregulated	2	0.77087	0.4626	upregulated	2	2.6641	0.0697	downregulated	2	3.16368	0.0423	downregulated	5	3.57732	0.028	upregulated	6	5.51989	0.004	upregulated	6	5.51989	0.004
regulation of ventricular cardiac muscle cell action potential	GO	4 out of 6	15.8867					downregulated	1	4.775	0.0084	downregulated	3	3.92197	0.0198					upregulated	2	3.44831	0.0318	upregulated	2	3.74138	0.0237
establishment of spindle orientation	GO	4 out of 6	15.8695	upregulated	1	2.5402	0.0789	upregulated	1	0.694333	0.4994	downregulated	6	6.54457	0.0014	downregulated	4	5.12262	0.006	upregulated	1	2.2098	0.1097	upregulated	2	2.6868	0.0681
regulation of myeloid cell differentiation	GO	4 out of 6	15.8593	upregulated	5	1.32814	0.265	upregulated	5	3.36151	0.0347	downregulated	19	2.97995	0.0508	downregulated	17	11.1939	1.4e-05	upregulated	22	2.42966	0.0881	upregulated	14	3.94544	0.0193
cell communication by electrical coupling involved in cardiac conduction	GO	4 out of 6	15.8563					downregulated	1	4.775	0.0084					downregulated	1	2.44233	0.087	upregulated	1	3.11008	0.0446	upregulated	2	5.52894	0.004
positive regulation of vascular associated smooth muscle cell migration	GO	3 out of 6	15.6923	downregulated	1	4.8997	0.0074					downregulated	1	4.14596	0.0158	downregulated	2	6.64664	0.0013
epidermis development	GO	6 out of 6	15.6616	downregulated	6	0.752719	0.4711	downregulated	5	2.07077	0.1261	downregulated	20	5.09275	0.0061	downregulated	8	1.93388	0.1446	upregulated	11	2.48659	0.0832	upregulated	12	3.32493	0.036
regulation of osteoclast development	GO	3 out of 6	15.6067													downregulated	1	4.97886	0.0069	upregulated	2	4.58363	0.0102	upregulated	2	6.04417	0.0024
regulation of cell cycle G1/S phase transition	GO	5 out of 6	15.6054	downregulated	3	0.245004	0.7827	upregulated	6	2.0868	0.1241	downregulated	16	4.82065	0.0081	downregulated	12	4.27031	0.014	upregulated	17	2.76005	0.0633	upregulated	12	5.59623	0.0037
myosin complex	GO	6 out of 6	15.5712	downregulated	2	3.0996	0.0451	downregulated	1	0.376892	0.686	downregulated	8	6.00055	0.0025	downregulated	4	4.03608	0.0177	upregulated	4	0.942703	0.3896	upregulated	1	1.11541	0.3278
epidermal cell differentiation	GO	6 out of 6	15.5694	downregulated	5	1.71868	0.1793	downregulated	5	2.52194	0.0803	downregulated	12	3.73463	0.0239	downregulated	2	1.71735	0.1795	upregulated	8	2.51569	0.0808	upregulated	8	3.36108	0.0347
negative regulation of locomotion	GO	4 out of 6	15.5275	upregulated	20	6.04008	0.0024	upregulated	11	4.08111	0.0169	downregulated	31	6.43064	0.0016	downregulated	15	5.40643	0.0045	upregulated	26	3.53188	0.0292	upregulated	23	10.2797	3.4e-05
cell part morphogenesis	GO	5 out of 6	15.4999	upregulated	28	6.52748	0.0015	downregulated	9	1.47746	0.2282	downregulated	40	10.0132	4.5e-05	downregulated	26	3.91881	0.0199	upregulated	41	5.73927	0.0032	upregulated	17	0.878617	0.4154
posttranscriptional gene silencing	GO	5 out of 6	15.4582	downregulated	1	0.2464	0.7816	upregulated	2	1.3047	0.2713	downregulated	11	4.94745	0.0071	downregulated	7	5.08059	0.0062	upregulated	7	2.96458	0.0516	upregulated	5	3.5239	0.0295
skin epidermis development	GO	5 out of 6	15.4369	upregulated	3	1.48298	0.227	downregulated	2	3.27009	0.038	downregulated	10	6.41319	0.0016	downregulated	6	3.47972	0.0308	upregulated	3	1.67364	0.1876	upregulated	4	2.08321	0.1245
negative regulation of protein serine/threonine kinase activity	GO	5 out of 6	15.4101	upregulated	6	1.45633	0.2331	downregulated	3	1.50158	0.2228	downregulated	11	4.14214	0.0159	downregulated	6	6.23137	0.002	upregulated	10	1.73194	0.1769	upregulated	8	3.25935	0.0384
defense response to other organism	GO	5 out of 6	15.3811	downregulated	12	2.30809	0.0995	upregulated	20	10.5651	2.6e-05	downregulated	28	6.71458	0.0012	downregulated	21	12.2416	4.8e-06	upregulated	16	3.51279	0.0298	upregulated	6	1.16911	0.3106
response to metal ion	GO	4 out of 6	15.3398	upregulated	18	2.8604	0.0572	upregulated	14	5.7227	0.0033	downregulated	20	8.89086	0.0001	downregulated	19	6.06224	0.0023	upregulated	27	6.74685	0.0012	upregulated	17	2.22297	0.1083
regulation of cardiac muscle cell contraction	GO	6 out of 6	15.3105	downregulated	1	2.27105	0.1032	downregulated	1	3.31709	0.0363	downregulated	4	2.87896	0.0562	downregulated	1	1.54551	0.2132	upregulated	3	3.27663	0.0378	upregulated	2	2.02123	0.1325
positive regulation of cysteine-type endopeptidase activity involved in apoptotic signaling pathway	GO	4 out of 6	15.2702	upregulated	1	0.906817	0.4038					downregulated	3	6.15784	0.0021	downregulated	1	1.15834	0.314	upregulated	2	4.77954	0.0084	upregulated	2	4.08128	0.0169
response to extracellular stimulus	GO	4 out of 6	15.2337	downregulated	9	3.81619	0.022	upregulated	17	5.9844	0.0025	upregulated	24	7.16824	0.0008	downregulated	27	10.2238	3.6e-05	upregulated	31	6.6758	0.0013	upregulated	21	7.67056	0.0005
regulation of lipid metabolic process	GO	4 out of 6	15.2272	upregulated	10	0.879545	0.415	upregulated	17	4.51156	0.011	downregulated	26	4.38899	0.0124	downregulated	21	8.90836	0.0001	upregulated	31	4.56341	0.0104	upregulated	16	2.75758	0.0634
Fc-gamma receptor signaling pathway	GO	5 out of 6	15.048	downregulated	6	3.80681	0.0222	downregulated	1	2.90431	0.0548	downregulated	10	5.18432	0.0056	downregulated	8	4.78629	0.0083	downregulated	4	2.0642	0.1269	upregulated	4	0.430477	0.6502
cytoplasmic region	GO	4 out of 6	15.0386	upregulated	32	4.51318	0.011	downregulated	9	2.8379	0.0585	downregulated	41	8.44985	0.0002	downregulated	26	7.46123	0.0006	upregulated	35	5.10767	0.0061	upregulated	14	0.802784	0.4481
alpha-linolenic acid metabolic process	GO	6 out of 6	15.0218	downregulated	1	1.47266	0.2293	downregulated	1	1.94866	0.1425	downregulated	3	4.44548	0.0117	downregulated	3	4.93879	0.0072	upregulated	2	1.31531	0.2684	upregulated	1	0.900909	0.4062
T cell selection	GO	3 out of 6	15.0182	downregulated	2	1.34157	0.2614					downregulated	5	5.18084	0.0056	downregulated	3	8.4958	0.0002
mesodermal cell differentiation	GO	5 out of 6	14.9927	downregulated	1	1.82775	0.1608					downregulated	4	7.30462	0.0007	downregulated	2	3.57203	0.0281	upregulated	3	1.71773	0.1795	upregulated	1	0.570548	0.5652
endocytic patch	GO	4 out of 6	14.9539	downregulated	2	4.31911	0.0133					downregulated	2	3.59636	0.0274					upregulated	1	2.33406	0.0969	upregulated	2	4.70439	0.0091
actin cortical patch	GO	4 out of 6	14.9539	downregulated	2	4.31911	0.0133					downregulated	2	3.59636	0.0274					upregulated	1	2.33406	0.0969	upregulated	2	4.70439	0.0091
regulation of response to wounding	GO	5 out of 6	14.943	downregulated	6	1.66597	0.189	upregulated	9	4.83061	0.008	downregulated	16	8.88271	0.0001	downregulated	12	6.81691	0.0011	upregulated	11	1.43046	0.2392	upregulated	5	0.977539	0.3762
adaptive thermogenesis	GO	4 out of 6	14.9393	downregulated	1	1.13213	0.3223					downregulated	5	5.65719	0.0035					upregulated	2	3.80404	0.0223	upregulated	2	4.34591	0.013
drug transport	GO	4 out of 6	14.7758	upregulated	5	1.42166	0.2413	downregulated	4	2.53977	0.0789	downregulated	7	9.60236	6.8e-05	downregulated	3	1.13898	0.3201	upregulated	7	3.03632	0.048	upregulated	6	2.41982	0.0889
hydrolase activity, acting on glycosyl bonds	GO	4 out of 6	14.7568	downregulated	3	1.68707	0.1851	upregulated	3	0.596034	0.551	downregulated	12	5.62137	0.0036	downregulated	9	6.83508	0.0011	downregulated	2	2.00627	0.1345	upregulated	5	3.21559	0.0401
regulation of microglial cell activation	GO	2 out of 6	14.736									downregulated	3	7.84287	0.0004	downregulated	3	10.8969	1.9e-05	downregulated	1	1.56981	0.2081	downregulated	1	2.43397	0.0877
cellular ketone metabolic process	GO	5 out of 6	14.6646	downregulated	2	0.894529	0.4088	upregulated	1	0.83041	0.4359	downregulated	4	0.976513	0.3766	downregulated	6	7.09683	0.0008	upregulated	6	3.59859	0.0274	upregulated	5	2.9286	0.0535
neuron projection fasciculation	GO	6 out of 6	14.6386	downregulated	1	2.20648	0.1101	downregulated	1	1.46325	0.2315	downregulated	2	3.64803	0.026	downregulated	2	3.17265	0.0419	upregulated	1	1.33242	0.2638	upregulated	2	2.81575	0.0599
negative regulation of sprouting angiogenesis	GO	5 out of 6	14.6208	downregulated	3	4.22399	0.0146	upregulated	1	0.484344	0.6161	downregulated	2	4.57412	0.0103	downregulated	3	3.40324	0.0333	upregulated	2	2.09894	0.1226	upregulated	1	0.804839	0.4472
cohesin complex	GO	4 out of 6	14.5974	downregulated	1	2.26365	0.104	downregulated	1	2.11974	0.1201									upregulated	4	6.31898	0.0018	upregulated	2	3.89503	0.0203
nuclear matrix	GO	4 out of 6	14.5275	upregulated	9	1.91591	0.1472	upregulated	5	0.704047	0.4946	downregulated	11	1.60731	0.2004	downregulated	9	6.61785	0.0013	upregulated	15	7.10157	0.0008	upregulated	7	1.82077	0.1619
cell recognition	GO	5 out of 6	14.5201	downregulated	7	2.6108	0.0735	upregulated	1	0.878474	0.4154	downregulated	8	2.4542	0.0859	downregulated	4	2.60134	0.0742	upregulated	4	3.66552	0.0256	upregulated	4	4.06671	0.0171
axon development	GO	4 out of 6	14.4778	upregulated	23	7.89887	0.0004	upregulated	5	1.31544	0.2684	downregulated	31	8.55717	0.0002	downregulated	23	5.80267	0.003	upregulated	34	5.98063	0.0025	upregulated	14	3.35164	0.035
secondary palate development	GO	4 out of 6	14.4583	downregulated	2	2.21841	0.1088					downregulated	3	3.08895	0.0455					upregulated	4	4.58205	0.0102	upregulated	3	4.56892	0.0104
transcription factor activity, RNA polymerase II proximal promoter sequence-specific DNA binding	GO	5 out of 6	14.4416	upregulated	16	2.35765	0.0946	downregulated	7	0.887748	0.4116	downregulated	32	1.51457	0.2199	downregulated	21	2.23593	0.1069	upregulated	44	6.8575	0.0011	upregulated	24	5.3035	0.005
superoxide metabolic process	GO	5 out of 6	14.4145	downregulated	1	0.786226	0.4556	downregulated	1	1.46283	0.2316	downregulated	6	6.14159	0.0022	downregulated	5	7.2117	0.0007	upregulated	3	1.33818	0.2623	downregulated	2	2.52607	0.08
aorta development	GO	4 out of 6	14.4054	upregulated	4	1.69752	0.1831	upregulated	1	1.44015	0.2369	downregulated	5	3.96502	0.019	downregulated	3	1.38189	0.2511	upregulated	11	7.25065	0.0007	upregulated	5	4.94547	0.0071
RNA polymerase II transcription factor binding	GO	5 out of 6	14.4049	downregulated	4	1.98473	0.1374	upregulated	4	1.51768	0.2192	downregulated	11	2.32326	0.098	downregulated	8	2.36652	0.0938	upregulated	13	4.62403	0.0098	upregulated	8	4.62403	0.0098
salivary gland morphogenesis	GO	6 out of 6	14.3843	downregulated	2	1.66368	0.1894	downregulated	2	3.83779	0.0215	downregulated	4	3.69972	0.0247	downregulated	2	0.692785	0.5002	upregulated	6	1.98162	0.1378	upregulated	3	2.50873	0.0814
clathrin adaptor complex	GO	6 out of 6	14.3577	downregulated	3	4.10961	0.0164	downregulated	2	2.37523	0.093	downregulated	4	3.71293	0.0244	downregulated	1	0.384084	0.6811	upregulated	2	1.25469	0.2852	upregulated	2	2.52113	0.0804
transcriptional activator activity, RNA polymerase II transcription factor binding	GO	5 out of 6	14.3567	downregulated	2	2.2978	0.1005					downregulated	2	4.21778	0.0147	downregulated	2	3.67306	0.0254	upregulated	2	1.66433	0.1893	upregulated	2	2.50368	0.0818
regulation of cardiac muscle cell action potential	GO	5 out of 6	14.3379	upregulated	1	0.470829	0.6245	downregulated	1	3.69315	0.0249	downregulated	3	2.18601	0.1124	downregulated	1	1.72908	0.1774	upregulated	3	3.31676	0.0363	upregulated	3	3.88369	0.0206
antimicrobial humoral immune response mediated by antimicrobial peptide	GO	5 out of 6	14.3354	downregulated	1	1.45272	0.2339	upregulated	1	2.75095	0.0639	downregulated	6	4.45586	0.0116	downregulated	4	5.28681	0.0051	upregulated	1	3.30632	0.0367	upregulated	1	2.58463	0.0754
negative regulation of endothelial cell apoptotic process	GO	5 out of 6	14.2139	downregulated	1	0.818305	0.4412					downregulated	2	0.910515	0.4023	downregulated	3	4.25831	0.0141	upregulated	2	2.61583	0.0731	upregulated	2	5.61095	0.0037
purinergic nucleotide receptor signaling pathway	GO	5 out of 6	14.2032	downregulated	1	4.92206	0.0073	upregulated	2	9.58348	6.9e-05	downregulated	2	3.01104	0.0492	downregulated	3	7.7877	0.0004	upregulated	2	5.0455	0.0064	upregulated	1	3.02035	0.0488
positive regulation of secretion	GO	4 out of 6	14.129	downregulated	7	1.09213	0.3355	upregulated	17	4.2738	0.0139	downregulated	24	6.36961	0.0017	downregulated	19	12.2123	5e-06	upregulated	27	1.20624	0.2993	downregulated	8	2.47751	0.084
serine-type peptidase activity	GO	5 out of 6	14.1149	downregulated	10	4.65587	0.0095	downregulated	2	1.91596	0.1472	upregulated	4	3.52628	0.0294	downregulated	9	7.88437	0.0004	upregulated	7	1.91836	0.1468	upregulated	4	1.26666	0.2818
basement membrane	GO	2 out of 6	14.0757	downregulated	3	2.74669	0.0641	upregulated	2	1.68035	0.1863	downregulated	6	2.42219	0.0887	downregulated	2	0.446461	0.6399	upregulated	12	9.8665	5.2e-05	upregulated	3	4.20918	0.0149
transcription factor activity, transcription factor binding	GO	5 out of 6	14.0523	downregulated	2	0.572956	0.5639	upregulated	4	3.16025	0.0424	downregulated	2	2.97711	0.0509	downregulated	5	2.97235	0.0512	upregulated	7	5.34508	0.0048	upregulated	6	5.34508	0.0048
negative regulation of cellular protein localization	GO	4 out of 6	14.0514	upregulated	7	2.1211	0.1199	downregulated	3	3.53273	0.0292	upregulated	3	3.35335	0.035	downregulated	4	1.38386	0.2506	upregulated	11	7.19126	0.0008	upregulated	10	7.41806	0.0006
establishment of spindle localization	GO	4 out of 6	14.0389	upregulated	1	2.23663	0.1068	upregulated	1	0.48789	0.6139	downregulated	7	6.03378	0.0024	downregulated	4	4.03664	0.0177	upregulated	1	1.99258	0.1363	upregulated	2	2.46381	0.0851
lipid transporter activity	GO	2 out of 6	14.0302	downregulated	4	1.20146	0.3008	upregulated	4	0.9702	0.379	downregulated	10	5.06257	0.0063	downregulated	8	7.31667	0.0007	upregulated	11	8.33172	0.0002	upregulated	5	5.6985	0.0034
negative regulation of bone development	GO	3 out of 6	13.9691									downregulated	1	4.77631	0.0084					upregulated	1	4.96164	0.007	upregulated	1	4.23118	0.0145
perinuclear endoplasmic reticulum	GO	5 out of 6	13.9669	downregulated	1	1.42045	0.2416	upregulated	1	0.781329	0.4578	downregulated	3	2.27993	0.1023	downregulated	4	5.82809	0.0029	upregulated	1	2.26644	0.1037	upregulated	2	2.95334	0.0522
hair cycle process	GO	5 out of 6	13.9349	upregulated	3	1.4574	0.2328	downregulated	2	3.23492	0.0394	downregulated	9	5.09036	0.0062	downregulated	6	3.31526	0.0363	upregulated	3	1.65158	0.1917	upregulated	5	2.10016	0.1224
actin polymerization or depolymerization	GO	5 out of 6	13.9261	upregulated	2	1.70952	0.181	downregulated	2	5.12769	0.0059	downregulated	4	1.47605	0.2285	downregulated	1	0.606787	0.5451	upregulated	6	4.13876	0.0159	upregulated	5	4.28629	0.0138
serine hydrolase activity	GO	5 out of 6	13.9018	downregulated	10	4.54099	0.0107	downregulated	2	1.89693	0.15	upregulated	4	3.47416	0.031	downregulated	10	7.80692	0.0004	upregulated	7	1.8902	0.151	upregulated	4	1.24095	0.2891
regulation of exocytosis	GO	3 out of 6	13.889	upregulated	9	4.13856	0.0159	upregulated	6	1.06259	0.3456	downregulated	15	7.55007	0.0005	downregulated	12	11.0847	1.5e-05	upregulated	8	1.40951	0.2443	downregulated	2	0.954047	0.3852
heterophilic cell-cell adhesion via plasma membrane cell adhesion molecules	GO	6 out of 6	13.8117	downregulated	3	2.83189	0.0589	downregulated	1	0.663068	0.5153	downregulated	4	4.79279	0.0083	downregulated	1	1.59888	0.2021	upregulated	4	2.69028	0.0679	upregulated	1	1.23483	0.2909
gland development	GO	4 out of 6	13.7462	downregulated	14	4.56983	0.0104	upregulated	8	2.74059	0.0645	downregulated	32	3.8256	0.0218	upregulated	8	4.00663	0.0182	upregulated	25	5.08197	0.0062	upregulated	21	7.01598	0.0009
negative regulation of hemopoiesis	GO	5 out of 6	13.7087	downregulated	4	0.794147	0.452	upregulated	4	6.25185	0.0019	downregulated	11	3.44644	0.0319	downregulated	7	3.24601	0.0389	upregulated	11	4.98327	0.0069	upregulated	11	7.49065	0.0006
chemosensory behavior	GO	4 out of 6	13.6482	downregulated	1	2.08746	0.124					downregulated	1	0.533206	0.5867					upregulated	3	5.05877	0.0064	upregulated	3	5.96877	0.0026
cell-cell adhesion mediator activity	GO	5 out of 6	13.644	downregulated	2	1.19807	0.3018	upregulated	1	0.739471	0.4774	downregulated	6	6.18877	0.0021	downregulated	2	3.52306	0.0295	upregulated	2	1.98176	0.1378	upregulated	1	1.49182	0.225
aorta morphogenesis	GO	5 out of 6	13.6305	downregulated	2	1.64928	0.1922	upregulated	1	2.14815	0.1167	downregulated	2	1.1181	0.3269	downregulated	1	0.859694	0.4233	upregulated	7	5.80635	0.003	upregulated	3	6.34525	0.0018
structural constituent of myelin sheath	GO	2 out of 6	13.5985	downregulated	2	5.99192	0.0025					downregulated	4	7.60662	0.0005
cytokine secretion	GO	5 out of 6	13.5732	downregulated	1	0.420996	0.6564	upregulated	1	2.86557	0.057	downregulated	4	2.53302	0.0794	downregulated	5	6.45072	0.0016	upregulated	2	4.87173	0.0077	upregulated	2	2.16232	0.1151
stem cell division	GO	5 out of 6	13.5618	upregulated	2	0.701532	0.4958	downregulated	2	4.3545	0.0128	downregulated	3	4.63723	0.0097	downregulated	3	3.33829	0.0355	upregulated	2	0.560581	0.5709	upregulated	2	1.37273	0.2534
promoter-specific chromatin binding	GO	5 out of 6	13.5384	downregulated	1	1.2069	0.2991					downregulated	6	3.51345	0.0298	downregulated	3	2.97432	0.0511	upregulated	4	2.48722	0.0831	upregulated	3	3.35651	0.0349
mediator complex	GO	4 out of 6	13.4391	upregulated	1	0.254801	0.7751	upregulated	2	2.16369	0.1149	downregulated	5	3.91221	0.02	downregulated	3	2.5817	0.0756	upregulated	5	3.76083	0.0233	upregulated	3	3.43916	0.0321
RNA localization	GO	2 out of 6	13.3833	downregulated	3	0.25203	0.7772	upregulated	10	2.23661	0.1068	downregulated	21	6.24716	0.0019	downregulated	16	8.39439	0.0002	upregulated	23	7.21527	0.0007	upregulated	14	6.16801	0.0021
actin-based cell projection	GO	4 out of 6	13.367	downregulated	4	5.0596	0.0063	downregulated	3	2.341	0.0962	downregulated	20	5.18371	0.0056	downregulated	11	8.02777	0.0003	downregulated	5	7.24509	0.0007	downregulated	3	2.35437	0.095
negative regulation of adherens junction organization	GO	3 out of 6	13.3544	upregulated	1	2.42741	0.0883					downregulated	2	1.65596	0.1909	upregulated	1	3.02745	0.0484	upregulated	4	8.78205	0.0002	upregulated	3	8.3713	0.0002
collagen-activated signaling pathway	GO	3 out of 6	13.3512									downregulated	3	5.74429	0.0032	downregulated	2	6.45423	0.0016	upregulated	1	1.15271	0.3158
negative regulation of cell cycle G2/M phase transition	GO	4 out of 6	13.3063	upregulated	3	0.388194	0.6783	upregulated	4	1.49962	0.2232	downregulated	7	5.41907	0.0044	downregulated	6	4.58284	0.0102	upregulated	7	3.39367	0.0336	upregulated	3	1.79853	0.1655
kinase activator activity	GO	5 out of 6	13.2714	upregulated	4	0.562308	0.5699	downregulated	1	1.12997	0.323	downregulated	6	5.11219	0.006	downregulated	6	3.05291	0.0472	upregulated	5	2.61627	0.0731	upregulated	4	1.92233	0.1463
blood microparticle	GO	3 out of 6	13.2692	downregulated	3	0.853382	0.426	upregulated	2	0.0902197	0.9137	downregulated	9	7.2562	0.0007	downregulated	5	7.23862	0.0007	downregulated	2	0.645641	0.5243	downregulated	3	1.98881	0.1369
endoplasmic reticulum lumen	GO	2 out of 6	13.2305	downregulated	10	4.26955	0.014	upregulated	8	1.36645	0.255	downregulated	21	4.33368	0.0131	downregulated	14	8.37465	0.0002	upregulated	15	6.29298	0.0018	upregulated	11	6.93753	0.001
structural constituent of nuclear pore	GO	4 out of 6	13.1946	upregulated	1	0.344601	0.7085	upregulated	1	0.649471	0.5223	downregulated	3	1.331	0.2642	downregulated	4	4.34835	0.0129	upregulated	5	3.50564	0.03	upregulated	4	5.0037	0.0067
nuclear transcription factor complex	GO	4 out of 6	13.1747	downregulated	10	4.66615	0.0094	upregulated	7	1.50106	0.2229	downregulated	17	2.21675	0.109	upregulated	2	2.68584	0.0682	upregulated	26	6.04869	0.0024	upregulated	16	4.43002	0.0119
positive regulation of regulated secretory pathway	GO	4 out of 6	13.161	downregulated	1	0.54378	0.5805	upregulated	2	1.68469	0.1855	downregulated	5	5.97738	0.0025	downregulated	4	7.75316	0.0004	upregulated	1	0.571341	0.5648	downregulated	1	2.1407	0.1176
phosphatidylinositol bisphosphate binding	GO	5 out of 6	13.1398	downregulated	3	1.10333	0.3318	upregulated	1	2.20788	0.1099	downregulated	9	3.9811	0.0187	downregulated	5	5.73784	0.0032	upregulated	7	2.69773	0.0674	upregulated	4	1.82766	0.1608
positive regulation of apoptotic signaling pathway	GO	5 out of 6	13.0808	downregulated	6	1.6199	0.1979	upregulated	8	5.99558	0.0025	downregulated	17	5.67735	0.0034	downregulated	12	3.25941	0.0384	upregulated	14	3.67693	0.0253	upregulated	12	4.84282	0.0079
cell-matrix adhesion	GO	4 out of 6	13.046	upregulated	4	1.03948	0.3536	upregulated	3	1.4364	0.2378	downregulated	10	2.61417	0.0732	downregulated	7	7.09324	0.0008	upregulated	12	4.13788	0.016	upregulated	7	1.67653	0.187
positive regulation of transcription from RNA polymerase II promoter involved in cellular response to chemical stimulus	GO	5 out of 6	13.0443	downregulated	2	3.66463	0.0256	upregulated	1	0.852094	0.4265	downregulated	4	3.83822	0.0215	downregulated	2	3.04528	0.0476	upregulated	4	2.60257	0.0741	upregulated	1	0.745714	0.4744
cardiac muscle cell development	GO	5 out of 6	13.0274	downregulated	3	2.61831	0.0729	upregulated	3	1.51759	0.2192	downregulated	4	4.37894	0.0125	downregulated	2	3.47202	0.0311	upregulated	6	3.20612	0.0405	upregulated	2	0.869552	0.4191
glial cell projection	GO	5 out of 6	13.0123					downregulated	1	1.06991	0.343	downregulated	2	3.53428	0.0292	downregulated	3	4.82913	0.008	upregulated	3	1.57262	0.2075	upregulated	2	2.0064	0.1345
actin filament	GO	2 out of 6	13.0084	upregulated	5	2.239	0.1066	upregulated	4	0.745661	0.4744	downregulated	6	1.12969	0.3231	downregulated	4	1.40488	0.2454	upregulated	14	8.25175	0.0003	upregulated	9	4.75666	0.0086
regulation of development, heterochronic	GO	5 out of 6	12.9682	downregulated	1	1.35223	0.2587	upregulated	1	1.63685	0.1946	downregulated	2	4.19569	0.0151	downregulated	2	2.54566	0.0784	upregulated	1	3.01089	0.0492	upregulated	1	3.50052	0.0302
endothelial cell differentiation	GO	5 out of 6	12.9501	downregulated	5	4.6546	0.0095	upregulated	5	3.0059	0.0495	downregulated	9	4.06683	0.0171	downregulated	4	1.9275	0.1455	upregulated	7	2.43951	0.0872	upregulated	3	2.86754	0.0568
connective tissue development	GO	5 out of 6	12.9083	downregulated	9	2.12057	0.12	upregulated	5	3.34669	0.0352	downregulated	9	0.806983	0.4462	downregulated	6	2.96619	0.0515	upregulated	19	4.5364	0.0107	upregulated	10	5.82483	0.003
positive regulation of ERBB signaling pathway	GO	4 out of 6	12.8974	downregulated	3	4.77867	0.0084	upregulated	1	0.652769	0.5206	downregulated	4	4.47847	0.0114	downregulated	2	1.33126	0.2641	downregulated	2	2.16444	0.1148	upregulated	3	2.96175	0.0517
microtubule organizing center localization	GO	4 out of 6	12.8648	downregulated	1	1.7564	0.1727	upregulated	2	1.84986	0.1573	downregulated	8	10.24	3.6e-05	downregulated	3	3.44291	0.032	upregulated	1	0.156919	0.8548	downregulated	1	0.881646	0.4141
positive regulation of mitochondrial outer membrane permeabilization involved in apoptotic signaling pathway	GO	6 out of 6	12.8327	downregulated	3	2.88359	0.0559	downregulated	1	1.14754	0.3174	downregulated	4	2.5308	0.0796	downregulated	1	0.5116	0.5995	upregulated	3	2.12445	0.1195	upregulated	3	3.63468	0.0264
DNA repair complex	GO	4 out of 6	12.8223	upregulated	1	0.472687	0.6233	upregulated	3	3.30841	0.0366	downregulated	6	5.78214	0.0031	downregulated	3	2.6025	0.0741	upregulated	4	3.25989	0.0384	upregulated	5	4.95886	0.007
transcription elongation factor complex	GO	6 out of 6	12.8201	downregulated	1	0.471111	0.6243	downregulated	2	1.77355	0.1697	downregulated	2	0.163145	0.8495	downregulated	5	2.57989	0.0758	upregulated	8	4.85817	0.0078	upregulated	4	2.97422	0.0511
intramolecular transferase activity	GO	3 out of 6	12.7977	upregulated	1	0.636593	0.5291	downregulated	1	2.4188	0.089	downregulated	2	3.25466	0.0386	downregulated	4	7.76087	0.0004
positive regulation of cellular component movement	GO	3 out of 6	12.7876	downregulated	14	5.18043	0.0056	upregulated	16	5.48183	0.0042	downregulated	47	14.9477	3.2e-07	downregulated	27	8.12187	0.0003	downregulated	20	5.05298	0.0064	downregulated	12	4.9276	0.0072
positive regulation of cell motility	GO	3 out of 6	12.7778	downregulated	14	5.25652	0.0052	upregulated	16	5.63097	0.0036	downregulated	46	14.8709	3.5e-07	downregulated	27	8.43898	0.0002	downregulated	20	5.1639	0.0057	downregulated	12	4.99376	0.0068
regulation of complement activation	GO	3 out of 6	12.725	downregulated	2	1.44843	0.2349					downregulated	4	2.62622	0.0724	downregulated	4	9.96954	4.7e-05	downregulated	1	1.31915	0.2674
regulation of tumor necrosis factor secretion	GO	5 out of 6	12.7093	downregulated	1	1.34016	0.2618					downregulated	3	4.44248	0.0118	downregulated	2	3.77218	0.023	upregulated	2	1.63775	0.1944	upregulated	1	1.51675	0.2194
lung alveolus development	GO	5 out of 6	12.6691	downregulated	1	1.45462	0.2335	upregulated	1	0.607491	0.5447	downregulated	6	5.70897	0.0033	downregulated	3	2.78365	0.0618	upregulated	3	1.82514	0.1612	upregulated	2	1.50422	0.2222
embryonic digestive tract development	GO	4 out of 6	12.6512	downregulated	2	1.54239	0.2139					downregulated	3	2.41082	0.0897	upregulated	1	2.33247	0.0971	upregulated	7	5.52236	0.004	upregulated	3	5.50809	0.0041
regulation of p38MAPK cascade	GO	6 out of 6	12.6492	downregulated	1	3.18558	0.0414	downregulated	1	0.817769	0.4414	downregulated	4	3.80507	0.0223	downregulated	1	0.7624	0.4665	upregulated	3	2.97278	0.0512	upregulated	1	1.10556	0.331
antibacterial humoral response	GO	3 out of 6	12.6487					upregulated	1	3.25438	0.0386	downregulated	4	5.45715	0.0043	downregulated	5	9.82914	5.4e-05	upregulated	1	3.64367	0.0262	downregulated	2	3.02684	0.0485
regulation of chemotaxis	GO	3 out of 6	12.6413	upregulated	4	1.87214	0.1538	upregulated	6	4.34453	0.013	downregulated	21	11.8089	7.4e-06	downregulated	13	7.78224	0.0004	downregulated	10	3.12634	0.0439	upregulated	11	2.39316	0.0913
renal tubule development	GO	5 out of 6	12.6263	upregulated	7	6.23429	0.002	downregulated	3	2.2085	0.1099	downregulated	9	6.01341	0.0024	downregulated	5	2.9895	0.0503	upregulated	5	4.00622	0.0182	upregulated	3	3.643	0.0262
spindle localization	GO	4 out of 6	12.6093	upregulated	1	2.07947	0.125	upregulated	1	0.392548	0.6753	downregulated	7	5.21325	0.0054	downregulated	4	3.49787	0.0303	upregulated	1	1.85921	0.1558	upregulated	3	2.43152	0.0879
regulation of actin cytoskeleton reorganization	GO	4 out of 6	12.6073	downregulated	2	4.5151	0.0109	downregulated	1	4.123	0.0162	downregulated	4	2.62669	0.0723					upregulated	2	2.25585	0.1048	downregulated	1	0.913315	0.4012
regulation of organ growth	GO	5 out of 6	12.6053	upregulated	6	3.97103	0.0189	downregulated	3	1.68436	0.1856	downregulated	8	4.7784	0.0084	downregulated	6	2.64051	0.0713	upregulated	6	2.35825	0.0946	upregulated	5	5.11478	0.006
protein import	GO	4 out of 6	12.5797	upregulated	6	0.44144	0.6431	upregulated	8	2.32477	0.0978	downregulated	6	1.51084	0.2207	downregulated	7	5.16687	0.0057	upregulated	16	3.30043	0.0369	upregulated	11	5.3678	0.0047
anterior/posterior pattern specification	GO	5 out of 6	12.5712	upregulated	10	1.94932	0.1424	downregulated	3	1.82181	0.1617	downregulated	14	1.77839	0.1689	downregulated	6	1.02223	0.3598	upregulated	21	4.30412	0.0135	upregulated	11	3.64464	0.0261
regulation of intrinsic apoptotic signaling pathway in response to DNA damage	GO	4 out of 6	12.5398	upregulated	3	1.03599	0.3549	upregulated	3	3.13548	0.0435	downregulated	2	2.06571	0.1267	downregulated	6	9.07475	0.0001	upregulated	4	4.36491	0.0127	upregulated	1	1.20591	0.2994
basal part of cell	GO	4 out of 6	12.5342	downregulated	1	0.506674	0.6025	upregulated	3	5.6884	0.0034	downregulated	10	11.5269	9.9e-06	downregulated	6	5.14787	0.0058	upregulated	4	3.35348	0.035	downregulated	1	2.31237	0.099
asymmetric stem cell division	GO	5 out of 6	12.5117	upregulated	1	1.07341	0.3418	downregulated	1	4.82294	0.008	downregulated	1	1.67922	0.1865	downregulated	2	3.27727	0.0377	upregulated	1	1.94012	0.1437	upregulated	1	1.8656	0.1548
negative T cell selection	GO	2 out of 6	12.5014	upregulated	1	1.20047	0.3011					downregulated	2	7.06749	0.0009	downregulated	2	6.63436	0.0013
genitalia development	GO	5 out of 6	12.5	downregulated	2	1.66949	0.1883	downregulated	1	1.11236	0.3288	downregulated	3	4.07411	0.017					upregulated	3	2.47435	0.0842	upregulated	3	3.16972	0.042
regulation of bicellular tight junction assembly	GO	4 out of 6	12.4808					upregulated	1	0.629185	0.533	downregulated	3	3.76148	0.0232	downregulated	1	1.02602	0.3584	upregulated	4	4.43627	0.0118	upregulated	2	3.8862	0.0205
nucleus localization	GO	4 out of 6	12.473					upregulated	3	4.67268	0.0093	downregulated	7	10.5465	2.6e-05	downregulated	2	2.85821	0.0574	upregulated	3	2.54218	0.0787	upregulated	1	1.1988	0.3016
apoptotic process involved in development	GO	4 out of 6	12.454	upregulated	1	2.67367	0.069					downregulated	2	1.47933	0.2278	downregulated	2	2.59324	0.0748	upregulated	4	5.30066	0.005	upregulated	3	5.75445	0.0032
quinone metabolic process	GO	4 out of 6	12.4378	upregulated	1	0.802111	0.4484	upregulated	1	1.4754	0.2287	downregulated	3	1.35811	0.2571	downregulated	4	6.5572	0.0014	upregulated	3	4.53467	0.0107	upregulated	2	2.26538	0.1038
cellular response to leukemia inhibitory factor	GO	4 out of 6	12.4336	upregulated	8	2.29851	0.1004	upregulated	6	1.82561	0.1611	downregulated	10	5.98978	0.0025	downregulated	8	4.8961	0.0075	upregulated	12	4.07991	0.0169	upregulated	5	1.5919	0.2035
viral genome replication	GO	5 out of 6	12.3677	upregulated	2	1.13827	0.3204	downregulated	1	4.17328	0.0154	downregulated	3	2.6901	0.0679	downregulated	1	2.04522	0.1294	upregulated	1	1.92066	0.1465	upregulated	1	2.67676	0.0688
determination of adult lifespan	GO	4 out of 6	12.3378									downregulated	4	7.47737	0.0006	downregulated	1	1.56132	0.2099	upregulated	1	1.27017	0.2808	upregulated	1	2.02899	0.1315
ficolin-1-rich granule membrane	GO	3 out of 6	12.33	downregulated	1	0.451306	0.6368	upregulated	5	3.47996	0.0308	downregulated	5	6.32526	0.0018	downregulated	7	14.4428	5.3e-07	downregulated	2	2.57337	0.0763	downregulated	3	2.83604	0.0587
positive regulation of muscle tissue development	GO	5 out of 6	12.2461	upregulated	5	3.67547	0.0253	downregulated	1	0.742934	0.4757	downregulated	6	5.4043	0.0045	downregulated	2	0.98662	0.3728	upregulated	4	2.65047	0.0706	upregulated	4	6.13722	0.0022
regulation of binding	GO	5 out of 6	12.2344	downregulated	8	2.02254	0.1323	downregulated	5	3.61193	0.027	downregulated	21	1.48397	0.2267	upregulated	7	3.32468	0.036	upregulated	32	3.70459	0.0246	upregulated	19	4.73605	0.0088
vacuolar transport	GO	3 out of 6	12.2125	upregulated	8	3.2461	0.0389	upregulated	7	1.75907	0.1722	upregulated	8	4.96023	0.007	downregulated	13	8.9963	0.0001	upregulated	10	3.52031	0.0296	upregulated	8	6.41517	0.0016
gene silencing	GO	5 out of 6	12.1612	downregulated	1	0.0388932	0.9619	upregulated	6	1.37267	0.2534	downregulated	17	3.29058	0.0372	downregulated	12	5.07531	0.0062	upregulated	13	2.27896	0.1024	upregulated	7	2.85016	0.0578
ventral spinal cord development	GO	4 out of 6	12.1128					upregulated	1	1.80114	0.1651	downregulated	3	1.39821	0.247	downregulated	1	0.239384	0.7871	upregulated	6	6.29577	0.0018	upregulated	4	5.98053	0.0025
regulation of endothelial cell apoptotic process	GO	5 out of 6	12.0677	upregulated	2	2.41038	0.0898	downregulated	1	1.30595	0.2709	downregulated	3	1.56754	0.2086	downregulated	4	3.65201	0.0259	upregulated	4	3.29009	0.0373	upregulated	2	4.66247	0.0094
regulation of cell fate specification	GO	4 out of 6	12.0581	downregulated	1	1.93909	0.1438	downregulated	1	2.16772	0.1144									upregulated	1	1.95959	0.1409	upregulated	2	5.99173	0.0025
negative regulation of amyloid precursor protein catabolic process	GO	3 out of 6	12.0144					upregulated	1	1.07838	0.3401	downregulated	2	1.62926	0.1961					upregulated	4	7.39728	0.0006	upregulated	2	4.06622	0.0171
hydrolase activity, hydrolyzing N-glycosyl compounds	GO	4 out of 6	11.9287					upregulated	1	1.56838	0.2084	downregulated	2	3.05445	0.0471	downregulated	3	3.96367	0.019	upregulated	3	2.56491	0.0769	upregulated	2	3.91407	0.02
negative regulation of protein localization to cell surface	GO	4 out of 6	11.9036	downregulated	1	1.75511	0.1729	upregulated	2	3.46663	0.0312					downregulated	1	1.06029	0.3464	upregulated	3	5.14815	0.0058	upregulated	3	7.40667	0.0006
positive regulation of supramolecular fiber organization	GO	3 out of 6	11.8876	upregulated	6	1.69848	0.183	upregulated	6	2.40238	0.0905	downregulated	20	7.45792	0.0006	downregulated	9	5.21244	0.0054	downregulated	7	2.63629	0.0716	upregulated	10	3.31807	0.0362
RNA polymerase II proximal promoter sequence-specific DNA binding	GO	4 out of 6	11.8819	downregulated	18	2.38096	0.0925	downregulated	5	0.463851	0.6289	downregulated	37	1.20696	0.2991	upregulated	4	1.12337	0.3252	upregulated	51	5.89911	0.0027	upregulated	28	5.43535	0.0044
carboxylic ester hydrolase activity	GO	6 out of 6	11.8757	downregulated	2	1.21363	0.2971	downregulated	1	0.338641	0.7127	downregulated	6	4.3275	0.0132	downregulated	6	2.79393	0.0612	upregulated	5	1.42023	0.2417	upregulated	2	1.7818	0.1683
regulation of lamellipodium morphogenesis	GO	4 out of 6	11.855	downregulated	2	2.87471	0.0564					downregulated	3	3.04182	0.0477	downregulated	2	4.5381	0.0107	upregulated	2	3.0018	0.0497	downregulated	1	1.6014	0.2016
establishment or maintenance of monopolar cell polarity	GO	5 out of 6	11.7601	downregulated	1	1.05968	0.3466	downregulated	1	4.6227	0.0098	downregulated	1	0.364645	0.6944					upregulated	3	2.55525	0.0777	upregulated	2	3.15784	0.0425
axon guidance	GO	5 out of 6	11.7434	upregulated	15	4.95215	0.0071	downregulated	3	0.30954	0.7338	downregulated	20	6.33959	0.0018	downregulated	14	4.11551	0.0163	upregulated	22	5.10525	0.0061	upregulated	7	0.825664	0.4379
collagen-containing extracellular matrix	GO	3 out of 6	11.7292	downregulated	7	2.3905	0.0916	upregulated	6	1.40656	0.245	upregulated	7	4.18556	0.0152	upregulated	1	0.660962	0.5164	upregulated	21	8.35092	0.0002	upregulated	7	7.24084	0.0007
dopamine metabolic process	GO	4 out of 6	11.713	upregulated	2	1.05859	0.3469	upregulated	1	2.67716	0.0688	downregulated	2	3.50457	0.0301	downregulated	2	2.6931	0.0677	upregulated	3	4.19012	0.0151	upregulated	2	5.06098	0.0063
regulation of execution phase of apoptosis	GO	4 out of 6	11.7003	upregulated	1	2.09151	0.1235					downregulated	5	4.5007	0.0111	downregulated	4	4.29227	0.0137	upregulated	3	2.77388	0.0624	upregulated	2	2.22497	0.1081
IRES-dependent viral translational initiation	GO	4 out of 6	11.6515									downregulated	3	4.77413	0.0084	downregulated	2	5.08038	0.0062	upregulated	1	0.447775	0.639	upregulated	1	1.34922	0.2594
positive regulation of interleukin-8 secretion	GO	4 out of 6	11.6441					upregulated	1	2.79718	0.061	downregulated	2	2.06073	0.1274	downregulated	3	9.19459	0.0001	upregulated	2	1.5067	0.2216	upregulated	1	1.67929	0.1865
positive T cell selection	GO	3 out of 6	11.6186	downregulated	2	1.87495	0.1534					downregulated	4	4.91185	0.0074	downregulated	2	4.83178	0.008
neuron projection guidance	GO	5 out of 6	11.6039	upregulated	15	4.91286	0.0074	downregulated	3	0.304245	0.7377	downregulated	20	6.25158	0.0019	downregulated	14	4.0691	0.0171	upregulated	22	5.07209	0.0063	upregulated	7	0.819697	0.4406
protein binding involved in heterotypic cell-cell adhesion	GO	3 out of 6	11.5938									downregulated	3	7.1672	0.0008	downregulated	1	2.9585	0.0519	downregulated	1	1.56692	0.2087	upregulated	1	3.03499	0.0481
negative regulation of cell motility	GO	4 out of 6	11.4897	upregulated	15	4.18284	0.0153	upregulated	9	3.27336	0.0379	downregulated	27	4.33533	0.0131	downregulated	14	6.03488	0.0024	upregulated	19	2.30423	0.0998	upregulated	16	6.27148	0.0019
centriole assembly	GO	5 out of 6	11.4891					downregulated	1	2.50737	0.0815	downregulated	5	3.3547	0.0349	downregulated	2	1.44757	0.2351	upregulated	1	2.2765	0.1026	upregulated	2	1.90294	0.1491
midbody	GO	5 out of 6	11.4753	upregulated	12	2.9596	0.0518	downregulated	3	5.96984	0.0026	downregulated	18	3.95039	0.0192	downregulated	8	1.45166	0.2342	upregulated	11	1.38829	0.2495	upregulated	7	1.67475	0.1874
positive regulation of protein serine/threonine kinase activity	GO	4 out of 6	11.4606	downregulated	5	2.88677	0.0558	upregulated	8	1.26202	0.2831	downregulated	20	7.78524	0.0004	downregulated	20	6.34994	0.0017	downregulated	21	6.55069	0.0014	upregulated	14	0.989325	0.3718
phospholipid transporter activity	GO	2 out of 6	11.383	downregulated	2	0.814728	0.4428	upregulated	2	1.953	0.1418	downregulated	4	3.26461	0.0382	downregulated	4	3.23379	0.0394	upregulated	4	6.54322	0.0014	upregulated	2	4.83983	0.0079
blastoderm segmentation	GO	5 out of 6	11.3474	downregulated	2	2.87471	0.0564					downregulated	2	2.94345	0.0527	downregulated	1	0.938826	0.3911	upregulated	2	1.46093	0.232	upregulated	2	3.12948	0.0437
myosin II complex	GO	3 out of 6	11.3217					downregulated	1	1.13362	0.3219	downregulated	5	6.13436	0.0022	downregulated	2	5.01702	0.0066	downregulated	1	0.963305	0.3816
cell-cell adhesion via plasma-membrane adhesion molecules	GO	5 out of 6	11.2991	upregulated	13	8.37044	0.0002	downregulated	5	1.17288	0.3095	downregulated	16	8.48411	0.0002	downregulated	7	5.20656	0.0055	upregulated	10	3.62593	0.0266	upregulated	2	1.18008	0.3073
negative regulation of supramolecular fiber organization	GO	3 out of 6	11.2942	upregulated	13	4.27664	0.0139	upregulated	8	1.89533	0.1503	upregulated	6	1.79168	0.1667	downregulated	5	5.48423	0.0042	upregulated	12	9.90442	5e-05	upregulated	8	3.86915	0.0209
cell cortex	GO	2 out of 6	11.2898	upregulated	14	3.34547	0.0352	upregulated	14	2.93862	0.0529	downregulated	37	15.4706	1.9e-07	downregulated	21	8.34804	0.0002	upregulated	28	9.08714	0.0001	upregulated	13	2.20267	0.1105
detection of abiotic stimulus	GO	4 out of 6	11.2629	upregulated	4	3.19564	0.0409	downregulated	3	2.92027	0.0539	downregulated	8	4.75006	0.0087	downregulated	8	8.12871	0.0003	upregulated	4	0.536352	0.5849	downregulated	3	1.87685	0.1531
cell-substrate adhesion	GO	4 out of 6	11.2285	upregulated	5	1.46936	0.2301	upregulated	4	2.54803	0.0782	downregulated	13	1.93415	0.1445	downregulated	10	7.5313	0.0005	upregulated	16	3.69191	0.0249	upregulated	10	2.08855	0.1239
C21-steroid hormone metabolic process	GO	4 out of 6	11.2203	upregulated	1	1.6237	0.1972					downregulated	1	0.463692	0.629	downregulated	3	4.8837	0.0076	upregulated	4	4.63992	0.0097	upregulated	3	2.8567	0.0575
tissue regeneration	GO	5 out of 6	11.2062	downregulated	1	0.390984	0.6764	upregulated	1	0.329439	0.7193	downregulated	5	3.89697	0.0203	downregulated	2	3.6714	0.0254	upregulated	4	1.92956	0.1452	upregulated	2	1.64673	0.1927
autophagosome organization	GO	3 out of 6	11.2048	upregulated	2	0.519569	0.5948	upregulated	1	0.187551	0.829	downregulated	9	7.4196	0.0006	downregulated	4	1.62751	0.1964	downregulated	3	1.3259	0.2656	upregulated	5	4.19066	0.0151
mesoderm morphogenesis	GO	4 out of 6	11.1605	downregulated	3	2.14931	0.1166	upregulated	1	0.325663	0.722	downregulated	4	4.28155	0.0138	downregulated	2	2.46115	0.0853	upregulated	7	2.59413	0.0747	upregulated	3	2.39787	0.0909
cellular response to thyroid hormone stimulus	GO	4 out of 6	11.1525					upregulated	1	2.15853	0.1155	downregulated	1	2.90874	0.0545	downregulated	2	4.90414	0.0074	upregulated	2	1.11988	0.3263	upregulated	1	2.21975	0.1086
regulation of transcription from RNA polymerase II promoter in response to hypoxia	GO	5 out of 6	11.1229	downregulated	2	3.24886	0.0388	upregulated	1	1.94973	0.1423	downregulated	4	2.53861	0.079	downregulated	4	3.15309	0.0427	upregulated	4	2.49731	0.0823	upregulated	2	1.63474	0.195
cartilage development	GO	5 out of 6	11.0974	downregulated	8	2.39708	0.091	upregulated	5	3.60208	0.0273	downregulated	7	0.972632	0.3781	downregulated	5	3.43283	0.0323	upregulated	16	3.23695	0.0393	upregulated	8	4.65998	0.0095
detoxification	GO	4 out of 6	11.0971	downregulated	2	0.873676	0.4174	upregulated	7	4.54149	0.0107	downregulated	5	5.93511	0.0026	downregulated	4	3.29929	0.0369	upregulated	12	12.9096	2.5e-06	downregulated	3	7.37907	0.0006
regulation of cellular senescence	GO	4 out of 6	11.0956	upregulated	2	1.25671	0.2846	upregulated	3	2.45911	0.0855	downregulated	4	1.71808	0.1794	downregulated	2	0.863967	0.4215	upregulated	4	7.08097	0.0008	upregulated	3	5.14843	0.0058
amine catabolic process	GO	4 out of 6	11.0932	downregulated	2	2.68992	0.0679					upregulated	2	3.96294	0.019	downregulated	2	2.90446	0.0548	upregulated	2	3.59415	0.0275	upregulated	2	1.90465	0.1489
oxidoreductase activity, acting on the CH-OH group of donors, NAD or NADP as acceptor	GO	4 out of 6	11.0785	downregulated	3	2.26817	0.1035	upregulated	6	2.76263	0.0631	upregulated	3	2.2643	0.1039	downregulated	10	7.4019	0.0006	upregulated	6	2.01822	0.1329	upregulated	6	2.15282	0.1162
roof of mouth development	GO	3 out of 6	11.0463	upregulated	5	3.24736	0.0389					upregulated	7	4.05233	0.0174	downregulated	2	0.94497	0.3887	upregulated	11	6.85115	0.0011	upregulated	8	7.30253	0.0007
positive regulation of lamellipodium organization	GO	5 out of 6	11.0415	upregulated	1	1.35342	0.2584	downregulated	1	4.123	0.0162	downregulated	5	3.7242	0.0241	downregulated	3	2.64492	0.071	upregulated	2	0.490889	0.6121	upregulated	2	1.41195	0.2437
pre-mRNA binding	GO	4 out of 6	11.0381	upregulated	2	1.17907	0.3076	downregulated	1	3.67269	0.0254	downregulated	6	3.69972	0.0247	downregulated	2	2.74772	0.0641	upregulated	4	4.07239	0.017	downregulated	2	1.97537	0.1387
negative regulation of leukocyte apoptotic process	GO	4 out of 6	11.0354	upregulated	1	1.24366	0.2883					downregulated	5	3.79144	0.0226	downregulated	4	4.11023	0.0164	upregulated	4	2.3249	0.0978	upregulated	2	2.05249	0.1284
extracellular matrix structural constituent conferring compression resistance	GO	3 out of 6	11.0166	upregulated	1	1.11421	0.3282					downregulated	1	0.484572	0.616					upregulated	1	5.62069	0.0036	upregulated	1	6.02558	0.0024
microtubule cytoskeleton organization involved in mitosis	GO	4 out of 6	11.0147	upregulated	5	1.48772	0.2259	upregulated	5	2.22579	0.108	downregulated	14	7.72989	0.0004	downregulated	7	3.18435	0.0414	upregulated	4	2.25112	0.1053	upregulated	4	1.5628	0.2095
thymic T cell selection	GO	2 out of 6	10.9986	upregulated	1	0.826196	0.4377					downregulated	2	6.13218	0.0022	downregulated	2	5.69263	0.0034
embryonic pattern specification	GO	5 out of 6	10.9972	downregulated	4	2.42434	0.0885	downregulated	1	2.9808	0.0508	downregulated	4	4.00523	0.0182	upregulated	1	0.918966	0.3989	upregulated	5	1.43505	0.2381	upregulated	2	1.07074	0.3428
oxidoreductase activity, acting on CH-OH group of donors	GO	4 out of 6	10.9811	downregulated	3	2.10254	0.1221	upregulated	6	2.35215	0.0952	upregulated	3	2.10079	0.1224	downregulated	10	6.63515	0.0013	upregulated	6	1.78026	0.1686	upregulated	7	2.81525	0.0599
negative regulation of response to wounding	GO	5 out of 6	10.873	downregulated	3	1.83304	0.1599	upregulated	5	2.17051	0.1141	downregulated	7	3.80779	0.0222	downregulated	5	2.99441	0.0501	upregulated	7	2.48575	0.0833	upregulated	3	1.92251	0.1462
RNA polymerase II activating transcription factor binding	GO	5 out of 6	10.8521	downregulated	2	2.59914	0.0743	upregulated	1	0.346016	0.7075	downregulated	3	0.646701	0.5238	downregulated	3	2.78644	0.0616	upregulated	4	1.32207	0.2666	upregulated	3	3.84373	0.0214
transcriptional repressor activity, RNA polymerase II transcription factor binding	GO	3 out of 6	10.8481					upregulated	2	4.6648	0.0094	upregulated	1	2.00977	0.134	downregulated	2	3.46723	0.0312	upregulated	4	6.71269	0.0012	upregulated	4	7.34278	0.0006
lysosomal transport	GO	3 out of 6	10.815	upregulated	7	3.66588	0.0256	upregulated	6	2.19684	0.1112	upregulated	5	3.89314	0.0204	downregulated	7	5.07146	0.0063	upregulated	9	3.85857	0.0211	upregulated	8	7.97495	0.0003
steroid binding	GO	2 out of 6	10.8142	upregulated	2	4.77407	0.0084	upregulated	5	2.96017	0.0518	downregulated	6	1.77801	0.169	downregulated	6	5.58034	0.0038	upregulated	8	6.62806	0.0013	upregulated	4	4.18616	0.0152
protein localization to endosome	GO	6 out of 6	10.8026	downregulated	1	2.80853	0.0603	downregulated	1	1.594	0.2031	downregulated	1	0.6967	0.4982	downregulated	1	1.3244	0.266	upregulated	1	2.28107	0.1022	upregulated	1	2.09786	0.1227
dendritic cell differentiation	GO	2 out of 6	10.7868	upregulated	1	1.29536	0.2738	upregulated	1	0.636653	0.5291	downregulated	6	9.18136	0.0001	downregulated	3	4.63861	0.0097					downregulated	1	1.10111	0.3325
peptidyl-tyrosine autophosphorylation	GO	3 out of 6	10.6922	upregulated	1	0.225539	0.7981	upregulated	1	1.10736	0.3304	downregulated	5	6.02632	0.0024	downregulated	6	5.94319	0.0026	upregulated	2	2.32716	0.0976	downregulated	2	2.27159	0.1031
neurotrophin signaling pathway	GO	5 out of 6	10.6604	downregulated	1	1.62249	0.1974					downregulated	3	0.764908	0.4654	downregulated	1	1.0701	0.343	upregulated	3	2.83799	0.0585	upregulated	2	4.3649	0.0127
regulation of actomyosin structure organization	GO	5 out of 6	10.6584	upregulated	9	7.64507	0.0005	downregulated	1	3.03116	0.0483	downregulated	9	4.15693	0.0157	downregulated	2	0.893062	0.4094	upregulated	11	7.93096	0.0004	upregulated	6	2.29133	0.1011
neurotransmitter receptor transport	GO	4 out of 6	10.6473	upregulated	3	2.73177	0.0651	downregulated	2	3.09205	0.0454	downregulated	2	3.00968	0.0493					upregulated	2	3.40658	0.0332	upregulated	2	3.87071	0.0208
positive regulation of leukocyte apoptotic process	GO	4 out of 6	10.6169	upregulated	2	3.84553	0.0214					downregulated	5	6.638	0.0013	downregulated	2	3.39873	0.0334	upregulated	4	3.32154	0.0361	upregulated	1	1.1042	0.3315
ventricular cardiac muscle cell action potential	GO	3 out of 6	10.5756					downregulated	2	7.47103	0.0006					downregulated	1	2.31225	0.099	downregulated	1	1.19199	0.3036	upregulated	1	1.98434	0.1375
heart development	GO	4 out of 6	10.5643	upregulated	31	5.79126	0.0031	downregulated	8	2.42716	0.0883	downregulated	30	4.71577	0.009	upregulated	6	2.58398	0.0755	upregulated	50	5.19194	0.0056	upregulated	28	6.60469	0.0014
localization within membrane	GO	4 out of 6	10.5602	upregulated	8	2.80643	0.0604	downregulated	4	2.10399	0.122	downregulated	10	5.3106	0.0049	downregulated	7	6.19683	0.002	downregulated	3	1.04351	0.3522	upregulated	3	0.798742	0.4499
embryonic digit morphogenesis	GO	3 out of 6	10.4833	upregulated	5	1.61912	0.1981	downregulated	1	2.90025	0.055	upregulated	2	0.839494	0.4319	upregulated	1	0.918966	0.3989	upregulated	8	5.98072	0.0025	upregulated	4	4.97994	0.0069
neuropilin binding	GO	4 out of 6	10.482	upregulated	1	1.74968	0.1738	upregulated	1	3.09808	0.0451	downregulated	5	8.70806	0.0002	downregulated	1	1.06907	0.3433	upregulated	2	1.45477	0.2335	upregulated	3	4.09787	0.0166
erythrocyte maturation	GO	4 out of 6	10.4798	downregulated	1	3.88427	0.0206					downregulated	1	1.44014	0.2369	downregulated	1	2.15708	0.1157	upregulated	1	2.99837	0.0499
cell volume homeostasis	GO	4 out of 6	10.4517	downregulated	1	1.88014	0.1526					downregulated	3	3.51437	0.0298	downregulated	3	3.31239	0.0364	upregulated	2	1.74476	0.1747
retromer complex	GO	3 out of 6	10.4507									upregulated	1	2.16252	0.115	downregulated	3	2.79091	0.0614	upregulated	4	2.93919	0.0529	upregulated	4	6.88311	0.001
response to cAMP	GO	5 out of 6	10.4476	downregulated	4	5.60456	0.0037	downregulated	1	0.278231	0.7571	downregulated	6	1.16735	0.3112	downregulated	7	3.97458	0.0188	upregulated	8	2.65074	0.0706	downregulated	4	3.22781	0.0396
basal plasma membrane	GO	4 out of 6	10.4426	downregulated	1	0.799626	0.4495	upregulated	2	6.09359	0.0023	downregulated	6	9.00995	0.0001	downregulated	4	4.81244	0.0081	upregulated	4	4.61561	0.0099	downregulated	1	2.70147	0.0671
regulation of protein depolymerization	GO	4 out of 6	10.4418	downregulated	3	1.43857	0.2373	upregulated	7	2.948	0.0524	upregulated	6	2.65586	0.0702	downregulated	4	5.95584	0.0026	upregulated	8	6.4548	0.0016	upregulated	4	2.19642	0.1112
cellular biogenic amine metabolic process	GO	4 out of 6	10.4295	downregulated	3	4.83697	0.0079	upregulated	2	0.630243	0.5325	upregulated	4	4.48458	0.0113	downregulated	3	2.74959	0.064	upregulated	3	2.24316	0.1061	upregulated	2	1.22998	0.2923
positive regulation of plasma membrane bounded cell projection assembly	GO	4 out of 6	10.374	upregulated	4	2.76893	0.0627	upregulated	3	5.06708	0.0063	downregulated	13	5.62531	0.0036	downregulated	9	7.55119	0.0005	upregulated	6	2.30606	0.0997	upregulated	4	2.72743	0.0654
oxygen binding	GO	4 out of 6	10.3694	downregulated	2	2.31158	0.0991					downregulated	1	4.68171	0.0093					upregulated	2	1.00499	0.366	upregulated	1	2.37117	0.0934
semaphorin-plexin signaling pathway involved in neuron projection guidance	GO	4 out of 6	10.3427	downregulated	1	2.3986	0.0908					downregulated	3	2.03235	0.131					upregulated	3	2.78229	0.0619	upregulated	2	3.12948	0.0437
regulation of epithelial cell apoptotic process	GO	5 out of 6	10.3381	upregulated	2	1.89152	0.1508	downregulated	1	0.861353	0.4226	downregulated	7	2.15339	0.1161	downregulated	6	3.62465	0.0267	upregulated	8	1.98338	0.1376	upregulated	3	3.60686	0.0271
establishment of protein localization to plasma membrane	GO	4 out of 6	10.3284	upregulated	4	1.65083	0.1919	downregulated	3	3.11349	0.0444	upregulated	1	1.70975	0.1809	downregulated	2	1.76632	0.171	upregulated	5	5.3194	0.0049	upregulated	3	3.4898	0.0305
regulation of Notch signaling pathway	GO	5 out of 6	10.3219	downregulated	5	2.47952	0.0838	upregulated	2	1.56235	0.2096	downregulated	9	2.06252	0.1271	downregulated	3	0.916945	0.3997	upregulated	9	3.5277	0.0294	upregulated	5	2.89762	0.0552
response to ethanol	GO	4 out of 6	10.2566	upregulated	1	0.399669	0.6705	upregulated	4	3.8518	0.0212	downregulated	8	5.15229	0.0058	downregulated	5	2.18168	0.1129	upregulated	8	3.53286	0.0292	upregulated	5	3.64124	0.0262
neurotransmitter:sodium symporter activity	GO	2 out of 6	10.2475	upregulated	2	5.30702	0.005					upregulated	1	7.09367	0.0008					upregulated	5	3.81668	0.022	upregulated	4	6.43084	0.0016
neuron fate specification	GO	3 out of 6	10.2171									downregulated	3	2.25445	0.1049					upregulated	3	4.51584	0.0109	upregulated	2	3.44677	0.0318
positive regulation of chromosome separation	GO	3 out of 6	10.2064									downregulated	3	5.11383	0.006	downregulated	3	4.33083	0.0132	upregulated	1	0.761774	0.4668
RNA export from nucleus	GO	2 out of 6	10.1714	downregulated	2	0.184168	0.8318	upregulated	8	2.64748	0.0708	upregulated	6	3.52958	0.0293	downregulated	10	4.90268	0.0074	upregulated	17	6.45386	0.0016	upregulated	8	3.71758	0.0243
response to muscle stretch	GO	3 out of 6	10.1673					downregulated	2	5.15206	0.0058	downregulated	3	1.56672	0.2087	downregulated	2	3.44854	0.0318
ERBB2 signaling pathway	GO	4 out of 6	10.1655	upregulated	2	0.66106	0.5163	upregulated	1	0.886455	0.4121	downregulated	2	5.48694	0.0041	downregulated	3	1.61653	0.1986	upregulated	3	2.83338	0.0588	upregulated	2	1.77618	0.1693
regulation of pri-miRNA transcription by RNA polymerase II	GO	6 out of 6	10.1615	downregulated	3	2.50873	0.0814	downregulated	1	1.60629	0.2006	downregulated	4	1.4139	0.2432	downregulated	2	1.73907	0.1757	upregulated	5	1.4252	0.2405	upregulated	2	1.46827	0.2303
endolysosome	GO	2 out of 6	10.1383					upregulated	1	3.38957	0.0337	downregulated	2	2.76842	0.0628	downregulated	6	14.5264	4.9e-07	downregulated	2	3.76692	0.0231
digestive tract morphogenesis	GO	6 out of 6	10.1141	downregulated	3	1.82866	0.1606	downregulated	1	1.26483	0.2823	downregulated	2	0.992382	0.3707	downregulated	1	0.228304	0.7959	upregulated	7	3.12631	0.0439	upregulated	4	2.67359	0.069
negative regulation of epithelial cell apoptotic process	GO	5 out of 6	10.1104	downregulated	1	0.479945	0.6188	upregulated	2	0.930471	0.3944	downregulated	2	0.402024	0.669	downregulated	3	3.46657	0.0312	upregulated	5	2.09418	0.1232	upregulated	3	4.59817	0.0101
female sex differentiation	GO	5 out of 6	10.0927	downregulated	5	2.27889	0.1024	upregulated	2	1.45551	0.2333	downregulated	6	3.23075	0.0395	downregulated	4	1.32629	0.2655	upregulated	8	3.36671	0.0345	upregulated	2	1.3456	0.2604
laminin binding	GO	3 out of 6	10.0707	upregulated	1	0.264614	0.7675					downregulated	2	5.62926	0.0036	downregulated	3	4.85253	0.0078	upregulated	2	1.28697	0.2761	downregulated	1	1.43342	0.2385
chemoattractant activity	GO	4 out of 6	10.0598	downregulated	1	3.61566	0.0269	downregulated	1	1.16032	0.3134	downregulated	2	3.61566	0.0269					downregulated	1	1.26382	0.2826	upregulated	3	2.93197	0.0533
regulation of cytokine biosynthetic process	GO	4 out of 6	10.0433	downregulated	1	0.936486	0.392	upregulated	4	8.1205	0.0003	downregulated	10	4.11067	0.0164	downregulated	9	12.6394	3.2e-06	downregulated	3	0.528429	0.5895	upregulated	3	1.00565	0.3658
regulation of amyloid-beta clearance	GO	4 out of 6	10.0056					upregulated	1	1.07838	0.3401	downregulated	1	0.598749	0.5495	downregulated	1	3.72511	0.0241	upregulated	3	5.47558	0.0042	upregulated	1	1.28452	0.2768
regulation of transcription regulatory region DNA binding	GO	5 out of 6	9.96849	downregulated	1	0.806199	0.4466	upregulated	2	2.65005	0.0706	downregulated	3	3.50452	0.0301	downregulated	4	2.96549	0.0515	upregulated	5	2.53972	0.0789	upregulated	3	2.8026	0.0607
cell morphogenesis involved in neuron differentiation	GO	5 out of 6	9.95185	upregulated	26	9.45995	7.8e-05	downregulated	8	1.6274	0.1964	downregulated	34	8.71008	0.0002	downregulated	21	3.32616	0.0359	upregulated	33	4.21656	0.0147	upregulated	15	1.5316	0.2162
negative regulation of intrinsic apoptotic signaling pathway in response to DNA damage	GO	3 out of 6	9.90202	upregulated	2	0.754149	0.4704	upregulated	3	3.30019	0.0369	downregulated	1	2.26298	0.104	downregulated	4	8.821	0.0001	upregulated	2	2.87237	0.0566
sequestering of metal ion	GO	2 out of 6	9.84052									downregulated	2	8.48542	0.0002					upregulated	1	1.3551	0.2579
regulation of I-kappaB kinase/NF-kappaB signaling	GO	5 out of 6	9.79692	downregulated	5	0.415649	0.6599	upregulated	11	6.47006	0.0015	downregulated	17	4.89998	0.0074	downregulated	13	3.03489	0.0481	upregulated	20	3.55599	0.0286	upregulated	15	4.36048	0.0128
14-3-3 protein binding	GO	4 out of 6	9.7842	downregulated	4	6.24775	0.0019					downregulated	1	1.00243	0.367	downregulated	2	2.3148	0.0988	upregulated	1	0.219226	0.8031
cell adhesion molecule binding	GO	3 out of 6	9.76704	upregulated	15	0.660364	0.5167	upregulated	16	1.14391	0.3186	downregulated	42	6.21114	0.002	downregulated	29	5.14738	0.0058	downregulated	18	2.22512	0.1081	upregulated	21	2.43792	0.0873
neurotransmitter transport	GO	4 out of 6	9.71571	upregulated	13	10.0457	4.3e-05	upregulated	2	0.874164	0.4172	downregulated	10	6.3983	0.0017	downregulated	7	5.67889	0.0034	upregulated	13	3.78397	0.0227	upregulated	9	4.77439	0.0084
regulation of sprouting angiogenesis	GO	4 out of 6	9.70129	downregulated	5	6.65067	0.0013	upregulated	1	0.0908984	0.9131	downregulated	6	3.59397	0.0275	downregulated	3	2.4924	0.0827	upregulated	3	3.19787	0.0408	downregulated	2	6.14272	0.0021
positive regulation of double-strand break repair	GO	4 out of 6	9.69082	upregulated	1	1.35966	0.2567	upregulated	1	0.69954	0.4968	downregulated	3	1.85525	0.1564	downregulated	3	3.9578	0.0191	upregulated	2	3.00412	0.0496	upregulated	2	2.93285	0.0532
positive regulation of execution phase of apoptosis	GO	4 out of 6	9.68258									downregulated	3	3.96076	0.019	downregulated	1	1.11812	0.3269	upregulated	2	3.28839	0.0373	upregulated	1	1.3153	0.2684
response to pH	GO	4 out of 6	9.61791	downregulated	1	5.8089	0.003	upregulated	1	1.84783	0.1576	downregulated	2	2.33112	0.0972	downregulated	1	4.01812	0.018	downregulated	2	3.80954	0.0222	upregulated	2	3.11714	0.0443
cyclin-dependent protein kinase activity	GO	5 out of 6	9.61709	upregulated	4	1.72472	0.1782	downregulated	3	5.55838	0.0039	downregulated	4	3.02085	0.0488	downregulated	1	0.388608	0.678	upregulated	3	1.13067	0.3228	upregulated	2	1.2433	0.2884
ubiquitin-like modifier activating enzyme activity	GO	3 out of 6	9.60504					downregulated	1	1.60867	0.2002									upregulated	1	2.95493	0.0521	upregulated	2	5.04143	0.0065
ectoderm development	GO	4 out of 6	9.60441									downregulated	4	5.28378	0.0051	downregulated	1	0.743638	0.4754	upregulated	2	1.50626	0.2217	upregulated	1	2.07073	0.1261
azurophil granule lumen	GO	3 out of 6	9.55725	upregulated	1	0.234034	0.7913	upregulated	6	2.72787	0.0654	downregulated	13	7.56765	0.0005	downregulated	9	8.97239	0.0001	downregulated	6	5.18206	0.0056	upregulated	2	1.16117	0.3131
cell-cell junction organization	GO	5 out of 6	9.53882	upregulated	7	5.60522	0.0037	downregulated	1	3.47627	0.0309	downregulated	12	5.03191	0.0065	downregulated	3	1.49585	0.2241	upregulated	6	2.87342	0.0565	upregulated	3	2.26659	0.1037
nuclear transport	GO	4 out of 6	9.52861	downregulated	4	0.213085	0.8081	upregulated	17	4.05466	0.0173	upregulated	9	1.43374	0.2384	downregulated	16	3.97898	0.0187	upregulated	30	5.58144	0.0038	upregulated	16	5.2435	0.0053
protein C-terminus binding	GO	4 out of 6	9.52432	upregulated	11	1.58274	0.2054	upregulated	9	2.42623	0.0884	downregulated	15	2.72273	0.0657	downregulated	9	1.43767	0.2375	upregulated	15	4.58182	0.0102	upregulated	11	2.36484	0.094
neurotransmitter receptor transport to postsynaptic membrane	GO	3 out of 6	9.50033	upregulated	3	4.54044	0.0107	downregulated	2	4.3893	0.0124									upregulated	2	4.58414	0.0102	upregulated	2	5.06733	0.0063
specific granule lumen	GO	4 out of 6	9.49863	upregulated	3	1.69494	0.1836	upregulated	1	0.744801	0.4748	downregulated	4	2.05395	0.1282	downregulated	4	4.34455	0.013	upregulated	2	3.12504	0.0439	upregulated	1	2.41484	0.0894
regulation of mitochondrial depolarization	GO	4 out of 6	9.498	downregulated	2	2.60906	0.0736	upregulated	1	1.90524	0.1488	downregulated	4	6.2831	0.0019	downregulated	1	2.12549	0.1194	upregulated	1	2.01731	0.133	downregulated	1	1.63171	0.1956
ERBB signaling pathway	GO	5 out of 6	9.47038	downregulated	4	1.70301	0.1821	upregulated	2	1.09387	0.3349	downregulated	6	3.89073	0.0204	downregulated	6	2.00662	0.1344	upregulated	5	2.1541	0.116	upregulated	2	0.809777	0.445
carbohydrate binding	GO	4 out of 6	9.42934	downregulated	6	1.54606	0.2131	upregulated	10	2.04918	0.1288	downregulated	17	5.92209	0.0027	downregulated	11	4.4052	0.0122	downregulated	5	3.96184	0.019	upregulated	5	3.56701	0.0282
inflammasome complex	GO	5 out of 6	9.42415	downregulated	1	1.53335	0.2158					downregulated	2	1.94008	0.1437	downregulated	2	3.90407	0.0202	upregulated	1	0.896325	0.4081	upregulated	1	1.15032	0.3165
establishment of organelle localization	GO	4 out of 6	9.4083	upregulated	22	4.98726	0.0068	downregulated	5	1.75632	0.1727	downregulated	31	8.58247	0.0002	downregulated	20	4.91294	0.0074	downregulated	13	1.41858	0.2421	upregulated	9	0.562407	0.5698
intermediate filament	GO	2 out of 6	9.40328	downregulated	2	0.938055	0.3914	downregulated	1	1.02395	0.3592	upregulated	2	1.64129	0.1937	upregulated	3	2.50164	0.082	upregulated	5	3.66729	0.0255	upregulated	5	5.73599	0.0032
cell cortex region	GO	3 out of 6	9.38275	upregulated	1	4.51823	0.0109	upregulated	1	0.614485	0.5409	downregulated	8	9.7303	5.9e-05	downregulated	5	4.33075	0.0132	downregulated	2	2.38958	0.0917	upregulated	1	0.454416	0.6348
microvillus	GO	2 out of 6	9.33738	downregulated	2	3.69967	0.0247	upregulated	2	1.24111	0.2891	downregulated	10	6.01307	0.0024	downregulated	7	9.59909	6.8e-05	upregulated	7	4.98964	0.0068	upregulated	5	4.34774	0.0129
asymmetric cell division	GO	5 out of 6	9.3252	upregulated	1	0.593916	0.5522	downregulated	1	4.38326	0.0125	downregulated	1	1.11692	0.3273	downregulated	2	2.13526	0.1182	upregulated	2	1.1999	0.3012	upregulated	1	1.08377	0.3383
semaphorin-plexin signaling pathway involved in axon guidance	GO	4 out of 6	9.26344	downregulated	1	2.72177	0.0658					downregulated	3	2.81046	0.0602					upregulated	2	1.77299	0.1698	upregulated	1	1.95821	0.1411
regulation of histone H3-K9 acetylation	GO	4 out of 6	9.25299	downregulated	1	2.83185	0.0589	upregulated	1	1.69576	0.1835	downregulated	2	2.02397	0.1321					upregulated	4	4.89649	0.0075	upregulated	1	1.19643	0.3023
muscle organ development	GO	4 out of 6	9.25157	upregulated	14	4.91526	0.0073	upregulated	8	1.74608	0.1745	downregulated	24	4.7271	0.0089	downregulated	11	1.94029	0.1437	upregulated	24	3.82394	0.0218	upregulated	13	3.67549	0.0253
establishment of protein localization to postsynaptic membrane	GO	3 out of 6	9.24091	upregulated	3	4.42681	0.012	downregulated	2	4.31055	0.0134									upregulated	2	4.43786	0.0118	upregulated	2	4.9193	0.0073
telencephalon development	GO	2 out of 6	9.21512	upregulated	7	0.783143	0.457	upregulated	8	4.63975	0.0097	upregulated	13	7.02668	0.0009	downregulated	11	3.71597	0.0243	upregulated	23	10.0365	4.4e-05	upregulated	18	11.6281	8.9e-06
male sex differentiation	GO	5 out of 6	9.2117	downregulated	4	1.35368	0.2583	upregulated	7	6.23306	0.002	downregulated	10	5.11013	0.006	downregulated	9	2.39371	0.0913	upregulated	13	3.51688	0.0297	upregulated	7	3.07036	0.0464
positive regulation of CD4-positive, alpha-beta T cell activation	GO	4 out of 6	9.20627	downregulated	1	0.76584	0.4649					downregulated	5	4.87139	0.0077	downregulated	2	3.36333	0.0346	upregulated	3	1.46354	0.2314	downregulated	1	1.25784	0.2843
protein localization to plasma membrane	GO	4 out of 6	9.18433	upregulated	14	8.12717	0.0003	upregulated	5	2.61294	0.0733	downregulated	16	4.8634	0.0077	downregulated	6	2.895	0.0553	upregulated	13	6.16249	0.0021	upregulated	8	6.00356	0.0025
regulation of CD4-positive, alpha-beta T cell activation	GO	5 out of 6	9.1836	downregulated	1	0.374049	0.6879					downregulated	5	2.60829	0.0737	downregulated	2	2.27493	0.1028	upregulated	4	1.77709	0.1691	upregulated	3	2.14924	0.1166
regulation of inflammatory response	GO	2 out of 6	9.18267	upregulated	6	1.25524	0.285	upregulated	13	4.41765	0.0121	downregulated	21	4.64552	0.0096	downregulated	24	13.8033	1e-06	downregulated	13	1.32807	0.265	downregulated	9	2.26518	0.1038
development of primary sexual characteristics	GO	5 out of 6	9.12212	downregulated	4	2.87808	0.0562	upregulated	7	5.40396	0.0045	downregulated	12	3.71867	0.0243	downregulated	12	2.92128	0.0539	upregulated	17	3.47383	0.031	upregulated	6	1.53422	0.2156
gonad development	GO	5 out of 6	9.12054	downregulated	4	2.93951	0.0529	upregulated	7	5.48885	0.0041	downregulated	11	3.86469	0.021	downregulated	11	2.4813	0.0836	upregulated	17	3.75797	0.0233	upregulated	6	1.56591	0.2089
SMAD binding	GO	4 out of 6	9.06968	downregulated	4	4.24347	0.0144	upregulated	2	0.738441	0.4779	upregulated	4	1.2882	0.2758	downregulated	3	0.919415	0.3988	upregulated	9	3.70879	0.0245	upregulated	3	2.22464	0.1081
neuron maturation	GO	2 out of 6	9.00374	upregulated	1	0.833725	0.4344					downregulated	6	7.20132	0.0007	downregulated	4	7.02204	0.0009	downregulated	2	1.15559	0.3149	downregulated	2	3.23029	0.0395
RNAi effector complex	GO	4 out of 6	8.9947					upregulated	1	1.52519	0.2176	downregulated	3	2.02024	0.1326	downregulated	3	3.76491	0.0232	upregulated	2	1.74664	0.1744	upregulated	2	2.98809	0.0504
epithelial cell apoptotic process	GO	5 out of 6	8.98639					downregulated	1	3.75757	0.0233	downregulated	4	2.01901	0.1328	downregulated	2	1.62458	0.197	upregulated	3	0.95926	0.3832	upregulated	1	0.625974	0.5347
apoptotic signaling pathway	GO	5 out of 6	8.98636	downregulated	9	2.98238	0.0507	upregulated	7	6.80679	0.0011	downregulated	20	4.68601	0.0092	downregulated	14	3.56253	0.0284	upregulated	20	1.24753	0.2872	upregulated	14	3.3147	0.0363
cytokinetic process	GO	3 out of 6	8.90342	downregulated	1	1.65786	0.1905					downregulated	3	4.50042	0.0111	downregulated	2	2.74514	0.0642
regulation of neutrophil migration	GO	2 out of 6	8.87904					upregulated	1	0.86054	0.4229	downregulated	6	7.20132	0.0007	downregulated	5	5.89694	0.0027	downregulated	2	1.98242	0.1377	downregulated	1	1.37626	0.2525
cellular response to toxic substance	GO	4 out of 6	8.87586	downregulated	8	5.19253	0.0056	upregulated	13	6.62204	0.0013	downregulated	19	7.17982	0.0008	downregulated	12	6.07794	0.0023	upregulated	13	3.117	0.0443	downregulated	4	6.06939	0.0023
hydrolase activity, acting on carbon-nitrogen (but not peptide) bonds	GO	4 out of 6	8.87389	upregulated	7	3.66738	0.0255	upregulated	7	3.68171	0.0252	downregulated	13	3.33056	0.0358	downregulated	5	1.87621	0.1532	upregulated	12	5.72607	0.0033	upregulated	7	5.29015	0.005
phosphatidylinositol-3-phosphate biosynthetic process	GO	4 out of 6	8.86847	upregulated	5	3.07926	0.046	downregulated	2	1.11472	0.328	downregulated	5	7.00247	0.0009	downregulated	3	2.8788	0.0562	downregulated	2	1.16213	0.3128	upregulated	2	2.11387	0.1208
protein-containing complex scaffold activity	GO	3 out of 6	8.86825	upregulated	8	3.61155	0.027	upregulated	5	3.77093	0.023	downregulated	10	7.54092	0.0005	upregulated	1	1.49467	0.2243	upregulated	12	5.85328	0.0029	upregulated	7	4.35119	0.0129
azurophil granule membrane	GO	3 out of 6	8.8516	upregulated	1	1.47773	0.2282	upregulated	5	4.32016	0.0133	downregulated	6	4.85709	0.0078	downregulated	8	10.6852	2.3e-05	downregulated	2	2.12084	0.1199	upregulated	1	1.22804	0.2929
negative regulation of cilium assembly	GO	5 out of 6	8.82366	upregulated	2	3.31674	0.0363	downregulated	1	3.26862	0.0381	downregulated	4	4.56488	0.0104	downregulated	2	2.2349	0.107	upregulated	1	0.757756	0.4687	upregulated	1	1.31425	0.2687
PcG protein complex	GO	5 out of 6	8.81404	downregulated	1	3.55339	0.0286	upregulated	3	4.31592	0.0134	downregulated	4	1.26538	0.2821	downregulated	1	0.367258	0.6926	upregulated	7	3.67836	0.0253	upregulated	5	4.26556	0.014
maintenance of cell polarity	GO	3 out of 6	8.78794									downregulated	2	3.79041	0.0226	upregulated	1	4.14385	0.0159	upregulated	3	4.05341	0.0174	upregulated	1	0.944113	0.389
enteroendocrine cell differentiation	GO	3 out of 6	8.76911	upregulated	1	1.92653	0.1457					downregulated	2	2.73841	0.0647	upregulated	1	2.61145	0.0734	upregulated	3	4.92241	0.0073	upregulated	3	5.64628	0.0035
regulation of interleukin-8 secretion	GO	4 out of 6	8.76844					upregulated	1	2.34565	0.0958	downregulated	2	1.29294	0.2745	downregulated	3	7.68067	0.0005	upregulated	2	0.872262	0.418	upregulated	1	1.26822	0.2813
hair follicle morphogenesis	GO	4 out of 6	8.75644	downregulated	2	1.94448	0.1431	downregulated	1	4.31148	0.0134	downregulated	3	2.22348	0.1082					upregulated	1	0.277011	0.758
dorsal/ventral axis specification	GO	2 out of 6	8.74118									upregulated	1	1.17392	0.3092					upregulated	2	4.52232	0.0109	upregulated	2	5.39278	0.0045
regulation of lymphocyte migration	GO	3 out of 6	8.70839									downregulated	5	2.04879	0.1289	downregulated	3	3.09677	0.0452	downregulated	1	0.597461	0.5502	upregulated	5	4.16029	0.0156
collagen-activated tyrosine kinase receptor signaling pathway	GO	3 out of 6	8.68632									downregulated	2	3.62197	0.0267	downregulated	1	3.86049	0.0211	upregulated	1	1.20386	0.3
sex differentiation	GO	5 out of 6	8.63085	downregulated	6	2.46737	0.0848	upregulated	8	4.81125	0.0081	downregulated	14	2.8215	0.0595	downregulated	12	1.66649	0.1889	upregulated	20	3.49121	0.0305	upregulated	9	2.99554	0.05
leukocyte chemotaxis	GO	3 out of 6	8.59701	upregulated	1	1.13295	0.3221	upregulated	5	4.1928	0.0151	downregulated	11	7.36539	0.0006	downregulated	7	6.44477	0.0016	upregulated	7	0.334949	0.7154	downregulated	1	0.222358	0.8006
nuclear pore	GO	2 out of 6	8.57977	upregulated	5	1.96293	0.1404	downregulated	2	1.88247	0.1522	upregulated	2	0.386137	0.6797	downregulated	5	1.46038	0.2321	upregulated	9	2.76376	0.0631	upregulated	8	5.81601	0.003
cerebral cortex development	GO	4 out of 6	8.57963	upregulated	3	0.839943	0.4317	upregulated	6	6.1683	0.0021	downregulated	8	3.97101	0.0189	downregulated	6	3.75367	0.0234	upregulated	9	3.66185	0.0257	upregulated	7	4.20133	0.015
plasma membrane tubulation	GO	2 out of 6	8.57782	downregulated	2	5.11126	0.006					downregulated	3	3.46656	0.0312
positive regulation of ATP biosynthetic process	GO	4 out of 6	8.56463	upregulated	2	3.18315	0.0415					downregulated	4	3.60539	0.0272	downregulated	2	2.50913	0.0813	upregulated	5	4.01315	0.0181	upregulated	2	1.6201	0.1979
negative regulation of intrinsic apoptotic signaling pathway in response to DNA damage by p53 class mediator	GO	3 out of 6	8.55412	upregulated	2	1.64122	0.1937	upregulated	3	3.96048	0.0191	downregulated	1	2.92929	0.0534	downregulated	3	7.0526	0.0009	upregulated	2	4.17393	0.0154
regulation of sequestering of calcium ion	GO	4 out of 6	8.53361	upregulated	5	1.93546	0.1444	downregulated	2	2.96665	0.0515	downregulated	8	4.31139	0.0134	downregulated	4	1.46449	0.2312	upregulated	8	4.88376	0.0076	downregulated	5	3.15722	0.0425
regulation of ATP metabolic process	GO	5 out of 6	8.5071	upregulated	5	2.43838	0.0873	downregulated	2	4.19264	0.0151	downregulated	4	1.56501	0.2091	downregulated	2	1.3057	0.271	upregulated	6	2.49773	0.0823	upregulated	3	1.3844	0.2505
centriole replication	GO	4 out of 6	8.49205									downregulated	4	2.67949	0.0686	downregulated	2	1.68535	0.1854	upregulated	1	2.45006	0.0863	upregulated	1	1.67716	0.1869
response to redox state	GO	2 out of 6	8.46157					downregulated	1	4.99735	0.0068	downregulated	2	3.46423	0.0313
intestinal lipid absorption	GO	4 out of 6	8.45742									downregulated	1	0.846421	0.4289	downregulated	2	4.13516	0.016	upregulated	1	1.95284	0.1419	upregulated	1	1.523	0.2181
ear morphogenesis	GO	3 out of 6	8.43265	upregulated	4	1.6927	0.184	downregulated	2	1.32779	0.2651	upregulated	6	2.29647	0.1006					upregulated	8	4.23826	0.0144	upregulated	7	5.16306	0.0057
clathrin coat	GO	5 out of 6	8.41161	downregulated	3	3.02576	0.0485	downregulated	3	2.3543	0.095	downregulated	5	2.84116	0.0584	upregulated	1	2.42533	0.0884	upregulated	2	0.86228	0.4222	upregulated	2	1.75343	0.1732
RNA polymerase II core promoter sequence-specific DNA binding	GO	3 out of 6	8.40971					upregulated	1	0.838384	0.4324	downregulated	1	1.64113	0.1938	downregulated	3	3.52794	0.0294	upregulated	1	2.6177	0.073	upregulated	1	3.10245	0.0449
regulation of G-protein coupled receptor protein signaling pathway	GO	4 out of 6	8.40483	downregulated	3	2.82665	0.0592	upregulated	3	2.91337	0.0543	downregulated	8	3.50704	0.03	downregulated	8	4.81278	0.0081	upregulated	10	2.21971	0.1086	downregulated	3	2.04799	0.129
positive regulation of transcription regulatory region DNA binding	GO	4 out of 6	8.38848	downregulated	1	1.50748	0.2215	upregulated	1	1.60449	0.201	downregulated	2	4.35572	0.0128	downregulated	2	3.8103	0.0221	upregulated	3	2.30869	0.0994	downregulated	1	1.98922	0.1368
positive regulation of nitric oxide metabolic process	GO	3 out of 6	8.38508	downregulated	1	2.67212	0.0691	upregulated	1	3.0119	0.0492	downregulated	6	9.08244	0.0001	downregulated	6	9.82914	5.4e-05	downregulated	4	6.13715	0.0022	downregulated	2	4.04958	0.0174
regulation of myoblast proliferation	GO	4 out of 6	8.38224					downregulated	1	2.75485	0.0636	downregulated	1	2.16113	0.1152	downregulated	1	2.40584	0.0902	upregulated	1	1.06041	0.3463
antigen processing and presentation of endogenous antigen	GO	2 out of 6	8.30392	upregulated	1	0.721747	0.4859					downregulated	3	4.37459	0.0126	downregulated	2	4.65109	0.0096
nuclear migration	GO	3 out of 6	8.30291					upregulated	3	5.11592	0.006	downregulated	6	9.37531	8.5e-05	downregulated	2	3.03572	0.048	upregulated	2	1.00781	0.365
flavin adenine dinucleotide binding	GO	5 out of 6	8.29164	downregulated	1	0.387986	0.6784	downregulated	3	4.72071	0.0089	downregulated	5	1.68509	0.1854	downregulated	3	3.2816	0.0376	downregulated	7	5.50484	0.0041	upregulated	4	3.72109	0.0242
transferase activity, transferring acyl groups other than amino-acyl groups	GO	4 out of 6	8.23303	upregulated	10	0.801356	0.4487	upregulated	12	3.3302	0.0358	downregulated	13	3.16242	0.0423	downregulated	9	2.00156	0.1351	upregulated	20	5.53749	0.0039	upregulated	8	1.66312	0.1895
regulation of signal transduction by p53 class mediator	GO	4 out of 6	8.23302	downregulated	2	3.276	0.0378	upregulated	6	4.56879	0.0104	downregulated	14	5.47716	0.0042	downregulated	8	4.20638	0.0149	upregulated	7	2.47957	0.0838	downregulated	4	2.6373	0.0716
peptide-lysine-N-acetyltransferase activity	GO	4 out of 6	8.22965	upregulated	3	0.385946	0.6798	upregulated	5	3.25796	0.0385	downregulated	4	0.465889	0.6276	downregulated	2	0.298354	0.742	upregulated	11	7.905	0.0004	upregulated	5	3.20432	0.0406
water transmembrane transporter activity	GO	2 out of 6	8.22582	upregulated	1	0.776522	0.46													upregulated	1	4.19816	0.015	upregulated	1	4.02766	0.0178
carbohydrate derivative catabolic process	GO	3 out of 6	8.19663	downregulated	4	0.851337	0.4268	upregulated	9	2.70049	0.0672	upregulated	4	1.26827	0.2813	downregulated	10	6.67535	0.0013	upregulated	16	4.63869	0.0097	downregulated	7	4.53233	0.0108
positive regulation of neuron migration	GO	3 out of 6	8.16587									downregulated	3	4.36899	0.0127	downregulated	1	1.24249	0.2887	upregulated	2	2.55439	0.0777
protein localization to vacuole	GO	3 out of 6	8.16211	upregulated	4	3.64554	0.0261	upregulated	2	2.08937	0.1238	downregulated	5	2.41576	0.0893	downregulated	8	7.3814	0.0006	upregulated	6	4.09986	0.0166	upregulated	3	2.38321	0.0923
positive regulation of pri-miRNA transcription by RNA polymerase II	GO	5 out of 6	8.16081	downregulated	2	2.16831	0.1144					downregulated	3	1.27468	0.2795	downregulated	1	1.18809	0.3048	upregulated	4	1.69767	0.1831	upregulated	1	1.83205	0.1601
RNA polymerase II transcription factor complex	GO	3 out of 6	8.15274	downregulated	9	5.16078	0.0057	upregulated	6	1.67922	0.1865	upregulated	6	1.16658	0.3114	upregulated	2	2.87967	0.0562	upregulated	22	4.96688	0.007	upregulated	13	3.75056	0.0235
regulation of epidermis development	GO	5 out of 6	8.12664	downregulated	2	2.46379	0.0851	upregulated	2	1.22491	0.2938	downregulated	7	0.894823	0.4087	downregulated	3	0.58012	0.5598	upregulated	10	3.32293	0.036	upregulated	5	2.08989	0.1237
hydrolase activity, acting on carbon-nitrogen (but not peptide) bonds, in cyclic amidines	GO	5 out of 6	8.11119	downregulated	1	1.19104	0.3039	upregulated	2	1.73616	0.1762	downregulated	3	4.89983	0.0074	downregulated	1	0.882383	0.4138	upregulated	2	1.99252	0.1364	upregulated	1	0.881577	0.4141
mismatch repair complex	GO	4 out of 6	8.10684									downregulated	1	2.16113	0.1152	downregulated	1	1.37782	0.2521	upregulated	1	1.07107	0.3426	upregulated	2	3.49682	0.0303
cell-cell signaling involved in cardiac conduction	GO	4 out of 6	8.09202	upregulated	2	2.94574	0.0526	downregulated	2	4.1904	0.0151	upregulated	2	1.85187	0.1569	downregulated	1	1.95199	0.142	upregulated	1	2.48153	0.0836	upregulated	2	4.26572	0.014
positive regulation of signal transduction by p53 class mediator	GO	4 out of 6	8.07273	downregulated	1	2.75102	0.0639					downregulated	3	3.18749	0.0413	downregulated	1	2.26804	0.1035	downregulated	1	0.777075	0.4597	upregulated	1	0.643254	0.5256
regulation of intrinsic apoptotic signaling pathway in response to DNA damage by p53 class mediator	GO	3 out of 6	8.07179	upregulated	2	1.53761	0.2149	upregulated	3	3.89215	0.0204	downregulated	1	2.80772	0.0603	downregulated	3	6.79771	0.0011	upregulated	2	3.89613	0.0203
AP-type membrane coat adaptor complex	GO	4 out of 6	8.05696	downregulated	3	3.14064	0.0433	downregulated	2	1.76294	0.1715	downregulated	5	2.94464	0.0526	downregulated	1	0.208747	0.8116	upregulated	2	0.89834	0.4072	upregulated	2	1.82795	0.1607
exopeptidase activity	GO	3 out of 6	8.0569	upregulated	2	1.00849	0.3648	upregulated	5	1.10796	0.3302	downregulated	9	3.55764	0.0285	downregulated	8	5.81893	0.003	upregulated	2	1.72963	0.1773	downregulated	2	0.932853	0.3934
organic acid transmembrane transport	GO	3 out of 6	8.056	upregulated	8	2.30245	0.1	upregulated	3	1.92174	0.1464	downregulated	15	5.17431	0.0057	downregulated	7	3.72656	0.0241	upregulated	13	4.27227	0.014	upregulated	8	4.28136	0.0138
carboxylic acid transmembrane transport	GO	3 out of 6	8.056	upregulated	8	2.30245	0.1	upregulated	3	1.92174	0.1464	downregulated	15	5.17431	0.0057	downregulated	7	3.72656	0.0241	upregulated	13	4.27227	0.014	upregulated	8	4.28136	0.0138
complement activation, classical pathway	GO	3 out of 6	8.04828	downregulated	3	2.62554	0.0724					downregulated	2	0.618713	0.5386	downregulated	3	6.76083	0.0012	downregulated	1	1.29651	0.2735	downregulated	1	0.660298	0.5167
positive regulation of chromosome organization	GO	4 out of 6	8.04727	upregulated	11	2.53116	0.0796	upregulated	9	3.83248	0.0217	downregulated	15	3.09533	0.0453	downregulated	13	5.28727	0.0051	upregulated	18	3.5713	0.0281	upregulated	8	2.45701	0.0857
semi-lunar valve development	GO	4 out of 6	8.04395	upregulated	3	2.98276	0.0507	upregulated	1	0.913092	0.4013	downregulated	2	1.35903	0.2569	downregulated	4	4.98763	0.0068	upregulated	4	2.24011	0.1064	upregulated	2	3.35304	0.035
embryo implantation	GO	4 out of 6	8.0393	downregulated	3	8.56552	0.0002	downregulated	2	2.93624	0.0531	downregulated	2	2.68704	0.0681	downregulated	1	1.8957	0.1502	downregulated	5	4.1108	0.0164	downregulated	3	3.93441	0.0196
positive regulation of adherens junction organization	GO	3 out of 6	8.03659	downregulated	2	4.61201	0.0099	upregulated	1	0.800398	0.4491	downregulated	4	3.42576	0.0325	upregulated	1	2.00878	0.1342	upregulated	5	4.13116	0.0161	downregulated	1	1.32315	0.2663
axis specification	GO	5 out of 6	8.0212	upregulated	5	2.10984	0.1213	downregulated	1	0.960665	0.3826	downregulated	5	1.94233	0.1434	downregulated	1	0.188716	0.828	upregulated	7	2.93195	0.0533	upregulated	4	4.10738	0.0165
protein localization to cell periphery	GO	4 out of 6	8.02052	upregulated	17	9.31521	9e-05	upregulated	7	4.19533	0.0151	downregulated	20	5.86612	0.0028	downregulated	8	2.74992	0.0639	upregulated	14	6.34785	0.0018	upregulated	9	6.56716	0.0014
muscle contraction	GO	4 out of 6	8.00826	upregulated	13	5.22716	0.0054	downregulated	4	2.07169	0.126	downregulated	14	3.138	0.0434	upregulated	3	2.55526	0.0777	upregulated	16	5.48305	0.0042	upregulated	7	5.09793	0.0061
post-Golgi vesicle-mediated transport	GO	4 out of 6	7.99817	upregulated	7	2.84267	0.0583	downregulated	2	0.958751	0.3834	upregulated	3	1.22936	0.2925	downregulated	8	4.83974	0.0079	upregulated	9	4.13007	0.0161	upregulated	4	2.14164	0.1175
bone trabecula morphogenesis	GO	4 out of 6	7.98953	downregulated	1	1.69729	0.1832					downregulated	2	3.05356	0.0472					upregulated	1	1.57511	0.207	upregulated	1	1.66357	0.1895
cellular response to sterol	GO	3 out of 6	7.95538	upregulated	1	1.78279	0.1682									downregulated	1	1.27599	0.2792	upregulated	2	5.68124	0.0034	upregulated	2	2.78095	0.062
receptor localization to synapse	GO	4 out of 6	7.95448	upregulated	4	2.71182	0.0664	downregulated	3	3.98166	0.0187	downregulated	2	1.26505	0.2822					upregulated	2	2.49124	0.0828	upregulated	2	2.92836	0.0535
regulation of neuron death	GO	4 out of 6	7.95167	upregulated	13	2.44819	0.0865	upregulated	5	3.06306	0.0467	downregulated	18	4.02387	0.0179	downregulated	10	2.57126	0.0764	upregulated	21	3.7848	0.0227	upregulated	13	3.08299	0.0458
regulation of release of sequestered calcium ion into cytosol	GO	5 out of 6	7.93073	downregulated	2	1.32588	0.2656	downregulated	1	2.70311	0.067	downregulated	4	1.99785	0.1356	downregulated	2	0.925877	0.3962	upregulated	4	4.6729	0.0093	downregulated	3	3.69488	0.0249
mitotic cell cycle arrest	GO	4 out of 6	7.92816	upregulated	1	0.532666	0.587					downregulated	2	3.38069	0.034	downregulated	1	0.767071	0.4644	upregulated	3	3.22494	0.0398	upregulated	1	1.08813	0.3368
protein activation cascade	GO	4 out of 6	7.92706	downregulated	3	1.66018	0.1901	downregulated	1	0.470476	0.6247	downregulated	4	1.38377	0.2506	downregulated	3	5.61763	0.0036	downregulated	1	0.809382	0.4451	downregulated	1	0.395616	0.6733
neuronal stem cell division	GO	4 out of 6	7.91968					downregulated	1	1.84398	0.1582	downregulated	2	4.65103	0.0096	upregulated	1	2.13869	0.1178	upregulated	1	1.03774	0.3543	upregulated	2	2.52562	0.08
signaling adaptor activity	GO	4 out of 6	7.90724	upregulated	4	2.28876	0.1014	upregulated	2	0.361599	0.6966	downregulated	8	3.79447	0.0225	downregulated	3	0.463561	0.629	upregulated	11	4.27777	0.0139	upregulated	4	2.0218	0.1324
defense response to Gram-negative bacterium	GO	4 out of 6	7.90121	downregulated	2	1.07888	0.34	upregulated	2	2.36916	0.0936	downregulated	4	4.17137	0.0154	downregulated	4	4.97216	0.0069	upregulated	2	3.27824	0.0377	downregulated	3	3.23028	0.0395
regulation of hematopoietic stem cell differentiation	GO	5 out of 6	7.90106	downregulated	2	2.34411	0.0959	upregulated	2	2.21545	0.1091	downregulated	4	2.70107	0.0671	downregulated	1	0.363908	0.695	upregulated	6	3.14566	0.043	upregulated	3	1.56176	0.2098
detection of light stimulus	GO	4 out of 6	7.86495	downregulated	2	2.35436	0.095	downregulated	1	1.58193	0.2056	downregulated	3	2.17889	0.1132	downregulated	2	2.02729	0.1317	downregulated	1	0.277519	0.7577
positive regulation of neutrophil migration	GO	2 out of 6	7.83485					upregulated	1	0.976983	0.3764	downregulated	5	6.26562	0.0019	downregulated	3	6.22514	0.002	downregulated	2	2.18371	0.1126	downregulated	1	1.49522	0.2242
complement activation	GO	3 out of 6	7.82799	downregulated	3	2.1927	0.1116					downregulated	3	1.04207	0.3527	downregulated	3	6.21647	0.002	downregulated	1	1.07283	0.342	downregulated	1	0.550411	0.5767
development of primary male sexual characteristics	GO	5 out of 6	7.82413	downregulated	3	1.50323	0.2224	upregulated	6	6.69028	0.0012	downregulated	10	5.58557	0.0038	downregulated	9	3.11533	0.0444	upregulated	11	2.86952	0.0567	upregulated	5	1.44076	0.2367
negative regulation of ATP biosynthetic process	GO	3 out of 6	7.75223	downregulated	1	1.2918	0.2748	downregulated	1	5.68899	0.0034	downregulated	1	0.771439	0.4623
negative regulation of pri-miRNA transcription by RNA polymerase II	GO	6 out of 6	7.71526	downregulated	1	1.3399	0.2619	downregulated	1	2.78604	0.0617	downregulated	2	1.50301	0.2225	downregulated	1	1.10053	0.3327	upregulated	1	0.4077	0.6652	upregulated	1	0.578091	0.561
embryonic heart tube development	GO	5 out of 6	7.6977	upregulated	8	6.37707	0.0017	downregulated	3	5.79742	0.003	downregulated	4	2.86227	0.0571	downregulated	3	2.01387	0.1335	upregulated	5	1.84066	0.1587	upregulated	2	1.56054	0.21
positive regulation of vascular endothelial cell proliferation	GO	5 out of 6	7.6445	downregulated	1	1.0435	0.3522	downregulated	1	1.86215	0.1553	downregulated	2	2.22702	0.1078					upregulated	1	0.709723	0.4918	upregulated	1	1.8021	0.165
positive regulation of cell cycle G1/S phase transition	GO	4 out of 6	7.64286	downregulated	1	0.47758	0.6203	downregulated	1	2.05118	0.1286	upregulated	1	1.05914	0.3468	upregulated	1	1.1376	0.3206	upregulated	5	2.34136	0.0962	upregulated	5	4.96948	0.0069
hindbrain morphogenesis	GO	4 out of 6	7.64032					upregulated	1	0.64862	0.5228	downregulated	4	2.34636	0.0957	downregulated	1	0.62516	0.5352	upregulated	5	3.77117	0.023	upregulated	1	1.54626	0.213
disordered domain specific binding	GO	3 out of 6	7.62761					upregulated	1	0.237608	0.7885	downregulated	6	2.40516	0.0903	downregulated	5	3.76652	0.0231	upregulated	3	1.97773	0.1384	upregulated	1	1.69354	0.1839
neuron recognition	GO	5 out of 6	7.61995	upregulated	3	3.12445	0.044	downregulated	1	0.973977	0.3776	downregulated	2	3.07031	0.0464	downregulated	2	2.08523	0.1243	upregulated	3	2.32548	0.0977	upregulated	2	2.28941	0.1013
cerebellar cortex morphogenesis	GO	4 out of 6	7.60868					upregulated	1	0.847814	0.4284	downregulated	3	2.33949	0.0964	downregulated	1	0.805845	0.4467	upregulated	4	3.49425	0.0304	upregulated	1	1.81691	0.1625
vascular smooth muscle cell differentiation	GO	4 out of 6	7.58397	downregulated	2	4.54274	0.0106	upregulated	1	1.73587	0.1762	downregulated	1	0.426992	0.6525					upregulated	1	2.16497	0.1148	upregulated	1	2.18513	0.1125
tissue remodeling	GO	4 out of 6	7.58098	upregulated	4	3.13071	0.0437	upregulated	3	1.67887	0.1866	downregulated	5	2.62631	0.0723	downregulated	4	2.57181	0.0764	upregulated	7	3.311	0.0365	upregulated	5	3.88142	0.0206
extrinsic apoptotic signaling pathway	GO	5 out of 6	7.55907	downregulated	2	0.365106	0.6941	upregulated	2	4.49575	0.0112	downregulated	4	6.18815	0.0021	downregulated	4	1.90173	0.1493	upregulated	7	1.47633	0.2285	upregulated	6	2.1235	0.1196
germ cell development	GO	3 out of 6	7.50054	upregulated	10	1.13215	0.3223	downregulated	3	3.70543	0.0246	upregulated	9	3.94498	0.0194	downregulated	14	6.34017	0.0018	upregulated	7	2.53207	0.0795	upregulated	5	2.78371	0.0618
oxygen transport	GO	2 out of 6	7.49643	downregulated	1	1.90087	0.1494					downregulated	1	5.59556	0.0037
GABAergic neuron differentiation	GO	2 out of 6	7.46631									downregulated	1	4.2402	0.0144	downregulated	1	3.22611	0.0397
positive regulation of ATP metabolic process	GO	4 out of 6	7.44934	upregulated	2	3.06368	0.0467					downregulated	4	3.09405	0.0453	downregulated	2	2.30249	0.1	upregulated	5	3.72352	0.0241	upregulated	2	1.39297	0.2483
regulation of vasculogenesis	GO	4 out of 6	7.41896	upregulated	1	1.04409	0.352					downregulated	2	2.88317	0.056	downregulated	1	1.74171	0.1752	upregulated	1	1.9092	0.1482	upregulated	1	1.92897	0.1453
neurotransmitter transporter activity	GO	2 out of 6	7.41842	upregulated	2	4.2684	0.014	upregulated	1	1.97071	0.1394	upregulated	1	6.42073	0.0016	downregulated	1	1.74976	0.1738	upregulated	6	3.00293	0.0496	upregulated	4	4.41549	0.0121
cytokine binding	GO	4 out of 6	7.41331	downregulated	4	1.9936	0.1362	upregulated	4	2.15071	0.1164	downregulated	9	4.64156	0.0096	downregulated	4	2.81862	0.0597	downregulated	5	0.946788	0.388	upregulated	3	1.05702	0.3475
positive regulation of intrinsic apoptotic signaling pathway	GO	4 out of 6	7.349	downregulated	3	1.88933	0.1512	upregulated	2	2.15031	0.1164	downregulated	7	8.18974	0.0003	downregulated	2	0.626499	0.5345	downregulated	4	2.11273	0.1209	upregulated	1	0.906468	0.4039
molting cycle	GO	4 out of 6	7.34408	upregulated	3	1.11067	0.3293	downregulated	2	3.13652	0.0434	downregulated	9	4.19823	0.015	downregulated	6	2.87181	0.0566	upregulated	3	1.58208	0.2055	downregulated	1	3.33389	0.0357
hair cycle	GO	4 out of 6	7.34408	upregulated	3	1.11067	0.3293	downregulated	2	3.13652	0.0434	downregulated	9	4.19823	0.015	downregulated	6	2.87181	0.0566	upregulated	3	1.58208	0.2055	downregulated	1	3.33389	0.0357
somatic diversification of immunoglobulins	GO	5 out of 6	7.34346	downregulated	1	0.583245	0.5581					downregulated	2	1.41023	0.2441	downregulated	3	2.30202	0.1001	upregulated	2	1.52099	0.2185	upregulated	2	1.52697	0.2172
regulation of developmental pigmentation	GO	3 out of 6	7.32279	downregulated	2	2.36135	0.0943					downregulated	2	2.36935	0.0935					upregulated	1	2.5921	0.0749
regulation of extracellular matrix organization	GO	4 out of 6	7.25665	downregulated	3	3.09171	0.0454	upregulated	1	0.366894	0.6929	downregulated	6	5.80644	0.003	downregulated	2	0.750321	0.4722	upregulated	3	0.798558	0.45	downregulated	2	2.82348	0.0594
regulation of protein localization to cell surface	GO	4 out of 6	7.22046	downregulated	1	0.958782	0.3834	downregulated	1	2.13907	0.1178	upregulated	1	0.319429	0.7266	upregulated	1	2.16461	0.1148	upregulated	4	2.79614	0.061	upregulated	4	3.81051	0.0221
regulation of phospholipid metabolic process	GO	4 out of 6	7.2082	upregulated	2	2.20582	0.1102	upregulated	5	5.22628	0.0054	downregulated	9	4.78515	0.0084	downregulated	5	4.7487	0.0087	upregulated	8	3.03808	0.0479	upregulated	4	2.06837	0.1264
photoreceptor cell differentiation	GO	4 out of 6	7.14326	upregulated	2	3.76387	0.0232	upregulated	2	2.38266	0.0923	downregulated	4	1.80121	0.1651	downregulated	1	0.26332	0.7685	upregulated	3	5.44565	0.0043	upregulated	3	5.7796	0.0031
cerebellum morphogenesis	GO	4 out of 6	7.13818					upregulated	1	0.700765	0.4962	downregulated	4	2.65211	0.0705	downregulated	1	0.698636	0.4973	upregulated	4	2.8798	0.0561	upregulated	1	1.60839	0.2002
heme binding	GO	4 out of 6	7.13082	downregulated	5	3.09214	0.0454	upregulated	4	1.53565	0.2153	downregulated	9	4.98258	0.0069	downregulated	5	3.90902	0.0201	upregulated	8	1.01959	0.3607	downregulated	6	4.33686	0.0131
phosphatidylinositol-3,5-bisphosphate 3-phosphatase activity	GO	4 out of 6	7.12738	upregulated	1	0.890173	0.4106					downregulated	2	3.30216	0.0368	downregulated	1	1.12759	0.3238	upregulated	1	1.49306	0.2247	upregulated	1	2.09474	0.1231
CD8-positive, alpha-beta T cell activation	GO	2 out of 6	7.07863	upregulated	1	1.68806	0.1849					downregulated	2	2.89689	0.0552	downregulated	2	5.8698	0.0028
carbohydrate derivative transport	GO	5 out of 6	7.06548	downregulated	2	1.12191	0.3257	downregulated	2	2.78228	0.0619	downregulated	5	2.77562	0.0623	downregulated	4	3.58376	0.0278	downregulated	2	4.86787	0.0077	upregulated	1	1.6698	0.1883
reflex	GO	4 out of 6	7.05626					downregulated	1	1.2602	0.2836	downregulated	1	0.260223	0.7709					upregulated	2	2.91817	0.054	upregulated	1	2.61766	0.073
regulation of endoplasmic reticulum stress-induced intrinsic apoptotic signaling pathway	GO	4 out of 6	7.03087	upregulated	1	0.542784	0.5811	downregulated	2	2.2942	0.1008	downregulated	1	2.76842	0.0628					upregulated	3	1.68185	0.186	upregulated	1	0.829184	0.4364
positive regulation of reactive oxygen species biosynthetic process	GO	3 out of 6	7.02944	downregulated	1	2.45967	0.0855	upregulated	1	2.82142	0.0595	downregulated	6	8.68797	0.0002	downregulated	6	8.87128	0.0001	downregulated	5	5.88475	0.0028	downregulated	3	4.28331	0.0138
positive regulation of sprouting angiogenesis	GO	4 out of 6	7.00988	downregulated	2	4.15321	0.0157					downregulated	4	3.62743	0.0266	downregulated	1	3.0871	0.0456	upregulated	2	3.70962	0.0245	downregulated	2	7.56748	0.0005
regulation of vascular endothelial growth factor signaling pathway	GO	2 out of 6	7.00344									downregulated	2	4.24305	0.0144					upregulated	1	2.76039	0.0633
dendritic cell migration	GO	3 out of 6	7.00262					downregulated	1	4.75278	0.0086	downregulated	3	2.48758	0.0831					upregulated	1	1.23456	0.291	downregulated	1	1.4723	0.2294
cytolysis	GO	3 out of 6	6.9914									downregulated	2	2.84847	0.0579	downregulated	1	2.2474	0.1057	upregulated	1	1.89553	0.1502
myofibril assembly	GO	4 out of 6	6.9812	upregulated	2	2.4723	0.0844	downregulated	1	0.716317	0.4885	downregulated	5	4.37864	0.0125	downregulated	2	3.43822	0.0321	upregulated	4	1.66679	0.1889	upregulated	1	0.920311	0.3984
regulation of action potential	GO	5 out of 6	6.98069	upregulated	5	6.56293	0.0014	downregulated	1	2.98092	0.0507	downregulated	5	2.10998	0.1212	downregulated	1	1.30755	0.2705	upregulated	5	4.68753	0.0092	upregulated	3	2.45764	0.0856
negative regulation of ERBB signaling pathway	GO	4 out of 6	6.92859	upregulated	1	0.896464	0.408	downregulated	2	3.5672	0.0282	downregulated	3	1.60449	0.201	downregulated	4	2.1209	0.1199	downregulated	3	1.63012	0.1959	upregulated	3	2.16258	0.115
clathrin-dependent endocytosis	GO	4 out of 6	6.91237	downregulated	1	2.01041	0.1339	downregulated	1	1.19915	0.3015	downregulated	2	4.33736	0.0131					downregulated	1	1.40255	0.246	upregulated	1	0.768004	0.4639
regulation of T cell migration	GO	3 out of 6	6.91148									downregulated	4	2.1453	0.117	downregulated	3	3.74649	0.0236	downregulated	1	0.793347	0.4523	upregulated	2	1.81304	0.1632
MLL1/2 complex	GO	4 out of 6	6.90494	upregulated	2	0.973401	0.3778					downregulated	2	0.541042	0.5821	downregulated	3	2.42113	0.0888	upregulated	3	1.08234	0.3388	upregulated	3	3.83383	0.0216
glycerolipid metabolic process	GO	4 out of 6	6.89778	downregulated	7	3.3094	0.0365	downregulated	6	0.928732	0.3951	downregulated	29	8.29226	0.0003	downregulated	17	3.60253	0.0273	upregulated	17	0.547125	0.5786	downregulated	3	1.49001	0.2254
RNA polymerase I activity	GO	3 out of 6	6.89765	downregulated	1	1.50241	0.2226	downregulated	2	3.82036	0.0219	downregulated	1	1.57488	0.207
regulation of clathrin-dependent endocytosis	GO	5 out of 6	6.88377	upregulated	4	4.7521	0.0086	downregulated	1	1.21565	0.2965	downregulated	2	2.14364	0.1172	downregulated	1	0.697952	0.4976	upregulated	2	1.95746	0.1412	upregulated	3	5.62117	0.0036
sister chromatid cohesion	GO	4 out of 6	6.87176	downregulated	1	2.73175	0.0651	upregulated	2	1.85148	0.157	downregulated	3	0.531269	0.5879	downregulated	1	0.547578	0.5783	upregulated	7	4.91264	0.0074	downregulated	1	1.91281	0.1477
lipoprotein particle binding	GO	4 out of 6	6.84849					downregulated	1	0.78323	0.4569	upregulated	1	4.48965	0.0112	downregulated	3	3.00497	0.0495	upregulated	2	5.27634	0.0051	upregulated	1	2.27359	0.1029
polyol metabolic process	GO	3 out of 6	6.8425	downregulated	4	4.66815	0.0094	upregulated	2	1.99457	0.1361	downregulated	9	6.89577	0.001	downregulated	5	3.76264	0.0232	downregulated	4	2.60963	0.0736	downregulated	5	3.87985	0.0207
deaminase activity	GO	5 out of 6	6.84179	downregulated	1	1.40256	0.246	upregulated	3	3.83974	0.0215	downregulated	2	5.122	0.006	downregulated	1	1.07745	0.3405	upregulated	2	2.10353	0.122	upregulated	1	0.975997	0.3768
TRAPP complex	GO	4 out of 6	6.83186					downregulated	1	1.68089	0.1862	downregulated	1	1.68173	0.1861	downregulated	1	1.99121	0.1365					upregulated	1	1.47802	0.2281
regulation of intracellular transport	GO	4 out of 6	6.80886	upregulated	21	3.384	0.0339	downregulated	4	1.95655	0.1413	downregulated	28	3.47368	0.031	downregulated	23	5.25475	0.0052	downregulated	19	3.75083	0.0235	upregulated	18	3.25872	0.0384
tetrapyrrole binding	GO	4 out of 6	6.80379	downregulated	5	2.9146	0.0542	upregulated	4	1.49065	0.2252	downregulated	9	4.83863	0.0079	downregulated	6	3.71516	0.0244	upregulated	8	0.941227	0.3901	downregulated	6	4.11517	0.0163
neurotransmitter receptor internalization	GO	2 out of 6	6.79998									downregulated	3	3.65064	0.026	downregulated	2	3.14934	0.0429
response to salt	GO	3 out of 6	6.78993	upregulated	1	1.2534	0.2855	downregulated	1	3.52707	0.0294	downregulated	2	3.07389	0.0462					upregulated	1	1.44239	0.2364
anterior/posterior axis specification	GO	4 out of 6	6.76802	upregulated	2	1.091	0.3359					downregulated	3	1.92614	0.1457	downregulated	1	0.506411	0.6027	upregulated	5	3.35727	0.0348	upregulated	2	2.0692	0.1263
virion binding	GO	1 out of 6	6.76302	downregulated	3	7.69882	0.0005													downregulated	1	0.935801	0.3923
viral life cycle	GO	3 out of 6	6.76282	upregulated	7	1.50499	0.222	upregulated	9	2.94383	0.0527	downregulated	13	5.09572	0.0061	downregulated	11	5.91476	0.0027	downregulated	8	2.15471	0.1159	upregulated	6	2.35586	0.0948
regulation of amyloid-beta formation	GO	3 out of 6	6.76252					upregulated	1	0.774303	0.461	downregulated	2	1.07067	0.3428	downregulated	1	0.857688	0.4241	upregulated	4	5.60847	0.0037	upregulated	2	3.23427	0.0394
calmodulin binding	GO	2 out of 6	6.73216	upregulated	7	4.45174	0.0117	downregulated	2	1.66911	0.1884	downregulated	20	3.19693	0.0409	downregulated	10	3.38833	0.0338	upregulated	18	5.15459	0.0058	upregulated	8	1.57757	0.2065
regulation of ceramide biosynthetic process	GO	3 out of 6	6.71914					upregulated	1	0.952224	0.3859	upregulated	1	2.11476	0.1207	downregulated	1	1.24194	0.2888	upregulated	2	4.29757	0.0136	upregulated	1	4.24661	0.0143
negative regulation of mitotic sister chromatid separation	GO	3 out of 6	6.71732	upregulated	2	3.13284	0.0436					downregulated	3	3.17808	0.0417	downregulated	4	6.27422	0.0019					upregulated	1	0.397847	0.6718
regulation of non-canonical Wnt signaling pathway	GO	4 out of 6	6.70692	downregulated	1	3.04712	0.0475					downregulated	2	1.72781	0.1777					upregulated	1	0.549753	0.5771	upregulated	1	1.38225	0.251
estrogen metabolic process	GO	3 out of 6	6.69489					upregulated	1	1.0469	0.351	downregulated	3	1.683	0.1858	downregulated	3	4.67153	0.0094	upregulated	1	1.38727	0.2498
negative regulation of cellular senescence	GO	3 out of 6	6.6712					upregulated	1	0.659439	0.5171	downregulated	1	0.418495	0.658					upregulated	2	3.89613	0.0203	upregulated	1	3.01602	0.049
cellular extravasation	GO	4 out of 6	6.671					upregulated	1	3.45688	0.0315	downregulated	2	2.386	0.092	downregulated	2	5.16999	0.0057	upregulated	4	2.18517	0.1125	upregulated	1	0.38672	0.6793
dystrophin-associated glycoprotein complex	GO	4 out of 6	6.66792	upregulated	2	1.22604	0.2935	upregulated	1	1.37682	0.2524	downregulated	2	0.870935	0.4186	downregulated	1	1.3731	0.2533	upregulated	3	3.62335	0.0267	upregulated	2	3.40339	0.0333
interleukin-12-mediated signaling pathway	GO	3 out of 6	6.6583	upregulated	3	2.32264	0.098	downregulated	1	3.69316	0.0249	downregulated	7	3.15215	0.0428	downregulated	4	4.6157	0.0099	downregulated	2	1.81772	0.1624	downregulated	1	0.66235	0.5156
negative regulation of intrinsic apoptotic signaling pathway by p53 class mediator	GO	3 out of 6	6.64683	upregulated	3	2.25201	0.1052	upregulated	3	3.62434	0.0267	downregulated	1	2.60358	0.074	downregulated	3	6.37085	0.0017	upregulated	2	3.54874	0.0288
retina development in camera-type eye	GO	4 out of 6	6.62657	upregulated	10	5.4455	0.0043	upregulated	5	2.35291	0.0951	downregulated	9	2.778	0.0622	downregulated	6	1.30888	0.2701	upregulated	12	5.61247	0.0037	upregulated	6	4.72563	0.0089
microtubule end	GO	3 out of 6	6.58555									downregulated	4	3.65352	0.0259	downregulated	3	2.90005	0.055	upregulated	1	1.33825	0.2623	downregulated	1	1.30627	0.2708
positive regulation of STAT cascade	GO	4 out of 6	6.56316	downregulated	3	2.60165	0.0742	downregulated	1	2.68551	0.0682	upregulated	1	0.660543	0.5166	downregulated	3	0.755997	0.4695	downregulated	1	0.0805172	0.9226	upregulated	1	1.26107	0.2834
neuronal cell body	GO	4 out of 6	6.54101	upregulated	25	5.95831	0.0026	downregulated	9	3.1561	0.0426	downregulated	39	7.41319	0.0006	downregulated	17	3.85131	0.0213	downregulated	22	4.23696	0.0145	upregulated	14	2.31569	0.0987
extrinsic apoptotic signaling pathway in absence of ligand	GO	3 out of 6	6.53321	downregulated	2	1.61251	0.1994					downregulated	2	5.79806	0.003	downregulated	1	0.319393	0.7266	downregulated	1	0.400358	0.6701	downregulated	1	0.796392	0.451
keratinocyte differentiation	GO	4 out of 6	6.52747	downregulated	4	1.38958	0.2492	downregulated	4	2.70403	0.0669	upregulated	2	1.28205	0.2775	upregulated	2	1.10688	0.3306	upregulated	6	2.49764	0.0823	upregulated	5	2.32514	0.0978
attachment of spindle microtubules to kinetochore	GO	4 out of 6	6.4955	upregulated	1	1.18482	0.3058	upregulated	2	1.94234	0.1434	downregulated	5	4.55279	0.0105	downregulated	2	2.89559	0.0553	upregulated	2	1.38464	0.2504	upregulated	1	0.789632	0.454
Ras guanyl-nucleotide exchange factor activity	GO	2 out of 6	6.49267	upregulated	21	3.78456	0.0227	upregulated	8	1.07343	0.3418	downregulated	28	10.7809	2.1e-05	downregulated	19	5.03191	0.0065	upregulated	16	2.39747	0.0909	upregulated	15	4.09521	0.0167
cell communication involved in cardiac conduction	GO	4 out of 6	6.47095	upregulated	2	2.13202	0.1186	downregulated	2	3.72928	0.024	upregulated	3	2.24959	0.1054	downregulated	1	1.52129	0.2184	upregulated	2	2.09703	0.1228	upregulated	2	3.50497	0.03
cardiac conduction	GO	4 out of 6	6.45721	upregulated	3	2.93975	0.0529	downregulated	2	3.21291	0.0402	upregulated	3	1.35653	0.2576	downregulated	1	1.14704	0.3176	upregulated	5	3.27001	0.038	upregulated	3	3.12352	0.044
natural killer cell activation	GO	4 out of 6	6.39694	downregulated	1	0.911967	0.4017	upregulated	2	0.956467	0.3842	upregulated	3	1.84597	0.1579	downregulated	2	4.11239	0.0164	upregulated	3	0.215372	0.8062	upregulated	1	2.11367	0.1208
nucleotide-binding domain, leucine rich repeat containing receptor signaling pathway	GO	4 out of 6	6.39573	upregulated	1	0.908993	0.4029	upregulated	1	0.598244	0.5498	downregulated	2	0.750393	0.4722	downregulated	1	0.794722	0.4517	upregulated	4	2.5367	0.0791	upregulated	3	3.82115	0.0219
connexin complex	GO	2 out of 6	6.3846	downregulated	1	1.46743	0.2305	upregulated	1	5.01384	0.0066	downregulated	1	0.767028	0.4644	downregulated	1	2.80958	0.0602	upregulated	1	3.3646	0.0346	upregulated	1	3.02	0.0488
prenyltransferase activity	GO	2 out of 6	6.38141					downregulated	1	1.32422	0.266	upregulated	3	6.06155	0.0023	downregulated	3	6.7046	0.0012	upregulated	3	3.79189	0.0226	upregulated	1	2.58952	0.0751
segment specification	GO	4 out of 6	6.37695	upregulated	1	0.998685	0.3684	upregulated	1	2.35145	0.0952	downregulated	2	2.47591	0.0841	downregulated	2	4.4312	0.0119	upregulated	1	1.23504	0.2908	upregulated	1	1.58493	0.205
extracellular matrix structural constituent conferring tensile strength	GO	3 out of 6	6.36883					downregulated	1	1.72278	0.1786	downregulated	3	2.46395	0.0851					upregulated	3	2.1821	0.1128
positive regulation of cation transmembrane transport	GO	4 out of 6	6.3446	upregulated	7	4.34178	0.013	downregulated	1	2.31896	0.0984	downregulated	8	5.87309	0.0028	downregulated	3	2.85642	0.0575	upregulated	8	2.47938	0.0838	downregulated	3	2.84146	0.0583
nucleus organization	GO	4 out of 6	6.32121	downregulated	2	1.60979	0.1999	upregulated	7	1.29946	0.2727	downregulated	10	0.708888	0.4922	downregulated	10	3.26638	0.0381	upregulated	5	0.371629	0.6896	upregulated	5	2.03561	0.1306
lipid droplet	GO	2 out of 6	6.30078	downregulated	1	1.57771	0.2064	upregulated	5	5.14938	0.0058	downregulated	4	4.44614	0.0117	downregulated	5	2.88478	0.0559	upregulated	8	2.74629	0.0642	upregulated	5	3.55449	0.0286
insulin-like growth factor binding	GO	2 out of 6	6.25476	downregulated	1	1.68768	0.1849	upregulated	1	2.68614	0.0681	downregulated	1	1.2803	0.278	downregulated	2	4.42077	0.012	upregulated	1	3.15247	0.0427	upregulated	1	3.10229	0.0449
digestive tract development	GO	4 out of 6	6.23331	downregulated	5	2.40535	0.0902	upregulated	3	4.65388	0.0095	downregulated	9	1.70586	0.1816	upregulated	1	1.18588	0.3055	upregulated	16	4.20791	0.0149	upregulated	9	3.75395	0.0234
protein heterodimerization activity	GO	4 out of 6	6.23207	downregulated	12	2.23452	0.107	upregulated	25	11.3206	1.2e-05	downregulated	41	6.57051	0.0014	downregulated	32	8.9987	0.0001	upregulated	37	3.05305	0.0472	downregulated	14	3.3041	0.0367
ficolin-1-rich granule lumen	GO	3 out of 6	6.21654	downregulated	1	1.59193	0.2035	upregulated	4	1.13804	0.3204	downregulated	10	4.91469	0.0073	downregulated	9	7.12309	0.0008	downregulated	11	7.41316	0.0006	upregulated	5	0.991457	0.371
regulation of autophagosome maturation	GO	3 out of 6	6.1932													downregulated	1	1.22357	0.2942	upregulated	1	2.3495	0.0954	upregulated	1	2.62013	0.0728
bundle of His cell to Purkinje myocyte communication	GO	4 out of 6	6.18431	upregulated	1	2.15716	0.1157					downregulated	1	1.32927	0.2647	downregulated	1	3.00084	0.0497	upregulated	1	1.38538	0.2502	upregulated	1	2.62599	0.0724
positive regulation of glutamate receptor signaling pathway	GO	2 out of 6	6.16643																	upregulated	3	3.24492	0.039	upregulated	2	2.92151	0.0539
negative regulation of transcription regulatory region DNA binding	GO	4 out of 6	6.14856	upregulated	1	0.822563	0.4393	upregulated	1	3.38957	0.0337	downregulated	1	1.62402	0.1971	downregulated	2	1.74217	0.1751	upregulated	2	3.47944	0.0308	upregulated	2	3.51506	0.0297
regulation of stem cell population maintenance	GO	4 out of 6	6.13973	upregulated	2	0.855262	0.4252	downregulated	2	1.96189	0.1406	downregulated	4	1.20552	0.2995	downregulated	3	2.14127	0.1175	upregulated	3	1.68631	0.1852
calcium ion transmembrane import into cytosol	GO	4 out of 6	6.12147	upregulated	3	2.53554	0.0792	downregulated	1	2.92749	0.0535	downregulated	4	2.6649	0.0696	downregulated	3	1.95362	0.1418	upregulated	5	3.76939	0.0231	downregulated	3	2.6584	0.0701
transferase activity, transferring acyl groups	GO	4 out of 6	6.12067	upregulated	11	0.750617	0.4721	upregulated	13	3.21039	0.0403	downregulated	15	3.19771	0.0409	downregulated	9	1.47915	0.2278	upregulated	20	3.85211	0.0212	upregulated	9	1.5527	0.2117
positive regulation of myoblast fusion	GO	3 out of 6	6.10148					upregulated	1	0.743832	0.4753	downregulated	1	1.92744	0.1455	downregulated	1	3.01385	0.0491	downregulated	1	0.823459	0.4389	upregulated	1	1.90402	0.149
regulation of gene expression, epigenetic	GO	5 out of 6	6.06626	downregulated	6	2.61191	0.0734	upregulated	14	8.59635	0.0002	downregulated	27	4.52286	0.0109	downregulated	13	2.65284	0.0705	upregulated	20	2.31464	0.0988	upregulated	12	2.56036	0.0773
interleukin-2-mediated signaling pathway	GO	2 out of 6	6.0393									downregulated	1	2.27308	0.103	downregulated	1	3.76622	0.0231
positive regulation of p38MAPK cascade	GO	3 out of 6	6.02993	downregulated	1	3.86866	0.0209	downregulated	1	1.37627	0.2525	upregulated	1	0.985162	0.3734					upregulated	1	1.77017	0.1703
regulation of miRNA metabolic process	GO	2 out of 6	5.9868					upregulated	1	2.18494	0.1125	downregulated	4	5.26006	0.0052	downregulated	2	2.91168	0.0544
regulation of establishment of cell polarity	GO	3 out of 6	5.98016	downregulated	1	1.43542	0.238					downregulated	3	1.7314	0.177					upregulated	3	2.81334	0.06
positive regulation of response to DNA damage stimulus	GO	3 out of 6	5.96916	upregulated	6	2.80186	0.0607	upregulated	5	2.30584	0.0997	downregulated	7	1.877	0.153	downregulated	10	8.45006	0.0002	upregulated	7	1.59117	0.2037	upregulated	3	1.03563	0.355
cell division site	GO	4 out of 6	5.96052	upregulated	6	2.27733	0.1026	upregulated	5	1.95608	0.1414	downregulated	5	3.80458	0.0223	downregulated	4	3.10139	0.045	upregulated	4	0.99472	0.3698	upregulated	3	2.29324	0.1009
cis-Golgi network	GO	2 out of 6	5.95438					upregulated	1	2.10356	0.122	downregulated	8	5.56024	0.0038	upregulated	2	2.98572	0.0505	upregulated	3	3.79531	0.0225	upregulated	2	2.15907	0.1154
lamin binding	GO	2 out of 6	5.94747					upregulated	2	3.58992	0.0276	downregulated	1	1.33102	0.2642	upregulated	2	4.45343	0.0116	upregulated	2	2.84447	0.0582	upregulated	2	3.10299	0.0449
regulation of cellular response to insulin stimulus	GO	3 out of 6	5.93516	downregulated	6	5.91985	0.0027	downregulated	1	0.248565	0.7799	upregulated	1	0.118467	0.8883					upregulated	4	1.76782	0.1707	downregulated	3	1.88261	0.1522
positive regulation of reactive oxygen species metabolic process	GO	3 out of 6	5.93049	downregulated	1	1.87482	0.1534	upregulated	2	2.18973	0.1119	downregulated	9	7.3688	0.0006	downregulated	8	6.91797	0.001	downregulated	6	4.63471	0.0097	downregulated	4	3.40666	0.0332
nuclear transcriptional repressor complex	GO	3 out of 6	5.92132	upregulated	1	0.236641	0.7893	upregulated	2	1.36149	0.2563	downregulated	1	0.644998	0.5247					upregulated	4	3.53276	0.0292	upregulated	3	3.3417	0.0354
mammary gland lobule development	GO	2 out of 6	5.89684	downregulated	1	3.82826	0.0217													downregulated	1	0.84332	0.4303	upregulated	1	2.9119	0.0544
positive regulation of neuron death	GO	4 out of 6	5.87898	downregulated	1	0.213517	0.8077	downregulated	2	3.03516	0.0481	downregulated	5	1.86844	0.1544	downregulated	4	3.10609	0.0448	downregulated	2	0.85789	0.4241	upregulated	5	1.54883	0.2125
endoderm development	GO	3 out of 6	5.87456	upregulated	1	1.09506	0.3345	upregulated	1	0.681151	0.506	downregulated	5	3.49705	0.0303	downregulated	4	3.23521	0.0394	downregulated	2	2.51274	0.081	upregulated	5	3.43126	0.0323
neuronal stem cell population maintenance	GO	4 out of 6	5.87219	downregulated	2	1.70671	0.1815	upregulated	1	0.429701	0.6507	downregulated	2	1.12785	0.3237	upregulated	1	1.63214	0.1955	upregulated	4	2.97223	0.0512	upregulated	2	2.12725	0.1192
cofactor transport	GO	4 out of 6	5.86942	upregulated	3	1.42741	0.2399	downregulated	1	0.5894	0.5547	downregulated	4	5.17109	0.0057	downregulated	1	1.38445	0.2505	downregulated	1	1.74106	0.1753	upregulated	3	1.89295	0.1506
cellular response to decreased oxygen levels	GO	3 out of 6	5.8683	downregulated	9	9.12464	0.0001	upregulated	7	1.42841	0.2397	downregulated	12	1.7947	0.1662	downregulated	5	1.46299	0.2315	downregulated	4	2.35842	0.0946	downregulated	4	2.7272	0.0654
regulation of translation	GO	2 out of 6	5.86727	upregulated	15	0.545738	0.5794	upregulated	21	6.68247	0.0013	upregulated	14	2.54727	0.0783	downregulated	20	3.58786	0.0277	upregulated	25	2.6934	0.0677	upregulated	16	3.17387	0.0418
positive regulation of G1/S transition of mitotic cell cycle	GO	4 out of 6	5.8667	downregulated	1	0.581792	0.5589	downregulated	1	2.29813	0.1004	upregulated	1	1.19647	0.3023	upregulated	1	1.27759	0.2787	upregulated	3	1.04552	0.3515	upregulated	4	4.41532	0.0121
protein K11-linked deubiquitination	GO	3 out of 6	5.86646	downregulated	1	2.73308	0.065	upregulated	1	1.09176	0.3356	downregulated	1	2.00483	0.1347	downregulated	1	2.22031	0.1086
ATPase complex	GO	4 out of 6	5.8618	upregulated	5	0.981017	0.3749	upregulated	5	2.27508	0.1028	downregulated	9	0.943842	0.3891	downregulated	2	0.435458	0.647	upregulated	12	3.5758	0.028	upregulated	8	4.16281	0.0156
vesicle cytoskeletal trafficking	GO	4 out of 6	5.85665	downregulated	2	3.08329	0.0458	upregulated	1	0.292535	0.7464	downregulated	3	1.6513	0.1918	downregulated	1	1.60629	0.2006	downregulated	1	0.756432	0.4693	upregulated	1	0.564738	0.5685
intrinsic apoptotic signaling pathway by p53 class mediator	GO	5 out of 6	5.85662	downregulated	1	2.47374	0.0843	downregulated	1	0.886383	0.4121	upregulated	1	2.8815	0.0561	downregulated	2	1.06603	0.3444	upregulated	5	2.12267	0.1197	upregulated	3	2.1893	0.112
protein tyrosine kinase binding	GO	3 out of 6	5.84807	upregulated	1	0.42591	0.6532	upregulated	3	1.118	0.3269	downregulated	6	2.53993	0.0789	upregulated	1	1.91955	0.1467	upregulated	8	3.67011	0.0255	upregulated	4	3.1015	0.045
determination of heart left/right asymmetry	GO	5 out of 6	5.83139	upregulated	7	5.76321	0.0031	downregulated	2	3.0437	0.0477	downregulated	3	3.39102	0.0337	downregulated	2	1.25902	0.2839	upregulated	4	2.05542	0.128	upregulated	2	1.84545	0.158
Golgi transport complex	GO	2 out of 6	5.8302					downregulated	1	5.1454	0.0058	downregulated	1	0.684802	0.5042
regulation of intrinsic apoptotic signaling pathway by p53 class mediator	GO	3 out of 6	5.82236	upregulated	3	1.94147	0.1435	upregulated	3	3.48434	0.0307	downregulated	1	2.36299	0.0941	downregulated	3	5.86856	0.0028	upregulated	2	3.01661	0.049
myosin binding	GO	3 out of 6	5.82173	downregulated	3	6.2253	0.002	upregulated	1	0.172012	0.842	downregulated	9	4.47444	0.0114	upregulated	1	1.20345	0.3002	upregulated	5	2.04282	0.1297	upregulated	2	0.67994	0.5066
positive regulation of transcription from RNA polymerase II promoter in response to stress	GO	2 out of 6	5.82025	downregulated	3	6.7554	0.0012	upregulated	2	1.53149	0.2162	downregulated	3	2.02717	0.1317	downregulated	3	2.87279	0.0565	downregulated	1	0.770482	0.4628	downregulated	1	1.50597	0.2218
cellular senescence	GO	4 out of 6	5.81894	downregulated	1	0.771086	0.4625	upregulated	1	0.267995	0.7649	downregulated	1	0.137417	0.8716					upregulated	3	2.62605	0.0724	upregulated	2	2.55238	0.0779
carbohydrate biosynthetic process	GO	4 out of 6	5.79305	downregulated	1	4.63381	0.0097	downregulated	3	1.23546	0.2907	upregulated	6	3.84356	0.0214	downregulated	7	3.57714	0.028	downregulated	2	2.17098	0.1141	upregulated	6	2.36116	0.0943
response to water	GO	3 out of 6	5.79028					downregulated	1	2.63044	0.072	upregulated	1	1.86574	0.1548	downregulated	2	3.58895	0.0276	upregulated	1	1.43663	0.2377
passive transmembrane transporter activity	GO	5 out of 6	5.7882	upregulated	24	13.0557	2.1e-06	downregulated	6	1.2015	0.3007	downregulated	26	8.11757	0.0003	downregulated	15	3.00019	0.0498	upregulated	14	2.35219	0.0952	upregulated	6	4.1724	0.0154
TORC1 signaling	GO	4 out of 6	5.78819	downregulated	1	1.44336	0.2361					downregulated	1	1.88815	0.1514	downregulated	1	1.22357	0.2942	upregulated	1	1.23311	0.2914
cardiac muscle cell action potential	GO	5 out of 6	5.76847	upregulated	4	7.51372	0.0005	downregulated	3	5.70272	0.0033	downregulated	1	1.06181	0.3458	downregulated	1	1.44557	0.2356	upregulated	4	1.91793	0.1469	upregulated	2	3.15416	0.0427
signal transduction by p53 class mediator	GO	4 out of 6	5.76366	downregulated	1	1.66193	0.1898	upregulated	5	1.99019	0.1367	downregulated	12	4.45862	0.0116	downregulated	6	2.20759	0.11	upregulated	11	1.05695	0.3475	downregulated	4	1.63125	0.1957
bone resorption	GO	5 out of 6	5.75344	downregulated	1	1.01683	0.3617	upregulated	1	1.2236	0.2942	downregulated	1	1.16989	0.3104	downregulated	1	1.29699	0.2734	upregulated	2	1.33822	0.2623	upregulated	2	2.1551	0.1159
nuclear pore nuclear basket	GO	3 out of 6	5.73536													downregulated	1	1.19715	0.3021	upregulated	2	1.80903	0.1638	upregulated	1	2.72919	0.0653
phospholipase A2 activity (consuming 1,2-dipalmitoylphosphatidylcholine)	GO	3 out of 6	5.67672									downregulated	1	1.53854	0.2147					upregulated	1	1.95824	0.1411	upregulated	1	2.17993	0.113
phospholipase A2 activity consuming 1,2-dioleoylphosphatidylethanolamine)	GO	3 out of 6	5.67672									downregulated	1	1.53854	0.2147					upregulated	1	1.95824	0.1411	upregulated	1	2.17993	0.113
positive regulation of extrinsic apoptotic signaling pathway in absence of ligand	GO	4 out of 6	5.6539	upregulated	1	0.729254	0.4823	upregulated	1	3.18324	0.0415	downregulated	1	1.27562	0.2793	downregulated	1	1.62593	0.1967	upregulated	2	1.19682	0.3022	upregulated	4	5.46802	0.0042
photoreceptor cell development	GO	4 out of 6	5.65015	upregulated	2	4.01839	0.018	downregulated	1	1.55904	0.2103	upregulated	1	0.479936	0.6188	downregulated	1	0.389486	0.6774	upregulated	2	3.82147	0.0219	upregulated	2	4.37848	0.0125
S100 protein binding	GO	3 out of 6	5.64789	downregulated	1	1.56579	0.2089	downregulated	1	1.31611	0.2682	upregulated	1	0.97011	0.379	downregulated	2	3.7361	0.0238
RNA polymerase II repressing transcription factor binding	GO	5 out of 6	5.64612	upregulated	2	1.4258	0.2403	downregulated	1	1.83556	0.1595	downregulated	3	2.64385	0.0711	downregulated	1	0.835979	0.4334	upregulated	3	1.34663	0.2601	upregulated	1	0.40991	0.6637
negative regulation of cysteine-type endopeptidase activity	GO	3 out of 6	5.64594	downregulated	3	2.38331	0.0922	upregulated	2	0.266325	0.7662	downregulated	8	2.71809	0.066	downregulated	8	6.91797	0.001	downregulated	7	2.95375	0.0521	downregulated	2	3.15336	0.0427
chromosome separation	GO	3 out of 6	5.64219					upregulated	1	0.989949	0.3716	downregulated	3	1.331	0.2642	upregulated	1	1.69611	0.1834	upregulated	3	3.46332	0.0313	upregulated	3	3.53392	0.0292
transcriptional activator activity, RNA polymerase II proximal promoter sequence-specific DNA binding	GO	5 out of 6	5.63575	upregulated	11	3.05386	0.0472	downregulated	2	0.849023	0.4278	downregulated	18	1.66553	0.1891	downregulated	10	1.16872	0.3108	upregulated	25	2.65515	0.0703	upregulated	13	2.35119	0.0953
response to mitochondrial depolarisation	GO	4 out of 6	5.6147	downregulated	1	1.30306	0.2717					downregulated	3	1.81018	0.1636	downregulated	2	1.9007	0.1495	upregulated	1	0.600757	0.5484
positive regulation of cell junction assembly	GO	3 out of 6	5.60835	downregulated	2	4.37885	0.0125	upregulated	2	2.56846	0.0767	downregulated	4	2.98326	0.0506	upregulated	1	1.8957	0.1502	upregulated	6	3.88026	0.0206	downregulated	1	1.16985	0.3104
muscle cell proliferation	GO	5 out of 6	5.59952	downregulated	1	1.01683	0.3617					downregulated	1	0.606957	0.545	downregulated	1	1.12694	0.324	upregulated	2	1.84058	0.1587	upregulated	1	1.00822	0.3649
negative regulation of CD4-positive, alpha-beta T cell activation	GO	3 out of 6	5.59927									downregulated	2	0.646463	0.5239					upregulated	1	2.3922	0.0914	upregulated	1	2.56061	0.0773
negative regulation of signal transduction by p53 class mediator	GO	3 out of 6	5.56064	upregulated	3	1.40338	0.2458	upregulated	3	3.2198	0.04	downregulated	3	3.29079	0.0372	downregulated	4	5.69115	0.0034	upregulated	2	2.74044	0.0645	downregulated	1	1.53856	0.2147
oxidoreductase activity, acting on the CH-NH2 group of donors, oxygen as acceptor	GO	2 out of 6	5.55779																	upregulated	2	2.55898	0.0774	upregulated	1	2.99881	0.0498
thyroid hormone receptor binding	GO	3 out of 6	5.52958					upregulated	1	0.704884	0.4942	downregulated	3	0.716968	0.4882	upregulated	2	4.32163	0.0133	upregulated	6	3.34198	0.0354	upregulated	5	6.49714	0.0015
positive regulation of vasculogenesis	GO	2 out of 6	5.52872									downregulated	2	3.51467	0.0298	downregulated	1	2.01406	0.1334
establishment or maintenance of epithelial cell apical/basal polarity	GO	4 out of 6	5.52832	upregulated	2	0.881423	0.4142	downregulated	2	3.847	0.0213	downregulated	2	0.88395	0.4131	upregulated	1	3.03599	0.048	upregulated	6	2.84634	0.0581	upregulated	3	1.86845	0.1544
centrosome cycle	GO	4 out of 6	5.52459	upregulated	3	1.19355	0.3031	upregulated	7	6.03609	0.0024	downregulated	10	4.47432	0.0114	downregulated	7	5.4372	0.0044	upregulated	7	2.27431	0.1029	upregulated	3	0.5684	0.5664
regulation of chromosome separation	GO	3 out of 6	5.52002	upregulated	4	2.32267	0.098	upregulated	3	1.30292	0.2717	downregulated	7	4.21881	0.0147	downregulated	7	6.09135	0.0023	downregulated	3	1.28741	0.276	upregulated	1	0.12286	0.8844
extrinsic component of plasma membrane	GO	4 out of 6	5.51573	upregulated	7	5.96557	0.0026	upregulated	4	4.96349	0.007	downregulated	10	4.89048	0.0075	downregulated	12	5.36083	0.0047	upregulated	7	4.99435	0.0068	upregulated	2	1.19913	0.3015
extrinsic component of cytoplasmic side of plasma membrane	GO	4 out of 6	5.51497	upregulated	5	5.36068	0.0047	upregulated	1	1.59624	0.2027	downregulated	5	2.17389	0.1137	downregulated	9	4.83322	0.008	upregulated	6	3.86018	0.0211	upregulated	2	1.6046	0.201
establishment of protein localization to vacuole	GO	2 out of 6	5.50034	upregulated	3	1.84125	0.1586	upregulated	1	0.927577	0.3955	downregulated	4	2.59835	0.0744	downregulated	6	5.67081	0.0034	upregulated	3	2.14859	0.1166	upregulated	2	1.8452	0.158
regulation of mesoderm development	GO	3 out of 6	5.45881	upregulated	2	2.61909	0.0729	downregulated	1	1.89971	0.1496	upregulated	1	0.943375	0.3893					upregulated	1	1.71922	0.1792	upregulated	2	5.40234	0.0045
hepatocyte apoptotic process	GO	3 out of 6	5.44659					upregulated	1	1.07838	0.3401	downregulated	3	2.93777	0.053	downregulated	2	3.01097	0.0492	upregulated	1	0.576232	0.562
cytoplasmic translational initiation	GO	3 out of 6	5.43727									downregulated	2	1.07646	0.3408	downregulated	2	3.24081	0.0391					upregulated	1	1.12	0.3263
syntaxin binding	GO	4 out of 6	5.42969	upregulated	4	3.77177	0.023	upregulated	3	0.725	0.4843	downregulated	6	0.97299	0.378	downregulated	5	2.63467	0.0717	upregulated	5	4.46755	0.0115	upregulated	3	1.85126	0.157
animal organ formation	GO	4 out of 6	5.41121	upregulated	3	4.26052	0.0141					downregulated	4	6.20184	0.002	downregulated	1	0.805829	0.4467	upregulated	2	1.01778	0.3614	upregulated	1	1.64628	0.1928
mitotic sister chromatid cohesion	GO	4 out of 6	5.39448	downregulated	1	3.62373	0.0267	upregulated	1	2.94466	0.0526	downregulated	3	2.10368	0.122	downregulated	1	1.22709	0.2931	upregulated	2	1.38464	0.2504
regulation of response to DNA damage stimulus	GO	3 out of 6	5.38391	upregulated	14	1.61463	0.199	upregulated	11	2.90297	0.0549	upregulated	7	1.96739	0.1398	downregulated	15	10.0363	4.4e-05	upregulated	14	1.12227	0.3255	upregulated	6	0.710387	0.4915
DNA methylation	GO	2 out of 6	5.35994	downregulated	1	0.658603	0.5176	upregulated	1	0.352286	0.7031	downregulated	3	0.956975	0.3841	downregulated	3	2.2595	0.1044	upregulated	5	2.13505	0.1182	upregulated	3	3.2249	0.0398
regulation of fatty acid transport	GO	3 out of 6	5.35388					downregulated	1	1.02018	0.3605	downregulated	2	2.70827	0.0667	downregulated	3	5.43877	0.0043	downregulated	2	2.15202	0.1162	downregulated	1	1.66134	0.1899
negative regulation of extracellular matrix organization	GO	2 out of 6	5.33983	downregulated	3	6.64478	0.0013					upregulated	1	2.56156	0.0772	downregulated	1	1.25661	0.2846
response to hepatocyte growth factor	GO	3 out of 6	5.31846	downregulated	1	2.28877	0.1014	upregulated	1	2.15853	0.1155	downregulated	4	5.69823	0.0034	downregulated	1	1.50711	0.2215	downregulated	1	2.01712	0.133
negative regulation of execution phase of apoptosis	GO	4 out of 6	5.28957	upregulated	1	3.10546	0.0448					downregulated	2	2.14375	0.1172	downregulated	2	3.02421	0.0486	upregulated	1	1.30641	0.2708	upregulated	1	1.92067	0.1465
molecular adaptor activity	GO	4 out of 6	5.26483	downregulated	7	1.33395	0.2634	upregulated	8	4.11799	0.0163	downregulated	13	2.65806	0.0701	upregulated	2	1.18463	0.3059	upregulated	19	4.34073	0.013	upregulated	9	2.2347	0.107
caspase binding	GO	2 out of 6	5.2607					downregulated	1	2.43037	0.088									upregulated	2	2.83033	0.059
energy reserve metabolic process	GO	2 out of 6	5.25698	upregulated	2	2.76	0.0633	downregulated	1	0.404286	0.6675	upregulated	2	1.60326	0.2012	downregulated	4	1.97295	0.139	upregulated	5	2.31698	0.0986	upregulated	4	2.94	0.0529
ligand-gated calcium channel activity	GO	3 out of 6	5.24892					downregulated	1	4.04242	0.0176	upregulated	1	2.40072	0.0907	downregulated	2	2.02493	0.132	upregulated	3	4.64474	0.0096	downregulated	2	3.06245	0.0468
regulation of animal organ morphogenesis	GO	4 out of 6	5.22292	upregulated	13	2.89404	0.0554	downregulated	7	2.91999	0.0539	downregulated	19	3.77391	0.023	upregulated	1	1.64136	0.1937	upregulated	12	0.459513	0.6316	upregulated	10	2.60491	0.0739
establishment or maintenance of apical/basal cell polarity	GO	4 out of 6	5.2159	upregulated	2	0.840449	0.4315	downregulated	2	3.79299	0.0225	downregulated	2	0.799609	0.4495	upregulated	1	2.96545	0.0515	upregulated	6	2.69266	0.0677	upregulated	3	1.73654	0.1761
oocyte development	GO	5 out of 6	5.19002	downregulated	1	0.640648	0.527	downregulated	1	0.884866	0.4128	downregulated	3	1.65798	0.1905	downregulated	2	1.28974	0.2753	upregulated	2	0.716784	0.4883
protein phosphatase activator activity	GO	2 out of 6	5.16221	downregulated	1	1.92416	0.146	upregulated	1	1.09917	0.3331	downregulated	1	1.57215	0.2076	downregulated	1	5.18504	0.0056	downregulated	1	0.847824	0.4283
inner ear morphogenesis	GO	3 out of 6	5.16004	downregulated	3	1.79968	0.1654	downregulated	2	1.56803	0.2085	upregulated	6	2.91668	0.0541					upregulated	7	2.15652	0.1157	upregulated	6	4.35215	0.0129
vesicle coat	GO	5 out of 6	5.14371	downregulated	3	3.00988	0.0493	downregulated	2	1.68126	0.1861	downregulated	5	2.87942	0.0562	downregulated	4	1.58584	0.2048	downregulated	6	5.45189	0.0043	upregulated	2	1.4392	0.2371
muscle cell development	GO	4 out of 6	5.14332	upregulated	6	4.23257	0.0145	upregulated	5	1.53749	0.2149	downregulated	11	3.61303	0.027	downregulated	3	2.71703	0.0661	upregulated	8	3.01487	0.0491	upregulated	4	1.56844	0.2084
epiboly	GO	3 out of 6	5.11229	upregulated	1	2.44657	0.0866	upregulated	2	1.307	0.2706	upregulated	1	1.81131	0.1634	downregulated	1	3.30451	0.0367	upregulated	3	4.28935	0.0137	upregulated	2	3.0833	0.0458
positive regulation of interleukin-6 secretion	GO	4 out of 6	5.10446	downregulated	2	2.93813	0.053					downregulated	3	1.93692	0.1441	downregulated	1	1.74579	0.1745	upregulated	1	0.370809	0.6902	downregulated	1	1.88719	0.1515
carbon-sulfur lyase activity	GO	2 out of 6	5.10392	upregulated	1	1.4611	0.232	upregulated	1	1.286	0.2764	downregulated	1	4.33488	0.0131	downregulated	1	5.24738	0.0053	downregulated	1	1.73123	0.1771
response to osmotic stress	GO	2 out of 6	5.10011	upregulated	3	1.29216	0.2747	upregulated	1	2.24803	0.1056	downregulated	7	6.57263	0.0014	downregulated	10	8.819	0.0001	downregulated	4	3.27523	0.0378	downregulated	2	3.47611	0.0309
negative regulation of cyclin-dependent protein kinase activity	GO	4 out of 6	5.09157	upregulated	2	1.46793	0.2304	downregulated	1	2.03281	0.131	downregulated	2	1.97797	0.1383	upregulated	1	2.72501	0.0655	upregulated	2	1.61675	0.1985	upregulated	1	0.931962	0.3938
organic acid transmembrane transporter activity	GO	2 out of 6	5.07923	upregulated	8	3.15689	0.0426	upregulated	2	2.18192	0.1128	upregulated	4	5.3086	0.0049	downregulated	6	4.14693	0.0158	upregulated	9	2.12025	0.12	upregulated	6	2.95899	0.0519
kinase regulator activity	GO	3 out of 6	5.07463	upregulated	10	0.955035	0.3848	upregulated	7	2.38253	0.0923	downregulated	14	4.93743	0.0072	downregulated	8	4.8296	0.008	upregulated	16	1.84815	0.1575	upregulated	8	1.73445	0.1765
phosphatase activator activity	GO	2 out of 6	5.06669	downregulated	1	1.76773	0.1707	upregulated	1	0.963407	0.3816	downregulated	1	1.39016	0.249	downregulated	1	4.978	0.0069	downregulated	1	0.715632	0.4889
positive regulation of actin cytoskeleton reorganization	GO	2 out of 6	5.06066	downregulated	1	2.52353	0.0802	downregulated	1	4.75278	0.0086	upregulated	1	1.39351	0.2482					downregulated	1	0.822136	0.4395
IkappaB kinase complex	GO	3 out of 6	5.06007					upregulated	1	1.1751	0.3088	downregulated	2	2.89908	0.0551	downregulated	2	2.58897	0.0751	upregulated	1	0.747121	0.4737
telomere maintenance via telomere trimming	GO	3 out of 6	5.03448									downregulated	1	2.33505	0.0968					upregulated	1	1.39934	0.2468	upregulated	1	1.30009	0.2725
t-circle formation	GO	3 out of 6	5.03448									downregulated	1	2.33505	0.0968					upregulated	1	1.39934	0.2468	upregulated	1	1.30009	0.2725
positive regulation of endothelial cell chemotaxis	GO	3 out of 6	4.98309	downregulated	1	4.07441	0.017	downregulated	1	2.0926	0.1234									downregulated	3	5.27994	0.0051	upregulated	2	4.09602	0.0166
GTPase activator activity	GO	2 out of 6	4.9731	upregulated	16	3.65333	0.0259	downregulated	5	0.567428	0.567	downregulated	30	6.18376	0.0021	downregulated	20	8.98732	0.0001	upregulated	21	2.84575	0.0581	upregulated	6	2.12735	0.1192
antibiotic metabolic process	GO	3 out of 6	4.94994	downregulated	4	4.56499	0.0104	upregulated	3	0.996949	0.369	downregulated	9	3.35071	0.0351	downregulated	10	7.21905	0.0007	downregulated	10	7.10826	0.0008	downregulated	4	3.07655	0.0461
retinoid binding	GO	2 out of 6	4.9406	upregulated	1	1.5507	0.2121					upregulated	2	2.44954	0.0863	upregulated	1	1.53689	0.215	upregulated	3	2.03599	0.1306	upregulated	3	2.90461	0.0548
cardiocyte differentiation	GO	4 out of 6	4.9345	upregulated	8	5.86288	0.0028	upregulated	3	0.472611	0.6234	downregulated	6	4.8809	0.0076	downregulated	3	2.79866	0.0609	upregulated	11	2.51836	0.0806	upregulated	5	1.07207	0.3423
endolysosome membrane	GO	2 out of 6	4.91586					upregulated	1	3.6731	0.0254	downregulated	1	1.1291	0.3233	downregulated	4	9.39934	8.3e-05	downregulated	1	1.93948	0.1438
extrinsic component of membrane	GO	4 out of 6	4.87642	upregulated	12	4.39457	0.0123	upregulated	5	4.30172	0.0135	downregulated	16	3.54892	0.0288	downregulated	20	6.05089	0.0024	upregulated	13	3.21495	0.0402	upregulated	6	0.757959	0.4686
cellular response to epinephrine stimulus	GO	2 out of 6	4.8573	upregulated	1	1.25093	0.2862	downregulated	1	4.91757	0.0073	downregulated	1	1.19067	0.304
regulation of epithelial cell proliferation	GO	4 out of 6	4.8542	downregulated	11	2.91546	0.0542	upregulated	17	4.59905	0.0101	upregulated	15	4.35773	0.0128	downregulated	15	3.50266	0.0301	upregulated	31	2.9847	0.0506	upregulated	17	4.40815	0.0122
microtubule organizing center organization	GO	4 out of 6	4.82511	upregulated	3	0.99367	0.3702	upregulated	8	5.93368	0.0026	downregulated	12	5.36459	0.0047	downregulated	7	4.55626	0.0105	upregulated	7	1.47963	0.2277	upregulated	3	0.351984	0.7033
blood coagulation	GO	5 out of 6	4.77872	downregulated	6	0.8	0.4493	upregulated	13	5.57395	0.0038	downregulated	24	4.40117	0.0123	downregulated	14	3.87733	0.0207	upregulated	13	1.12812	0.3236	upregulated	5	0.146054	0.8641
coagulation	GO	5 out of 6	4.75939	downregulated	6	0.797957	0.4502	upregulated	13	5.56025	0.0038	downregulated	24	4.39588	0.0123	downregulated	14	3.86162	0.021	upregulated	13	1.1199	0.3263	upregulated	5	0.144285	0.8656
positive regulation of autophagy of mitochondrion	GO	3 out of 6	4.72587	downregulated	1	1.42045	0.2416					downregulated	3	3.30806	0.0366	downregulated	1	0.91968	0.3986	downregulated	1	0.922324	0.3976
transcriptional activator activity, RNA polymerase II transcription regulatory region sequence-specific DNA binding	GO	4 out of 6	4.70642	upregulated	14	2.38823	0.0918	downregulated	4	0.588054	0.5554	upregulated	8	3.20145	0.0407	downregulated	20	1.8459	0.1579	upregulated	37	2.54587	0.0784	upregulated	19	2.92804	0.0535
chylomicron	GO	2 out of 6	4.70544					upregulated	1	1.30968	0.2699	downregulated	1	0.639388	0.5276					upregulated	3	5.37573	0.0046
cerebellar cortex formation	GO	2 out of 6	4.69453									downregulated	3	3.17317	0.0419					upregulated	2	1.52137	0.2184
protein localization to postsynaptic membrane	GO	3 out of 6	4.6915	upregulated	3	3.44928	0.0318	downregulated	2	3.61946	0.0268	upregulated	1	3.08419	0.0458					upregulated	2	3.56897	0.0282	upregulated	2	4.03654	0.0177
learning	GO	4 out of 6	4.6812	upregulated	5	2.58694	0.0752	downregulated	2	0.834409	0.4341	upregulated	7	3.00304	0.0496	downregulated	6	2.68379	0.0683	upregulated	8	2.97499	0.051	upregulated	6	3.77798	0.0229
lipid digestion	GO	3 out of 6	4.6752									upregulated	1	2.80159	0.0607	downregulated	2	4.00095	0.0183	upregulated	1	1.95284	0.1419	upregulated	1	1.523	0.2181
transcriptional repressor activity, RNA polymerase II distal enhancer sequence-specific binding	GO	3 out of 6	4.66375					downregulated	1	4.71801	0.0089	upregulated	2	3.82248	0.0219	downregulated	1	1.62263	0.1974	upregulated	1	2.14559	0.117
negative regulation of vasculature development	GO	4 out of 6	4.66322	downregulated	6	2.48814	0.0831	upregulated	4	3.03624	0.048	downregulated	6	2.59836	0.0744	downregulated	6	2.00466	0.1347	upregulated	9	2.24938	0.1055	upregulated	4	0.608305	0.5443
regulation of lysosomal lumen pH	GO	1 out of 6	4.6607									downregulated	2	4.6607	0.0095
ceramide binding	GO	2 out of 6	4.65266	upregulated	1	0.843731	0.4301					downregulated	2	3.77473	0.0229	downregulated	1	1.72166	0.1788
response to epinephrine	GO	2 out of 6	4.65216	upregulated	1	1.13216	0.3223	downregulated	1	4.71073	0.009	downregulated	1	1.07359	0.3418
post-anal tail morphogenesis	GO	3 out of 6	4.62722	upregulated	3	4.88414	0.0076					downregulated	1	0.396243	0.6728					upregulated	3	3.46997	0.0311	upregulated	3	5.64515	0.0035
protein kinase regulator activity	GO	3 out of 6	4.61817	upregulated	9	0.976568	0.3766	upregulated	6	2.23845	0.1066	upregulated	9	4.33181	0.0131	downregulated	7	3.81868	0.022	upregulated	12	1.98101	0.1379	upregulated	6	2.0335	0.1309
hemostasis	GO	5 out of 6	4.61392	downregulated	6	0.78585	0.4557	upregulated	13	5.53988	0.0039	downregulated	24	4.36445	0.0127	downregulated	14	3.76878	0.0231	upregulated	13	1.09561	0.3343	upregulated	5	0.139104	0.8701
nuclear pore central transport channel	GO	2 out of 6	4.59393					upregulated	1	2.17145	0.114									upregulated	3	3.70322	0.0246	upregulated	2	3.06216	0.0468
positive regulation of autophagy of mitochondrion in response to mitochondrial depolarization	GO	3 out of 6	4.58549	downregulated	1	1.75978	0.1721					downregulated	2	1.59946	0.202	downregulated	1	1.22625	0.2934
positive regulation of mitotic cell cycle phase transition	GO	4 out of 6	4.54799	upregulated	2	0.273227	0.7609	downregulated	1	1.19315	0.3033	downregulated	5	1.29448	0.274	downregulated	2	0.783109	0.457	downregulated	2	0.524505	0.5918	upregulated	4	2.07498	0.1256
negative regulation of angiogenesis	GO	4 out of 6	4.54151	downregulated	5	2.11086	0.1211	upregulated	4	3.2977	0.037	downregulated	5	3.16102	0.0424	downregulated	5	2.14083	0.1176	downregulated	3	2.29497	0.1008	upregulated	3	0.426497	0.6528
positive regulation of autophagosome assembly	GO	3 out of 6	4.54026	upregulated	1	0.769049	0.4635	upregulated	1	1.62709	0.1965	downregulated	1	3.55814	0.0285	downregulated	3	6.30589	0.0018	downregulated	2	4.89906	0.0075	upregulated	1	1.97143	0.1393
response to antineoplastic agent	GO	4 out of 6	4.53626	downregulated	2	4.69172	0.0092	upregulated	6	4.87229	0.0077	downregulated	8	2.70763	0.0667	downregulated	5	2.66368	0.0697	downregulated	3	0.943285	0.3893	upregulated	2	0.288802	0.7492
protein localization to membrane	GO	4 out of 6	4.50438	upregulated	28	5.12112	0.006	upregulated	14	2.22671	0.1079	downregulated	29	2.74162	0.0645	downregulated	18	3.91747	0.0199	upregulated	23	2.4329	0.0878	upregulated	13	2.76022	0.0633
kinase inhibitor activity	GO	4 out of 6	4.50344	upregulated	5	2.31779	0.0985	downregulated	1	1.33482	0.2632	downregulated	2	1.28774	0.2759	downregulated	1	1.28774	0.2759	upregulated	6	1.65647	0.1908	upregulated	3	2.5422	0.0787
phosphatidylinositol 3-kinase regulatory subunit binding	GO	2 out of 6	4.49682									downregulated	1	0.879127	0.4151	downregulated	2	3.61769	0.0268
phospholipid binding	GO	2 out of 6	4.48198	downregulated	11	2.53751	0.0791	upregulated	7	0.944358	0.3889	downregulated	41	15.4656	1.9e-07	downregulated	25	8.02771	0.0003	upregulated	25	3.16613	0.0422	upregulated	13	1.31584	0.2682
DNA repair	GO	2 out of 6	4.4774	upregulated	30	2.97728	0.0509	upregulated	30	10.8195	2e-05	downregulated	32	2.09329	0.1233	downregulated	25	4.833	0.008	upregulated	31	2.06798	0.1264	upregulated	18	2.40942	0.0899
lymph vessel morphogenesis	GO	3 out of 6	4.45619	downregulated	2	5.19265	0.0056	downregulated	2	2.75498	0.0636	upregulated	2	4.84304	0.0079					upregulated	2	1.35162	0.2588
protein secretion	GO	3 out of 6	4.44956	upregulated	5	2.26242	0.1041	upregulated	2	1.76152	0.1718	upregulated	5	1.84971	0.1573	downregulated	7	3.53052	0.0293	upregulated	6	3.75106	0.0235	upregulated	4	1.19192	0.3036
protein kinase inhibitor activity	GO	2 out of 6	4.43277	upregulated	5	2.54669	0.0783	downregulated	1	1.38946	0.2492	downregulated	2	1.34189	0.2614	downregulated	1	1.34189	0.2614	upregulated	6	1.76651	0.1709	upregulated	3	2.66627	0.0695
guanyl-nucleotide exchange factor activity	GO	2 out of 6	4.39763	downregulated	11	5.93737	0.0026	upregulated	11	3.84403	0.0214	downregulated	35	14.2692	6.4e-07	downregulated	23	6.60396	0.0014	upregulated	16	1.60424	0.201	upregulated	15	2.79339	0.0612
positive regulation of lymphocyte migration	GO	2 out of 6	4.38692									upregulated	1	1.92715	0.1456	downregulated	3	3.77409	0.023	downregulated	1	0.793347	0.4523	upregulated	3	3.33333	0.0357
cell surface receptor signaling pathway involved in cell-cell signaling	GO	3 out of 6	4.37331	upregulated	22	4.03407	0.0177	downregulated	6	2.98656	0.0505	upregulated	12	2.85662	0.0575	upregulated	4	1.69473	0.1836	upregulated	32	4.6481	0.0096	upregulated	20	5.32407	0.0049
G-protein coupled purinergic nucleotide receptor signaling pathway	GO	4 out of 6	4.34928	downregulated	1	5.37285	0.0046	upregulated	2	10.5124	2.7e-05	upregulated	1	3.37195	0.0343	downregulated	2	5.59477	0.0037	upregulated	1	3.76258	0.0232	upregulated	1	3.50341	0.0301
phosphatase binding	GO	3 out of 6	4.3479	downregulated	8	2.36931	0.0935	upregulated	3	1.58081	0.2058	downregulated	16	4.05684	0.0173	downregulated	7	2.30761	0.0995	downregulated	6	1.38657	0.2499	downregulated	3	1.41848	0.2421
regulation of PERK-mediated unfolded protein response	GO	3 out of 6	4.34004					upregulated	1	0.992992	0.3705	downregulated	2	3.53678	0.0291	downregulated	1	1.05353	0.3487	upregulated	1	0.742723	0.4758
positive regulation of transcription of nucleolar large rRNA by RNA polymerase I	GO	3 out of 6	4.33815					upregulated	1	1.1008	0.3326	downregulated	1	0.612888	0.5418	downregulated	1	1.11093	0.3293	downregulated	1	2.45236	0.0861	upregulated	2	3.71513	0.0244
macroautophagy	GO	3 out of 6	4.33617	upregulated	4	0.372246	0.6892	upregulated	8	1.51717	0.2193	downregulated	12	3.34046	0.0354	downregulated	6	1.53252	0.216	downregulated	6	1.39286	0.2484	upregulated	7	2.74546	0.0642
negative regulation of ATP metabolic process	GO	2 out of 6	4.3351	upregulated	2	1.43589	0.2379	downregulated	1	5.27525	0.0051	downregulated	1	0.495734	0.6091
transcriptional repressor complex	GO	3 out of 6	4.31827	upregulated	6	1.90005	0.1496	downregulated	2	2.61015	0.0735	upregulated	3	0.979915	0.3753	downregulated	2	0.516411	0.5967	upregulated	10	4.3496	0.0129	upregulated	5	2.33222	0.0971
mitotic spindle midzone	GO	3 out of 6	4.31637	upregulated	1	1.18687	0.3052					downregulated	4	4.66393	0.0094	downregulated	2	2.28216	0.1021	upregulated	1	0.510521	0.6002	downregulated	1	1.95336	0.1418
atrial cardiac muscle cell to AV node cell communication	GO	3 out of 6	4.31585	upregulated	1	2.66864	0.0693					upregulated	1	1.08774	0.337	downregulated	1	2.46594	0.0849	upregulated	1	2.95358	0.0522	upregulated	1	2.65271	0.0705
mitochondrion localization	GO	4 out of 6	4.31462	downregulated	3	4.46033	0.0116	downregulated	1	0.518979	0.5951	downregulated	3	0.411489	0.6627					downregulated	1	1.79783	0.1657	upregulated	2	0.721649	0.486
SH3/SH2 adaptor activity	GO	2 out of 6	4.31453	upregulated	2	1.65175	0.1917	upregulated	2	0.61461	0.5409	downregulated	5	2.43872	0.0873	downregulated	2	0.72655	0.4836	upregulated	8	3.05545	0.0471	upregulated	3	1.25908	0.2839
regulation of carbohydrate metabolic process by regulation of transcription from RNA polymerase II promoter	GO	2 out of 6	4.28998									downregulated	1	1.48886	0.2256					upregulated	3	2.80112	0.0607
positive regulation of organelle assembly	GO	3 out of 6	4.25696	upregulated	3	2.39988	0.0907	upregulated	5	1.78004	0.1686	downregulated	6	1.81416	0.163	downregulated	6	3.47972	0.0308	upregulated	8	4.81488	0.0081	downregulated	2	1.67188	0.1879
cerebellar Purkinje cell layer morphogenesis	GO	1 out of 6	4.23495									downregulated	3	4.23495	0.0145
muscle fiber development	GO	2 out of 6	4.21104	upregulated	1	3.47432	0.031	upregulated	2	2.12043	0.12	downregulated	3	4.90936	0.0074	downregulated	1	3.99856	0.0183	downregulated	2	1.22255	0.2945
positive regulation of cell cycle phase transition	GO	4 out of 6	4.1705	upregulated	2	0.211873	0.8091	upregulated	3	1.1051	0.3312	downregulated	5	1.02865	0.3575	downregulated	3	1.22445	0.2939	upregulated	6	0.951987	0.386	upregulated	5	2.28239	0.102
mitotic spindle pole	GO	4 out of 6	4.16316	downregulated	2	3.75641	0.0234	upregulated	2	1.49323	0.2246	downregulated	4	1.75824	0.1723	downregulated	4	3.61743	0.0269	upregulated	2	1.33253	0.2638	downregulated	3	4.80822	0.0082
detection of biotic stimulus	GO	3 out of 6	4.15026					upregulated	1	3.61585	0.0269	downregulated	1	0.622947	0.5364	downregulated	3	6.13048	0.0022	upregulated	1	1.01268	0.3632
signal transduction involved in mitotic G1 DNA damage checkpoint	GO	3 out of 6	4.14565	upregulated	1	0.0242328	0.9761	upregulated	4	3.79104	0.0226	downregulated	9	6.86057	0.001	downregulated	4	2.69796	0.0673	upregulated	5	0.509845	0.6006	downregulated	3	2.10745	0.1215
signal transduction involved in mitotic cell cycle checkpoint	GO	3 out of 6	4.14565	upregulated	1	0.0242328	0.9761	upregulated	4	3.79104	0.0226	downregulated	9	6.86057	0.001	downregulated	4	2.69796	0.0673	upregulated	5	0.509845	0.6006	downregulated	3	2.10745	0.1215
signal transduction involved in mitotic DNA damage checkpoint	GO	3 out of 6	4.14565	upregulated	1	0.0242328	0.9761	upregulated	4	3.79104	0.0226	downregulated	9	6.86057	0.001	downregulated	4	2.69796	0.0673	upregulated	5	0.509845	0.6006	downregulated	3	2.10745	0.1215
cytoplasm organization	GO	3 out of 6	4.14401	upregulated	1	1.06693	0.3441					downregulated	1	0.746164	0.4742					upregulated	1	1.45311	0.2338	upregulated	1	3.01165	0.0492
regulation of microtubule motor activity	GO	2 out of 6	4.14337	upregulated	1	2.04237	0.1297					downregulated	1	3.11745	0.0443	downregulated	1	3.0683	0.0465
regulation of amyloid precursor protein catabolic process	GO	2 out of 6	4.1412	upregulated	1	0.386221	0.6796	upregulated	1	0.626748	0.5343	downregulated	3	3.24205	0.0391	downregulated	2	1.91212	0.1478	downregulated	5	5.52088	0.004	upregulated	2	2.76512	0.063
eye morphogenesis	GO	3 out of 6	4.13842	upregulated	9	7.2154	0.0007	upregulated	3	1.49502	0.2242	downregulated	13	5.22145	0.0054	upregulated	1	1.07474	0.3414	upregulated	14	3.76072	0.0233	upregulated	11	4.94139	0.0071
cellular response to interleukin-7	GO	2 out of 6	4.12155	upregulated	2	2.81426	0.0599					downregulated	3	2.16864	0.1143	downregulated	1	1.95291	0.1419
regulation of odontogenesis of dentin-containing tooth	GO	2 out of 6	4.10988									downregulated	1	3.52945	0.0293					upregulated	1	0.580424	0.5597
positive regulation of exosomal secretion	GO	3 out of 6	4.1006					upregulated	1	1.09176	0.3356					downregulated	1	1.59724	0.2025	upregulated	1	2.26834	0.1035	upregulated	1	1.32678	0.2653
organelle outer membrane	GO	3 out of 6	4.09932	downregulated	4	0.886853	0.4119	upregulated	8	2.93377	0.0532	downregulated	16	8.0619	0.0003	downregulated	10	4.41283	0.0121	downregulated	7	4.52086	0.0109	downregulated	2	1.80764	0.164
cytoplasmic ribonucleoprotein granule	GO	3 out of 6	4.08453	upregulated	8	1.15344	0.3155	downregulated	3	2.26415	0.1039	downregulated	18	2.29973	0.1003	downregulated	12	3.09588	0.0452	downregulated	5	0.663512	0.515	downregulated	6	2.42179	0.0888
organelle transport along microtubule	GO	4 out of 6	4.07399	downregulated	2	2.68223	0.0684	downregulated	2	3.27522	0.0378	downregulated	5	1.93702	0.1441	downregulated	1	1.24792	0.2871	downregulated	3	2.47203	0.0844	upregulated	1	0.0858568	0.9177
reactive oxygen species biosynthetic process	GO	3 out of 6	4.03118									downregulated	2	1.59674	0.2026	downregulated	2	3.35094	0.0351	upregulated	3	1.97342	0.139	downregulated	2	2.88992	0.0556
pyrimidine nucleotide-sugar transmembrane transport	GO	3 out of 6	4.02843	downregulated	1	1.94015	0.1437	upregulated	1	1.9674	0.1398	downregulated	1	2.08726	0.124	downregulated	1	1.96841	0.1397
outer membrane	GO	3 out of 6	4.02834	downregulated	4	0.869971	0.419	upregulated	9	2.92429	0.0537	downregulated	16	7.99076	0.0003	downregulated	10	4.35028	0.0129	downregulated	7	4.46573	0.0115	downregulated	2	1.79265	0.1665
voltage-gated potassium channel activity involved in cardiac muscle cell action potential repolarization	GO	2 out of 6	3.9995									downregulated	1	2.30464	0.0998					upregulated	2	1.69485	0.1836
aminoacyl-tRNA metabolism involved in translational fidelity	GO	2 out of 6	3.99368					downregulated	1	2.28286	0.102									upregulated	1	1.71082	0.1807
peptidoglycan binding	GO	1 out of 6	3.99132													downregulated	1	3.99132	0.0185
collagen binding	GO	2 out of 6	3.98673	upregulated	2	0.657321	0.5182	upregulated	1	2.91342	0.0543	downregulated	6	3.85737	0.0211	downregulated	8	8.70292	0.0002	upregulated	5	2.68856	0.068	upregulated	3	1.29817	0.273
cardiac muscle cell contraction	GO	4 out of 6	3.97339	upregulated	4	8.20101	0.0003	downregulated	3	6.08	0.0023	upregulated	2	1.30093	0.2723	downregulated	1	1.614	0.1991	upregulated	4	2.21959	0.1087	upregulated	2	3.56174	0.0284
modification-dependent protein binding	GO	3 out of 6	3.93953	upregulated	9	0.956239	0.3843	upregulated	12	4.00592	0.0182	upregulated	7	3.09726	0.0452	downregulated	14	6.33223	0.0018	upregulated	14	2.15393	0.116	upregulated	7	3.51279	0.0298
endocrine system development	GO	3 out of 6	3.93917	upregulated	4	1.23291	0.2914	downregulated	1	1.6224	0.1974	upregulated	3	1.77316	0.1698	upregulated	2	1.28402	0.2769	upregulated	7	2.81511	0.0599	upregulated	6	3.79175	0.0226
regulation of autophagy of mitochondrion	GO	4 out of 6	3.93714	downregulated	1	0.748042	0.4733	upregulated	1	0.25391	0.7758	downregulated	4	2.46626	0.0849	downregulated	4	3.37665	0.0342	downregulated	4	3.15933	0.0425	upregulated	2	0.759432	0.4679
cardiac muscle cell action potential involved in contraction	GO	4 out of 6	3.92504	upregulated	4	8.41364	0.0002	downregulated	3	6.18725	0.0021	upregulated	2	1.4503	0.2345	downregulated	1	1.70873	0.1811	upregulated	4	2.27249	0.1031	upregulated	2	3.6205	0.0268
positive regulation of endoplasmic reticulum unfolded protein response	GO	2 out of 6	3.91701									downregulated	2	3.17061	0.042	downregulated	1	0.746405	0.4741
mitotic G1/S transition checkpoint	GO	3 out of 6	3.89618	upregulated	3	0.273072	0.761	upregulated	4	3.55457	0.0286	downregulated	9	6.2306	0.002	downregulated	5	2.73367	0.065	upregulated	6	0.720965	0.4863	downregulated	3	1.96142	0.1407
autophagy	GO	2 out of 6	3.89159	upregulated	9	1.0757	0.3411	upregulated	13	1.93737	0.1441	downregulated	22	6.56776	0.0014	downregulated	10	2.49392	0.0826	downregulated	9	2.15702	0.1157	upregulated	10	2.22217	0.1084
response to ischemia	GO	5 out of 6	3.87282	downregulated	1	0.471512	0.6241	upregulated	2	5.60177	0.0037	downregulated	1	2.04606	0.1292	downregulated	1	1.4191	0.2419	upregulated	2	3.54305	0.0289	upregulated	1	1.99487	0.136
establishment of endothelial intestinal barrier	GO	3 out of 6	3.84683					upregulated	2	1.68611	0.1852					downregulated	1	2.16044	0.1153	upregulated	1	1.51132	0.2206	upregulated	1	1.86118	0.1555
integrator complex	GO	3 out of 6	3.84613									downregulated	2	0.918781	0.399	downregulated	2	2.09025	0.1237					upregulated	1	0.837098	0.433
tubulin binding	GO	2 out of 6	3.83986	upregulated	21	4.42685	0.012	upregulated	13	1.7345	0.1765	downregulated	35	9.83566	5.4e-05	downregulated	21	6.52196	0.0015	downregulated	9	2.65477	0.0703	downregulated	7	3.70164	0.0247
ceramide transporter activity	GO	2 out of 6	3.82432	upregulated	1	1.03425	0.3555					downregulated	1	2.9109	0.0544	downregulated	1	1.94767	0.1426
keratinization	GO	4 out of 6	3.82212	downregulated	3	1.93196	0.1449	downregulated	2	2.94841	0.0524	upregulated	2	1.64584	0.1929	upregulated	2	1.45288	0.2339	upregulated	2	0.335319	0.7151	upregulated	3	1.70515	0.1817
arrestin family protein binding	GO	3 out of 6	3.8055					upregulated	1	1.19732	0.302	downregulated	1	1.42196	0.2412	downregulated	1	1.62951	0.196	upregulated	2	1.95136	0.1421
proximal/distal pattern formation	GO	3 out of 6	3.76318	upregulated	1	0.494422	0.6099					downregulated	3	3.68573	0.0251	downregulated	2	2.77641	0.0623	upregulated	1	0.413251	0.6615	downregulated	1	2.61779	0.073
protein localization to cell junction	GO	3 out of 6	3.76004	upregulated	1	2.18494	0.1125					downregulated	1	0.662583	0.5155					upregulated	2	3.18454	0.0414	upregulated	1	2.09786	0.1227
lymphocyte proliferation	GO	2 out of 6	3.75779	upregulated	2	2.61449	0.0732	upregulated	2	0.309906	0.7335	downregulated	4	3.94184	0.0194	downregulated	4	4.44159	0.0118	downregulated	2	1.0033	0.3667	downregulated	1	0.697949	0.4976
regulation of JAK-STAT cascade	GO	3 out of 6	3.72881	downregulated	4	2.17045	0.1141	downregulated	1	2.25252	0.1051	upregulated	3	0.527803	0.5899	downregulated	4	1.22322	0.2943	downregulated	3	0.436221	0.6465	downregulated	3	0.953348	0.3854
mononuclear cell proliferation	GO	2 out of 6	3.72857	upregulated	2	2.57351	0.0763	upregulated	2	0.293804	0.7454	downregulated	4	3.87977	0.0207	downregulated	4	4.37785	0.0126	downregulated	2	0.982275	0.3745	downregulated	1	0.679464	0.5069
regulation of defense response to bacterium	GO	1 out of 6	3.6731									upregulated	1	4.7634	0.0085	downregulated	1	3.6731	0.0254
negative regulation of synapse organization	GO	4 out of 6	3.66744	upregulated	3	2.45923	0.0855	upregulated	3	4.9929	0.0068	downregulated	2	1.89751	0.1499	downregulated	5	5.79561	0.003	upregulated	4	2.32225	0.0981	upregulated	1	1.1042	0.3315
ribonucleoprotein granule	GO	3 out of 6	3.66091	upregulated	9	1.10205	0.3322	downregulated	3	2.20475	0.1103	downregulated	19	2.21589	0.1091	downregulated	12	2.68559	0.0682	downregulated	5	0.601263	0.5481	downregulated	6	2.34327	0.096
embryonic brain development	GO	3 out of 6	3.64754									downregulated	1	0.635024	0.5299					upregulated	1	1.32267	0.2664	upregulated	1	1.68985	0.1845
male sex determination	GO	2 out of 6	3.646									downregulated	1	1.89556	0.1502	downregulated	1	1.75044	0.1737
mRNA splice site selection	GO	2 out of 6	3.64421	downregulated	2	1.79124	0.1668	downregulated	1	3.66358	0.0256	downregulated	6	2.23636	0.1068					upregulated	3	1.59266	0.2034	upregulated	2	2.05155	0.1285
CoA-ligase activity	GO	4 out of 6	3.64028	downregulated	3	4.92449	0.0073	upregulated	1	0.698759	0.4972	upregulated	4	6.49082	0.0015	downregulated	1	1.14797	0.3173	upregulated	3	3.56098	0.0284	upregulated	1	1.19643	0.3023
ceramide transport	GO	2 out of 6	3.63216	upregulated	1	0.94522	0.3886					downregulated	1	2.73409	0.065	downregulated	1	1.8433	0.1583
anatomical structure regression	GO	2 out of 6	3.62921					upregulated	1	1.56136	0.2099									upregulated	2	2.70765	0.0667	upregulated	1	2.48291	0.0835
transaminase activity	GO	2 out of 6	3.61972									upregulated	1	2.92732	0.0535					upregulated	3	2.77599	0.0623	upregulated	2	3.77105	0.023
negative regulation of secretion	GO	4 out of 6	3.59781	upregulated	7	0.732296	0.4808	upregulated	6	9.12706	0.0001	downregulated	14	4.1665	0.0155	downregulated	11	4.39237	0.0124	upregulated	11	3.25379	0.0386	upregulated	8	1.6445	0.1931
lipoprotein biosynthetic process	GO	4 out of 6	3.59763	upregulated	8	6.35099	0.0017	upregulated	4	1.84038	0.1588	downregulated	4	2.10605	0.1217	downregulated	5	1.87599	0.1532	upregulated	7	4.31404	0.0134	upregulated	6	3.49293	0.0304
replication fork	GO	1 out of 6	3.59691	upregulated	4	2.38265	0.0923	upregulated	4	2.06507	0.1268	downregulated	4	0.745568	0.4745	downregulated	4	1.67351	0.1876	upregulated	6	3.59691	0.0274	downregulated	1	3.5639	0.0283
striated muscle cell development	GO	4 out of 6	3.55932	upregulated	5	4.40304	0.0122	upregulated	5	1.78397	0.168	downregulated	9	3.7021	0.0247	downregulated	2	2.80436	0.0605	upregulated	8	2.22115	0.1085	upregulated	3	1.01872	0.3611
calcium import into the mitochondrion	GO	1 out of 6	3.55733	upregulated	1	1.48845	0.2257	downregulated	2	5.04578	0.0064
positive regulation of extracellular matrix organization	GO	3 out of 6	3.54717					upregulated	1	0.636653	0.5291	downregulated	4	5.41614	0.0044	downregulated	1	0.837446	0.4328	upregulated	3	1.51737	0.2193	downregulated	2	3.58714	0.0277
protein acetyltransferase complex	GO	4 out of 6	3.52545	upregulated	7	2.25375	0.105	upregulated	5	2.23726	0.1068	downregulated	7	1.69277	0.184	downregulated	1	0.0215252	0.9787	upregulated	11	4.02802	0.0178	upregulated	5	2.27414	0.1029
regulation of non-motile cilium assembly	GO	4 out of 6	3.51755	upregulated	1	3.21338	0.0402	downregulated	1	1.30306	0.2717	downregulated	3	2.65854	0.0701	downregulated	2	2.10173	0.1222	upregulated	1	0.667595	0.5129
RNA polymerase complex	GO	4 out of 6	3.5008	downregulated	3	0.946758	0.388	upregulated	8	2.96162	0.0517	downregulated	9	1.13105	0.3227	downregulated	9	3.88636	0.0205	upregulated	9	1.78623	0.1676	downregulated	2	1.28796	0.2758
regulation of ruffle assembly	GO	5 out of 6	3.4951	downregulated	1	1.42172	0.2413	upregulated	2	7.05354	0.0009	downregulated	4	2.49868	0.0822	downregulated	3	3.8146	0.022	upregulated	1	0.879409	0.415	upregulated	2	1.93423	0.1445
steroid biosynthetic process	GO	2 out of 6	3.48045	upregulated	4	0.613946	0.5412	upregulated	6	2.57115	0.0764	downregulated	9	3.87099	0.0208	downregulated	11	8.18518	0.0003	downregulated	7	2.7279	0.0654	downregulated	4	2.66273	0.0698
transcription cofactor binding	GO	3 out of 6	3.47144	upregulated	2	0.352693	0.7028	upregulated	3	0.98494	0.3735	downregulated	3	3.27611	0.0378	downregulated	2	2.73997	0.0646	upregulated	2	0.586897	0.5561	downregulated	1	1.79391	0.1663
positive regulation of epithelial cell apoptotic process	GO	4 out of 6	3.42831	upregulated	1	2.75102	0.0639	downregulated	1	1.6154	0.1988	downregulated	4	3.04357	0.0477	downregulated	3	2.19389	0.1115	upregulated	3	1.27117	0.2805	downregulated	1	1.9447	0.143
phagosome maturation	GO	3 out of 6	3.4235	upregulated	1	1.37858	0.2519					upregulated	1	2.90874	0.0545	downregulated	3	3.91336	0.02	upregulated	2	2.27684	0.1026	upregulated	1	1.52061	0.2186
pseudopodium	GO	3 out of 6	3.41221	upregulated	1	1.58356	0.2052	upregulated	1	0.924089	0.3969	downregulated	4	4.55279	0.0105	downregulated	2	2.78087	0.062	downregulated	2	3.14583	0.043	upregulated	1	1.73202	0.1769
modulation by host of viral process	GO	2 out of 6	3.41151					upregulated	3	4.86632	0.0077									upregulated	4	5.0797	0.0062	upregulated	2	3.19813	0.0408
vitamin biosynthetic process	GO	2 out of 6	3.40454	upregulated	1	0.909965	0.4025	upregulated	1	0.984474	0.3736	upregulated	1	1.60011	0.2019					upregulated	2	2.96159	0.0517	upregulated	1	3.9375	0.0195
clathrin binding	GO	4 out of 6	3.38715	upregulated	3	2.46979	0.0846	downregulated	1	0.626826	0.5343	downregulated	5	2.7442	0.0643	downregulated	1	2.36766	0.0937	downregulated	3	2.95846	0.0519	upregulated	3	3.07671	0.0461
negative regulation of neuron death	GO	4 out of 6	3.37233	upregulated	13	5.47806	0.0042	upregulated	3	1.74655	0.1744	downregulated	12	4.25632	0.0142	downregulated	7	1.20454	0.2998	upregulated	12	2.88223	0.056	upregulated	5	2.25384	0.105
negative regulation of neural precursor cell proliferation	GO	3 out of 6	3.35965					upregulated	1	3.03253	0.0482	downregulated	2	2.58335	0.0755	downregulated	1	1.48926	0.2255	downregulated	1	4.20686	0.0149	upregulated	4	6.52642	0.0015
inclusion body	GO	5 out of 6	3.35853	downregulated	3	1.73334	0.1767	downregulated	2	0.679186	0.507	downregulated	6	1.87617	0.1532	downregulated	2	0.280273	0.7556	downregulated	3	2.43138	0.0879	upregulated	3	1.22094	0.295
spliceosomal complex	GO	1 out of 6	3.35209	upregulated	11	2.255	0.1049	upregulated	15	7.57245	0.0005	upregulated	5	2.24813	0.1056	downregulated	7	1.05876	0.3469	upregulated	15	4.71295	0.009	downregulated	3	1.36086	0.2564
phenol-containing compound metabolic process	GO	3 out of 6	3.34828	upregulated	5	1.7938	0.1663	upregulated	2	4.3338	0.0131	upregulated	4	2.76784	0.0628	downregulated	5	3.51999	0.0296	upregulated	4	2.57384	0.0762	upregulated	3	3.38205	0.034
regulation of reactive oxygen species metabolic process	GO	3 out of 6	3.33559	downregulated	6	1.51552	0.2197	upregulated	8	6.2814	0.0019	downregulated	15	6.12621	0.0022	downregulated	13	7.101	0.0008	downregulated	7	2.54636	0.0784	downregulated	4	2.57937	0.0758
interstrand cross-link repair	GO	4 out of 6	3.32971	upregulated	4	1.59797	0.2023	upregulated	4	2.81735	0.0598	downregulated	4	1.45838	0.2326	downregulated	3	1.44727	0.2352	upregulated	3	2.21236	0.1094	upregulated	3	2.62703	0.0723
G1 DNA damage checkpoint	GO	3 out of 6	3.30519	upregulated	4	0.577552	0.5613	upregulated	4	3.45255	0.0317	downregulated	9	5.96218	0.0026	downregulated	5	2.61123	0.0734	upregulated	6	0.68887	0.5021	downregulated	3	1.92698	0.1456
positive regulation of NIK/NF-kappaB signaling	GO	3 out of 6	3.30319	upregulated	4	2.14307	0.1173	upregulated	3	5.57742	0.0038	downregulated	8	4.25528	0.0142	downregulated	8	7.44915	0.0006	upregulated	5	1.27587	0.2792	downregulated	2	1.95663	0.1413
transcription factor activity, direct ligand regulated sequence-specific DNA binding	GO	5 out of 6	3.3007	downregulated	3	1.73583	0.1763	downregulated	2	2.14088	0.1176	downregulated	2	0.0724494	0.9301	upregulated	2	3.68353	0.0251	upregulated	6	1.32382	0.2661	upregulated	4	1.71126	0.1806
actin filament bundle organization	GO	3 out of 6	3.28802	downregulated	1	1.45111	0.2343	upregulated	5	4.44805	0.0117	upregulated	2	0.951353	0.3862	upregulated	3	2.95589	0.052	upregulated	7	5.24234	0.0053	upregulated	4	4.94986	0.0071
photoreceptor cell maintenance	GO	4 out of 6	3.27179	upregulated	1	1.17608	0.3085	upregulated	2	2.51812	0.0806	downregulated	1	0.801393	0.4487	downregulated	1	2.09303	0.1233	upregulated	1	1.95909	0.141	upregulated	1	2.11247	0.1209
ncRNA transcription	GO	4 out of 6	3.25013	upregulated	3	0.193203	0.8243	downregulated	1	0.307177	0.7355	downregulated	9	2.31137	0.0991	downregulated	4	1.03716	0.3545	upregulated	3	0.287679	0.75	downregulated	1	0.500063	0.6065
response to amino acid starvation	GO	3 out of 6	3.22834	upregulated	4	3.73865	0.0238	upregulated	3	4.38953	0.0124	upregulated	3	3.04125	0.0478	downregulated	3	2.38168	0.0924	upregulated	6	5.12125	0.006	upregulated	3	3.85359	0.0212
integrin binding	GO	2 out of 6	3.22421	downregulated	1	0.368309	0.6919	upregulated	2	1.36247	0.256	downregulated	14	7.08954	0.0008	downregulated	11	7.14474	0.0008	upregulated	5	1.63502	0.1949	upregulated	2	1.5892	0.2041
odontogenesis	GO	4 out of 6	3.19649	downregulated	4	1.73558	0.1763	upregulated	1	1.34714	0.26	downregulated	7	1.82988	0.1604	downregulated	3	0.83417	0.4342	downregulated	3	3.76158	0.0232	upregulated	3	3.90558	0.0201
negative regulation of anoikis	GO	4 out of 6	3.19569	downregulated	2	2.15066	0.1164	upregulated	2	3.5783	0.0279	upregulated	2	1.91299	0.1476	downregulated	1	0.522829	0.5928	upregulated	4	3.46265	0.0313	upregulated	2	2.55085	0.078
Wnt signaling pathway involved in midbrain dopaminergic neuron differentiation	GO	2 out of 6	3.18592																	upregulated	1	1.1108	0.3293	upregulated	1	2.07513	0.1255
regulation of myoblast fusion	GO	3 out of 6	3.16877					upregulated	2	1.49955	0.2232	downregulated	1	1.62755	0.1964	downregulated	1	2.69396	0.0676	downregulated	2	1.39994	0.2466	upregulated	1	1.74675	0.1743
regulation of apoptotic process involved in development	GO	2 out of 6	3.15677	downregulated	2	2.72952	0.0653													upregulated	1	0.427249	0.6523
regulation of mitochondrial outer membrane permeabilization involved in apoptotic signaling pathway	GO	4 out of 6	3.15101	downregulated	3	2.50738	0.0815	downregulated	1	1.01902	0.3609	downregulated	4	2.37864	0.0927	downregulated	1	0.41849	0.658	downregulated	3	3.17252	0.0419	downregulated	2	3.10003	0.045
positive regulation of T cell migration	GO	2 out of 6	3.13456									upregulated	1	2.06117	0.1273	downregulated	3	4.04461	0.0175	downregulated	1	0.908599	0.4031	upregulated	2	2.05972	0.1275
acid-thiol ligase activity	GO	4 out of 6	3.10748	downregulated	3	4.49222	0.0112	upregulated	1	0.589359	0.5547	upregulated	4	5.89066	0.0028	downregulated	1	1.01673	0.3618	upregulated	3	3.04556	0.0476	upregulated	1	1.03299	0.3559
amelogenesis	GO	2 out of 6	3.10379	downregulated	2	3.31063	0.0365					downregulated	2	0.676393	0.5084					downregulated	1	0.883239	0.4134
negative regulation of peptidyl-lysine acetylation	GO	3 out of 6	3.10006	downregulated	1	3.38957	0.0337					upregulated	1	2.0275	0.1317	downregulated	1	0.586765	0.5561	upregulated	3	3.06595	0.0466	downregulated	1	1.91471	0.1474
core promoter sequence-specific DNA binding	GO	3 out of 6	3.08836	upregulated	1	0.234643	0.7909	upregulated	1	0.40667	0.6659	upregulated	2	2.56339	0.077	downregulated	3	1.96228	0.1405	upregulated	2	1.93073	0.145	upregulated	1	2.40006	0.0907
isoprenoid binding	GO	3 out of 6	3.08774	upregulated	1	1.45285	0.2339	upregulated	1	0.730283	0.4818	upregulated	3	4.39756	0.0123	downregulated	2	1.73812	0.1759	upregulated	4	3.605	0.0272	upregulated	4	4.3253	0.0132
synaptonemal complex assembly	GO	3 out of 6	3.08349	upregulated	1	0.89606	0.4082	downregulated	1	1.37664	0.2524					downregulated	1	0.813867	0.4431	downregulated	1	1.0613	0.346	upregulated	2	2.85034	0.0578
regulation of integrin-mediated signaling pathway	GO	2 out of 6	3.0788					upregulated	1	3.58182	0.0278	downregulated	2	3.83882	0.0215	downregulated	2	2.82179	0.0595
regulation of cilium assembly	GO	4 out of 6	3.07536	upregulated	5	1.66961	0.1883	downregulated	2	1.46987	0.23	downregulated	9	2.21826	0.1088	downregulated	3	0.493023	0.6108	downregulated	2	1.23862	0.2898	upregulated	1	0.132823	0.8756
bone remodeling	GO	4 out of 6	3.07508	downregulated	1	0.558759	0.5719	upregulated	1	0.729259	0.4823	upregulated	1	1.26297	0.2828	downregulated	1	0.791785	0.453	upregulated	3	0.991753	0.3709	upregulated	3	2.72501	0.0655
energy homeostasis	GO	3 out of 6	3.07275	upregulated	3	3.33527	0.0356	downregulated	2	4.84735	0.0078	downregulated	2	1.04884	0.3503					downregulated	2	1.30772	0.2704	upregulated	2	1.81954	0.1621
fluid transport	GO	2 out of 6	3.06526	upregulated	1	0.320292	0.7259	upregulated	1	3.37797	0.0341									upregulated	2	3.46624	0.0312	upregulated	1	3.29728	0.037
T cell migration	GO	2 out of 6	3.06359																	upregulated	2	1.65006	0.192	upregulated	1	1.41353	0.2433
regulation of cAMP-dependent protein kinase activity	GO	2 out of 6	3.05803	upregulated	1	2.27072	0.1032													upregulated	3	3.57396	0.028	upregulated	1	1.75479	0.1729
mitotic spindle organization	GO	4 out of 6	3.04057	upregulated	5	2.01208	0.1337	upregulated	5	2.53913	0.0789	downregulated	8	2.7902	0.0614	downregulated	4	1.23708	0.2902	upregulated	3	1.07097	0.3427	upregulated	2	0.481455	0.6179
nuclear receptor activity	GO	2 out of 6	3.03508	downregulated	3	1.73583	0.1763	downregulated	2	2.14088	0.1176	downregulated	2	0.0724494	0.9301	upregulated	2	3.68353	0.0251	upregulated	6	1.32382	0.2661	upregulated	4	1.71126	0.1806
isoprenoid biosynthetic process	GO	4 out of 6	3.03222					upregulated	2	4.39283	0.0124	downregulated	1	2.14353	0.1172	downregulated	2	3.63804	0.0263	upregulated	2	1.05829	0.347	upregulated	1	0.585189	0.557
phosphatidylinositol-3,5-bisphosphate phosphatase activity	GO	3 out of 6	3.02687	upregulated	1	0.783858	0.4566					downregulated	2	2.94396	0.0527	downregulated	1	1.01244	0.3633	downregulated	1	2.12371	0.1196	upregulated	1	1.97804	0.1383
regulation of circadian sleep/wake cycle	GO	4 out of 6	3.02431	upregulated	1	1.05776	0.3472	upregulated	1	0.996537	0.3692	downregulated	1	1.05919	0.3467	downregulated	1	1.29004	0.2753	upregulated	2	1.57331	0.2074	upregulated	1	1.15608	0.3147
positive regulation of DNA-dependent DNA replication	GO	2 out of 6	3.0073					downregulated	1	2.30901	0.0994									downregulated	1	1.39072	0.2489	upregulated	1	2.08901	0.1238
organelle disassembly	GO	2 out of 6	2.99298	upregulated	2	0.594905	0.5516	upregulated	1	0.107565	0.898	downregulated	4	1.26691	0.2817	downregulated	4	1.82065	0.1619	downregulated	1	0.241083	0.7858	upregulated	4	2.11588	0.1205
nucleotide transmembrane transport	GO	3 out of 6	2.98362	downregulated	1	1.22612	0.2934	downregulated	2	5.04983	0.0064	upregulated	1	1.04543	0.3515	downregulated	1	1.2478	0.2871	downregulated	1	3.4947	0.0304
nucleotidyltransferase activity	GO	4 out of 6	2.94339	downregulated	3	0.622837	0.5364	upregulated	7	2.77275	0.0625	downregulated	10	1.42329	0.2409	downregulated	8	3.37588	0.0342	downregulated	3	0.449259	0.6381	upregulated	4	0.743384	0.4755
nuclear membrane	GO	3 out of 6	2.94201	upregulated	18	1.96268	0.1405	upregulated	13	3.81862	0.022	downregulated	27	5.62857	0.0036	downregulated	15	5.64009	0.0036	downregulated	15	3.73077	0.024	upregulated	11	1.18542	0.3056
G-rich strand telomeric DNA binding	GO	3 out of 6	2.93964	upregulated	3	3.84764	0.0213	upregulated	1	2.75134	0.0638	downregulated	2	4.00858	0.0182	downregulated	2	3.64548	0.0261	upregulated	1	1.88455	0.1519
mitochondrial outer membrane permeabilization	GO	3 out of 6	2.93833	downregulated	1	1.61172	0.1995													upregulated	1	0.441976	0.6428	upregulated	1	0.884632	0.4129
negative regulation of multicellular organism growth	GO	3 out of 6	2.93523	downregulated	1	3.62434	0.0267					downregulated	1	0.717273	0.4881					downregulated	2	3.57435	0.028	upregulated	1	2.16797	0.1144
oocyte differentiation	GO	5 out of 6	2.93403	downregulated	1	0.566302	0.5676	downregulated	1	0.800429	0.4491	upregulated	1	5.78482	0.0031	downregulated	3	2.51066	0.0812	upregulated	3	2.57958	0.0758	upregulated	1	2.26187	0.1042
sequence-specific single stranded DNA binding	GO	3 out of 6	2.93252	upregulated	3	2.99266	0.0502	upregulated	2	3.11025	0.0446	downregulated	2	3.29168	0.0372	downregulated	2	2.94194	0.0528	upregulated	2	2.80181	0.0607
positive regulation of protein insertion into mitochondrial membrane involved in apoptotic signaling pathway	GO	4 out of 6	2.92112	downregulated	2	1.8526	0.1568	downregulated	1	1.3178	0.2677	upregulated	2	1.62611	0.1967	downregulated	1	0.642298	0.5261	downregulated	1	0.915694	0.4002	upregulated	2	1.65022	0.192
negative regulation of protein acetylation	GO	3 out of 6	2.88549	downregulated	1	3.26551	0.0382					upregulated	1	1.91042	0.148	downregulated	1	0.507299	0.6021	upregulated	3	2.88363	0.0559	downregulated	1	1.86053	0.1556
regulation of chloride transport	GO	3 out of 6	2.88404	downregulated	1	1.62427	0.1971					downregulated	1	1.84747	0.1576	downregulated	1	2.38202	0.0924	downregulated	1	2.96972	0.0513
regulation of store-operated calcium entry	GO	3 out of 6	2.87594	downregulated	1	3.44466	0.0319	upregulated	1	1.1751	0.3088	downregulated	1	2.45583	0.0858	downregulated	1	3.19596	0.0409	downregulated	2	3.11233	0.0445	downregulated	1	1.93307	0.1447
muscle cell cellular homeostasis	GO	2 out of 6	2.86423									downregulated	2	5.28472	0.0051	downregulated	1	3.40074	0.0333	downregulated	2	4.31886	0.0133	downregulated	1	1.50236	0.2226
cellular defense response	GO	3 out of 6	2.84859	upregulated	1	0.186259	0.8301	upregulated	1	3.06764	0.0465	downregulated	6	2.38968	0.0917	downregulated	4	3.86824	0.0209	upregulated	3	0.305963	0.7364	downregulated	1	0.461397	0.6304
inhibition of cysteine-type endopeptidase activity	GO	3 out of 6	2.84802	upregulated	1	0.801191	0.4488									downregulated	1	1.26608	0.2819	upregulated	1	1.05874	0.3469	upregulated	1	1.32439	0.266
transmembrane receptor protein tyrosine kinase adaptor activity	GO	2 out of 6	2.82861	upregulated	1	1.95865	0.141					upregulated	1	1.55864	0.2104					upregulated	1	1.57207	0.2076	upregulated	1	1.25654	0.2846
midbrain dopaminergic neuron differentiation	GO	2 out of 6	2.8283																	upregulated	1	0.945782	0.3884	upregulated	1	1.88252	0.1522
cranial skeletal system development	GO	3 out of 6	2.81816	upregulated	1	2.36028	0.0944					downregulated	9	4.32124	0.0133	downregulated	3	1.0805	0.3394	upregulated	8	1.52727	0.2171	downregulated	2	1.75056	0.1737
cerebellar Purkinje cell layer formation	GO	1 out of 6	2.80367									downregulated	2	2.80367	0.0606
regulation of cell cycle G2/M phase transition	GO	3 out of 6	2.78672	upregulated	14	3.57505	0.028	upregulated	14	8.38774	0.0002	downregulated	21	10.3029	3.4e-05	downregulated	10	3.57126	0.0281	downregulated	7	1.81532	0.1628	upregulated	6	0.8753	0.4167
regulation of NIK/NF-kappaB signaling	GO	3 out of 6	2.77372	upregulated	4	1.66439	0.1893	upregulated	5	4.83869	0.0079	downregulated	10	3.57049	0.0281	downregulated	9	6.234	0.002	upregulated	6	0.787413	0.455	downregulated	3	1.3151	0.2684
signal transduction involved in cell cycle checkpoint	GO	3 out of 6	2.7667	upregulated	2	0.0535668	0.9478	upregulated	7	4.45687	0.0116	downregulated	9	4.97281	0.0069	downregulated	5	2.38053	0.0925	upregulated	8	1.54518	0.2133	downregulated	3	1.62139	0.1976
mitotic chromosome condensation	GO	3 out of 6	2.75636	upregulated	1	0.79293	0.4525	upregulated	2	3.42924	0.0324	downregulated	3	2.45105	0.0862					upregulated	1	1.40476	0.2454	upregulated	2	3.12272	0.044
regulation of DNA biosynthetic process	GO	3 out of 6	2.75327	upregulated	8	3.51484	0.0298	upregulated	5	2.81995	0.0596	downregulated	10	6.12263	0.0022	downregulated	7	5.20503	0.0055	downregulated	8	6.05933	0.0023	upregulated	4	0.999776	0.368
presynaptic membrane organization	GO	2 out of 6	2.74821	upregulated	1	1.28865	0.2756					downregulated	3	7.02727	0.0009	upregulated	1	3.72436	0.0241	upregulated	1	0.733946	0.48
regulation of embryonic development	GO	3 out of 6	2.72929	upregulated	8	2.5924	0.0748	upregulated	3	2.54277	0.0786	downregulated	12	2.94307	0.0527	downregulated	2	1.88963	0.1511	downregulated	4	1.51024	0.2209	upregulated	7	4.54199	0.0107
homophilic cell adhesion via plasma membrane adhesion molecules	GO	4 out of 6	2.72486	upregulated	8	4.46115	0.0115	downregulated	3	1.50298	0.2225	upregulated	5	3.08682	0.0456	downregulated	3	2.621	0.0727	upregulated	8	4.63903	0.0097	upregulated	2	1.50982	0.2209
regulation of female gonad development	GO	3 out of 6	2.72482									downregulated	1	2.11974	0.1201	downregulated	1	2.02506	0.132	upregulated	1	0.816216	0.4421	downregulated	1	2.2362	0.1069
regulation of fertilization	GO	2 out of 6	2.70829									downregulated	2	2.27079	0.1032	upregulated	1	2.03509	0.1307					upregulated	1	2.4726	0.0844
chloride transmembrane transport	GO	3 out of 6	2.66241	upregulated	6	5.71007	0.0033	upregulated	3	1.19729	0.302	downregulated	7	4.72812	0.0088	downregulated	6	4.81231	0.0081	upregulated	2	0.0293466	0.9711
CD40 receptor complex	GO	2 out of 6	2.65835	upregulated	1	1.23234	0.2916					upregulated	1	2.16087	0.1152	downregulated	2	3.14357	0.0431	upregulated	1	0.747121	0.4737
nail development	GO	1 out of 6	2.65338	downregulated	1	2.65338	0.0704
chemical homeostasis within a tissue	GO	1 out of 6	2.64366	downregulated	1	4.59911	0.0101					upregulated	1	1.95545	0.1415
CatSper complex	GO	1 out of 6	2.62523									downregulated	1	2.62523	0.0724
nerve growth factor signaling pathway	GO	3 out of 6	2.62317	upregulated	1	1.28865	0.2756					downregulated	1	1.00685	0.3654	downregulated	1	1.95216	0.142	upregulated	1	0.952803	0.3857
negative regulation of endoplasmic reticulum stress-induced intrinsic apoptotic signaling pathway	GO	2 out of 6	2.61997	upregulated	1	1.01904	0.3609	downregulated	2	3.46905	0.0311									downregulated	1	1.12544	0.3245	upregulated	1	1.29541	0.2738
regulation of dendrite extension	GO	2 out of 6	2.59406					downregulated	1	2.87381	0.0565	upregulated	2	2.66089	0.0699	downregulated	3	3.53564	0.0291	downregulated	1	1.15451	0.3152
positive regulation of gene silencing by miRNA	GO	3 out of 6	2.59368	downregulated	1	0.807404	0.446					downregulated	4	1.90175	0.1493	downregulated	1	0.615894	0.5402	downregulated	1	0.700361	0.4964	upregulated	1	0.776389	0.4601
phosphotransferase activity, phosphate group as acceptor	GO	4 out of 6	2.57988	upregulated	3	3.17125	0.042					downregulated	3	2.23459	0.107	downregulated	1	1.74539	0.1746	upregulated	2	0.903108	0.4053	upregulated	1	0.868039	0.4198
regulation of exosomal secretion	GO	3 out of 6	2.57386	upregulated	1	1.18004	0.3073	upregulated	1	0.904103	0.4049					downregulated	1	1.38792	0.2496	upregulated	1	2.09662	0.1229	upregulated	1	1.17347	0.3093
embryonic cranial skeleton morphogenesis	GO	3 out of 6	2.57254	upregulated	1	2.87459	0.0564					downregulated	8	4.53862	0.0107	downregulated	2	1.33025	0.2644	upregulated	5	1.79865	0.1655	downregulated	2	2.22039	0.1086
G-protein coupled peptide receptor activity	GO	4 out of 6	2.57226	upregulated	3	5.27374	0.0051	upregulated	4	6.18352	0.0021	downregulated	6	4.43962	0.0118	downregulated	3	3.64096	0.0262	upregulated	5	3.27195	0.0379	upregulated	3	2.677	0.0688
translation initiation factor binding	GO	3 out of 6	2.566					upregulated	2	1.00863	0.3647	downregulated	1	0.0953986	0.909					upregulated	2	0.37176	0.6895	upregulated	3	3.10747	0.0447
photoreceptor disc membrane	GO	3 out of 6	2.56068									downregulated	1	1.14192	0.3192	downregulated	1	1.4898	0.2254	downregulated	1	0.903147	0.4053	upregulated	1	0.832101	0.4351
synapse organization	GO	4 out of 6	2.55245	upregulated	13	9.77263	5.7e-05	downregulated	5	2.384	0.0922	downregulated	17	8.35276	0.0002	downregulated	8	2.84278	0.0583	downregulated	8	4.68762	0.0092	upregulated	7	3.43315	0.0323
meiotic cell cycle	GO	3 out of 6	2.54921	upregulated	8	0.763196	0.4662	upregulated	11	3.30276	0.0368	downregulated	13	1.71834	0.1794	downregulated	8	1.34151	0.2615	upregulated	15	3.55533	0.0286	downregulated	4	2.81814	0.0597
response to carbohydrate	GO	3 out of 6	2.53957	downregulated	3	4.23207	0.0145	upregulated	7	3.73184	0.0239	downregulated	13	3.54748	0.0288	upregulated	4	4.75076	0.0086	upregulated	8	1.15493	0.3151	downregulated	5	2.66306	0.0697
protein phosphatase inhibitor activity	GO	2 out of 6	2.53459	upregulated	3	3.57453	0.028	upregulated	1	1.27936	0.2782									upregulated	3	1.87667	0.1531	upregulated	1	0.657928	0.5179
positive regulation of stem cell proliferation	GO	2 out of 6	2.53153	downregulated	3	3.07031	0.0464	upregulated	3	4.96259	0.007	upregulated	1	0.794101	0.452	upregulated	1	1.4557	0.2332	upregulated	4	3.63958	0.0263	upregulated	4	6.10434	0.0022
negative regulation of mesenchymal cell apoptotic process	GO	3 out of 6	2.52732	downregulated	1	1.41175	0.2437					downregulated	1	0.709183	0.492					upregulated	1	0.406391	0.666
microtubule associated complex	GO	2 out of 6	2.51359	downregulated	4	2.28662	0.1016	upregulated	10	6.45948	0.0016	downregulated	20	8.03539	0.0003	downregulated	11	4.78375	0.0084	upregulated	8	1.76838	0.1706	upregulated	4	0.745203	0.4746
endodermal cell differentiation	GO	3 out of 6	2.50584	upregulated	1	1.58513	0.2049					downregulated	1	2.09144	0.1235	downregulated	2	3.8008	0.0224	downregulated	1	3.01067	0.0493	upregulated	2	1.2094	0.2984
regulation of protein secretion	GO	2 out of 6	2.50536	downregulated	12	2.25698	0.1047	upregulated	11	2.35297	0.0951	upregulated	10	2.01992	0.1327	downregulated	19	8.91908	0.0001	downregulated	7	2.10362	0.122	downregulated	9	2.19419	0.1114
ciliary transition fiber	GO	3 out of 6	2.49059	upregulated	1	1.83137	0.1602					upregulated	1	1.36295	0.2559	downregulated	2	2.43436	0.0877	upregulated	1	1.16916	0.3106	upregulated	1	2.08139	0.1248
platelet activation	GO	4 out of 6	2.4902	upregulated	5	1.40952	0.2443	upregulated	5	4.71635	0.0089	downregulated	11	4.28129	0.0138	downregulated	7	2.26965	0.1033	upregulated	6	1.72767	0.1777	upregulated	1	0.337457	0.7136
calcium-dependent protein binding	GO	5 out of 6	2.45651	downregulated	1	0.709599	0.4918	downregulated	1	0.520566	0.5942	downregulated	5	2.80547	0.0605	downregulated	3	1.88824	0.1513	downregulated	3	4.90097	0.0074	upregulated	2	1.43361	0.2384
FMN binding	GO	2 out of 6	2.38392									downregulated	2	2.87459	0.0564	downregulated	1	1.3364	0.2628					downregulated	1	1.82708	0.1609
negative regulation of autophagosome assembly	GO	2 out of 6	2.37857					upregulated	1	0.977783	0.3761	downregulated	1	0.767381	0.4642	downregulated	2	2.58897	0.0751
lymphocyte migration	GO	4 out of 6	2.36777	downregulated	2	1.66779	0.1887	upregulated	1	1.19732	0.302					downregulated	1	0.900152	0.4065	upregulated	2	0.386731	0.6793	upregulated	1	0.610417	0.5431
sulfate transmembrane transport	GO	2 out of 6	2.3551	upregulated	1	1.15269	0.3158					downregulated	2	2.66613	0.0695					upregulated	1	0.841657	0.431
hormone receptor binding	GO	3 out of 6	2.3422	upregulated	6	0.480356	0.6186	upregulated	5	0.303061	0.7386	downregulated	16	3.18753	0.0413	upregulated	5	5.45249	0.0043	upregulated	21	2.24224	0.1062	upregulated	11	3.14833	0.0429
multicellular organism growth	GO	4 out of 6	2.3353	downregulated	4	3.05441	0.0472	downregulated	2	3.06777	0.0465	upregulated	1	5.9431	0.0026	upregulated	1	1.41803	0.2422	upregulated	8	1.5791	0.2062	upregulated	4	1.99514	0.136
response to pain	GO	4 out of 6	2.32818					upregulated	1	3.11637	0.0443	downregulated	3	0.930392	0.3944	downregulated	2	1.9185	0.1468	upregulated	1	1.21014	0.2982	upregulated	1	1.38551	0.2502
regulation of cellular response to drug	GO	4 out of 6	2.32408	downregulated	2	1.58603	0.2047	upregulated	2	4.4119	0.0121	downregulated	4	4.01536	0.018	downregulated	1	1.88058	0.1525	downregulated	3	4.01543	0.018	upregulated	3	3.26944	0.038
negative regulation of NIK/NF-kappaB signaling	GO	4 out of 6	2.31211	downregulated	1	0.950045	0.3867	upregulated	1	0.726799	0.4835	downregulated	1	0.29479	0.7447					upregulated	1	0.624271	0.5357	upregulated	1	1.1698	0.3104
renal filtration	GO	2 out of 6	2.31086									downregulated	2	2.4717	0.0844	downregulated	1	1.92986	0.1452					downregulated	1	2.0907	0.1236
synaptic vesicle transport	GO	4 out of 6	2.30363	upregulated	6	3.62746	0.0266	downregulated	1	0.370782	0.6902	downregulated	5	3.22584	0.0397	downregulated	5	2.26635	0.1037	upregulated	3	1.92585	0.1458	downregulated	2	1.85774	0.156
phosphatidylinositol-4,5-bisphosphate phosphatase activity	GO	4 out of 6	2.30273	upregulated	3	3.38613	0.0338	downregulated	1	1.51458	0.2199	downregulated	1	1.96285	0.1405	downregulated	1	1.21701	0.2961	downregulated	1	2.62886	0.0722	upregulated	1	0.994419	0.3699
clathrin-coated pit	GO	1 out of 6	2.28758	downregulated	3	2.17161	0.114	downregulated	3	1.57871	0.2062	downregulated	8	8.02582	0.0003	downregulated	7	4.66906	0.0094	downregulated	5	4.79128	0.0083	upregulated	3	2.28758	0.1015
dendrite morphogenesis	GO	3 out of 6	2.25964	downregulated	4	5.1353	0.0059	downregulated	3	3.29602	0.037	upregulated	4	1.93787	0.144	upregulated	2	3.03526	0.0481	downregulated	2	3.64651	0.0261	upregulated	5	2.44796	0.0865
FAD binding	GO	3 out of 6	2.25179	downregulated	1	1.09998	0.3329	downregulated	3	6.73311	0.0012	upregulated	1	1.25898	0.2839	upregulated	2	3.65798	0.0258	downregulated	3	3.42906	0.0324	upregulated	2	2.76471	0.063
phospholipase inhibitor activity	GO	1 out of 6	2.23715	upregulated	1	1.638	0.1944													upregulated	1	2.23715	0.1068
sensory perception of mechanical stimulus	GO	3 out of 6	2.22798	upregulated	9	3.47676	0.0309	upregulated	4	2.40727	0.0901	downregulated	12	6.23835	0.002	upregulated	1	1.95607	0.1414	upregulated	5	1.82398	0.1614	upregulated	5	2.00575	0.1346
negative regulation of double-strand break repair	GO	3 out of 6	2.22727	upregulated	1	0.339362	0.7122					downregulated	2	0.882873	0.4136	downregulated	2	1.57286	0.2075	upregulated	2	2.11392	0.1208	downregulated	1	2.00302	0.1349
immunoglobulin complex, circulating	GO	1 out of 6	2.22696	downregulated	2	3.49595	0.0303																	downregulated	1	1.26898	0.2811
synaptic vesicle localization	GO	4 out of 6	2.216	upregulated	6	3.60336	0.0272	downregulated	1	0.362698	0.6958	downregulated	5	3.17071	0.042	downregulated	5	2.21822	0.1088	upregulated	3	1.89245	0.1507	downregulated	2	1.82472	0.1613
negative regulation of glycoprotein metabolic process	GO	3 out of 6	2.20854	downregulated	1	3.78003	0.0228	upregulated	1	1.90649	0.1486	upregulated	1	2.26571	0.1038	downregulated	1	0.983362	0.3741					upregulated	1	1.61734	0.1984
regulation of lymphocyte chemotaxis	GO	2 out of 6	2.20683									upregulated	1	2.43634	0.0875	upregulated	1	2.04309	0.1296	upregulated	2	1.28058	0.2779	upregulated	4	5.40568	0.0045
dendritic spine maintenance	GO	2 out of 6	2.20322									downregulated	2	4.19654	0.015	downregulated	2	2.5958	0.0746	downregulated	1	2.75301	0.0637	downregulated	1	1.83611	0.1594
negative regulation of double-strand break repair via homologous recombination	GO	2 out of 6	2.18609	upregulated	1	0.74698	0.4738					downregulated	2	1.80606	0.1643	downregulated	1	1.127	0.324
transferase activity, transferring alkyl or aryl (other than methyl) groups	GO	3 out of 6	2.18185	upregulated	2	1.06753	0.3439	upregulated	4	2.80057	0.0608	downregulated	5	3.58848	0.0276	downregulated	5	5.73185	0.0032	upregulated	5	2.36898	0.0936	downregulated	1	5.63935	0.0036
beta-catenin destruction complex disassembly	GO	4 out of 6	2.17851					upregulated	1	3.08654	0.0457	downregulated	2	1.26691	0.2817	downregulated	1	1.02602	0.3584	upregulated	3	2.06961	0.1262	upregulated	1	0.90251	0.4056
site of DNA damage	GO	3 out of 6	2.15243	upregulated	3	0.97078	0.3788	upregulated	3	1.14507	0.3182	downregulated	3	0.311974	0.732	downregulated	5	3.25348	0.0386	upregulated	4	1.76653	0.1709	downregulated	1	1.0637	0.3452
nitric oxide metabolic process	GO	1 out of 6	2.14766													downregulated	1	3.57293	0.0281					downregulated	1	1.42527	0.2404
positive regulation of response to wounding	GO	4 out of 6	2.13823	downregulated	3	1.7009	0.1825	upregulated	3	2.96833	0.0514	downregulated	5	3.61033	0.027	downregulated	3	1.00677	0.3654	downregulated	1	1.59007	0.2039	upregulated	1	0.378629	0.6848
chromatin DNA binding	GO	3 out of 6	2.13466	upregulated	7	2.18303	0.1127	upregulated	3	0.676893	0.5082	downregulated	12	2.1319	0.1186	upregulated	1	1.89101	0.1509	upregulated	10	2.68871	0.068	upregulated	5	2.06498	0.1268
Lys48-specific deubiquitinase activity	GO	3 out of 6	2.13044	downregulated	1	2.10946	0.1213	downregulated	1	1.3412	0.2615	upregulated	1	1.35964	0.2568	downregulated	1	1.87746	0.153					downregulated	1	1.83804	0.1591
sialylation	GO	2 out of 6	2.12984	upregulated	1	2.10356	0.122	upregulated	1	2.26227	0.1041	downregulated	4	2.85892	0.0573	downregulated	2	5.12149	0.006	downregulated	1	1.48473	0.2266
site of double-strand break	GO	2 out of 6	2.11936	upregulated	3	1.29758	0.2732	upregulated	3	1.60264	0.2014	upregulated	1	0.382569	0.6821	downregulated	4	3.1538	0.0427	upregulated	4	2.24835	0.1056
positive regulation of fertilization	GO	2 out of 6	2.11765									downregulated	1	1.42455	0.2406	upregulated	1	2.60213	0.0741					upregulated	1	3.29524	0.0371
regulation of endoplasmic reticulum unfolded protein response	GO	3 out of 6	2.10633					upregulated	1	0.433197	0.6484	downregulated	4	2.74036	0.0645	downregulated	2	1.34212	0.2613	downregulated	1	2.48605	0.0832	upregulated	1	0.943105	0.3894
histone H3-K9 modification	GO	2 out of 6	2.10408	upregulated	2	2.34066	0.0963	upregulated	1	1.20028	0.3011					downregulated	1	1.14121	0.3194	upregulated	2	4.5038	0.0111
membrane repolarization during action potential	GO	2 out of 6	2.09698					upregulated	1	1.49829	0.2235	downregulated	1	2.10689	0.1216					upregulated	2	1.48839	0.2257
membrane repolarization during cardiac muscle cell action potential	GO	2 out of 6	2.09698					upregulated	1	1.49829	0.2235	downregulated	1	2.10689	0.1216					upregulated	2	1.48839	0.2257
regulation of neuron migration	GO	4 out of 6	2.09154	upregulated	3	3.53828	0.0291					downregulated	4	2.75798	0.0634	downregulated	1	0.600528	0.5485	upregulated	4	1.81953	0.1621	upregulated	1	0.451787	0.6365
cysteine-type endopeptidase inhibitor activity involved in apoptotic process	GO	3 out of 6	2.08031	upregulated	2	1.10745	0.3304					downregulated	1	0.819556	0.4406	downregulated	2	1.96068	0.1408	upregulated	1	0.407523	0.6653
enhancer sequence-specific DNA binding	GO	4 out of 6	2.07539	upregulated	3	2.97774	0.0509	downregulated	1	2.38937	0.0917	upregulated	3	0.873644	0.4174	downregulated	4	1.0914	0.3357	upregulated	10	1.2535	0.2855	upregulated	6	1.1925	0.3035
ATP hydrolysis coupled anion transmembrane transport	GO	2 out of 6	2.06419	downregulated	1	2.52805	0.0798	downregulated	1	2.68878	0.068	downregulated	1	1.35801	0.2572					downregulated	1	1.82186	0.1617
protein N-terminus binding	GO	4 out of 6	2.04668	upregulated	6	2.37348	0.0932	upregulated	7	4.18569	0.0152	downregulated	12	3.7063	0.0246	downregulated	7	3.44975	0.0318	upregulated	5	0.400352	0.6701	upregulated	5	1.04944	0.3501
signal transduction involved in DNA damage checkpoint	GO	3 out of 6	2.04326	upregulated	2	0.0566625	0.9449	upregulated	7	4.5134	0.011	downregulated	9	5.08159	0.0062	downregulated	5	2.43174	0.0879	upregulated	7	0.763149	0.4662	downregulated	3	1.66316	0.1895
regulation of dendritic cell differentiation	GO	2 out of 6	2.03578									downregulated	1	1.0102	0.3641					upregulated	1	1.02558	0.3586
cysteine-type endopeptidase activity involved in apoptotic process	GO	3 out of 6	2.035	downregulated	1	1.67641	0.187	upregulated	1	0.874924	0.4169	upregulated	1	0.852954	0.4262	downregulated	1	1.87014	0.1541	upregulated	1	0.216326	0.8055
fibrillar collagen trimer	GO	1 out of 6	2.03286	downregulated	1	1.24735	0.2873									downregulated	1	0.803404	0.4478	upregulated	2	2.03286	0.131
Golgi vesicle transport	GO	4 out of 6	2.00905	downregulated	6	1.35555	0.2578	upregulated	15	1.19134	0.3038	downregulated	27	1.94947	0.1424	downregulated	16	2.40102	0.0906	downregulated	16	3.78057	0.0228	upregulated	11	1.27493	0.2795
phosphoprotein phosphatase activity	GO	1 out of 6	2.00612	upregulated	17	3.2025	0.0407	upregulated	6	0.892983	0.4094	downregulated	20	4.15769	0.0156	upregulated	2	1.2374	0.2901	downregulated	6	1.86605	0.1547	upregulated	9	3.87217	0.0208
desmosome organization	GO	2 out of 6	1.99704	upregulated	1	2.01684	0.1331					downregulated	1	1.25852	0.2841									upregulated	1	2.75535	0.0636
carboxylic acid transport	GO	3 out of 6	1.98465	upregulated	11	3.4048	0.0332	upregulated	7	1.3178	0.2677	upregulated	10	7.81942	0.0004	downregulated	9	2.72607	0.0655	upregulated	21	5.31926	0.0049	upregulated	14	6.48134	0.0015
organic acid transport	GO	3 out of 6	1.98465	upregulated	11	3.4048	0.0332	upregulated	7	1.3178	0.2677	upregulated	10	7.81942	0.0004	downregulated	9	2.72607	0.0655	upregulated	21	5.31926	0.0049	upregulated	14	6.48134	0.0015
SNAP receptor activity	GO	2 out of 6	1.98402	downregulated	1	1.43696	0.2376	upregulated	3	1.93857	0.1439	downregulated	2	0.392755	0.6752	downregulated	1	0.586911	0.556	upregulated	2	0.743716	0.4753	upregulated	2	1.2403	0.2893
membrane repolarization	GO	2 out of 6	1.97522					upregulated	1	1.36754	0.2547	downregulated	1	1.96682	0.1399					upregulated	2	1.37594	0.2526
transcriptional activator activity, RNA polymerase II distal enhancer sequence-specific DNA binding	GO	3 out of 6	1.9627	upregulated	2	4.32718	0.0132					downregulated	3	1.80602	0.1643	downregulated	3	2.44945	0.0863	upregulated	3	2.0344	0.1308
GTPase inhibitor activity	GO	1 out of 6	1.96002									downregulated	2	2.19231	0.1117	downregulated	2	2.68101	0.0685	upregulated	2	1.96002	0.1409
eosinophil migration	GO	3 out of 6	1.95575	downregulated	1	2.49718	0.0823					upregulated	1	2.69553	0.0675					upregulated	1	0.787293	0.4551	upregulated	1	1.36681	0.2549
cellular aldehyde metabolic process	GO	2 out of 6	1.94638	downregulated	2	0.822319	0.4394	upregulated	5	2.61505	0.0732	upregulated	2	1.50222	0.2226	downregulated	6	6.45841	0.0016	upregulated	3	1.49354	0.2246	upregulated	2	0.452839	0.6358
replicative senescence	GO	2 out of 6	1.9206					upregulated	1	1.8698	0.1542	downregulated	2	2.74256	0.0644	downregulated	1	2.6801	0.0686					downregulated	1	1.63226	0.1955
cerebellar cortex development	GO	3 out of 6	1.91135					upregulated	1	0.545706	0.5794	upregulated	1	1.38191	0.2511	downregulated	1	0.457863	0.6326	upregulated	4	2.00272	0.135	upregulated	1	1.37837	0.252
transmission of nerve impulse	GO	3 out of 6	1.90819	upregulated	2	1.82362	0.1614					downregulated	4	2.77569	0.0623	downregulated	3	3.61382	0.0269	upregulated	3	1.48884	0.2256	downregulated	3	4.14654	0.0158
endosomal transport	GO	2 out of 6	1.90535	upregulated	13	3.12298	0.044	upregulated	8	1.36883	0.2544	upregulated	10	4.98914	0.0068	downregulated	14	4.28182	0.0138	upregulated	16	4.02466	0.0179	upregulated	12	7.36165	0.0006
regulation of epithelial cell differentiation involved in kidney development	GO	3 out of 6	1.89242	upregulated	1	0.797152	0.4506	upregulated	1	2.59257	0.0748	upregulated	1	1.72596	0.178	downregulated	1	2.09741	0.1228	upregulated	2	2.82539	0.0593	upregulated	1	2.08531	0.1243
phosphatidylinositol monophosphate phosphatase activity	GO	3 out of 6	1.85661	upregulated	1	0.668441	0.5125					downregulated	2	2.55084	0.078	upregulated	1	3.19648	0.0409	upregulated	1	1.24558	0.2878	upregulated	1	1.92511	0.1459
signal transduction in response to DNA damage	GO	4 out of 6	1.84519	downregulated	1	1.79531	0.1661	upregulated	8	3.4851	0.0307	downregulated	10	3.53247	0.0292	downregulated	5	1.38032	0.2515	upregulated	8	0.397869	0.6717	downregulated	4	1.77568	0.1694
cobalamin binding	GO	1 out of 6	1.83314													downregulated	1	1.83314	0.1599
atrial cardiac muscle cell action potential	GO	2 out of 6	1.83186	upregulated	1	2.71818	0.066					upregulated	1	1.12946	0.3232					upregulated	1	2.99036	0.0503	upregulated	1	2.68914	0.0679
cytoskeleton-dependent cytokinesis	GO	2 out of 6	1.81606	upregulated	4	1.44579	0.2356	upregulated	2	0.386726	0.6793	downregulated	8	4.62408	0.0098	downregulated	5	1.65868	0.1904	downregulated	3	1.21861	0.2956	downregulated	2	1.41558	0.2428
detection of light stimulus involved in sensory perception	GO	2 out of 6	1.80083	upregulated	1	2.02349	0.1322					downregulated	1	1.94832	0.1425	downregulated	1	1.876	0.1532
RNA polymerase II activity	GO	1 out of 6	1.78356									downregulated	1	1.78356	0.168
Flemming body	GO	4 out of 6	1.78158	upregulated	3	2.72405	0.0656	upregulated	3	3.1425	0.0432	downregulated	2	1.41725	0.2424	downregulated	2	1.89468	0.1504	upregulated	2	2.32665	0.0976	upregulated	2	2.00955	0.134
protein phosphatase regulator activity	GO	4 out of 6	1.77584	upregulated	7	3.66187	0.0257	upregulated	3	1.56549	0.209	downregulated	4	1.08085	0.3393	downregulated	5	3.749	0.0235	upregulated	6	1.44567	0.2356	upregulated	2	0.727687	0.483
replisome	GO	4 out of 6	1.77482	upregulated	2	2.05941	0.1275	upregulated	3	2.9886	0.0504	downregulated	3	1.97805	0.1383	downregulated	3	3.03116	0.0483	upregulated	1	1.01723	0.3616	upregulated	1	0.796387	0.451
plasma membrane raft	GO	3 out of 6	1.74419	upregulated	4	2.24313	0.1061	upregulated	5	8.77123	0.0002	downregulated	11	7.23228	0.0007	downregulated	6	5.23147	0.0053	upregulated	7	3.3949	0.0335	downregulated	3	3.10011	0.045
isoprenoid metabolic process	GO	4 out of 6	1.73623	downregulated	1	1.25428	0.2853	upregulated	8	5.67352	0.0034	downregulated	4	3.09501	0.0453	downregulated	4	1.88938	0.1512	upregulated	9	3.61344	0.027	downregulated	3	2.44236	0.087
positive regulation of vascular smooth muscle cell proliferation	GO	3 out of 6	1.73506	upregulated	2	1.17139	0.3099					upregulated	1	0.5312	0.5879	downregulated	1	0.94824	0.3874	upregulated	2	0.966149	0.3805	upregulated	1	1.52326	0.218
phosphatidylinositol acyl-chain remodeling	GO	1 out of 6	1.73117									downregulated	1	1.73117	0.1771
core promoter binding	GO	3 out of 6	1.71922	upregulated	2	0.367639	0.6924	upregulated	2	0.864723	0.4212	upregulated	2	2.12272	0.1197	downregulated	3	1.30829	0.2703	upregulated	2	1.65355	0.1914	upregulated	1	2.11247	0.1209
negative regulation of viral release from host cell	GO	2 out of 6	1.70609	upregulated	2	1.68551	0.1854	upregulated	1	0.747067	0.4738									upregulated	1	1.33044	0.2644	upregulated	2	2.80823	0.0603
U2-type spliceosomal complex	GO	2 out of 6	1.69584	upregulated	2	2.03378	0.1308	upregulated	6	3.96377	0.019	upregulated	2	1.99	0.1367	downregulated	2	0.456419	0.6335	upregulated	3	0.698718	0.4972	upregulated	2	0.997122	0.3689
skeletal muscle cell differentiation	GO	4 out of 6	1.67075	upregulated	4	6.54873	0.0014					downregulated	4	1.94242	0.1434	downregulated	3	3.07761	0.0461	upregulated	3	2.29016	0.1013	upregulated	1	0.909284	0.4028
vitamin metabolic process	GO	3 out of 6	1.66889	upregulated	2	0.135429	0.8733	downregulated	3	1.84122	0.1586	downregulated	6	3.07828	0.046	upregulated	3	2.67273	0.0691	downregulated	6	3.76237	0.0232	upregulated	5	3.31992	0.0362
beta-catenin-TCF complex	GO	3 out of 6	1.65925	downregulated	1	1.07196	0.3423	upregulated	1	0.906972	0.4037	upregulated	1	1.1345	0.3216					upregulated	3	1.93246	0.1448	upregulated	1	0.696299	0.4984
regulation of podosome assembly	GO	3 out of 6	1.63146					upregulated	1	2.41038	0.0898	downregulated	2	2.07731	0.1253	downregulated	1	1.29699	0.2734	upregulated	2	2.5257	0.08	downregulated	1	1.85816	0.156
response to gravity	GO	2 out of 6	1.59973									downregulated	1	1.9445	0.1431	downregulated	1	2.85317	0.0577	downregulated	1	3.19794	0.0408
filamentous actin	GO	2 out of 6	1.58744	upregulated	1	1.39345	0.2482	upregulated	2	1.90862	0.1483	upregulated	1	1.75386	0.1731	upregulated	1	1.37801	0.2521	upregulated	4	4.03775	0.0176	upregulated	1	3.98363	0.0186
excretion	GO	4 out of 6	1.58435					downregulated	1	2.31471	0.0988	upregulated	4	4.88257	0.0076	downregulated	2	1.6762	0.1871	upregulated	2	1.19481	0.3028	upregulated	2	1.2812	0.2777
defense response to virus	GO	4 out of 6	1.57411	downregulated	6	1.78871	0.1672	upregulated	14	12.1602	5.2e-06	downregulated	14	4.09093	0.0167	downregulated	10	6.20098	0.002	upregulated	10	2.50627	0.0816	downregulated	2	0.852559	0.4263
cyclic nucleotide binding	GO	3 out of 6	1.57177	downregulated	1	2.19944	0.1109					downregulated	3	2.144	0.1172	upregulated	1	1.3485	0.2596	upregulated	2	1.11	0.3296	downregulated	2	2.53316	0.0794
fucosylation	GO	2 out of 6	1.56506													downregulated	1	1.95673	0.1413	upregulated	2	0.874107	0.4172	downregulated	1	1.26578	0.282
cell trailing edge	GO	2 out of 6	1.55551									downregulated	1	1.28972	0.2753	downregulated	2	2.7595	0.0633	downregulated	2	2.49371	0.0826
ciliary base	GO	4 out of 6	1.55306	upregulated	3	2.51867	0.0806	upregulated	2	4.11644	0.0163	downregulated	1	0.158041	0.8538	downregulated	1	0.606264	0.5454	upregulated	5	4.30595	0.0135	upregulated	2	3.11791	0.0442
positive regulation of anion transport	GO	2 out of 6	1.54304	upregulated	3	1.14051	0.3197	upregulated	3	1.50695	0.2216	downregulated	4	3.13943	0.0433	downregulated	3	3.47825	0.0309	downregulated	2	1.26759	0.2815	downregulated	1	1.15959	0.3136
female gamete generation	GO	4 out of 6	1.53155	downregulated	3	0.805043	0.4471	downregulated	1	0.188159	0.8285	upregulated	2	4.70372	0.0091	upregulated	1	3.46225	0.0314	upregulated	8	3.27601	0.0378	upregulated	5	5.4283	0.0044
synaptic vesicle recycling	GO	3 out of 6	1.51795	upregulated	3	2.32915	0.0974					upregulated	2	1.31492	0.2685	downregulated	2	1.12094	0.326	upregulated	4	3.09153	0.0454	upregulated	1	0.949549	0.3869
cytokine activity	GO	1 out of 6	1.51316	downregulated	9	4.74326	0.0087	upregulated	3	3.59903	0.0274	downregulated	8	2.26631	0.1037	downregulated	5	2.91303	0.0543	downregulated	3	0.179209	0.8359	upregulated	6	1.69237	0.1841
tethering complex	GO	3 out of 6	1.47998	upregulated	3	1.37028	0.254	downregulated	2	3.38401	0.0339	downregulated	4	1.01213	0.3634	upregulated	2	1.90853	0.1483	downregulated	2	1.09347	0.3351	upregulated	3	1.45611	0.2331
negative regulation of secretion by cell	GO	5 out of 6	1.47552	downregulated	4	0.468024	0.6262	upregulated	6	9.49402	7.5e-05	downregulated	10	1.61597	0.1987	downregulated	8	3.30397	0.0367	upregulated	10	3.7118	0.0244	upregulated	8	1.86978	0.1542
negative regulation of sodium ion transmembrane transporter activity	GO	1 out of 6	1.47375					downregulated	1	3.41185	0.033									downregulated	1	1.9381	0.144
positive regulation of amyloid precursor protein catabolic process	GO	2 out of 6	1.46892									downregulated	1	1.81978	0.1621	downregulated	2	3.20684	0.0405	downregulated	2	2.46898	0.0847	downregulated	2	3.55769	0.0285
regulation of establishment of endothelial barrier	GO	2 out of 6	1.45807	upregulated	1	1.657	0.1907					downregulated	1	1.33362	0.2635					upregulated	2	1.78145	0.1684
oxidoreductase activity, acting on single donors with incorporation of molecular oxygen, incorporation of two atoms of oxygen	GO	3 out of 6	1.44887	downregulated	1	3.8895	0.0205	upregulated	1	2.28139	0.1021	downregulated	2	2.25318	0.1051	downregulated	1	4.53655	0.0107	downregulated	1	2.32094	0.0982	downregulated	1	4.62803	0.0098
negative regulation of sodium ion transmembrane transport	GO	1 out of 6	1.44151					downregulated	1	3.37961	0.0341									downregulated	1	1.9381	0.144
RNA polymerase III activity	GO	2 out of 6	1.4061	downregulated	1	1.33916	0.2621	upregulated	1	1.34281	0.2611	downregulated	1	1.40975	0.2442
oxidoreductase activity, acting on paired donors, with incorporation or reduction of molecular oxygen, reduced flavin or flavoprotein as one donor, and incorporation of one atom of oxygen	GO	3 out of 6	1.40074	downregulated	1	1.11047	0.3294					downregulated	1	0.772558	0.4618					upregulated	2	0.86401	0.4215	downregulated	1	1.3463	0.2602
collagen trimer	GO	1 out of 6	1.39819	downregulated	1	0.208668	0.8117	downregulated	1	0.884592	0.4129	downregulated	6	1.89831	0.1498	downregulated	3	2.8452	0.0581	upregulated	5	1.39819	0.247
regulation of bile acid metabolic process	GO	2 out of 6	1.37021									upregulated	1	4.19681	0.015	downregulated	1	1.99136	0.1365	upregulated	2	3.57566	0.028
oxidoreductase activity, acting on single donors with incorporation of molecular oxygen	GO	3 out of 6	1.36273	downregulated	1	3.8547	0.0212	upregulated	1	2.26145	0.1042	downregulated	2	2.21809	0.1088	downregulated	1	4.50037	0.0111	downregulated	1	2.32094	0.0982	downregulated	1	4.62803	0.0098
negative regulation of muscle tissue development	GO	2 out of 6	1.34367	upregulated	3	3.05679	0.047					downregulated	6	7.79238	0.0004	upregulated	1	2.31403	0.0989	upregulated	1	2.01571	0.1332	downregulated	3	3.0936	0.0453
regulation of cytokine production involved in inflammatory response	GO	2 out of 6	1.3125	downregulated	3	4.01114	0.0181	upregulated	2	3.15378	0.0427									upregulated	2	1.53951	0.2145	downregulated	1	1.08437	0.3381
mRNA cleavage factor complex	GO	1 out of 6	1.27568	upregulated	2	1.27409	0.2797	upregulated	1	0.684512	0.5043	downregulated	3	1.50301	0.2225	downregulated	1	1.13293	0.3221	upregulated	1	1.27568	0.2792
RNA polymerase II distal enhancer sequence-specific DNA binding	GO	4 out of 6	1.23149	upregulated	3	3.33643	0.0356	downregulated	1	2.54451	0.0785	upregulated	3	1.05211	0.3492	downregulated	4	1.44068	0.2368	upregulated	9	0.81463	0.4428	upregulated	5	0.820208	0.4403
profilin binding	GO	1 out of 6	1.22464									downregulated	1	0.752277	0.4713					upregulated	2	1.22464	0.2939
cleavage furrow	GO	3 out of 6	1.22151	upregulated	5	2.22752	0.1078	upregulated	5	2.57113	0.0764	downregulated	3	1.63355	0.1952	downregulated	3	2.03888	0.1302	upregulated	4	1.24497	0.2879	upregulated	3	2.7363	0.0648
positive regulation of cellular protein catabolic process	GO	3 out of 6	1.22009	upregulated	10	2.18725	0.1122	upregulated	8	2.71827	0.066	downregulated	13	4.55006	0.0106	downregulated	8	1.62061	0.1978	downregulated	6	1.3135	0.2689	upregulated	3	1.26844	0.2813
adhesion of symbiont to host cell	GO	1 out of 6	1.21224	downregulated	2	3.78603	0.0227													downregulated	1	2.57379	0.0762
inner ear receptor cell development	GO	3 out of 6	1.1943	upregulated	2	0.78078	0.458	downregulated	1	1.31092	0.2696	downregulated	4	1.37577	0.2526					upregulated	3	3.86437	0.021	downregulated	3	4.57597	0.0103
positive regulation of neural precursor cell proliferation	GO	3 out of 6	1.19067	upregulated	2	3.47942	0.0308	upregulated	2	3.13946	0.0433	downregulated	2	3.96502	0.019	upregulated	1	1.48037	0.2276	upregulated	6	2.99348	0.0501	upregulated	3	2.33142	0.0972
fatty acid binding	GO	1 out of 6	1.18384	upregulated	1	0.660789	0.5164	upregulated	3	2.90716	0.0546	downregulated	3	9.46492	7.8e-05	downregulated	2	4.48198	0.0113	upregulated	5	3.1318	0.0436	downregulated	2	1.94796	0.1426
growth cone	GO	3 out of 6	1.178	upregulated	12	3.4786	0.0309	upregulated	7	1.54277	0.2138	upregulated	3	1.90957	0.1481	downregulated	8	1.19104	0.3039	upregulated	11	2.66952	0.0693	upregulated	7	4.24839	0.0143
regulation of cerebellar granule cell precursor proliferation	GO	1 out of 6	1.16977																	upregulated	1	1.16977	0.3104
regulation of double-strand break repair	GO	3 out of 6	1.16395	upregulated	4	0.921399	0.398	upregulated	3	1.95667	0.1413	upregulated	3	1.39102	0.2488	downregulated	4	1.9779	0.1384	upregulated	3	1.58168	0.2056	upregulated	3	1.87344	0.1536
development of primary female sexual characteristics	GO	3 out of 6	1.13854	downregulated	3	2.36074	0.0944	upregulated	2	1.59347	0.2032	upregulated	4	2.7793	0.0621	downregulated	4	1.62113	0.1977	upregulated	6	2.66849	0.0694	downregulated	2	1.13905	0.3201
digestion	GO	2 out of 6	1.13495	downregulated	2	0.746899	0.4738	upregulated	3	2.95436	0.0521	upregulated	3	2.17601	0.1135	downregulated	5	3.70627	0.0246	downregulated	4	1.67831	0.1867	upregulated	5	2.55905	0.0774
interleukin-7-mediated signaling pathway	GO	1 out of 6	1.12835	upregulated	2	2.91178	0.0544					downregulated	2	1.12835	0.3236
retina vasculature morphogenesis in camera-type eye	GO	1 out of 6	1.10586	downregulated	1	2.93825	0.053					upregulated	1	1.83239	0.16
site of polarized growth	GO	3 out of 6	1.1055	upregulated	12	3.43269	0.0323	upregulated	7	1.52664	0.2173	upregulated	3	1.89275	0.1507	downregulated	8	1.1364	0.321	upregulated	11	2.63134	0.072	upregulated	7	4.18984	0.0151
chondrocyte proliferation	GO	2 out of 6	1.10235	downregulated	2	3.45025	0.0317	upregulated	1	3.45025	0.0317	upregulated	1	2.08503	0.1243									upregulated	1	3.18738	0.0413
regulation of type B pancreatic cell proliferation	GO	1 out of 6	1.09599																	upregulated	1	1.09599	0.3342
positive regulation of dendrite extension	GO	2 out of 6	1.09211					downregulated	1	2.95168	0.0523	upregulated	2	2.73822	0.0647	downregulated	2	2.13526	0.1182	downregulated	1	1.25662	0.2846
embryonic skeletal joint development	GO	1 out of 6	1.06366	downregulated	2	3.46264	0.0313					upregulated	1	2.39898	0.0908
regulation of cell-cell adhesion mediated by cadherin	GO	2 out of 6	1.06227	upregulated	1	3.11204	0.0445					downregulated	2	2.34742	0.0956					downregulated	1	1.30371	0.2715	upregulated	1	1.82689	0.1609
GATOR2 complex	GO	1 out of 6	1.05818													downregulated	1	1.05818	0.3471
negative regulation of oxidative stress-induced neuron death	GO	1 out of 6	1.0386									downregulated	2	2.13083	0.1187					downregulated	1	1.09223	0.3355
acid secretion	GO	3 out of 6	1.03807	upregulated	2	3.32844	0.0358	upregulated	1	0.119722	0.8872	upregulated	3	6.15366	0.0021	downregulated	1	1.96343	0.1404	upregulated	6	4.34935	0.0129	upregulated	5	4.32711	0.0132
regulation of neuroblast proliferation	GO	3 out of 6	1.03325	downregulated	2	3.48201	0.0307	upregulated	3	6.04625	0.0024	upregulated	1	1.11932	0.3265	upregulated	1	1.83164	0.1602	upregulated	3	3.67844	0.0253	upregulated	3	2.87001	0.0567
negative regulation of dendrite development	GO	4 out of 6	1.00287	downregulated	1	1.15534	0.315	upregulated	1	3.08419	0.0458	downregulated	1	1.07748	0.3405	downregulated	3	3.37311	0.0343	upregulated	1	0.232301	0.7927	downregulated	1	1.75117	0.1736
neuron projection extension	GO	3 out of 6	0.996801	upregulated	3	2.24281	0.1062	upregulated	3	3.1038	0.0449	downregulated	4	2.65705	0.0702	downregulated	3	2.57529	0.0761	downregulated	2	1.16145	0.313	upregulated	2	1.11107	0.3292
determination of bilateral symmetry	GO	4 out of 6	0.958534	upregulated	12	8.32668	0.0002	downregulated	2	2.07053	0.1261	downregulated	6	3.88499	0.0205	upregulated	2	1.34103	0.2616	upregulated	6	2.63564	0.0717	upregulated	3	2.03508	0.1307
cytokine biosynthetic process	GO	1 out of 6	0.955055									downregulated	1	0.955055	0.3848
sex determination	GO	2 out of 6	0.949861	upregulated	1	1.82788	0.1608					downregulated	1	1.44944	0.2347	downregulated	1	1.3283	0.2649
cysteine-type peptidase activity	GO	3 out of 6	0.941282	downregulated	3	0.874644	0.417	upregulated	16	6.31361	0.0018	downregulated	16	4.31779	0.0133	downregulated	13	5.69779	0.0034	downregulated	5	0.554704	0.5742	downregulated	3	3.08064	0.0459
nuclear envelope organization	GO	3 out of 6	0.931571					upregulated	3	1.62095	0.1977	downregulated	5	1.34418	0.2608	downregulated	1	0.222038	0.8009	downregulated	2	0.77125	0.4624	upregulated	2	1.75755	0.1725
vacuolar lumen	GO	1 out of 6	0.907445	upregulated	4	0.643432	0.5255	upregulated	8	2.71827	0.066	downregulated	23	12.5607	3.5e-06	downregulated	18	17.4534	2.6e-08	downregulated	10	5.03745	0.0065	upregulated	9	5.94489	0.0026
phosphate ion binding	GO	1 out of 6	0.889286									downregulated	1	0.889286	0.4109
positive regulation of non-canonical Wnt signaling pathway	GO	3 out of 6	0.887514	upregulated	1	2.22343	0.1082					downregulated	1	0.732131	0.4809					upregulated	1	0.743347	0.4755	upregulated	1	1.63546	0.1949
phagocytosis, recognition	GO	2 out of 6	0.883346	downregulated	2	2.68584	0.0682					downregulated	2	0.746432	0.4741	upregulated	1	1.53219	0.2161					downregulated	1	1.01674	0.3618
heme metabolic process	GO	3 out of 6	0.883053	upregulated	1	1.10419	0.3315	upregulated	2	1.98431	0.1375	downregulated	3	2.62736	0.0723	upregulated	1	2.05697	0.1278	upregulated	2	1.96478	0.1402	upregulated	2	1.43638	0.2378
RNA polymerase II complex binding	GO	3 out of 6	0.878408	upregulated	2	1.23772	0.29					downregulated	4	1.25117	0.2862	downregulated	2	1.2856	0.2765	upregulated	4	2.15114	0.1164	downregulated	2	2.57178	0.0764
regulation of protein K63-linked ubiquitination	GO	2 out of 6	0.877145									upregulated	1	3.33633	0.0356	downregulated	1	1.35907	0.2569	upregulated	2	2.8544	0.0576
acetylcholine receptor activity	GO	1 out of 6	0.87709																	upregulated	1	0.87709	0.416
acylglycerol metabolic process	GO	4 out of 6	0.855632	downregulated	2	5.00162	0.0067	upregulated	4	2.68322	0.0683	upregulated	7	6.85427	0.0011	downregulated	4	3.2913	0.0372	upregulated	3	1.06312	0.3454	upregulated	1	1.03708	0.3545
cysteine-type endopeptidase regulator activity involved in apoptotic process	GO	3 out of 6	0.839955	downregulated	2	1.46938	0.2301					upregulated	2	3.0197	0.0488	downregulated	4	3.44045	0.0321	downregulated	1	1.27682	0.2789	upregulated	1	0.22665	0.7972
regulation of blood circulation	GO	3 out of 6	0.824576	downregulated	4	3.86166	0.021	upregulated	8	3.58376	0.0278	downregulated	17	3.55541	0.0286	downregulated	11	2.84128	0.0584	downregulated	13	3.62642	0.0266	downregulated	5	2.22359	0.1082
U12-type spliceosomal complex	GO	1 out of 6	0.81653					upregulated	3	3.63204	0.0265	upregulated	1	1.7117	0.1806	downregulated	1	0.750303	0.4722	upregulated	1	0.81653	0.442
neutral lipid metabolic process	GO	4 out of 6	0.815843	downregulated	2	4.97486	0.0069	upregulated	4	2.64967	0.0707	upregulated	7	6.78609	0.0011	downregulated	4	3.25537	0.0386	upregulated	3	1.0102	0.3641	upregulated	1	1.01118	0.3638
divalent inorganic cation homeostasis	GO	3 out of 6	0.812454	upregulated	13	7.32632	0.0007	upregulated	12	5.96567	0.0026	downregulated	25	6.16494	0.0021	downregulated	12	1.49884	0.2234	upregulated	25	9.19836	0.0001	downregulated	11	2.75769	0.0634
peristalsis	GO	1 out of 6	0.776454									downregulated	2	4.35379	0.0129					downregulated	1	3.57734	0.0279
smooth muscle contraction	GO	3 out of 6	0.735103	upregulated	2	3.91866	0.0199	upregulated	2	2.37934	0.0926	downregulated	5	4.46977	0.0114	downregulated	1	3.56204	0.0284	downregulated	1	1.92886	0.1453	upregulated	1	0.930158	0.3945
regulation of long term synaptic depression	GO	1 out of 6	0.731963	upregulated	1	0.792063	0.4529	downregulated	1	1.52403	0.2178
dendrite development	GO	3 out of 6	0.721556	downregulated	6	4.04575	0.0175	downregulated	4	2.81122	0.0601	upregulated	8	3.62132	0.0267	upregulated	2	2.18307	0.1127	downregulated	3	2.78415	0.0618	upregulated	7	2.45312	0.086
regulation of synaptic vesicle endocytosis	GO	1 out of 6	0.718452	upregulated	1	1.01977	0.3607													upregulated	1	1.73822	0.1758
positive regulation of acrosome reaction	GO	1 out of 6	0.71696													upregulated	1	2.694	0.0676					upregulated	1	3.41096	0.033
regulation of autophagosome assembly	GO	3 out of 6	0.695713	upregulated	3	3.21536	0.0401	upregulated	3	3.07498	0.0462	downregulated	3	2.45923	0.0855	downregulated	4	4.614	0.0099	downregulated	2	2.9929	0.0501	upregulated	2	2.90573	0.0547
body morphogenesis	GO	2 out of 6	0.688412	upregulated	2	0.338361	0.7129					upregulated	1	0.308479	0.7346	downregulated	2	0.510052	0.6005	upregulated	2	0.8252	0.4381
positive regulation of receptor binding	GO	2 out of 6	0.684232	downregulated	1	2.66811	0.0694					downregulated	1	1.4456	0.2356	upregulated	1	3.42947	0.0324
basal RNA polymerase II transcription machinery binding	GO	3 out of 6	0.672531	upregulated	2	0.783675	0.4567	upregulated	1	0.260314	0.7708	downregulated	5	1.04869	0.3504	downregulated	2	0.823242	0.439	upregulated	5	1.5491	0.2124	downregulated	2	1.70451	0.1819
regulation of production of miRNAs involved in gene silencing by miRNA	GO	2 out of 6	0.654383									downregulated	2	0.647742	0.5232	downregulated	1	0.689453	0.5019	downregulated	1	0.682812	0.5052
positive regulation of response to drug	GO	3 out of 6	0.647922	upregulated	1	3.59456	0.0275					downregulated	3	2.56182	0.0772	downregulated	2	2.34141	0.0962	downregulated	1	1.44048	0.2368	upregulated	1	0.77973	0.4585
post-embryonic animal morphogenesis	GO	1 out of 6	0.639619													downregulated	1	0.639619	0.5275
neuromuscular junction	GO	3 out of 6	0.632224	upregulated	2	3.95803	0.0191	upregulated	2	1.28104	0.2777	downregulated	4	3.05824	0.047	downregulated	3	2.77146	0.0626	upregulated	7	4.13744	0.016	downregulated	2	4.09584	0.0166
cell-cell recognition	GO	4 out of 6	0.623394	downregulated	3	2.00187	0.1351	upregulated	1	1.76453	0.1713	downregulated	3	2.64535	0.071	downregulated	1	2.72111	0.0658	downregulated	6	6.27725	0.0019	upregulated	1	1.29684	0.2734
MLL3/4 complex	GO	2 out of 6	0.617093	upregulated	1	0.960393	0.3827					downregulated	1	0.470395	0.6248					upregulated	1	1.10709	0.3305
negative regulation of reactive oxygen species biosynthetic process	GO	3 out of 6	0.613317	downregulated	2	2.40966	0.0898	upregulated	2	2.96104	0.0518	downregulated	2	1.27522	0.2794	downregulated	1	0.55688	0.573	downregulated	1	0.6674	0.513
proteasome core complex, beta-subunit complex	GO	2 out of 6	0.610711									downregulated	2	2.31471	0.0988	downregulated	1	1.83497	0.1596	downregulated	2	3.53897	0.029
regulation of striated muscle tissue development	GO	4 out of 6	0.607178	upregulated	11	6.91343	0.001	downregulated	2	0.628457	0.5334	downregulated	12	8.59801	0.0002	downregulated	5	1.67504	0.1873	upregulated	4	1.56667	0.2087	downregulated	6	4.94757	0.0071
purine-containing compound transmembrane transport	GO	3 out of 6	0.596594	downregulated	1	1.50241	0.2226					downregulated	1	1.17981	0.3073	downregulated	1	1.52519	0.2176	downregulated	1	3.61082	0.027
negative regulation of establishment of protein localization	GO	4 out of 6	0.592386	upregulated	8	2.39406	0.0913	upregulated	4	3.12271	0.044	downregulated	3	0.523886	0.5922	downregulated	4	0.773452	0.4614	upregulated	10	2.91924	0.054	upregulated	9	1.89257	0.1507
craniofacial suture morphogenesis	GO	3 out of 6	0.571088									downregulated	1	0.805564	0.4468	downregulated	1	0.819797	0.4405	upregulated	2	1.01307	0.3631	downregulated	1	2.06734	0.1265
positive regulation of cellular senescence	GO	2 out of 6	0.561189	upregulated	1	1.89575	0.1502					downregulated	1	0.702052	0.4956					upregulated	1	1.75489	0.1729
regulation of transforming growth factor beta receptor signaling pathway	GO	3 out of 6	0.553674	upregulated	5	2.23004	0.1075	downregulated	2	4.12832	0.0161	upregulated	7	4.94126	0.0071	downregulated	6	3.37947	0.0341	upregulated	7	3.31105	0.0365	upregulated	4	1.03445	0.3554
regulation of vasoconstriction	GO	2 out of 6	0.532167	downregulated	1	3.55729	0.0285	upregulated	3	2.12287	0.1197	upregulated	4	3.78684	0.0227	downregulated	6	6.26056	0.0019	downregulated	2	3.40228	0.0333	downregulated	1	3.76053	0.0233
mRNA cleavage involved in mRNA processing	GO	1 out of 6	0.519875					upregulated	1	1.2631	0.2828	upregulated	1	1.68158	0.1861	downregulated	1	1.78298	0.1681
histone demethylase activity	GO	4 out of 6	0.491655	downregulated	1	1.50377	0.2223	downregulated	1	1.33892	0.2621	upregulated	1	1.39201	0.2486	upregulated	2	4.69138	0.0092	upregulated	5	2.5303	0.0796	upregulated	2	1.20206	0.3006
positive regulation of TORC1 signaling	GO	3 out of 6	0.483226	downregulated	1	2.02457	0.1321	upregulated	1	2.81129	0.0601					downregulated	2	3.22903	0.0396	upregulated	1	1.36188	0.2562	downregulated	1	3.32096	0.0361
lactation	GO	3 out of 6	0.478119	downregulated	1	2.99215	0.0502	upregulated	1	2.28547	0.1017	downregulated	3	0.510159	0.6004					downregulated	2	2.3305	0.0972	upregulated	1	1.59178	0.2036
regulation of extrinsic apoptotic signaling pathway in absence of ligand	GO	4 out of 6	0.461989	upregulated	2	1.38285	0.2509	upregulated	2	4.99041	0.0068	downregulated	3	1.66986	0.1883	downregulated	3	1.33777	0.2624	upregulated	3	0.471817	0.6239	upregulated	5	3.3558	0.0349
regulation of telomere capping	GO	3 out of 6	0.457559	upregulated	2	2.48933	0.083	upregulated	1	1.19592	0.3024	downregulated	2	2.38334	0.0922	downregulated	1	2.02163	0.1324	downregulated	1	0.888126	0.4114	upregulated	1	0.625974	0.5347
GTP-dependent protein binding	GO	2 out of 6	0.435317	upregulated	1	3.98333	0.0186	downregulated	1	4.526	0.0108	downregulated	2	0.99144	0.371					downregulated	1	1.09879	0.3333
response to cold	GO	3 out of 6	0.411419	upregulated	1	2.45325	0.086					downregulated	3	1.21763	0.2959					upregulated	1	0.71699	0.4882	upregulated	1	0.930051	0.3945
peptide transmembrane transporter activity	GO	1 out of 6	0.388498	upregulated	1	0.272256	0.7617					downregulated	2	6.04108	0.0024					downregulated	3	3.80365	0.0223	downregulated	1	1.57667	0.2067
beta-catenin-TCF complex assembly	GO	3 out of 6	0.375198	downregulated	2	1.61251	0.1994	upregulated	1	0.445951	0.6402	upregulated	2	1.72885	0.1775	upregulated	1	2.08721	0.124	upregulated	4	1.41661	0.2425	upregulated	2	1.60808	0.2003
modulation by virus of host morphology or physiology	GO	4 out of 6	0.374885	downregulated	3	4.27435	0.0139	upregulated	2	5.15002	0.0058	downregulated	1	0.908462	0.4031	downregulated	1	0.660561	0.5166	downregulated	2	2.11454	0.1207	upregulated	3	1.79608	0.1659
protein binding, bridging	GO	3 out of 6	0.345241	downregulated	6	1.20744	0.299	upregulated	8	4.57618	0.0103	downregulated	11	2.35022	0.0953	upregulated	2	1.30043	0.2724	upregulated	15	2.66419	0.0697	upregulated	8	2.11787	0.1203
positive regulation of establishment of protein localization	GO	3 out of 6	0.330891	downregulated	10	1.00431	0.3663	upregulated	14	2.50234	0.0819	downregulated	28	2.29882	0.1004	downregulated	19	5.76786	0.0031	downregulated	23	6.06191	0.0023	downregulated	11	2.67819	0.0687
ion channel activity	GO	1 out of 6	0.321962	upregulated	22	12.0413	5.9e-06	downregulated	6	1.27349	0.2799	downregulated	24	8.44112	0.0002	upregulated	4	2.98916	0.0503	downregulated	7	2.13335	0.1184	upregulated	4	2.45531	0.0858
positive regulation of cell cycle	GO	3 out of 6	0.31825	upregulated	14	0.737738	0.4782	upregulated	17	4.33596	0.0131	downregulated	32	4.36522	0.0127	downregulated	18	1.46134	0.2319	upregulated	30	1.07658	0.3408	downregulated	9	1.51119	0.2206
intestinal absorption	GO	2 out of 6	0.316026					upregulated	1	0.644161	0.5251	downregulated	2	0.442774	0.6423	downregulated	3	4.23429	0.0145	downregulated	2	2.258	0.1046	downregulated	1	1.45888	0.2325
positive regulation of protein localization to cell surface	GO	2 out of 6	0.312132	downregulated	1	1.84209	0.1585													downregulated	1	2.2777	0.1025	upregulated	1	0.747743	0.4734
steroid hydroxylase activity	GO	2 out of 6	0.286545									downregulated	1	0.772558	0.4618					upregulated	2	0.891018	0.4102	downregulated	1	1.37703	0.2523
positive regulation of endothelial cell apoptotic process	GO	4 out of 6	0.269497	upregulated	1	3.2697	0.038	downregulated	1	2.10318	0.1221	downregulated	1	1.62976	0.196	downregulated	1	0.696809	0.4982	upregulated	2	1.54083	0.2142	downregulated	1	2.43138	0.0879
protein alpha-1,2-demannosylation	GO	2 out of 6	0.257721	upregulated	1	0.410446	0.6634	upregulated	2	1.52494	0.2176	downregulated	1	0.199337	0.8193	downregulated	2	1.99377	0.1362
endoplasmic reticulum mannose trimming	GO	2 out of 6	0.246197	upregulated	1	0.55854	0.572	upregulated	2	1.90724	0.1485	downregulated	1	0.30586	0.7365	downregulated	2	2.40612	0.0902
response to xenobiotic stimulus	GO	2 out of 6	0.206505	downregulated	5	3.77494	0.0229	upregulated	9	3.24854	0.0388	upregulated	7	1.86658	0.1547	downregulated	7	1.66861	0.1885	downregulated	9	2.02073	0.1326	downregulated	5	1.34973	0.2593
heterotrimeric G-protein complex	GO	1 out of 6	0.198069	upregulated	3	5.00813	0.0067	downregulated	1	1.11978	0.3264	upregulated	2	1.238	0.29	downregulated	1	0.339369	0.7122	upregulated	1	0.198069	0.8203
lamellipodium organization	GO	3 out of 6	0.18869	upregulated	2	2.59445	0.0747	upregulated	4	5.88241	0.0028	upregulated	2	4.03232	0.0177	downregulated	4	4.15292	0.0157	upregulated	9	5.61555	0.0036	upregulated	4	2.9294	0.0534
regulation of apoptotic signaling pathway	GO	3 out of 6	0.185244	downregulated	7	0.545847	0.5794	upregulated	17	7.83651	0.0004	downregulated	27	4.00227	0.0183	downregulated	23	6.38055	0.0017	upregulated	25	2.05154	0.1285	downregulated	10	2.90691	0.0546
regulation of RIG-I signaling pathway	GO	3 out of 6	0.184112					upregulated	1	3.17221	0.0419	downregulated	3	3.57893	0.0279	downregulated	1	1.18376	0.3061	downregulated	1	2.60915	0.0736	upregulated	1	1.20279	0.3004
carbohydrate catabolic process	GO	4 out of 6	0.182763	downregulated	2	0.728861	0.4825	downregulated	1	0.932333	0.3936	downregulated	7	1.08514	0.3379	downregulated	7	4.40855	0.0122	downregulated	4	5.23911	0.0053	downregulated	3	1.73302	0.1768
snoRNA binding	GO	1 out of 6	0.176727	upregulated	1	0.390694	0.6766	downregulated	2	2.0679	0.1265									downregulated	2	1.50048	0.223
rRNA binding	GO	3 out of 6	0.166439	upregulated	2	0.220124	0.8024	upregulated	2	0.972176	0.3783	downregulated	4	1.07741	0.3405	downregulated	3	1.14261	0.319	downregulated	3	1.44213	0.2364	upregulated	2	0.580848	0.5594
vesicle fusion	GO	3 out of 6	0.163666	upregulated	4	2.01208	0.1337	upregulated	5	3.79837	0.0224	downregulated	4	0.409796	0.6638	downregulated	4	1.69921	0.1828	upregulated	6	1.54592	0.2131	upregulated	5	3.86511	0.021
ruffle assembly	GO	4 out of 6	0.150964	upregulated	1	1.95865	0.141	upregulated	1	1.57393	0.2072	downregulated	1	0.543173	0.5809	downregulated	1	1.37977	0.2516	upregulated	1	0.553343	0.575	upregulated	1	1.20725	0.299
dendritic spine organization	GO	4 out of 6	0.14547	downregulated	1	0.771086	0.4625	downregulated	1	3.99667	0.0184	downregulated	4	2.8706	0.0567	upregulated	1	2.65985	0.07	downregulated	3	5.88232	0.0028	upregulated	2	1.04929	0.3502
interleukin-15-mediated signaling pathway	GO	2 out of 6	0.130953	downregulated	1	1.36403	0.2556					downregulated	1	0.833342	0.4346	upregulated	1	2.06642	0.1266
ESCRT complex disassembly	GO	1 out of 6	0.112152					upregulated	1	1.40026	0.2465					downregulated	1	1.51241	0.2204
ESCRT III complex disassembly	GO	1 out of 6	0.112152					upregulated	1	1.40026	0.2465					downregulated	1	1.51241	0.2204
extracellular negative regulation of signal transduction	GO	1 out of 6	0.0922255	downregulated	2	2.64439	0.071					upregulated	1	1.65899	0.1903					downregulated	1	0.893181	0.4094
signal transduction involved in G2 DNA damage checkpoint	GO	2 out of 6	0.0873984	upregulated	1	0.532666	0.587	upregulated	2	2.0932	0.1233	upregulated	1	2.207	0.11	downregulated	2	3.47854	0.0309	upregulated	2	1.44171	0.2365
regulation of reactive oxygen species biosynthetic process	GO	3 out of 6	0.0738944	downregulated	3	2.02342	0.1322	upregulated	4	8.62061	0.0002	downregulated	8	7.71852	0.0004	downregulated	7	6.61569	0.0013	downregulated	5	4.31442	0.0134	downregulated	3	3.3487	0.0351
negative regulation of TORC1 signaling	GO	3 out of 6	0.0727525	upregulated	2	4.08622	0.0168	upregulated	1	1.89863	0.1498	downregulated	1	1.86731	0.1545	downregulated	2	3.17134	0.0419	upregulated	1	1.01896	0.361
oxidoreductase activity, acting on the CH-CH group of donors	GO	3 out of 6	0.0630517	upregulated	3	2.40377	0.0904	upregulated	4	8.20249	0.0003	upregulated	3	2.14042	0.1176	downregulated	4	5.45383	0.0043	upregulated	7	5.85834	0.0029	upregulated	3	1.49756	0.2237
negative regulation of cardiocyte differentiation	GO	3 out of 6	0.0621802	upregulated	1	1.54306	0.2137					downregulated	1	1.36225	0.2561	downregulated	1	0.712673	0.4903	downregulated	2	2.39865	0.0908	upregulated	1	1.92897	0.1453
MCM complex	GO	4 out of 6	0.0589698					upregulated	5	13.1559	1.9e-06	downregulated	2	3.36622	0.0345	downregulated	3	5.77336	0.0031	upregulated	1	1.05594	0.3479	upregulated	1	3.01935	0.0488
negative regulation of reactive oxygen species metabolic process	GO	2 out of 6	0.0582351	downregulated	4	3.16875	0.0421	upregulated	2	2.17862	0.1132	downregulated	5	1.04869	0.3504	upregulated	1	1.74347	0.1749	downregulated	1	0.237114	0.7889
cysteine-type endopeptidase activator activity involved in apoptotic process	GO	3 out of 6	0.0562289	downregulated	2	2.81129	0.0601					upregulated	2	3.83158	0.0217	downregulated	2	2.40612	0.0902	downregulated	1	2.0259	0.1319	upregulated	1	0.696299	0.4984
mitotic spindle	GO	4 out of 6	0.039594	upregulated	10	4.51682	0.0109	downregulated	2	2.96936	0.0513	downregulated	11	2.8124	0.0601	downregulated	6	1.51375	0.2201	upregulated	7	1.09445	0.3347	downregulated	5	3.83354	0.0216
positive regulation of fatty acid transport	GO	2 out of 6	0.0392912									downregulated	1	3.11999	0.0442	downregulated	1	2.4485	0.0864	downregulated	2	3.28837	0.0373	downregulated	1	2.24082	0.1064
telomerase holoenzyme complex	GO	1 out of 6	0.0215147	upregulated	2	1.95552	0.1415	upregulated	2	2.01679	0.1331	downregulated	2	1.03908	0.3538	downregulated	1	1.92653	0.1457	upregulated	3	1.37776	0.2521	downregulated	1	1.35624	0.2576
trans-Golgi network	GO	1 out of 6	0.00843095	upregulated	9	4.59267	0.0101	upregulated	8	1.51281	0.2203	downregulated	29	18.5294	9e-09	downregulated	19	15.1259	2.7e-07	downregulated	10	3.60769	0.0271	upregulated	9	3.61612	0.0269
negative regulation of stem cell differentiation	GO	3 out of 6	0.0055571	downregulated	2	1.78791	0.1673	upregulated	2	3.02115	0.0487	downregulated	2	0.633727	0.5306					upregulated	1	0.605068	0.546	downregulated	1	1.3112	0.2695
regulation of intrinsic apoptotic signaling pathway	GO	2 out of 6	0.00485949	upregulated	10	1.09282	0.3353	upregulated	5	3.0187	0.0489	downregulated	12	5.94629	0.0026	downregulated	9	5.11221	0.006	downregulated	8	3.86913	0.0209	downregulated	4	3.07299	0.0463
