# Supplementary material for: Physical Activity Rewires the Human Brain against Neurodegeneration
Source: Int J Mol Sci. 2022 Jun 2;23(11):6223. doi: 10.3390/ijms23116223 (PMC9181322; doi:10.3390/ijms23116223)
Supplement: Supplementary file 1 [file ijms-23-06223-s001.zip › Table S12.xlsx]

## Sheet: Sheet1
Table S12. Functional analysis of genes upregulated in physically active subjects and downregulated in Parkinson's disease datasets
Bioset 1: Hippocampi from 76-99yr old female subjects with high physical activity levels _vs_ low (Study: Hippocampi from post-mortem brains of subjects with low, moderate, or high physical activity levels)
Bioset 2: Hippocampi from 76-99yr old female subjects with moderate physical activity levels _vs_ low (Study: Hippocampi from post-mortem brains of subjects with low, moderate, or high physical activity levels)
Bioset 3: Hippocampi from 78-101yr old male subjects with high physical activity levels _vs_ low (Study: Hippocampi from post-mortem brains of subjects with low, moderate, or high physical activity levels)
Bioset 4: Hippocampi from 78-101yr old male subjects with moderate physical activity levels _vs_ low (Study: Hippocampi from post-mortem brains of subjects with low, moderate, or high physical activity levels)
Bioset 5: Substantia nigrae from postmortem brain - Parkinson's disease patients _vs_ normal (Study: Substantia nigrae from brains of Parkinson's disease patients)
Bioset 6: Lateral substantia nigra from Parkinson's disease patients _vs_ normal donors (Study: Substantia nigra and frontal gyrus brain regions in Parkinson's disease patients)
Bioset 7: Medial substantia nigra from Parkinson's disease patients _vs_ normal donors (Study: Substantia nigra and frontal gyrus brain regions in Parkinson's disease patients)
Biogroup	Source	Specificity	Overall Biogroup score	Correlated direction - Bioset 1	Common genes - Bioset 1	Score - Bioset 1	p-value - Bioset 1	Correlated direction - Bioset 2	Common genes - Bioset 2	Score - Bioset 2	p-value - Bioset 2	Correlated direction - Bioset 3	Common genes - Bioset 3	Score - Bioset 3	p-value - Bioset 3	Correlated direction - Bioset 4	Common genes - Bioset 4	Score - Bioset 4	p-value - Bioset 4	Correlated direction - Bioset 5	Common genes - Bioset 5	Score - Bioset 5	p-value - Bioset 5	Correlated direction - Bioset 6	Common genes - Bioset 6	Score - Bioset 6	p-value - Bioset 6	Correlated direction - Bioset 7	Common genes - Bioset 7	Score - Bioset 7	p-value - Bioset 7
synaptic signaling	GO	6 out of 7	270.806	upregulated	43	41.3164	1.1e-18	downregulated	4	1.08021	0.3395	upregulated	22	10.8215	2e-05	upregulated	4	4.28855	0.0137	downregulated	49	34.1884	1.4e-15	downregulated	117	94.4829	9.3e-42	downregulated	108	86.7885	2e-38
presynapse	GO	6 out of 7	212.417	upregulated	30	17.415	2.7e-08	upregulated	5	1.03527	0.3551	downregulated	17	3.05633	0.0471	upregulated	2	3.11245	0.0445	downregulated	42	26.1939	4.2e-12	downregulated	114	84.0569	3.1e-37	downregulated	102	83.6601	4.6e-37
postsynapse	GO	6 out of 7	209.048	upregulated	39	19.9728	2.1e-09	downregulated	11	1.62425	0.1971	upregulated	34	15.0247	3e-07	upregulated	12	8.49143	0.0002	downregulated	48	22.3929	1.9e-10	downregulated	123	74.9601	2.8e-33	downregulated	109	69.83	4.7e-31
synaptic membrane	GO	6 out of 7	141.061	upregulated	28	15.4912	1.9e-07	downregulated	5	0.373244	0.6885	upregulated	25	14.7116	4.1e-07	upregulated	9	9.55228	7.1e-05	downregulated	30	14.9613	3.2e-07	downregulated	79	45.0638	2.7e-20	downregulated	71	41.6536	8.1e-19
synaptic vesicle cycle	GO	6 out of 7	136.766	upregulated	5	3.45979	0.0314	upregulated	1	0.133963	0.8746	upregulated	5	2.58466	0.0754	downregulated	4	1.33927	0.262	downregulated	19	19.7538	2.6e-09	downregulated	44	57.6156	9.5e-26	downregulated	39	54.5574	2e-24
vesicle localization	GO	6 out of 7	134.458	upregulated	13	5.88301	0.0028	upregulated	5	0.165569	0.8474	upregulated	11	3.07183	0.0463	downregulated	10	2.7466	0.0641	downregulated	35	19.0747	5.2e-09	downregulated	75	54.6611	1.8e-24	downregulated	67	54.3485	2.5e-24
establishment of vesicle localization	GO	6 out of 7	133.57	upregulated	13	6.10264	0.0022	upregulated	5	0.183208	0.8326	upregulated	11	3.22872	0.0396	downregulated	10	2.87842	0.0562	downregulated	34	18.7306	7.3e-09	downregulated	73	54.804	1.6e-24	downregulated	65	53.3991	6.4e-24
regulation of membrane potential	GO	6 out of 7	130.186	upregulated	25	18.3535	1.1e-08	downregulated	8	2.94568	0.0526	upregulated	23	7.99584	0.0003	upregulated	6	4.20939	0.0149	downregulated	43	19.4939	3.4e-09	downregulated	76	43.9692	8e-20	downregulated	72	39.1097	1e-17
cell part morphogenesis	GO	4 out of 7	125.901	upregulated	28	6.52748	0.0015	downregulated	9	1.47746	0.2282	downregulated	40	10.0132	4.5e-05	downregulated	26	3.91881	0.0199	downregulated	45	25.5197	8.3e-12	downregulated	110	59.7297	1.1e-26	downregulated	95	49.5339	3.1e-22
establishment of organelle localization	GO	4 out of 7	125.587	upregulated	22	4.98726	0.0068	downregulated	5	1.75632	0.1727	downregulated	31	8.58247	0.0002	downregulated	20	4.91294	0.0074	downregulated	50	17.7834	1.9e-08	downregulated	105	60.2619	6.7e-27	downregulated	96	57.806	7.9e-26
cell morphogenesis involved in neuron differentiation	GO	4 out of 7	122.407	upregulated	26	9.45995	7.8e-05	downregulated	8	1.6274	0.1964	downregulated	34	8.71008	0.0002	downregulated	21	3.32616	0.0359	downregulated	37	23.9826	3.8e-11	downregulated	95	55.5344	7.6e-25	downregulated	83	47.0942	3.5e-21
postsynaptic density	GO	6 out of 7	120.371	upregulated	21	13.8338	9.8e-07	downregulated	6	1.18682	0.3052	upregulated	24	16.8327	4.9e-08	upregulated	7	4.19419	0.0151	downregulated	18	4.36102	0.0128	downregulated	69	43.0207	2.1e-19	downregulated	58	39.3156	8.4e-18
postsynaptic specialization	GO	6 out of 7	119.905	upregulated	21	13.726	1.1e-06	downregulated	6	1.17088	0.3101	upregulated	24	16.7112	5.5e-08	upregulated	7	4.16369	0.0156	downregulated	19	5.03539	0.0065	downregulated	69	42.5766	3.2e-19	downregulated	58	38.8634	1.3e-17
asymmetric synapse	GO	6 out of 7	119.5	upregulated	21	13.4083	1.5e-06	downregulated	6	1.1243	0.3249	upregulated	24	16.3527	7.9e-08	upregulated	7	4.07378	0.017	downregulated	18	4.16546	0.0155	downregulated	70	42.9192	2.3e-19	downregulated	59	39.705	5.7e-18
distal axon	GO	6 out of 7	117.239	upregulated	19	11.4914	1e-05	upregulated	8	1.17386	0.3092	upregulated	5	2.78639	0.0616	downregulated	11	1.92863	0.1453	downregulated	34	25.4704	8.7e-12	downregulated	71	39.3531	8.1e-18	downregulated	59	38.8928	1.3e-17
neuronal cell body	GO	4 out of 7	115.603	upregulated	25	5.95831	0.0026	downregulated	9	3.1561	0.0426	downregulated	39	7.41319	0.0006	downregulated	17	3.85131	0.0213	downregulated	53	21.9845	2.8e-10	downregulated	102	55.9231	5.2e-25	downregulated	95	46.1572	9e-21
postsynaptic membrane	GO	6 out of 7	112.065	upregulated	23	13.0835	2.1e-06	downregulated	5	0.78012	0.4584	upregulated	22	15.8199	1.3e-07	upregulated	8	8.6607	0.0002	downregulated	25	12.3524	4.3e-06	downregulated	58	32.5513	7.3e-15	downregulated	55	30.3773	6.4e-14
regulation of synapse structure or activity	GO	6 out of 7	110.154	upregulated	18	11.0633	1.6e-05	downregulated	5	2.47436	0.0842	upregulated	8	4.72274	0.0089	upregulated	6	7.19365	0.0008	downregulated	16	14.3902	5.6e-07	downregulated	47	38.2557	2.4e-17	downregulated	47	37.0025	8.5e-17
regulation of synapse organization	GO	6 out of 7	108.394	upregulated	18	11.5014	1e-05	downregulated	4	2.50352	0.0818	upregulated	8	4.89487	0.0075	upregulated	6	7.35095	0.0006	downregulated	16	14.8131	3.7e-07	downregulated	45	37.0991	7.7e-17	downregulated	45	35.2384	5e-16
synaptic vesicle localization	GO	4 out of 7	107.082	upregulated	6	3.60336	0.0272	downregulated	1	0.362698	0.6958	downregulated	5	3.17071	0.042	downregulated	5	2.21822	0.1088	downregulated	13	13.6043	1.2e-06	downregulated	37	49.9656	2e-22	downregulated	33	45.6605	1.5e-20
synaptic vesicle transport	GO	4 out of 7	104.153	upregulated	6	3.62746	0.0266	downregulated	1	0.370782	0.6902	downregulated	5	3.22584	0.0397	downregulated	5	2.26635	0.1037	downregulated	13	13.8529	9.6e-07	downregulated	36	48.4227	9.3e-22	downregulated	32	44.1128	7e-20
axon development	GO	5 out of 7	103.461	upregulated	23	7.89887	0.0004	upregulated	5	1.31544	0.2684	downregulated	31	8.55717	0.0002	downregulated	23	5.80267	0.003	downregulated	33	21.7104	3.7e-10	downregulated	89	47.4134	2.6e-21	downregulated	74	39.4832	7.1e-18
guanyl nucleotide binding	GO	6 out of 7	100.857	upregulated	22	6.45466	0.0016	upregulated	17	2.27886	0.1024	upregulated	18	5.20735	0.0055	upregulated	3	1.8241	0.1614	downregulated	52	23.9561	3.9e-11	downregulated	74	30.9246	3.7e-14	downregulated	67	32.0352	1.2e-14
exocytic vesicle membrane	GO	6 out of 7	100.393	upregulated	12	14.8156	3.7e-07	downregulated	1	0.163223	0.8494	upregulated	3	0.860862	0.4228	upregulated	1	2.50977	0.0813	downregulated	14	12.4854	3.8e-06	downregulated	35	39.119	1e-17	downregulated	30	30.7657	4.4e-14
regulation of synapse assembly	GO	7 out of 7	93.0539	upregulated	14	16.1358	9.8e-08	upregulated	2	1.1051	0.3312	upregulated	6	6.43178	0.0016	upregulated	3	4.27625	0.0139	downregulated	10	15.0348	3e-07	downregulated	24	24.7207	1.8e-11	downregulated	26	25.3495	9.8e-12
synaptic vesicle exocytosis	GO	6 out of 7	92.0888	upregulated	3	4.01069	0.0181	upregulated	1	0.380528	0.6835	upregulated	4	3.29875	0.0369	downregulated	2	1.66505	0.1892	downregulated	11	13.3737	1.6e-06	downregulated	26	38.7312	1.5e-17	downregulated	23	33.959	1.8e-15
chemical synaptic transmission	GO	4 out of 7	87.9758	upregulated	42	38.9629	1.2e-17	downregulated	4	1.13052	0.3229	upregulated	21	11.0061	1.7e-05	upregulated	4	4.4174	0.0121	downregulated	48	34.7199	8.3e-16	downregulated	115	92.2567	8.6e-41	downregulated	105	86.2573	3.5e-38
transmembrane transporter complex	GO	6 out of 7	86.2344	upregulated	24	21.1646	6.4e-10	downregulated	7	1.49227	0.2249	upregulated	11	4.43845	0.0118	upregulated	1	2.22299	0.1083	downregulated	28	12.4814	3.8e-06	downregulated	59	25.7041	6.9e-12	downregulated	51	21.7151	3.7e-10
protein localization to cell periphery	GO	5 out of 7	84.4468	upregulated	17	9.31521	9e-05	upregulated	7	4.19533	0.0151	downregulated	20	5.86612	0.0028	downregulated	8	2.74992	0.0639	downregulated	18	14.0237	8.1e-07	downregulated	44	31.6041	1.9e-14	downregulated	47	33.9246	1.8e-15
learning or memory	GO	7 out of 7	83.2595	upregulated	12	6.58619	0.0014	upregulated	7	1.44714	0.2352	upregulated	10	2.49184	0.0828	upregulated	4	3.84481	0.0214	downregulated	19	8.78123	0.0002	downregulated	52	34.9403	6.7e-16	downregulated	48	25.168	1.2e-11
protein localization to plasma membrane	GO	5 out of 7	79.9676	upregulated	14	8.12717	0.0003	upregulated	5	2.61294	0.0733	downregulated	16	4.8634	0.0077	downregulated	6	2.895	0.0553	downregulated	17	13.8966	9.2e-07	downregulated	38	30.4811	5.8e-14	downregulated	40	32.6082	6.9e-15
learning	GO	5 out of 7	77.5209	upregulated	5	2.58694	0.0752	downregulated	2	0.834409	0.4341	upregulated	7	3.00304	0.0496	downregulated	6	2.68379	0.0683	downregulated	14	11.7333	8e-06	downregulated	39	41.0349	1.5e-18	downregulated	33	22.681	1.4e-10
coenzyme binding	GO	7 out of 7	74.2675	upregulated	10	0.492943	0.6108	upregulated	20	10.2981	3.4e-05	upregulated	12	5.27765	0.0051	upregulated	7	9.42874	8e-05	downregulated	43	25.4926	8.5e-12	downregulated	44	11.2866	1.3e-05	downregulated	41	11.9909	6.2e-06
synapse organization	GO	4 out of 7	73.6232	upregulated	13	9.77263	5.7e-05	downregulated	5	2.384	0.0922	downregulated	17	8.35276	0.0002	downregulated	8	2.84278	0.0583	downregulated	17	9.30065	9.1e-05	downregulated	49	34.4038	1.1e-15	downregulated	48	33.7256	2.3e-15
regulation of exocytosis	GO	5 out of 7	73.5413	upregulated	9	4.13856	0.0159	upregulated	6	1.06259	0.3456	downregulated	15	7.55007	0.0005	downregulated	12	11.0847	1.5e-05	downregulated	20	10.3638	3.2e-05	downregulated	47	42.4064	3.8e-19	downregulated	44	34.2046	1.4e-15
dopamine metabolic process	GO	5 out of 7	70.3634	upregulated	2	1.05859	0.3469	upregulated	1	2.67716	0.0688	downregulated	2	3.50457	0.0301	downregulated	2	2.6931	0.0677	downregulated	8	20.83	9e-10	downregulated	8	26.8128	2.3e-12	downregulated	9	25.1825	1.2e-11
membrane docking	GO	5 out of 7	68.6609	upregulated	16	8.01399	0.0003	upregulated	12	7.36402	0.0006	downregulated	15	1.85476	0.1565	downregulated	7	1.27827	0.2785	downregulated	27	15.3995	2.1e-07	downregulated	43	22.3066	2.1e-10	downregulated	37	18.7098	7.5e-09
positive regulation of neurogenesis	GO	6 out of 7	66.3015	upregulated	22	5.33136	0.0048	upregulated	16	4.53082	0.0108	downregulated	40	13.1125	2e-06	upregulated	7	3.61085	0.027	downregulated	33	7.7022	0.0005	downregulated	92	31.832	1.5e-14	downregulated	73	26.4067	3.4e-12
adult behavior	GO	5 out of 7	66.2824	upregulated	11	6.09967	0.0022	downregulated	1	0.483806	0.6164	upregulated	9	6.70864	0.0012	downregulated	7	4.62831	0.0098	downregulated	16	13.3742	1.6e-06	downregulated	31	24.5379	2.2e-11	downregulated	27	20.6741	1.1e-09
growth cone	GO	6 out of 7	65.7095	upregulated	12	3.4786	0.0309	upregulated	7	1.54277	0.2138	upregulated	3	1.90957	0.1481	downregulated	8	1.19104	0.3039	downregulated	22	10.4209	3e-05	downregulated	42	25.0589	1.3e-11	downregulated	38	24.4898	2.3e-11
site of polarized growth	GO	6 out of 7	65.5802	upregulated	12	3.43269	0.0323	upregulated	7	1.52664	0.2173	upregulated	3	1.89275	0.1507	downregulated	8	1.1364	0.321	downregulated	22	10.1414	3.9e-05	downregulated	43	25.7997	6.2e-12	downregulated	38	23.9234	4.1e-11
vesicle docking	GO	5 out of 7	65.1138	upregulated	5	7.61816	0.0005	upregulated	3	4.43186	0.0119	downregulated	4	0.455545	0.6341	downregulated	2	0.843805	0.4301	downregulated	10	9.53907	7.2e-05	downregulated	21	21.0968	6.9e-10	downregulated	22	23.7273	5e-11
synaptic vesicle recycling	GO	5 out of 7	64.7966	upregulated	3	2.32915	0.0974					upregulated	2	1.31492	0.2685	downregulated	2	1.12094	0.326	downregulated	10	8.96055	0.0001	downregulated	19	25.5761	7.8e-12	downregulated	16	27.7368	9e-13
neuromuscular process	GO	7 out of 7	64.0014	upregulated	3	3.0281	0.0484	upregulated	1	0.0259464	0.9744	upregulated	3	1.29667	0.2734	upregulated	1	1.73808	0.1759	downregulated	14	12.3937	4.1e-06	downregulated	26	23.9355	4e-11	downregulated	26	21.5834	4.2e-10
modulation of excitatory postsynaptic potential	GO	6 out of 7	63.6695	upregulated	3	3.69438	0.0249	downregulated	2	3.64562	0.0261	upregulated	4	5.37591	0.0046	upregulated	4	9.51692	7.4e-05	downregulated	6	14.0924	7.6e-07	downregulated	13	18.4793	9.4e-09	downregulated	14	16.1561	9.6e-08
channel regulator activity	GO	6 out of 7	63.4845	upregulated	15	14.9566	3.2e-07	upregulated	4	3.37356	0.0343	upregulated	2	1.02801	0.3577	downregulated	2	0.210597	0.8101	downregulated	15	8.02213	0.0003	downregulated	30	19.9828	2.1e-09	downregulated	26	16.3321	8.1e-08
regulation of neurotransmitter secretion	GO	6 out of 7	62.264	upregulated	6	3.43944	0.0321	upregulated	1	2.99185	0.0502	upregulated	4	2.42106	0.0888	downregulated	2	1.44975	0.2346	downregulated	11	8.4776	0.0002	downregulated	26	24.6819	1.9e-11	downregulated	21	21.7019	3.8e-10
energy derivation by oxidation of organic compounds	GO	6 out of 7	62.1978	upregulated	10	1.73062	0.1772	upregulated	9	2.75961	0.0633	upregulated	6	2.32004	0.0983	downregulated	7	2.04293	0.1296	downregulated	30	15.8822	1.3e-07	downregulated	48	25.0171	1.4e-11	downregulated	37	16.5311	6.6e-08
regulation of synaptic vesicle transport	GO	5 out of 7	62.036	upregulated	3	1.71058	0.1808					upregulated	3	3.01561	0.049	downregulated	1	1.16132	0.3131	downregulated	9	10.6142	2.5e-05	downregulated	19	28.1119	6.2e-13	downregulated	15	19.745	2.7e-09
regulation of dendrite morphogenesis	GO	7 out of 7	59.6421	upregulated	9	2.94339	0.0527	upregulated	5	2.74189	0.0644	upregulated	4	3.52173	0.0295	upregulated	4	6.28942	0.0019	downregulated	11	5.69741	0.0034	downregulated	25	21.3263	5.5e-10	downregulated	23	17.122	3.7e-08
phenol-containing compound metabolic process	GO	5 out of 7	58.6963	upregulated	5	1.7938	0.1663	upregulated	2	4.3338	0.0131	upregulated	4	2.76784	0.0628	downregulated	5	3.51999	0.0296	downregulated	10	16.107	1e-07	downregulated	13	22.3535	2e-10	downregulated	14	17.6282	2.2e-08
syntaxin binding	GO	5 out of 7	57.7564	upregulated	4	3.77177	0.023	upregulated	3	0.725	0.4843	downregulated	6	0.97299	0.378	downregulated	5	2.63467	0.0717	downregulated	7	4.81819	0.0081	downregulated	23	29.2294	2e-13	downregulated	22	22.8197	1.2e-10
regulation of postsynapse organization	GO	6 out of 7	57.0646	upregulated	5	1.24007	0.2894	upregulated	3	2.42245	0.0887	upregulated	4	3.33597	0.0356	upregulated	5	9.71675	6e-05	downregulated	8	4.43903	0.0118	downregulated	20	19.9569	2.2e-09	downregulated	18	18.3759	1e-08
regulation of neurological system process	GO	6 out of 7	56.6589	upregulated	5	5.57161	0.0038	downregulated	2	2.77053	0.0626	upregulated	7	5.24991	0.0052	upregulated	5	8.45392	0.0002	downregulated	11	10.1458	3.9e-05	downregulated	22	16.0119	1.1e-07	downregulated	23	13.9963	8.3e-07
tubulin binding	GO	5 out of 7	55.7937	upregulated	21	4.42685	0.012	upregulated	13	1.7345	0.1765	downregulated	35	9.83566	5.4e-05	downregulated	21	6.52196	0.0015	downregulated	37	9.32926	8.9e-05	downregulated	76	28.8708	2.9e-13	downregulated	69	27.79	8.5e-13
pigmentation	GO	7 out of 7	54.9092	upregulated	6	5.51577	0.004	upregulated	2	1.86349	0.1551	upregulated	5	2.34505	0.0958	upregulated	1	0.858337	0.4239	downregulated	19	17.6423	2.2e-08	downregulated	23	15.1214	2.7e-07	downregulated	18	11.5629	9.5e-06
presynaptic active zone	GO	5 out of 7	54.9087	upregulated	4	9.33466	8.8e-05	downregulated	1	1.33892	0.2621	upregulated	2	2.41407	0.0895					downregulated	3	4.99219	0.0068	downregulated	19	20.3691	1.4e-09	downregulated	16	19.1377	4.9e-09
cofactor binding	GO	5 out of 7	54.576	downregulated	10	1.21295	0.2973	upregulated	25	7.89361	0.0004	upregulated	17	4.46405	0.0115	upregulated	8	6.47206	0.0015	downregulated	54	21.1056	6.8e-10	downregulated	71	12.0013	6.1e-06	downregulated	63	10.3245	3.3e-05
regulation of synaptic vesicle exocytosis	GO	5 out of 7	54.5137	upregulated	2	0.99181	0.3709					upregulated	3	3.32933	0.0358	downregulated	1	1.2665	0.2818	downregulated	7	8.06724	0.0003	downregulated	17	25.7891	6.3e-12	downregulated	14	17.6027	2.3e-08
dendrite development	GO	5 out of 7	54.3798	downregulated	6	4.04575	0.0175	downregulated	4	2.81122	0.0601	upregulated	8	3.62132	0.0267	upregulated	2	2.18307	0.1127	downregulated	7	4.72718	0.0089	downregulated	34	26.7866	2.3e-12	downregulated	29	23.9186	4.1e-11
presynaptic membrane	GO	5 out of 7	52.1718	upregulated	6	3.60336	0.0272					downregulated	3	2.44499	0.0867	upregulated	1	2.60145	0.0742	downregulated	8	9.26614	9.5e-05	downregulated	22	18.5239	9e-09	downregulated	16	18.177	1.3e-08
positive regulation of excitatory postsynaptic potential	GO	6 out of 7	52.1253	upregulated	3	4.69189	0.0092					upregulated	2	2.44974	0.0863	upregulated	2	6.1138	0.0022	downregulated	4	8.95436	0.0001	downregulated	10	15.516	1.8e-07	downregulated	11	14.3995	5.6e-07
Golgi vesicle transport	GO	4 out of 7	51.3625	downregulated	6	1.35555	0.2578	upregulated	15	1.19134	0.3038	downregulated	27	1.94947	0.1424	downregulated	16	2.40102	0.0906	downregulated	40	12.4863	3.8e-06	downregulated	73	24.0772	3.5e-11	downregulated	67	19.3137	4.1e-09
vesicle organization	GO	6 out of 7	49.384	upregulated	14	3.05366	0.0472	upregulated	16	3.54275	0.0289	upregulated	10	1.51831	0.2191	downregulated	16	2.98513	0.0505	downregulated	29	7.74703	0.0004	downregulated	62	17.511	2.5e-08	downregulated	60	18.9963	5.6e-09
translation repressor activity	GO	6 out of 7	49.1988					upregulated	1	5.52658	0.004	upregulated	5	5.79315	0.003	upregulated	1	3.64445	0.0261	downregulated	4	10.7852	2.1e-05	downregulated	5	12.0056	6.1e-06	downregulated	5	11.4439	1.1e-05
memory	GO	7 out of 7	49.0602	upregulated	5	5.34556	0.0048	upregulated	3	2.41923	0.089	upregulated	7	4.02848	0.0178	upregulated	4	6.02831	0.0024	downregulated	8	6.38898	0.0017	downregulated	23	17.0389	4e-08	downregulated	19	7.81073	0.0004
response to alkaloid	GO	5 out of 7	48.5391	upregulated	5	3.07425	0.0462	downregulated	1	2.43774	0.0874	upregulated	4	2.91511	0.0542	downregulated	2	0.231184	0.7936	downregulated	12	15.7371	1.5e-07	downregulated	16	15.8354	1.3e-07	downregulated	15	13.6462	1.2e-06
neuron projection guidance	GO	4 out of 7	48.4549	upregulated	15	4.91286	0.0074	downregulated	3	0.304245	0.7377	downregulated	20	6.25158	0.0019	downregulated	14	4.0691	0.0171	downregulated	20	15.1677	2.6e-07	downregulated	51	23.2911	7.7e-11	downregulated	39	15.7081	1.5e-07
axon guidance	GO	4 out of 7	48.0877	upregulated	15	4.95215	0.0071	downregulated	3	0.30954	0.7338	downregulated	20	6.33959	0.0018	downregulated	14	4.11551	0.0163	downregulated	20	15.2793	2.3e-07	downregulated	50	22.6826	1.4e-10	downregulated	39	15.9383	1.2e-07
regulation of hormone secretion	GO	7 out of 7	47.1364	upregulated	9	2.12311	0.1197	upregulated	9	1.18763	0.3049	upregulated	14	3.62545	0.0266	upregulated	5	2.91102	0.0544	downregulated	23	8.14195	0.0003	downregulated	45	18.4506	9.7e-09	downregulated	38	10.6967	2.3e-05
response to xenobiotic stimulus	GO	4 out of 7	46.8939	downregulated	5	3.77494	0.0229	upregulated	9	3.24854	0.0388	upregulated	7	1.86658	0.1547	downregulated	7	1.66861	0.1885	downregulated	26	20.4152	1.4e-09	downregulated	38	15.8131	1.4e-07	downregulated	36	14.2426	6.5e-07
protein-containing complex disassembly	GO	5 out of 7	46.4546	upregulated	16	2.91628	0.0541	upregulated	13	2.74036	0.0645	downregulated	11	1.28596	0.2764	downregulated	8	1.26364	0.2826	downregulated	26	13.9744	8.5e-07	downregulated	40	13.0298	2.2e-06	downregulated	45	16.3433	8e-08
dendritic spine	GO	6 out of 7	46.3501	upregulated	12	7.54659	0.0005	downregulated	7	3.3794	0.0341	upregulated	11	4.38466	0.0125	upregulated	5	5.41856	0.0044	downregulated	12	4.55122	0.0106	downregulated	35	12.8913	2.5e-06	downregulated	32	14.9372	3.3e-07
passive transmembrane transporter activity	GO	4 out of 7	45.9517	upregulated	24	13.0557	2.1e-06	downregulated	6	1.2015	0.3007	downregulated	26	8.11757	0.0003	downregulated	15	3.00019	0.0498	downregulated	31	8.33263	0.0002	downregulated	67	22.0326	2.7e-10	downregulated	58	14.8502	3.6e-07
clathrin binding	GO	4 out of 7	45.7799	upregulated	3	2.46979	0.0846	downregulated	1	0.626826	0.5343	downregulated	5	2.7442	0.0643	downregulated	1	2.36766	0.0937	downregulated	6	2.5349	0.0793	downregulated	23	26.1661	4.3e-12	downregulated	17	20.3478	1.5e-09
pigment granule localization	GO	5 out of 7	45.5002	upregulated	4	4.65905	0.0095					upregulated	3	3.8838	0.0206					downregulated	8	11.3608	1.2e-05	downregulated	11	13.1641	1.9e-06	downregulated	9	12.4324	4e-06
organelle transport along microtubule	GO	3 out of 7	44.9695	downregulated	2	2.68223	0.0684	downregulated	2	3.27522	0.0378	downregulated	5	1.93702	0.1441	downregulated	1	1.24792	0.2871	downregulated	6	3.36519	0.0346	downregulated	26	23.1499	8.8e-11	downregulated	22	24.9145	1.5e-11
proton-transporting two-sector ATPase complex	GO	6 out of 7	44.8981	upregulated	2	1.07977	0.3397	upregulated	1	1.90614	0.1487	upregulated	1	1.6954	0.1835	downregulated	1	0.387871	0.6785	downregulated	4	4.42623	0.012	downregulated	14	22.9875	1e-10	downregulated	11	13.1909	1.9e-06
regulation of synaptic vesicle recycling	GO	5 out of 7	44.7727	upregulated	3	5.53745	0.0039					upregulated	1	2.49179	0.0828	downregulated	2	2.34029	0.0963	downregulated	6	9.58832	6.9e-05	downregulated	11	16.4606	7.1e-08	downregulated	9	13.0349	2.2e-06
cellular respiration	GO	6 out of 7	44.5099	upregulated	8	1.64558	0.1929	upregulated	8	3.79241	0.0225	upregulated	4	1.81115	0.1635	downregulated	3	1.32457	0.2659	downregulated	18	9.49342	7.5e-05	downregulated	35	16.2335	8.9e-08	downregulated	26	12.8584	2.6e-06
neurotransmitter receptor activity	GO	6 out of 7	43.7387	upregulated	7	10.1093	4.1e-05	downregulated	1	1.52399	0.2178	upregulated	4	7.15034	0.0008	upregulated	1	3.45706	0.0315	downregulated	9	7.4657	0.0006	downregulated	14	6.08296	0.0023	downregulated	15	10.9973	1.7e-05
translation regulator activity	GO	7 out of 7	43.6208	upregulated	2	0.543978	0.5804	upregulated	3	4.71765	0.0089	upregulated	6	4.64257	0.0096	upregulated	2	3.0476	0.0475	downregulated	6	11.8492	7.1e-06	downregulated	9	9.84147	5.3e-05	downregulated	9	8.97827	0.0001
microtubule-based transport	GO	5 out of 7	43.4923	upregulated	9	2.67143	0.0692	upregulated	9	3.17859	0.0416	upregulated	4	1.87877	0.1528	downregulated	4	0.748672	0.473	downregulated	13	2.7672	0.0628	downregulated	39	15.8578	1.3e-07	downregulated	30	20.5586	1.2e-09
adult locomotory behavior	GO	3 out of 7	42.4774	upregulated	5	3.12261	0.044					downregulated	6	3.74951	0.0235	downregulated	7	7.54461	0.0005	downregulated	12	14.9066	3.4e-07	downregulated	20	21.2318	6e-10	downregulated	18	17.633	2.2e-08
voltage-gated potassium channel complex	GO	4 out of 7	42.428	upregulated	6	7.4807	0.0006					downregulated	3	2.55337	0.0778	downregulated	2	1.5971	0.2025	downregulated	8	6.83136	0.0011	downregulated	20	15.9529	1.2e-07	downregulated	18	16.3135	8.2e-08
endosomal transport	GO	6 out of 7	41.951	upregulated	13	3.12298	0.044	upregulated	8	1.36883	0.2544	upregulated	10	4.98914	0.0068	downregulated	14	4.28182	0.0138	downregulated	22	5.5732	0.0038	downregulated	40	14.0679	7.8e-07	downregulated	31	12.829	2.7e-06
regulation of heart contraction	GO	5 out of 7	41.9276	downregulated	3	1.68786	0.1849	upregulated	6	4.08454	0.0168	downregulated	13	1.26253	0.2829	upregulated	3	1.33202	0.2639	downregulated	18	11.8677	7e-06	downregulated	35	16.4432	7.2e-08	downregulated	26	11.1506	1.4e-05
axolemma	GO	6 out of 7	41.9115	upregulated	1	2.5685	0.0767	downregulated	1	0.998093	0.3686	upregulated	1	7.6045	0.0005	upregulated	1	4.00194	0.0183	downregulated	3	9.82965	5.4e-05	downregulated	5	7.79971	0.0004	downregulated	4	11.1053	1.5e-05
sensory perception of pain	GO	6 out of 7	41.6707	upregulated	7	9.86933	5.2e-05	upregulated	1	2.23795	0.1067	upregulated	4	6.69858	0.0012	downregulated	5	4.52855	0.0108	downregulated	7	5.19784	0.0055	downregulated	16	12.2311	4.9e-06	downregulated	13	9.96444	4.7e-05
cellular pigmentation	GO	5 out of 7	41.3806	upregulated	4	3.19232	0.0411					upregulated	4	3.40305	0.0333					downregulated	10	11.0905	1.5e-05	downregulated	15	12.4816	3.8e-06	downregulated	12	11.2132	1.3e-05
negative regulation of transport	GO	5 out of 7	41.3427	upregulated	19	2.11193	0.121	upregulated	15	6.88076	0.001	downregulated	26	3.38901	0.0337	downregulated	20	3.26979	0.038	downregulated	41	9.29991	9.1e-05	downregulated	60	12.9058	2.5e-06	downregulated	57	16.8031	5e-08
cerebellum development	GO	5 out of 7	41.24	upregulated	4	2.36793	0.0937	upregulated	5	2.56118	0.0772	downregulated	8	3.5035	0.0301	downregulated	2	0.354396	0.7016	downregulated	15	12.7159	3e-06	downregulated	20	14.8865	3.4e-07	downregulated	21	12.5664	3.5e-06
dopamine binding	GO	4 out of 7	41.0624									upregulated	1	2.6608	0.0699					downregulated	3	13.5558	1.3e-06	downregulated	2	13.8344	9.8e-07	downregulated	2	11.0113	1.7e-05
social behavior	GO	6 out of 7	41.0549	upregulated	4	3.21838	0.04					upregulated	5	4.394	0.0124	upregulated	2	3.54682	0.0288	downregulated	6	8.12281	0.0003	downregulated	13	12.5472	3.6e-06	downregulated	10	9.22566	9.8e-05
amino acid binding	GO	7 out of 7	40.5384	upregulated	2	1.68981	0.1846	upregulated	4	5.65545	0.0035	upregulated	6	5.75405	0.0032	upregulated	1	2.95422	0.0521	downregulated	5	8.91815	0.0001	downregulated	11	7.19978	0.0007	downregulated	8	8.36699	0.0002
multicellular organismal response to stress	GO	6 out of 7	40.0029	downregulated	2	0.782505	0.4573	upregulated	1	2.02086	0.1325	upregulated	6	8.48682	0.0002	upregulated	1	1.9766	0.1385	downregulated	5	9.9083	5e-05	downregulated	13	12.2822	4.6e-06	downregulated	11	6.11058	0.0022
regulation of response to drug	GO	5 out of 7	39.9638	upregulated	6	6.44315	0.0016	upregulated	3	2.36557	0.0939	downregulated	8	3.21338	0.0402	downregulated	3	2.30836	0.0994	downregulated	13	9.7765	5.7e-05	downregulated	17	16.2383	8.9e-08	downregulated	13	10.662	2.3e-05
divalent inorganic cation homeostasis	GO	5 out of 7	39.4574	upregulated	13	7.32632	0.0007	upregulated	12	5.96567	0.0026	downregulated	25	6.16494	0.0021	downregulated	12	1.49884	0.2234	downregulated	22	3.91293	0.02	downregulated	61	17.7825	1.9e-08	downregulated	54	12.1338	5.4e-06
cilium organization	GO	7 out of 7	39.1428	upregulated	28	7.18773	0.0008	upregulated	25	10.4411	2.9e-05	upregulated	11	1.44366	0.2361	upregulated	3	0.707268	0.493	downregulated	40	9.41364	8.2e-05	downregulated	53	5.77144	0.0031	downregulated	41	4.17802	0.0153
anchored component of membrane	GO	6 out of 7	38.8108	upregulated	6	5.01113	0.0067	upregulated	1	0.20195	0.8171	upregulated	10	11.5408	9.7e-06	upregulated	5	7.53952	0.0005	upregulated	6	1.93065	0.1451	downregulated	17	6.69623	0.0012	downregulated	18	9.75175	5.8e-05
cell surface receptor signaling pathway involved in cell-cell signaling	GO	6 out of 7	38.71	upregulated	22	4.03407	0.0177	downregulated	6	2.98656	0.0505	upregulated	12	2.85662	0.0575	upregulated	4	1.69473	0.1836	downregulated	33	9.83671	5.3e-05	downregulated	56	11.4255	1.1e-05	downregulated	52	11.8489	7.1e-06
metencephalon development	GO	5 out of 7	38.1365	upregulated	4	2.29332	0.1009	upregulated	5	2.29257	0.101	downregulated	8	3.25999	0.0384	downregulated	2	0.298959	0.7416	downregulated	15	11.5407	9.7e-06	downregulated	21	14.4793	5.1e-07	downregulated	21	11.0896	1.5e-05
tricarboxylic acid metabolic process	GO	5 out of 7	37.9023	upregulated	2	0.693252	0.4999					upregulated	3	3.21846	0.04					downregulated	7	6.47396	0.0015	downregulated	15	12.8829	2.5e-06	downregulated	14	14.6337	4.4e-07
GABA receptor complex	GO	6 out of 7	37.8438	upregulated	4	10.2766	3.4e-05					upregulated	1	4.51277	0.011	upregulated	1	4.95268	0.0071	downregulated	2	2.6134	0.0733	downregulated	4	5.81009	0.003	downregulated	5	9.67824	6.3e-05
ATP hydrolysis coupled cation transmembrane transport	GO	4 out of 7	37.7494	downregulated	1	0.323325	0.7237					upregulated	2	0.746013	0.4743					downregulated	5	2.41453	0.0894	downregulated	21	19.8209	2.5e-09	downregulated	16	15.0913	2.8e-07
regulation of cation channel activity	GO	5 out of 7	37.7207	upregulated	13	10.8918	1.9e-05	downregulated	4	1.50783	0.2214	upregulated	5	1.01145	0.3637	downregulated	2	2.72108	0.0658	downregulated	17	5.0396	0.0065	downregulated	27	12.7773	2.8e-06	downregulated	26	12.2295	4.9e-06
response to anesthetic	GO	5 out of 7	37.5068	upregulated	4	3.9939	0.0184	downregulated	1	2.21102	0.1096	upregulated	4	4.13944	0.0159	downregulated	2	0.510042	0.6005	downregulated	9	12.7107	3e-06	downregulated	13	12.0056	6.1e-06	downregulated	10	7.37824	0.0006
proton-exporting ATPase activity	GO	5 out of 7	37.4643	upregulated	1	0.237621	0.7885					upregulated	1	0.613312	0.5416					downregulated	3	3.36682	0.0345	downregulated	12	18.37	1.1e-08	downregulated	11	14.8765	3.5e-07
NAD binding	GO	5 out of 7	37.2719	downregulated	1	1.5744	0.2071	upregulated	2	0.916277	0.4	upregulated	2	1.66204	0.1898	upregulated	2	4.59994	0.0101	downregulated	15	16.0611	1.1e-07	downregulated	13	7.51973	0.0005	downregulated	14	9.74926	5.8e-05
vitamin binding	GO	7 out of 7	37.1569	upregulated	5	4.32797	0.0132	upregulated	8	6.68239	0.0013	upregulated	8	5.23432	0.0053	upregulated	3	2.97664	0.051	downregulated	18	10.5486	2.6e-05	downregulated	18	3.76002	0.0233	downregulated	15	3.62697	0.0266
establishment of protein localization to mitochondrion	GO	5 out of 7	37.0358	upregulated	6	1.99799	0.1356					upregulated	3	2.1654	0.1147					downregulated	12	11.2945	1.2e-05	downregulated	19	11.74	8e-06	downregulated	14	9.83797	5.3e-05
forebrain development	GO	6 out of 7	36.9432	upregulated	15	1.05395	0.3486	upregulated	10	3.83786	0.0215	downregulated	26	8.46669	0.0002	upregulated	8	3.00721	0.0494	downregulated	38	12.2713	4.7e-06	downregulated	58	13.5602	1.3e-06	downregulated	47	11.6795	8.5e-06
SNARE complex	GO	5 out of 7	36.882	upregulated	3	3.51828	0.0297	upregulated	4	3.12167	0.0441	downregulated	3	0.415372	0.6601	downregulated	2	1.10444	0.3314	downregulated	8	7.28812	0.0007	downregulated	13	13.8724	9.4e-07	downregulated	15	10.6013	2.5e-05
regulation of renal sodium excretion	GO	6 out of 7	36.7433					upregulated	1	3.65017	0.026	upregulated	3	3.97414	0.0188	upregulated	2	5.33728	0.0048	downregulated	3	8.3047	0.0002	downregulated	4	9.83508	5.4e-05	downregulated	3	5.64196	0.0035
ATP hydrolysis coupled transmembrane transport	GO	5 out of 7	36.7266	downregulated	2	1.22149	0.2948	upregulated	1	0.110595	0.8953	upregulated	2	0.724206	0.4847					downregulated	5	2.35017	0.0954	downregulated	20	19.6718	2.9e-09	downregulated	16	15.0913	2.8e-07
ATP hydrolysis coupled ion transmembrane transport	GO	5 out of 7	36.7266	downregulated	2	1.22149	0.2948	upregulated	1	0.110595	0.8953	upregulated	2	0.724206	0.4847					downregulated	5	2.35017	0.0954	downregulated	20	19.6718	2.9e-09	downregulated	16	15.0913	2.8e-07
regulation of intracellular transport	GO	4 out of 7	36.6143	upregulated	21	3.384	0.0339	downregulated	4	1.95655	0.1413	downregulated	28	3.47368	0.031	downregulated	23	5.25475	0.0052	downregulated	41	9.1549	0.0001	downregulated	67	18.027	1.5e-08	downregulated	63	16.7334	5.4e-08
sodium ion transmembrane transport	GO	6 out of 7	36.4763	upregulated	5	3.35623	0.0349	upregulated	1	0.0790384	0.924	upregulated	4	6.83004	0.0011	downregulated	3	0.844632	0.4297	downregulated	9	6.90077	0.001	downregulated	24	11.5789	9.4e-06	downregulated	19	8.57595	0.0002
lyase activity	GO	7 out of 7	36.4252	upregulated	9	4.99695	0.0068	upregulated	8	2.73935	0.0646	upregulated	9	5.39768	0.0045	upregulated	4	4.9939	0.0068	downregulated	20	10.6295	2.4e-05	downregulated	24	3.22479	0.0398	downregulated	24	4.44301	0.0118
dendrite morphogenesis	GO	5 out of 7	36.0295	downregulated	4	5.1353	0.0059	downregulated	3	3.29602	0.037	upregulated	4	1.93787	0.144	upregulated	2	3.03526	0.0481	downregulated	4	4.7314	0.0088	downregulated	20	19.5239	3.3e-09	downregulated	17	15.2323	2.4e-07
multicellular organism aging	GO	5 out of 7	35.1685					upregulated	1	0.417358	0.6588	upregulated	2	7.01671	0.0009	downregulated	1	0.839474	0.4319	downregulated	4	10.2364	3.6e-05	downregulated	2	8.58222	0.0002	downregulated	4	9.75524	5.8e-05
toxin metabolic process	GO	5 out of 7	35.0388	upregulated	2	2.24707	0.1057	upregulated	1	1.07838	0.3401	downregulated	1	0.823507	0.4389					downregulated	2	11.5792	9.4e-06	downregulated	3	9.94752	4.8e-05	downregulated	5	11.0101	1.7e-05
regulation of blood circulation	GO	4 out of 7	34.8779	downregulated	4	3.86166	0.021	upregulated	8	3.58376	0.0278	downregulated	17	3.55541	0.0286	downregulated	11	2.84128	0.0584	downregulated	20	13.5095	1.4e-06	downregulated	38	17.0274	4e-08	downregulated	30	11.0155	1.6e-05
blood circulation	GO	5 out of 7	34.518	upregulated	15	10.8291	2e-05	downregulated	7	3.35172	0.035	upregulated	18	5.76186	0.0031	downregulated	11	3.63939	0.0263	downregulated	26	9.14634	0.0001	downregulated	41	8.69764	0.0002	downregulated	32	7.07415	0.0008
acid secretion	GO	6 out of 7	34.4847	upregulated	2	3.32844	0.0358	upregulated	1	0.119722	0.8872	upregulated	3	6.15366	0.0021	downregulated	1	1.96343	0.1404	downregulated	6	3.20609	0.0405	downregulated	11	14.8634	3.5e-07	downregulated	11	8.77689	0.0002
regulation of axonogenesis	GO	4 out of 7	34.1408	downregulated	6	6.40808	0.0016	upregulated	5	0.848376	0.4281	downregulated	22	13.4123	1.5e-06	downregulated	14	5.77679	0.0031	downregulated	20	12.3935	4.1e-06	downregulated	48	22.9473	1.1e-10	downregulated	39	23.5488	5.9e-11
GABA-A receptor complex	GO	6 out of 7	33.5764	upregulated	4	10.4368	2.9e-05					upregulated	1	4.60993	0.01	upregulated	1	5.05002	0.0064	downregulated	2	2.70422	0.0669	downregulated	3	3.53547	0.0291	downregulated	4	7.2399	0.0007
pyridoxal phosphate binding	GO	7 out of 7	33.3907	upregulated	2	1.82344	0.1615	upregulated	2	2.36621	0.0938	upregulated	5	4.83151	0.008	upregulated	2	3.09774	0.0452	downregulated	9	8.87365	0.0001	downregulated	10	7.46983	0.0006	downregulated	9	4.92835	0.0072
axon cytoplasm	GO	5 out of 7	33.3272	upregulated	5	2.99264	0.0502	downregulated	2	1.2638	0.2826	upregulated	2	1.54104	0.2142	upregulated	1	1.46225	0.2317	downregulated	3	2.71856	0.066	downregulated	17	13.135	2e-06	downregulated	16	15.4601	1.9e-07
neuron projection extension	GO	5 out of 7	33.2448	upregulated	3	2.24281	0.1062	upregulated	3	3.1038	0.0449	downregulated	4	2.65705	0.0702	downregulated	3	2.57529	0.0761	downregulated	6	6.94115	0.001	downregulated	15	12.1448	5.3e-06	downregulated	16	14.0446	8e-07
developmental growth	GO	6 out of 7	33.2243	downregulated	13	2.11098	0.1211	upregulated	8	3.37029	0.0344	upregulated	15	6.06004	0.0023	upregulated	6	4.34663	0.013	downregulated	22	7.82332	0.0004	downregulated	48	8.05247	0.0003	downregulated	43	5.68257	0.0034
negative regulation of supramolecular fiber organization	GO	6 out of 7	33.1571	upregulated	13	4.27664	0.0139	upregulated	8	1.89533	0.1503	upregulated	6	1.79168	0.1667	downregulated	5	5.48423	0.0042	downregulated	19	9.63934	6.5e-05	downregulated	27	10.192	3.7e-05	downregulated	26	10.8464	1.9e-05
membrane depolarization during action potential	GO	5 out of 7	33.0694	upregulated	4	6.38328	0.0017	downregulated	1	1.1864	0.3053	upregulated	2	1.56908	0.2082					downregulated	1	2.03501	0.1307	downregulated	10	12.7786	2.8e-06	downregulated	8	11.4899	1e-05
modified amino acid binding	GO	6 out of 7	33.003	upregulated	3	1.15652	0.3146	upregulated	3	6.30373	0.0018	upregulated	3	1.00775	0.365	downregulated	3	5.89371	0.0028	downregulated	12	8.91703	0.0001	downregulated	17	11.3777	1.1e-05	downregulated	11	10.1339	4e-05
positive regulation of dendrite extension	GO	4 out of 7	32.8271					downregulated	1	2.95168	0.0523	upregulated	2	2.73822	0.0647	downregulated	2	2.13526	0.1182	downregulated	3	3.59929	0.0273	downregulated	10	17.6382	2.2e-08	downregulated	9	13.9383	8.8e-07
feeding behavior	GO	7 out of 7	32.7754	upregulated	6	5.80826	0.003	upregulated	2	0.884521	0.4129	upregulated	3	1.86163	0.1554	upregulated	1	0.73398	0.48	downregulated	5	5.66935	0.0035	downregulated	11	9.85002	5.3e-05	downregulated	10	7.96768	0.0003
circadian rhythm	GO	7 out of 7	32.758	upregulated	8	2.25304	0.1051	upregulated	8	4.68925	0.0092	upregulated	7	3.52738	0.0294	upregulated	4	3.9217	0.0198	downregulated	9	6.8655	0.001	downregulated	17	5.1774	0.0056	downregulated	13	6.32375	0.0018
regulation of potassium ion transmembrane transport	GO	7 out of 7	32.3957	upregulated	6	3.83026	0.0217	upregulated	2	1.86717	0.1546	upregulated	4	2.87133	0.0566	upregulated	1	2.0066	0.1344	downregulated	6	2.44577	0.0867	downregulated	16	9.37909	8.4e-05	downregulated	13	9.99546	4.6e-05
circadian behavior	GO	6 out of 7	32.3725	upregulated	2	3.95866	0.0191					upregulated	2	3.26789	0.0381	upregulated	2	6.02297	0.0024	downregulated	2	6.2641	0.0019	downregulated	4	6.77572	0.0011	downregulated	4	6.08314	0.0023
rhythmic behavior	GO	6 out of 7	32.2066	upregulated	2	3.92284	0.0198					upregulated	2	3.23325	0.0394	upregulated	2	5.9854	0.0025	downregulated	2	6.24506	0.0019	downregulated	4	6.75631	0.0012	downregulated	4	6.06373	0.0023
negative regulation of neuron death	GO	5 out of 7	31.9641	upregulated	13	5.47806	0.0042	upregulated	3	1.74655	0.1744	downregulated	12	4.25632	0.0142	downregulated	7	1.20454	0.2998	downregulated	16	3.35267	0.035	downregulated	28	11.2568	1.3e-05	downregulated	35	15.5909	1.7e-07
positive regulation of renal sodium excretion	GO	6 out of 7	31.5882					upregulated	1	4.02911	0.0178	upregulated	3	4.90902	0.0074	upregulated	2	6.01302	0.0024	downregulated	2	5.76527	0.0031	downregulated	3	7.75648	0.0004	downregulated	2	3.11533	0.0444
regulation of high voltage-gated calcium channel activity	GO	5 out of 7	31.5813	upregulated	4	11.1062	1.5e-05					upregulated	2	2.67888	0.0686					downregulated	4	7.29842	0.0007	downregulated	6	7.2832	0.0007	downregulated	4	3.21465	0.0402
axonal transport	GO	4 out of 7	31.4639	downregulated	2	2.98459	0.0506	downregulated	2	1.13841	0.3203	upregulated	2	1.39359	0.2482	upregulated	1	1.38118	0.2513	downregulated	4	2.57109	0.0765	downregulated	19	13.2137	1.8e-06	downregulated	18	16.6139	6.1e-08
sodium channel regulator activity	GO	4 out of 7	31.27	upregulated	3	6.91906	0.001	downregulated	1	2.50737	0.0815									downregulated	4	5.46456	0.0042	downregulated	8	10.7309	2.2e-05	downregulated	9	10.6628	2.3e-05
retina development in camera-type eye	GO	5 out of 7	31.2269	upregulated	10	5.4455	0.0043	upregulated	5	2.35291	0.0951	downregulated	9	2.778	0.0622	downregulated	6	1.30888	0.2701	downregulated	12	6.9046	0.001	downregulated	21	12.2683	4.7e-06	downregulated	15	8.34255	0.0002
hindbrain development	GO	5 out of 7	31.1488	upregulated	5	1.98689	0.1371	upregulated	6	2.30547	0.0997	downregulated	8	2.31406	0.0989	downregulated	3	0.37508	0.6872	downregulated	16	8.05655	0.0003	downregulated	24	11.5952	9.2e-06	downregulated	24	9.89386	5e-05
mating behavior	GO	6 out of 7	31.1378					upregulated	1	1.19458	0.3028	upregulated	3	5.17733	0.0056	upregulated	2	5.52369	0.004	downregulated	1	6.30331	0.0018	downregulated	6	6.81573	0.0011	downregulated	3	6.12312	0.0022
regulation of calcium ion transmembrane transport	GO	5 out of 7	31.133	upregulated	10	5.30233	0.005	downregulated	2	3.84758	0.0213	downregulated	7	2.464	0.0851	upregulated	1	0.655263	0.5193	downregulated	14	5.74942	0.0032	downregulated	25	14.949	3.2e-07	downregulated	22	10.7886	2.1e-05
proton-transporting two-sector ATPase complex, catalytic domain	GO	2 out of 7	30.9534																	upregulated	1	0.429843	0.6506	downregulated	8	16.3092	8.3e-08	downregulated	7	15.0741	2.8e-07
mating	GO	7 out of 7	30.5478	upregulated	1	1.04327	0.3523	upregulated	1	0.801582	0.4486	upregulated	4	5.59543	0.0037	upregulated	2	4.7108	0.009	downregulated	3	6.30889	0.0018	downregulated	7	6.39006	0.0017	downregulated	3	5.69774	0.0034
regulation of cell size	GO	5 out of 7	30.5097	upregulated	8	2.34804	0.0956	upregulated	6	0.934858	0.3926	downregulated	17	6.86542	0.001	downregulated	12	4.55115	0.0106	downregulated	17	9.76299	5.8e-05	downregulated	38	11.6009	9.2e-06	downregulated	32	17.2795	3.1e-08
ATP metabolic process	GO	4 out of 7	30.4533	upregulated	7	0.835279	0.4338	downregulated	3	1.35707	0.2574	upregulated	5	2.20918	0.1098	downregulated	2	0.168818	0.8447	upregulated	11	6.76829	0.0011	downregulated	39	21.5835	4.2e-10	downregulated	29	14.1195	7.4e-07
regulation of sequestering of calcium ion	GO	4 out of 7	30.4043	upregulated	5	1.93546	0.1444	downregulated	2	2.96665	0.0515	downregulated	8	4.31139	0.0134	downregulated	4	1.46449	0.2312	downregulated	11	7.56823	0.0005	downregulated	26	17.5956	2.3e-08	downregulated	20	12.0475	5.9e-06
response to toxic substance	GO	4 out of 7	30.2814	downregulated	12	2.83158	0.0589	upregulated	17	3.90723	0.0201	downregulated	33	8.27242	0.0003	downregulated	24	7.17831	0.0008	downregulated	46	21.6381	4e-10	downregulated	62	10.8742	1.9e-05	downregulated	50	12.1442	5.3e-06
regulation of dendrite extension	GO	4 out of 7	30.1805					downregulated	1	2.87381	0.0565	upregulated	2	2.66089	0.0699	downregulated	3	3.53564	0.0291	downregulated	3	3.46253	0.0314	downregulated	11	16.9982	4.1e-08	downregulated	9	13.4684	1.4e-06
subpallium development	GO	6 out of 7	30.0868	upregulated	1	1.74171	0.1752					upregulated	1	0.657126	0.5183	upregulated	1	2.47407	0.0842	downregulated	7	10.2043	3.7e-05	downregulated	6	7.84411	0.0004	downregulated	7	7.16547	0.0008
eating behavior	GO	7 out of 7	30.0825	upregulated	2	3.56741	0.0282	upregulated	1	1.0631	0.3454	upregulated	2	2.75885	0.0634	upregulated	1	1.694	0.1838	downregulated	1	6.25257	0.0019	downregulated	4	7.2832	0.0007	downregulated	3	7.46335	0.0006
proton-transporting ATP synthase complex	GO	6 out of 7	29.6487	upregulated	1	1.95504	0.1416	upregulated	1	2.96451	0.0516	upregulated	1	2.90512	0.0547					downregulated	2	3.71222	0.0244	downregulated	6	12.8571	2.6e-06	downregulated	3	5.25473	0.0052
carboxy-lyase activity	GO	6 out of 7	29.6327	downregulated	2	5.84615	0.0029	upregulated	3	3.12493	0.0439	upregulated	5	8.14633	0.0003	upregulated	2	8.26854	0.0003	downregulated	6	6.70655	0.0012	downregulated	6	4.19208	0.0151	downregulated	7	5.04038	0.0065
regulation of protein localization to membrane	GO	5 out of 7	29.5812	upregulated	10	2.18144	0.1129	downregulated	5	1.50327	0.2224	upregulated	7	3.01459	0.0491	downregulated	7	2.66584	0.0695	downregulated	14	2.14556	0.117	downregulated	32	15.7943	1.4e-07	downregulated	28	10.6144	2.5e-05
ribosome binding	GO	7 out of 7	29.4483	upregulated	1	0.0872456	0.9165	upregulated	3	2.36272	0.0942	upregulated	7	9.74077	5.9e-05	upregulated	2	3.34655	0.0352	downregulated	4	2.12135	0.1199	downregulated	11	7.9565	0.0004	downregulated	9	3.83319	0.0216
perikaryon	GO	6 out of 7	29.3087	upregulated	5	2.47407	0.0842	downregulated	3	2.61115	0.0735	upregulated	2	1.88082	0.1525	upregulated	1	0.871616	0.4183	downregulated	13	7.78571	0.0004	downregulated	25	10.9328	1.8e-05	downregulated	19	7.9748	0.0003
rhythmic process	GO	6 out of 7	28.9514	upregulated	20	4.60869	0.01	upregulated	12	4.25218	0.0142	upregulated	10	3.30183	0.0368	upregulated	6	5.2669	0.0052	downregulated	17	6.78452	0.0011	downregulated	32	4.2352	0.0145	downregulated	33	7.28661	0.0007
regulation of cardiac conduction	GO	5 out of 7	28.6815	downregulated	1	0.256353	0.7739	upregulated	3	4.52643	0.0108	upregulated	4	2.17103	0.1141	downregulated	3	1.15184	0.3161	downregulated	6	3.31125	0.0365	downregulated	15	10.3994	3e-05	downregulated	12	9.68157	6.2e-05
dendritic shaft	GO	5 out of 7	28.5444	upregulated	3	2.99858	0.0499	downregulated	2	2.2165	0.109	downregulated	3	4.87692	0.0076	upregulated	1	1.98116	0.1379	downregulated	5	4.28832	0.0137	downregulated	12	12.0467	5.9e-06	downregulated	12	14.323	6e-07
cell-cell adhesion via plasma-membrane adhesion molecules	GO	4 out of 7	28.4517	upregulated	13	8.37044	0.0002	downregulated	5	1.17288	0.3095	downregulated	16	8.48411	0.0002	downregulated	7	5.20656	0.0055	downregulated	13	12.7243	3e-06	downregulated	33	11.1551	1.4e-05	downregulated	30	11.0654	1.6e-05
positive regulation of dendrite development	GO	5 out of 7	28.4324	upregulated	5	0.74784	0.4734	upregulated	4	1.54365	0.2136	downregulated	6	5.22847	0.0054	upregulated	4	6.66434	0.0013	upregulated	10	5.12602	0.0059	downregulated	18	15.863	1.3e-07	downregulated	16	13.968	8.6e-07
macroautophagy	GO	5 out of 7	28.3134	upregulated	4	0.372246	0.6892	upregulated	8	1.51717	0.2193	downregulated	12	3.34046	0.0354	downregulated	6	1.53252	0.216	downregulated	24	12.8252	2.7e-06	downregulated	26	7.49077	0.0006	downregulated	28	10.981	1.7e-05
regulation of neuron death	GO	5 out of 7	28.1711	upregulated	13	2.44819	0.0865	upregulated	5	3.06306	0.0467	downregulated	18	4.02387	0.0179	downregulated	10	2.57126	0.0764	downregulated	24	2.99623	0.05	downregulated	43	12.7517	2.9e-06	downregulated	44	13.507	1.4e-06
negative regulation of cation channel activity	GO	7 out of 7	27.9694	upregulated	4	4.19587	0.0151	upregulated	1	2.48404	0.0834	upregulated	2	1.29943	0.2727	upregulated	1	1.66745	0.1887	downregulated	5	6.94006	0.001	downregulated	6	6.32916	0.0018	downregulated	6	5.05337	0.0064
positive regulation of secretion	GO	4 out of 7	27.9367	downregulated	7	1.09213	0.3355	upregulated	17	4.2738	0.0139	downregulated	24	6.36961	0.0017	downregulated	19	12.2123	5e-06	downregulated	33	11.2369	1.3e-05	downregulated	59	14.6194	4.5e-07	downregulated	57	17.4806	2.6e-08
sarcoplasm	GO	6 out of 7	27.8999	upregulated	3	2.35293	0.0951	downregulated	1	2.63407	0.0718	upregulated	5	2.66585	0.0695	upregulated	1	2.41741	0.0892	downregulated	6	3.69257	0.0249	downregulated	15	12.2112	5e-06	downregulated	13	7.19404	0.0008
telencephalon development	GO	5 out of 7	27.7423	upregulated	7	0.783143	0.457	upregulated	8	4.63975	0.0097	upregulated	13	7.02668	0.0009	downregulated	11	3.71597	0.0243	downregulated	26	7.75614	0.0004	downregulated	42	7.53656	0.0005	upregulated	21	7.63205	0.0005
cytoskeletal adaptor activity	GO	5 out of 7	27.4882					upregulated	2	2.95168	0.0523	upregulated	2	2.97218	0.0512	upregulated	1	4.14385	0.0159	downregulated	2	3.47348	0.031	downregulated	4	6.99962	0.0009	downregulated	6	10.4209	3e-05
reproductive behavior	GO	6 out of 7	27.1865					upregulated	1	0.89811	0.4073	upregulated	3	3.86923	0.0209	upregulated	2	4.58858	0.0102	downregulated	1	5.82116	0.003	downregulated	7	6.35084	0.0017	downregulated	4	5.65856	0.0035
pigment biosynthetic process	GO	7 out of 7	27.0482	upregulated	3	1.24954	0.2866	upregulated	6	6.74318	0.0012	upregulated	6	5.90334	0.0027	upregulated	2	3.34255	0.0353	downregulated	4	1.51745	0.2193	downregulated	9	5.47243	0.0042	downregulated	7	2.81974	0.0596
protein secretion	GO	5 out of 7	26.9967	upregulated	5	2.26242	0.1041	upregulated	2	1.76152	0.1718	upregulated	5	1.84971	0.1573	downregulated	7	3.53052	0.0293	downregulated	13	6.97014	0.0009	downregulated	23	11.5601	9.5e-06	downregulated	18	7.97298	0.0003
mitochondrial transmembrane transport	GO	4 out of 7	26.9368	upregulated	2	0.45452	0.6348	downregulated	2	1.30171	0.2721	downregulated	2	0.687201	0.503	downregulated	1	0.739342	0.4774	downregulated	8	5.95955	0.0026	downregulated	20	12.7382	2.9e-06	downregulated	15	10.5128	2.7e-05
outer membrane	GO	4 out of 7	26.8185	downregulated	4	0.869971	0.419	upregulated	9	2.92429	0.0537	downregulated	16	7.99076	0.0003	downregulated	10	4.35028	0.0129	downregulated	20	8.1017	0.0003	downregulated	44	15.3569	2.1e-07	downregulated	35	13.6467	1.2e-06
regulation of cellular protein localization	GO	5 out of 7	26.8174	upregulated	23	0.949873	0.3868	downregulated	11	3.51863	0.0296	upregulated	14	1.95829	0.1411	downregulated	21	2.26277	0.1041	downregulated	46	4.13248	0.016	downregulated	81	12.7901	2.8e-06	downregulated	69	12.7681	2.9e-06
regulation of release of sequestered calcium ion into cytosol	GO	3 out of 7	26.7843	downregulated	2	1.32588	0.2656	downregulated	1	2.70311	0.067	downregulated	4	1.99785	0.1356	downregulated	2	0.925877	0.3962	downregulated	9	6.90469	0.001	downregulated	18	14.747	3.9e-07	downregulated	15	12.0854	5.6e-06
regulation of sodium ion transmembrane transporter activity	GO	5 out of 7	26.6325	upregulated	5	4.51295	0.011	downregulated	2	2.07439	0.1256	upregulated	1	1.4974	0.2237	downregulated	1	0.2751	0.7595	downregulated	4	3.12761	0.0438	downregulated	12	10.6567	2.4e-05	downregulated	12	9.18732	0.0001
regulation of heart rate by cardiac conduction	GO	6 out of 7	26.5528	upregulated	3	4.18128	0.0153	upregulated	3	3.54432	0.0289	upregulated	2	1.34349	0.2609	downregulated	1	1.64128	0.1937	downregulated	4	5.41162	0.0045	downregulated	9	8.99807	0.0001	downregulated	5	4.71531	0.009
membrane depolarization during cardiac muscle cell action potential	GO	5 out of 7	26.3896	upregulated	3	5.90407	0.0027	downregulated	1	1.58958	0.204	upregulated	2	2.31252	0.099					downregulated	1	2.47722	0.084	downregulated	7	10.3854	3.1e-05	downregulated	4	6.89998	0.001
cardiac muscle cell contraction	GO	5 out of 7	26.3867	upregulated	4	8.20101	0.0003	downregulated	3	6.08	0.0023	upregulated	2	1.30093	0.2723	downregulated	1	1.614	0.1991	downregulated	4	7.00836	0.0009	downregulated	10	10.7228	2.2e-05	downregulated	7	6.84753	0.0011
proton-transporting V-type ATPase complex	GO	4 out of 7	26.3582	upregulated	1	0.394074	0.6743									downregulated	1	0.667563	0.513	downregulated	2	1.60151	0.2016	downregulated	8	13.5023	1.4e-06	downregulated	8	11.5278	9.9e-06
channel inhibitor activity	GO	5 out of 7	26.1784	upregulated	4	2.97366	0.0511	upregulated	3	5.44871	0.0043	downregulated	3	0.665527	0.514	downregulated	1	0.44446	0.6412	downregulated	4	2.28749	0.1015	downregulated	10	9.81695	5.5e-05	downregulated	8	6.76152	0.0012
organelle outer membrane	GO	4 out of 7	25.9834	downregulated	4	0.886853	0.4119	upregulated	8	2.93377	0.0532	downregulated	16	8.0619	0.0003	downregulated	10	4.41283	0.0121	downregulated	20	8.40664	0.0002	downregulated	43	15.145	2.6e-07	downregulated	34	12.8596	2.6e-06
regulation of voltage-gated calcium channel activity	GO	6 out of 7	25.9265	upregulated	5	10.5141	2.7e-05	downregulated	1	2.87067	0.0567	upregulated	4	4.26087	0.0141	upregulated	1	1.75748	0.1725	downregulated	5	4.88812	0.0075	downregulated	7	4.26815	0.014	downregulated	6	3.10846	0.0447
carbon-carbon lyase activity	GO	5 out of 7	25.6504	downregulated	2	5.39573	0.0045	upregulated	5	4.54442	0.0106	upregulated	6	8.10814	0.0003	upregulated	3	8.03238	0.0003	downregulated	7	6.43396	0.0016	downregulated	8	3.64986	0.026	downregulated	8	3.92719	0.0197
response to pain	GO	4 out of 7	25.6461					upregulated	1	3.11637	0.0443	downregulated	3	0.930392	0.3944	downregulated	2	1.9185	0.1468	downregulated	3	9.49475	7.5e-05	downregulated	6	10.7727	2.1e-05	downregulated	4	5.11119	0.006
GTP-dependent protein binding	GO	4 out of 7	25.5563	upregulated	1	3.98333	0.0186	downregulated	1	4.526	0.0108	downregulated	2	0.99144	0.371					downregulated	4	5.94601	0.0026	downregulated	5	10.6464	2.4e-05	downregulated	7	10.498	2.8e-05
ciliary basal body-plasma membrane docking	GO	5 out of 7	25.4728	upregulated	12	7.3842	0.0006	upregulated	8	6.94068	0.001	downregulated	11	3.82358	0.0218	downregulated	4	2.34038	0.0963	downregulated	14	5.71567	0.0033	downregulated	19	5.72716	0.0033	downregulated	14	5.86907	0.0028
establishment of protein localization to plasma membrane	GO	5 out of 7	25.4719	upregulated	4	1.65083	0.1919	downregulated	3	3.11349	0.0444	upregulated	1	1.70975	0.1809	downregulated	2	1.76632	0.171	downregulated	3	2.71738	0.066	downregulated	10	11.1183	1.5e-05	downregulated	11	13.1555	1.9e-06
9+2 motile cilium	GO	7 out of 7	25.4354	upregulated	5	2.5572	0.0775	upregulated	4	1.84541	0.158	upregulated	3	2.14445	0.1171	upregulated	1	2.53783	0.079	downregulated	13	10.2776	3.4e-05	downregulated	12	3.75153	0.0235	downregulated	9	2.32139	0.0981
cardiac muscle cell action potential involved in contraction	GO	5 out of 7	25.4241	upregulated	4	8.41364	0.0002	downregulated	3	6.18725	0.0021	upregulated	2	1.4503	0.2345	downregulated	1	1.70873	0.1811	downregulated	4	7.40357	0.0006	downregulated	9	8.99807	0.0001	downregulated	6	7.05449	0.0009
negative regulation of secretion by cell	GO	4 out of 7	25.42	downregulated	4	0.468024	0.6262	upregulated	6	9.49402	7.5e-05	downregulated	10	1.61597	0.1987	downregulated	8	3.30397	0.0367	downregulated	16	6.23034	0.002	downregulated	23	9.63199	6.6e-05	downregulated	20	5.45162	0.0043
retrograde transport, endosome to plasma membrane	GO	6 out of 7	25.3993	upregulated	3	4.46077	0.0116	downregulated	2	3.2497	0.0388	upregulated	1	2.57685	0.076	upregulated	1	1.8279	0.1608	downregulated	2	3.79342	0.0225	downregulated	6	7.28222	0.0007	downregulated	5	8.70782	0.0002
negative regulation of response to drug	GO	5 out of 7	25.3147	upregulated	3	2.22185	0.1084	upregulated	2	4.4119	0.0121	downregulated	5	4.96776	0.007	downregulated	1	2.13228	0.1186	downregulated	7	10.7568	2.1e-05	downregulated	6	8.3102	0.0002	downregulated	4	6.71401	0.0012
cardiac muscle contraction	GO	6 out of 7	24.9724	upregulated	5	5.68136	0.0034	downregulated	4	6.13054	0.0022	upregulated	4	1.77354	0.1697	upregulated	2	3.26048	0.0384	downregulated	4	4.76189	0.0085	downregulated	12	9.03271	0.0001	downregulated	8	6.59301	0.0014
cytoplasmic region	GO	4 out of 7	24.8721	upregulated	32	4.51318	0.011	downregulated	9	2.8379	0.0585	downregulated	41	8.44985	0.0002	downregulated	26	7.46123	0.0006	downregulated	51	11.1123	1.5e-05	downregulated	81	13.3445	1.6e-06	downregulated	72	14.6511	4.3e-07
cardiac muscle cell action potential	GO	4 out of 7	24.8516	upregulated	4	7.51372	0.0005	downregulated	3	5.70272	0.0033	downregulated	1	1.06181	0.3458	downregulated	1	1.44557	0.2356	downregulated	4	6.30453	0.0018	downregulated	11	10.7939	2.1e-05	downregulated	7	8.44955	0.0002
regulation of regulated secretory pathway	GO	5 out of 7	24.8311	upregulated	4	0.395931	0.6731	upregulated	4	1.71091	0.1807	downregulated	12	9.92653	4.9e-05	downregulated	10	15.143	2.7e-07	downregulated	12	6.35164	0.0017	downregulated	29	26.5728	2.9e-12	downregulated	26	14.8693	3.5e-07
neurotransmitter metabolic process	GO	4 out of 7	24.642	downregulated	3	4.0988	0.0166	upregulated	3	0.442767	0.6423	upregulated	6	4.20753	0.0149	downregulated	5	5.22666	0.0054	downregulated	9	12.6293	3.3e-06	downregulated	9	11.0293	1.6e-05	downregulated	9	9.86607	5.2e-05
cell-cell adhesion	GO	5 out of 7	24.5032	upregulated	17	6.62145	0.0013	upregulated	13	4.48835	0.0112	downregulated	37	19.3749	3.9e-09	downregulated	19	10.4808	2.8e-05	downregulated	27	14.0347	8e-07	downregulated	58	11.7929	7.6e-06	downregulated	49	17.4215	2.7e-08
heart contraction	GO	6 out of 7	24.4926	upregulated	6	5.19365	0.0056	downregulated	5	7.89825	0.0004	upregulated	4	1.4987	0.2234	upregulated	2	3.05201	0.0473	downregulated	5	4.36926	0.0127	downregulated	13	9.73614	5.9e-05	downregulated	9	8.5411	0.0002
regulation of cyclase activity	GO	7 out of 7	24.4671	upregulated	3	1.41753	0.2423	upregulated	2	5.80213	0.003	upregulated	4	4.04265	0.0176	upregulated	2	3.73906	0.0238	downregulated	3	0.777122	0.4597	downregulated	9	5.67055	0.0034	downregulated	5	3.01808	0.0489
neurotransmitter transport	GO	3 out of 7	24.2857	upregulated	13	10.0457	4.3e-05	upregulated	2	0.874164	0.4172	downregulated	10	6.3983	0.0017	downregulated	7	5.67889	0.0034	downregulated	25	25.4431	8.9e-12	downregulated	56	57.5433	1e-25	downregulated	50	50.8406	8.3e-23
positive regulation of protein localization to membrane	GO	5 out of 7	24.2422	upregulated	9	2.46517	0.085	upregulated	5	1.9531	0.1418	downregulated	8	2.29025	0.1012	downregulated	6	2.96586	0.0515	downregulated	10	2.91849	0.054	downregulated	20	10.904	1.8e-05	downregulated	21	11.2575	1.3e-05
regulation of long-term synaptic potentiation	GO	5 out of 7	24.2158	upregulated	2	5.60421	0.0037	upregulated	2	3.14883	0.0429	upregulated	1	2.06631	0.1267					upregulated	4	4.07395	0.017	downregulated	7	7.64224	0.0005	downregulated	6	5.75419	0.0032
protein localization to postsynaptic membrane	GO	5 out of 7	24.1367	upregulated	3	3.44928	0.0318	downregulated	2	3.61946	0.0268	upregulated	1	3.08419	0.0458					downregulated	1	1.82144	0.1618	downregulated	6	9.2709	9.4e-05	downregulated	6	10.1304	4e-05
carbohydrate biosynthetic process	GO	4 out of 7	23.9717	downregulated	1	4.63381	0.0097	downregulated	3	1.23546	0.2907	upregulated	6	3.84356	0.0214	downregulated	7	3.57714	0.028	downregulated	14	9.84441	5.3e-05	downregulated	21	8.38424	0.0002	downregulated	22	11.3459	1.2e-05
neurotransmitter secretion	GO	4 out of 7	23.8879	upregulated	9	8.54019	0.0002	upregulated	1	0.167673	0.8456	upregulated	5	2.92829	0.0535	downregulated	2	0.993192	0.3704	downregulated	14	13.2449	1.8e-06	downregulated	40	51.9055	2.9e-23	downregulated	35	44.375	5.3e-20
mitotic cell cycle phase transition	GO	4 out of 7	23.8767	upregulated	21	5.12675	0.0059	upregulated	26	20.5791	1.2e-09	downregulated	26	5.14984	0.0058	downregulated	18	5.88924	0.0028	downregulated	26	7.88308	0.0004	upregulated	18	2.87865	0.0562	downregulated	33	4.2055	0.0149
regulation of calcium ion transmembrane transporter activity	GO	6 out of 7	23.8669	upregulated	7	6.40708	0.0016	downregulated	2	4.70472	0.0091	upregulated	4	1.64067	0.1938	upregulated	1	0.989171	0.3719	downregulated	10	4.13705	0.016	downregulated	17	8.59902	0.0002	downregulated	14	6.79865	0.0011
grooming behavior	GO	6 out of 7	23.8579	upregulated	1	2.70349	0.067					upregulated	1	1.86574	0.1548	upregulated	1	3.01118	0.0492	downregulated	1	2.65106	0.0706	downregulated	3	7.28554	0.0007	downregulated	3	6.34093	0.0018
positive regulation of blood circulation	GO	6 out of 7	23.6933	upregulated	1	2.48568	0.0833	upregulated	2	4.49446	0.0112	upregulated	4	3.30537	0.0367	downregulated	4	2.24137	0.1063	downregulated	4	5.65683	0.0035	downregulated	8	5.2871	0.0051	downregulated	8	4.70526	0.009
ligase activity	GO	5 out of 7	23.6463	downregulated	5	1.87567	0.1533	upregulated	8	2.81901	0.0597	upregulated	9	5.09494	0.0061	downregulated	4	1.65159	0.1917	downregulated	14	5.81185	0.003	downregulated	27	5.0404	0.0065	downregulated	24	8.40738	0.0002
organelle fusion	GO	6 out of 7	23.4247	upregulated	8	2.27899	0.1024	upregulated	8	5.45541	0.0043	upregulated	1	0.63616	0.5293	downregulated	5	1.39801	0.2471	downregulated	10	5.01282	0.0067	downregulated	15	4.373	0.0126	downregulated	16	7.06635	0.0009
sperm flagellum	GO	7 out of 7	23.3951	upregulated	3	1.0456	0.3515	upregulated	4	1.9993	0.1354	upregulated	3	2.28091	0.1022	upregulated	1	2.59616	0.0746	downregulated	12	9.40482	8.2e-05	downregulated	11	3.40024	0.0334	downregulated	9	2.66804	0.0694
vesicle docking involved in exocytosis	GO	3 out of 7	23.2739	upregulated	4	8.44721	0.0002	upregulated	1	3.07039	0.0464	downregulated	2	0.269698	0.7636	downregulated	1	0.835979	0.4334	downregulated	9	12.862	2.6e-06	downregulated	16	18.6564	7.9e-09	downregulated	18	24.7919	1.7e-11
vasodilation	GO	6 out of 7	23.2533	upregulated	3	4.08024	0.0169	upregulated	2	3.21391	0.0402	upregulated	2	2.07139	0.126					downregulated	3	5.96067	0.0026	downregulated	4	4.67026	0.0094	downregulated	3	3.25686	0.0385
ribonucleoprotein complex assembly	GO	7 out of 7	23.2107	upregulated	8	1.1339	0.3218	upregulated	14	3.97372	0.0188	upregulated	9	2.18066	0.113	upregulated	2	0.581011	0.5593	downregulated	24	6.95944	0.0009	downregulated	34	5.45774	0.0043	downregulated	23	2.92422	0.0537
organic hydroxy compound metabolic process	GO	4 out of 7	22.9997	downregulated	9	3.36714	0.0345	upregulated	15	4.08788	0.0168	downregulated	31	11.2645	1.3e-05	downregulated	27	13.961	8.6e-07	downregulated	39	16.5276	6.6e-08	downregulated	56	13.3114	1.7e-06	downregulated	63	17.6653	2.1e-08
positive regulation of calcium ion transmembrane transport	GO	4 out of 7	22.9299	upregulated	6	7.53483	0.0005	downregulated	1	2.93401	0.0532	downregulated	4	4.25308	0.0142	downregulated	1	0.414743	0.6605	downregulated	10	7.93524	0.0004	downregulated	13	9.89538	5e-05	downregulated	10	5.16633	0.0057
multivesicular body assembly	GO	6 out of 7	22.8286	upregulated	2	1.58792	0.2044	upregulated	3	2.86336	0.0571	upregulated	1	0.906522	0.4039	downregulated	1	0.617687	0.5392	downregulated	5	4.10151	0.0165	downregulated	8	8.38052	0.0002	downregulated	7	5.60644	0.0037
vasoconstriction	GO	5 out of 7	22.808	upregulated	1	3.2221	0.0399	upregulated	2	6.15293	0.0021	downregulated	1	0.31995	0.7262					downregulated	1	1.33409	0.2634	downregulated	5	6.30153	0.0018	downregulated	5	6.11733	0.0022
regulation of action potential	GO	4 out of 7	22.7354	upregulated	5	6.56293	0.0014	downregulated	1	2.98092	0.0507	downregulated	5	2.10998	0.1212	downregulated	1	1.30755	0.2705	downregulated	7	5.98944	0.0025	downregulated	11	9.07683	0.0001	downregulated	10	7.50465	0.0006
myosin binding	GO	5 out of 7	22.5361	downregulated	3	6.2253	0.002	upregulated	1	0.172012	0.842	downregulated	9	4.47444	0.0114	upregulated	1	1.20345	0.3002	downregulated	9	9.46037	7.8e-05	downregulated	12	7.97278	0.0003	downregulated	12	8.20193	0.0003
filopodium	GO	4 out of 7	22.4113	downregulated	3	4.70016	0.0091	downregulated	2	2.86329	0.0571	downregulated	8	1.21231	0.2975	upregulated	1	3.08964	0.0455	downregulated	12	6.60911	0.0013	downregulated	20	10.5837	2.5e-05	downregulated	17	10.9046	1.8e-05
anion transmembrane transport	GO	5 out of 7	22.1923	upregulated	16	5.03261	0.0065	upregulated	7	0.966879	0.3803	upregulated	8	6.2706	0.0019	downregulated	17	6.12541	0.0022	downregulated	18	5.34188	0.0048	downregulated	40	5.79643	0.003	downregulated	40	5.87625	0.0028
positive regulation of voltage-gated calcium channel activity	GO	4 out of 7	22.1513	upregulated	4	12.0956	5.6e-06					upregulated	1	1.41794	0.2422					downregulated	3	4.48348	0.0113	downregulated	3	4.15432	0.0157	downregulated	2	1.55232	0.2118
neurotransmitter receptor transport to postsynaptic membrane	GO	4 out of 7	22.0875	upregulated	3	4.54044	0.0107	downregulated	2	4.3893	0.0124									downregulated	1	2.19831	0.111	downregulated	5	8.60657	0.0002	downregulated	5	11.1314	1.5e-05
phosphatase regulator activity	GO	5 out of 7	21.9729	upregulated	8	4.57581	0.0103	upregulated	5	4.13209	0.016	downregulated	5	1.18401	0.3061	downregulated	6	3.91193	0.02	downregulated	13	5.94088	0.0026	downregulated	17	9.4224	8.1e-05	downregulated	16	2.99763	0.0499
ovulation cycle	GO	6 out of 7	21.9327	upregulated	3	1.62692	0.1965	upregulated	2	2.15577	0.1158	upregulated	2	3.40016	0.0334	upregulated	1	3.65346	0.0259	downregulated	4	6.59547	0.0014	downregulated	7	3.72661	0.0241	downregulated	8	4.50096	0.0111
visual behavior	GO	4 out of 7	21.8769	upregulated	2	1.61449	0.199	downregulated	2	1.5878	0.2044	upregulated	3	7.18226	0.0008					upregulated	4	2.30334	0.0999	downregulated	12	9.72226	6e-05	downregulated	9	4.94567	0.0071
neurotransmitter binding	GO	6 out of 7	21.8368	upregulated	2	2.86204	0.0572	upregulated	2	2.20014	0.1108	upregulated	2	1.13844	0.3203	upregulated	1	1.56112	0.2099	downregulated	8	6.64795	0.0013	downregulated	8	4.30283	0.0135	downregulated	7	5.98629	0.0025
regulation of sodium ion transmembrane transport	GO	5 out of 7	21.835	upregulated	5	3.9374	0.0195	downregulated	2	1.8797	0.1526	upregulated	1	1.31562	0.2683	downregulated	1	0.189217	0.8276	downregulated	4	2.41453	0.0894	downregulated	12	8.67556	0.0002	downregulated	12	7.5608	0.0005
excitatory synapse assembly	GO	5 out of 7	21.7999	upregulated	2	4.17215	0.0154					upregulated	1	1.57698	0.2066	upregulated	1	3.49785	0.0303	upregulated	1	0.477052	0.6206	downregulated	4	7.10044	0.0008	downregulated	4	5.92953	0.0027
multivesicular body organization	GO	6 out of 7	21.7677	upregulated	2	1.4617	0.2318	upregulated	3	2.65823	0.0701	upregulated	1	0.841993	0.4309	downregulated	1	0.562108	0.57	downregulated	5	3.766	0.0231	downregulated	8	8.19092	0.0003	downregulated	7	5.41094	0.0045
ubiquitin conjugating enzyme activity	GO	6 out of 7	21.7667	upregulated	6	3.088	0.0456	upregulated	3	2.24593	0.1058	upregulated	2	1.40601	0.2451	downregulated	2	0.639568	0.5275	downregulated	4	0.783257	0.4569	downregulated	12	6.81492	0.0011	downregulated	11	8.06816	0.0003
regulation of blood pressure	GO	6 out of 7	21.7632	upregulated	3	3.03247	0.0482	upregulated	6	1.34807	0.2597	downregulated	8	3.10546	0.0448	upregulated	3	1.77235	0.1699	downregulated	14	7.25932	0.0007	downregulated	21	4.91202	0.0074	downregulated	16	3.43901	0.0321
regulation of protein localization to centrosome	GO	4 out of 7	21.7589					upregulated	1	3.46834	0.0312	downregulated	1	1.19508	0.3027					downregulated	4	8.07635	0.0003	downregulated	4	7.07107	0.0008	downregulated	4	4.33827	0.0131
nuclear membrane	GO	5 out of 7	21.7416	upregulated	18	1.96268	0.1405	upregulated	13	3.81862	0.022	downregulated	27	5.62857	0.0036	downregulated	15	5.64009	0.0036	downregulated	30	7.10164	0.0008	downregulated	44	8.73466	0.0002	downregulated	43	11.3927	1.1e-05
metaphase plate congression	GO	5 out of 7	21.6949	upregulated	5	3.65812	0.0258	upregulated	5	3.89	0.0204	downregulated	2	0.459301	0.6317	downregulated	1	0.261945	0.7696	downregulated	9	6.06203	0.0023	downregulated	9	3.71725	0.0243	downregulated	10	5.0887	0.0062
developmental pigmentation	GO	7 out of 7	21.49	upregulated	2	3.50095	0.0302	upregulated	2	2.61576	0.0731	upregulated	2	2.11602	0.1205	upregulated	1	1.51453	0.2199	downregulated	5	3.79975	0.0224	downregulated	8	5.54799	0.0039	downregulated	5	2.39502	0.0912
positive regulation of viral release from host cell	GO	6 out of 7	21.4646	upregulated	1	1.25966	0.2838	upregulated	3	5.24485	0.0053	upregulated	1	1.41871	0.242					downregulated	4	5.08843	0.0062	downregulated	5	5.26416	0.0052	downregulated	4	3.18879	0.0412
cell cycle phase transition	GO	4 out of 7	21.391	upregulated	21	4.73257	0.0088	upregulated	26	19.7784	2.6e-09	downregulated	27	5.24249	0.0053	downregulated	19	6.40972	0.0016	downregulated	26	7.33513	0.0007	upregulated	18	2.66553	0.0696	downregulated	33	3.86269	0.021
postsynaptic density organization	GO	5 out of 7	21.3209	upregulated	2	4.34383	0.013					upregulated	2	4.5912	0.0101	upregulated	2	6.00499	0.0025	upregulated	2	5.10252	0.0061	downregulated	4	6.33821	0.0018	downregulated	4	5.14515	0.0058
establishment of protein localization to postsynaptic membrane	GO	4 out of 7	21.2376	upregulated	3	4.42681	0.012	downregulated	2	4.31055	0.0134									downregulated	1	2.15988	0.1153	downregulated	5	8.1144	0.0003	downregulated	5	10.8471	1.9e-05
regulation of cell maturation	GO	4 out of 7	21.2174	downregulated	1	1.15344	0.3155	upregulated	1	3.79504	0.0225	downregulated	2	1.42573	0.2403					downregulated	4	6.48874	0.0015	downregulated	4	7.69874	0.0005	downregulated	4	5.81409	0.003
ribonucleoprotein complex binding	GO	7 out of 7	21.1875	upregulated	4	0.166067	0.847	upregulated	6	2.3094	0.0993	upregulated	8	5.30198	0.005	upregulated	2	2.47047	0.0845	downregulated	10	4.16914	0.0155	downregulated	17	4.01765	0.018	downregulated	15	2.75277	0.0638
cellular potassium ion transport	GO	5 out of 7	21.1384	upregulated	8	3.66833	0.0255	upregulated	2	4.52834	0.0108	downregulated	6	1.78784	0.1673	upregulated	3	3.65999	0.0257	upregulated	7	4.37598	0.0126	downregulated	20	8.86779	0.0001	downregulated	15	6.57778	0.0014
potassium ion transmembrane transport	GO	5 out of 7	21.1384	upregulated	8	3.66833	0.0255	upregulated	2	4.52834	0.0108	downregulated	6	1.78784	0.1673	upregulated	3	3.65999	0.0257	upregulated	7	4.37598	0.0126	downregulated	20	8.86779	0.0001	downregulated	15	6.57778	0.0014
negative regulation of secretion	GO	5 out of 7	21.0713	upregulated	7	0.732296	0.4808	upregulated	6	9.12706	0.0001	downregulated	14	4.1665	0.0155	downregulated	11	4.39237	0.0124	downregulated	16	4.82372	0.008	downregulated	26	9.39239	8.3e-05	downregulated	22	5.55468	0.0039
response to cold	GO	4 out of 7	21.0471	upregulated	1	2.45325	0.086					downregulated	3	1.21763	0.2959					downregulated	6	9.3342	8.8e-05	downregulated	5	4.87759	0.0076	downregulated	7	5.59971	0.0037
aging	GO	4 out of 7	20.8815	downregulated	5	3.74693	0.0236	upregulated	15	7.26999	0.0007	downregulated	22	6.65235	0.0013	downregulated	14	5.73301	0.0032	downregulated	22	9.32608	8.9e-05	downregulated	27	7.20853	0.0007	downregulated	26	6.55688	0.0014
spermatid differentiation	GO	7 out of 7	20.8676	upregulated	9	2.53056	0.0796	upregulated	6	1.76991	0.1703	upregulated	6	3.18245	0.0415	upregulated	4	2.90067	0.055	downregulated	13	3.85337	0.0212	downregulated	20	3.97405	0.0188	downregulated	18	2.65659	0.0702
negative regulation of calcium ion transmembrane transporter activity	GO	7 out of 7	20.7902	upregulated	2	1.60355	0.2012	upregulated	2	1.77467	0.1695	upregulated	2	1.56472	0.2091	upregulated	1	1.83496	0.1596	downregulated	4	5.0584	0.0064	downregulated	5	4.98293	0.0069	downregulated	4	3.97093	0.0189
membrane coat	GO	4 out of 7	20.7483	downregulated	3	1.74875	0.174	downregulated	3	1.20941	0.2984	downregulated	6	1.73587	0.1762	upregulated	2	1.94882	0.1424	downregulated	9	2.66395	0.0697	downregulated	25	13.0867	2.1e-06	downregulated	20	7.74284	0.0004
photoreceptor cell differentiation	GO	5 out of 7	20.7144	upregulated	2	3.76387	0.0232	upregulated	2	2.38266	0.0923	downregulated	4	1.80121	0.1651	downregulated	1	0.26332	0.7685	downregulated	5	5.36401	0.0047	downregulated	10	5.98016	0.0025	downregulated	8	5.28827	0.0051
response to light stimulus	GO	6 out of 7	20.6031	upregulated	9	0.64831	0.5229	upregulated	17	6.65788	0.0013	upregulated	7	4.64612	0.0096	downregulated	14	2.96401	0.0516	downregulated	17	3.66033	0.0257	downregulated	34	4.39436	0.0123	downregulated	30	3.56011	0.0284
electron transfer activity	GO	5 out of 7	20.4954	downregulated	2	3.06658	0.0466	upregulated	8	5.70725	0.0033	upregulated	5	4.90936	0.0074	downregulated	4	2.77969	0.0621	downregulated	7	2.33232	0.0971	downregulated	14	7.25205	0.0007	downregulated	12	3.361	0.0347
glycoprotein biosynthetic process	GO	6 out of 7	20.4737	upregulated	13	5.04663	0.0064	upregulated	19	8.14363	0.0003	upregulated	12	7.0121	0.0009	downregulated	13	5.20206	0.0055	downregulated	12	0.322517	0.7243	downregulated	27	2.28931	0.1013	downregulated	26	2.86156	0.0572
cell cycle G2/M phase transition	GO	5 out of 7	20.2923	upregulated	11	4.28665	0.0138	upregulated	10	7.30599	0.0007	downregulated	15	4.64393	0.0096	downregulated	8	4.0922	0.0167	downregulated	17	6.72486	0.0012	downregulated	24	4.97579	0.0069	downregulated	21	5.73512	0.0032
photoreceptor cell development	GO	5 out of 7	20.2194	upregulated	2	4.01839	0.018	downregulated	1	1.55904	0.2103	upregulated	1	0.479936	0.6188	downregulated	1	0.389486	0.6774	downregulated	4	5.62066	0.0036	downregulated	6	6.47626	0.0015	downregulated	6	5.57269	0.0038
neuron recognition	GO	4 out of 7	20.2014	upregulated	3	3.12445	0.044	downregulated	1	0.973977	0.3776	downregulated	2	3.07031	0.0464	downregulated	2	2.08523	0.1243	downregulated	3	5.6702	0.0034	downregulated	11	9.61583	6.7e-05	downregulated	10	7.92042	0.0004
vesicle cytoskeletal trafficking	GO	4 out of 7	20.1716	downregulated	2	3.08329	0.0458	upregulated	1	0.292535	0.7464	downregulated	3	1.6513	0.1918	downregulated	1	1.60629	0.2006	downregulated	3	2.00127	0.1352	downregulated	14	12.1969	5e-06	downregulated	14	12.0218	6e-06
regulation of cell morphogenesis	GO	3 out of 7	19.8759	downregulated	15	7.30153	0.0007	downregulated	6	1.44267	0.2363	downregulated	62	25.4796	8.6e-12	downregulated	36	16.2531	8.7e-08	downregulated	48	10.6071	2.5e-05	downregulated	92	29.7791	1.2e-13	downregulated	81	29.9665	9.7e-14
positive regulation of urine volume	GO	6 out of 7	19.8195					upregulated	1	4.09752	0.0166	upregulated	1	1.29928	0.2727	upregulated	1	2.8767	0.0563	downregulated	1	2.57971	0.0758	downregulated	2	5.18785	0.0056	downregulated	2	3.77839	0.0229
intercellular bridge	GO	6 out of 7	19.7931	upregulated	5	4.64193	0.0096	upregulated	3	3.66358	0.0256	downregulated	4	0.897706	0.4075	upregulated	1	1.69003	0.1845	downregulated	8	6.90912	0.001	downregulated	10	2.57593	0.0761	downregulated	7	1.21025	0.2981
midbrain development	GO	3 out of 7	19.7874	upregulated	2	0.970636	0.3788	downregulated	2	3.19151	0.0411	downregulated	9	4.7339	0.0088	downregulated	4	1.31143	0.2694	downregulated	11	7.47015	0.0006	downregulated	12	10.5359	2.7e-05	downregulated	13	11.0181	1.6e-05
protein phosphatase regulator activity	GO	5 out of 7	19.7709	upregulated	7	3.66187	0.0257	upregulated	3	1.56549	0.209	downregulated	4	1.08085	0.3393	downregulated	5	3.749	0.0235	downregulated	10	5.62164	0.0036	downregulated	15	9.58701	6.9e-05	downregulated	15	4.16469	0.0155
sarcolemma	GO	4 out of 7	19.7588	upregulated	5	1.31315	0.269	upregulated	5	5.19995	0.0055	downregulated	9	3.34113	0.0354	downregulated	4	2.36597	0.0939	upregulated	9	4.84275	0.0079	downregulated	22	13.8126	1e-06	downregulated	22	9.98299	4.6e-05
pigment cell differentiation	GO	5 out of 7	19.6884	upregulated	2	3.84553	0.0214	upregulated	2	3.48544	0.0306	downregulated	1	0.535548	0.5853					downregulated	3	3.20437	0.0406	downregulated	7	6.29182	0.0019	downregulated	4	3.3968	0.0335
carbon-nitrogen lyase activity	GO	5 out of 7	19.6598	upregulated	2	3.02976	0.0483	upregulated	1	2.84757	0.058	downregulated	1	0.543173	0.5809					downregulated	5	9.32422	8.9e-05	downregulated	3	2.02833	0.1316	downregulated	3	2.97313	0.0511
apical dendrite	GO	5 out of 7	19.6537	upregulated	1	1.58316	0.2053					downregulated	1	1.88353	0.1521	upregulated	1	4.31976	0.0133	downregulated	3	3.71746	0.0243	downregulated	4	5.14027	0.0059	downregulated	5	6.7766	0.0011
response to ethanol	GO	5 out of 7	19.5959	upregulated	1	0.399669	0.6705	upregulated	4	3.8518	0.0212	downregulated	8	5.15229	0.0058	downregulated	5	2.18168	0.1129	downregulated	14	8.91133	0.0001	downregulated	17	7.30742	0.0007	downregulated	19	6.45961	0.0016
sleep	GO	4 out of 7	19.5877	upregulated	1	3.98922	0.0185					upregulated	3	6.27902	0.0019									downregulated	3	3.63782	0.0263	downregulated	5	5.68167	0.0034
protein transmembrane import into intracellular organelle	GO	6 out of 7	19.5562	upregulated	1	0.737647	0.4782	upregulated	1	1.0139	0.3628	upregulated	1	1.27296	0.28					downregulated	5	5.56387	0.0038	downregulated	10	7.14254	0.0008	downregulated	6	3.8253	0.0218
regulation of blood vessel size	GO	4 out of 7	19.5319	upregulated	6	4.52182	0.0109	upregulated	6	3.93132	0.0196	upregulated	10	7.57943	0.0005	downregulated	6	3.42797	0.0325	downregulated	7	5.52428	0.004	downregulated	12	5.92771	0.0027	downregulated	12	5.92485	0.0027
regulation of G-protein coupled receptor protein signaling pathway	GO	4 out of 7	19.5107	downregulated	3	2.82665	0.0592	upregulated	3	2.91337	0.0543	downregulated	8	3.50704	0.03	downregulated	8	4.81278	0.0081	downregulated	14	8.7576	0.0002	downregulated	25	10.9535	1.7e-05	downregulated	21	8.03272	0.0003
angiotensin-activated signaling pathway	GO	4 out of 7	19.5056					upregulated	1	3.64125	0.0262									downregulated	1	5.70872	0.0033	downregulated	1	4.01162	0.0181	downregulated	1	6.14397	0.0021
negative regulation of establishment of protein localization	GO	4 out of 7	19.4991	upregulated	8	2.39406	0.0913	upregulated	4	3.12271	0.044	downregulated	3	0.523886	0.5922	downregulated	4	0.773452	0.4614	upregulated	15	4.04957	0.0174	downregulated	28	10.122	4e-05	downregulated	24	9.20723	0.0001
regulation of tube size	GO	4 out of 7	19.4948	upregulated	6	4.50891	0.011	upregulated	6	3.91725	0.0199	upregulated	10	7.56478	0.0005	downregulated	6	3.40432	0.0332	downregulated	7	5.49226	0.0041	downregulated	12	5.92771	0.0027	downregulated	12	5.92485	0.0027
pigment metabolic process	GO	6 out of 7	19.4794	upregulated	3	0.924938	0.3966	upregulated	6	5.60997	0.0037	upregulated	6	4.95184	0.0071	upregulated	2	2.9897	0.0503	upregulated	4	1.60774	0.2003	downregulated	10	4.28013	0.0138	downregulated	8	2.33054	0.0972
mannosylation	GO	6 out of 7	19.4737	upregulated	2	1.64356	0.1933	upregulated	2	2.38476	0.0921	upregulated	3	8.3758	0.0002					downregulated	4	2.98661	0.0505	downregulated	4	1.8107	0.1635	downregulated	4	2.27229	0.1031
canonical glycolysis	GO	3 out of 7	19.4597					downregulated	1	2.13072	0.1188					downregulated	1	0.965889	0.3806	downregulated	2	3.1627	0.0423	downregulated	9	9.41106	8.2e-05	downregulated	8	9.9825	4.6e-05
cerebellar cortex development	GO	5 out of 7	19.3922					upregulated	1	0.545706	0.5794	upregulated	1	1.38191	0.2511	downregulated	1	0.457863	0.6326	downregulated	7	6.20693	0.002	downregulated	8	5.59572	0.0037	downregulated	10	6.11984	0.0022
ciliary base	GO	5 out of 7	19.2578	upregulated	3	2.51867	0.0806	upregulated	2	4.11644	0.0163	downregulated	1	0.158041	0.8538	downregulated	1	0.606264	0.5454	downregulated	6	5.7765	0.0031	downregulated	6	3.10568	0.0448	downregulated	7	4.50483	0.0111
protein transmembrane transport	GO	5 out of 7	19.2438	upregulated	3	0.49346	0.6105	upregulated	2	0.937712	0.3915	downregulated	1	5.24638	0.0053					downregulated	6	4.60417	0.01	downregulated	16	10.6635	2.3e-05	downregulated	13	7.79133	0.0004
cardiac conduction	GO	5 out of 7	19.2346	upregulated	3	2.93975	0.0529	downregulated	2	3.21291	0.0402	upregulated	3	1.35653	0.2576	downregulated	1	1.14704	0.3176	downregulated	6	3.86337	0.021	downregulated	14	10.4433	2.9e-05	downregulated	6	4.99165	0.0068
developmental maturation	GO	4 out of 7	19.2301	downregulated	4	2.871	0.0566	upregulated	1	3.33756	0.0355	downregulated	21	5.38866	0.0046	downregulated	10	4.36686	0.0127	downregulated	18	10.8261	2e-05	downregulated	33	12.5256	3.6e-06	downregulated	26	5.16738	0.0057
extrinsic component of membrane	GO	5 out of 7	19.1609	upregulated	12	4.39457	0.0123	upregulated	5	4.30172	0.0135	downregulated	16	3.54892	0.0288	downregulated	20	6.05089	0.0024	downregulated	19	4.37844	0.0125	downregulated	41	10.4596	2.9e-05	downregulated	32	5.22639	0.0054
regulation of exosomal secretion	GO	5 out of 7	19.125	upregulated	1	1.18004	0.3073	upregulated	1	0.904103	0.4049					downregulated	1	1.38792	0.2496	downregulated	3	3.46449	0.0313	downregulated	6	8.81514	0.0001	downregulated	5	6.14915	0.0021
neurotransmitter receptor internalization	GO	3 out of 7	19.1151									downregulated	3	3.65064	0.026	downregulated	2	3.14934	0.0429	downregulated	3	3.10007	0.045	downregulated	4	11.2067	1.4e-05	downregulated	4	11.6083	9.1e-06
protein localization to cilium	GO	7 out of 7	19.0951	upregulated	4	1.98165	0.1378	upregulated	2	0.851141	0.4269	upregulated	3	2.78136	0.062	upregulated	1	1.40992	0.2442	downregulated	6	4.77017	0.0085	downregulated	6	3.38902	0.0337	downregulated	4	3.91179	0.02
aromatic amino acid family metabolic process	GO	5 out of 7	19.0418	downregulated	2	1.99074	0.1366	downregulated	1	0.882816	0.4136	upregulated	2	2.4522	0.0861	upregulated	1	1.63705	0.1946	downregulated	5	5.73834	0.0032	downregulated	2	6.39006	0.0017	downregulated	1	5.69774	0.0034
endoplasmic reticulum tubular network	GO	4 out of 7	19.0001	upregulated	5	6.34038	0.0018					downregulated	1	0.336778	0.7141	downregulated	2	1.35366	0.2583	downregulated	3	1.3117	0.2694	downregulated	6	5.46657	0.0042	downregulated	8	7.5719	0.0005
sensory perception of light stimulus	GO	6 out of 7	18.9741	upregulated	9	3.96252	0.019	upregulated	4	1.25245	0.2858	upregulated	7	2.15518	0.1159	downregulated	6	2.42118	0.0888	downregulated	11	4.30466	0.0135	downregulated	18	4.88233	0.0076	downregulated	15	4.83814	0.0079
carboxylic acid transport	GO	4 out of 7	18.9474	upregulated	11	3.4048	0.0332	upregulated	7	1.3178	0.2677	upregulated	10	7.81942	0.0004	downregulated	9	2.72607	0.0655	upregulated	20	3.38648	0.0338	downregulated	35	9.13141	0.0001	downregulated	33	6.80661	0.0011
organic acid transport	GO	4 out of 7	18.9474	upregulated	11	3.4048	0.0332	upregulated	7	1.3178	0.2677	upregulated	10	7.81942	0.0004	downregulated	9	2.72607	0.0655	upregulated	20	3.38648	0.0338	downregulated	35	9.13141	0.0001	downregulated	33	6.80661	0.0011
glycolytic process through glucose-6-phosphate	GO	3 out of 7	18.8859					downregulated	1	2.10047	0.1224					downregulated	1	0.940833	0.3903	downregulated	2	3.12432	0.044	downregulated	9	9.05948	0.0001	downregulated	8	9.74341	5.9e-05
glycolytic process through fructose-6-phosphate	GO	3 out of 7	18.8859					downregulated	1	2.10047	0.1224					downregulated	1	0.940833	0.3903	downregulated	2	3.12432	0.044	downregulated	9	9.05948	0.0001	downregulated	8	9.74341	5.9e-05
L-type voltage-gated calcium channel complex	GO	5 out of 7	18.8851	upregulated	3	8.34723	0.0002	downregulated	1	2.06234	0.1272	upregulated	2	3.22222	0.0399					downregulated	1	2.87045	0.0567	downregulated	4	4.42806	0.0119	downregulated	2	2.07951	0.125
oxidoreductase activity, acting on the aldehyde or oxo group of donors, NAD or NADP as acceptor	GO	6 out of 7	18.8759	upregulated	1	0.595596	0.5512	upregulated	1	0.650907	0.5216	upregulated	1	0.9022	0.4057					downregulated	6	4.18229	0.0153	downregulated	10	7.43384	0.0006	downregulated	7	5.1111	0.006
regulation of glutamate secretion	GO	4 out of 7	18.7176	upregulated	2	1.60561	0.2008					downregulated	1	2.83212	0.0589	upregulated	1	2.56047	0.0773	upregulated	2	4.13367	0.016	downregulated	6	13.2031	1.8e-06	downregulated	5	8.31423	0.0002
mitochondrion localization	GO	3 out of 7	18.6832	downregulated	3	4.46033	0.0116	downregulated	1	0.518979	0.5951	downregulated	3	0.411489	0.6627					downregulated	4	3.31252	0.0364	downregulated	13	11.8666	7e-06	downregulated	11	8.89479	0.0001
calcium-dependent cell-cell adhesion via plasma membrane cell adhesion molecules	GO	6 out of 7	18.6462	upregulated	4	4.13147	0.0161	upregulated	1	2.05927	0.1275	upregulated	2	4.30188	0.0135					downregulated	2	3.30451	0.0367	downregulated	5	2.41307	0.0895	downregulated	6	2.43596	0.0875
negative regulation of synapse organization	GO	5 out of 7	18.646	upregulated	3	2.45923	0.0855	upregulated	3	4.9929	0.0068	downregulated	2	1.89751	0.1499	downregulated	5	5.79561	0.003	downregulated	2	7.00354	0.0009	downregulated	6	5.07638	0.0062	downregulated	6	6.8071	0.0011
response to immobilization stress	GO	3 out of 7	18.6275																	downregulated	1	6.02582	0.0024	downregulated	2	6.64711	0.0013	downregulated	4	5.9546	0.0026
localization within membrane	GO	3 out of 7	18.6097	upregulated	8	2.80643	0.0604	downregulated	4	2.10399	0.122	downregulated	10	5.3106	0.0049	downregulated	7	6.19683	0.002	upregulated	10	3.14301	0.0432	downregulated	24	13.2957	1.7e-06	downregulated	20	19.2619	4.3e-09
ciliary basal body	GO	6 out of 7	18.5567	upregulated	12	5.57714	0.0038	downregulated	2	1.9001	0.1496	upregulated	4	1.91191	0.1478	upregulated	1	1.06667	0.3442	downregulated	13	4.06459	0.0172	downregulated	20	5.47853	0.0042	downregulated	14	2.358	0.0946
lamellipodium organization	GO	6 out of 7	18.5565	upregulated	2	2.59445	0.0747	upregulated	4	5.88241	0.0028	upregulated	2	4.03232	0.0177	downregulated	4	4.15292	0.0157	downregulated	6	3.80421	0.0223	downregulated	6	3.24938	0.0388	downregulated	6	3.14664	0.043
peptide hormone secretion	GO	6 out of 7	18.5522	upregulated	1	0.366602	0.6931					upregulated	3	2.60406	0.074	upregulated	1	1.41068	0.244	downregulated	3	1.98217	0.1378	downregulated	12	7.99121	0.0003	downregulated	5	4.19748	0.015
ganglion development	GO	4 out of 7	18.5072	upregulated	2	5.87019	0.0028													downregulated	1	3.71181	0.0244	downregulated	2	3.83482	0.0216	downregulated	2	5.09036	0.0062
mitochondrion organization	GO	4 out of 7	18.4856	downregulated	9	1.36513	0.2553	upregulated	13	1.95798	0.1411	upregulated	15	4.07223	0.017	upregulated	3	1.15322	0.3156	downregulated	38	11.3022	1.2e-05	downregulated	83	28.3372	4.9e-13	downregulated	71	30.8758	3.9e-14
nucleoside metabolic process	GO	6 out of 7	18.4629	upregulated	9	3.52378	0.0295	upregulated	6	1.94658	0.1428	downregulated	8	1.48048	0.2275	upregulated	2	1.30606	0.2709	downregulated	9	2.70446	0.0669	downregulated	18	5.2703	0.0051	downregulated	15	5.19219	0.0056
negative regulation of calcium ion transmembrane transport	GO	6 out of 7	18.4365	upregulated	2	1.42897	0.2396	upregulated	2	1.57652	0.2067	upregulated	2	1.37531	0.2528	upregulated	1	1.71624	0.1797	downregulated	5	5.88477	0.0028	downregulated	6	6.45473	0.0016	downregulated	5	4.68984	0.0092
calcium-dependent protein binding	GO	3 out of 7	18.4316	downregulated	1	0.709599	0.4918	downregulated	1	0.520566	0.5942	downregulated	5	2.80547	0.0605	downregulated	3	1.88824	0.1513	downregulated	6	2.52857	0.0798	downregulated	12	12.9147	2.5e-06	downregulated	9	8.91213	0.0001
nucleoside phosphate catabolic process	GO	5 out of 7	18.4216	upregulated	1	1.04845	0.3505	downregulated	2	0.84596	0.4291	downregulated	5	2.45465	0.0859	upregulated	2	1.17929	0.3075	downregulated	9	3.0029	0.0496	downregulated	21	7.08219	0.0008	downregulated	19	9.40936	8.2e-05
negative regulation of potassium ion transmembrane transport	GO	7 out of 7	18.3999	upregulated	1	0.813871	0.4431	upregulated	1	2.92803	0.0535	upregulated	1	1.2053	0.2996	upregulated	1	3.0751	0.0462	downregulated	2	4.03073	0.0178	downregulated	3	2.64133	0.0713	downregulated	3	3.70554	0.0246
adenohypophysis development	GO	4 out of 7	18.3405													upregulated	1	2.40584	0.0902	downregulated	2	5.90469	0.0027	downregulated	2	5.65909	0.0035	downregulated	2	4.37091	0.0126
endoplasmic reticulum tubular network organization	GO	4 out of 7	18.2465	upregulated	3	5.1678	0.0057					downregulated	2	2.20018	0.1108	downregulated	1	1.16423	0.3122	downregulated	2	1.7145	0.1801	downregulated	6	8.63243	0.0002	downregulated	4	6.0962	0.0023
positive regulation of protein depolymerization	GO	7 out of 7	18.1882	upregulated	1	1.13166	0.3225	upregulated	1	2.26145	0.1042	upregulated	2	2.24949	0.1055	upregulated	1	1.7117	0.1806	downregulated	3	4.03896	0.0176	downregulated	3	3.31529	0.0363	downregulated	3	3.47967	0.0308
protein localization to non-motile cilium	GO	6 out of 7	18.1778	upregulated	1	1.72586	0.178	upregulated	1	1.34072	0.2617	upregulated	1	1.46466	0.2312					downregulated	3	5.6233	0.0036	downregulated	3	3.67727	0.0253	downregulated	3	4.34597	0.013
regulation of tube diameter	GO	5 out of 7	18.1319	upregulated	5	2.99683	0.0499	upregulated	5	3.54271	0.0289	upregulated	9	6.17545	0.0021	downregulated	6	3.62581	0.0266	downregulated	6	3.97179	0.0188	downregulated	11	6.14615	0.0021	downregulated	11	5.07092	0.0063
regulation of blood vessel diameter	GO	5 out of 7	18.1319	upregulated	5	2.99683	0.0499	upregulated	5	3.54271	0.0289	upregulated	9	6.17545	0.0021	downregulated	6	3.62581	0.0266	downregulated	6	3.97179	0.0188	downregulated	11	6.14615	0.0021	downregulated	11	5.07092	0.0063
eye morphogenesis	GO	6 out of 7	18.0738	upregulated	9	7.2154	0.0007	upregulated	3	1.49502	0.2242	downregulated	13	5.22145	0.0054	upregulated	1	1.07474	0.3414	downregulated	10	4.34601	0.013	downregulated	16	4.92681	0.0072	downregulated	12	4.23728	0.0144
transaminase activity	GO	4 out of 7	18.07									upregulated	1	2.92732	0.0535					downregulated	2	3.45957	0.0314	downregulated	4	5.00166	0.0067	downregulated	5	6.68144	0.0013
regulation of supramolecular fiber organization	GO	5 out of 7	18.017	upregulated	22	5.79217	0.0031	upregulated	15	3.60864	0.0271	downregulated	31	6.60128	0.0014	downregulated	16	7.73376	0.0004	downregulated	30	5.0905	0.0062	downregulated	51	8.06514	0.0003	downregulated	46	9.79557	5.6e-05
cell projection membrane	GO	3 out of 7	17.9982	downregulated	11	4.98013	0.0069	downregulated	7	1.10533	0.3311	downregulated	31	6.54669	0.0014	downregulated	16	4.18763	0.0152	downregulated	31	11.9096	6.7e-06	downregulated	42	7.4702	0.0006	downregulated	35	8.89154	0.0001
neuropeptide receptor binding	GO	5 out of 7	17.9816	upregulated	1	3.8127	0.0221					upregulated	1	3.45643	0.0315					downregulated	1	3.15196	0.0428	downregulated	3	5.59602	0.0037	downregulated	2	1.96454	0.1402
organelle disassembly	GO	5 out of 7	17.9494	upregulated	2	0.594905	0.5516	upregulated	1	0.107565	0.898	downregulated	4	1.26691	0.2817	downregulated	4	1.82065	0.1619	downregulated	7	4.65916	0.0095	downregulated	12	5.94285	0.0026	downregulated	14	8.4656	0.0002
amine biosynthetic process	GO	5 out of 7	17.6509					upregulated	1	0.730734	0.4816	upregulated	2	3.21722	0.0401	downregulated	1	0.899554	0.4068	downregulated	3	5.32411	0.0049	downregulated	3	4.36073	0.0128	downregulated	2	4.91767	0.0073
negative regulation of blood pressure	GO	5 out of 7	17.6107					upregulated	3	1.77029	0.1703	upregulated	3	2.41051	0.0898	downregulated	4	2.48401	0.0834	downregulated	7	7.30091	0.0007	downregulated	6	5.14353	0.0058	downregulated	6	3.46948	0.0311
intraciliary transport involved in cilium assembly	GO	6 out of 7	17.6032	upregulated	1	1.84576	0.1579	upregulated	4	4.29401	0.0137	upregulated	2	4.11796	0.0163					downregulated	4	1.273	0.28	downregulated	9	2.71613	0.0661	downregulated	6	3.35637	0.0349
establishment of chromosome localization	GO	5 out of 7	17.5839	upregulated	5	2.293	0.101	upregulated	6	3.53638	0.0291	downregulated	3	1.27852	0.2784	downregulated	2	1.23617	0.2905	downregulated	10	4.56051	0.0105	downregulated	12	4.46193	0.0115	downregulated	13	5.24677	0.0053
cell-cell adhesion mediated by cadherin	GO	5 out of 7	17.5814	upregulated	2	3.35486	0.0349					upregulated	1	4.82471	0.008					downregulated	2	3.88435	0.0206	downregulated	3	2.22053	0.1086	downregulated	4	3.29692	0.037
clathrin-dependent endocytosis	GO	2 out of 7	17.5568	downregulated	1	2.01041	0.1339	downregulated	1	1.19915	0.3015	downregulated	2	4.33736	0.0131					upregulated	2	1.38956	0.2492	downregulated	13	17.4371	2.7e-08	downregulated	8	9.05622	0.0001
cellular lipid catabolic process	GO	4 out of 7	17.4888	downregulated	3	4.33484	0.0131	upregulated	13	7.94099	0.0004	upregulated	11	8.12444	0.0003	downregulated	8	2.24311	0.1061	downregulated	15	5.48524	0.0041	downregulated	23	4.25558	0.0142	upregulated	14	1.73954	0.1756
positive regulation of cell size	GO	5 out of 7	17.4859					upregulated	1	1.40701	0.2449	upregulated	1	1.35327	0.2584					downregulated	2	5.304	0.005	downregulated	2	4.57668	0.0103	downregulated	1	4.84488	0.0079
photoreceptor cell cilium	GO	5 out of 7	17.4601	upregulated	5	2.26633	0.1037	upregulated	4	1.12749	0.3238	downregulated	4	0.944994	0.3887	downregulated	1	0.25262	0.7768	downregulated	9	3.73789	0.0238	downregulated	15	6.28612	0.0019	downregulated	13	5.23992	0.0053
neurotransmitter receptor transport	GO	4 out of 7	17.4498	upregulated	3	2.73177	0.0651	downregulated	2	3.09205	0.0454	downregulated	2	3.00968	0.0493					downregulated	2	1.95984	0.1409	downregulated	7	9.63147	6.6e-05	downregulated	6	9.22844	9.8e-05
regulation of urine volume	GO	6 out of 7	17.4386					upregulated	1	3.69611	0.0248	upregulated	1	1.06783	0.3438	upregulated	1	2.60627	0.0738	downregulated	1	2.19352	0.1115	downregulated	2	4.7661	0.0085	downregulated	2	3.10879	0.0447
transferase activity, transferring hexosyl groups	GO	6 out of 7	17.3473	upregulated	6	3.22903	0.0396	upregulated	9	2.79401	0.0612	upregulated	9	5.83418	0.0029	downregulated	8	1.40262	0.246	downregulated	12	2.08187	0.1247	downregulated	16	2.69203	0.0677	downregulated	17	2.1188	0.1202
regulation of cytoplasmic translation	GO	6 out of 7	17.3219	upregulated	2	2.41613	0.0893	upregulated	2	1.30036	0.2724	upregulated	4	5.94498	0.0026	upregulated	1	3.85066	0.0213	upregulated	2	1.2672	0.2816	downregulated	4	2.71568	0.0662	downregulated	2	2.36129	0.0943
translation factor activity, RNA binding	GO	6 out of 7	17.2763	upregulated	3	0.153678	0.8575	upregulated	3	1.935	0.1444	upregulated	6	2.93399	0.0532	upregulated	1	2.69139	0.0678	downregulated	9	4.44218	0.0118	downregulated	17	5.12002	0.006	upregulated	7	1.9834	0.1376
9+0 non-motile cilium	GO	5 out of 7	17.2253	upregulated	5	2.24536	0.1059	upregulated	4	1.11977	0.3264	downregulated	4	0.930417	0.3944	downregulated	1	0.248565	0.7799	downregulated	9	3.68081	0.0252	downregulated	15	6.18834	0.0021	downregulated	13	5.16998	0.0057
response to nerve growth factor	GO	6 out of 7	17.1031	upregulated	1	0.221957	0.8009	upregulated	4	3.33784	0.0355	upregulated	3	2.73907	0.0646	upregulated	2	3.26968	0.038	downregulated	3	2.11941	0.1201	downregulated	10	5.41512	0.0044	upregulated	8	3.26147	0.0383
ciliary tip	GO	5 out of 7	17.0875					upregulated	4	3.8227	0.0219	upregulated	2	4.11796	0.0163					downregulated	4	1.273	0.28	downregulated	10	4.4899	0.0112	downregulated	5	3.38395	0.0339
endocrine process	GO	6 out of 7	17.0714	downregulated	3	2.37644	0.0929	upregulated	2	1.07841	0.3401	upregulated	3	2.19456	0.1114	upregulated	3	4.98277	0.0069	downregulated	2	3.91819	0.0199	downregulated	4	2.58392	0.0755	downregulated	3	4.68995	0.0092
L-alpha-amino acid transmembrane transport	GO	5 out of 7	17.0429	upregulated	2	2.31507	0.0988	upregulated	2	3.82459	0.0218	upregulated	3	6.23501	0.002	downregulated	4	2.90011	0.055	upregulated	5	2.44945	0.0863	downregulated	10	4.88583	0.0076	downregulated	9	5.13196	0.0059
protein serine/threonine phosphatase complex	GO	5 out of 7	17.0129	upregulated	7	4.50414	0.0111	upregulated	5	2.89814	0.0551	upregulated	1	0.277002	0.7581	downregulated	3	1.2217	0.2947	upregulated	6	2.58422	0.0755	downregulated	8	5.99159	0.0025	downregulated	13	7.14797	0.0008
mRNA 3'-UTR AU-rich region binding	GO	5 out of 7	16.9779	upregulated	3	5.53121	0.004	upregulated	1	1.80328	0.1648	upregulated	3	4.90724	0.0074	upregulated	1	4.21049	0.0148	downregulated	1	1.61171	0.1995	downregulated	3	4.0017	0.0183	upregulated	4	3.47602	0.0309
water homeostasis	GO	7 out of 7	16.9739	upregulated	2	0.569015	0.5661	upregulated	1	3.37537	0.0342	upregulated	1	3.53978	0.029	upregulated	1	0.943037	0.3894	downregulated	6	3.37162	0.0343	downregulated	7	2.40009	0.0907	downregulated	6	2.77501	0.0623
sensory perception of mechanical stimulus	GO	6 out of 7	16.9381	upregulated	9	3.47676	0.0309	upregulated	4	2.40727	0.0901	downregulated	12	6.23835	0.002	upregulated	1	1.95607	0.1414	downregulated	15	6.23887	0.002	downregulated	17	4.89342	0.0075	downregulated	12	4.20402	0.0149
PDZ domain binding	GO	6 out of 7	16.9297	upregulated	9	6.13813	0.0022	upregulated	2	2.42512	0.0885	upregulated	7	3.64808	0.026	upregulated	2	1.97262	0.1391	upregulated	12	2.00971	0.134	downregulated	12	2.15672	0.1157	downregulated	12	2.59875	0.0744
response to radiation	GO	5 out of 7	16.9075	upregulated	17	0.402282	0.6688	upregulated	31	13.3157	1.6e-06	upregulated	15	4.32759	0.0132	downregulated	21	4.37697	0.0126	upregulated	42	3.79132	0.0226	downregulated	46	3.85636	0.0211	downregulated	41	3.17384	0.0418
phosphatase inhibitor activity	GO	6 out of 7	16.8553	upregulated	3	3.27475	0.0378	upregulated	2	3.02942	0.0483	upregulated	1	1.66864	0.1885					downregulated	5	3.18436	0.0414	downregulated	5	3.23866	0.0392	downregulated	5	2.45946	0.0855
response to water	GO	4 out of 7	16.7717					downregulated	1	2.63044	0.072	upregulated	1	1.86574	0.1548	downregulated	2	3.58895	0.0276	downregulated	1	6.91928	0.001	downregulated	2	7.44945	0.0006	downregulated	2	6.75659	0.0012
vacuolar proton-transporting V-type ATPase complex	GO	2 out of 7	16.7583													downregulated	1	0.980334	0.3752	upregulated	1	0.56142	0.5704	downregulated	5	9.10819	0.0001	downregulated	5	9.19184	0.0001
regulation of glucose import in response to insulin stimulus	GO	4 out of 7	16.6818	upregulated	4	6.27718	0.0019	downregulated	1	0.948803	0.3872	upregulated	1	0.677477	0.5079					downregulated	4	4.48053	0.0113	downregulated	7	6.1954	0.002	downregulated	6	5.24516	0.0053
positive regulation of cell cycle G2/M phase transition	GO	5 out of 7	16.6649	upregulated	2	1.24734	0.2873	upregulated	2	1.31424	0.2687	downregulated	3	1.42368	0.2408					downregulated	5	5.47563	0.0042	downregulated	5	6.04758	0.0024	downregulated	5	4.00381	0.0182
oxygen binding	GO	3 out of 7	16.6609	downregulated	2	2.31158	0.0991					downregulated	1	4.68171	0.0093					downregulated	3	11.4284	1.1e-05	downregulated	1	6.45905	0.0016	downregulated	2	5.76668	0.0031
nucleotide catabolic process	GO	4 out of 7	16.6049	upregulated	1	1.09456	0.3347	downregulated	2	0.889058	0.411	downregulated	5	2.66595	0.0695	upregulated	2	1.25653	0.2846	downregulated	8	3.00829	0.0494	downregulated	21	7.81733	0.0004	downregulated	17	9.99147	4.6e-05
methylation	GO	6 out of 7	16.4802	upregulated	22	3.72058	0.0242	upregulated	24	10.5653	2.6e-05	upregulated	7	2.50254	0.0819	upregulated	3	6.0163	0.0024	upregulated	45	11.2232	1.3e-05	downregulated	34	3.27571	0.0378	downregulated	28	1.62292	0.1973
glycerolipid metabolic process	GO	3 out of 7	16.3945	downregulated	7	3.3094	0.0365	downregulated	6	0.928732	0.3951	downregulated	29	8.29226	0.0003	downregulated	17	3.60253	0.0273	downregulated	35	7.02563	0.0009	downregulated	62	11.8756	7e-06	downregulated	48	5.33393	0.0048
neuropeptide receptor activity	GO	5 out of 7	16.3593	upregulated	2	5.25447	0.0052					upregulated	2	2.01249	0.1337					downregulated	5	4.2535	0.0142	downregulated	3	2.77515	0.0623	downregulated	3	2.06367	0.127
cellular response to nerve growth factor stimulus	GO	6 out of 7	16.3572	upregulated	1	0.243817	0.7836	upregulated	3	2.38055	0.0925	upregulated	3	2.8946	0.0553	upregulated	2	3.3659	0.0345	downregulated	3	2.16924	0.1143	downregulated	9	5.30306	0.005	upregulated	8	3.56124	0.0284
phosphatidylinositol phosphate phosphatase activity	GO	5 out of 7	16.3007	upregulated	4	2.31942	0.0983	downregulated	1	0.783275	0.4569	downregulated	3	2.53292	0.0794	upregulated	1	2.72501	0.0655	downregulated	5	4.11352	0.0164	downregulated	10	7.06294	0.0009	downregulated	7	3.39604	0.0335
isomerase activity	GO	4 out of 7	16.2873	downregulated	2	2.23283	0.1072	upregulated	5	2.44386	0.0868	downregulated	6	1.69035	0.1845	downregulated	6	2.44307	0.0869	downregulated	14	9.99349	4.6e-05	downregulated	18	4.17292	0.0154	downregulated	16	4.3529	0.0129
nodal signaling pathway	GO	6 out of 7	16.2856	upregulated	3	7.42387	0.0006					upregulated	1	1.24646	0.2875	upregulated	1	3.27105	0.038	downregulated	1	0.499432	0.6069	downregulated	3	2.00271	0.135	downregulated	2	1.84206	0.1585
microtubule anchoring at microtubule organizing center	GO	6 out of 7	16.2758					upregulated	1	3.36469	0.0346	upregulated	1	1.13137	0.3226	upregulated	1	2.24876	0.1055	downregulated	2	3.20312	0.0406	downregulated	3	2.37023	0.0935	downregulated	3	3.95762	0.0191
calcium-mediated signaling using intracellular calcium source	GO	4 out of 7	16.2671					downregulated	1	4.48865	0.0112	upregulated	3	6.43621	0.0016					downregulated	5	7.22802	0.0007	downregulated	6	5.20282	0.0055	downregulated	3	1.88867	0.1513
positive regulation of exosomal secretion	GO	4 out of 7	16.1627					upregulated	1	1.09176	0.3356					downregulated	1	1.59724	0.2025	downregulated	2	3.64642	0.0261	downregulated	5	7.07928	0.0008	downregulated	4	5.94243	0.0026
positive regulation of regulated secretory pathway	GO	4 out of 7	16.1594	downregulated	1	0.54378	0.5805	upregulated	2	1.68469	0.1855	downregulated	5	5.97738	0.0025	downregulated	4	7.75316	0.0004	downregulated	4	4.05084	0.0174	downregulated	12	14.0041	8.3e-07	downregulated	12	10.6941	2.3e-05
cullin-RING ubiquitin ligase complex	GO	4 out of 7	16.1244	upregulated	19	10.8299	2e-05	upregulated	8	2.55874	0.0774	downregulated	9	0.744264	0.4751	downregulated	3	0.362861	0.6957	upregulated	21	4.63266	0.0097	downregulated	24	4.02815	0.0178	downregulated	25	4.4474	0.0117
isoprenoid biosynthetic process	GO	4 out of 7	16.0741					upregulated	2	4.39283	0.0124	downregulated	1	2.14353	0.1172	downregulated	2	3.63804	0.0263	downregulated	6	7.17184	0.0008	downregulated	6	4.59938	0.0101	downregulated	6	5.69164	0.0034
potassium channel regulator activity	GO	4 out of 7	16.0051	upregulated	6	7.64588	0.0005	downregulated	2	3.92708	0.0197	upregulated	1	1.96781	0.1398	downregulated	1	0.750077	0.4723	downregulated	6	4.03777	0.0176	upregulated	2	4.47313	0.0114	downregulated	9	7.03079	0.0009
peroxisome organization	GO	4 out of 7	15.8984	upregulated	3	0.492259	0.6112	upregulated	7	5.69656	0.0034	upregulated	4	5.49331	0.0041	downregulated	2	1.21297	0.2973	downregulated	10	5.42924	0.0044	upregulated	5	2.45272	0.0861	downregulated	10	1.66712	0.1888
atrial cardiac muscle cell action potential	GO	5 out of 7	15.8943	upregulated	1	2.71818	0.066					upregulated	1	1.12946	0.3232					downregulated	2	4.90552	0.0074	downregulated	3	4.69865	0.0091	downregulated	2	2.44253	0.0869
regulation of cAMP-dependent protein kinase activity	GO	4 out of 7	15.8101	upregulated	1	2.27072	0.1032													downregulated	1	2.71297	0.0663	downregulated	4	3.75272	0.0235	downregulated	5	7.07367	0.0008
mitochondrial inner membrane	GO	1 out of 7	15.7985	upregulated	27	5.62562	0.0036	upregulated	15	5.36053	0.0047	upregulated	10	1.51302	0.2202	upregulated	2	0.351718	0.7035	downregulated	41	15.7985	1.4e-07	downregulated	72	21.4388	4.9e-10	downregulated	70	25.7236	6.7e-12
chaperone-mediated protein transport	GO	5 out of 7	15.7458	upregulated	1	0.912338	0.4016	upregulated	1	1.12365	0.3251									downregulated	4	8.60342	0.0002	downregulated	4	3.39132	0.0337	downregulated	2	1.7151	0.1799
regulation of mRNA polyadenylation	GO	6 out of 7	15.6969	upregulated	1	1.24238	0.2887	upregulated	1	0.977616	0.3762	upregulated	3	5.9379	0.0026	upregulated	1	4.34315	0.013	upregulated	2	2.34027	0.0963	downregulated	4	2.70787	0.0667	downregulated	2	2.82828	0.0591
cullin family protein binding	GO	5 out of 7	15.5987	upregulated	2	1.35756	0.2573					upregulated	2	2.4694	0.0846					downregulated	1	0.707958	0.4926	downregulated	7	7.85957	0.0004	downregulated	4	3.20424	0.0406
transcription factor activity, RNA polymerase II core promoter sequence-specific binding involved in preinitiation complex assembly	GO	6 out of 7	15.5753	upregulated	2	2.1235	0.1196	upregulated	1	4.26175	0.0141					upregulated	1	5.52978	0.004	downregulated	2	2.69688	0.0674	downregulated	1	0.385449	0.6801	downregulated	1	0.577911	0.5611
ATP synthesis coupled proton transport	GO	2 out of 7	15.5605																	upregulated	1	0.606001	0.5455	downregulated	6	11.4617	1.1e-05	downregulated	3	4.70482	0.0091
regulation of protein depolymerization	GO	5 out of 7	15.542	downregulated	3	1.43857	0.2373	upregulated	7	2.948	0.0524	upregulated	6	2.65586	0.0702	downregulated	4	5.95584	0.0026	downregulated	10	4.10584	0.0165	downregulated	18	7.06671	0.0009	downregulated	15	6.15999	0.0021
regulation of potassium ion transmembrane transporter activity	GO	6 out of 7	15.5232	upregulated	4	1.56207	0.2097	downregulated	3	2.38855	0.0918	upregulated	3	2.40439	0.0903	upregulated	1	2.29269	0.101	downregulated	3	0.415244	0.6602	downregulated	11	6.93628	0.001	downregulated	8	4.30112	0.0136
cell cortex region	GO	5 out of 7	15.4809	upregulated	1	4.51823	0.0109	upregulated	1	0.614485	0.5409	downregulated	8	9.7303	5.9e-05	downregulated	5	4.33075	0.0132	downregulated	4	5.20873	0.0055	downregulated	10	8.84247	0.0001	downregulated	10	10.3581	3.2e-05
positive regulation of glucose import in response to insulin stimulus	GO	4 out of 7	15.4634	upregulated	4	7.22134	0.0007	downregulated	1	1.11492	0.3279	upregulated	1	0.826625	0.4375					downregulated	2	2.3931	0.0913	downregulated	6	6.13722	0.0022	upregulated	4	4.03826	0.0176
amino acid transport	GO	3 out of 7	15.3559	upregulated	6	6.26212	0.0019	upregulated	2	2.77772	0.0622	upregulated	5	8.49919	0.0002	downregulated	5	2.18313	0.1127	downregulated	10	2.69381	0.0676	downregulated	22	13.7098	1.1e-06	downregulated	19	8.861	0.0001
homophilic cell adhesion via plasma membrane adhesion molecules	GO	3 out of 7	15.3343	upregulated	8	4.46115	0.0115	downregulated	3	1.50298	0.2225	upregulated	5	3.08682	0.0456	downregulated	3	2.621	0.0727	downregulated	10	11.9103	6.7e-06	downregulated	23	10.2791	3.4e-05	downregulated	20	8.91245	0.0001
viral budding via host ESCRT complex	GO	6 out of 7	15.3073	upregulated	1	1.18004	0.3073	upregulated	2	2.36984	0.0935	upregulated	1	1.2624	0.283					downregulated	4	4.50294	0.0111	downregulated	5	4.12773	0.0161	downregulated	3	1.86432	0.155
ATP synthesis coupled electron transport	GO	6 out of 7	15.2673	upregulated	4	1.35502	0.2579	upregulated	3	1.4678	0.2304	upregulated	2	0.813859	0.4431					downregulated	5	2.34274	0.0961	downregulated	13	5.90194	0.0027	downregulated	7	3.38599	0.0338
growth factor activity	GO	6 out of 7	15.2278	upregulated	6	2.34758	0.0956	upregulated	9	5.39446	0.0045	upregulated	4	1.39348	0.2482	downregulated	4	2.13071	0.1188	downregulated	7	1.97628	0.1386	downregulated	10	3.80526	0.0223	downregulated	9	2.44146	0.087
regulation of protein targeting	GO	4 out of 7	15.2028	upregulated	7	4.22215	0.0147	downregulated	2	2.04984	0.1288	downregulated	5	2.16401	0.1149	downregulated	4	3.13056	0.0437	downregulated	12	6.40963	0.0016	downregulated	15	5.14853	0.0058	downregulated	15	6.76685	0.0012
cellular response to angiotensin	GO	4 out of 7	15.1926					upregulated	2	3.01281	0.0492	downregulated	2	0.802567	0.4482	downregulated	1	0.937453	0.3916	downregulated	2	4.96843	0.007	downregulated	2	3.41284	0.0329	downregulated	2	5.53851	0.0039
transferase activity, transferring glycosyl groups	GO	6 out of 7	15.0792	upregulated	9	3.63038	0.0265	upregulated	12	3.47763	0.0309	upregulated	9	4.42915	0.0119	downregulated	10	2.18566	0.1124	downregulated	17	1.33008	0.2645	downregulated	24	2.08015	0.1249	downregulated	22	2.31749	0.0985
inositol phosphate phosphatase activity	GO	5 out of 7	15.0487	upregulated	2	1.81646	0.1626	downregulated	1	1.0329	0.356	downregulated	2	2.19238	0.1117	upregulated	1	3.04307	0.0477	downregulated	2	1.7708	0.1702	downregulated	6	6.48103	0.0015	downregulated	5	5.16266	0.0057
tricarboxylic acid cycle enzyme complex	GO	5 out of 7	15.044	upregulated	1	0.892299	0.4097	upregulated	1	2.25153	0.1052									downregulated	4	4.96964	0.0069	downregulated	4	4.02238	0.0179	downregulated	2	2.90813	0.0546
RNA polymerase II intronic transcription regulatory region sequence-specific DNA binding	GO	6 out of 7	14.9847	upregulated	2	3.07353	0.0463	upregulated	2	3.73996	0.0238					upregulated	1	3.69858	0.0248	downregulated	1	1.69783	0.1831	downregulated	1	1.2869	0.2761	downregulated	1	1.48785	0.2259
multivesicular body sorting pathway	GO	6 out of 7	14.9097	upregulated	2	3.2247	0.0398	upregulated	3	1.98989	0.1367	upregulated	2	1.50967	0.221	downregulated	1	0.337941	0.7132	downregulated	4	1.92078	0.1465	downregulated	7	4.23522	0.0145	downregulated	6	2.36734	0.0937
positive regulation of viral life cycle	GO	5 out of 7	14.8385	upregulated	2	0.265434	0.7669	upregulated	5	4.3092	0.0134	downregulated	3	1.4157	0.2428	downregulated	1	1.29834	0.273	downregulated	8	3.33908	0.0355	downregulated	12	5.87302	0.0028	downregulated	11	3.76582	0.0231
neuromuscular junction	GO	4 out of 7	14.7168	upregulated	2	3.95803	0.0191	upregulated	2	1.28104	0.2777	downregulated	4	3.05824	0.047	downregulated	3	2.77146	0.0626	upregulated	6	6.11333	0.0022	downregulated	16	8.75519	0.0002	downregulated	13	6.55228	0.0014
sulfotransferase activity	GO	5 out of 7	14.6922	upregulated	2	2.29715	0.1005					upregulated	3	5.61906	0.0036	upregulated	1	1.25697	0.2845	upregulated	5	1.34791	0.2598	downregulated	5	4.43025	0.0119	downregulated	5	2.43669	0.0875
filamentous actin	GO	6 out of 7	14.6809	upregulated	1	1.39345	0.2482	upregulated	2	1.90862	0.1483	upregulated	1	1.75386	0.1731	upregulated	1	1.37801	0.2521	downregulated	5	5.16839	0.0057	downregulated	5	3.07856	0.046	upregulated	3	1.8184	0.1623
cyclase activity	GO	6 out of 7	14.6616	upregulated	2	6.0257	0.0024					upregulated	1	2.049	0.1289	upregulated	1	1.91913	0.1467	downregulated	1	1.12323	0.3252	downregulated	2	1.23008	0.2923	downregulated	2	2.31446	0.0988
fear response	GO	4 out of 7	14.6395	downregulated	2	1.41434	0.2431	downregulated	1	1.0759	0.341	upregulated	4	10.5277	2.7e-05					downregulated	1	0.717726	0.4879	downregulated	7	4.16438	0.0155	downregulated	5	1.72	0.1791
positive regulation of insulin secretion involved in cellular response to glucose stimulus	GO	5 out of 7	14.6034	upregulated	2	1.45849	0.2326					upregulated	1	0.751989	0.4714					downregulated	1	0.911073	0.4021	downregulated	6	5.541	0.0039	downregulated	5	5.94088	0.0026
cyclic purine nucleotide metabolic process	GO	5 out of 7	14.5412	upregulated	2	5.93689	0.0026					upregulated	2	2.67888	0.0686	upregulated	2	4.72203	0.0089	downregulated	1	1.21612	0.2964	upregulated	2	1.75093	0.1736	downregulated	1	1.73824	0.1758
phosphatidylinositol monophosphate phosphatase activity	GO	5 out of 7	14.5407	upregulated	1	0.668441	0.5125					downregulated	2	2.55084	0.078	upregulated	1	3.19648	0.0409	downregulated	4	5.4393	0.0043	downregulated	7	5.26737	0.0052	downregulated	4	2.51991	0.0805
vacuolar lumen	GO	1 out of 7	14.5033	upregulated	4	0.643432	0.5255	upregulated	8	2.71827	0.066	downregulated	23	12.5607	3.5e-06	downregulated	18	17.4534	2.6e-08	downregulated	20	14.5033	5e-07	downregulated	28	9.3115	9e-05	downregulated	21	6.09434	0.0023
phosphorus-oxygen lyase activity	GO	6 out of 7	14.4828	upregulated	2	6.11885	0.0022					upregulated	1	2.13224	0.1186	upregulated	1	2.00153	0.1351	downregulated	1	1.19652	0.3022	downregulated	1	1.21252	0.2974	downregulated	1	1.8211	0.1618
regulation of synaptic vesicle endocytosis	GO	4 out of 7	14.3779	upregulated	1	1.01977	0.3607													downregulated	3	4.53437	0.0107	downregulated	6	5.81939	0.003	downregulated	4	3.00434	0.0496
negative regulation of cellular protein localization	GO	4 out of 7	14.367	upregulated	7	2.1211	0.1199	downregulated	3	3.53273	0.0292	upregulated	3	3.35335	0.035	downregulated	4	1.38386	0.2506	upregulated	15	3.47682	0.0309	downregulated	25	7.98073	0.0003	downregulated	19	9.30522	9.1e-05
mitotic metaphase plate congression	GO	3 out of 7	14.3541	upregulated	4	3.07924	0.046	upregulated	5	4.72923	0.0088	downregulated	2	0.658793	0.5175	downregulated	1	0.363311	0.6954	downregulated	9	7.56773	0.0005	downregulated	8	4.43025	0.0119	downregulated	10	6.45882	0.0016
ciliary plasm	GO	5 out of 7	14.2758	upregulated	8	2.95357	0.0522	downregulated	1	0.102603	0.9025	downregulated	1	1.47992	0.2277	upregulated	2	1.57705	0.2066	downregulated	15	7.33231	0.0007	downregulated	16	2.33241	0.0971	downregulated	12	1.663	0.1896
acid-thiol ligase activity	GO	5 out of 7	14.1532	downregulated	3	4.49222	0.0112	upregulated	1	0.589359	0.5547	upregulated	4	5.89066	0.0028	downregulated	1	1.01673	0.3618	downregulated	3	3.73107	0.024	downregulated	6	4.90363	0.0074	downregulated	5	4.54739	0.0106
neurotransmitter receptor activity involved in regulation of postsynaptic membrane potential	GO	4 out of 7	14.112	upregulated	2	5.6122	0.0037									downregulated	1	1.07863	0.3401	downregulated	3	1.99125	0.1365	downregulated	4	2.71469	0.0662	downregulated	4	4.87247	0.0077
transmitter-gated ion channel activity involved in regulation of postsynaptic membrane potential	GO	4 out of 7	14.112	upregulated	2	5.6122	0.0037									downregulated	1	1.07863	0.3401	downregulated	3	1.99125	0.1365	downregulated	4	2.71469	0.0662	downregulated	4	4.87247	0.0077
regulation of clathrin-dependent endocytosis	GO	3 out of 7	14.0313	upregulated	4	4.7521	0.0086	downregulated	1	1.21565	0.2965	downregulated	2	2.14364	0.1172	downregulated	1	0.697952	0.4976	upregulated	1	0.0993467	0.9054	downregulated	7	5.24643	0.0053	downregulated	8	8.18938	0.0003
insemination	GO	5 out of 7	14.031	upregulated	1	1.91183	0.1478	upregulated	1	1.56547	0.209	upregulated	2	3.79799	0.0224	upregulated	1	2.97573	0.051	downregulated	1	3.78002	0.0228	downregulated	1	2.95798	0.0519	upregulated	1	2.3186	0.0984
regulation of glutamate receptor signaling pathway	GO	4 out of 7	13.945	upregulated	4	4.97401	0.0069	downregulated	3	2.91219	0.0544	upregulated	1	0.6126	0.5419	downregulated	1	0.229277	0.7951	upregulated	4	4.0365	0.0177	downregulated	9	8.6927	0.0002	downregulated	10	6.84367	0.0011
ER to Golgi vesicle-mediated transport	GO	3 out of 7	13.9294	downregulated	5	1.88174	0.1523	upregulated	10	1.57209	0.2076	downregulated	14	1.59868	0.2022	upregulated	1	1.17355	0.3093	downregulated	27	14.6641	4.3e-07	downregulated	45	16.0995	1e-07	downregulated	41	12.404	4.1e-06
positive regulation of calcium ion transmembrane transporter activity	GO	4 out of 7	13.8585	upregulated	5	8.38666	0.0002	downregulated	1	3.55172	0.0287	downregulated	2	2.35086	0.0953	downregulated	1	0.69787	0.4976	downregulated	6	4.97239	0.0069	downregulated	8	5.19793	0.0055	downregulated	5	1.90192	0.1493
regulation of ERAD pathway	GO	4 out of 7	13.8082	upregulated	5	4.8722	0.0077	upregulated	3	3.50628	0.03	downregulated	1	0.106642	0.8988	downregulated	1	0.543669	0.5806	upregulated	3	0.727978	0.4829	downregulated	6	2.25923	0.1044	downregulated	7	4.5488	0.0106
mitochondrial gene expression	GO	6 out of 7	13.8034	upregulated	11	4.06515	0.0172	upregulated	7	2.94399	0.0527	upregulated	6	2.15579	0.1158	downregulated	4	1.8924	0.1507	downregulated	10	2.75942	0.0633	downregulated	15	0.996622	0.3691	downregulated	18	2.7748	0.0624
cytoskeleton-dependent cytokinesis	GO	5 out of 7	13.7627	upregulated	4	1.44579	0.2356	upregulated	2	0.386726	0.6793	downregulated	8	4.62408	0.0098	downregulated	5	1.65868	0.1904	downregulated	13	11.1476	1.4e-05	downregulated	14	4.61139	0.0099	downregulated	14	2.45393	0.086
cellular response to drug	GO	5 out of 7	13.7175	downregulated	9	6.14537	0.0021	upregulated	15	6.29059	0.0019	upregulated	13	4.71689	0.0089	downregulated	21	5.69058	0.0034	downregulated	24	5.47199	0.0042	downregulated	32	4.11314	0.0164	downregulated	30	4.9608	0.007
cellular modified amino acid metabolic process	GO	3 out of 7	13.6408	downregulated	2	0.10756	0.898	upregulated	9	4.43891	0.0118	upregulated	4	5.43077	0.0044	downregulated	5	0.756416	0.4693	downregulated	13	4.63511	0.0097	downregulated	25	3.07443	0.0462	upregulated	16	4.09764	0.0166
establishment of tissue polarity	GO	4 out of 7	13.6137	upregulated	3	4.39979	0.0123	upregulated	2	2.68208	0.0684	upregulated	2	1.96807	0.1397					downregulated	3	4.56376	0.0104	downregulated	2	0.86997	0.419	downregulated	2	1.62376	0.1972
pallium development	GO	3 out of 7	13.5987	downregulated	2	0.500002	0.6065	upregulated	7	5.35066	0.0047	downregulated	11	3.54847	0.0288	downregulated	8	3.04886	0.0474	upregulated	17	5.39323	0.0045	downregulated	26	8.24935	0.0003	downregulated	22	7.09603	0.0008
regulation of cell cycle G2/M phase transition	GO	5 out of 7	13.5889	upregulated	14	3.57505	0.028	upregulated	14	8.38774	0.0002	downregulated	21	10.3029	3.4e-05	downregulated	10	3.57126	0.0281	downregulated	19	6.47252	0.0015	downregulated	26	5.94107	0.0026	downregulated	19	3.08673	0.0457
copulation	GO	6 out of 7	13.563	upregulated	1	1.73426	0.1765	upregulated	1	1.38366	0.2507	upregulated	2	3.43556	0.0322	upregulated	1	2.78708	0.0616	downregulated	2	3.58827	0.0276	downregulated	1	2.76942	0.0627	upregulated	1	2.13527	0.1182
response to amino acid starvation	GO	4 out of 7	13.5505	upregulated	4	3.73865	0.0238	upregulated	3	4.38953	0.0124	upregulated	3	3.04125	0.0478	downregulated	3	2.38168	0.0924	upregulated	8	5.33159	0.0048	downregulated	10	6.65406	0.0013	downregulated	10	6.48153	0.0015
regulation of autophagosome assembly	GO	5 out of 7	13.5377	upregulated	3	3.21536	0.0401	upregulated	3	3.07498	0.0462	downregulated	3	2.45923	0.0855	downregulated	4	4.614	0.0099	downregulated	7	4.81484	0.0081	downregulated	9	5.37825	0.0046	downregulated	8	4.12754	0.0161
multicellular organism growth	GO	5 out of 7	13.3188	downregulated	4	3.05441	0.0472	downregulated	2	3.06777	0.0465	upregulated	1	5.9431	0.0026	upregulated	1	1.41803	0.2422	downregulated	7	2.81061	0.0602	downregulated	15	4.68138	0.0093	downregulated	9	4.58783	0.0102
positive regulation of establishment of protein localization	GO	2 out of 7	13.2924	downregulated	10	1.00431	0.3663	upregulated	14	2.50234	0.0819	downregulated	28	2.29882	0.1004	downregulated	19	5.76786	0.0031	upregulated	34	5.05035	0.0064	downregulated	51	8.09775	0.0003	downregulated	51	14.2656	6.4e-07
magnesium ion transmembrane transport	GO	5 out of 7	13.2391	upregulated	4	8.07262	0.0003	upregulated	1	1.02771	0.3578	downregulated	2	1.97975	0.1381					downregulated	2	1.69032	0.1845	downregulated	3	1.00214	0.3671	downregulated	4	3.42606	0.0325
regulation of protein secretion	GO	4 out of 7	13.2339	downregulated	12	2.25698	0.1047	upregulated	11	2.35297	0.0951	upregulated	10	2.01992	0.1327	downregulated	19	8.91908	0.0001	downregulated	23	3.54842	0.0288	downregulated	50	8.85083	0.0001	downregulated	48	11.1862	1.4e-05
tethering complex	GO	5 out of 7	13.1569	upregulated	3	1.37028	0.254	downregulated	2	3.38401	0.0339	downregulated	4	1.01213	0.3634	upregulated	2	1.90853	0.1483	downregulated	5	2.86766	0.0568	downregulated	16	6.93376	0.001	downregulated	13	4.4728	0.0114
neurexin family protein binding	GO	6 out of 7	13.0963	upregulated	1	1.40707	0.2449	upregulated	1	4.32254	0.0133	upregulated	1	1.96962	0.1395					downregulated	1	2.12611	0.1193	downregulated	1	1.32875	0.2648	downregulated	2	1.94218	0.1434
oxidoreductase activity, acting on the CH-NH2 group of donors	GO	4 out of 7	13.0763					upregulated	2	3.58696	0.0277	upregulated	3	5.71697	0.0033					downregulated	2	1.21449	0.2969	downregulated	4	4.68228	0.0093	upregulated	1	2.1244	0.1195
photoreceptor cell maintenance	GO	5 out of 7	13.0378	upregulated	1	1.17608	0.3085	upregulated	2	2.51812	0.0806	downregulated	1	0.801393	0.4487	downregulated	1	2.09303	0.1233	downregulated	4	6.7362	0.0012	downregulated	4	2.95978	0.0518	downregulated	4	2.54202	0.0787
atrial cardiac muscle cell to AV node cell communication	GO	5 out of 7	12.9724	upregulated	1	2.66864	0.0693					upregulated	1	1.08774	0.337	downregulated	1	2.46594	0.0849	downregulated	2	4.80602	0.0082	downregulated	3	4.49925	0.0111	downregulated	2	2.37671	0.0929
neuropeptide binding	GO	4 out of 7	12.9456	upregulated	1	4.14601	0.0158					downregulated	1	0.434128	0.6478					downregulated	1	3.05705	0.047	downregulated	1	3.45276	0.0317	downregulated	2	2.72386	0.0656
positive regulation of cellular response to insulin stimulus	GO	4 out of 7	12.9029	upregulated	4	5.17716	0.0056	downregulated	1	0.758518	0.4684	upregulated	1	0.511846	0.5994					downregulated	3	3.40073	0.0333	downregulated	7	4.57168	0.0103	upregulated	4	2.66533	0.0696
CoA-ligase activity	GO	5 out of 7	12.8654	downregulated	3	4.92449	0.0073	upregulated	1	0.698759	0.4972	upregulated	4	6.49082	0.0015	downregulated	1	1.14797	0.3173	downregulated	3	4.2359	0.0145	downregulated	5	4.23107	0.0145	downregulated	4	3.2813	0.0376
cerebellar Purkinje cell layer development	GO	3 out of 7	12.8637									downregulated	3	2.66928	0.0693					downregulated	4	5.34464	0.0048	downregulated	5	4.83423	0.008	downregulated	4	5.35415	0.0047
response to carbohydrate	GO	4 out of 7	12.7911	downregulated	3	4.23207	0.0145	upregulated	7	3.73184	0.0239	downregulated	13	3.54748	0.0288	upregulated	4	4.75076	0.0086	downregulated	13	4.23207	0.0145	downregulated	20	6.02696	0.0024	downregulated	20	6.57983	0.0014
sperm capacitation	GO	6 out of 7	12.7786	upregulated	1	0.479303	0.6192					upregulated	1	2.09066	0.1236	upregulated	1	3.8895	0.0205	downregulated	3	2.81495	0.0599	downregulated	3	2.01886	0.1328	downregulated	2	1.48534	0.2264
fat cell differentiation	GO	4 out of 7	12.7691	upregulated	5	1.72042	0.179	downregulated	2	0.625455	0.535	downregulated	7	2.69877	0.0673	downregulated	4	2.17376	0.1137	downregulated	8	2.8031	0.0606	downregulated	14	7.94986	0.0004	downregulated	11	5.79365	0.003
regulation of vascular permeability	GO	5 out of 7	12.7327	upregulated	1	3.28643	0.0374	upregulated	1	0.546181	0.5792	upregulated	4	6.22483	0.002	upregulated	1	2.00878	0.1342	downregulated	3	2.08478	0.1243	upregulated	1	0.545286	0.5797	upregulated	2	0.872993	0.4177
inorganic cation import across plasma membrane	GO	5 out of 7	12.7137	upregulated	3	2.49402	0.0826					upregulated	2	0.853365	0.426	upregulated	2	4.55557	0.0105	upregulated	2	1.2852	0.2766	downregulated	6	2.86762	0.0568	downregulated	4	3.22832	0.0396
positive regulation of stem cell proliferation	GO	5 out of 7	12.7046	downregulated	3	3.07031	0.0464	upregulated	3	4.96259	0.007	upregulated	1	0.794101	0.452	upregulated	1	1.4557	0.2332	downregulated	3	5.78397	0.0031	downregulated	4	1.88369	0.152	upregulated	4	2.17547	0.1136
Wnt signalosome	GO	3 out of 7	12.666																	downregulated	2	3.08351	0.0458	downregulated	3	5.89382	0.0028	downregulated	3	3.6887	0.025
ciliary transition zone	GO	5 out of 7	12.5727	upregulated	8	4.22209	0.0147	downregulated	1	1.12728	0.3239	upregulated	2	0.637738	0.5285	upregulated	1	0.94213	0.3898	downregulated	9	7.43715	0.0006	upregulated	3	1.60082	0.2017	downregulated	5	0.460871	0.6307
dendrite extension	GO	4 out of 7	12.5659					upregulated	1	1.47968	0.2277	upregulated	1	2.01647	0.1331	upregulated	1	3.11189	0.0445	upregulated	1	0.634231	0.5303	downregulated	3	3.22233	0.0399	downregulated	4	5.38627	0.0046
acid-amino acid ligase activity	GO	4 out of 7	12.5183	downregulated	1	1.02771	0.3578	upregulated	1	1.95031	0.1422	upregulated	2	2.43532	0.0876					downregulated	3	5.30364	0.005	downregulated	5	3.85675	0.0211	downregulated	2	1.35832	0.2571
positive regulation by host of viral process	GO	4 out of 7	12.4556					upregulated	3	6.19866	0.002									downregulated	3	3.25445	0.0386	downregulated	2	1.93545	0.1444	downregulated	2	1.06707	0.344
vitamin biosynthetic process	GO	6 out of 7	12.3907	upregulated	1	0.909965	0.4025	upregulated	1	0.984474	0.3736	upregulated	1	1.60011	0.2019					downregulated	2	1.30043	0.2724	downregulated	3	3.86393	0.021	downregulated	3	3.73178	0.024
cell communication involved in cardiac conduction	GO	5 out of 7	12.3897	upregulated	2	2.13202	0.1186	downregulated	2	3.72928	0.024	upregulated	3	2.24959	0.1054	downregulated	1	1.52129	0.2184	downregulated	5	2.90408	0.0548	downregulated	9	6.90094	0.001	downregulated	3	3.45366	0.0316
postsynapse assembly	GO	4 out of 7	12.3084	upregulated	2	3.50215	0.0301					upregulated	2	3.37644	0.0342	upregulated	1	3.27342	0.0379	upregulated	3	1.34559	0.2604	downregulated	3	3.502	0.0301	downregulated	3	2.76579	0.0629
natural killer cell mediated cytotoxicity	GO	6 out of 7	12.215	downregulated	1	1.52317	0.218	upregulated	1	0.748639	0.473	upregulated	1	0.727874	0.4829	upregulated	1	2.61757	0.073	downregulated	3	2.67619	0.0688	downregulated	3	2.80448	0.0605	downregulated	3	4.16342	0.0156
positive regulation of organelle assembly	GO	5 out of 7	12.2115	upregulated	3	2.39988	0.0907	upregulated	5	1.78004	0.1686	downregulated	6	1.81416	0.163	downregulated	6	3.47972	0.0308	downregulated	8	4.73082	0.0088	downregulated	12	4.6614	0.0095	downregulated	10	3.93322	0.0196
positive regulation of cation channel activity	GO	4 out of 7	12.2103	upregulated	4	5.48135	0.0042					downregulated	2	1.78642	0.1676	downregulated	2	3.55951	0.0285	downregulated	10	5.85107	0.0029	downregulated	10	3.2619	0.0383	downregulated	9	2.9619	0.0517
acetylcholine binding	GO	3 out of 7	12.1697																	downregulated	3	4.53537	0.0107	downregulated	2	2.89157	0.0555	downregulated	3	4.74272	0.0087
carbohydrate metabolic process	GO	1 out of 7	12.153	downregulated	6	3.35987	0.0347	upregulated	21	4.65	0.0096	upregulated	16	4.67798	0.0093	downregulated	18	2.64967	0.0707	downregulated	44	12.153	5.3e-06	downregulated	62	11.2239	1.3e-05	downregulated	51	10.1664	3.8e-05
organelle inheritance	GO	4 out of 7	12.1466					upregulated	1	1.25154	0.2861									downregulated	1	0.86675	0.4203	downregulated	4	6.36253	0.0017	downregulated	2	3.66574	0.0256
structural constituent of cytoskeleton	GO	1 out of 7	12.0393	downregulated	1	0.907895	0.4034	upregulated	1	1.61721	0.1985	upregulated	2	1.66517	0.1892	upregulated	3	4.32265	0.0133	downregulated	14	12.0393	5.9e-06	downregulated	21	10.2576	3.5e-05	downregulated	20	14.3018	6.1e-07
microtubule	GO	1 out of 7	12.0133	upregulated	22	1.39693	0.2474	upregulated	13	1.44119	0.2366	downregulated	45	11.3016	1.2e-05	downregulated	27	6.95558	0.001	downregulated	45	12.0133	6.1e-06	downregulated	91	28.8838	2.9e-13	downregulated	70	20.2026	1.7e-09
sodium ion import across plasma membrane	GO	4 out of 7	12.0124									upregulated	1	1.73694	0.1761	upregulated	1	2.70527	0.0669					downregulated	2	3.54997	0.0287	downregulated	2	4.0202	0.0179
regulation of reactive oxygen species metabolic process	GO	4 out of 7	12.0009	downregulated	6	1.51552	0.2197	upregulated	8	6.2814	0.0019	downregulated	15	6.12621	0.0022	downregulated	13	7.101	0.0008	downregulated	14	6.85201	0.0011	downregulated	16	5.80021	0.003	downregulated	13	7.81002	0.0004
regulation of multicellular organism growth	GO	4 out of 7	11.9806	downregulated	4	2.20699	0.11	downregulated	1	0.399332	0.6708	upregulated	3	1.04486	0.3517					downregulated	7	5.51495	0.004	downregulated	10	5.10454	0.0061	downregulated	7	2.92254	0.0538
proton transmembrane transport	GO	5 out of 7	11.892	upregulated	6	2.0059	0.1345	upregulated	4	1.36635	0.255	upregulated	5	2.22488	0.1081	upregulated	2	1.63735	0.1945	downregulated	9	4.65748	0.0095	downregulated	31	18.866	6.4e-09	downregulated	22	13.5524	1.3e-06
negative regulation of reactive oxygen species biosynthetic process	GO	3 out of 7	11.8798	downregulated	2	2.40966	0.0898	upregulated	2	2.96104	0.0518	downregulated	2	1.27522	0.2794	downregulated	1	0.55688	0.573	downregulated	4	7.13449	0.0008	downregulated	1	6.02601	0.0024	downregulated	1	5.62114	0.0036
oxidoreductase complex	GO	4 out of 7	11.8189	upregulated	5	1.29046	0.2751	downregulated	2	1.98668	0.1372	downregulated	6	2.27157	0.1032	downregulated	3	3.00511	0.0495	downregulated	8	3.21852	0.04	downregulated	20	8.94569	0.0001	downregulated	13	5.62759	0.0036
regulation of GTP binding	GO	5 out of 7	11.8147	upregulated	4	5.06529	0.0063	upregulated	1	3.51381	0.0298	upregulated	1	1.04582	0.3514					upregulated	3	3.46518	0.0313	downregulated	4	2.34269	0.0961	downregulated	4	3.3123	0.0364
cellular response to leucine starvation	GO	4 out of 7	11.8126					upregulated	2	6.00025	0.0025	upregulated	1	2.49528	0.0825					upregulated	3	2.58153	0.0757	downregulated	1	0.9524	0.3858	downregulated	3	2.3647	0.094
platelet activation	GO	5 out of 7	11.7572	upregulated	5	1.40952	0.2443	upregulated	5	4.71635	0.0089	downregulated	11	4.28129	0.0138	downregulated	7	2.26965	0.1033	downregulated	7	1.87554	0.1533	downregulated	18	6.8942	0.001	downregulated	14	3.4125	0.033
response to alcohol	GO	4 out of 7	11.6603	downregulated	3	1.02307	0.3595	upregulated	6	3.28884	0.0373	downregulated	16	4.55192	0.0105	downregulated	12	5.31786	0.0049	downregulated	20	5.9617	0.0026	downregulated	29	6.13256	0.0022	downregulated	29	7.17007	0.0008
eosinophil migration	GO	4 out of 7	11.6602	downregulated	1	2.49718	0.0823					upregulated	1	2.69553	0.0675					downregulated	1	3.80085	0.0224	downregulated	2	4.84488	0.0079	downregulated	2	2.81616	0.0598
fatty acid metabolic process	GO	3 out of 7	11.6348	downregulated	11	4.5038	0.0111	upregulated	15	3.58242	0.0278	upregulated	15	7.43596	0.0006	downregulated	14	6.36581	0.0017	downregulated	29	11.4861	1e-05	downregulated	44	9.76404	5.7e-05	downregulated	36	7.17025	0.0008
translation activator activity	GO	5 out of 7	11.5844	upregulated	1	1.03509	0.3552	upregulated	1	1.63549	0.1949	upregulated	1	4.3239	0.0132					downregulated	1	2.50818	0.0814	downregulated	2	2.08174	0.1247	upregulated	2	2.20824	0.1099
macrophage migration	GO	3 out of 7	11.5611					upregulated	3	9.05601	0.0001					downregulated	1	2.02081	0.1325	upregulated	1	0.426993	0.6525	downregulated	2	2.98957	0.0503	downregulated	2	1.96337	0.1404
chloride transmembrane transport	GO	5 out of 7	11.5572	upregulated	6	5.71007	0.0033	upregulated	3	1.19729	0.302	downregulated	7	4.72812	0.0088	downregulated	6	4.81231	0.0081	downregulated	6	3.55793	0.0285	downregulated	10	4.49499	0.0112	downregulated	12	6.13735	0.0022
UDP-glycosyltransferase activity	GO	6 out of 7	11.5449	upregulated	2	1.68795	0.1849	upregulated	6	2.8271	0.0592	upregulated	6	4.78976	0.0083	downregulated	7	1.86025	0.1556	downregulated	6	1.77616	0.1693	downregulated	8	1.3152	0.2684	downregulated	9	1.009	0.3646
lipid catabolic process	GO	4 out of 7	11.4932	downregulated	4	3.89207	0.0204	upregulated	14	4.60687	0.01	downregulated	16	5.72851	0.0033	downregulated	11	2.7245	0.0656	downregulated	23	7.1862	0.0008	downregulated	39	7.16929	0.0008	downregulated	30	4.87592	0.0076
phosphatidylinositol-4,5-bisphosphate phosphatase activity	GO	4 out of 7	11.4835	upregulated	3	3.38613	0.0338	downregulated	1	1.51458	0.2199	downregulated	1	1.96285	0.1405	downregulated	1	1.21701	0.2961	downregulated	2	2.30318	0.0999	downregulated	4	5.5977	0.0037	downregulated	4	4.89097	0.0075
midbrain dopaminergic neuron differentiation	GO	3 out of 7	11.4584																	downregulated	1	3.89843	0.0203	downregulated	2	4.05835	0.0173	downregulated	2	3.50166	0.0301
autophagosome maturation	GO	4 out of 7	11.4545	upregulated	2	1.68511	0.1854	upregulated	2	1.67008	0.1882	downregulated	2	3.14007	0.0433	downregulated	2	3.00353	0.0496	downregulated	4	3.19646	0.0409	downregulated	8	6.24328	0.0019	downregulated	8	7.99964	0.0003
regulation of sensory perception of pain	GO	4 out of 7	11.3894	upregulated	1	3.45688	0.0315	upregulated	1	3.08749	0.0456	upregulated	2	4.9517	0.0071	downregulated	2	1.73135	0.177	upregulated	5	2.29057	0.1012	downregulated	3	3.91529	0.0199	downregulated	4	0.845452	0.4294
regulation of removal of superoxide radicals	GO	4 out of 7	11.3757	upregulated	1	1.76009	0.172	upregulated	1	2.67324	0.069									downregulated	1	3.02904	0.0484	downregulated	1	4.06914	0.0171	downregulated	2	2.87321	0.0565
cellular response to reactive nitrogen species	GO	5 out of 7	11.3728	upregulated	2	2.85698	0.0574	upregulated	2	3.01635	0.049	upregulated	2	2.03211	0.1311	downregulated	3	2.67051	0.0692	downregulated	3	3.31393	0.0364	downregulated	4	2.8239	0.0594	upregulated	4	2.36282	0.0942
protein self-association	GO	4 out of 7	11.3597	upregulated	3	1.46104	0.232	upregulated	3	6.38657	0.0017	downregulated	3	2.80372	0.0606	downregulated	2	1.8316	0.1602	downregulated	3	1.91951	0.1467	downregulated	9	5.03956	0.0065	downregulated	6	3.1079	0.0447
exploration behavior	GO	5 out of 7	11.335	upregulated	1	2.32704	0.0976	upregulated	1	0.607549	0.5447									downregulated	3	1.17072	0.3101	downregulated	3	3.63935	0.0263	downregulated	5	3.59033	0.0276
carbohydrate catabolic process	GO	3 out of 7	11.2957	downregulated	2	0.728861	0.4825	downregulated	1	0.932333	0.3936	downregulated	7	1.08514	0.3379	downregulated	7	4.40855	0.0122	downregulated	8	4.17947	0.0153	downregulated	23	8.7511	0.0002	downregulated	17	5.52004	0.004
positive regulation of viral process	GO	5 out of 7	11.2904	upregulated	3	0.241044	0.7858	upregulated	6	3.44307	0.032	downregulated	6	2.10204	0.1222	downregulated	3	0.991549	0.371	downregulated	9	2.62117	0.0727	downregulated	14	5.52325	0.004	downregulated	12	2.55545	0.0777
negative regulation of neuron migration	GO	4 out of 7	11.2649	upregulated	2	3.19226	0.0411					upregulated	1	1.00732	0.3652					upregulated	1	1.91549	0.1473	downregulated	4	5.08812	0.0062	downregulated	5	3.89263	0.0204
body fluid secretion	GO	6 out of 7	11.2472	downregulated	2	2.61831	0.0729	upregulated	1	1.92434	0.146	upregulated	2	0.59033	0.5541	upregulated	1	1.28976	0.2753	downregulated	5	3.69204	0.0249	downregulated	6	3.86198	0.021	downregulated	7	2.50708	0.0815
regulation of viral genome replication	GO	4 out of 7	11.2167	downregulated	5	2.65344	0.0704	upregulated	8	8.49811	0.0002	downregulated	1	0.0123737	0.9877					downregulated	5	0.620403	0.5377	downregulated	11	2.27225	0.1031	downregulated	11	2.49178	0.0828
regulation of neurotransmitter receptor activity	GO	4 out of 7	11.1882	upregulated	3	3.12575	0.0439	downregulated	3	2.74094	0.0645	upregulated	3	4.36794	0.0127					upregulated	4	3.96563	0.019	downregulated	8	4.56718	0.0104	downregulated	10	5.83391	0.0029
regulation of epithelial cell proliferation	GO	5 out of 7	11.1846	downregulated	11	2.91546	0.0542	upregulated	17	4.59905	0.0101	upregulated	15	4.35773	0.0128	downregulated	15	3.50266	0.0301	downregulated	27	3.91361	0.02	downregulated	34	2.07728	0.1253	downregulated	29	2.65502	0.0703
cell cycle G1/S phase transition	GO	4 out of 7	11.1478	upregulated	7	1.1765	0.3084	upregulated	14	12.9347	2.4e-06	upregulated	5	2.3156	0.0987	downregulated	11	5.5633	0.0038	downregulated	6	3.42572	0.0325	upregulated	8	0.839712	0.4318	upregulated	9	2.30172	0.1001
cellular response to increased oxygen levels	GO	4 out of 7	11.1437					upregulated	1	3.42815	0.0324									downregulated	1	1.49498	0.2243	downregulated	3	2.77416	0.0624	downregulated	4	3.4464	0.0319
polysaccharide binding	GO	4 out of 7	11.0537					upregulated	1	1.22969	0.2924	upregulated	2	3.34443	0.0353					downregulated	4	5.31181	0.0049	downregulated	2	2.42132	0.0888	downregulated	3	2.09084	0.1236
establishment of protein localization to peroxisome	GO	4 out of 7	11.027	upregulated	2	0.341624	0.7106	upregulated	7	6.44734	0.0016	upregulated	4	5.78712	0.0031	downregulated	2	1.33984	0.2619	downregulated	7	2.73017	0.0652	upregulated	4	1.92413	0.146	upregulated	4	1.01527	0.3623
postsynaptic density membrane	GO	5 out of 7	11.0001	upregulated	1	3.53791	0.0291					upregulated	1	2.44078	0.0871					downregulated	1	0.477421	0.6204	downregulated	4	1.39701	0.2473	downregulated	5	3.14701	0.043
pigment granule organization	GO	4 out of 7	10.985	downregulated	1	0.848355	0.4281					upregulated	2	2.10306	0.1221					downregulated	3	3.41173	0.033	downregulated	4	3.55397	0.0286	downregulated	4	2.76456	0.063
intrinsic component of Golgi membrane	GO	5 out of 7	10.9657	downregulated	1	0.715143	0.4891	upregulated	4	4.47092	0.0114	upregulated	3	3.55387	0.0286	downregulated	5	5.93008	0.0027	downregulated	7	4.30562	0.0135	downregulated	6	2.35898	0.0945	downregulated	8	2.92156	0.0538
dynein complex	GO	6 out of 7	10.9474	upregulated	2	1.27746	0.2787	upregulated	2	1.73608	0.1762	downregulated	4	2.16801	0.1144	upregulated	1	2.27185	0.1031	downregulated	5	2.07843	0.1251	downregulated	10	3.55852	0.0285	downregulated	4	2.19308	0.1116
embryonic brain development	GO	3 out of 7	10.9328									downregulated	1	0.635024	0.5299					downregulated	1	4.328	0.0132	downregulated	1	4.35908	0.0128	downregulated	2	2.88078	0.0561
Golgi cisterna	GO	4 out of 7	10.9256	upregulated	2	0.620893	0.5375	upregulated	4	1.69337	0.1839	upregulated	3	2.0702	0.1262	downregulated	5	1.77147	0.1701	upregulated	7	0.189615	0.8273	downregulated	15	3.63888	0.0263	downregulated	18	8.50219	0.0002
negative regulation of potassium ion transmembrane transporter activity	GO	6 out of 7	10.9132	upregulated	1	0.983674	0.3739	upregulated	1	3.14583	0.043	upregulated	1	1.39483	0.2479	upregulated	1	3.29365	0.0371					downregulated	2	0.544379	0.5802	downregulated	2	1.5508	0.2121
adenylate cyclase-activating adrenergic receptor signaling pathway	GO	4 out of 7	10.911					upregulated	1	0.919202	0.3988	downregulated	1	0.26833	0.7647					downregulated	3	5.49305	0.0041	downregulated	2	1.85649	0.1562	downregulated	3	2.91059	0.0544
adrenergic receptor signaling pathway	GO	4 out of 7	10.911					upregulated	1	0.919202	0.3988	downregulated	1	0.26833	0.7647					downregulated	3	5.49305	0.0041	downregulated	2	1.85649	0.1562	downregulated	3	2.91059	0.0544
thiolester hydrolase activity	GO	5 out of 7	10.8922	upregulated	2	1.29163	0.2748	upregulated	1	0.964281	0.3813	downregulated	2	1.73878	0.1757					downregulated	1	0.277403	0.7577	downregulated	8	5.09288	0.0061	downregulated	7	5.00478	0.0067
positive regulation of telomere capping	GO	5 out of 7	10.8825	upregulated	2	3.25254	0.0387	upregulated	1	1.5617	0.2098	downregulated	1	1.76773	0.1707					downregulated	1	0.973982	0.3776	downregulated	4	3.66926	0.0255	downregulated	3	3.19271	0.0411
phospholipid binding	GO	1 out of 7	10.8652	downregulated	11	2.53751	0.0791	upregulated	7	0.944358	0.3889	downregulated	41	15.4656	1.9e-07	downregulated	25	8.02771	0.0003	downregulated	37	10.8652	1.9e-05	downregulated	64	19.7215	2.7e-09	downregulated	56	15.945	1.2e-07
generation of precursor metabolites and energy	GO	1 out of 7	10.8638	upregulated	11	1.24741	0.2872	upregulated	15	3.42172	0.0327	upregulated	11	4.0725	0.017	downregulated	12	1.71244	0.1804	downregulated	39	10.8638	1.9e-05	downregulated	77	33.246	3.6e-15	downregulated	65	25.1741	1.2e-11
diencephalon development	GO	5 out of 7	10.8471	downregulated	1	1.21905	0.2955	upregulated	1	0.687228	0.503	downregulated	4	3.6127	0.027	upregulated	1	0.785661	0.4558	downregulated	6	5.91352	0.0027	downregulated	7	4.67813	0.0093	downregulated	7	3.61431	0.0269
phosphatidylinositol-3,5-bisphosphate phosphatase activity	GO	4 out of 7	10.8269	upregulated	1	0.783858	0.4566					downregulated	2	2.94396	0.0527	downregulated	1	1.01244	0.3633	downregulated	4	5.90433	0.0027	downregulated	6	5.19354	0.0056	downregulated	4	2.90158	0.0549
cell redox homeostasis	GO	5 out of 7	10.7647	downregulated	1	0.496337	0.6088	upregulated	2	1.16849	0.3108	upregulated	1	0.209995	0.8106					downregulated	4	4.12073	0.0162	downregulated	9	3.05025	0.0473	downregulated	8	2.71161	0.0664
positive regulation of cell growth	GO	3 out of 7	10.7553	downregulated	4	1.79004	0.167	downregulated	4	3.32745	0.0359	downregulated	9	4.88216	0.0076	downregulated	12	5.24504	0.0053	downregulated	12	1.80167	0.165	downregulated	30	9.65268	6.4e-05	downregulated	30	14.5457	4.8e-07
regulation of calcium ion transmembrane transport via high voltage-gated calcium channel	GO	5 out of 7	10.7271	upregulated	2	4.14642	0.0158	upregulated	1	1.73973	0.1756	upregulated	2	2.95168	0.0523					downregulated	1	0.972146	0.3783	downregulated	3	3.18646	0.0413	upregulated	1	2.26938	0.1034
cell cortex	GO	1 out of 7	10.7196	upregulated	14	3.34547	0.0352	upregulated	14	2.93862	0.0529	downregulated	37	15.4706	1.9e-07	downregulated	21	8.34804	0.0002	downregulated	33	10.7196	2.2e-05	downregulated	42	10.6497	2.4e-05	downregulated	39	9.1918	0.0001
postsynaptic specialization membrane	GO	5 out of 7	10.5803	upregulated	1	3.49655	0.0303					upregulated	1	2.40072	0.0907					downregulated	1	0.452829	0.6358	downregulated	4	1.29437	0.2741	downregulated	5	2.9358	0.0531
outer dynein arm assembly	GO	6 out of 7	10.5602					upregulated	1	1.69763	0.1831	upregulated	1	2.44748	0.0865	upregulated	1	3.64268	0.0262	downregulated	1	0.632915	0.531	downregulated	1	0.818166	0.4412	downregulated	1	1.3213	0.2668
negative regulation of ERAD pathway	GO	4 out of 7	10.5524	upregulated	3	4.23777	0.0144	upregulated	1	1.65514	0.1911									upregulated	3	2.38946	0.0917	downregulated	4	3.21077	0.0403	downregulated	4	3.83818	0.0215
methyltransferase activity	GO	5 out of 7	10.5495	upregulated	15	2.50005	0.0821	upregulated	18	9.94636	4.8e-05	upregulated	7	3.74503	0.0236	upregulated	3	6.71306	0.0012	upregulated	34	12.0215	6e-06	downregulated	21	0.512008	0.5993	upregulated	15	0.845591	0.4293
modulation by host of viral process	GO	4 out of 7	10.5092					upregulated	3	4.86632	0.0077									downregulated	3	2.48648	0.0832	downregulated	2	1.7148	0.18	downregulated	3	1.44161	0.2365
negative regulation of mRNA catabolic process	GO	4 out of 7	10.4397	upregulated	7	5.25436	0.0052	upregulated	1	0.818303	0.4412	downregulated	4	0.927746	0.3954	upregulated	1	1.1466	0.3177	downregulated	4	5.9571	0.0026	downregulated	7	4.39317	0.0124	upregulated	9	5.38375	0.0046
molecular adaptor activity	GO	4 out of 7	10.3981	downregulated	7	1.33395	0.2634	upregulated	8	4.11799	0.0163	downregulated	13	2.65806	0.0701	upregulated	2	1.18463	0.3059	downregulated	9	3.43558	0.0322	downregulated	31	5.65194	0.0035	downregulated	23	5.23579	0.0053
hormone secretion	GO	5 out of 7	10.3322	downregulated	2	1.15756	0.3143	upregulated	1	0.161799	0.8506	upregulated	3	2.3305	0.0972	downregulated	2	1.67073	0.1881	downregulated	3	1.54208	0.2139	downregulated	12	5.87591	0.0028	downregulated	6	3.25024	0.0388
sperm principal piece	GO	6 out of 7	10.3242	upregulated	1	0.648874	0.5226	upregulated	2	3.10522	0.0448	upregulated	1	1.47399	0.229					downregulated	3	2.54678	0.0783	downregulated	2	0.728226	0.4828	downregulated	3	1.8211	0.1618
positive regulation of cation transmembrane transport	GO	4 out of 7	10.28	upregulated	7	4.34178	0.013	downregulated	1	2.31896	0.0984	downregulated	8	5.87309	0.0028	downregulated	3	2.85642	0.0575	downregulated	14	6.24211	0.0019	downregulated	18	5.49337	0.0041	downregulated	16	5.25125	0.0052
negative regulation of signaling receptor activity	GO	4 out of 7	10.2633	downregulated	3	2.09069	0.1236					upregulated	4	4.17392	0.0154	upregulated	2	4.36191	0.0128	downregulated	6	1.52335	0.218	downregulated	4	1.58872	0.2042	downregulated	5	2.29482	0.1008
regulation of relaxation of muscle	GO	5 out of 7	10.2031					upregulated	1	1.93779	0.144	upregulated	1	1.44821	0.235					downregulated	1	1.32297	0.2663	downregulated	2	1.64617	0.1928	downregulated	3	3.84799	0.0213
maintenance of protein localization in organelle	GO	5 out of 7	10.1923	upregulated	3	2.67907	0.0686	upregulated	4	6.22405	0.002	upregulated	2	1.38191	0.2511	downregulated	2	0.755334	0.4699	upregulated	8	3.20558	0.0405	downregulated	8	1.941	0.1436	downregulated	5	1.92716	0.1456
mitochondrial membrane organization	GO	3 out of 7	10.1918	downregulated	4	1.12314	0.3253	upregulated	4	0.833295	0.4346	upregulated	5	2.71964	0.0659	upregulated	1	1.24166	0.2889	downregulated	13	9.23995	9.7e-05	downregulated	27	16.7322	5.4e-08	downregulated	22	15.6137	1.7e-07
lactation	GO	4 out of 7	10.1309	downregulated	1	2.99215	0.0502	upregulated	1	2.28547	0.1017	downregulated	3	0.510159	0.6004					downregulated	2	4.07384	0.017	downregulated	4	4.19467	0.0151	downregulated	6	3.07922	0.046
astrocyte projection	GO	4 out of 7	10.0927									upregulated	1	1.79841	0.1656					downregulated	2	2.43839	0.0873	downregulated	2	3.14849	0.0429	downregulated	2	2.70738	0.0667
morphogenesis of embryonic epithelium	GO	5 out of 7	10.0681	upregulated	3	0.58956	0.5546	upregulated	4	2.52884	0.0798	downregulated	13	6.14111	0.0022	downregulated	4	0.637167	0.5288	downregulated	9	5.48243	0.0042	downregulated	13	4.58296	0.0102	downregulated	12	3.66257	0.0257
polysaccharide metabolic process	GO	1 out of 7	10.0652	upregulated	2	1.0038	0.3665	downregulated	2	1.11472	0.328	upregulated	3	2.40883	0.0899	downregulated	7	5.14756	0.0058	downregulated	12	10.0652	4.3e-05	downregulated	16	11.8007	7.5e-06	downregulated	13	7.00287	0.0009
regulation of transmission of nerve impulse	GO	5 out of 7	10.047	upregulated	1	4.36763	0.0127					downregulated	1	3.50549	0.03	upregulated	1	2.84587	0.0581	downregulated	1	2.0605	0.1274	downregulated	1	1.71828	0.1794	downregulated	1	2.56019	0.0773
positive regulation of long-term synaptic potentiation	GO	3 out of 7	10.0464					downregulated	1	1.29153	0.2749	upregulated	1	2.70822	0.0667					downregulated	2	4.79133	0.0083	downregulated	4	4.64378	0.0096	downregulated	4	3.98596	0.0186
regulation of long term synaptic depression	GO	4 out of 7	9.98733	upregulated	1	0.792063	0.4529	downregulated	1	1.52403	0.2178									downregulated	3	4.51162	0.011	downregulated	3	3.47669	0.0309	downregulated	2	2.73099	0.0652
ERAD pathway	GO	4 out of 7	9.96131	upregulated	7	3.07385	0.0462	upregulated	10	9.25656	9.5e-05	upregulated	3	0.876082	0.4164	downregulated	4	0.903255	0.4052	upregulated	12	2.22084	0.1085	upregulated	8	2.70879	0.0666	downregulated	12	2.5877	0.0752
nuclear import signal receptor activity	GO	5 out of 7	9.87714	upregulated	1	0.935715	0.3923									upregulated	1	2.55092	0.078	downregulated	2	1.93966	0.1438	downregulated	2	1.3706	0.254	downregulated	4	3.08024	0.0459
negative regulation of voltage-gated calcium channel activity	GO	4 out of 7	9.85734	upregulated	1	2.12611	0.1193					upregulated	1	1.40502	0.2454	upregulated	1	2.88958	0.0556	upregulated	1	3.83158	0.0217	downregulated	2	3.43663	0.0322	upregulated	1	3.61454	0.0269
transferase activity, transferring pentosyl groups	GO	6 out of 7	9.85308	upregulated	3	1.05615	0.3478	upregulated	2	0.946241	0.3882	upregulated	1	2.92772	0.0535	upregulated	1	1.82344	0.1615	upregulated	5	0.773246	0.4615	downregulated	4	2.09307	0.1233	downregulated	3	1.77971	0.1687
retinol binding	GO	6 out of 7	9.83147	upregulated	1	2.54825	0.0782					upregulated	1	1.77097	0.1702	upregulated	1	2.41131	0.0897	downregulated	1	1.59792	0.2023	downregulated	1	0.885603	0.4125	downregulated	1	0.617416	0.5393
neutral lipid metabolic process	GO	3 out of 7	9.82846	downregulated	2	4.97486	0.0069	upregulated	4	2.64967	0.0707	upregulated	7	6.78609	0.0011	downregulated	4	3.25537	0.0386	downregulated	11	8.62292	0.0002	downregulated	11	3.89955	0.0203	upregulated	9	3.93813	0.0195
cerebral cortex development	GO	4 out of 7	9.77659	upregulated	3	0.839943	0.4317	upregulated	6	6.1683	0.0021	downregulated	8	3.97101	0.0189	downregulated	6	3.75367	0.0234	upregulated	15	6.84843	0.0011	downregulated	22	9.06177	0.0001	downregulated	20	8.27969	0.0003
drug transmembrane transporter activity	GO	4 out of 7	9.71336	upregulated	4	1.82439	0.1613	upregulated	2	2.89922	0.0551	upregulated	3	5.72758	0.0033	downregulated	2	1.57574	0.2069	downregulated	5	3.48087	0.0308	downregulated	12	3.67934	0.0252	upregulated	5	2.84142	0.0583
endosome to melanosome transport	GO	3 out of 7	9.67677																	downregulated	1	1.38495	0.2503	downregulated	4	6.36253	0.0017	downregulated	2	1.92929	0.1453
spanning component of membrane	GO	5 out of 7	9.67361	upregulated	1	1.31652	0.2681	downregulated	1	1.794	0.1663	upregulated	2	4.29771	0.0136					downregulated	1	0.886686	0.412	downregulated	2	1.09273	0.3353	downregulated	3	3.87397	0.0208
aminoacyl-tRNA synthetase multienzyme complex	GO	4 out of 7	9.66935					upregulated	2	3.48906	0.0305	downregulated	1	0.65912	0.5173					downregulated	2	1.90887	0.1482	downregulated	4	3.17877	0.0416	downregulated	3	1.75177	0.1735
meiotic chromosome segregation	GO	6 out of 7	9.66384	upregulated	3	0.532562	0.5871	upregulated	8	6.35258	0.0017	upregulated	2	1.39589	0.2476	upregulated	1	0.773667	0.4613	downregulated	3	0.670496	0.5115	upregulated	1	0.136647	0.8723	downregulated	4	0.0752989	0.9275
single fertilization	GO	4 out of 7	9.65373	upregulated	3	1.06448	0.3449					upregulated	5	2.96842	0.0514	upregulated	3	2.91258	0.0543	downregulated	9	2.70825	0.0667	downregulated	9	1.38682	0.2499	downregulated	8	0.693735	0.4997
mechanosensory behavior	GO	3 out of 7	9.63043	upregulated	1	2.54825	0.0782					downregulated	1	0.303783	0.738					downregulated	1	2.51348	0.081	downregulated	4	3.73954	0.0238	downregulated	2	3.64643	0.0261
aminoacyl-tRNA metabolism involved in translational fidelity	GO	3 out of 7	9.59423					downregulated	1	2.28286	0.102									downregulated	2	3.12298	0.044	downregulated	4	4.11087	0.0164	downregulated	4	4.64323	0.0096
inner ear morphogenesis	GO	4 out of 7	9.58774	downregulated	3	1.79968	0.1654	downregulated	2	1.56803	0.2085	upregulated	6	2.91668	0.0541					downregulated	8	4.82388	0.008	downregulated	7	1.15502	0.3151	downregulated	5	2.26019	0.1043
ovulation cycle process	GO	4 out of 7	9.54839	upregulated	2	1.99747	0.1357					upregulated	1	1.75153	0.1735	downregulated	1	0.663934	0.5148	downregulated	3	5.65882	0.0035	upregulated	5	2.70904	0.0666	downregulated	5	3.51355	0.0298
protein binding, bridging	GO	4 out of 7	9.54613	downregulated	6	1.20744	0.299	upregulated	8	4.57618	0.0103	downregulated	11	2.35022	0.0953	upregulated	2	1.30043	0.2724	upregulated	11	3.73912	0.0238	downregulated	27	5.12505	0.0059	downregulated	22	5.84126	0.0029
mitochondrial inner membrane presequence translocase complex	GO	1 out of 7	9.54283																	downregulated	4	9.54283	7.2e-05	downregulated	5	5.44736	0.0043	downregulated	4	4.62028	0.0099
fertilization	GO	6 out of 7	9.51703	upregulated	4	0.858719	0.4237					upregulated	5	2.48278	0.0835	upregulated	3	2.45492	0.0859	downregulated	10	2.40401	0.0904	downregulated	10	0.930705	0.3943	downregulated	10	0.3859	0.6798
cellular response to sterol	GO	3 out of 7	9.50286	upregulated	1	1.78279	0.1682									downregulated	1	1.27599	0.2792	upregulated	2	0.900716	0.4063	downregulated	4	4.31849	0.0133	downregulated	4	5.57828	0.0038
regulation of circadian rhythm	GO	5 out of 7	9.47225	upregulated	8	2.57484	0.0762	upregulated	5	1.56415	0.2093	upregulated	3	1.69891	0.1829	downregulated	5	1.38917	0.2493	downregulated	9	5.60323	0.0037	downregulated	11	1.69351	0.1839	downregulated	15	3.33001	0.0358
neuronal stem cell division	GO	4 out of 7	9.46986					downregulated	1	1.84398	0.1582	downregulated	2	4.65103	0.0096	upregulated	1	2.13869	0.1178	downregulated	2	3.85077	0.0213	downregulated	4	5.71819	0.0033	downregulated	2	4.25722	0.0142
regulation of hepatocyte proliferation	GO	4 out of 7	9.45067					upregulated	2	3.98015	0.0187	downregulated	1	1.25105	0.2862					downregulated	1	1.10353	0.3317	downregulated	2	1.56074	0.21	downregulated	3	4.05731	0.0173
hemoglobin complex	GO	1 out of 7	9.43027									downregulated	1	5.83637	0.0029					downregulated	3	9.43027	8e-05
oxidoreductase activity, acting on a sulfur group of donors	GO	6 out of 7	9.40097	upregulated	4	1.18329	0.3063	upregulated	2	1.20993	0.2982	upregulated	1	0.233789	0.7915	upregulated	1	1.12102	0.3259	downregulated	6	3.77863	0.0229	downregulated	10	2.71689	0.0661	downregulated	9	2.93605	0.0531
response to oxidative stress	GO	2 out of 7	9.39969	downregulated	10	2.58278	0.0756	upregulated	15	2.97847	0.0509	downregulated	30	6.31642	0.0018	downregulated	20	3.79809	0.0224	downregulated	37	19.1185	5e-09	downregulated	49	6.88425	0.001	upregulated	33	6.54704	0.0014
protein tag	GO	4 out of 7	9.39267	upregulated	3	5.80501	0.003	upregulated	1	1.35367	0.2583													downregulated	1	1.58688	0.2046	downregulated	1	0.647115	0.5236
regulation of behavior	GO	5 out of 7	9.36754	upregulated	6	6.3232	0.0018	upregulated	3	1.5362	0.2152	upregulated	1	1.48385	0.2268	downregulated	2	1.1783	0.3078	upregulated	5	3.75835	0.0233	downregulated	6	2.94644	0.0525	downregulated	6	2.0145	0.1334
outer mitochondrial membrane protein complex	GO	5 out of 7	9.35199	upregulated	1	0.702666	0.4953	upregulated	1	0.992992	0.3705	downregulated	2	1.5654	0.209					downregulated	1	0.710415	0.4914	downregulated	5	5.00543	0.0067	downregulated	3	3.50588	0.03
clathrin coat	GO	3 out of 7	9.34955	downregulated	3	3.02576	0.0485	downregulated	3	2.3543	0.095	downregulated	5	2.84116	0.0584	upregulated	1	2.42533	0.0884	upregulated	9	1.66985	0.1883	downregulated	15	11.4299	1.1e-05	downregulated	12	5.38536	0.0046
striated muscle contraction	GO	4 out of 7	9.32611	upregulated	6	6.01392	0.0024	downregulated	4	4.98287	0.0069	upregulated	5	1.79333	0.1664	upregulated	2	2.73042	0.0652	downregulated	4	3.77131	0.023	downregulated	16	9.19057	0.0001	downregulated	12	7.52887	0.0005
heme-copper terminal oxidase activity	GO	6 out of 7	9.3112	upregulated	1	1.46654	0.2307	upregulated	2	2.30734	0.0995	upregulated	1	0.93659	0.392					downregulated	1	0.518405	0.5955	downregulated	2	1.86706	0.1546	downregulated	2	2.21526	0.1091
nucleotide-sugar metabolic process	GO	5 out of 7	9.21238	upregulated	3	1.62747	0.1964	upregulated	3	4.10813	0.0164	upregulated	2	2.339	0.0964					upregulated	6	4.37771	0.0126	downregulated	4	2.29892	0.1004	downregulated	6	3.21656	0.0401
negative regulation of vascular smooth muscle cell proliferation	GO	3 out of 7	9.20316	upregulated	3	8.42688	0.0002					upregulated	2	2.62938	0.0721	upregulated	1	3.29365	0.0371	upregulated	2	0.771671	0.4622	upregulated	1	1.22668	0.2933	upregulated	4	3.14839	0.0429
carboxylic ester hydrolase activity	GO	3 out of 7	9.17974	downregulated	2	1.21363	0.2971	downregulated	1	0.338641	0.7127	downregulated	6	4.3275	0.0132	downregulated	6	2.79393	0.0612	downregulated	12	5.02257	0.0066	downregulated	21	7.12509	0.0008	downregulated	18	5.70578	0.0033
negative regulation of autophagosome assembly	GO	4 out of 7	9.16627					upregulated	1	0.977783	0.3761	downregulated	1	0.767381	0.4642	downregulated	2	2.58897	0.0751	downregulated	3	3.63577	0.0264	downregulated	5	4.75346	0.0086	downregulated	4	3.1556	0.0426
regulation of viral release from host cell	GO	5 out of 7	9.10345	upregulated	2	0.902306	0.4056	upregulated	4	4.9931	0.0068	upregulated	1	0.684074	0.5046					downregulated	4	2.11954	0.1201	downregulated	5	1.69762	0.1831	downregulated	4	0.826349	0.4376
oxygen carrier activity	GO	1 out of 7	9.08244	downregulated	1	1.98133	0.1379					downregulated	1	5.66955	0.0034					downregulated	2	9.08244	0.0001
glutathione binding	GO	4 out of 7	9.05652	upregulated	1	1.79567	0.166													downregulated	3	4.74071	0.0087	downregulated	2	1.76647	0.1709	downregulated	1	0.753672	0.4706
translation initiation factor binding	GO	4 out of 7	9.05271					upregulated	2	1.00863	0.3647	downregulated	1	0.0953986	0.909					downregulated	4	3.70597	0.0246	downregulated	6	2.78805	0.0615	downregulated	3	1.64545	0.1929
ion channel activity	GO	1 out of 7	9.03801	upregulated	22	12.0413	5.9e-06	downregulated	6	1.27349	0.2799	downregulated	24	8.44112	0.0002	upregulated	4	2.98916	0.0503	downregulated	30	9.03801	0.0001	downregulated	65	24.9594	1.4e-11	downregulated	57	17.6829	2.1e-08
energy reserve metabolic process	GO	1 out of 7	9.01429	upregulated	2	2.76	0.0633	downregulated	1	0.404286	0.6675	upregulated	2	1.60326	0.2012	downregulated	4	1.97295	0.139	downregulated	12	9.01429	0.0001	downregulated	14	11.0472	1.6e-05	downregulated	11	10.3759	3.1e-05
intramolecular oxidoreductase activity, transposing C=C bonds	GO	5 out of 7	9.0032									upregulated	1	1.96962	0.1395	upregulated	1	2.74587	0.0642	downregulated	1	0.967738	0.3799	downregulated	2	1.56036	0.2101	downregulated	2	1.7596	0.1721
positive regulation of cell cycle phase transition	GO	5 out of 7	8.99642	upregulated	2	0.211873	0.8091	upregulated	3	1.1051	0.3312	downregulated	5	1.02865	0.3575	downregulated	3	1.22445	0.2939	downregulated	7	3.12273	0.044	downregulated	12	3.71194	0.0244	downregulated	11	3.09788	0.0451
response to ionizing radiation	GO	3 out of 7	8.97275	upregulated	8	1.64694	0.1926	upregulated	14	7.04937	0.0009	upregulated	8	4.23884	0.0144	downregulated	4	0.548975	0.5775	upregulated	17	1.72455	0.1783	upregulated	7	0.541704	0.5818	upregulated	6	1.14716	0.3175
extrinsic component of organelle membrane	GO	5 out of 7	8.96802	upregulated	2	0.757129	0.469	downregulated	1	0.636359	0.5292	upregulated	2	1.44926	0.2347	downregulated	3	2.02804	0.1316	downregulated	3	2.14692	0.1168	downregulated	5	3.48743	0.0306	downregulated	4	3.79168	0.0226
serine/threonine protein kinase complex	GO	5 out of 7	8.79255	upregulated	6	2.08075	0.1248	upregulated	4	5.40323	0.0045	upregulated	3	1.2238	0.2941	downregulated	5	1.549	0.2125	upregulated	12	1.49565	0.2241	downregulated	10	1.63366	0.1952	downregulated	12	1.49575	0.2241
cell-cell signaling involved in cardiac conduction	GO	5 out of 7	8.78344	upregulated	2	2.94574	0.0526	downregulated	2	4.1904	0.0151	upregulated	2	1.85187	0.1569	downregulated	1	1.95199	0.142	downregulated	2	3.76879	0.0231	downregulated	5	4.53262	0.0108	downregulated	2	1.82681	0.1609
sulfur compound metabolic process	GO	3 out of 7	8.78216	downregulated	6	0.593761	0.5522	upregulated	12	2.08874	0.1238	upregulated	13	3.95851	0.0191	downregulated	18	4.21332	0.0148	downregulated	29	7.54198	0.0005	downregulated	50	7.88715	0.0004	downregulated	38	6.63801	0.0013
spermatid development	GO	4 out of 7	8.76826	upregulated	9	2.80964	0.0602	upregulated	5	1.39982	0.2466	upregulated	6	3.36647	0.0345	downregulated	7	3.1313	0.0437	downregulated	13	4.32363	0.0133	downregulated	19	3.50194	0.0301	downregulated	17	2.65575	0.0702
cytoplasmic translational initiation	GO	3 out of 7	8.7544									downregulated	2	1.07646	0.3408	downregulated	2	3.24081	0.0391	downregulated	3	5.14415	0.0058	downregulated	4	4.11853	0.0163	downregulated	3	3.80899	0.0222
ventricular cardiac muscle cell action potential	GO	3 out of 7	8.74987					downregulated	2	7.47103	0.0006					downregulated	1	2.31225	0.099	downregulated	3	7.49531	0.0006	downregulated	4	6.02117	0.0024	downregulated	4	5.01667	0.0066
positive regulation of neuron death	GO	2 out of 7	8.74364	downregulated	1	0.213517	0.8077	downregulated	2	3.03516	0.0481	downregulated	5	1.86844	0.1544	downregulated	4	3.10609	0.0448	upregulated	5	1.4166	0.2425	downregulated	15	7.20362	0.0007	downregulated	11	8.14466	0.0003
positive regulation of mitotic cell cycle phase transition	GO	4 out of 7	8.73122	upregulated	2	0.273227	0.7609	downregulated	1	1.19315	0.3033	downregulated	5	1.29448	0.274	downregulated	2	0.783109	0.457	downregulated	7	3.54902	0.0288	downregulated	12	4.2891	0.0137	downregulated	11	3.89062	0.0204
skeletal muscle fiber development	GO	4 out of 7	8.73061	upregulated	1	4.44264	0.0118	upregulated	1	2.86693	0.0569	downregulated	1	0.42605	0.6531					upregulated	1	0.713255	0.49	downregulated	2	0.802584	0.4482	downregulated	1	1.75775	0.1724
mitochondrial matrix	GO	1 out of 7	8.72011	upregulated	31	4.02122	0.0179	upregulated	22	6.25153	0.0019	upregulated	18	3.42549	0.0325	upregulated	3	0.56279	0.5696	downregulated	41	8.72011	0.0002	downregulated	74	13.6343	1.2e-06	downregulated	61	11.2277	1.3e-05
response to BMP	GO	5 out of 7	8.71042	upregulated	9	6.84686	0.0011	downregulated	1	2.46505	0.085	upregulated	5	1.90962	0.1481	upregulated	2	3.01651	0.049	upregulated	12	2.67732	0.0687	downregulated	7	1.17854	0.3077	downregulated	7	0.901263	0.4061
cellular response to BMP stimulus	GO	5 out of 7	8.71042	upregulated	9	6.84686	0.0011	downregulated	1	2.46505	0.085	upregulated	5	1.90962	0.1481	upregulated	2	3.01651	0.049	upregulated	12	2.67732	0.0687	downregulated	7	1.17854	0.3077	downregulated	7	0.901263	0.4061
phosphatidylinositol-3,5-bisphosphate 3-phosphatase activity	GO	4 out of 7	8.68436	upregulated	1	0.890173	0.4106					downregulated	2	3.30216	0.0368	downregulated	1	1.12759	0.3238	downregulated	4	6.31705	0.0018	downregulated	4	3.08432	0.0458	downregulated	2	2.82257	0.0595
regulation of heart morphogenesis	GO	5 out of 7	8.65034	upregulated	5	4.22725	0.0146	upregulated	1	0.695342	0.4989	upregulated	3	2.84545	0.0581	downregulated	2	2.12108	0.1199	downregulated	1	2.65114	0.0706	upregulated	3	1.10247	0.332	downregulated	2	1.45472	0.2335
respiratory chain complex I	GO	4 out of 7	8.63203	upregulated	3	1.59216	0.2035	downregulated	1	1.56139	0.2098									downregulated	1	1.25321	0.2856	downregulated	9	4.64289	0.0096	downregulated	5	2.70517	0.0669
amine binding	GO	4 out of 7	8.62269	upregulated	1	4.62313	0.0098													downregulated	1	0.962947	0.3818	downregulated	1	1.91082	0.148	downregulated	1	1.12579	0.3244
hormone binding	GO	5 out of 7	8.62268	upregulated	2	2.18159	0.1129	upregulated	2	2.16227	0.1151	upregulated	5	3.75172	0.0235	upregulated	4	6.44646	0.0016	upregulated	7	4.14903	0.0158	downregulated	6	4.55234	0.0105	upregulated	8	6.32268	0.0018
ligase activity, forming carbon-nitrogen bonds	GO	4 out of 7	8.62256	downregulated	1	0.398659	0.6712	upregulated	4	2.98091	0.0507	upregulated	3	2.77131	0.0626	downregulated	2	2.62612	0.0724	downregulated	7	6.29545	0.0018	downregulated	7	2.04085	0.1299	upregulated	2	2.44117	0.0871
positive regulation of anion transport	GO	4 out of 7	8.62117	upregulated	3	1.14051	0.3197	upregulated	3	1.50695	0.2216	downregulated	4	3.13943	0.0433	downregulated	3	3.47825	0.0309	upregulated	2	3.20745	0.0405	downregulated	7	6.6377	0.0013	downregulated	6	5.95369	0.0026
glutathione derivative biosynthetic process	GO	6 out of 7	8.56349	upregulated	2	2.62671	0.0723	upregulated	1	0.944496	0.3889					upregulated	1	2.17699	0.1134	downregulated	1	1.37581	0.2526	downregulated	2	0.871265	0.4184	downregulated	2	0.568224	0.5665
lymphocyte migration	GO	4 out of 7	8.553	downregulated	2	1.66779	0.1887	upregulated	1	1.19732	0.302					downregulated	1	0.900152	0.4065	downregulated	1	3.6097	0.0271	downregulated	2	3.15696	0.0426	downregulated	2	3.15696	0.0426
ER overload response	GO	4 out of 7	8.50464	upregulated	1	0.854083	0.4257	upregulated	2	2.71787	0.066	upregulated	1	2.72444	0.0656	downregulated	1	1.16589	0.3116	downregulated	3	3.37414	0.0342	downregulated	1	1.45301	0.2339	downregulated	1	1.81035	0.1636
maintenance of cell polarity	GO	3 out of 7	8.48678									downregulated	2	3.79041	0.0226	upregulated	1	4.14385	0.0159	downregulated	3	4.66391	0.0094	downregulated	2	3.43663	0.0322	downregulated	2	4.17666	0.0153
actin filament bundle	GO	5 out of 7	8.47646	upregulated	3	0.809917	0.4449	upregulated	6	5.9551	0.0026	upregulated	3	3.47305	0.031	upregulated	1	2.71399	0.0663	downregulated	3	1.16093	0.3132	upregulated	3	1.10104	0.3325	upregulated	8	4.53548	0.0107
acylglycerol metabolic process	GO	3 out of 7	8.43755	downregulated	2	5.00162	0.0067	upregulated	4	2.68322	0.0683	upregulated	7	6.85427	0.0011	downregulated	4	3.2913	0.0372	downregulated	10	7.19298	0.0008	upregulated	6	3.34854	0.0351	upregulated	9	4.00365	0.0182
G-protein coupled serotonin receptor signaling pathway	GO	5 out of 7	8.43321	upregulated	1	3.75677	0.0234	downregulated	1	2.93877	0.0529	upregulated	2	5.54917	0.0039					downregulated	1	0.351287	0.7038	downregulated	1	1.18706	0.3051	downregulated	1	0.527702	0.59
proteasome regulatory particle, base subcomplex	GO	4 out of 7	8.34732					upregulated	1	1.87662	0.1531									downregulated	2	2.55588	0.0776	downregulated	3	2.3625	0.0942	downregulated	2	1.55232	0.2118
phosphatidylglycerol acyl-chain remodeling	GO	5 out of 7	8.33535	upregulated	1	0.834992	0.4339	downregulated	1	1.37323	0.2533	upregulated	1	1.86356	0.1551					downregulated	2	1.40701	0.2449	downregulated	3	3.68628	0.0251	downregulated	2	1.91673	0.1471
organ growth	GO	5 out of 7	8.29958	downregulated	7	3.89353	0.0204	upregulated	1	0.224474	0.7989	upregulated	8	4.22149	0.0147	upregulated	3	5.48406	0.0042	downregulated	5	2.6217	0.0727	downregulated	11	1.01359	0.3629	upregulated	7	1.3722	0.2535
cellular modified amino acid catabolic process	GO	5 out of 7	8.29614					upregulated	2	1.93163	0.1449	upregulated	1	2.51252	0.0811					downregulated	3	1.78889	0.1671	downregulated	2	0.628305	0.5335	downregulated	3	1.43479	0.2382
lymph vessel morphogenesis	GO	4 out of 7	8.29334	downregulated	2	5.19265	0.0056	downregulated	2	2.75498	0.0636	upregulated	2	4.84304	0.0079					downregulated	1	2.39163	0.0915	downregulated	3	3.50231	0.0301	downregulated	3	5.50397	0.0041
response to epinephrine	GO	4 out of 7	8.23745	upregulated	1	1.13216	0.3223	downregulated	1	4.71073	0.009	downregulated	1	1.07359	0.3418					downregulated	4	5.61106	0.0037	downregulated	4	3.51545	0.0297	downregulated	4	3.76309	0.0232
mitochondrial outer membrane	GO	1 out of 7	8.22364	downregulated	4	0.988315	0.3722	upregulated	7	3.0555	0.0471	downregulated	11	4.8292	0.008	downregulated	7	2.41123	0.0897	downregulated	17	8.22364	0.0003	downregulated	39	13.5175	1.3e-06	downregulated	33	14.6426	4.4e-07
cellular response to toxic substance	GO	4 out of 7	8.20527	downregulated	8	5.19253	0.0056	upregulated	13	6.62204	0.0013	downregulated	19	7.17982	0.0008	downregulated	12	6.07794	0.0023	downregulated	18	11.275	1.3e-05	downregulated	17	4.72361	0.0089	downregulated	13	4.03491	0.0177
cellular response to epinephrine stimulus	GO	4 out of 7	8.15063	upregulated	1	1.25093	0.2862	downregulated	1	4.91757	0.0073	downregulated	1	1.19067	0.304					downregulated	3	4.46695	0.0115	downregulated	4	4.12466	0.0162	downregulated	4	4.41631	0.0121
G-protein coupled peptide receptor activity	GO	4 out of 7	8.13584	upregulated	3	5.27374	0.0051	upregulated	4	6.18352	0.0021	downregulated	6	4.43962	0.0118	downregulated	3	3.64096	0.0262	upregulated	2	3.60491	0.0272	downregulated	5	4.50049	0.0111	downregulated	5	3.86357	0.021
regulation of viral life cycle	GO	4 out of 7	8.13163	downregulated	6	2.05323	0.1283	upregulated	11	8.79286	0.0002	downregulated	5	1.18592	0.3055	downregulated	1	0.731881	0.481	downregulated	9	0.843412	0.4302	downregulated	15	1.38985	0.2491	downregulated	14	1.07654	0.3408
small nuclear ribonucleoprotein complex	GO	5 out of 7	8.12732	upregulated	2	2.03978	0.1301	upregulated	7	7.9803	0.0003	upregulated	2	2.61438	0.0732	upregulated	1	0.897079	0.4078	upregulated	8	3.33236	0.0357	downregulated	7	0.847916	0.4283	upregulated	10	6.25213	0.0019
cyclin binding	GO	6 out of 7	8.07982	upregulated	2	1.38623	0.25	downregulated	2	2.4621	0.0853	upregulated	2	1.16517	0.3119	upregulated	1	1.81494	0.1628	downregulated	2	1.12498	0.3247	downregulated	4	2.69752	0.0674	downregulated	5	2.35307	0.0951
phosphotransferase activity, phosphate group as acceptor	GO	4 out of 7	8.05913	upregulated	3	3.17125	0.042					downregulated	3	2.23459	0.107	downregulated	1	1.74539	0.1746	downregulated	2	1.88176	0.1523	downregulated	7	2.85706	0.0574	downregulated	7	4.12904	0.0161
CENP-A containing chromatin organization	GO	2 out of 7	8.04899	upregulated	3	2.33389	0.0969	upregulated	7	9.79667	5.6e-05	upregulated	2	1.8396	0.1589	downregulated	2	2.0697	0.1262	upregulated	2	0.616738	0.5397					upregulated	1	1.39513	0.2478
arginine metabolic process	GO	2 out of 7	8.0272									upregulated	1	1.90991	0.1481					downregulated	3	6.11729	0.0022	downregulated	4	2.57626	0.0761	upregulated	1	0.882039	0.4139
positive regulation of acrosome reaction	GO	4 out of 7	7.88764													upregulated	1	2.694	0.0676	downregulated	1	1.14165	0.3193	downregulated	1	2.60068	0.0742	downregulated	1	1.4513	0.2343
proton-transporting two-sector ATPase complex, proton-transporting domain	GO	4 out of 7	7.87542	upregulated	1	1.78753	0.1674	upregulated	1	2.68548	0.0682	upregulated	1	2.72833	0.0653					downregulated	2	3.92502	0.0197	downregulated	4	5.05319	0.0064	upregulated	2	3.25094	0.0387
transcription factor activity, RNA polymerase II core promoter sequence-specific DNA binding	GO	4 out of 7	7.86942	upregulated	4	4.53744	0.0107	upregulated	1	3.46996	0.0311	upregulated	1	1.43399	0.2384	upregulated	1	4.73175	0.0088	upregulated	4	3.22002	0.04	upregulated	2	1.73873	0.1757	upregulated	2	1.34496	0.2605
cerebellar cortex morphogenesis	GO	4 out of 7	7.83965					upregulated	1	0.847814	0.4284	downregulated	3	2.33949	0.0964	downregulated	1	0.805845	0.4467	downregulated	4	3.61783	0.0268	downregulated	6	3.51493	0.0297	downregulated	7	3.00441	0.0496
stem cell development	GO	5 out of 7	7.72872	upregulated	5	1.71834	0.1794	upregulated	3	3.64252	0.0262	downregulated	12	10.954	1.7e-05	downregulated	3	0.925866	0.3962	downregulated	6	3.69777	0.0248	downregulated	11	4.87611	0.0076	downregulated	9	5.67383	0.0034
learned vocalization behavior or vocal learning	GO	3 out of 7	7.72844	upregulated	1	2.94037	0.0528					downregulated	1	0.572528	0.5641					upregulated	1	0.621501	0.5371	downregulated	3	3.16099	0.0424	downregulated	1	2.8211	0.0595
glycerol ether metabolic process	GO	3 out of 7	7.6859	downregulated	1	1.82736	0.1608	upregulated	2	5.23617	0.0053	upregulated	1	2.33684	0.0966					downregulated	1	1.94025	0.1437	downregulated	5	6.98745	0.0009	downregulated	3	3.4053	0.0332
establishment or maintenance of apical/basal cell polarity	GO	4 out of 7	7.66436	upregulated	2	0.840449	0.4315	downregulated	2	3.79299	0.0225	downregulated	2	0.799609	0.4495	upregulated	1	2.96545	0.0515	downregulated	3	4.24236	0.0144	downregulated	4	4.20869	0.0149	downregulated	6	3.91376	0.02
inner ear receptor cell development	GO	4 out of 7	7.6414	upregulated	2	0.78078	0.458	downregulated	1	1.31092	0.2696	downregulated	4	1.37577	0.2526					downregulated	4	5.63487	0.0036	downregulated	4	1.98303	0.1377	downregulated	3	1.9294	0.1452
regulation of delayed rectifier potassium channel activity	GO	3 out of 7	7.59524	upregulated	2	2.47924	0.0838																	downregulated	2	1.93494	0.1444	downregulated	4	3.18106	0.0415
nuclear envelope	GO	1 out of 7	7.5952	upregulated	29	3.07776	0.0461	upregulated	21	2.80842	0.0603	downregulated	37	6.06532	0.0023	downregulated	27	6.45673	0.0016	downregulated	45	7.5952	0.0005	downregulated	64	4.7401	0.0087	downregulated	59	8.9601	0.0001
retinal binding	GO	5 out of 7	7.57762	upregulated	1	2.40486	0.0903					upregulated	1	1.71244	0.1804	upregulated	1	2.34984	0.0954	downregulated	1	1.4564	0.2331	upregulated	1	0.897216	0.4077	downregulated	1	0.5513	0.5762
phosphatidylglycerol binding	GO	3 out of 7	7.57594	upregulated	1	1.33048	0.2644													downregulated	1	2.17145	0.114	downregulated	3	4.07401	0.017	upregulated	3	2.95921	0.0519
metallopeptidase activity	GO	4 out of 7	7.56673	upregulated	6	0.721221	0.4862	downregulated	3	0.729429	0.4822	upregulated	7	4.3525	0.0129	downregulated	9	2.99473	0.05	downregulated	16	5.78075	0.0031	upregulated	6	0.683495	0.5048	downregulated	14	1.11992	0.3263
acetylcholine receptor signaling pathway	GO	4 out of 7	7.48925									upregulated	1	4.92959	0.0072	downregulated	1	3.83811	0.0215	downregulated	4	2.11596	0.1205	downregulated	4	2.8828	0.056	downregulated	4	1.39901	0.2468
response to acetylcholine	GO	4 out of 7	7.48925									upregulated	1	4.92959	0.0072	downregulated	1	3.83811	0.0215	downregulated	4	2.11596	0.1205	downregulated	4	2.8828	0.056	downregulated	4	1.39901	0.2468
negative regulation of locomotion	GO	4 out of 7	7.47577	upregulated	20	6.04008	0.0024	upregulated	11	4.08111	0.0169	downregulated	31	6.43064	0.0016	downregulated	15	5.40643	0.0045	downregulated	31	9.09799	0.0001	downregulated	44	4.55712	0.0105	upregulated	30	4.46345	0.0115
cerebellum morphogenesis	GO	4 out of 7	7.46104					upregulated	1	0.700765	0.4962	downregulated	4	2.65211	0.0705	downregulated	1	0.698636	0.4973	downregulated	4	3.01954	0.0488	downregulated	7	3.9176	0.0199	downregulated	8	3.17387	0.0418
regulation of endocytosis	GO	5 out of 7	7.45948	upregulated	12	1.69317	0.1839	upregulated	9	2.87494	0.0564	downregulated	25	9.86619	5.2e-05	downregulated	19	13.3627	1.6e-06	downregulated	24	7.98651	0.0003	downregulated	37	9.78796	5.6e-05	downregulated	30	8.34581	0.0002
axoneme	GO	1 out of 7	7.45636	upregulated	8	2.97849	0.0509	downregulated	1	0.10522	0.9001	downregulated	1	1.48897	0.2256	upregulated	2	1.58623	0.2047	downregulated	15	7.45636	0.0006	downregulated	16	2.39146	0.0915	downregulated	12	1.67112	0.188
actin filament	GO	1 out of 7	7.45482	upregulated	5	2.239	0.1066	upregulated	4	0.745661	0.4744	downregulated	6	1.12969	0.3231	downregulated	4	1.40488	0.2454	downregulated	12	7.45482	0.0006	upregulated	11	4.10083	0.0166	upregulated	14	8.62883	0.0002
retrograde vesicle-mediated transport, Golgi to ER	GO	4 out of 7	7.39956	upregulated	1	0.207417	0.8127	upregulated	5	1.88515	0.1518	upregulated	2	0.486715	0.6146	downregulated	4	1.31806	0.2677	downregulated	12	6.13834	0.0022	downregulated	17	6.05947	0.0023	downregulated	16	6.15499	0.0021
ruffle assembly	GO	5 out of 7	7.393	upregulated	1	1.95865	0.141	upregulated	1	1.57393	0.2072	downregulated	1	0.543173	0.5809	downregulated	1	1.37977	0.2516	downregulated	1	0.613366	0.5415	downregulated	2	2.3719	0.0933	downregulated	2	2.7981	0.0609
negative regulation of protein acetylation	GO	4 out of 7	7.38654	downregulated	1	3.26551	0.0382					upregulated	1	1.91042	0.148	downregulated	1	0.507299	0.6021	downregulated	3	2.96448	0.0516	downregulated	3	3.25523	0.0386	downregulated	4	3.02923	0.0484
positive regulation of stem cell differentiation	GO	6 out of 7	7.31087	upregulated	2	2.68547	0.0682	upregulated	1	0.600322	0.5486	upregulated	1	0.947414	0.3877					downregulated	1	0.840066	0.4317	downregulated	2	0.744234	0.4751	downregulated	3	1.49336	0.2246
cellular response to forskolin	GO	4 out of 7	7.24598									upregulated	1	3.53374	0.0292	upregulated	1	2.24979	0.1054					downregulated	2	1.23997	0.2894	downregulated	1	0.222487	0.8005
ubiquitin-like modifier activating enzyme activity	GO	3 out of 7	7.24443					downregulated	1	1.60867	0.2002									downregulated	3	5.25107	0.0052	downregulated	2	1.07033	0.3429	downregulated	2	2.53171	0.0795
ESCRT complex disassembly	GO	4 out of 7	7.22222					upregulated	1	1.40026	0.2465					downregulated	1	1.51241	0.2204	downregulated	2	2.62672	0.0723	downregulated	2	3.11876	0.0442	downregulated	2	1.58889	0.2042
ESCRT III complex disassembly	GO	4 out of 7	7.22222					upregulated	1	1.40026	0.2465					downregulated	1	1.51241	0.2204	downregulated	2	2.62672	0.0723	downregulated	2	3.11876	0.0442	downregulated	2	1.58889	0.2042
reflex	GO	3 out of 7	7.21058					downregulated	1	1.2602	0.2836	downregulated	1	0.260223	0.7709					downregulated	2	2.7578	0.0634	downregulated	3	3.68088	0.0252	downregulated	3	2.29232	0.101
multicellular organismal movement	GO	4 out of 7	7.19176	downregulated	3	5.28185	0.0051	downregulated	1	1.22866	0.2927	upregulated	2	2.08713	0.124	upregulated	2	4.5843	0.0102	upregulated	3	0.33622	0.7145	downregulated	6	3.31327	0.0364	downregulated	5	4.0538	0.0174
musculoskeletal movement	GO	4 out of 7	7.19176	downregulated	3	5.28185	0.0051	downregulated	1	1.22866	0.2927	upregulated	2	2.08713	0.124	upregulated	2	4.5843	0.0102	upregulated	3	0.33622	0.7145	downregulated	6	3.31327	0.0364	downregulated	5	4.0538	0.0174
GTPase regulator activity	GO	3 out of 7	7.15198	upregulated	17	3.53143	0.0293	downregulated	5	0.394528	0.674	downregulated	33	6.40143	0.0017	downregulated	22	8.82888	0.0001	upregulated	45	6.50585	0.0015	downregulated	55	12.1505	5.3e-06	downregulated	49	13.6007	1.2e-06
spliceosomal snRNP complex	GO	4 out of 7	7.13004	upregulated	2	2.14862	0.1166	upregulated	7	8.73728	0.0002	upregulated	2	2.82392	0.0594	downregulated	1	0.173156	0.841	upregulated	8	3.95793	0.0191	downregulated	5	0.799388	0.4496	upregulated	10	7.20601	0.0007
positive regulation of sodium ion transmembrane transporter activity	GO	4 out of 7	7.12767	upregulated	1	1.19539	0.3026					upregulated	1	2.56391	0.077	downregulated	1	1.01348	0.363					downregulated	3	1.93364	0.1446	downregulated	3	2.4482	0.0864
divalent inorganic cation transmembrane transporter activity	GO	4 out of 7	7.11551	upregulated	2	2.71531	0.0662	upregulated	1	3.96607	0.0189	downregulated	1	0.237517	0.7886					upregulated	2	1.13886	0.3202	downregulated	1	0.689179	0.502	downregulated	1	1.12132	0.3258
cell leading edge	GO	3 out of 7	7.11346	downregulated	13	3.7926	0.0225	downregulated	10	1.72074	0.1789	downregulated	43	8.58684	0.0002	downregulated	28	9.65505	6.4e-05	downregulated	32	6.68807	0.0012	downregulated	56	10.8808	1.9e-05	downregulated	50	13.2998	1.7e-06
inner ear development	GO	4 out of 7	7.07612	upregulated	9	3.29324	0.0371	downregulated	4	2.58334	0.0755	downregulated	10	3.269	0.038	downregulated	4	2.63094	0.072	downregulated	13	4.10142	0.0165	downregulated	19	3.32534	0.036	downregulated	12	4.83941	0.0079
regulation of TORC1 signaling	GO	4 out of 7	7.07428	upregulated	3	4.90055	0.0074	upregulated	3	5.60003	0.0037	upregulated	1	1.2601	0.2836	downregulated	4	5.1257	0.0059	upregulated	5	2.14112	0.1175	downregulated	4	1.90722	0.1485	downregulated	5	1.9333	0.1447
HOPS complex	GO	4 out of 7	7.06089	upregulated	1	2.66456	0.0696					downregulated	1	0.503328	0.6045	upregulated	1	2.46101	0.0853					downregulated	2	1.41064	0.244	downregulated	2	1.028	0.3577
mitochondrial outer membrane permeabilization involved in programmed cell death	GO	4 out of 7	7.04044	downregulated	1	1.30306	0.2717									upregulated	1	2.92543	0.0536	downregulated	2	1.69032	0.1845	downregulated	4	1.69323	0.1839	downregulated	2	2.03452	0.1307
muscle cell differentiation	GO	4 out of 7	6.99925	upregulated	13	5.45937	0.0043	upregulated	7	2.13058	0.1188	downregulated	18	3.07477	0.0462	upregulated	5	4.27192	0.014	upregulated	18	1.99014	0.1367	upregulated	14	2.73943	0.0646	downregulated	22	2.9417	0.0528
Flemming body	GO	5 out of 7	6.97046	upregulated	3	2.72405	0.0656	upregulated	3	3.1425	0.0432	downregulated	2	1.41725	0.2424	downregulated	2	1.89468	0.1504	downregulated	2	2.10486	0.1219	downregulated	3	1.21842	0.2957	downregulated	3	1.09256	0.3354
cellular response to peptide	GO	3 out of 7	6.93483	downregulated	7	3.53761	0.0291	upregulated	12	6.92718	0.001	downregulated	20	4.12628	0.0161	downregulated	16	3.56048	0.0284	downregulated	16	6.09805	0.0022	downregulated	36	5.31526	0.0049	downregulated	37	5.91676	0.0027
homologous chromosome segregation	GO	6 out of 7	6.89392	upregulated	2	0.906329	0.404	upregulated	5	3.75629	0.0234	upregulated	1	1.29484	0.2739	downregulated	1	0.236587	0.7893	downregulated	2	1.05807	0.3471	downregulated	2	0.0538569	0.9476	downregulated	2	0.0611221	0.9407
autophagy	GO	3 out of 7	6.88274	upregulated	9	1.0757	0.3411	upregulated	13	1.93737	0.1441	downregulated	22	6.56776	0.0014	downregulated	10	2.49392	0.0826	downregulated	31	12.9313	2.4e-06	downregulated	36	6.64078	0.0013	downregulated	38	9.78628	5.6e-05
diacylglycerol binding	GO	2 out of 7	6.87699	upregulated	2	5.5267	0.004					downregulated	1	1.66595	0.189					downregulated	1	6.21893	0.002	upregulated	1	1.86428	0.155	upregulated	1	1.33841	0.2623
RNA polymerase II, holoenzyme	GO	4 out of 7	6.86981	upregulated	4	1.25269	0.2857	upregulated	5	2.47839	0.0839	downregulated	7	1.18539	0.3056	upregulated	1	3.72028	0.0242	downregulated	7	3.17332	0.0419	upregulated	3	0.527009	0.5904	upregulated	8	2.04246	0.1297
sequence-specific mRNA binding	GO	4 out of 7	6.85172	upregulated	1	1.57342	0.2073	upregulated	2	6.30588	0.0018	upregulated	1	1.45424	0.2336	downregulated	1	1.351	0.259	downregulated	2	3.73256	0.0239	downregulated	1	0.428343	0.6516	upregulated	2	1.55916	0.2103
selective autophagy	GO	4 out of 7	6.84592	upregulated	1	0.561658	0.5703					upregulated	1	4.52591	0.0108	downregulated	2	1.38756	0.2497	downregulated	2	2.09067	0.1236	upregulated	2	2.52192	0.0803	downregulated	4	3.57716	0.028
mitochondrial transport	GO	2 out of 7	6.82842	downregulated	5	0.822797	0.4392	downregulated	3	0.704532	0.4943	downregulated	11	2.23976	0.1065	upregulated	1	0.909094	0.4029	downregulated	21	9.68641	6.2e-05	downregulated	41	19.9645	2.1e-09	downregulated	33	18.9181	6.1e-09
regulation of neuron migration	GO	3 out of 7	6.80651	upregulated	3	3.53828	0.0291					downregulated	4	2.75798	0.0634	downregulated	1	0.600528	0.5485	upregulated	4	4.00043	0.0183	downregulated	8	5.79692	0.003	downregulated	8	4.83024	0.008
regulation of microtubule motor activity	GO	3 out of 7	6.78302	upregulated	1	2.04237	0.1297					downregulated	1	3.11745	0.0443	downregulated	1	3.0683	0.0465	downregulated	3	4.67708	0.0093	upregulated	1	2.69227	0.0677	downregulated	4	6.24931	0.0019
cysteine-type endopeptidase inhibitor activity involved in apoptotic process	GO	4 out of 7	6.7696	upregulated	2	1.10745	0.3304					downregulated	1	0.819556	0.4406	downregulated	2	1.96068	0.1408	downregulated	1	1.88682	0.1516	downregulated	5	3.60871	0.0271	downregulated	2	2.94685	0.0525
regulation of non-motile cilium assembly	GO	4 out of 7	6.76679	upregulated	1	3.21338	0.0402	downregulated	1	1.30306	0.2717	downregulated	3	2.65854	0.0701	downregulated	2	2.10173	0.1222	downregulated	2	3.04031	0.0478	downregulated	3	3.17404	0.0418	downregulated	3	3.40238	0.0333
ketone body metabolic process	GO	2 out of 7	6.76104																	upregulated	1	2.10071	0.1224	downregulated	4	4.41683	0.0121	downregulated	3	4.44492	0.0117
Wnt-protein binding	GO	4 out of 7	6.73706	upregulated	2	3.9656	0.019					upregulated	1	1.31438	0.2686	upregulated	1	3.49592	0.0303	upregulated	3	3.0119	0.0492	downregulated	3	1.59031	0.2039	upregulated	2	0.617258	0.5394
regulation of IRE1-mediated unfolded protein response	GO	3 out of 7	6.69009									upregulated	2	3.54792	0.0288					upregulated	1	1.60566	0.2008	downregulated	3	3.00984	0.0493	downregulated	2	1.73799	0.1759
postsynaptic membrane assembly	GO	3 out of 7	6.65989	upregulated	2	4.34383	0.013					upregulated	1	1.96962	0.1395					upregulated	2	1.87668	0.1531	downregulated	2	2.22312	0.1083	upregulated	2	2.77173	0.0626
cellular response to virus	GO	4 out of 7	6.60743	downregulated	1	1.01151	0.3637	upregulated	2	2.03579	0.1306	upregulated	1	4.51094	0.011	downregulated	1	0.446955	0.6396	downregulated	3	2.51875	0.0806	downregulated	3	0.859997	0.4232	upregulated	4	1.85958	0.1557
racemase and epimerase activity	GO	3 out of 7	6.57907	upregulated	2	2.39788	0.0909	upregulated	2	3.2905	0.0372									downregulated	1	1.36413	0.2556	upregulated	1	0.473438	0.6229	downregulated	1	0.453793	0.6352
ATP-dependent microtubule motor activity, plus-end-directed	GO	3 out of 7	6.56921					upregulated	1	1.74748	0.1742	downregulated	2	0.719213	0.4871	downregulated	1	0.710085	0.4916	downregulated	1	0.453321	0.6355	downregulated	2	2.16873	0.1143	downregulated	3	4.08229	0.0169
regulation of ceramide biosynthetic process	GO	4 out of 7	6.49594					upregulated	1	0.952224	0.3859	upregulated	1	2.11476	0.1207	downregulated	1	1.24194	0.2888	downregulated	4	5.29413	0.005	downregulated	1	0.205735	0.814	upregulated	1	0.828967	0.4365
isoprenoid metabolic process	GO	2 out of 7	6.48431	downregulated	1	1.25428	0.2853	upregulated	8	5.67352	0.0034	downregulated	4	3.09501	0.0453	downregulated	4	1.88938	0.1512	downregulated	14	7.04946	0.0009	downregulated	19	7.11907	0.0008	downregulated	19	7.2771	0.0007
motile cilium assembly	GO	6 out of 7	6.48254	upregulated	1	0.584454	0.5574					upregulated	1	1.16088	0.3132	upregulated	1	1.93216	0.1448	downregulated	2	1.04695	0.351	downregulated	2	1.16602	0.3116	downregulated	1	0.592074	0.5532
positive regulation of mitochondrial membrane permeability	GO	4 out of 7	6.39619	downregulated	1	1.20197	0.3006									upregulated	1	2.80872	0.0603	downregulated	2	1.5098	0.221	downregulated	4	1.42533	0.2404	downregulated	2	1.85432	0.1566
hindbrain morphogenesis	GO	4 out of 7	6.3778					upregulated	1	0.64862	0.5228	downregulated	4	2.34636	0.0957	downregulated	1	0.62516	0.5352	downregulated	4	2.68907	0.0679	downregulated	7	3.37785	0.0341	downregulated	8	2.63377	0.0718
nitrogen cycle metabolic process	GO	3 out of 7	6.34996																	downregulated	2	4.38001	0.0125	downregulated	2	1.24917	0.2867	downregulated	1	0.720786	0.4864
MKS complex	GO	3 out of 7	6.34586	upregulated	4	5.68424	0.0034	downregulated	1	2.39737	0.091					upregulated	1	2.17699	0.1134	downregulated	2	1.80066	0.1652	upregulated	1	0.918659	0.3991
glutathione metabolic process	GO	4 out of 7	6.33951	upregulated	1	0.685731	0.5037	upregulated	1	1.17719	0.3081	upregulated	1	1.80838	0.1639					downregulated	4	2.66821	0.0694	downregulated	6	3.02225	0.0487	upregulated	1	1.0036	0.3666
lipid storage	GO	5 out of 7	6.32416	upregulated	1	1.6055	0.2008	upregulated	3	2.79227	0.0613	upregulated	1	2.14879	0.1166	downregulated	2	1.68887	0.1847	upregulated	3	1.00774	0.365	downregulated	2	1.40945	0.2443	downregulated	4	1.06476	0.3448
bone remodeling	GO	5 out of 7	6.30758	downregulated	1	0.558759	0.5719	upregulated	1	0.729259	0.4823	upregulated	1	1.26297	0.2828	downregulated	1	0.791785	0.453	downregulated	2	1.48843	0.2257	downregulated	3	3.12391	0.044	downregulated	4	1.05355	0.3487
peptide hormone binding	GO	5 out of 7	6.28169	upregulated	2	2.83339	0.0588	upregulated	2	2.9996	0.0498	upregulated	3	2.07625	0.1254	upregulated	3	6.17398	0.0021	upregulated	2	1.79853	0.1655	downregulated	1	1.5752	0.207	upregulated	5	7.5782	0.0005
regulation of microtubule binding	GO	3 out of 7	6.24569	upregulated	2	3.79393	0.0225					downregulated	1	0.879127	0.4151					downregulated	2	2.22515	0.1081	downregulated	1	1.10575	0.331	downregulated	3	3.44097	0.032
female gamete generation	GO	2 out of 7	6.22681	downregulated	3	0.805043	0.4471	downregulated	1	0.188159	0.8285	upregulated	2	4.70372	0.0091	upregulated	1	3.46225	0.0314	upregulated	8	0.945949	0.3883	upregulated	5	2.20138	0.1106	upregulated	9	2.48919	0.083
nuclear chromosome segregation	GO	5 out of 7	6.21294	upregulated	12	1.97315	0.139	upregulated	16	7.85675	0.0004	upregulated	3	0.844514	0.4298	upregulated	1	0.237069	0.7889	upregulated	22	3.98997	0.0185	downregulated	20	0.60727	0.5448	upregulated	10	1.31584	0.2682
ER membrane protein complex	GO	4 out of 7	6.1899					upregulated	1	1.4387	0.2372	upregulated	1	1.49302	0.2247					downregulated	1	1.41545	0.2428					downregulated	2	1.84272	0.1584
positive regulation of fertilization	GO	4 out of 7	6.13932									downregulated	1	1.42455	0.2406	upregulated	1	2.60213	0.0741	downregulated	1	1.09225	0.3355	downregulated	1	2.48763	0.0831	downregulated	1	1.38186	0.2511
telomeric loop disassembly	GO	4 out of 7	6.13076	upregulated	1	1.55757	0.2106	upregulated	1	2.9461	0.0525									downregulated	1	1.06853	0.3435	downregulated	1	0.55857	0.572
regulation of body fluid levels	GO	3 out of 7	6.11388	downregulated	9	1.37075	0.2539	upregulated	19	9.45493	7.8e-05	downregulated	33	3.4715	0.0311	downregulated	23	4.18702	0.0152	downregulated	32	5.10611	0.0061	downregulated	45	5.36036	0.0047	upregulated	28	4.77824	0.0084
establishment or maintenance of epithelial cell apical/basal polarity	GO	4 out of 7	6.04419	upregulated	2	0.881423	0.4142	downregulated	2	3.847	0.0213	downregulated	2	0.88395	0.4131	upregulated	1	3.03599	0.048	downregulated	2	2.50751	0.0815	downregulated	4	4.3502	0.0129	downregulated	6	4.0538	0.0174
fluid transport	GO	4 out of 7	6.03878	upregulated	1	0.320292	0.7259	upregulated	1	3.37797	0.0341									downregulated	1	0.89197	0.4098	downregulated	4	5.62912	0.0036	upregulated	2	4.18058	0.0153
macromolecule depalmitoylation	GO	4 out of 7	6.03055	upregulated	2	3.1494	0.0429	upregulated	1	1.94202	0.1434	downregulated	2	3.7076	0.0245									downregulated	2	1.40786	0.2447	downregulated	3	3.23887	0.0392
palmitoyl hydrolase activity	GO	4 out of 7	6.03055	upregulated	2	3.1494	0.0429	upregulated	1	1.94202	0.1434	downregulated	2	3.7076	0.0245									downregulated	2	1.40786	0.2447	downregulated	3	3.23887	0.0392
Lys48-specific deubiquitinase activity	GO	4 out of 7	6.01506	downregulated	1	2.10946	0.1213	downregulated	1	1.3412	0.2615	upregulated	1	1.35964	0.2568	downregulated	1	1.87746	0.153	downregulated	4	4.56125	0.0104	downregulated	5	3.87073	0.0208	downregulated	4	1.55157	0.2119
AV node cell to bundle of His cell communication	GO	3 out of 7	5.98052	upregulated	1	2.98055	0.0508					upregulated	2	3.3446	0.0353	downregulated	1	2.77557	0.0623					downregulated	2	2.43094	0.088
ubiquitin-specific protease binding	GO	5 out of 7	5.97982	upregulated	1	0.898419	0.4072	upregulated	1	0.684635	0.5043	upregulated	1	1.41306	0.2434	upregulated	1	3.31433	0.0364	upregulated	2	0.736003	0.479	downregulated	3	1.47975	0.2277	upregulated	2	1.07436	0.3415
response to monoamine	GO	3 out of 7	5.96948	upregulated	3	3.04033	0.0478	downregulated	1	3.57121	0.0281	downregulated	3	1.26599	0.282	downregulated	1	0.396885	0.6724	downregulated	6	5.18283	0.0056	downregulated	6	2.95018	0.0523	downregulated	6	2.98041	0.0508
response to catecholamine	GO	3 out of 7	5.96948	upregulated	3	3.04033	0.0478	downregulated	1	3.57121	0.0281	downregulated	3	1.26599	0.282	downregulated	1	0.396885	0.6724	downregulated	6	5.18283	0.0056	downregulated	6	2.95018	0.0523	downregulated	6	2.98041	0.0508
locomotory exploration behavior	GO	4 out of 7	5.93286	upregulated	1	2.96771	0.0514	upregulated	1	1.10056	0.3327									upregulated	1	1.54658	0.213	downregulated	1	1.26634	0.2819	downregulated	3	2.14484	0.1171
antibiotic metabolic process	GO	3 out of 7	5.91319	downregulated	4	4.56499	0.0104	upregulated	3	0.996949	0.369	downregulated	9	3.35071	0.0351	downregulated	10	7.21905	0.0007	downregulated	14	10.5181	2.7e-05	downregulated	20	4.40163	0.0123	downregulated	20	6.12817	0.0022
polyol transport	GO	3 out of 7	5.87689	upregulated	3	5.1678	0.0057					downregulated	1	3.51201	0.0298					upregulated	2	5.85843	0.0029	downregulated	4	5.47667	0.0042	downregulated	3	4.60286	0.01
carbohydrate derivative catabolic process	GO	5 out of 7	5.86096	downregulated	4	0.851337	0.4268	upregulated	9	2.70049	0.0672	upregulated	4	1.26827	0.2813	downregulated	10	6.67535	0.0013	downregulated	14	3.32746	0.0359	downregulated	25	3.26915	0.038	downregulated	17	2.82229	0.0595
positive regulation of podosome assembly	GO	3 out of 7	5.85274					upregulated	1	2.83339	0.0588													downregulated	1	1.5222	0.2182	downregulated	1	1.49715	0.2238
monosaccharide transmembrane transport	GO	4 out of 7	5.79507	upregulated	1	2.21947	0.1087	downregulated	1	1.86069	0.1556	upregulated	1	1.41708	0.2424	downregulated	2	3.11637	0.0443	downregulated	3	2.31023	0.0992	downregulated	4	3.56779	0.0282	downregulated	5	3.56779	0.0282
retina vasculature development in camera-type eye	GO	5 out of 7	5.76659	downregulated	1	2.45893	0.0855	upregulated	1	1.30981	0.2699	upregulated	2	3.40423	0.0332					downregulated	1	1.69507	0.1836	downregulated	1	0.73434	0.4798	downregulated	1	1.08207	0.3389
receptor localization to synapse	GO	3 out of 7	5.73037	upregulated	4	2.71182	0.0664	downregulated	3	3.98166	0.0187	downregulated	2	1.26505	0.2822					upregulated	1	4.34707	0.0129	downregulated	6	4.71944	0.0089	downregulated	8	7.89288	0.0004
trans-Golgi network	GO	1 out of 7	5.71418	upregulated	9	4.59267	0.0101	upregulated	8	1.51281	0.2203	downregulated	29	18.5294	9e-09	downregulated	19	15.1259	2.7e-07	downregulated	23	5.71418	0.0033	downregulated	40	14.7871	3.8e-07	downregulated	36	17.2674	3.2e-08
muscle contraction	GO	3 out of 7	5.6818	upregulated	13	5.22716	0.0054	downregulated	4	2.07169	0.126	downregulated	14	3.138	0.0434	upregulated	3	2.55526	0.0777	downregulated	14	3.10907	0.0446	downregulated	32	9.75079	5.8e-05	downregulated	26	7.3807	0.0006
translation	GO	1 out of 7	5.67698	upregulated	15	0.251288	0.7778	upregulated	16	3.78873	0.0226	upregulated	13	1.37089	0.2539	upregulated	5	1.41957	0.2418	downregulated	27	5.67698	0.0034	upregulated	24	2.22445	0.1081	upregulated	58	28.7849	3.2e-13
regulation of actin polymerization or depolymerization	GO	5 out of 7	5.67571	upregulated	10	1.17062	0.3102	upregulated	8	2.37168	0.0933	downregulated	14	2.4148	0.0894	downregulated	8	5.46958	0.0042	downregulated	14	3.10172	0.045	downregulated	27	3.27408	0.0379	downregulated	25	3.64199	0.0262
oligosaccharyltransferase complex	GO	3 out of 7	5.63599	upregulated	1	4.19681	0.015	upregulated	1	1.63549	0.1949					downregulated	1	1.36651	0.255	upregulated	1	0.330532	0.7185	upregulated	1	0.903703	0.4051	downregulated	2	2.40444	0.0903
calmodulin binding	GO	1 out of 7	5.63234	upregulated	7	4.45174	0.0117	downregulated	2	1.66911	0.1884	downregulated	20	3.19693	0.0409	downregulated	10	3.38833	0.0338	downregulated	16	5.63234	0.0036	downregulated	33	18.6835	7.7e-09	downregulated	36	18.8397	6.6e-09
endocrine system development	GO	5 out of 7	5.56846	upregulated	4	1.23291	0.2914	downregulated	1	1.6224	0.1974	upregulated	3	1.77316	0.1698	upregulated	2	1.28402	0.2769	upregulated	10	3.62324	0.0267	downregulated	11	4.27883	0.0139	downregulated	9	2.24518	0.1059
actin filament bundle organization	GO	4 out of 7	5.52167	downregulated	1	1.45111	0.2343	upregulated	5	4.44805	0.0117	upregulated	2	0.951353	0.3862	upregulated	3	2.95589	0.052	downregulated	5	2.9371	0.053	upregulated	4	1.93144	0.1449	upregulated	6	2.38817	0.0918
tRNA 5'-end processing	GO	3 out of 7	5.51393	upregulated	1	1.41563	0.2428					upregulated	2	4.11542	0.0163	downregulated	1	1.12947	0.3232	upregulated	1	0.545126	0.5798	downregulated	2	1.65748	0.1906	upregulated	2	2.1951	0.1113
synapsis	GO	3 out of 7	5.50234	downregulated	1	0.604394	0.5464	upregulated	4	3.76881	0.0231	upregulated	1	1.45034	0.2345	downregulated	1	0.318186	0.7275	downregulated	2	1.20578	0.2995	downregulated	2	0.102867	0.9022	downregulated	2	0.105827	0.8996
regulation of lymphocyte chemotaxis	GO	4 out of 7	5.49986									upregulated	1	2.43634	0.0875	upregulated	1	2.04309	0.1296	downregulated	1	0.762889	0.4663	downregulated	1	0.640169	0.5272	upregulated	1	0.382625	0.6821
extracellular negative regulation of signal transduction	GO	4 out of 7	5.49594	downregulated	2	2.64439	0.071					upregulated	1	1.65899	0.1903					downregulated	2	1.44614	0.2355	downregulated	4	2.76503	0.063	downregulated	2	2.27017	0.1033
regulation of circadian sleep/wake cycle	GO	5 out of 7	5.47568	upregulated	1	1.05776	0.3472	upregulated	1	0.996537	0.3692	downregulated	1	1.05919	0.3467	downregulated	1	1.29004	0.2753	downregulated	2	2.23956	0.1065	downregulated	1	2.25006	0.1054	downregulated	2	1.28099	0.2778
peptidase inhibitor activity	GO	5 out of 7	5.46413	downregulated	5	2.50145	0.082	upregulated	4	2.39254	0.0914	upregulated	3	1.17768	0.308	upregulated	2	2.25722	0.1046	downregulated	4	1.11201	0.3289	downregulated	13	2.0728	0.1258	downregulated	8	1.21054	0.298
respiratory chain complex IV	GO	4 out of 7	5.44385					upregulated	1	1.03225	0.3562									downregulated	1	0.809118	0.4453	downregulated	2	1.13294	0.3221	downregulated	2	2.46953	0.0846
regulation of retrograde protein transport, ER to cytosol	GO	4 out of 7	5.41747	upregulated	2	3.28854	0.0373	upregulated	1	1.65514	0.1911	downregulated	1	0.484802	0.6158	downregulated	1	1.18975	0.3043	upregulated	2	1.55437	0.2113	downregulated	3	1.6183	0.1982	downregulated	3	2.08442	0.1244
regulation of mitochondrial membrane permeability involved in apoptotic process	GO	4 out of 7	5.37983	downregulated	1	1.21785	0.2959	upregulated	1	0.616279	0.54					upregulated	1	2.82719	0.0592	upregulated	2	1.1866	0.3053	downregulated	5	2.38146	0.0924	downregulated	3	1.95935	0.1409
cellular response to catecholamine stimulus	GO	3 out of 7	5.3594	upregulated	3	3.20331	0.0406	downregulated	1	3.69315	0.0249	downregulated	3	1.38596	0.2501	downregulated	1	0.433549	0.6482	downregulated	5	4.32587	0.0132	downregulated	6	3.26413	0.0382	downregulated	6	3.34287	0.0353
ATPase complex	GO	4 out of 7	5.35921	upregulated	5	0.981017	0.3749	upregulated	5	2.27508	0.1028	downregulated	9	0.943842	0.3891	downregulated	2	0.435458	0.647	downregulated	7	1.7316	0.177	downregulated	13	3.51748	0.0297	upregulated	9	1.76667	0.1709
acetylcholine receptor activity	GO	2 out of 7	5.32894																	downregulated	3	4.06141	0.0172	upregulated	1	0.671293	0.511	downregulated	2	1.93883	0.1439
Gemini of coiled bodies	GO	3 out of 7	5.2959	upregulated	2	2.32916	0.0974	upregulated	2	3.05651	0.0471									upregulated	1	0.368375	0.6919	downregulated	1	0.278608	0.7568
co-receptor binding	GO	3 out of 7	5.28334									downregulated	1	1.08404	0.3382	upregulated	1	3.25039	0.0388	downregulated	1	0.433023	0.6485	upregulated	2	2.31745	0.0985	downregulated	1	1.59992	0.2019
reactive nitrogen species metabolic process	GO	3 out of 7	5.2783									upregulated	2	3.21241	0.0403	downregulated	1	3.44137	0.032	downregulated	2	4.53955	0.0107	downregulated	2	3.34064	0.0354	downregulated	1	2.16662	0.1146
autophagosome organization	GO	5 out of 7	5.2604	upregulated	2	0.519569	0.5948	upregulated	1	0.187551	0.829	downregulated	9	7.4196	0.0006	downregulated	4	1.62751	0.1964	downregulated	8	6.64021	0.0013	downregulated	8	1.70122	0.1825	downregulated	11	5.25896	0.0052
negative regulation of calcineurin-mediated signaling	GO	4 out of 7	5.24436									upregulated	1	1.65408	0.1913					downregulated	1	0.622337	0.5367	downregulated	1	1.30897	0.2701	downregulated	1	1.65897	0.1903
regulation of telomere capping	GO	5 out of 7	5.17191	upregulated	2	2.48933	0.083	upregulated	1	1.19592	0.3024	downregulated	2	2.38334	0.0922	downregulated	1	2.02163	0.1324	downregulated	2	1.02523	0.3587	downregulated	5	2.10857	0.1214	downregulated	5	2.75782	0.0634
peroxisome	GO	1 out of 7	5.13412	upregulated	9	3.08068	0.0459	upregulated	8	3.2511	0.0387	upregulated	10	5.9138	0.0027	downregulated	3	0.7916	0.4531	downregulated	15	5.13412	0.0059	downregulated	28	11.5643	9.5e-06	downregulated	22	9.83269	5.4e-05
post-anal tail morphogenesis	GO	3 out of 7	5.1308	upregulated	3	4.88414	0.0076					downregulated	1	0.396243	0.6728					downregulated	1	0.705198	0.494	downregulated	1	0.217587	0.8045	upregulated	1	0.279884	0.7559
protein insertion into membrane	GO	2 out of 7	5.13068	downregulated	2	2.46942	0.0846					downregulated	1	0.712202	0.4906	downregulated	1	0.749606	0.4726	upregulated	1	1.12559	0.3245	downregulated	3	3.70554	0.0246	downregulated	2	4.01254	0.0181
lysosomal transport	GO	3 out of 7	5.11314	upregulated	7	3.66588	0.0256	upregulated	6	2.19684	0.1112	upregulated	5	3.89314	0.0204	downregulated	7	5.07146	0.0063	downregulated	11	4.09462	0.0167	upregulated	7	4.78528	0.0084	upregulated	7	4.08635	0.0168
positive regulation of protein insertion into mitochondrial membrane involved in apoptotic signaling pathway	GO	4 out of 7	5.10585	downregulated	2	1.8526	0.1568	downregulated	1	1.3178	0.2677	upregulated	2	1.62611	0.1967	downregulated	1	0.642298	0.5261	downregulated	1	0.443863	0.6416	downregulated	4	2.81237	0.0601	downregulated	4	4.0362	0.0177
cleavage furrow	GO	4 out of 7	5.03691	upregulated	5	2.22752	0.1078	upregulated	5	2.57113	0.0764	downregulated	3	1.63355	0.1952	downregulated	3	2.03888	0.1302	downregulated	6	4.25832	0.0141	downregulated	8	3.41311	0.0329	upregulated	6	5.39427	0.0045
chondrocyte proliferation	GO	5 out of 7	5.01495	downregulated	2	3.45025	0.0317	upregulated	1	3.45025	0.0317	upregulated	1	2.08503	0.1243					downregulated	1	1.8254	0.1612	downregulated	1	0.733952	0.48	downregulated	1	0.370565	0.6903
cellular response to fibroblast growth factor stimulus	GO	4 out of 7	5.01418	upregulated	9	4.87639	0.0076	upregulated	5	1.64546	0.1929	upregulated	7	4.35131	0.0129	downregulated	4	2.85379	0.0576	upregulated	13	3.9007	0.0202	downregulated	9	4.17766	0.0153	upregulated	13	7.18285	0.0008
positive regulation of extrinsic apoptotic signaling pathway in absence of ligand	GO	4 out of 7	5.00367	upregulated	1	0.729254	0.4823	upregulated	1	3.18324	0.0415	downregulated	1	1.27562	0.2793	downregulated	1	1.62593	0.1967	downregulated	3	5.12215	0.006	upregulated	3	5.57551	0.0038	downregulated	2	4.4461	0.0117
toxic substance binding	GO	3 out of 7	5.00207	downregulated	1	2.36425	0.094													downregulated	1	2.47159	0.0845	downregulated	3	3.5691	0.0282	downregulated	1	1.32563	0.2656
peroxisomal membrane	GO	1 out of 7	4.99242	upregulated	5	3.83412	0.0216	upregulated	5	4.17302	0.0154	upregulated	6	5.41453	0.0045	downregulated	2	1.44811	0.235	downregulated	8	4.99242	0.0068	downregulated	15	8.0844	0.0003	downregulated	13	10.5075	2.7e-05
platelet morphogenesis	GO	3 out of 7	4.97487	upregulated	1	4.10551	0.0165	upregulated	1	1.32285	0.2664	downregulated	3	1.80659	0.1642					downregulated	2	2.2131	0.1094	upregulated	1	0.569124	0.566	upregulated	1	0.29087	0.7476
response to amyloid-beta	GO	3 out of 7	4.94891	downregulated	1	1.5617	0.2098	upregulated	1	3.15378	0.0427	upregulated	2	2.19167	0.1117	downregulated	2	0.960177	0.3828	upregulated	4	2.56845	0.0767	downregulated	6	4.6938	0.0092	downregulated	7	3.79114	0.0226
vesicle fusion	GO	3 out of 7	4.94216	upregulated	4	2.01208	0.1337	upregulated	5	3.79837	0.0224	downregulated	4	0.409796	0.6638	downregulated	4	1.69921	0.1828	downregulated	5	1.24072	0.2892	downregulated	10	3.24979	0.0388	downregulated	10	3.86694	0.0209
regulation of viral process	GO	3 out of 7	4.91729	downregulated	6	1.26007	0.2836	upregulated	12	7.21233	0.0007	downregulated	8	0.962356	0.382	downregulated	3	0.554903	0.5741	downregulated	10	0.735721	0.4792	downregulated	17	1.46013	0.2322	upregulated	16	1.71355	0.1802
actin-based cell projection	GO	3 out of 7	4.91204	downregulated	4	5.0596	0.0063	downregulated	3	2.341	0.0962	downregulated	20	5.18371	0.0056	downregulated	11	8.02777	0.0003	downregulated	20	9.27665	9.4e-05	downregulated	24	7.11687	0.0008	downregulated	21	9.13061	0.0001
positive regulation of peptidyl-lysine acetylation	GO	5 out of 7	4.90757	upregulated	2	0.862335	0.4222	upregulated	1	2.10401	0.122	upregulated	1	0.646998	0.5236					upregulated	4	1.01472	0.3625	downregulated	3	1.20828	0.2987	downregulated	3	1.10067	0.3326
ubiquitin-like protein binding	GO	4 out of 7	4.88392	upregulated	7	1.16412	0.3122	upregulated	5	1.14372	0.3186	upregulated	4	2.75744	0.0635	downregulated	3	0.43197	0.6492	upregulated	9	4.63676	0.0097	downregulated	18	3.92521	0.0197	upregulated	7	3.67459	0.0254
regulation of autophagy of mitochondrion	GO	4 out of 7	4.85281	downregulated	1	0.748042	0.4733	upregulated	1	0.25391	0.7758	downregulated	4	2.46626	0.0849	downregulated	4	3.37665	0.0342	downregulated	5	4.16511	0.0155	downregulated	9	2.87882	0.0562	downregulated	6	4.14591	0.0158
microtubule associated complex	GO	1 out of 7	4.84999	downregulated	4	2.28662	0.1016	upregulated	10	6.45948	0.0016	downregulated	20	8.03539	0.0003	downregulated	11	4.78375	0.0084	downregulated	18	4.84999	0.0078	downregulated	35	13.6515	1.2e-06	downregulated	26	10.2185	3.6e-05
monosaccharide metabolic process	GO	1 out of 7	4.81003	downregulated	3	4.18084	0.0153	downregulated	4	1.78062	0.1685	downregulated	4	1.08204	0.3389	downregulated	6	1.17069	0.3102	downregulated	15	4.81003	0.0081	downregulated	32	7.42376	0.0006	downregulated	25	6.57423	0.0014
cellular senescence	GO	4 out of 7	4.78695	downregulated	1	0.771086	0.4625	upregulated	1	0.267995	0.7649	downregulated	1	0.137417	0.8716					downregulated	3	2.19973	0.1108	downregulated	3	1.53479	0.2155	downregulated	2	1.69294	0.184
semi-lunar valve development	GO	5 out of 7	4.76611	upregulated	3	2.98276	0.0507	upregulated	1	0.913092	0.4013	downregulated	2	1.35903	0.2569	downregulated	4	4.98763	0.0068	downregulated	2	2.96294	0.0517	downregulated	2	1.19338	0.3032	downregulated	3	3.06059	0.0469
hydro-lyase activity	GO	3 out of 7	4.76211	downregulated	2	3.51702	0.0297					upregulated	1	0.742565	0.4759	downregulated	2	0.788117	0.4547	downregulated	8	7.57918	0.0005	downregulated	10	2.96266	0.0517	upregulated	6	2.21716	0.1089
lipid droplet	GO	1 out of 7	4.75177	downregulated	1	1.57771	0.2064	upregulated	5	5.14938	0.0058	downregulated	4	4.44614	0.0117	downregulated	5	2.88478	0.0559	downregulated	9	4.75177	0.0086	upregulated	6	1.82829	0.1607	upregulated	9	2.72133	0.0658
neural crest cell development	GO	5 out of 7	4.74151	upregulated	5	2.01414	0.1334	upregulated	2	3.8123	0.0221	downregulated	12	11.8391	7.2e-06	downregulated	3	1.07167	0.3424	downregulated	5	3.17797	0.0417	downregulated	10	3.56883	0.0282	downregulated	8	5.07905	0.0062
negative regulation of viral life cycle	GO	2 out of 7	4.72311	downregulated	3	1.31669	0.268	upregulated	7	7.69273	0.0005	downregulated	2	0.541584	0.5818					upregulated	7	1.21494	0.2967	downregulated	6	0.698467	0.4973	upregulated	6	0.59487	0.5516
Lys63-specific deubiquitinase activity	GO	5 out of 7	4.65846	upregulated	2	1.65042	0.192	upregulated	1	0.730734	0.4816	upregulated	1	1.47054	0.2298					upregulated	3	2.25705	0.1047	downregulated	3	2.06783	0.1265	downregulated	3	0.996	0.3694
determination of heart left/right asymmetry	GO	4 out of 7	4.65717	upregulated	7	5.76321	0.0031	downregulated	2	3.0437	0.0477	downregulated	3	3.39102	0.0337	downregulated	2	1.25902	0.2839	downregulated	7	3.73952	0.0238	downregulated	8	1.10718	0.3305	downregulated	5	1.74098	0.1753
mitochondrial intermembrane space	GO	1 out of 7	4.65204	upregulated	5	1.48119	0.2274	upregulated	3	2.25063	0.1053	downregulated	6	3.06148	0.0468	downregulated	3	2.30713	0.0995	downregulated	8	4.65204	0.0095	downregulated	11	3.14051	0.0433	downregulated	9	3.19755	0.0409
positive regulation of DNA-templated transcription, initiation	GO	4 out of 7	4.63393	upregulated	3	3.57605	0.028	upregulated	1	1.19592	0.3024	downregulated	2	0.718395	0.4875	downregulated	2	2.09642	0.1229	upregulated	4	1.51867	0.219	downregulated	3	1.90714	0.1485	downregulated	2	2.28829	0.1014
neurotransmitter:sodium symporter activity	GO	1 out of 7	4.62812	upregulated	2	5.30702	0.005					upregulated	1	7.09367	0.0008					downregulated	3	4.62812	0.0098	downregulated	4	4.8415	0.0079	downregulated	3	3.46685	0.0312
apicolateral plasma membrane	GO	4 out of 7	4.61781					upregulated	1	1.61407	0.1991	upregulated	1	1.12946	0.3232					upregulated	1	0.216359	0.8054	downregulated	2	1.22212	0.2946	downregulated	1	0.868513	0.4196
respiratory chain complex III	GO	2 out of 7	4.61275																					downregulated	3	3.19814	0.0408	downregulated	1	1.41461	0.243
FAD binding	GO	5 out of 7	4.61089	downregulated	1	1.09998	0.3329	downregulated	3	6.73311	0.0012	upregulated	1	1.25898	0.2839	upregulated	2	3.65798	0.0258	downregulated	4	4.50978	0.011	downregulated	3	1.95825	0.1411	downregulated	3	1.059	0.3468
response to cAMP	GO	3 out of 7	4.60014	downregulated	4	5.60456	0.0037	downregulated	1	0.278231	0.7571	downregulated	6	1.16735	0.3112	downregulated	7	3.97458	0.0188	downregulated	9	6.78003	0.0011	downregulated	14	4.39595	0.0123	downregulated	14	4.44888	0.0117
vacuolar transport	GO	3 out of 7	4.57494	upregulated	8	3.2461	0.0389	upregulated	7	1.75907	0.1722	upregulated	8	4.96023	0.007	downregulated	13	8.9963	0.0001	downregulated	17	6.85193	0.0011	upregulated	7	4.11512	0.0163	upregulated	7	2.99241	0.0502
negative regulation of adherens junction organization	GO	3 out of 7	4.54969	upregulated	1	2.42741	0.0883					downregulated	2	1.65596	0.1909	upregulated	1	3.02745	0.0484	upregulated	3	1.95139	0.1421	downregulated	3	2.70219	0.0671	upregulated	2	3.26413	0.0382
insulin receptor binding	GO	1 out of 7	4.53302	upregulated	2	2.76706	0.0628	upregulated	1	2.01078	0.1339	upregulated	2	1.78578	0.1677	downregulated	1	1.21769	0.2959	downregulated	4	4.53302	0.0107	upregulated	3	3.80528	0.0223	upregulated	2	2.66633	0.0695
positive regulation of potassium ion transmembrane transporter activity	GO	3 out of 7	4.51655									downregulated	1	0.486597	0.6147	downregulated	1	0.834101	0.4343	downregulated	1	0.591024	0.5538	downregulated	5	2.53787	0.079	downregulated	4	2.70835	0.0666
ATP-dependent microtubule motor activity	GO	5 out of 7	4.49523	upregulated	1	1.34154	0.2614	upregulated	1	1.05104	0.3496	downregulated	4	2.239	0.1066	downregulated	1	0.246774	0.7813	downregulated	2	0.351064	0.7039	downregulated	6	1.25704	0.2845	downregulated	3	2.98033	0.0508
voltage-gated calcium channel complex	GO	1 out of 7	4.49081	upregulated	5	6.9232	0.001	downregulated	2	1.80085	0.1652	upregulated	4	3.8364	0.0216					downregulated	5	4.49081	0.0112	downregulated	10	8.08668	0.0003	downregulated	8	3.38649	0.0338
oxidoreductase activity, acting on the CH-OH group of donors, NAD or NADP as acceptor	GO	3 out of 7	4.45853	downregulated	3	2.26817	0.1035	upregulated	6	2.76263	0.0631	upregulated	3	2.2643	0.1039	downregulated	10	7.4019	0.0006	downregulated	12	6.53661	0.0014	downregulated	15	5.52713	0.004	downregulated	17	5.83884	0.0029
cell cycle DNA replication	GO	2 out of 7	4.44801	upregulated	4	5.41972	0.0044	upregulated	4	8.33587	0.0002	downregulated	3	1.83202	0.1601	downregulated	2	1.52587	0.2174	upregulated	4	1.78767	0.1674	upregulated	3	1.65328	0.1914	upregulated	1	2.50874	0.0814
positive regulation of mitochondrial membrane permeability involved in apoptotic process	GO	3 out of 7	4.44339	downregulated	1	1.48679	0.2261									upregulated	1	3.13284	0.0436	upregulated	1	1.45391	0.2337	downregulated	3	1.8138	0.163	downregulated	2	2.43746	0.0874
neuron maturation	GO	4 out of 7	4.43833	upregulated	1	0.833725	0.4344					downregulated	6	7.20132	0.0007	downregulated	4	7.02204	0.0009	downregulated	3	6.3603	0.0017	downregulated	6	6.28579	0.0019	downregulated	7	5.18187	0.0056
ligand-gated calcium channel activity	GO	4 out of 7	4.32512					downregulated	1	4.04242	0.0176	upregulated	1	2.40072	0.0907	downregulated	2	2.02493	0.132	downregulated	2	1.00182	0.3672	downregulated	6	4.21135	0.0148	downregulated	4	2.77857	0.0621
protein phosphatase activator activity	GO	4 out of 7	4.32313	downregulated	1	1.92416	0.146	upregulated	1	1.09917	0.3331	downregulated	1	1.57215	0.2076	downregulated	1	5.18504	0.0056	downregulated	2	3.09288	0.0454	downregulated	5	4.22047	0.0147	downregulated	5	3.01981	0.0488
seminiferous tubule development	GO	6 out of 7	4.28502	upregulated	1	0.929689	0.3947	upregulated	1	1.01889	0.361	upregulated	1	1.46894	0.2302	downregulated	1	1.16891	0.3107	downregulated	1	0.636358	0.5292	downregulated	2	1.03873	0.3539	downregulated	1	0.361312	0.6968
positive regulation of feeding behavior	GO	3 out of 7	4.28045	upregulated	1	1.68702	0.1851																	downregulated	1	1.38767	0.2497	downregulated	1	1.20576	0.2995
microvillus	GO	1 out of 7	4.27276	downregulated	2	3.69967	0.0247	upregulated	2	1.24111	0.2891	downregulated	10	6.01307	0.0024	downregulated	7	9.59909	6.8e-05	downregulated	6	4.27276	0.0139	upregulated	7	3.06446	0.0467	upregulated	11	6.3241	0.0018
regulation of type B pancreatic cell proliferation	GO	2 out of 7	4.2222																	downregulated	2	2.37792	0.0927	downregulated	1	1.84428	0.1581	upregulated	1	1.87139	0.1539
cyclic nucleotide binding	GO	4 out of 7	4.21894	downregulated	1	2.19944	0.1109					downregulated	3	2.144	0.1172	upregulated	1	1.3485	0.2596	downregulated	3	1.85693	0.1562	downregulated	6	2.90706	0.0546	downregulated	6	2.44988	0.0863
nucleotide-activated protein kinase complex	GO	5 out of 7	4.20615	upregulated	1	1.48101	0.2274	upregulated	1	0.799311	0.4496	downregulated	1	0.459953	0.6313					downregulated	1	0.890962	0.4103	downregulated	1	0.206867	0.8131	downregulated	3	1.28795	0.2758
calcium import into the mitochondrion	GO	4 out of 7	4.18354	upregulated	1	1.48845	0.2257	downregulated	2	5.04578	0.0064									downregulated	1	2.42014	0.0889	downregulated	2	2.59504	0.0746	downregulated	1	2.72569	0.0655
polysome	GO	1 out of 7	4.17219	upregulated	2	0.370377	0.6905	upregulated	2	1.14056	0.3196	upregulated	3	1.72701	0.1778	upregulated	1	1.18517	0.3057	downregulated	6	4.17219	0.0154	upregulated	7	4.91955	0.0073	upregulated	17	12.7509	2.9e-06
AP-type membrane coat adaptor complex	GO	2 out of 7	4.14157	downregulated	3	3.14064	0.0433	downregulated	2	1.76294	0.1715	downregulated	5	2.94464	0.0526	downregulated	1	0.208747	0.8116	upregulated	7	0.878277	0.4155	downregulated	15	9.65928	6.4e-05	downregulated	9	3.41752	0.0328
regulation of phospholipase C activity	GO	4 out of 7	4.1224	upregulated	2	2.69594	0.0675	upregulated	2	6.26747	0.0019	downregulated	3	2.06016	0.1274	upregulated	1	1.55327	0.2116	upregulated	3	4.27252	0.0139	downregulated	5	2.26704	0.1036	upregulated	2	2.32864	0.0974
neurotransmitter transporter activity	GO	1 out of 7	4.09096	upregulated	2	4.2684	0.014	upregulated	1	1.97071	0.1394	upregulated	1	6.42073	0.0016	downregulated	1	1.74976	0.1738	downregulated	5	4.09096	0.0167	downregulated	9	4.30626	0.0135	downregulated	6	2.94002	0.0529
dorsal/ventral axis specification	GO	3 out of 7	4.09026									upregulated	1	1.17392	0.3092					upregulated	2	1.60689	0.2005	downregulated	3	2.34082	0.0962	downregulated	3	2.1824	0.1128
response to salt	GO	4 out of 7	4.07923	upregulated	1	1.2534	0.2855	downregulated	1	3.52707	0.0294	downregulated	2	3.07389	0.0462					downregulated	2	1.76342	0.1715	downregulated	2	3.35231	0.035	downregulated	2	4.31105	0.0134
protein N-terminus binding	GO	4 out of 7	4.07381	upregulated	6	2.37348	0.0932	upregulated	7	4.18569	0.0152	downregulated	12	3.7063	0.0246	downregulated	7	3.44975	0.0318	upregulated	12	7.20311	0.0007	downregulated	14	6.26816	0.0019	downregulated	12	5.60564	0.0037
regulation of phosphorylation of RNA polymerase II C-terminal domain	GO	2 out of 7	4.05294																	downregulated	1	1.21018	0.2981	downregulated	2	2.84276	0.0583	downregulated	2	1.39477	0.2479
CD4-positive, alpha-beta T cell activation	GO	3 out of 7	4.04712	downregulated	1	0.590184	0.5542	upregulated	1	4.65365	0.0095	downregulated	2	0.366688	0.693					upregulated	3	0.3733	0.6885	downregulated	2	0.685395	0.5039	downregulated	1	0.0382377	0.9625
organic acid transmembrane transport	GO	3 out of 7	4.01598	upregulated	8	2.30245	0.1	upregulated	3	1.92174	0.1464	downregulated	15	5.17431	0.0057	downregulated	7	3.72656	0.0241	downregulated	10	3.59982	0.0273	downregulated	20	3.51834	0.0296	downregulated	18	4.89342	0.0075
carboxylic acid transmembrane transport	GO	3 out of 7	4.01598	upregulated	8	2.30245	0.1	upregulated	3	1.92174	0.1464	downregulated	15	5.17431	0.0057	downregulated	7	3.72656	0.0241	downregulated	10	3.59982	0.0273	downregulated	20	3.51834	0.0296	downregulated	18	4.89342	0.0075
positive regulation of protein polyubiquitination	GO	4 out of 7	3.96936	upregulated	1	0.687945	0.5026	upregulated	2	2.73629	0.0648	upregulated	1	1.09637	0.3341	downregulated	1	1.13382	0.3218					downregulated	1	0.582575	0.5585
integral component of postsynaptic membrane	GO	3 out of 7	3.96002	upregulated	1	1.62853	0.1962					upregulated	1	3.61362	0.027					upregulated	2	1.5091	0.2211	upregulated	1	1.52414	0.2178	downregulated	2	1.75111	0.1736
negative regulation of receptor binding	GO	3 out of 7	3.93333									upregulated	1	1.01294	0.3631	upregulated	1	3.25039	0.0388	downregulated	2	1.1793	0.3075	upregulated	2	1.5093	0.2211
regulation of AMPA receptor activity	GO	4 out of 7	3.92563	upregulated	2	3.88435	0.0206	downregulated	2	3.22913	0.0396	upregulated	1	1.16088	0.3132					upregulated	2	4.76329	0.0085	downregulated	4	3.85427	0.0212	downregulated	4	3.01855	0.0489
protein-containing complex scaffold activity	GO	5 out of 7	3.91547	upregulated	8	3.61155	0.027	upregulated	5	3.77093	0.023	downregulated	10	7.54092	0.0005	upregulated	1	1.49467	0.2243	downregulated	8	3.16723	0.0421	downregulated	15	6.09321	0.0023	upregulated	13	6.6812	0.0013
mRNA cap binding complex	GO	1 out of 7	3.9143									upregulated	1	1.68158	0.1861	downregulated	1	2.51027	0.0812	downregulated	2	3.9143	0.02	downregulated	3	1.59272	0.2034	downregulated	4	4.88512	0.0076
lipid transporter activity	GO	1 out of 7	3.89816	downregulated	4	1.20146	0.3008	upregulated	4	0.9702	0.379	downregulated	10	5.06257	0.0063	downregulated	8	7.31667	0.0007	downregulated	7	3.89816	0.0203	downregulated	14	3.79242	0.0225	downregulated	16	5.17022	0.0057
negative regulation of proteasomal protein catabolic process	GO	5 out of 7	3.89008	upregulated	5	2.98658	0.0505	upregulated	2	0.978999	0.3757	upregulated	3	1.41594	0.2427	upregulated	1	1.88422	0.1519	upregulated	8	2.60753	0.0737	downregulated	8	1.21578	0.2965	upregulated	5	1.98389	0.1375
negative regulation of reactive oxygen species metabolic process	GO	4 out of 7	3.84763	downregulated	4	3.16875	0.0421	upregulated	2	2.17862	0.1132	downregulated	5	1.04869	0.3504	upregulated	1	1.74347	0.1749	downregulated	8	7.63143	0.0005	downregulated	4	5.24503	0.0053	upregulated	10	8.73348	0.0002
muscle cell fate commitment	GO	1 out of 7	3.79823	upregulated	1	4.45979	0.0116					downregulated	1	0.661563	0.516
nucleoid	GO	3 out of 7	3.75156	downregulated	1	0.697924	0.4976	upregulated	2	1.3941	0.2481	downregulated	1	0.824053	0.4387	downregulated	2	1.1818	0.3067	downregulated	3	1.57689	0.2066	downregulated	7	3.07324	0.0463	downregulated	5	1.98799	0.137
negative regulation of cell size	GO	2 out of 7	3.73586									upregulated	1	1.94523	0.143	upregulated	1	3.89833	0.0203	upregulated	1	0.520716	0.5941	upregulated	1	1.58698	0.2045	downregulated	1	1.28341	0.2771
regulation of protein K63-linked ubiquitination	GO	3 out of 7	3.70266									upregulated	1	3.33633	0.0356	downregulated	1	1.35907	0.2569	downregulated	1	1.37313	0.2533	downregulated	2	2.00296	0.1349	upregulated	1	1.65068	0.1919
proteasome core complex	GO	1 out of 7	3.69482					upregulated	1	1.72729	0.1778	downregulated	3	2.10368	0.122	downregulated	2	2.16569	0.1147	downregulated	3	3.69482	0.0249	downregulated	4	1.81404	0.163	downregulated	3	1.77447	0.1696
photoreceptor cell outer segment organization	GO	4 out of 7	3.67529	upregulated	1	1.64442	0.1931	downregulated	1	2.97417	0.0511	upregulated	1	1.64612	0.1928					downregulated	2	3.38423	0.0339	downregulated	2	1.36937	0.2543	upregulated	1	1.39467	0.2479
vacuolar membrane	GO	1 out of 7	3.67437	upregulated	16	3.99927	0.0183	upregulated	21	5.36863	0.0047	downregulated	43	27.8604	7.9e-13	downregulated	35	24.4563	2.4e-11	downregulated	34	3.67437	0.0254	downregulated	63	7.94535	0.0004	downregulated	48	3.57391	0.028
cadherin binding involved in cell-cell adhesion	GO	3 out of 7	3.66916	downregulated	1	1.71588	0.1798	upregulated	1	1.30719	0.2706	upregulated	2	3.00014	0.0498	upregulated	1	3.09115	0.0454	upregulated	1	0.117977	0.8887	upregulated	2	1.89546	0.1502
ear morphogenesis	GO	3 out of 7	3.66398	upregulated	4	1.6927	0.184	downregulated	2	1.32779	0.2651	upregulated	6	2.29647	0.1006					downregulated	8	4.31058	0.0134	downregulated	8	0.978922	0.3757	downregulated	5	1.71637	0.1797
regulation of axon guidance	GO	4 out of 7	3.6544	downregulated	2	4.13406	0.016	upregulated	2	2.22494	0.1081	downregulated	5	5.28065	0.0051	downregulated	2	1.60833	0.2002	downregulated	3	2.84165	0.0583	downregulated	9	5.32348	0.0049	downregulated	6	4.28736	0.0137
regulation of protein localization to cell surface	GO	5 out of 7	3.63738	downregulated	1	0.958782	0.3834	downregulated	1	2.13907	0.1178	upregulated	1	0.319429	0.7266	upregulated	1	2.16461	0.1148	downregulated	3	0.469808	0.6251	downregulated	8	1.78458	0.1679	downregulated	5	1.9968	0.1358
heart development	GO	4 out of 7	3.6324	upregulated	31	5.79126	0.0031	downregulated	8	2.42716	0.0883	downregulated	30	4.71577	0.009	upregulated	6	2.58398	0.0755	downregulated	25	3.00781	0.0494	downregulated	51	3.58468	0.0277	upregulated	45	4.19241	0.0151
profilin binding	GO	1 out of 7	3.60359									downregulated	1	0.752277	0.4713					downregulated	2	3.60359	0.0272	downregulated	5	7.34343	0.0006	downregulated	2	3.13842	0.0434
negative regulation of peptidyl-lysine acetylation	GO	3 out of 7	3.60176	downregulated	1	3.38957	0.0337					upregulated	1	2.0275	0.1317	downregulated	1	0.586765	0.5561	upregulated	4	2.53474	0.0793	downregulated	2	2.51082	0.0812	downregulated	3	3.03977	0.0478
cell recognition	GO	3 out of 7	3.5469	downregulated	7	2.6108	0.0735	upregulated	1	0.878474	0.4154	downregulated	8	2.4542	0.0859	downregulated	4	2.60134	0.0742	downregulated	6	3.79531	0.0225	downregulated	12	6.53945	0.0014	upregulated	8	4.26583	0.014
regulation of epithelial cell differentiation involved in kidney development	GO	4 out of 7	3.52816	upregulated	1	0.797152	0.4506	upregulated	1	2.59257	0.0748	upregulated	1	1.72596	0.178	downregulated	1	2.09741	0.1228	upregulated	2	1.79885	0.1655	upregulated	1	0.457059	0.6331	downregulated	2	2.76579	0.0629
signal sequence binding	GO	1 out of 7	3.50655	upregulated	3	0.643358	0.5255	downregulated	1	0.520566	0.5942	upregulated	3	3.33685	0.0355	downregulated	1	0.189167	0.8276	downregulated	7	3.50655	0.03	downregulated	10	3.84838	0.0213	downregulated	11	3.74037	0.0237
SNAP receptor activity	GO	1 out of 7	3.50314	downregulated	1	1.43696	0.2376	upregulated	3	1.93857	0.1439	downregulated	2	0.392755	0.6752	downregulated	1	0.586911	0.556	downregulated	5	3.50314	0.0301	downregulated	5	2.20653	0.1101	downregulated	6	3.3887	0.0338
caveola	GO	1 out of 7	3.49957	upregulated	3	2.21929	0.1087	upregulated	5	9.77661	5.7e-05	upregulated	6	4.8049	0.0082	downregulated	4	2.02212	0.1324	downregulated	3	3.49957	0.0302	downregulated	10	3.66898	0.0255	upregulated	4	2.5732	0.0763
ceramide binding	GO	4 out of 7	3.47498	upregulated	1	0.843731	0.4301					downregulated	2	3.77473	0.0229	downregulated	1	1.72166	0.1788	downregulated	1	1.10031	0.3328	downregulated	3	2.53093	0.0796	downregulated	4	4.4964	0.0111
negative regulation of dendrite development	GO	4 out of 7	3.44867	downregulated	1	1.15534	0.315	upregulated	1	3.08419	0.0458	downregulated	1	1.07748	0.3405	downregulated	3	3.37311	0.0343	downregulated	4	3.059	0.0469	downregulated	3	1.80667	0.1642	downregulated	3	1.10474	0.3313
intraciliary retrograde transport	GO	3 out of 7	3.43909	downregulated	1	1.82736	0.1608					upregulated	1	3.0871	0.0456					downregulated	1	0.735099	0.4795	downregulated	2	1.44425	0.2359
negative regulation of endothelial cell apoptotic process	GO	3 out of 7	3.40773	downregulated	1	0.818305	0.4412					downregulated	2	0.910515	0.4023	downregulated	3	4.25831	0.0141	downregulated	3	3.02278	0.0487	downregulated	1	4.20549	0.0149	downregulated	1	2.16659	0.1146
iron ion import	GO	4 out of 7	3.3749	upregulated	1	0.880479	0.4146					upregulated	2	1.73742	0.176	upregulated	1	2.96918	0.0513	downregulated	2	0.56753	0.5669	upregulated	2	1.37644	0.2525	upregulated	2	1.40327	0.2458
transferase activity, transferring sulfur-containing groups	GO	3 out of 7	3.36416	upregulated	2	1.82315	0.1615					upregulated	3	4.96863	0.007	downregulated	2	2.45629	0.0858	upregulated	5	0.965955	0.3806	downregulated	6	3.09292	0.0454	upregulated	4	3.09829	0.0451
positive regulation of membrane permeability	GO	3 out of 7	3.36416	downregulated	1	1.17125	0.31									upregulated	1	2.77282	0.0625	downregulated	2	1.45562	0.2333	upregulated	2	1.48196	0.2272	downregulated	2	1.78893	0.1671
regulation of rRNA processing	GO	3 out of 7	3.36382					upregulated	1	2.05843	0.1277													downregulated	2	0.867853	0.4199	downregulated	1	0.437533	0.6456
regulation of smooth muscle cell proliferation	GO	5 out of 7	3.36228	upregulated	5	4.12165	0.0162	upregulated	3	0.606154	0.5454	upregulated	7	3.96553	0.019	downregulated	9	5.7469	0.0032	upregulated	9	2.35025	0.0953	downregulated	10	1.39644	0.2475	downregulated	10	1.36966	0.2542
regulation of organ growth	GO	4 out of 7	3.28724	upregulated	6	3.97103	0.0189	downregulated	3	1.68436	0.1856	downregulated	8	4.7784	0.0084	downregulated	6	2.64051	0.0713	downregulated	5	2.16855	0.1143	downregulated	9	2.05747	0.1278	downregulated	11	4.19347	0.0151
NIK/NF-kappaB signaling	GO	4 out of 7	3.22061	upregulated	3	1.62635	0.1966	upregulated	1	2.83176	0.0589	upregulated	1	2.68256	0.0684	downregulated	3	1.81534	0.1628	upregulated	3	1.41922	0.2419	upregulated	3	1.00351	0.3666	downregulated	2	0.317997	0.7276
DNA biosynthetic process	GO	3 out of 7	3.21615	upregulated	5	0.7355	0.4793	upregulated	10	9.8024	5.5e-05	downregulated	4	0.131745	0.8766	downregulated	4	1.42514	0.2405	upregulated	10	3.53519	0.0292	upregulated	6	2.2938	0.1009	downregulated	2	0.0641207	0.9379
negative regulation of cytokine production involved in inflammatory response	GO	2 out of 7	3.20591	upregulated	1	4.12137	0.0162																	downregulated	1	0.439385	0.6444	upregulated	1	1.35484	0.258
inner dynein arm assembly	GO	1 out of 7	3.19916																	downregulated	3	3.61432	0.0269					upregulated	1	0.415157	0.6602
smooth muscle contraction	GO	3 out of 7	3.18536	upregulated	2	3.91866	0.0199	upregulated	2	2.37934	0.0926	downregulated	5	4.46977	0.0114	downregulated	1	3.56204	0.0284	downregulated	5	4.91917	0.0073	downregulated	9	7.84332	0.0004	downregulated	9	7.40286	0.0006
positive regulation of voltage-gated potassium channel activity	GO	2 out of 7	3.17672																	downregulated	1	1.06984	0.3431	upregulated	1	1.24533	0.2878	downregulated	3	3.35221	0.035
hormone receptor binding	GO	4 out of 7	3.17528	upregulated	6	0.480356	0.6186	upregulated	5	0.303061	0.7386	downregulated	16	3.18753	0.0413	upregulated	5	5.45249	0.0043	upregulated	23	3.93713	0.0195	downregulated	20	4.06393	0.0172	upregulated	18	3.93703	0.0195
positive regulation of non-canonical Wnt signaling pathway	GO	2 out of 7	3.149	upregulated	1	2.22343	0.1082					downregulated	1	0.732131	0.4809									downregulated	3	2.3306	0.0972	upregulated	1	0.672892	0.5102
endoplasmic reticulum-Golgi intermediate compartment	GO	1 out of 7	3.13414	upregulated	5	1.17879	0.3077	upregulated	7	2.58585	0.0753	downregulated	8	0.669245	0.5121	downregulated	5	0.652804	0.5206	downregulated	14	3.13414	0.0435	upregulated	8	2.61842	0.0729	downregulated	15	1.31213	0.2692
basement membrane	GO	1 out of 7	3.11656	downregulated	3	2.74669	0.0641	upregulated	2	1.68035	0.1863	downregulated	6	2.42219	0.0887	downregulated	2	0.446461	0.6399	downregulated	7	3.11656	0.0443	downregulated	11	1.56442	0.2092	downregulated	9	1.25993	0.2837
RNA stem-loop binding	GO	4 out of 7	3.08432					upregulated	1	0.591508	0.5535	downregulated	2	1.60889	0.2001	upregulated	1	4.09359	0.0167	downregulated	1	1.65902	0.1903	downregulated	2	2.49313	0.0827	upregulated	3	4.14403	0.0159
muscle filament sliding	GO	4 out of 7	3.07866	upregulated	2	1.47092	0.2297	downregulated	1	1.35795	0.2572	upregulated	1	0.896398	0.408	upregulated	2	4.87696	0.0076	downregulated	1	0.506424	0.6026	upregulated	2	1.23755	0.2901	upregulated	2	2.07654	0.1254
Ras guanyl-nucleotide exchange factor activity	GO	1 out of 7	3.06503	upregulated	21	3.78456	0.0227	upregulated	8	1.07343	0.3418	downregulated	28	10.7809	2.1e-05	downregulated	19	5.03191	0.0065	downregulated	20	3.06503	0.0467	downregulated	48	8.49849	0.0002	downregulated	31	4.5646	0.0104
oxidoreductase activity, acting on CH-OH group of donors	GO	3 out of 7	3.06251	downregulated	3	2.10254	0.1221	upregulated	6	2.35215	0.0952	upregulated	3	2.10079	0.1224	downregulated	10	6.63515	0.0013	upregulated	12	6.11627	0.0022	downregulated	16	4.6423	0.0096	downregulated	17	4.80576	0.0082
cis-Golgi network	GO	1 out of 7	3.01493					upregulated	1	2.10356	0.122	downregulated	8	5.56024	0.0038	upregulated	2	2.98572	0.0505	downregulated	6	3.01493	0.049	upregulated	3	4.97545	0.0069	upregulated	5	4.28248	0.0138
lipoprotein biosynthetic process	GO	3 out of 7	3.00503	upregulated	8	6.35099	0.0017	upregulated	4	1.84038	0.1588	downregulated	4	2.10605	0.1217	downregulated	5	1.87599	0.1532	downregulated	8	3.27998	0.0376	upregulated	2	1.75964	0.1721	upregulated	6	2.72466	0.0656
nerve development	GO	4 out of 7	3.00501	downregulated	2	2.06666	0.1266	upregulated	2	0.751196	0.4718	downregulated	5	3.87937	0.0207	downregulated	1	0.0623672	0.9395	downregulated	4	3.14379	0.0431	downregulated	6	2.55921	0.0774	downregulated	6	2.55921	0.0774
fatty acid binding	GO	1 out of 7	3.00167	upregulated	1	0.660789	0.5164	upregulated	3	2.90716	0.0546	downregulated	3	9.46492	7.8e-05	downregulated	2	4.48198	0.0113	downregulated	2	3.00167	0.0497	downregulated	3	2.03681	0.1304	downregulated	2	2.55451	0.0777
scaffold protein binding	GO	4 out of 7	2.94733	upregulated	3	1.31455	0.2686	upregulated	2	2.05214	0.1285	upregulated	6	4.91462	0.0073	upregulated	2	2.08686	0.1241	upregulated	11	3.97668	0.0187	upregulated	4	0.808228	0.4456	upregulated	5	2.63592	0.0717
phosphatase activator activity	GO	4 out of 7	2.92781	downregulated	1	1.76773	0.1707	upregulated	1	0.963407	0.3816	downregulated	1	1.39016	0.249	downregulated	1	4.978	0.0069	downregulated	3	2.78867	0.0615	downregulated	5	3.55084	0.0287	downregulated	5	2.37062	0.0934
response to temperature stimulus	GO	4 out of 7	2.92645	upregulated	10	3.25624	0.0385	upregulated	5	1.3548	0.258	upregulated	4	0.505447	0.6032	downregulated	5	0.752921	0.471	downregulated	16	7.59975	0.0005	upregulated	8	4.35613	0.0128	upregulated	13	4.68074	0.0093
interleukin-15-mediated signaling pathway	GO	4 out of 7	2.91918	downregulated	1	1.36403	0.2556					downregulated	1	0.833342	0.4346	upregulated	1	2.06642	0.1266	downregulated	1	0.582597	0.5584	downregulated	1	1.748	0.1741	downregulated	1	0.71954	0.487
G-protein coupled purinergic nucleotide receptor signaling pathway	GO	2 out of 7	2.91671	downregulated	1	5.37285	0.0046	upregulated	2	10.5124	2.7e-05	upregulated	1	3.37195	0.0343	downregulated	2	5.59477	0.0037
hormone biosynthetic process	GO	4 out of 7	2.91296	upregulated	1	1.20094	0.3009	upregulated	2	1.84611	0.1578	upregulated	2	2.15036	0.1164	downregulated	4	2.27721	0.1026	upregulated	3	2.36586	0.0939	downregulated	7	1.60491	0.2009	upregulated	4	1.52351	0.2179
sperm midpiece	GO	4 out of 7	2.91148	upregulated	1	2.496	0.0824	upregulated	1	1.2697	0.2809	upregulated	1	1.37649	0.2525					downregulated	1	0.810298	0.4447	upregulated	1	1.9973	0.1357	upregulated	1	1.0437	0.3522
ubiquitin-like protein conjugating enzyme binding	GO	5 out of 7	2.9112	upregulated	3	0.78939	0.4541	upregulated	2	0.665964	0.5138	upregulated	2	1.41322	0.2434	downregulated	1	0.750273	0.4722	upregulated	7	3.18272	0.0415	downregulated	8	2.35806	0.0946	downregulated	4	1.61756	0.1984
regulation of microtubule polymerization or depolymerization	GO	3 out of 7	2.87306	upregulated	6	3.4315	0.0323	upregulated	3	0.919243	0.3988	downregulated	8	1.85669	0.1562	downregulated	3	0.745353	0.4746	upregulated	7	10.0208	4.4e-05	downregulated	18	11.1452	1.4e-05	downregulated	14	7.9368	0.0004
keratinization	GO	5 out of 7	2.84951	downregulated	3	1.93196	0.1449	downregulated	2	2.94841	0.0524	upregulated	2	1.64584	0.1929	upregulated	2	1.45288	0.2339	downregulated	2	0.33542	0.715	downregulated	5	2.31964	0.0983	downregulated	3	1.97611	0.1386
plasma membrane raft	GO	4 out of 7	2.84523	upregulated	4	2.24313	0.1061	upregulated	5	8.77123	0.0002	downregulated	11	7.23228	0.0007	downregulated	6	5.23147	0.0053	downregulated	6	3.24013	0.0392	downregulated	15	3.39649	0.0335	upregulated	5	2.342	0.0961
myoblast fusion	GO	3 out of 7	2.81632	upregulated	1	1.3355	0.263					downregulated	1	0.584412	0.5574	downregulated	1	1.09641	0.3341	upregulated	1	0.284617	0.7523	downregulated	2	1.56426	0.2092	downregulated	2	1.882	0.1523
leukocyte adhesion to vascular endothelial cell	GO	3 out of 7	2.7905					upregulated	1	3.97472	0.0188	upregulated	1	1.35434	0.2581	downregulated	1	2.31507	0.0988	upregulated	2	0.931737	0.3939	downregulated	2	2.43826	0.0873	upregulated	2	1.73002	0.1773
negative regulation of viral process	GO	2 out of 7	2.7783	downregulated	4	1.82683	0.1609	upregulated	7	6.86903	0.001	upregulated	1	0.483068	0.6169	downregulated	1	0.285614	0.7516	upregulated	9	1.36703	0.2549	downregulated	6	0.493415	0.6105	upregulated	8	1.10467	0.3313
exopeptidase activity	GO	3 out of 7	2.74899	upregulated	2	1.00849	0.3648	upregulated	5	1.10796	0.3302	downregulated	9	3.55764	0.0285	downregulated	8	5.81893	0.003	downregulated	14	12.1054	5.5e-06	upregulated	5	1.52819	0.2169	upregulated	4	2.09626	0.1229
response to thyroid hormone	GO	4 out of 7	2.74517					upregulated	2	2.17096	0.1141	upregulated	2	3.18665	0.0413	downregulated	3	4.45979	0.0116	upregulated	3	3.04343	0.0477	downregulated	3	2.39924	0.0908	downregulated	2	2.49155	0.0828
chylomicron	GO	2 out of 7	2.72152					upregulated	1	1.30968	0.2699	downregulated	1	0.639388	0.5276					downregulated	1	2.05123	0.1286
IRE1-mediated unfolded protein response	GO	4 out of 7	2.70574	upregulated	1	0.976655	0.3766	downregulated	1	0.731349	0.4813	upregulated	4	3.18561	0.0414	downregulated	2	1.47375	0.2291	upregulated	8	4.13049	0.0161	downregulated	7	2.40118	0.0906	downregulated	7	2.47789	0.0839
positive regulation of response to drug	GO	3 out of 7	2.67919	upregulated	1	3.59456	0.0275					downregulated	3	2.56182	0.0772	downregulated	2	2.34141	0.0962	downregulated	4	4.74274	0.0087	upregulated	3	1.40297	0.2459	downregulated	1	0.648097	0.523
protein localization to cell junction	GO	2 out of 7	2.66785	upregulated	1	2.18494	0.1125					downregulated	1	0.662583	0.5155					upregulated	1	0.376701	0.6861	downregulated	1	1.5222	0.2182	upregulated	2	2.5307	0.0796
presynapse assembly	GO	3 out of 7	2.65534	upregulated	2	2.87671	0.0563	upregulated	1	1.22969	0.2924	upregulated	2	3.7524	0.0235	upregulated	1	3.47291	0.031	upregulated	1	1.52216	0.2182	upregulated	1	1.10244	0.3321	upregulated	2	2.29937	0.1003
mitochondrial ribosome	GO	1 out of 7	2.64593	upregulated	9	5.63471	0.0036	upregulated	4	1.41803	0.2422	upregulated	3	1.48887	0.2256	upregulated	1	0.918966	0.3989	downregulated	7	2.64593	0.0709	upregulated	4	0.502021	0.6053	downregulated	10	1.06054	0.3463
positive regulation of gonad development	GO	1 out of 7	2.64586	upregulated	1	2.64586	0.0709
positive regulation of sprouting angiogenesis	GO	3 out of 7	2.61553	downregulated	2	4.15321	0.0157					downregulated	4	3.62743	0.0266	downregulated	1	3.0871	0.0456	downregulated	4	5.7856	0.0031	downregulated	2	2.7925	0.0613	downregulated	2	4.90517	0.0074
signal transduction involved in G2 DNA damage checkpoint	GO	5 out of 7	2.59472	upregulated	1	0.532666	0.587	upregulated	2	2.0932	0.1233	upregulated	1	2.207	0.11	downregulated	2	3.47854	0.0309	upregulated	3	3.08358	0.0458	downregulated	3	3.08432	0.0458	downregulated	2	1.23966	0.2895
detection of light stimulus involved in sensory perception	GO	3 out of 7	2.55797	upregulated	1	2.02349	0.1322					downregulated	1	1.94832	0.1425	downregulated	1	1.876	0.1532					downregulated	1	1.73653	0.1761	downregulated	1	2.62227	0.0726
cell communication by electrical coupling involved in cardiac conduction	GO	3 out of 7	2.55657					downregulated	1	4.775	0.0084					downregulated	1	2.44233	0.087	downregulated	2	2.22848	0.1077	downregulated	4	4.62646	0.0098	downregulated	1	2.91896	0.054
regulation of cell proliferation involved in heart morphogenesis	GO	3 out of 7	2.51741	downregulated	1	1.03469	0.3553	upregulated	1	1.34779	0.2598	upregulated	3	5.01923	0.0066	downregulated	1	1.47326	0.2292	upregulated	1	0.351932	0.7033	downregulated	1	0.79037	0.4537	upregulated	3	1.78011	0.1686
regulation of amyloid-beta clearance	GO	4 out of 7	2.49339					upregulated	1	1.07838	0.3401	downregulated	1	0.598749	0.5495	downregulated	1	3.72511	0.0241	downregulated	1	1.95404	0.1417	downregulated	1	2.03595	0.1306	downregulated	1	1.74887	0.174
positive regulation of ERAD pathway	GO	3 out of 7	2.48184	upregulated	2	2.95991	0.0518	upregulated	2	3.37498	0.0342	downregulated	1	0.403955	0.6677	downregulated	1	1.07434	0.3415	downregulated	2	1.55217	0.2118	upregulated	1	1.08581	0.3376	upregulated	2	2.84111	0.0584
porphyrin-containing compound metabolic process	GO	3 out of 7	2.48073	upregulated	1	1.00178	0.3672	upregulated	3	3.00814	0.0494	downregulated	3	2.4083	0.09	upregulated	1	1.93816	0.144	upregulated	3	1.05906	0.3468	downregulated	6	2.48166	0.0836	upregulated	4	1.49107	0.2251
calcium channel regulator activity	GO	1 out of 7	2.47164	upregulated	5	6.83381	0.0011	upregulated	2	3.41807	0.0328	downregulated	3	0.730145	0.4818					downregulated	3	2.47164	0.0844	downregulated	9	7.29727	0.0007	downregulated	5	4.3625	0.0127
meiosis I	GO	3 out of 7	2.43165	upregulated	4	0.798448	0.45	upregulated	8	4.37802	0.0126	downregulated	6	1.7614	0.1718	downregulated	4	1.57158	0.2077	downregulated	5	0.588174	0.5553	upregulated	2	0.679965	0.5066	upregulated	1	0.0747458	0.928
mitochondrial large ribosomal subunit	GO	1 out of 7	2.42607	upregulated	7	5.87458	0.0028	upregulated	3	1.49855	0.2235	upregulated	3	2.38972	0.0917	upregulated	1	1.26619	0.2819	downregulated	5	2.42607	0.0884	upregulated	3	0.66118	0.5162	downregulated	8	1.65335	0.1914
iron-sulfur cluster binding	GO	4 out of 7	2.41674	upregulated	3	1.10913	0.3298	upregulated	1	4.1292	0.0161	downregulated	6	1.88932	0.1512	downregulated	3	1.57767	0.2065	upregulated	7	3.18215	0.0415	downregulated	7	2.3503	0.0953	downregulated	8	1.47724	0.2283
activation of cysteine-type endopeptidase activity	GO	3 out of 7	2.40452	downregulated	1	1.53441	0.2156					upregulated	2	3.08419	0.0458	downregulated	1	0.837662	0.4327	upregulated	1	0.601514	0.548	downregulated	1	0.628592	0.5333	downregulated	2	1.66532	0.1891
cellular response to leukemia inhibitory factor	GO	4 out of 7	2.40387	upregulated	8	2.29851	0.1004	upregulated	6	1.82561	0.1611	downregulated	10	5.98978	0.0025	downregulated	8	4.8961	0.0075	upregulated	16	4.00353	0.0183	downregulated	14	4.69423	0.0091	downregulated	14	8.47493	0.0002
regulation of RNA polymerase II regulatory region sequence-specific DNA binding	GO	1 out of 7	2.35283					upregulated	1	4.36756	0.0127					downregulated	1	1.3975	0.2472	upregulated	1	0.617236	0.5394
cellular response to amyloid-beta	GO	3 out of 7	2.34976	downregulated	1	1.62249	0.1974	upregulated	1	3.25023	0.0388	upregulated	2	2.2561	0.1048	downregulated	1	0.851704	0.4267	upregulated	4	2.76618	0.0629	downregulated	4	2.59574	0.0746	downregulated	5	1.74416	0.1748
oxidative phosphorylation	GO	1 out of 7	2.33757	upregulated	4	1.05577	0.3479	upregulated	3	1.17225	0.3097	upregulated	2	0.709627	0.4918					downregulated	6	2.33757	0.0966	downregulated	19	11.1008	1.5e-05	downregulated	13	7.24667	0.0007
regulation of phospholipid metabolic process	GO	4 out of 7	2.33337	upregulated	2	2.20582	0.1102	upregulated	5	5.22628	0.0054	downregulated	9	4.78515	0.0084	downregulated	5	4.7487	0.0087	upregulated	8	3.17933	0.0416	downregulated	12	2.54111	0.0788	downregulated	8	1.894	0.1505
bone resorption	GO	3 out of 7	2.33056	downregulated	1	1.01683	0.3617	upregulated	1	1.2236	0.2942	downregulated	1	1.16989	0.3104	downregulated	1	1.29699	0.2734	upregulated	1	0.598629	0.5496	downregulated	2	3.32679	0.0359	downregulated	2	1.86251	0.1553
positive regulation of actin cytoskeleton reorganization	GO	4 out of 7	2.3132	downregulated	1	2.52353	0.0802	downregulated	1	4.75278	0.0086	upregulated	1	1.39351	0.2482					downregulated	1	0.518405	0.5955	downregulated	4	4.55052	0.0106	downregulated	3	3.12707	0.0438
striated muscle cell development	GO	4 out of 7	2.30385	upregulated	5	4.40304	0.0122	upregulated	5	1.78397	0.168	downregulated	9	3.7021	0.0247	downregulated	2	2.80436	0.0605	downregulated	6	1.76654	0.1709	upregulated	6	2.60619	0.0738	downregulated	14	3.46295	0.0313
phospholipid transporter activity	GO	1 out of 7	2.29968	downregulated	2	0.814728	0.4428	upregulated	2	1.953	0.1418	downregulated	4	3.26461	0.0382	downregulated	4	3.23379	0.0394	downregulated	5	2.29968	0.1003	downregulated	10	3.99217	0.0185	downregulated	10	3.90296	0.0202
regulation of protein targeting to mitochondrion	GO	3 out of 7	2.2437	upregulated	3	2.23012	0.1075					upregulated	1	0.742565	0.4759	downregulated	2	0.788117	0.4547	downregulated	7	3.6583	0.0258	upregulated	3	1.78457	0.1679	upregulated	3	1.8146	0.1629
positive regulation of flagellated sperm motility	GO	1 out of 7	2.22567									upregulated	1	2.22567	0.108
regulation of macrophage apoptotic process	GO	1 out of 7	2.22322	upregulated	1	4.79467	0.0083													upregulated	2	2.57145	0.0764
respiratory gaseous exchange	GO	3 out of 7	2.2186	upregulated	2	1.57193	0.2076	upregulated	2	1.73608	0.1762	downregulated	1	2.32205	0.0981	upregulated	2	2.46563	0.085	downregulated	2	0.503092	0.6047	upregulated	3	2.20239	0.1105	upregulated	3	1.24819	0.287
small-subunit processome	GO	3 out of 7	2.20767	upregulated	2	0.977713	0.3762	upregulated	2	2.18709	0.1122													downregulated	4	0.523386	0.5925	upregulated	2	1.48052	0.2275
response to steroid hormone	GO	4 out of 7	2.19908	downregulated	11	3.46124	0.0314	upregulated	9	4.06177	0.0172	upregulated	12	2.84808	0.058	upregulated	6	5.15848	0.0058	downregulated	25	8.83142	0.0001	upregulated	22	5.50266	0.0041	upregulated	36	9.73677	5.9e-05
establishment of skin barrier	GO	3 out of 7	2.19321	upregulated	1	1.65796	0.1905					downregulated	1	0.388522	0.6781					downregulated	1	0.673673	0.5098	downregulated	1	0.250099	0.7787
drug transport	GO	3 out of 7	2.18895	upregulated	5	1.42166	0.2413	downregulated	4	2.53977	0.0789	downregulated	7	9.60236	6.8e-05	downregulated	3	1.13898	0.3201	downregulated	12	9.95336	4.8e-05	downregulated	17	7.40221	0.0006	upregulated	8	5.84695	0.0029
embryonic organ morphogenesis	GO	4 out of 7	2.18387	downregulated	11	3.80308	0.0223	downregulated	5	3.049	0.0474	downregulated	19	3.06654	0.0466	upregulated	1	0.583276	0.5581	downregulated	17	3.68164	0.0252	downregulated	22	4.26183	0.0141	downregulated	14	3.57574	0.028
long-chain fatty acid import	GO	2 out of 7	2.17781					upregulated	2	3.02022	0.0488	upregulated	2	4.40345	0.0122									upregulated	1	1.91426	0.1475	upregulated	2	3.33159	0.0357
nitric oxide metabolic process	GO	2 out of 7	2.15614													downregulated	1	3.57293	0.0281	downregulated	2	4.85843	0.0078	downregulated	1	3.45381	0.0316	downregulated	1	2.27526	0.1028
glycosaminoglycan binding	GO	1 out of 7	2.09094	downregulated	4	1.62252	0.1974	upregulated	8	2.60084	0.0742	downregulated	11	1.77883	0.1688	downregulated	7	5.56597	0.0038	downregulated	11	2.09094	0.1236	upregulated	7	0.854978	0.4253	downregulated	16	1.09861	0.3333
positive regulation of protein localization to cell surface	GO	2 out of 7	2.07607	downregulated	1	1.84209	0.1585																	downregulated	3	1.92353	0.1461	downregulated	3	1.99462	0.1361
maintenance of protein location in nucleus	GO	3 out of 7	2.07471	upregulated	2	1.27423	0.2796	upregulated	2	4.41148	0.0121	downregulated	2	0.930464	0.3944	downregulated	1	0.837446	0.4328	upregulated	5	2.31477	0.0988	downregulated	5	1.99886	0.1355	upregulated	1	1.52718	0.2171
kinesin complex	GO	1 out of 7	2.05501	downregulated	2	4.33468	0.0131	upregulated	3	3.05365	0.0472	downregulated	7	4.97892	0.0069	downregulated	5	4.84822	0.0078	downregulated	5	2.05501	0.1281	downregulated	10	6.4939	0.0015	downregulated	11	9.98806	4.6e-05
cell trailing edge	GO	2 out of 7	2.0468									downregulated	1	1.28972	0.2753	downregulated	2	2.7595	0.0633	upregulated	1	1.28831	0.2757	downregulated	2	3.80239	0.0223	downregulated	1	3.58195	0.0278
positive regulation of protein targeting to mitochondrion	GO	4 out of 7	2.03866	upregulated	2	0.842821	0.4305					upregulated	1	0.897687	0.4075	downregulated	2	1.04016	0.3534	downregulated	5	2.46901	0.0847	upregulated	2	1.64451	0.1931	downregulated	3	0.513809	0.5982
guanyl-nucleotide exchange factor activity	GO	1 out of 7	2.02842	downregulated	11	5.93737	0.0026	upregulated	11	3.84403	0.0214	downregulated	35	14.2692	6.4e-07	downregulated	23	6.60396	0.0014	downregulated	24	2.02842	0.1315	downregulated	58	9.82942	5.4e-05	downregulated	40	4.96554	0.007
positive regulation of cellular protein localization	GO	2 out of 7	2.00422	downregulated	8	0.979261	0.3756	downregulated	6	2.18337	0.1127	downregulated	25	3.30077	0.0369	downregulated	15	3.09195	0.0454	upregulated	27	4.06177	0.0172	downregulated	46	8.36998	0.0002	downregulated	42	7.25136	0.0007
regulation of early endosome to late endosome transport	GO	2 out of 7	1.96468	upregulated	2	2.55361	0.0778	upregulated	1	0.904334	0.4048	downregulated	1	0.594758	0.5517	downregulated	1	0.535548	0.5853	upregulated	1	0.362963	0.6956	downregulated	4	1.98267	0.1377	downregulated	2	0.683151	0.505
spinal cord development	GO	2 out of 7	1.95442	downregulated	2	1.77024	0.1703	upregulated	3	2.7882	0.0615	downregulated	8	1.92935	0.1452	downregulated	4	1.16569	0.3117	upregulated	13	3.69445	0.0249	downregulated	11	4.0315	0.0177	upregulated	12	4.31549	0.0134
intra-Golgi vesicle-mediated transport	GO	3 out of 7	1.92589	upregulated	2	1.68332	0.1858	upregulated	1	0.304474	0.7375	downregulated	3	2.36182	0.0942	downregulated	1	1.153	0.3157	downregulated	4	3.45291	0.0317	downregulated	5	2.89865	0.0551	downregulated	5	2.86499	0.057
protein-DNA complex assembly	GO	3 out of 7	1.9192	upregulated	18	7.79699	0.0004	upregulated	17	10.9371	1.8e-05	downregulated	11	0.997247	0.3689	upregulated	3	2.94951	0.0524	upregulated	22	7.58595	0.0005	upregulated	12	5.77194	0.0031	upregulated	16	5.40927	0.0045
integrin binding	GO	1 out of 7	1.83863	downregulated	1	0.368309	0.6919	upregulated	2	1.36247	0.256	downregulated	14	7.08954	0.0008	downregulated	11	7.14474	0.0008	downregulated	8	1.83863	0.159	downregulated	10	2.57391	0.0762	downregulated	9	2.41933	0.089
regulation of RNA polymerase II transcriptional preinitiation complex assembly	GO	3 out of 7	1.81509	upregulated	3	2.37031	0.0935	upregulated	1	1.73587	0.1762	downregulated	1	0.337971	0.7132					downregulated	1	0.678282	0.5075	upregulated	1	1.13397	0.3218	upregulated	2	1.49743	0.2237
hydrolase activity, acting on carbon-nitrogen (but not peptide) bonds, in cyclic amidines	GO	4 out of 7	1.80643	downregulated	1	1.19104	0.3039	upregulated	2	1.73616	0.1762	downregulated	3	4.89983	0.0074	downregulated	1	0.882383	0.4138	downregulated	2	2.10671	0.1216	downregulated	5	3.0482	0.0474	downregulated	3	1.88862	0.1513
positive regulation of nuclear-transcribed mRNA catabolic process, deadenylation-dependent decay	GO	4 out of 7	1.80051					upregulated	2	2.0897	0.1237	upregulated	1	1.35306	0.2584	upregulated	1	4.21049	0.0148	upregulated	2	3.07319	0.0463	downregulated	2	3.31759	0.0362	upregulated	5	6.09714	0.0022
regulation of embryonic development	GO	3 out of 7	1.77392	upregulated	8	2.5924	0.0748	upregulated	3	2.54277	0.0786	downregulated	12	2.94307	0.0527	downregulated	2	1.88963	0.1511	downregulated	11	4.75506	0.0086	upregulated	9	1.41068	0.244	upregulated	9	1.87292	0.1537
nuclear pore	GO	1 out of 7	1.76055	upregulated	5	1.96293	0.1404	downregulated	2	1.88247	0.1522	upregulated	2	0.386137	0.6797	downregulated	5	1.46038	0.2321	downregulated	9	1.76055	0.1719	downregulated	10	1.02057	0.3604	downregulated	12	1.23947	0.2895
TRAPP complex	GO	2 out of 7	1.75155					downregulated	1	1.68089	0.1862	downregulated	1	1.68173	0.1861	downregulated	1	1.99121	0.1365	downregulated	1	1.90593	0.1487	downregulated	5	6.0562	0.0023	upregulated	1	0.856741	0.4245
calcium ion transmembrane import into cytosol	GO	3 out of 7	1.74382	upregulated	3	2.53554	0.0792	downregulated	1	2.92749	0.0535	downregulated	4	2.6649	0.0696	downregulated	3	1.95362	0.1418	upregulated	4	2.94776	0.0525	downregulated	12	6.14656	0.0021	downregulated	8	3.5555	0.0286
negative regulation of cardiac muscle cell differentiation	GO	3 out of 7	1.74335	upregulated	1	1.80704	0.1641					downregulated	1	1.61973	0.198					upregulated	3	5.56745	0.0038	downregulated	3	3.08492	0.0457	downregulated	3	4.03858	0.0176
regulation of JAK-STAT cascade	GO	4 out of 7	1.72794	downregulated	4	2.17045	0.1141	downregulated	1	2.25252	0.1051	upregulated	3	0.527803	0.5899	downregulated	4	1.22322	0.2943	downregulated	8	2.50472	0.0817	downregulated	9	2.1708	0.1141	downregulated	10	2.1708	0.1141
neural precursor cell proliferation	GO	4 out of 7	1.7269	upregulated	1	1.08374	0.3383	downregulated	1	0.689777	0.5017	downregulated	9	7.50455	0.0006	downregulated	7	5.13605	0.0059	downregulated	10	6.74776	0.0012	downregulated	10	4.33519	0.0131	downregulated	8	2.89059	0.0555
clathrin-coated pit	GO	1 out of 7	1.7162	downregulated	3	2.17161	0.114	downregulated	3	1.57871	0.2062	downregulated	8	8.02582	0.0003	downregulated	7	4.66906	0.0094	downregulated	8	1.7162	0.1797	downregulated	19	12.6595	3.2e-06	upregulated	13	9.4829	7.6e-05
regulation of flagellated sperm motility	GO	1 out of 7	1.7077									upregulated	1	1.7077	0.1813
Wnt signaling pathway involved in midbrain dopaminergic neuron differentiation	GO	2 out of 7	1.70659																					downregulated	1	1.1467	0.3177	downregulated	1	0.559898	0.5713
regulation of dopaminergic neuron differentiation	GO	2 out of 7	1.69839																	upregulated	1	2.36925	0.0936	downregulated	2	1.98124	0.1379	downregulated	2	2.0864	0.1241
regulation of extrinsic apoptotic signaling pathway via death domain receptors	GO	3 out of 7	1.67903	upregulated	1	0.0162081	0.9839	upregulated	2	4.90364	0.0074	downregulated	4	1.18886	0.3046	upregulated	1	1.98648	0.1372	upregulated	5	0.624858	0.5353	upregulated	4	1.23473	0.2909	upregulated	8	2.17886	0.1132
cyclosporin A binding	GO	2 out of 7	1.66323									upregulated	1	1.19155	0.3037					upregulated	2	1.56569	0.2089	downregulated	2	1.05979	0.3465	downregulated	3	2.16913	0.1143
negative regulation of cold-induced thermogenesis	GO	3 out of 7	1.65061	downregulated	1	0.38156	0.6828	upregulated	4	6.27577	0.0019	upregulated	2	3.50401	0.0301	downregulated	3	2.60844	0.0736	downregulated	3	3.34655	0.0352	upregulated	5	4.75489	0.0086	upregulated	5	3.73083	0.024
proteasome regulatory particle	GO	1 out of 7	1.62399	upregulated	1	0.930435	0.3944	upregulated	1	1.37682	0.2524	upregulated	1	1.2396	0.2895					downregulated	2	1.62399	0.1971	downregulated	6	5.3161	0.0049	downregulated	4	2.81944	0.0596
chromosome segregation	GO	2 out of 7	1.60739	upregulated	14	1.6821	0.186	upregulated	19	7.64645	0.0005	downregulated	19	1.79309	0.1664	downregulated	9	0.841171	0.4312	upregulated	29	5.08691	0.0062	upregulated	7	0.816093	0.4422	upregulated	16	1.4192	0.2419
mismatch repair complex	GO	2 out of 7	1.5948									downregulated	1	2.16113	0.1152	downregulated	1	1.37782	0.2521	downregulated	3	4.2538	0.0142	upregulated	1	1.38087	0.2514	downregulated	3	2.26081	0.1043
regulation of plasma lipoprotein particle levels	GO	4 out of 7	1.58435	downregulated	1	0.351697	0.7035	upregulated	4	3.16975	0.042	downregulated	6	6.1729	0.0021	downregulated	5	7.25437	0.0007	downregulated	7	5.00002	0.0067	downregulated	10	2.97875	0.0509	downregulated	7	4.21481	0.0148
guanyl-nucleotide exchange factor complex	GO	2 out of 7	1.58405	upregulated	4	7.03718	0.0009	upregulated	1	3.85334	0.0212	downregulated	3	3.19295	0.0411	downregulated	1	1.74171	0.1752	upregulated	2	0.846123	0.4291	upregulated	2	1.76898	0.1705	upregulated	2	1.7567	0.1726
vesicle coat	GO	2 out of 7	1.57191	downregulated	3	3.00988	0.0493	downregulated	2	1.68126	0.1861	downregulated	5	2.87942	0.0562	downregulated	4	1.58584	0.2048	upregulated	10	2.68834	0.068	downregulated	12	8.28103	0.0003	downregulated	11	5.1356	0.0059
beta-catenin destruction complex disassembly	GO	3 out of 7	1.56205					upregulated	1	3.08654	0.0457	downregulated	2	1.26691	0.2817	downregulated	1	1.02602	0.3584	upregulated	4	2.76565	0.0629	downregulated	3	2.2081	0.1099	downregulated	2	1.326	0.2655
structural constituent of epidermis	GO	1 out of 7	1.55417													upregulated	1	2.71447	0.0662									upregulated	1	1.1603	0.3134
embryonic heart tube development	GO	4 out of 7	1.53042	upregulated	8	6.37707	0.0017	downregulated	3	5.79742	0.003	downregulated	4	2.86227	0.0571	downregulated	3	2.01387	0.1335	downregulated	8	3.70515	0.0246	downregulated	9	0.783563	0.4568	downregulated	6	1.33821	0.2623
membrane repolarization during action potential	GO	3 out of 7	1.52497					upregulated	1	1.49829	0.2235	downregulated	1	2.10689	0.1216					upregulated	4	5.49744	0.0041	downregulated	2	4.25515	0.0142	downregulated	1	3.37586	0.0342
membrane repolarization during cardiac muscle cell action potential	GO	3 out of 7	1.52497					upregulated	1	1.49829	0.2235	downregulated	1	2.10689	0.1216					upregulated	4	5.49744	0.0041	downregulated	2	4.25515	0.0142	downregulated	1	3.37586	0.0342
folic acid-containing compound metabolic process	GO	1 out of 7	1.5077	downregulated	1	0.529861	0.5887	upregulated	3	5.3727	0.0046	downregulated	5	2.83736	0.0586	downregulated	1	0.497778	0.6079	downregulated	2	4.57786	0.0103	downregulated	2	2.83719	0.0586	downregulated	2	2.36799	0.0937
water transmembrane transporter activity	GO	1 out of 7	1.50499	upregulated	1	0.776522	0.46													downregulated	1	1.50499	0.222	upregulated	2	1.94265	0.1433	upregulated	1	4.87014	0.0077
mitochondrial respiratory chain	GO	1 out of 7	1.47986	upregulated	5	1.93906	0.1438	upregulated	3	1.19407	0.303	upregulated	1	0.759201	0.468	downregulated	1	0.339459	0.7122	downregulated	4	1.47986	0.2277	downregulated	16	7.45997	0.0006	downregulated	9	3.16818	0.0421
cerebellar cortex formation	GO	2 out of 7	1.47463									downregulated	3	3.17317	0.0419					downregulated	4	5.02256	0.0066	downregulated	4	2.41827	0.0891	upregulated	3	2.79304	0.0612
cytokine activity	GO	1 out of 7	1.46945	downregulated	9	4.74326	0.0087	upregulated	3	3.59903	0.0274	downregulated	8	2.26631	0.1037	downregulated	5	2.91303	0.0543	downregulated	4	1.46945	0.2301	upregulated	8	2.77503	0.0623	upregulated	9	2.35891	0.0945
cysteine-type endopeptidase regulator activity involved in apoptotic process	GO	3 out of 7	1.4518	downregulated	2	1.46938	0.2301					upregulated	2	3.0197	0.0488	downregulated	4	3.44045	0.0321	upregulated	5	2.31735	0.0985	downregulated	7	3.28881	0.0373	downregulated	3	2.37046	0.0934
positive regulation of cellular senescence	GO	3 out of 7	1.44931	upregulated	1	1.89575	0.1502					downregulated	1	0.702052	0.4956					upregulated	2	1.60689	0.2005	downregulated	1	1.20666	0.2992	downregulated	1	0.655841	0.519
oxygen transport	GO	1 out of 7	1.43264	downregulated	1	1.90087	0.1494					downregulated	1	5.59556	0.0037					downregulated	2	8.92906	0.0001
peristalsis	GO	2 out of 7	1.4174									downregulated	2	4.35379	0.0129					downregulated	1	2.90512	0.0547	downregulated	1	2.86608	0.0569	upregulated	1	1.98266	0.1377
regulation of cardiac muscle cell action potential	GO	3 out of 7	1.39155	upregulated	1	0.470829	0.6245	downregulated	1	3.69315	0.0249	downregulated	3	2.18601	0.1124	downregulated	1	1.72908	0.1774	downregulated	2	3.31268	0.0364	downregulated	6	5.21628	0.0054	upregulated	4	3.96428	0.019
sialylation	GO	5 out of 7	1.38543	upregulated	1	2.10356	0.122	upregulated	1	2.26227	0.1041	downregulated	4	2.85892	0.0573	downregulated	2	5.12149	0.006	downregulated	3	1.61993	0.1979	downregulated	4	1.92684	0.1456	downregulated	2	1.45324	0.2338
Golgi-associated vesicle	GO	1 out of 7	1.36417	upregulated	9	4.8122	0.0081	downregulated	3	0.926358	0.396	downregulated	20	12.3701	4.2e-06	downregulated	15	16.3625	7.8e-08	downregulated	14	1.36417	0.2556	downregulated	24	3.89835	0.0203	downregulated	27	5.43233	0.0044
regulation of DNA-templated transcription, initiation	GO	3 out of 7	1.36005	upregulated	6	5.39852	0.0045	upregulated	1	0.93469	0.3927	downregulated	3	0.762778	0.4664	downregulated	3	2.48889	0.083	upregulated	6	1.66107	0.1899	upregulated	2	1.79795	0.1656	downregulated	2	1.73753	0.176
regulation of podosome assembly	GO	3 out of 7	1.34809					upregulated	1	2.41038	0.0898	downregulated	2	2.07731	0.1253	downregulated	1	1.29699	0.2734	downregulated	1	1.06247	0.3456	downregulated	1	1.13054	0.3229	downregulated	1	1.24955	0.2866
interferon-gamma production	GO	2 out of 7	1.33744					upregulated	1	1.14723	0.3175									downregulated	1	0.765145	0.4653	upregulated	1	0.574935	0.5627
membrane repolarization	GO	3 out of 7	1.32842					upregulated	1	1.36754	0.2547	downregulated	1	1.96682	0.1399					upregulated	4	5.20305	0.0055	downregulated	2	3.92356	0.0198	downregulated	1	3.20719	0.0405
regulation of odontogenesis of dentin-containing tooth	GO	1 out of 7	1.30682									downregulated	1	3.52945	0.0293					downregulated	1	4.83627	0.0079
post-embryonic animal morphogenesis	GO	1 out of 7	1.27594													downregulated	1	0.639619	0.5275	upregulated	2	1.30152	0.2721	downregulated	3	3.48053	0.0308	upregulated	1	0.263446	0.7684
alcohol catabolic process	GO	4 out of 7	1.27518	upregulated	1	0.362506	0.6959	upregulated	2	1.96052	0.1408	downregulated	2	0.834998	0.4339	upregulated	1	2.34328	0.096	upregulated	4	2.34328	0.096	downregulated	6	1.66427	0.1893	upregulated	4	1.87712	0.153
mitochondrial respiratory chain complex I	GO	1 out of 7	1.25321	upregulated	3	1.59216	0.2035	downregulated	1	1.56139	0.2098									downregulated	1	1.25321	0.2856	downregulated	9	4.64289	0.0096	downregulated	5	2.70517	0.0669
collagen binding	GO	1 out of 7	1.23968	upregulated	2	0.657321	0.5182	upregulated	1	2.91342	0.0543	downregulated	6	3.85737	0.0211	downregulated	8	8.70292	0.0002	downregulated	2	1.23968	0.2895	upregulated	4	1.82589	0.1611	downregulated	3	1.33924	0.262
chemoattractant activity	GO	3 out of 7	1.23568	downregulated	1	3.61566	0.0269	downregulated	1	1.16032	0.3134	downregulated	2	3.61566	0.0269					downregulated	1	3.08959	0.0455	downregulated	2	4.29045	0.0137	downregulated	2	2.24728	0.1057
muscle cell development	GO	4 out of 7	1.22769	upregulated	6	4.23257	0.0145	upregulated	5	1.53749	0.2149	downregulated	11	3.61303	0.027	downregulated	3	2.71703	0.0661	downregulated	7	1.85199	0.1569	upregulated	7	3.29226	0.0372	downregulated	15	3.22796	0.0396
establishment of endothelial intestinal barrier	GO	3 out of 7	1.20913					upregulated	2	1.68611	0.1852					downregulated	1	2.16044	0.1153	downregulated	2	2.02975	0.1314	upregulated	1	0.651732	0.5211	downregulated	2	0.305442	0.7368
negative regulation of sodium ion transmembrane transporter activity	GO	2 out of 7	1.18449					downregulated	1	3.41185	0.033									upregulated	1	1.70972	0.1809	downregulated	3	3.48053	0.0308	downregulated	2	2.82553	0.0593
mitochondrial outer membrane translocase complex	GO	1 out of 7	1.17187	upregulated	1	1.16271	0.3126													downregulated	1	1.17187	0.3098	downregulated	3	2.75888	0.0634	upregulated	1	1.53679	0.2151
epiboly	GO	4 out of 7	1.12309	upregulated	1	2.44657	0.0866	upregulated	2	1.307	0.2706	upregulated	1	1.81131	0.1634	downregulated	1	3.30451	0.0367	upregulated	2	0.721296	0.4861	downregulated	1	0.0357825	0.9649	upregulated	1	0.451761	0.6365
positive regulation of neural precursor cell proliferation	GO	3 out of 7	1.12088	upregulated	2	3.47942	0.0308	upregulated	2	3.13946	0.0433	downregulated	2	3.96502	0.019	upregulated	1	1.48037	0.2276	upregulated	4	2.08493	0.1243	upregulated	4	3.01738	0.0489	upregulated	5	3.01335	0.0491
mitochondrial outer membrane permeabilization	GO	2 out of 7	1.11306	downregulated	1	1.61172	0.1995													upregulated	1	1.57825	0.2063	downregulated	2	1.64142	0.1937	downregulated	2	2.66161	0.0698
tetrahydrofolate interconversion	GO	1 out of 7	1.0829					upregulated	1	6.40112	0.0017	downregulated	2	1.18189	0.3067					upregulated	3	1.39467	0.2479	upregulated	1	1.72256	0.1786	upregulated	2	1.01909	0.3609
blood coagulation, fibrin clot formation	GO	3 out of 7	1.08257					downregulated	1	1.57263	0.2075	upregulated	1	2.54621	0.0784					downregulated	1	0.377835	0.6853	upregulated	1	0.34633	0.7073	downregulated	1	0.0774885	0.9254
retina vasculature morphogenesis in camera-type eye	GO	2 out of 7	1.07932	downregulated	1	2.93825	0.053					upregulated	1	1.83239	0.16					downregulated	1	2.18517	0.1125
positive regulation of extrinsic apoptotic signaling pathway	GO	3 out of 7	1.0702	upregulated	2	0.13996	0.8694	upregulated	4	9.37475	8.5e-05	downregulated	4	0.674418	0.5095	downregulated	5	2.36099	0.0943	downregulated	5	3.40873	0.0331	upregulated	5	4.4336	0.0119	upregulated	10	4.38423	0.0125
intronic transcription regulatory region sequence-specific DNA binding	GO	4 out of 7	1.06752	upregulated	2	2.48764	0.0831	upregulated	2	3.12785	0.0438					upregulated	1	3.37486	0.0342	upregulated	1	4.94037	0.0072	downregulated	1	1.01714	0.3616	upregulated	2	3.9996	0.0183
nuclear pore central transport channel	GO	1 out of 7	1.06469					upregulated	1	2.17145	0.114									upregulated	2	1.10675	0.3306
sex determination	GO	3 out of 7	1.04393	upregulated	1	1.82788	0.1608					downregulated	1	1.44944	0.2347	downregulated	1	1.3283	0.2649	upregulated	2	2.32749	0.0975	downregulated	2	1.15467	0.3152	downregulated	3	3.16661	0.0421
one-carbon metabolic process	GO	1 out of 7	1.03964					upregulated	2	5.52658	0.004	downregulated	3	1.17936	0.3075	downregulated	1	0.590842	0.5539	upregulated	4	2.71673	0.0661	upregulated	1	1.11173	0.329	upregulated	3	0.954474	0.385
heme metabolic process	GO	4 out of 7	0.986653	upregulated	1	1.10419	0.3315	upregulated	2	1.98431	0.1375	downregulated	3	2.62736	0.0723	upregulated	1	2.05697	0.1278	upregulated	2	1.16311	0.3125	downregulated	4	1.45006	0.2346	upregulated	4	1.8184	0.1623
digestive system process	GO	4 out of 7	0.971854	upregulated	1	0.90384	0.405	upregulated	2	2.46685	0.0849	upregulated	2	1.65132	0.1918	downregulated	3	3.07524	0.0462	upregulated	6	2.09046	0.1236	downregulated	4	1.35684	0.2575	downregulated	3	0.662555	0.5155
protein disulfide oxidoreductase activity	GO	3 out of 7	0.969626									upregulated	1	0.860062	0.4231					downregulated	2	1.65326	0.1914	downregulated	2	0.561175	0.5705	upregulated	1	2.10487	0.1219
negative regulation of endoplasmic reticulum unfolded protein response	GO	3 out of 7	0.968209					upregulated	1	1.10346	0.3317	upregulated	2	3.86668	0.0209	downregulated	1	1.16589	0.3116	upregulated	2	1.1522	0.3159	downregulated	1	0.846849	0.4288	upregulated	2	2.5307	0.0796
determination of bilateral symmetry	GO	3 out of 7	0.961265	upregulated	12	8.32668	0.0002	downregulated	2	2.07053	0.1261	downregulated	6	3.88499	0.0205	upregulated	2	1.34103	0.2616	downregulated	10	2.82165	0.0595	upregulated	5	3.22953	0.0396	upregulated	7	2.34304	0.096
development of primary female sexual characteristics	GO	3 out of 7	0.958644	downregulated	3	2.36074	0.0944	upregulated	2	1.59347	0.2032	upregulated	4	2.7793	0.0621	downregulated	4	1.62113	0.1977	downregulated	6	4.62256	0.0098	upregulated	5	1.55823	0.2105	upregulated	6	2.49659	0.0824
phosphatidylserine acyl-chain remodeling	GO	2 out of 7	0.941872					downregulated	1	1.27827	0.2785	downregulated	1	1.36095	0.2564					downregulated	3	3.24631	0.0389	downregulated	4	4.06254	0.0172	upregulated	3	3.72775	0.024
cellular detoxification	GO	3 out of 7	0.894793	downregulated	2	1.04714	0.3509	upregulated	6	4.03915	0.0176	downregulated	5	6.36993	0.0017	downregulated	3	3.44958	0.0318	downregulated	6	6.40957	0.0016	downregulated	9	1.31272	0.2691	upregulated	4	0.902446	0.4056
mitochondrial electron transport, NADH to ubiquinone	GO	1 out of 7	0.893171	upregulated	2	1.00306	0.3668	downregulated	1	1.73564	0.1763									downregulated	1	0.893171	0.4094	downregulated	9	6.01558	0.0024	downregulated	5	3.35452	0.0349
negative regulation of sodium ion transmembrane transport	GO	2 out of 7	0.882969					downregulated	1	3.37961	0.0341									upregulated	1	1.68014	0.1863	downregulated	3	3.26235	0.0383	downregulated	2	2.68037	0.0685
positive regulation of sodium ion transmembrane transport	GO	3 out of 7	0.851969	upregulated	1	0.934262	0.3929					upregulated	1	2.24664	0.1058	downregulated	1	0.761699	0.4669					downregulated	3	1.22866	0.2927	upregulated	3	2.79589	0.0611
MHC class I protein complex	GO	3 out of 7	0.846511					upregulated	1	0.710201	0.4915	downregulated	2	1.76627	0.171	upregulated	1	3.53321	0.0292	downregulated	1	0.337948	0.7132	upregulated	2	1.96858	0.1397
interleukin-7-mediated signaling pathway	GO	2 out of 7	0.828727	upregulated	2	2.91178	0.0544					downregulated	2	1.12835	0.3236					upregulated	3	2.56504	0.0769	downregulated	3	2.90952	0.0545	downregulated	2	1.61259	0.1994
transmembrane receptor protein tyrosine kinase adaptor activity	GO	1 out of 7	0.823893	upregulated	1	1.95865	0.141					upregulated	1	1.55864	0.2104					downregulated	1	0.823893	0.4387	downregulated	1	0.502608	0.605	upregulated	2	2.38704	0.0919
arrestin family protein binding	GO	3 out of 7	0.810475					upregulated	1	1.19732	0.302	downregulated	1	1.42196	0.2412	downregulated	1	1.62951	0.196					downregulated	3	2.3306	0.0972	downregulated	1	0.33402	0.716
programmed necrotic cell death	GO	3 out of 7	0.776231					upregulated	2	7.4595	0.0006	downregulated	2	0.869313	0.4192	downregulated	2	2.08287	0.1246	upregulated	5	6.58387	0.0014	downregulated	3	1.98259	0.1377	downregulated	1	0.870196	0.4189
negative regulation of stem cell differentiation	GO	3 out of 7	0.757758	downregulated	2	1.78791	0.1673	upregulated	2	3.02115	0.0487	downregulated	2	0.633727	0.5306					downregulated	2	3.68948	0.025	downregulated	2	0.591491	0.5535	upregulated	4	4.12273	0.0162
cerebellar Purkinje cell layer formation	GO	2 out of 7	0.740522									downregulated	2	2.80367	0.0606					downregulated	2	2.06508	0.1268	downregulated	2	1.47911	0.2278	downregulated	2	0.988532	0.3721
calcium-dependent phospholipid binding	GO	1 out of 7	0.731126	downregulated	1	0.537544	0.5842					upregulated	1	0.437089	0.6459	downregulated	2	0.765376	0.4652	downregulated	3	0.731126	0.4814	downregulated	13	11.3902	1.1e-05	downregulated	9	11.0671	1.6e-05
cell aggregation	GO	2 out of 7	0.718301	downregulated	1	1.15639	0.3146	upregulated	1	2.90243	0.0549	downregulated	1	0.2196	0.8028					upregulated	1	0.262285	0.7693	downregulated	1	0.16612	0.8469	upregulated	1	0.711973	0.4907
polyol metabolic process	GO	3 out of 7	0.69482	downregulated	4	4.66815	0.0094	upregulated	2	1.99457	0.1361	downregulated	9	6.89577	0.001	downregulated	5	3.76264	0.0232	upregulated	12	4.75854	0.0086	downregulated	18	6.19771	0.002	downregulated	19	7.8291	0.0004
response to fibroblast growth factor	GO	3 out of 7	0.694024	upregulated	9	4.48413	0.0113	upregulated	5	1.47745	0.2282	upregulated	7	4.07059	0.0171	downregulated	4	2.74357	0.0643	upregulated	13	3.49035	0.0305	downregulated	10	3.93274	0.0196	upregulated	13	6.59457	0.0014
specific granule lumen	GO	5 out of 7	0.692461	upregulated	3	1.69494	0.1836	upregulated	1	0.744801	0.4748	downregulated	4	2.05395	0.1282	downregulated	4	4.34455	0.013	downregulated	5	1.88898	0.1512	downregulated	5	1.30515	0.2711	downregulated	6	1.45707	0.2329
vitamin transmembrane transporter activity	GO	3 out of 7	0.687426	upregulated	1	1.77468	0.1695	downregulated	1	1.06991	0.343	downregulated	1	0.259254	0.7716					upregulated	4	2.47592	0.0841	downregulated	3	1.35175	0.2588	downregulated	2	1.36608	0.2551
leukotriene D4 biosynthetic process	GO	1 out of 7	0.675939					upregulated	1	2.85468	0.0576	downregulated	1	1.1116	0.329									upregulated	1	1.06714	0.344
Golgi stack	GO	1 out of 7	0.652159	upregulated	5	1.93358	0.1446	upregulated	4	1.07241	0.3422	upregulated	5	2.83178	0.0589	downregulated	5	1.13697	0.3208	downregulated	8	0.652159	0.5209	downregulated	22	5.59955	0.0037	downregulated	24	10.4809	2.8e-05
Golgi transport complex	GO	2 out of 7	0.628621					downregulated	1	5.1454	0.0058	downregulated	1	0.684802	0.5042					upregulated	2	1.90746	0.1485	downregulated	3	3.61611	0.0269	downregulated	4	4.75017	0.0087
dystrophin-associated glycoprotein complex	GO	3 out of 7	0.627147	upregulated	2	1.22604	0.2935	upregulated	1	1.37682	0.2524	downregulated	2	0.870935	0.4186	downregulated	1	1.3731	0.2533	downregulated	3	2.8923	0.0554	upregulated	1	1.26292	0.2828	upregulated	3	1.36106	0.2564
mesenchymal cell development	GO	4 out of 7	0.617913	downregulated	4	1.8744	0.1534	upregulated	2	3.72084	0.0242	downregulated	12	11.3768	1.1e-05	downregulated	3	0.992012	0.3708	downregulated	6	3.02891	0.0484	downregulated	10	3.30599	0.0367	downregulated	8	4.80538	0.0082
spindle elongation	GO	3 out of 7	0.61307	upregulated	1	0.875201	0.4168	upregulated	1	4.47555	0.0114	downregulated	1	0.717273	0.4881	downregulated	1	1.18101	0.307	upregulated	2	3.88003	0.0207					downregulated	2	1.04064	0.3532
regulation of cerebellar granule cell precursor proliferation	GO	1 out of 7	0.601194																									downregulated	1	0.601194	0.5482
phosphatase binding	GO	4 out of 7	0.57465	downregulated	8	2.36931	0.0935	upregulated	3	1.58081	0.2058	downregulated	16	4.05684	0.0173	downregulated	7	2.30761	0.0995	downregulated	11	2.71831	0.066	downregulated	23	2.87146	0.0566	downregulated	19	2.13784	0.1179
structural constituent of nuclear pore	GO	5 out of 7	0.564995	upregulated	1	0.344601	0.7085	upregulated	1	0.649471	0.5223	downregulated	3	1.331	0.2642	downregulated	4	4.34835	0.0129	downregulated	2	2.71934	0.0659	downregulated	2	1.14985	0.3167	downregulated	2	1.38109	0.2513
ATP-dependent helicase activity	GO	3 out of 7	0.555504	upregulated	1	0.0800098	0.9231	upregulated	6	4.89125	0.0075	downregulated	4	0.331808	0.7176	downregulated	3	1.07495	0.3413	upregulated	7	3.19884	0.0408	downregulated	5	0.787702	0.4549	upregulated	5	0.597862	0.55
extrinsic component of plasma membrane	GO	3 out of 7	0.541054	upregulated	7	5.96557	0.0026	upregulated	4	4.96349	0.007	downregulated	10	4.89048	0.0075	downregulated	12	5.36083	0.0047	upregulated	13	2.93546	0.0531	downregulated	24	7.96303	0.0003	upregulated	14	5.16427	0.0057
regulation of NLRP3 inflammasome complex assembly	GO	1 out of 7	0.532197					upregulated	1	4.04199	0.0176	downregulated	1	1.50557	0.2219									upregulated	1	1.17787	0.3079	upregulated	1	0.826346	0.4376
parturition	GO	3 out of 7	0.525718									upregulated	2	2.71759	0.066	upregulated	1	2.49813	0.0822	upregulated	1	0.82887	0.4365	downregulated	2	1.4731	0.2292	upregulated	2	5.33423	0.0048
regulation of glial cell migration	GO	1 out of 7	0.513961					upregulated	2	10.6044	2.5e-05	downregulated	1	1.97628	0.1386	downregulated	1	1.99493	0.136	upregulated	1	2.40981	0.0898	upregulated	1	1.47903	0.2279	upregulated	2	2.23035	0.1075
excretion	GO	2 out of 7	0.468868					downregulated	1	2.31471	0.0988	upregulated	4	4.88257	0.0076	downregulated	2	1.6762	0.1871	upregulated	1	0.137465	0.8716	upregulated	3	0.989012	0.3719	downregulated	2	0.703687	0.4948
mitochondrial tRNA processing	GO	2 out of 7	0.452483					upregulated	1	1.94202	0.1434					downregulated	1	1.31589	0.2682	upregulated	1	0.811595	0.4441	downregulated	1	0.637947	0.5284
protein kinase complex	GO	3 out of 7	0.436286	upregulated	8	3.20505	0.0406	upregulated	5	4.7877	0.0083	downregulated	10	2.00647	0.1345	downregulated	6	1.33196	0.264	upregulated	16	3.2889	0.0373	downregulated	12	1.29543	0.2738	upregulated	9	2.22457	0.1081
intermediate filament	GO	1 out of 7	0.427896	downregulated	2	0.938055	0.3914	downregulated	1	1.02395	0.3592	upregulated	2	1.64129	0.1937	upregulated	3	2.50164	0.082	downregulated	3	0.427896	0.6519	downregulated	8	3.95652	0.0191	downregulated	8	5.95147	0.0026
xenobiotic metabolic process	GO	3 out of 7	0.427284	upregulated	4	0.498111	0.6077	upregulated	1	0.0780723	0.9249	downregulated	5	0.398796	0.6711	upregulated	2	1.88269	0.1522	upregulated	5	1.63279	0.1954	upregulated	5	1.62462	0.197	upregulated	6	2.64007	0.0714
cell aging	GO	3 out of 7	0.396255	upregulated	3	1.96948	0.1395	upregulated	3	1.65623	0.1909	downregulated	4	1.04978	0.35	downregulated	2	1.21989	0.2953	upregulated	8	1.87729	0.153	downregulated	4	0.917496	0.3995	downregulated	3	1.05644	0.3477
protein localization to membrane	GO	4 out of 7	0.390861	upregulated	28	5.12112	0.006	upregulated	14	2.22671	0.1079	downregulated	29	2.74162	0.0645	downregulated	18	3.91747	0.0199	downregulated	34	7.24283	0.0007	downregulated	76	23.056	9.7e-11	upregulated	75	30.5967	5.2e-14
embryonic organ development	GO	3 out of 7	0.329895	downregulated	14	2.90766	0.0546	downregulated	6	2.3517	0.0952	downregulated	27	3.36347	0.0346	downregulated	16	1.3741	0.2531	downregulated	24	3.28607	0.0374	downregulated	30	3.86167	0.021	downregulated	21	3.17908	0.0416
positive regulation of glycoprotein metabolic process	GO	4 out of 7	0.319449	upregulated	1	0.743321	0.4755	upregulated	1	0.67255	0.5104					upregulated	1	1.57847	0.2063	upregulated	2	2.49615	0.0824	downregulated	2	1.18801	0.3048	upregulated	2	1.36675	0.2549
regulation of bile acid metabolic process	GO	3 out of 7	0.304827									upregulated	1	4.19681	0.015	downregulated	1	1.99136	0.1365	upregulated	2	3.90813	0.0201	downregulated	2	0.998366	0.3685	downregulated	2	1.00915	0.3645
intramolecular oxidoreductase activity	GO	4 out of 7	0.304573	downregulated	1	1.30421	0.2714	upregulated	2	1.74368	0.1749	upregulated	2	1.25655	0.2846	downregulated	1	1.76015	0.172	downregulated	3	1.39804	0.2471	upregulated	3	1.9921	0.1364	downregulated	4	0.962749	0.3818
site of double-strand break	GO	4 out of 7	0.304108	upregulated	3	1.29758	0.2732	upregulated	3	1.60264	0.2014	upregulated	1	0.382569	0.6821	downregulated	4	3.1538	0.0427	upregulated	3	0.199279	0.8193	upregulated	1	0.166613	0.8465	downregulated	4	0.541012	0.5822
regulation of neuroblast proliferation	GO	4 out of 7	0.296501	downregulated	2	3.48201	0.0307	upregulated	3	6.04625	0.0024	upregulated	1	1.11932	0.3265	upregulated	1	1.83164	0.1602	downregulated	2	2.03012	0.1313	upregulated	4	4.58679	0.0102	upregulated	3	2.66203	0.0698
flagellated sperm motility	GO	3 out of 7	0.269635	upregulated	2	0.412849	0.6618	upregulated	3	1.11687	0.3273	downregulated	1	0.135962	0.8729	downregulated	1	0.204329	0.8152	downregulated	3	0.996137	0.3693	upregulated	3	1.625	0.1969	upregulated	2	0.290928	0.7476
entrainment of circadian clock	GO	4 out of 7	0.252269	upregulated	1	0.391579	0.676	upregulated	2	1.11751	0.3271	upregulated	2	2.90205	0.0549	upregulated	1	2.21249	0.1094	upregulated	6	3.38658	0.0338	upregulated	2	0.639953	0.5273	upregulated	5	2.34483	0.0959
oocyte differentiation	GO	2 out of 7	0.242427	downregulated	1	0.566302	0.5676	downregulated	1	0.800429	0.4491	upregulated	1	5.78482	0.0031	downregulated	3	2.51066	0.0812	upregulated	3	1.08685	0.3373	downregulated	3	1.49061	0.2252	upregulated	4	2.06876	0.1263
positive regulation of transcription of nucleolar large rRNA by RNA polymerase I	GO	3 out of 7	0.229548					upregulated	1	1.1008	0.3326	downregulated	1	0.612888	0.5418	downregulated	1	1.11093	0.3293	upregulated	3	4.90469	0.0074	downregulated	3	3.29327	0.0371	downregulated	2	2.46399	0.0851
sperm motility	GO	3 out of 7	0.222186	upregulated	2	0.378756	0.6847	upregulated	3	1.04541	0.3515	downregulated	1	0.123359	0.8839	downregulated	1	0.188166	0.8285	downregulated	3	0.916393	0.4	upregulated	3	1.54141	0.2141	upregulated	2	0.265444	0.7669
phosphate ion binding	GO	2 out of 7	0.218007									downregulated	1	0.889286	0.4109					upregulated	1	1.58521	0.2049	downregulated	1	0.992319	0.3707	downregulated	1	1.70018	0.1827
positive regulation of G1/S transition of mitotic cell cycle	GO	4 out of 7	0.193989	downregulated	1	0.581792	0.5589	downregulated	1	2.29813	0.1004	upregulated	1	1.19647	0.3023	upregulated	1	1.27759	0.2787	upregulated	4	2.4066	0.0901	downregulated	5	1.49946	0.2233	downregulated	5	1.50698	0.2216
positive regulation of protein acetylation	GO	3 out of 7	0.187755	downregulated	1	2.00947	0.1341	upregulated	3	3.0957	0.0452	upregulated	1	0.488267	0.6137					upregulated	5	1.46583	0.2309	downregulated	4	1.02638	0.3583	upregulated	3	0.947289	0.3878
negative regulation of protein localization to cell surface	GO	3 out of 7	0.145706	downregulated	1	1.75511	0.1729	upregulated	2	3.46663	0.0312					downregulated	1	1.06029	0.3464	downregulated	1	0.877371	0.4159	downregulated	1	0.26069	0.7705	upregulated	1	1.64358	0.1933
positive regulation of extrinsic apoptotic signaling pathway via death domain receptors	GO	2 out of 7	0.13182									upregulated	1	1.09048	0.3361	upregulated	1	2.93877	0.0529	upregulated	1	1.40201	0.2461	upregulated	1	1.20741	0.299	upregulated	3	1.28802	0.2758
calcineurin-mediated signaling	GO	2 out of 7	0.0980813	downregulated	1	1.58623	0.2047					upregulated	1	2.95299	0.0522	downregulated	1	1.33574	0.263	upregulated	2	1.62869	0.1962	downregulated	1	1.62637	0.1966	downregulated	1	1.69576	0.1835
proteasome core complex, beta-subunit complex	GO	3 out of 7	0.0910006									downregulated	2	2.31471	0.0988	downregulated	1	1.83497	0.1596	downregulated	2	2.93444	0.0532	downregulated	1	0.649443	0.5223	downregulated	1	0.65679	0.5185
preribosome	GO	2 out of 7	0.0879967	upregulated	2	0.371569	0.6897	upregulated	4	2.63338	0.0718									downregulated	5	0.858226	0.4239	upregulated	1	1.1418	0.3192	upregulated	5	1.25293	0.2857
desmosome organization	GO	2 out of 7	0.0839277	upregulated	1	2.01684	0.1331					downregulated	1	1.25852	0.2841					upregulated	1	0.416514	0.6593	downregulated	1	0.595884	0.5511	upregulated	1	0.853755	0.4258
estrous cycle	GO	2 out of 7	0.0726059	upregulated	1	1.28865	0.2756	upregulated	2	4.79189	0.0083	downregulated	1	3.05205	0.0473					upregulated	1	0.702666	0.4953	upregulated	1	1.96218	0.1406	upregulated	1	2.25322	0.1051
positive regulation of TORC1 signaling	GO	3 out of 7	0.022107	downregulated	1	2.02457	0.1321	upregulated	1	2.81129	0.0601					downregulated	2	3.22903	0.0396	upregulated	1	1.71936	0.1792	downregulated	2	1.49834	0.2235	downregulated	3	2.68543	0.0682
thyroid hormone receptor binding	GO	3 out of 7	0.0218678					upregulated	1	0.704884	0.4942	downregulated	3	0.716968	0.4882	upregulated	2	4.32163	0.0133	upregulated	5	4.01642	0.018	downregulated	3	0.30927	0.734	upregulated	3	0.58052	0.5596
anterior/posterior axis specification	GO	3 out of 7	0.0185772	upregulated	2	1.091	0.3359					downregulated	3	1.92614	0.1457	downregulated	1	0.506411	0.6027	upregulated	4	1.2536	0.2855	downregulated	5	1.4053	0.2453	downregulated	5	1.20843	0.2987
cation-transporting ATPase complex	GO	1 out of 7	0.0108226																					downregulated	1	1.76311	0.1715	upregulated	1	1.75229	0.1734
