# Supplementary material for: Physical Activity Rewires the Human Brain against Neurodegeneration
Source: Int J Mol Sci. 2022 Jun 2;23(11):6223. doi: 10.3390/ijms23116223 (PMC9181322; doi:10.3390/ijms23116223)
Supplement: Supplementary file 1 [file ijms-23-06223-s001.zip › Table S13.xlsx]

## Sheet: Sheet1
Table S13. Functional analysis of genes downregulated in physically active subjects and upregulated in Parkinson's disease datasets
Bioset 1: Hippocampi from 76-99yr old female subjects with high physical activity levels _vs_ low (Study: Hippocampi from post-mortem brains of subjects with low, moderate, or high physical activity levels)
Bioset 2: Hippocampi from 76-99yr old female subjects with moderate physical activity levels _vs_ low (Study: Hippocampi from post-mortem brains of subjects with low, moderate, or high physical activity levels)
Bioset 3: Hippocampi from 78-101yr old male subjects with high physical activity levels _vs_ low (Study: Hippocampi from post-mortem brains of subjects with low, moderate, or high physical activity levels)
Bioset 4: Hippocampi from 78-101yr old male subjects with moderate physical activity levels _vs_ low (Study: Hippocampi from post-mortem brains of subjects with low, moderate, or high physical activity levels)
Bioset 5: Substantia nigrae from postmortem brain - Parkinson's disease patients _vs_ normal (Study: Substantia nigrae from brains of Parkinson's disease patients)
Bioset 6: Lateral substantia nigra from Parkinson's disease patients _vs_ normal donors (Study: Substantia nigra and frontal gyrus brain regions in Parkinson's disease patients)
Bioset 7: Medial substantia nigra from Parkinson's disease patients _vs_ normal donors (Study: Substantia nigra and frontal gyrus brain regions in Parkinson's disease patients)
Biogroup	Source	Specificity	Overall Biogroup score	Correlated direction - Bioset 1	Common genes - Bioset 1	Score - Bioset 1	p-value - Bioset 1	Correlated direction - Bioset 2	Common genes - Bioset 2	Score - Bioset 2	p-value - Bioset 2	Correlated direction - Bioset 3	Common genes - Bioset 3	Score - Bioset 3	p-value - Bioset 3	Correlated direction - Bioset 4	Common genes - Bioset 4	Score - Bioset 4	p-value - Bioset 4	Correlated direction - Bioset 5	Common genes - Bioset 5	Score - Bioset 5	p-value - Bioset 5	Correlated direction - Bioset 6	Common genes - Bioset 6	Score - Bioset 6	p-value - Bioset 6	Correlated direction - Bioset 7	Common genes - Bioset 7	Score - Bioset 7	p-value - Bioset 7
leukocyte degranulation	GO	4 out of 7	85.5905	downregulated	6	0.519363	0.5949	upregulated	25	4.61489	0.0099	downregulated	59	30.4946	5.7e-14	downregulated	60	66.9198	8.7e-30	downregulated	47	11.9323	6.6e-06	downregulated	63	6.3118	0.0018	upregulated	45	4.20388	0.0149
negative regulation of growth	GO	6 out of 7	73.9642	downregulated	9	2.17313	0.1138	downregulated	4	3.71128	0.0244	downregulated	26	9.01304	0.0001	upregulated	5	3.10272	0.0449	upregulated	33	13.2004	1.8e-06	upregulated	33	23.2597	7.9e-11	upregulated	37	25.7093	6.8e-12
axon ensheathment	GO	5 out of 7	73.1642	upregulated	1	2.57059	0.0765	downregulated	3	2.22616	0.1079	downregulated	26	34.0671	1.6e-15	downregulated	11	10.836	2e-05	upregulated	8	3.97471	0.0188	upregulated	17	11.8181	7.4e-06	upregulated	19	16.7874	5.1e-08
myelination	GO	4 out of 7	71.0447	upregulated	1	2.61705	0.073	upregulated	2	0.881783	0.414	downregulated	26	34.7313	8.2e-16	downregulated	11	11.1437	1.4e-05	upregulated	8	4.00655	0.0182	upregulated	16	11.1843	1.4e-05	upregulated	19	17.4843	2.6e-08
transcriptional repressor activity, RNA polymerase II transcription regulatory region sequence-specific DNA binding	GO	7 out of 7	68.3181	downregulated	7	0.563373	0.5693	downregulated	12	8.55513	0.0002	downregulated	22	2.78566	0.0617	downregulated	19	4.47884	0.0113	upregulated	56	32.46	8e-15	upregulated	25	3.72982	0.024	upregulated	39	15.7452	1.5e-07
regulation of cellular response to heat	GO	5 out of 7	66.8291	upregulated	5	6.49103	0.0015	upregulated	1	0.630979	0.5321	downregulated	3	2.41414	0.0894	downregulated	3	3.68687	0.0251	upregulated	17	28.0741	6.4e-13	upregulated	10	21.0032	7.6e-10	upregulated	9	18.7727	7e-09
stress response to copper ion	GO	4 out of 7	66.1957													downregulated	1	2.51399	0.0809	upregulated	1	2.17502	0.1136	upregulated	10	32.6617	6.5e-15	upregulated	9	28.845	3e-13
inflammatory response	GO	4 out of 7	64.5098	downregulated	14	2.78345	0.0618	upregulated	9	3.8379	0.0215	downregulated	46	19.6906	2.8e-09	downregulated	33	37.1568	7.3e-17	upregulated	29	8.71684	0.0002	upregulated	26	2.57158	0.0764	upregulated	28	11.5674	9.5e-06
establishment of protein localization to endoplasmic reticulum	GO	4 out of 7	64.0364	upregulated	3	0.0736638	0.929	downregulated	1	2.36038	0.0944	upregulated	2	0.200435	0.8184	upregulated	1	1.15826	0.314	upregulated	8	0.937471	0.3916	upregulated	14	11.6433	8.8e-06	upregulated	39	50.5276	1.1e-22
glial cell differentiation	GO	6 out of 7	63.4833	downregulated	4	1.42211	0.2412	upregulated	4	1.31221	0.2692	downregulated	31	31.9491	1.3e-14	downregulated	10	3.89301	0.0204	upregulated	18	4.10521	0.0165	upregulated	23	9.72487	6e-05	upregulated	34	13.7011	1.1e-06
protein targeting to ER	GO	3 out of 7	61.052	upregulated	2	0.0264677	0.9739	upregulated	2	0.152463	0.8586	upregulated	2	0.229742	0.7947	upregulated	1	1.20243	0.3005	upregulated	7	1.06346	0.3453	upregulated	12	9.45398	7.8e-05	upregulated	39	52.1456	2.3e-23
regulation of bone remodeling	GO	6 out of 7	60.9263	downregulated	1	0.662282	0.5157					downregulated	6	11.9303	6.6e-06	downregulated	5	9.99446	4.6e-05	upregulated	4	4.52858	0.0108	upregulated	7	14.7122	4.1e-07	upregulated	6	19.0984	5.1e-09
lymphocyte activation	GO	6 out of 7	58.2092	downregulated	13	2.24178	0.1063	upregulated	7	1.96475	0.1402	downregulated	40	20.7237	1e-09	downregulated	29	19.4164	3.7e-09	upregulated	38	8.23748	0.0003	upregulated	17	2.56468	0.0769	upregulated	29	6.98995	0.0009
stress response to metal ion	GO	4 out of 7	57.7479					upregulated	1	4.92988	0.0072	upregulated	1	2.81888	0.0597	downregulated	1	2.32051	0.0982	upregulated	1	2.03067	0.1312	upregulated	10	29.9885	9.5e-14	upregulated	10	31.1569	2.9e-14
heat shock protein binding	GO	4 out of 7	57.0705	downregulated	2	2.34012	0.0963	upregulated	3	2.23743	0.1067	downregulated	8	3.83648	0.0216	upregulated	1	3.42617	0.0325	upregulated	25	16.6585	5.8e-08	upregulated	14	22.8122	1.2e-10	upregulated	15	16.0008	1.1e-07
gliogenesis	GO	6 out of 7	56.0853	downregulated	4	1.24104	0.2891	upregulated	6	4.37552	0.0126	downregulated	34	29.1351	2.2e-13	downregulated	12	3.3522	0.035	upregulated	23	5.3081	0.005	upregulated	26	9.28312	9.3e-05	upregulated	37	12.1413	5.3e-06
positive regulation of leukocyte cell-cell adhesion	GO	7 out of 7	54.7662	downregulated	8	1.95585	0.1414	downregulated	4	3.76929	0.0231	downregulated	26	14.514	5e-07	downregulated	20	23.9426	4e-11	upregulated	15	3.13192	0.0436	upregulated	12	2.31268	0.099	upregulated	17	5.1399	0.0059
positive regulation of cellular component movement	GO	6 out of 7	54.1541	downregulated	14	5.18043	0.0056	upregulated	16	5.48183	0.0042	downregulated	47	14.9477	3.2e-07	downregulated	27	8.12187	0.0003	upregulated	52	7.87527	0.0004	upregulated	28	4.17912	0.0153	upregulated	59	19.3315	4e-09
regulation of vasculature development	GO	6 out of 7	51.1732	downregulated	11	5.26791	0.0052	upregulated	8	4.23607	0.0145	downregulated	29	14.1314	7.3e-07	downregulated	17	11.6943	8.3e-06	upregulated	36	5.35622	0.0047	upregulated	22	4.56604	0.0104	upregulated	39	14.3934	5.6e-07
myeloid cell differentiation	GO	7 out of 7	50.3715	downregulated	6	4.02173	0.0179	downregulated	2	3.79939	0.0224	downregulated	23	10.435	2.9e-05	downregulated	15	10.2073	3.7e-05	upregulated	29	7.36403	0.0006	upregulated	12	4.78878	0.0083	upregulated	19	9.75532	5.8e-05
positive regulation of cell motility	GO	6 out of 7	50.1798	downregulated	14	5.25652	0.0052	upregulated	16	5.63097	0.0036	downregulated	46	14.8709	3.5e-07	downregulated	27	8.43898	0.0002	upregulated	50	6.19175	0.002	upregulated	27	4.34994	0.0129	upregulated	57	16.7026	5.6e-08
negative regulation of cell growth	GO	5 out of 7	49.6749	upregulated	9	1.12654	0.3242	downregulated	4	4.32186	0.0133	downregulated	18	8.32571	0.0002	upregulated	4	2.62848	0.0722	upregulated	25	10.9966	1.7e-05	upregulated	23	13.26	1.7e-06	upregulated	24	16.5258	6.7e-08
regulation of substrate adhesion-dependent cell spreading	GO	7 out of 7	49.5319	downregulated	5	7.27091	0.0007	downregulated	1	3.46815	0.0312	downregulated	13	16.3212	8.2e-08	downregulated	6	5.90183	0.0027	upregulated	7	2.01445	0.1334	upregulated	5	7.64269	0.0005	upregulated	8	6.91263	0.001
regulation of angiogenesis	GO	6 out of 7	48.6141	downregulated	10	5.93228	0.0027	upregulated	7	4.66838	0.0094	downregulated	26	13.8144	1e-06	downregulated	14	11.9573	6.4e-06	upregulated	31	4.82355	0.008	upregulated	18	4.076	0.017	upregulated	34	12.6789	3.1e-06
blood vessel morphogenesis	GO	6 out of 7	48.0388	downregulated	13	2.4238	0.0886	upregulated	13	3.48882	0.0305	downregulated	45	19.0097	5.5e-09	downregulated	28	9.91303	5e-05	upregulated	37	6.68014	0.0013	upregulated	27	6.22507	0.002	upregulated	36	7.27592	0.0007
glial cell development	GO	5 out of 7	47.1832	upregulated	1	0.272221	0.7617	upregulated	2	1.61026	0.1998	downregulated	19	25.3073	1e-11	downregulated	8	4.94178	0.0071	upregulated	8	0.458331	0.6323	upregulated	14	6.50159	0.0015	upregulated	18	11.8567	7.1e-06
ensheathment of neurons	GO	3 out of 7	44.5587	upregulated	1	2.57059	0.0765	downregulated	3	2.22616	0.1079	downregulated	26	34.0671	1.6e-15	downregulated	11	10.836	2e-05	upregulated	8	3.97471	0.0188	upregulated	17	11.8181	7.4e-06	upregulated	19	16.7874	5.1e-08
regulation of lymphocyte activation	GO	6 out of 7	42.8647	upregulated	7	1.42777	0.2398	downregulated	6	2.22099	0.1085	downregulated	46	16.7567	5.3e-08	downregulated	28	18.5696	8.6e-09	upregulated	34	2.31024	0.0992	upregulated	22	1.23779	0.29	upregulated	34	3.19715	0.0409
positive regulation of substrate adhesion-dependent cell spreading	GO	6 out of 7	42.1918	downregulated	4	6.56113	0.0014	downregulated	1	3.847	0.0213	downregulated	10	15.5946	1.7e-07	downregulated	4	5.62161	0.0036	downregulated	3	1.43814	0.2374	upregulated	4	6.19862	0.002	upregulated	6	5.80705	0.003
gene silencing	GO	6 out of 7	42.0923	downregulated	1	0.0388932	0.9619	upregulated	6	1.37267	0.2534	downregulated	17	3.29058	0.0372	downregulated	12	5.07531	0.0062	upregulated	29	18.4013	1e-08	upregulated	10	1.4467	0.2353	upregulated	23	15.2121	2.5e-07
T cell activation	GO	6 out of 7	41.2168	downregulated	7	2.3075	0.0995	upregulated	5	2.85715	0.0574	downregulated	25	13.8299	9.9e-07	downregulated	17	13.2904	1.7e-06	upregulated	21	6.7016	0.0012	upregulated	10	3.83029	0.0217	upregulated	16	4.11428	0.0163
chaperone binding	GO	6 out of 7	41.2068	upregulated	5	1.35385	0.2582	downregulated	2	0.515961	0.5969	downregulated	8	3.7505	0.0235	downregulated	2	0.241805	0.7852	upregulated	17	10.8797	1.9e-05	upregulated	13	18.3686	1.1e-08	upregulated	14	8.80414	0.0002
peptide antigen binding	GO	4 out of 7	40.8273	upregulated	1	6.57729	0.0014	upregulated	1	0.809985	0.4449	downregulated	9	21.5123	4.5e-10	downregulated	7	26.2539	4e-12	downregulated	2	0.440478	0.6437	upregulated	2	0.829933	0.4361	upregulated	1	0.0589438	0.9428
myeloid cell development	GO	6 out of 7	40.015	downregulated	1	2.21519	0.1091					downregulated	8	5.95433	0.0026	downregulated	7	10.5515	2.6e-05	upregulated	6	10.2518	3.5e-05	upregulated	6	4.23353	0.0145	upregulated	5	6.80867	0.0011
negative regulation of mitotic cell cycle phase transition	GO	5 out of 7	39.451	upregulated	7	1.3569	0.2575	upregulated	6	1.2668	0.2817	downregulated	23	12.7767	2.8e-06	downregulated	17	9.16475	0.0001	upregulated	28	13.4965	1.4e-06	upregulated	9	2.69078	0.0678	upregulated	19	3.94587	0.0193
external side of plasma membrane	GO	6 out of 7	39.2637	downregulated	6	1.10836	0.3301	upregulated	7	4.81451	0.0081	downregulated	24	10.8146	2e-05	downregulated	18	11.4965	1e-05	upregulated	15	5.37127	0.0046	upregulated	22	5.68063	0.0034	upregulated	17	9.60686	6.7e-05
regulation of peptidyl-tyrosine phosphorylation	GO	6 out of 7	38.9476	downregulated	5	1.45844	0.2326	upregulated	8	1.47955	0.2277	downregulated	20	9.36801	8.5e-05	downregulated	21	14.8109	3.7e-07	upregulated	25	6.02119	0.0024	upregulated	15	5.00804	0.0067	upregulated	20	3.76056	0.0233
regulation of hemopoiesis	GO	5 out of 7	38.7096	upregulated	7	0.909335	0.4028	upregulated	8	3.37372	0.0343	downregulated	38	7.87607	0.0004	downregulated	23	9.84954	5.3e-05	upregulated	44	9.63413	6.5e-05	upregulated	23	5.05878	0.0064	upregulated	41	10.5742	2.6e-05
cardiovascular system development	GO	6 out of 7	38.6683	downregulated	17	2.50308	0.0818	upregulated	16	2.65822	0.0701	downregulated	50	14.6237	4.5e-07	downregulated	32	8.42516	0.0002	upregulated	47	6.24242	0.0019	upregulated	34	4.3681	0.0127	upregulated	46	5.16411	0.0057
defense response to Gram-positive bacterium	GO	6 out of 7	38.6106	downregulated	1	0.330568	0.7185	upregulated	1	2.56722	0.0767	downregulated	9	9.98003	4.6e-05	downregulated	8	13.955	8.7e-07	upregulated	4	2.73104	0.0652	upregulated	5	7.49863	0.0006	upregulated	7	6.68252	0.0013
amyloid-beta clearance	GO	5 out of 7	38.248									downregulated	4	11.0243	1.6e-05	downregulated	4	15.5365	1.8e-07	upregulated	2	4.57333	0.0103	upregulated	1	1.67501	0.1873	upregulated	3	5.43893	0.0043
defense response to bacterium	GO	6 out of 7	37.7737	downregulated	7	2.35511	0.0949	upregulated	6	5.76537	0.0031	downregulated	17	10.7125	2.2e-05	downregulated	14	15.5562	1.8e-07	upregulated	10	2.84401	0.0582	upregulated	11	3.61242	0.027	upregulated	14	8.45879	0.0002
protein acetyltransferase complex	GO	5 out of 7	37.6425	upregulated	7	2.25375	0.105	upregulated	5	2.23726	0.1068	downregulated	7	1.69277	0.184	downregulated	1	0.0215252	0.9787	upregulated	28	30.7	4.6e-14	upregulated	11	5.21681	0.0054	upregulated	13	4.50242	0.0111
signal transduction by p53 class mediator	GO	6 out of 7	37.0562	downregulated	1	1.66193	0.1898	upregulated	5	1.99019	0.1367	downregulated	12	4.45862	0.0116	downregulated	6	2.20759	0.11	upregulated	22	8.71693	0.0002	upregulated	12	12.0161	6e-06	upregulated	17	9.98524	4.6e-05
cellular response to starvation	GO	6 out of 7	36.9675	downregulated	3	4.29671	0.0136	upregulated	4	1.64591	0.1928	downregulated	13	4.57506	0.0103	downregulated	10	6.46741	0.0016	upregulated	22	7.57932	0.0005	upregulated	10	6.14375	0.0021	upregulated	16	9.5512	7.1e-05
lymphocyte differentiation	GO	6 out of 7	36.834	downregulated	8	1.59258	0.2034	upregulated	3	2.78424	0.0618	downregulated	27	11.9609	6.4e-06	downregulated	14	8.79026	0.0002	upregulated	30	8.40536	0.0002	upregulated	10	1.9906	0.1366	upregulated	21	6.87856	0.001
steroid metabolic process	GO	5 out of 7	36.7356	upregulated	5	0.129132	0.8789	upregulated	10	3.94359	0.0194	downregulated	19	9.47326	7.7e-05	downregulated	22	16.7107	5.5e-08	upregulated	21	3.92934	0.0197	upregulated	19	5.61409	0.0036	upregulated	23	5.08098	0.0062
transcriptional repressor activity, RNA polymerase II proximal promoter sequence-specific DNA binding	GO	6 out of 7	36.4413	downregulated	4	0.521564	0.5936	downregulated	6	3.73324	0.0239	downregulated	13	1.93184	0.1449	downregulated	11	2.89666	0.0552	upregulated	34	19.5822	3.1e-09	downregulated	9	1.82353	0.1615	upregulated	24	9.59932	6.8e-05
regulation of gliogenesis	GO	5 out of 7	36.4224	downregulated	2	1.58668	0.2046	upregulated	6	6.20511	0.002	downregulated	18	18.8089	6.8e-09	downregulated	10	6.02152	0.0024	upregulated	14	5.18688	0.0056	upregulated	8	5.14306	0.0058	upregulated	18	11.0674	1.6e-05
unfolded protein binding	GO	5 out of 7	35.818	upregulated	5	1.50343	0.2224	upregulated	3	1.93852	0.1439	downregulated	6	0.851469	0.4268	downregulated	2	0.355616	0.7007	upregulated	21	11.6962	8.3e-06	upregulated	15	18.4089	1e-08	upregulated	11	7.94782	0.0004
macrophage activation	GO	6 out of 7	35.5815	downregulated	1	0.711751	0.4908	upregulated	4	10.9457	1.8e-05	downregulated	6	8.34635	0.0002	downregulated	9	26.4771	3.2e-12	upregulated	4	4.36704	0.0127	upregulated	2	3.40902	0.0331	upregulated	2	3.21584	0.0401
regulation of gene expression, epigenetic	GO	6 out of 7	35.5414	downregulated	6	2.61191	0.0734	upregulated	14	8.59635	0.0002	downregulated	27	4.52286	0.0109	downregulated	13	2.65284	0.0705	upregulated	47	17.7192	2e-08	upregulated	15	2.00041	0.1353	upregulated	33	14.6306	4.4e-07
response to topologically incorrect protein	GO	5 out of 7	35.4295	downregulated	4	3.66935	0.0255	upregulated	8	1.02894	0.3574	upregulated	7	1.90601	0.1487	downregulated	4	0.212141	0.8089	upregulated	28	11.5349	9.8e-06	upregulated	22	13.5258	1.3e-06	upregulated	23	9.42236	8.1e-05
specific granule membrane	GO	5 out of 7	35.3926	downregulated	2	0.527553	0.59	upregulated	4	1.37002	0.2541	downregulated	15	17.0794	3.8e-08	downregulated	14	17.5727	2.3e-08	downregulated	10	5.96492	0.0026	upregulated	6	2.44295	0.0869	upregulated	12	5.1049	0.0061
negative regulation of G1/S transition of mitotic cell cycle	GO	6 out of 7	35.2389	downregulated	2	0.302801	0.7387	upregulated	4	2.44609	0.0866	downregulated	16	10.8128	2e-05	downregulated	10	5.82968	0.0029	upregulated	20	12.8677	2.6e-06	upregulated	5	2.12339	0.1196	upregulated	14	5.74865	0.0032
regulation of myeloid cell differentiation	GO	5 out of 7	34.958	upregulated	5	1.32814	0.265	upregulated	5	3.36151	0.0347	downregulated	19	2.97995	0.0508	downregulated	17	11.1939	1.4e-05	upregulated	28	8.22815	0.0003	upregulated	13	5.64677	0.0035	upregulated	27	11.5989	9.2e-06
establishment of mitotic spindle localization	GO	6 out of 7	34.6036	downregulated	1	1.85016	0.1572	upregulated	1	0.749244	0.4727	downregulated	6	6.96185	0.0009	downregulated	3	3.54785	0.0288	upregulated	3	2.53626	0.0792	upregulated	5	7.09843	0.0008	upregulated	9	13.3583	1.6e-06
cargo receptor activity	GO	7 out of 7	34.5435	downregulated	4	3.67169	0.0254	downregulated	3	2.6106	0.0735	downregulated	9	6.03743	0.0024	downregulated	4	3.32758	0.0359	upregulated	5	0.689836	0.5017	upregulated	8	7.30757	0.0007	upregulated	13	10.8988	1.8e-05
negative regulation of cell cycle G1/S phase transition	GO	6 out of 7	34.2029	downregulated	2	0.290247	0.7481	upregulated	4	2.39409	0.0913	downregulated	16	10.5251	2.7e-05	downregulated	10	5.69675	0.0034	upregulated	20	12.4854	3.8e-06	upregulated	5	2.0477	0.129	upregulated	14	5.55172	0.0039
establishment of spindle orientation	GO	5 out of 7	33.7983	upregulated	1	2.5402	0.0789	upregulated	1	0.694333	0.4994	downregulated	6	6.54457	0.0014	downregulated	4	5.12262	0.006	upregulated	4	2.35697	0.0947	upregulated	5	6.88993	0.001	upregulated	9	13.5785	1.3e-06
cytoplasmic ribonucleoprotein granule	GO	6 out of 7	33.7672	upregulated	8	1.15344	0.3155	downregulated	3	2.26415	0.1039	downregulated	18	2.29973	0.1003	downregulated	12	3.09588	0.0452	upregulated	37	16.3354	8e-08	upregulated	14	2.11066	0.1212	upregulated	27	8.81475	0.0001
female pregnancy	GO	7 out of 7	33.1487	downregulated	8	4.34874	0.0129	downregulated	3	0.92877	0.395	downregulated	12	5.67511	0.0034	downregulated	8	4.68345	0.0092	upregulated	17	6.40863	0.0016	upregulated	11	3.12892	0.0438	upregulated	14	7.97509	0.0003
microtubule organizing center localization	GO	6 out of 7	33.0808	downregulated	1	1.7564	0.1727	upregulated	2	1.84986	0.1573	downregulated	8	10.24	3.6e-05	downregulated	3	3.44291	0.032	upregulated	5	4.91326	0.0073	upregulated	3	4.47744	0.0114	upregulated	8	10.1006	4.1e-05
peptide binding	GO	3 out of 7	31.902	upregulated	10	5.09996	0.0061	upregulated	9	1.7587	0.1723	downregulated	25	18.3452	1.1e-08	downregulated	23	24.2455	3e-11	downregulated	25	4.32672	0.0132	downregulated	32	2.96033	0.0518	upregulated	17	3.45704	0.0315
regulation of mitochondrial depolarization	GO	6 out of 7	31.6836	downregulated	2	2.60906	0.0736	upregulated	1	1.90524	0.1488	downregulated	4	6.2831	0.0019	downregulated	1	2.12549	0.1194	upregulated	5	7.67562	0.0005	upregulated	4	6.38555	0.0017	upregulated	5	8.51003	0.0002
positive regulation of vascular associated smooth muscle cell migration	GO	6 out of 7	31.5565	downregulated	1	4.8997	0.0074					downregulated	1	4.14596	0.0158	downregulated	2	6.64664	0.0013	upregulated	4	5.36009	0.0047	upregulated	3	5.56014	0.0038	upregulated	3	4.94394	0.0071
regulation of chemotaxis	GO	5 out of 7	31.4832	upregulated	4	1.87214	0.1538	upregulated	6	4.34453	0.013	downregulated	21	11.8089	7.4e-06	downregulated	13	7.78224	0.0004	upregulated	14	6.10528	0.0022	upregulated	9	5.40734	0.0045	upregulated	19	6.59606	0.0014
ribonucleoprotein granule	GO	6 out of 7	31.4703	upregulated	9	1.10205	0.3322	downregulated	3	2.20475	0.1103	downregulated	19	2.21589	0.1091	downregulated	12	2.68559	0.0682	upregulated	38	15.1968	2.5e-07	upregulated	14	1.82742	0.1608	upregulated	28	8.44188	0.0002
regulation of adherens junction organization	GO	7 out of 7	31.4274	downregulated	2	2.89262	0.0554	downregulated	1	1.24374	0.2883	downregulated	9	5.79485	0.003	downregulated	6	3.52376	0.0295	upregulated	10	2.42855	0.0882	upregulated	6	6.71092	0.0012	upregulated	10	8.83298	0.0001
protein heterodimerization activity	GO	5 out of 7	31.2711	downregulated	12	2.23452	0.107	upregulated	25	11.3206	1.2e-05	downregulated	41	6.57051	0.0014	downregulated	32	8.9987	0.0001	upregulated	51	6.81344	0.0011	downregulated	44	6.82135	0.0011	upregulated	60	17.9745	1.6e-08
negative regulation of pri-miRNA transcription by RNA polymerase II	GO	7 out of 7	31.2014	downregulated	1	1.3399	0.2619	downregulated	1	2.78604	0.0617	downregulated	2	1.50301	0.2225	downregulated	1	1.10053	0.3327	upregulated	6	13.284	1.7e-06	upregulated	2	1.17551	0.3087	upregulated	6	10.0124	4.5e-05
regulation of intrinsic apoptotic signaling pathway	GO	5 out of 7	30.8245	upregulated	10	1.09282	0.3353	upregulated	5	3.0187	0.0489	downregulated	12	5.94629	0.0026	downregulated	9	5.11221	0.006	upregulated	20	8.33864	0.0002	upregulated	14	5.73666	0.0032	upregulated	16	9.80226	5.5e-05
negative regulation of protein serine/threonine kinase activity	GO	6 out of 7	30.7094	upregulated	6	1.45633	0.2331	downregulated	3	1.50158	0.2228	downregulated	11	4.14214	0.0159	downregulated	6	6.23137	0.002	upregulated	20	7.79042	0.0004	upregulated	7	3.65176	0.0259	upregulated	19	8.84843	0.0001
membrane microdomain	GO	4 out of 7	30.5728	upregulated	7	2.6531	0.0704	upregulated	8	6.66245	0.0013	downregulated	30	14.075	7.7e-07	downregulated	29	19.2831	4.2e-09	upregulated	27	4.01084	0.0181	downregulated	40	5.31526	0.0049	upregulated	24	7.83465	0.0004
membrane raft	GO	4 out of 7	30.5728	upregulated	7	2.6531	0.0704	upregulated	8	6.66245	0.0013	downregulated	30	14.075	7.7e-07	downregulated	29	19.2831	4.2e-09	upregulated	27	4.01084	0.0181	downregulated	40	5.31526	0.0049	upregulated	24	7.83465	0.0004
cellular response to vascular endothelial growth factor stimulus	GO	7 out of 7	30.4488	downregulated	4	6.18911	0.0021	downregulated	2	1.44401	0.236	downregulated	4	2.59518	0.0746	downregulated	1	0.945159	0.3886	upregulated	8	8.90755	0.0001	upregulated	6	4.9183	0.0073	upregulated	8	5.44945	0.0043
regulation of mitotic cell cycle phase transition	GO	5 out of 7	30.3832	upregulated	21	1.72224	0.1787	upregulated	20	5.95205	0.0026	downregulated	40	13.4416	1.5e-06	downregulated	25	6.95965	0.0009	upregulated	47	11.8677	7e-06	upregulated	19	2.78914	0.0615	upregulated	32	2.99944	0.0498
nucleobase-containing compound transport	GO	6 out of 7	30.2901	downregulated	5	0.785079	0.4561	upregulated	10	2.73408	0.065	downregulated	23	7.31959	0.0007	downregulated	18	9.13209	0.0001	upregulated	30	8.79892	0.0002	upregulated	11	1.86618	0.1547	upregulated	22	5.12235	0.006
response to dsRNA	GO	6 out of 7	30.2364	downregulated	2	0.980748	0.375	upregulated	6	4.28668	0.0138	downregulated	11	4.18424	0.0152	downregulated	10	10.0124	4.5e-05	upregulated	13	6.959	0.001	upregulated	7	3.65765	0.0258	upregulated	14	8.72908	0.0002
RNA polymerase II proximal promoter sequence-specific DNA binding	GO	4 out of 7	30.1891	downregulated	18	2.38096	0.0925	downregulated	5	0.463851	0.6289	downregulated	37	1.20696	0.2991	upregulated	4	1.12337	0.3252	upregulated	77	21.7122	3.7e-10	downregulated	32	3.18101	0.0415	upregulated	58	7.92946	0.0004
positive regulation of protein serine/threonine kinase activity	GO	5 out of 7	29.9098	downregulated	5	2.88677	0.0558	upregulated	8	1.26202	0.2831	downregulated	20	7.78524	0.0004	downregulated	20	6.34994	0.0017	upregulated	34	9.53792	7.2e-05	downregulated	40	6.94915	0.001	upregulated	37	10.2991	3.4e-05
regulation of cell division	GO	6 out of 7	29.843	downregulated	2	1.86149	0.1554	downregulated	3	5.95711	0.0026	downregulated	17	6.10254	0.0022	downregulated	7	3.23803	0.0392	downregulated	10	5.27162	0.0051	upregulated	14	7.65494	0.0005	upregulated	19	10.3006	3.4e-05
peripheral nervous system development	GO	5 out of 7	29.807	upregulated	1	0.593466	0.5524	upregulated	3	3.55212	0.0287	downregulated	13	14.521	4.9e-07	downregulated	3	1.15827	0.314	upregulated	9	3.27826	0.0377	upregulated	12	8.14583	0.0003	upregulated	13	6.84928	0.0011
response to metal ion	GO	4 out of 7	29.7973	upregulated	18	2.8604	0.0572	upregulated	14	5.7227	0.0033	downregulated	20	8.89086	0.0001	downregulated	19	6.06224	0.0023	downregulated	35	13.8364	9.8e-07	upregulated	34	16.9811	4.2e-08	upregulated	38	20.2826	1.6e-09
transcription factor activity, RNA polymerase II proximal promoter sequence-specific DNA binding	GO	5 out of 7	29.5743	upregulated	16	2.35765	0.0946	downregulated	7	0.887748	0.4116	downregulated	32	1.51457	0.2199	downregulated	21	2.23593	0.1069	upregulated	68	24.8126	1.7e-11	downregulated	32	4.09931	0.0166	upregulated	48	6.58044	0.0014
positive regulation of supramolecular fiber organization	GO	5 out of 7	29.5531	upregulated	6	1.69848	0.183	upregulated	6	2.40238	0.0905	downregulated	20	7.45792	0.0006	downregulated	9	5.21244	0.0054	upregulated	21	6.09314	0.0023	upregulated	14	5.37732	0.0046	upregulated	24	9.5131	7.4e-05
establishment of spindle localization	GO	5 out of 7	29.4419	upregulated	1	2.23663	0.1068	upregulated	1	0.48789	0.6139	downregulated	7	6.03378	0.0024	downregulated	4	4.03664	0.0177	upregulated	5	2.61691	0.073	upregulated	5	5.89407	0.0028	upregulated	9	11.3484	1.2e-05
regulation of cell junction assembly	GO	6 out of 7	29.3356	downregulated	2	2.4352	0.0876	upregulated	4	1.57022	0.208	downregulated	13	8.44395	0.0002	downregulated	8	4.14315	0.0159	upregulated	11	1.85279	0.1568	upregulated	7	5.14734	0.0058	upregulated	13	8.88343	0.0001
development of primary male sexual characteristics	GO	6 out of 7	29.3047	downregulated	3	1.50323	0.2224	upregulated	6	6.69028	0.0012	downregulated	10	5.58557	0.0038	downregulated	9	3.11533	0.0444	upregulated	16	7.28995	0.0007	upregulated	10	3.91022	0.02	upregulated	16	14.5906	4.6e-07
vascular endothelial growth factor signaling pathway	GO	7 out of 7	29.0581	downregulated	3	7.75091	0.0004	downregulated	2	2.28817	0.1015	downregulated	1	2.81314	0.06	downregulated	1	1.38864	0.2494	upregulated	4	5.85839	0.0029	upregulated	3	3.9013	0.0202	upregulated	2	5.05757	0.0064
blood microparticle	GO	5 out of 7	28.8637	downregulated	3	0.853382	0.426	upregulated	2	0.0902197	0.9137	downregulated	9	7.2562	0.0007	downregulated	5	7.23862	0.0007	upregulated	5	7.28842	0.0007	upregulated	8	8.94416	0.0001	upregulated	6	4.66154	0.0095
regulation of hematopoietic progenitor cell differentiation	GO	7 out of 7	28.856	downregulated	3	2.08203	0.1247	downregulated	1	4.42058	0.012	downregulated	5	3.32028	0.0361	downregulated	1	0.233857	0.7915	upregulated	7	7.5972	0.0005	upregulated	7	4.68785	0.0092	upregulated	10	6.51422	0.0015
regulation of chromatin organization	GO	7 out of 7	28.8123	downregulated	4	2.04724	0.1291	downregulated	3	3.15678	0.0426	downregulated	15	2.05426	0.1282	downregulated	10	2.12172	0.1198	upregulated	38	14.4909	5.1e-07	upregulated	10	2.20696	0.11	upregulated	16	2.73441	0.0649
autolysosome	GO	5 out of 7	28.4777									downregulated	2	4.58919	0.0102	downregulated	3	6.78428	0.0011	upregulated	1	3.35295	0.035	upregulated	3	6.78496	0.0011	upregulated	4	6.96627	0.0009
ficolin-1-rich granule membrane	GO	6 out of 7	28.3023	downregulated	1	0.451306	0.6368	upregulated	5	3.47996	0.0308	downregulated	5	6.32526	0.0018	downregulated	7	14.4428	5.3e-07	upregulated	5	2.98724	0.0504	upregulated	3	4.38796	0.0124	upregulated	5	3.18771	0.0413
establishment of RNA localization	GO	5 out of 7	28.2681	downregulated	3	0.370595	0.6903	upregulated	9	2.25228	0.1052	downregulated	20	7.38178	0.0006	downregulated	16	10.0458	4.3e-05	upregulated	27	8.97435	0.0001	downregulated	16	1.1244	0.3248	upregulated	20	4.8722	0.0077
regulation of JNK cascade	GO	6 out of 7	28.2084	downregulated	7	5.77069	0.0031	upregulated	6	2.48945	0.083	downregulated	16	7.73433	0.0004	downregulated	11	5.68186	0.0034	upregulated	20	4.20877	0.0149	upregulated	13	2.15312	0.1161	upregulated	18	5.14911	0.0058
regulation of cell cycle phase transition	GO	5 out of 7	28.1602	upregulated	21	1.25163	0.286	upregulated	23	6.49121	0.0015	downregulated	40	11.4674	1e-05	downregulated	27	7.31568	0.0007	upregulated	51	11.7431	7.9e-06	upregulated	24	2.67488	0.0689	upregulated	32	2.70189	0.0671
endosome membrane	GO	3 out of 7	28.1342	upregulated	21	3.85013	0.0213	upregulated	22	4.64633	0.0096	downregulated	51	22.6876	1.4e-10	downregulated	44	24.4488	2.4e-11	upregulated	43	4.10504	0.0165	downregulated	76	9.40116	8.3e-05	downregulated	58	5.20965	0.0055
B cell activation	GO	6 out of 7	28.0391	upregulated	4	1.75978	0.1721	downregulated	1	0.113539	0.8927	downregulated	16	9.88743	5.1e-05	downregulated	13	8.51459	0.0002	upregulated	24	7.74503	0.0004	upregulated	3	0.290427	0.7479	upregulated	13	3.24782	0.0389
posttranscriptional gene silencing	GO	6 out of 7	27.9804	downregulated	1	0.2464	0.7816	upregulated	2	1.3047	0.2713	downregulated	11	4.94745	0.0071	downregulated	7	5.08059	0.0062	upregulated	15	11.0707	1.6e-05	upregulated	4	0.543337	0.5808	upregulated	11	7.39663	0.0006
negative regulation of apoptotic signaling pathway	GO	5 out of 7	27.8917	upregulated	12	0.977224	0.3764	upregulated	11	7.74175	0.0004	downregulated	12	4.07319	0.017	downregulated	14	8.4324	0.0002	upregulated	22	9.5678	7e-05	upregulated	17	7.27071	0.0007	upregulated	18	7.26653	0.0007
dendritic spine maintenance	GO	5 out of 7	27.844									downregulated	2	4.19654	0.015	downregulated	2	2.5958	0.0746	upregulated	2	4.76455	0.0085	upregulated	3	5.09549	0.0061	upregulated	4	11.1916	1.4e-05
mitotic spindle pole	GO	6 out of 7	27.8025	downregulated	2	3.75641	0.0234	upregulated	2	1.49323	0.2246	downregulated	4	1.75824	0.1723	downregulated	4	3.61743	0.0269	upregulated	6	4.77275	0.0085	upregulated	2	3.01675	0.049	upregulated	10	12.3742	4.2e-06
megakaryocyte development	GO	5 out of 7	27.6599									downregulated	4	7.07167	0.0008	downregulated	3	7.22622	0.0007	upregulated	2	3.50784	0.03	upregulated	3	4.91025	0.0074	upregulated	2	4.94394	0.0071
antibacterial humoral response	GO	5 out of 7	27.6348					upregulated	1	3.25438	0.0386	downregulated	4	5.45715	0.0043	downregulated	5	9.82914	5.4e-05	upregulated	2	1.7312	0.1771	upregulated	3	6.77177	0.0011	upregulated	4	7.09997	0.0008
male sex differentiation	GO	6 out of 7	27.5062	downregulated	4	1.35368	0.2583	upregulated	7	6.23306	0.002	downregulated	10	5.11013	0.006	downregulated	9	2.39371	0.0913	upregulated	19	8.8792	0.0001	upregulated	11	4.13745	0.016	upregulated	16	11.8651	7e-06
erythrocyte development	GO	6 out of 7	27.5026	downregulated	1	2.90682	0.0546					downregulated	3	2.80585	0.0605	downregulated	2	3.13002	0.0437	upregulated	5	7.68571	0.0005	upregulated	4	3.90533	0.0201	upregulated	3	7.06887	0.0009
viral life cycle	GO	5 out of 7	27.2302	upregulated	7	1.50499	0.222	upregulated	9	2.94383	0.0527	downregulated	13	5.09572	0.0061	downregulated	11	5.91476	0.0027	upregulated	17	10.7702	2.1e-05	upregulated	8	4.33196	0.0131	upregulated	17	5.5663	0.0038
regulation of cysteine-type endopeptidase activity	GO	6 out of 7	26.8217	downregulated	8	2.25809	0.1045	upregulated	5	3.62011	0.0268	downregulated	22	8.98134	0.0001	downregulated	15	6.2255	0.002	upregulated	28	3.19837	0.0408	upregulated	16	3.01996	0.0488	upregulated	23	6.7585	0.0012
negative regulation of intrinsic apoptotic signaling pathway	GO	5 out of 7	26.7461	upregulated	7	1.72769	0.1777	upregulated	3	2.26859	0.1035	downregulated	3	2.01004	0.134	downregulated	6	5.55255	0.0039	upregulated	10	7.59161	0.0005	upregulated	7	6.70094	0.0012	upregulated	8	8.8872	0.0001
nuclear matrix	GO	4 out of 7	26.6619	upregulated	9	1.91591	0.1472	upregulated	5	0.704047	0.4946	downregulated	11	1.60731	0.2004	downregulated	9	6.61785	0.0013	upregulated	24	13.7565	1.1e-06	downregulated	12	0.529569	0.5889	upregulated	16	7.82977	0.0004
positive regulation of lipid localization	GO	5 out of 7	26.6333	upregulated	3	2.32464	0.0978	upregulated	5	1.8691	0.1543	downregulated	6	5.43191	0.0044	downregulated	6	6.32753	0.0018	upregulated	7	6.1312	0.0022	upregulated	5	2.77164	0.0626	upregulated	10	10.1648	3.9e-05
kinase regulator activity	GO	4 out of 7	26.5777	upregulated	10	0.955035	0.3848	upregulated	7	2.38253	0.0923	downregulated	14	4.93743	0.0072	downregulated	8	4.8296	0.008	upregulated	26	4.33047	0.0132	upregulated	12	7.92467	0.0004	upregulated	28	12.8305	2.7e-06
RNA transport	GO	6 out of 7	26.5742	downregulated	3	0.394156	0.6742	upregulated	9	2.35557	0.0948	downregulated	19	5.52713	0.004	downregulated	15	8.15931	0.0003	upregulated	26	8.67393	0.0002	upregulated	9	1.15937	0.3137	upregulated	20	5.01587	0.0066
reproductive structure development	GO	6 out of 7	26.4462	downregulated	13	5.33891	0.0048	upregulated	12	3.56017	0.0284	downregulated	26	4.55242	0.0105	downregulated	26	5.75931	0.0032	upregulated	46	5.08657	0.0062	upregulated	23	2.42129	0.0888	upregulated	41	6.84785	0.0011
mitotic DNA damage checkpoint	GO	5 out of 7	26.4453	upregulated	5	0.356425	0.7002	upregulated	6	2.63809	0.0715	downregulated	14	10.0344	4.4e-05	downregulated	10	5.66885	0.0035	upregulated	19	9.53621	7.2e-05	upregulated	5	2.25049	0.1053	upregulated	10	1.94979	0.1423
oxidoreductase activity, acting on paired donors, with incorporation or reduction of molecular oxygen	GO	6 out of 7	26.2093	downregulated	4	1.48768	0.2259	downregulated	3	3.28989	0.0373	downregulated	9	1.41049	0.244	downregulated	8	2.72274	0.0657	upregulated	19	10.9822	1.7e-05	downregulated	13	4.93611	0.0072	upregulated	14	6.3163	0.0018
apoptotic signaling pathway	GO	6 out of 7	26.1891	downregulated	9	2.98238	0.0507	upregulated	7	6.80679	0.0011	downregulated	20	4.68601	0.0092	downregulated	14	3.56253	0.0284	upregulated	29	6.02161	0.0024	upregulated	21	4.51962	0.0109	upregulated	36	11.2237	1.3e-05
sterol metabolic process	GO	4 out of 7	26.1766	upregulated	3	0.395539	0.6733	upregulated	7	3.60152	0.0273	downregulated	10	7.88972	0.0004	downregulated	13	14.0625	7.8e-07	downregulated	10	2.85872	0.0573	upregulated	11	5.85412	0.0029	upregulated	14	5.22607	0.0054
regulation of cell cycle G1/S phase transition	GO	6 out of 7	26.1651	downregulated	3	0.245004	0.7827	upregulated	6	2.0868	0.1241	downregulated	16	4.82065	0.0081	downregulated	12	4.27031	0.014	upregulated	28	13.2052	1.8e-06	upregulated	9	1.68049	0.1863	upregulated	17	4.03028	0.0178
embryo implantation	GO	7 out of 7	26.1186	downregulated	3	8.56552	0.0002	downregulated	2	2.93624	0.0531	downregulated	2	2.68704	0.0681	downregulated	1	1.8957	0.1502	upregulated	5	3.69669	0.0248	upregulated	4	2.90201	0.0549	upregulated	5	3.43541	0.0322
regulation of G1/S transition of mitotic cell cycle	GO	6 out of 7	26.0768	downregulated	3	0.292559	0.7464	upregulated	6	2.27735	0.1026	downregulated	16	5.46687	0.0042	downregulated	11	4.13568	0.016	upregulated	26	12.031	6e-06	upregulated	8	1.89311	0.1506	upregulated	17	4.53497	0.0107
Fc receptor signaling pathway	GO	6 out of 7	26.0571	downregulated	7	2.87816	0.0562	downregulated	1	2.52194	0.0803	downregulated	18	8.22319	0.0003	downregulated	17	10.6847	2.3e-05	upregulated	15	1.54155	0.214	downregulated	20	3.69576	0.0248	upregulated	17	3.90331	0.0202
spindle localization	GO	5 out of 7	26.0113	upregulated	1	2.07947	0.125	upregulated	1	0.392548	0.6753	downregulated	7	5.21325	0.0054	downregulated	4	3.49787	0.0303	upregulated	5	2.15428	0.116	upregulated	6	5.28628	0.0051	upregulated	9	10.2522	3.5e-05
reproductive system development	GO	6 out of 7	25.9968	downregulated	13	5.31019	0.0049	upregulated	12	3.54102	0.029	downregulated	26	4.47979	0.0113	downregulated	26	5.66994	0.0034	upregulated	47	4.97728	0.0069	upregulated	23	2.39708	0.091	upregulated	41	6.70357	0.0012
oxidoreductase activity, acting on paired donors, with incorporation or reduction of molecular oxygen, NAD(P)H as one donor, and incorporation of one atom of oxygen	GO	5 out of 7	25.9821	upregulated	1	0.514255	0.5979	downregulated	2	6.23956	0.002	downregulated	5	5.08079	0.0062	downregulated	3	4.64852	0.0096	upregulated	4	9.66507	6.3e-05	downregulated	4	1.09523	0.3345	upregulated	3	1.95762	0.1412
extracellular matrix organization	GO	6 out of 7	25.8841	downregulated	10	1.80122	0.1651	upregulated	7	0.997439	0.3688	downregulated	25	6.751	0.0012	downregulated	16	8.42586	0.0002	upregulated	13	3.18669	0.0413	upregulated	18	3.12047	0.0441	upregulated	22	3.59626	0.0274
negative regulation of ATP biosynthetic process	GO	6 out of 7	25.84	downregulated	1	1.2918	0.2748	downregulated	1	5.68899	0.0034	downregulated	1	0.771439	0.4623					upregulated	4	6.15626	0.0021	upregulated	3	5.93756	0.0026	upregulated	4	5.99392	0.0025
mRNA transport	GO	5 out of 7	25.8053	downregulated	3	0.600833	0.5484	upregulated	7	1.83346	0.1599	downregulated	17	6.14146	0.0022	downregulated	14	8.99645	0.0001	upregulated	23	8.75327	0.0002	downregulated	11	0.805753	0.4468	upregulated	17	3.95253	0.0192
segment specification	GO	5 out of 7	25.7756	upregulated	1	0.998685	0.3684	upregulated	1	2.35145	0.0952	downregulated	2	2.47591	0.0841	downregulated	2	4.4312	0.0119	upregulated	4	6.35741	0.0017	upregulated	3	7.86321	0.0004	upregulated	3	7.99801	0.0003
regulation of I-kappaB kinase/NF-kappaB signaling	GO	6 out of 7	25.5771	downregulated	5	0.415649	0.6599	upregulated	11	6.47006	0.0015	downregulated	17	4.89998	0.0074	downregulated	13	3.03489	0.0481	upregulated	33	8.078	0.0003	upregulated	22	6.00911	0.0025	upregulated	26	9.60955	6.7e-05
regulation of apoptotic signaling pathway	GO	6 out of 7	25.3856	downregulated	7	0.545847	0.5794	upregulated	17	7.83651	0.0004	downregulated	27	4.00227	0.0183	downregulated	23	6.38055	0.0017	upregulated	43	7.80796	0.0004	upregulated	30	6.89991	0.001	upregulated	39	7.58556	0.0005
regulation of endoplasmic reticulum stress-induced intrinsic apoptotic signaling pathway	GO	5 out of 7	25.3839	upregulated	1	0.542784	0.5811	downregulated	2	2.2942	0.1008	downregulated	1	2.76842	0.0628					upregulated	6	6.72447	0.0012	upregulated	5	6.68324	0.0013	upregulated	5	7.45639	0.0006
promoter-specific chromatin binding	GO	6 out of 7	25.3021	downregulated	1	1.2069	0.2991					downregulated	6	3.51345	0.0298	downregulated	3	2.97432	0.0511	upregulated	13	10.126	4e-05	upregulated	5	2.57178	0.0764	upregulated	9	4.9097	0.0074
regulation of epithelial cell apoptotic process	GO	6 out of 7	25.2144	upregulated	2	1.89152	0.1508	downregulated	1	0.861353	0.4226	downregulated	7	2.15339	0.1161	downregulated	6	3.62465	0.0267	upregulated	8	5.14705	0.0058	upregulated	7	5.95063	0.0026	upregulated	11	9.36883	8.5e-05
extrinsic apoptotic signaling pathway in absence of ligand	GO	6 out of 7	25.2136	downregulated	2	1.61251	0.1994					downregulated	2	5.79806	0.003	downregulated	1	0.319393	0.7266	upregulated	5	3.88598	0.0205	upregulated	4	5.02472	0.0066	upregulated	8	8.57296	0.0002
extrinsic apoptotic signaling pathway	GO	6 out of 7	25.1251	downregulated	2	0.365106	0.6941	upregulated	2	4.49575	0.0112	downregulated	4	6.18815	0.0021	downregulated	4	1.90173	0.1493	upregulated	9	4.43757	0.0118	upregulated	9	5.3989	0.0045	upregulated	19	11.3294	1.2e-05
response to starvation	GO	5 out of 7	25.0182	downregulated	3	4.11197	0.0164	upregulated	5	1.29604	0.2736	downregulated	13	3.43703	0.0322	downregulated	10	4.78126	0.0084	upregulated	25	6.62348	0.0013	upregulated	12	5.6716	0.0034	upregulated	16	7.36049	0.0006
regulation of small GTPase mediated signal transduction	GO	5 out of 7	24.9112	upregulated	23	5.74718	0.0032	downregulated	9	4.33137	0.0131	downregulated	41	9.98093	4.6e-05	downregulated	24	7.73186	0.0004	upregulated	41	8.12313	0.0003	downregulated	50	7.14569	0.0008	upregulated	39	7.63681	0.0005
epidermis development	GO	7 out of 7	24.8439	downregulated	6	0.752719	0.4711	downregulated	5	2.07077	0.1261	downregulated	20	5.09275	0.0061	downregulated	8	1.93388	0.1446	upregulated	22	4.83443	0.008	upregulated	18	2.80383	0.0606	upregulated	25	7.35547	0.0006
establishment of protein localization to organelle	GO	3 out of 7	24.7858	upregulated	21	0.726675	0.4835	upregulated	16	2.02639	0.1318	upregulated	12	2.3292	0.0974	downregulated	17	2.79881	0.0609	downregulated	38	5.57472	0.0038	upregulated	34	9.2159	9.9e-05	upregulated	56	23.4281	6.7e-11
respiratory tube development	GO	6 out of 7	24.7168	downregulated	4	3.00344	0.0496	upregulated	8	3.5519	0.0287	downregulated	16	6.41395	0.0016	downregulated	10	4.78099	0.0084	upregulated	20	6.6061	0.0014	upregulated	11	4.6132	0.0099	upregulated	16	2.85099	0.0578
regulation of signal transduction by p53 class mediator	GO	6 out of 7	24.6996	downregulated	2	3.276	0.0378	upregulated	6	4.56879	0.0104	downregulated	14	5.47716	0.0042	downregulated	8	4.20638	0.0149	upregulated	21	7.56359	0.0005	upregulated	8	1.95631	0.1414	upregulated	15	6.78895	0.0011
microtubule cytoskeleton organization involved in mitosis	GO	5 out of 7	24.5448	upregulated	5	1.48772	0.2259	upregulated	5	2.22579	0.108	downregulated	14	7.72989	0.0004	downregulated	7	3.18435	0.0414	upregulated	12	4.72938	0.0088	upregulated	8	4.90076	0.0074	upregulated	14	7.71389	0.0004
regulation of mitotic spindle assembly	GO	6 out of 7	24.3893	upregulated	3	2.18253	0.1128	downregulated	1	1.677	0.1869	downregulated	2	0.968626	0.3796	downregulated	1	0.629671	0.5328	upregulated	6	10.4914	2.8e-05	upregulated	1	6.40255	0.0017	upregulated	3	6.40255	0.0017
lung development	GO	6 out of 7	24.2484	downregulated	4	3.05018	0.0474	upregulated	8	3.69894	0.0247	downregulated	16	6.67227	0.0013	downregulated	10	4.93011	0.0072	upregulated	18	6.67698	0.0013	upregulated	10	3.64409	0.0261	upregulated	15	2.97375	0.0511
antimicrobial humoral response	GO	6 out of 7	24.2185	downregulated	1	1.01222	0.3634	upregulated	1	2.24599	0.1058	downregulated	9	8.67022	0.0002	downregulated	6	6.8118	0.0011	upregulated	4	0.78011	0.4584	upregulated	3	3.99992	0.0183	upregulated	7	5.19018	0.0056
growth factor binding	GO	6 out of 7	24.196	downregulated	6	2.89058	0.0555	upregulated	6	2.09738	0.1228	downregulated	9	5.67007	0.0034	downregulated	6	3.0573	0.047	upregulated	15	5.08138	0.0062	upregulated	9	1.79757	0.1657	upregulated	17	7.79649	0.0004
negative regulation of leukocyte cell-cell adhesion	GO	6 out of 7	24.1154	downregulated	2	0.23503	0.7905	upregulated	3	0.776751	0.4599	downregulated	10	5.66443	0.0035	downregulated	5	7.48314	0.0006	upregulated	11	3.40401	0.0332	upregulated	8	3.0273	0.0484	upregulated	9	5.07823	0.0062
positive regulation of transcription from RNA polymerase II promoter involved in cellular response to chemical stimulus	GO	6 out of 7	23.9579	downregulated	2	3.66463	0.0256	upregulated	1	0.852094	0.4265	downregulated	4	3.83822	0.0215	downregulated	2	3.04528	0.0476	upregulated	4	4.19764	0.015	upregulated	3	4.04813	0.0175	upregulated	6	6.01608	0.0024
pattern specification process	GO	7 out of 7	23.9317	downregulated	12	3.30132	0.0368	downregulated	6	2.25666	0.1047	downregulated	23	4.68378	0.0092	downregulated	14	1.59861	0.2022	upregulated	39	4.43589	0.0118	upregulated	21	3.71272	0.0244	upregulated	27	3.9427	0.0194
defense response to other organism	GO	6 out of 7	23.9217	downregulated	12	2.30809	0.0995	upregulated	20	10.5651	2.6e-05	downregulated	28	6.71458	0.0012	downregulated	21	12.2416	4.8e-06	upregulated	26	3.74286	0.0237	upregulated	17	2.31505	0.0988	upregulated	30	7.16467	0.0008
regulation of mitochondrial outer membrane permeabilization involved in apoptotic signaling pathway	GO	7 out of 7	23.9081	downregulated	3	2.50738	0.0815	downregulated	1	1.01902	0.3609	downregulated	4	2.37864	0.0927	downregulated	1	0.41849	0.658	upregulated	4	4.54876	0.0106	upregulated	2	5.78387	0.0031	upregulated	5	7.25191	0.0007
membrane invagination	GO	6 out of 7	23.6475	downregulated	5	4.58101	0.0102	downregulated	1	3.31728	0.0363	downregulated	10	5.34294	0.0048	downregulated	9	9.81946	5.4e-05	upregulated	8	1.22786	0.2929	upregulated	4	1.21717	0.2961	downregulated	2	1.85819	0.156
extracellular structure organization	GO	6 out of 7	23.6345	downregulated	10	1.33889	0.2621	upregulated	10	1.65765	0.1906	downregulated	28	5.65973	0.0035	downregulated	18	9.22855	9.8e-05	upregulated	16	2.91675	0.0541	upregulated	18	2.91335	0.0543	upregulated	25	3.23484	0.0394
chromatin DNA binding	GO	4 out of 7	23.5631	upregulated	7	2.18303	0.1127	upregulated	3	0.676893	0.5082	downregulated	12	2.1319	0.1186	upregulated	1	1.89101	0.1509	upregulated	15	5.8217	0.003	upregulated	8	2.76729	0.0628	upregulated	21	17.5931	2.3e-08
kinase activator activity	GO	5 out of 7	23.5163	upregulated	4	0.562308	0.5699	downregulated	1	1.12997	0.323	downregulated	6	5.11219	0.006	downregulated	6	3.05291	0.0472	upregulated	9	2.62922	0.0721	upregulated	6	8.24516	0.0003	upregulated	13	6.53839	0.0014
SH3 domain binding	GO	6 out of 7	23.4348	downregulated	7	5.09353	0.0061	downregulated	2	0.326291	0.7216	downregulated	16	9.53252	7.2e-05	downregulated	8	4.70227	0.0091	upregulated	16	1.70119	0.1825	downregulated	21	4.30434	0.0135	upregulated	17	6.38332	0.0017
regulation of ossification	GO	5 out of 7	23.404	upregulated	7	1.5203	0.2186	upregulated	6	2.00464	0.1347	downregulated	12	3.49245	0.0304	downregulated	7	1.86599	0.1547	upregulated	19	5.56942	0.0038	upregulated	10	5.00124	0.0067	upregulated	17	8.9952	0.0001
peptidyl-tyrosine autophosphorylation	GO	5 out of 7	23.3165	upregulated	1	0.225539	0.7981	upregulated	1	1.10736	0.3304	downregulated	5	6.02632	0.0024	downregulated	6	5.94319	0.0026	upregulated	2	2.51663	0.0807	upregulated	2	1.03308	0.3559	upregulated	7	9.13023	0.0001
regulation of pri-miRNA transcription by RNA polymerase II	GO	6 out of 7	23.108	downregulated	3	2.50873	0.0814	downregulated	1	1.60629	0.2006	downregulated	4	1.4139	0.2432	downregulated	2	1.73907	0.1757	upregulated	9	11.1572	1.4e-05	upregulated	3	0.790763	0.4535	upregulated	6	4.68287	0.0093
spliceosomal complex	GO	1 out of 7	23.0844	upregulated	11	2.255	0.1049	upregulated	15	7.57245	0.0005	upregulated	5	2.24813	0.1056	downregulated	7	1.05876	0.3469	upregulated	37	23.0844	9.4e-11	downregulated	16	1.94455	0.1431	upregulated	31	19.1739	4.7e-09
neutrophil migration	GO	5 out of 7	23.0749	downregulated	3	1.55942	0.2103	upregulated	1	0.743002	0.4757	downregulated	13	10.3991	3e-05	downregulated	7	9.08041	0.0001	downregulated	4	1.43043	0.2392	upregulated	5	1.6337	0.1952	upregulated	6	2.57572	0.0761
lung alveolus development	GO	6 out of 7	22.9228	downregulated	1	1.45462	0.2335	upregulated	1	0.607491	0.5447	downregulated	6	5.70897	0.0033	downregulated	3	2.78365	0.0618	upregulated	6	6.74752	0.0012	upregulated	2	2.61018	0.0735	upregulated	5	4.22537	0.0146
negative regulation of cysteine-type endopeptidase activity	GO	6 out of 7	22.9133	downregulated	3	2.38331	0.0922	upregulated	2	0.266325	0.7662	downregulated	8	2.71809	0.066	downregulated	8	6.91797	0.001	upregulated	12	2.85671	0.0575	upregulated	8	3.96483	0.019	upregulated	8	4.33873	0.0131
protein kinase regulator activity	GO	4 out of 7	22.8296	upregulated	9	0.976568	0.3766	upregulated	6	2.23845	0.1066	upregulated	9	4.33181	0.0131	downregulated	7	3.81868	0.022	upregulated	22	4.11238	0.0164	upregulated	9	7.33492	0.0007	upregulated	24	10.7786	2.1e-05
regulation of striated muscle tissue development	GO	6 out of 7	22.7104	upregulated	11	6.91343	0.001	downregulated	2	0.628457	0.5334	downregulated	12	8.59801	0.0002	downregulated	5	1.67504	0.1873	upregulated	14	5.5037	0.0041	upregulated	12	7.75198	0.0004	upregulated	14	5.46663	0.0042
antimicrobial humoral immune response mediated by antimicrobial peptide	GO	6 out of 7	22.7101	downregulated	1	1.45272	0.2339	upregulated	1	2.75095	0.0639	downregulated	6	4.45586	0.0116	downregulated	4	5.28681	0.0051	upregulated	3	1.19214	0.3036	upregulated	3	5.4399	0.0043	upregulated	6	7.6336	0.0005
Golgi-associated vesicle membrane	GO	3 out of 7	22.6291	upregulated	5	5.21767	0.0054	downregulated	3	1.64218	0.1936	downregulated	13	15.4247	2e-07	downregulated	11	18.6396	8e-09	downregulated	8	1.32798	0.265	downregulated	16	4.42122	0.012	downregulated	16	2.11054	0.1212
regeneration	GO	5 out of 7	22.5411	downregulated	3	0.413523	0.6613	upregulated	4	3.72913	0.024	downregulated	16	6.15768	0.0021	downregulated	10	6.68734	0.0012	upregulated	14	4.62361	0.0098	downregulated	8	3.53359	0.0292	upregulated	16	8.38812	0.0002
RNA polymerase II distal enhancer sequence-specific DNA binding	GO	5 out of 7	22.5374	upregulated	3	3.33643	0.0356	downregulated	1	2.54451	0.0785	upregulated	3	1.05211	0.3492	downregulated	4	1.44068	0.2368	upregulated	18	12.561	3.5e-06	upregulated	10	3.86611	0.0209	upregulated	13	6.51365	0.0015
carbohydrate binding	GO	6 out of 7	22.5337	downregulated	6	1.54606	0.2131	upregulated	10	2.04918	0.1288	downregulated	17	5.92209	0.0027	downregulated	11	4.4052	0.0122	upregulated	21	3.38887	0.0337	upregulated	16	4.72017	0.0089	upregulated	18	4.60053	0.01
antigen processing and presentation of peptide antigen	GO	2 out of 7	22.4677	upregulated	4	5.04156	0.0065	upregulated	9	2.26451	0.1039	downregulated	20	20.3684	1.4e-09	downregulated	18	22.6633	1.4e-10	downregulated	13	1.97146	0.1393	downregulated	30	7.02609	0.0009	downregulated	20	4.26029	0.0141
cellular response to decreased oxygen levels	GO	6 out of 7	22.398	downregulated	9	9.12464	0.0001	upregulated	7	1.42841	0.2397	downregulated	12	1.7947	0.1662	downregulated	5	1.46299	0.2315	upregulated	18	4.69704	0.0091	upregulated	11	2.38691	0.0919	upregulated	20	4.36012	0.0128
oxidoreductase activity, acting on the CH-CH group of donors, NAD or NADP as acceptor	GO	5 out of 7	22.326	downregulated	1	1.783	0.1681	upregulated	1	2.63523	0.0717	downregulated	2	1.06826	0.3436	downregulated	4	8.44728	0.0002	upregulated	5	10.8247	2e-05	downregulated	3	1.65771	0.1906	upregulated	6	4.4957	0.0112
long-chain fatty acid binding	GO	4 out of 7	22.319					downregulated	1	2.82665	0.0592	downregulated	3	12.4692	3.8e-06	downregulated	1	5.24738	0.0053									upregulated	1	1.77579	0.1693
gonad development	GO	6 out of 7	22.3072	downregulated	4	2.93951	0.0529	upregulated	7	5.48885	0.0041	downregulated	11	3.86469	0.021	downregulated	11	2.4813	0.0836	upregulated	24	4.93389	0.0072	upregulated	13	2.80733	0.0604	upregulated	19	10.7693	2.1e-05
structural constituent of muscle	GO	6 out of 7	22.2274					downregulated	1	1.01859	0.3611	downregulated	3	5.16714	0.0057	downregulated	3	3.83603	0.0216	upregulated	3	1.80902	0.1638	upregulated	5	5.69258	0.0034	upregulated	6	4.70404	0.0091
positive regulation of intrinsic apoptotic signaling pathway	GO	6 out of 7	22.1589	downregulated	3	1.88933	0.1512	upregulated	2	2.15031	0.1164	downregulated	7	8.18974	0.0003	downregulated	2	0.626499	0.5345	upregulated	12	4.77237	0.0085	upregulated	5	2.06167	0.1272	upregulated	9	6.76956	0.0011
negative regulation of transcription from RNA polymerase II promoter in response to stress	GO	4 out of 7	22.0001	upregulated	1	2.30464	0.0998	upregulated	2	3.48906	0.0305	upregulated	1	2.3214	0.0981	downregulated	1	1.75591	0.1727	upregulated	3	5.74948	0.0032	upregulated	4	10.7463	2.2e-05	upregulated	5	11.8636	7e-06
negative regulation of vasculature development	GO	6 out of 7	21.8577	downregulated	6	2.48814	0.0831	upregulated	4	3.03624	0.048	downregulated	6	2.59836	0.0744	downregulated	6	2.00466	0.1347	upregulated	16	6.84494	0.0011	upregulated	9	4.79201	0.0083	upregulated	15	6.16584	0.0021
muscle cell cellular homeostasis	GO	5 out of 7	21.7163									downregulated	2	5.28472	0.0051	downregulated	1	3.40074	0.0333	upregulated	1	2.67729	0.0687	upregulated	2	5.15107	0.0058	upregulated	2	5.20244	0.0055
cofactor transport	GO	6 out of 7	21.6918	upregulated	3	1.42741	0.2399	downregulated	1	0.5894	0.5547	downregulated	4	5.17109	0.0057	downregulated	1	1.38445	0.2505	upregulated	8	4.19792	0.015	upregulated	5	6.38799	0.0017	upregulated	5	5.38836	0.0046
regulation of execution phase of apoptosis	GO	5 out of 7	21.5161	upregulated	1	2.09151	0.1235					downregulated	5	4.5007	0.0111	downregulated	4	4.29227	0.0137	upregulated	6	2.85815	0.0574	upregulated	4	4.95058	0.0071	upregulated	8	7.0059	0.0009
leukocyte migration	GO	4 out of 7	21.5123	downregulated	5	0.583517	0.5579	upregulated	13	6.15525	0.0021	downregulated	29	12.3454	4.3e-06	downregulated	19	16.6218	6e-08	upregulated	18	5.18431	0.0056	downregulated	21	3.84155	0.0215	downregulated	17	3.22595	0.0397
antigen processing and presentation of exogenous antigen	GO	2 out of 7	21.49	upregulated	4	5.16823	0.0057	upregulated	8	2.15336	0.1161	downregulated	20	21.016	7.5e-10	downregulated	18	22.8964	1.1e-10	downregulated	11	1.97862	0.1383	downregulated	29	8.28441	0.0003	downregulated	20	4.83771	0.0079
regulation of DNA biosynthetic process	GO	5 out of 7	21.3909	upregulated	8	3.51484	0.0298	upregulated	5	2.81995	0.0596	downregulated	10	6.12263	0.0022	downregulated	7	5.20503	0.0055	upregulated	15	5.58469	0.0038	upregulated	6	3.40219	0.0333	upregulated	11	4.59121	0.0101
positive regulation of epithelial cell apoptotic process	GO	6 out of 7	21.3738	upregulated	1	2.75102	0.0639	downregulated	1	1.6154	0.1988	downregulated	4	3.04357	0.0477	downregulated	3	2.19389	0.1115	upregulated	5	4.22425	0.0146	upregulated	3	6.53395	0.0015	upregulated	5	6.51376	0.0015
regulation of ATP metabolic process	GO	5 out of 7	21.317	upregulated	5	2.43838	0.0873	downregulated	2	4.19264	0.0151	downregulated	4	1.56501	0.2091	downregulated	2	1.3057	0.271	upregulated	9	8.42957	0.0002	upregulated	7	5.12056	0.006	upregulated	8	8.2625	0.0003
receptor complex	GO	2 out of 7	21.1318	upregulated	20	5.30089	0.005	upregulated	7	3.4619	0.0314	downregulated	37	18.6737	7.8e-09	downregulated	26	21.7876	3.4e-10	downregulated	24	4.52335	0.0109	downregulated	43	2.85731	0.0574	downregulated	38	3.18611	0.0413
negative regulation of extrinsic apoptotic signaling pathway in absence of ligand	GO	5 out of 7	21.1281	upregulated	1	1.76889	0.1705	upregulated	2	5.83642	0.0029	downregulated	3	2.61815	0.0729	downregulated	3	2.22184	0.1084	upregulated	6	9.76332	5.8e-05	upregulated	3	5.92097	0.0027	upregulated	6	8.20916	0.0003
regulation of membrane permeability	GO	6 out of 7	21.1067	downregulated	4	2.06615	0.1267	downregulated	1	0.559117	0.5717	downregulated	6	2.7078	0.0667	upregulated	1	1.59532	0.2028	upregulated	9	5.06994	0.0063	upregulated	5	5.17141	0.0057	upregulated	10	7.12761	0.0008
tube formation	GO	6 out of 7	21.0325	downregulated	5	4.49052	0.0112	upregulated	5	2.48037	0.0837	downregulated	12	6.08384	0.0023	downregulated	5	0.564864	0.5684	upregulated	21	4.93325	0.0072	upregulated	10	4.51603	0.0109	upregulated	16	2.9244	0.0537
detoxification	GO	5 out of 7	20.9354	downregulated	2	0.873676	0.4174	upregulated	7	4.54149	0.0107	downregulated	5	5.93511	0.0026	downregulated	4	3.29929	0.0369	downregulated	6	5.97436	0.0025	upregulated	12	10.6558	2.4e-05	upregulated	14	10.6874	2.3e-05
cellular response to topologically incorrect protein	GO	5 out of 7	20.8607	downregulated	3	2.60425	0.074	upregulated	6	0.832202	0.4351	upregulated	6	1.88486	0.1519	downregulated	3	0.367132	0.6927	upregulated	18	6.85949	0.001	upregulated	13	7.60305	0.0005	upregulated	18	6.14382	0.0021
cell adhesion mediator activity	GO	5 out of 7	20.8193	downregulated	3	1.92063	0.1465	upregulated	1	0.615243	0.5405	downregulated	7	7.48731	0.0006	downregulated	3	4.38977	0.0124	downregulated	2	0.776905	0.4598	upregulated	5	5.0549	0.0064	upregulated	4	3.35885	0.0348
regulation of female gonad development	GO	5 out of 7	20.8065									downregulated	1	2.11974	0.1201	downregulated	1	2.02506	0.132	upregulated	2	5.76599	0.0031	upregulated	2	4.32582	0.0132	upregulated	2	6.56984	0.0014
regulation of p38MAPK cascade	GO	7 out of 7	20.7792	downregulated	1	3.18558	0.0414	downregulated	1	0.817769	0.4414	downregulated	4	3.80507	0.0223	downregulated	1	0.7624	0.4665	upregulated	5	3.4428	0.032	upregulated	5	3.12558	0.0439	upregulated	8	5.64002	0.0036
negative regulation of endoplasmic reticulum stress-induced intrinsic apoptotic signaling pathway	GO	4 out of 7	20.7459	upregulated	1	1.01904	0.3609	downregulated	2	3.46905	0.0311									upregulated	1	5.29076	0.005	upregulated	3	6.50259	0.0015	upregulated	2	6.50259	0.0015
cytokine binding	GO	6 out of 7	20.5938	downregulated	4	1.9936	0.1362	upregulated	4	2.15071	0.1164	downregulated	9	4.64156	0.0096	downregulated	4	2.81862	0.0597	upregulated	8	4.62299	0.0098	upregulated	7	3.59943	0.0273	upregulated	12	5.06831	0.0063
phosphatidylinositol bisphosphate binding	GO	6 out of 7	20.5555	downregulated	3	1.10333	0.3318	upregulated	1	2.20788	0.1099	downregulated	9	3.9811	0.0187	downregulated	5	5.73784	0.0032	upregulated	8	3.95781	0.0191	upregulated	8	4.07578	0.017	upregulated	9	3.90751	0.0201
pre-mRNA binding	GO	5 out of 7	20.4915	upregulated	2	1.17907	0.3076	downregulated	1	3.67269	0.0254	downregulated	6	3.69972	0.0247	downregulated	2	2.74772	0.0641	upregulated	10	10.1398	3.9e-05	downregulated	5	2.82933	0.0591	upregulated	4	4.24005	0.0144
protein import	GO	4 out of 7	20.45	upregulated	6	0.44144	0.6431	upregulated	8	2.32477	0.0978	downregulated	6	1.51084	0.2207	downregulated	7	5.16687	0.0057	upregulated	20	6.55187	0.0014	upregulated	14	6.50287	0.0015	upregulated	11	10.0356	4.4e-05
positive regulation of adherens junction organization	GO	5 out of 7	20.3527	downregulated	2	4.61201	0.0099	upregulated	1	0.800398	0.4491	downregulated	4	3.42576	0.0325	upregulated	1	2.00878	0.1342	upregulated	5	4.37743	0.0126	upregulated	3	6.62567	0.0013	upregulated	4	4.12099	0.0162
negative regulation of cyclin-dependent protein kinase activity	GO	5 out of 7	20.2927	upregulated	2	1.46793	0.2304	downregulated	1	2.03281	0.131	downregulated	2	1.97797	0.1383	upregulated	1	2.72501	0.0655	upregulated	9	10.2904	3.4e-05	upregulated	2	0.981236	0.3748	upregulated	6	6.47821	0.0015
glial cell projection	GO	6 out of 7	20.2786					downregulated	1	1.06991	0.343	downregulated	2	3.53428	0.0292	downregulated	3	4.82913	0.008	upregulated	1	1.17083	0.3101	upregulated	3	3.40969	0.0331	upregulated	4	6.26479	0.0019
perinuclear endoplasmic reticulum	GO	6 out of 7	20.2044	downregulated	1	1.42045	0.2416	upregulated	1	0.781329	0.4578	downregulated	3	2.27993	0.1023	downregulated	4	5.82809	0.0029	upregulated	3	3.40859	0.0331	upregulated	1	0.615918	0.5401	upregulated	5	7.4328	0.0006
positive regulation of execution phase of apoptosis	GO	5 out of 7	20.1629									downregulated	3	3.96076	0.019	downregulated	1	1.11812	0.3269	upregulated	3	2.48712	0.0831	upregulated	3	4.29631	0.0136	upregulated	6	8.30057	0.0002
histone methyltransferase complex	GO	3 out of 7	20.1063	upregulated	6	2.0346	0.1307	upregulated	4	1.59428	0.2031	upregulated	1	0.611329	0.5426	upregulated	1	1.12385	0.325	upregulated	25	19.8842	2.3e-09	upregulated	6	1.83194	0.1601	upregulated	12	3.75425	0.0234
regulation of Wnt signaling pathway	GO	6 out of 7	20.0843	downregulated	8	1.01092	0.3639	upregulated	7	0.850841	0.4271	downregulated	26	4.98636	0.0068	downregulated	12	1.52478	0.2177	upregulated	37	4.83246	0.008	upregulated	27	5.42842	0.0044	upregulated	36	3.15224	0.0428
muscle organ development	GO	5 out of 7	20.073	upregulated	14	4.91526	0.0073	upregulated	8	1.74608	0.1745	downregulated	24	4.7271	0.0089	downregulated	11	1.94029	0.1437	upregulated	29	4.81078	0.0081	upregulated	28	7.67982	0.0005	upregulated	33	5.83031	0.0029
positive regulation of neuron migration	GO	5 out of 7	20.0422									downregulated	3	4.36899	0.0127	downregulated	1	1.24249	0.2887	upregulated	3	5.33646	0.0048	upregulated	3	3.60787	0.0271	upregulated	5	5.48641	0.0041
regulation of bone development	GO	7 out of 7	19.9525	downregulated	1	1.0435	0.3522	downregulated	1	1.3412	0.2615	downregulated	1	3.96044	0.0191	downregulated	1	4.43644	0.0118	upregulated	1	0.403296	0.6681	upregulated	1	4.91706	0.0073	upregulated	2	3.8506	0.0213
PcG protein complex	GO	6 out of 7	19.7761	downregulated	1	3.55339	0.0286	upregulated	3	4.31592	0.0134	downregulated	4	1.26538	0.2821	downregulated	1	0.367258	0.6926	upregulated	16	13.338	1.6e-06	upregulated	4	1.67748	0.1868	upregulated	7	3.89051	0.0204
cytoplasmic translation	GO	4 out of 7	19.6826	upregulated	2	0.442248	0.6426	upregulated	1	1.07009	0.343	downregulated	3	0.346145	0.7074	downregulated	2	1.36315	0.2559	downregulated	3	1.75679	0.1726	upregulated	8	6.93166	0.001	upregulated	14	12.554	3.5e-06
mitotic spindle	GO	5 out of 7	19.6818	upregulated	10	4.51682	0.0109	downregulated	2	2.96936	0.0513	downregulated	11	2.8124	0.0601	downregulated	6	1.51375	0.2201	upregulated	17	9.07806	0.0001	downregulated	11	3.89609	0.0203	upregulated	17	11.7211	8.1e-06
response to mechanical stimulus	GO	4 out of 7	19.6694	upregulated	6	1.7546	0.173	upregulated	9	5.33268	0.0048	downregulated	17	6.74913	0.0012	downregulated	14	8.02827	0.0003	upregulated	22	9.01454	0.0001	downregulated	20	5.71423	0.0033	upregulated	20	8.67893	0.0002
exocrine system development	GO	6 out of 7	19.6589	downregulated	3	3.45039	0.0317	downregulated	2	3.56027	0.0284	downregulated	5	4.04673	0.0175	downregulated	3	0.962668	0.3819	upregulated	6	4.53315	0.0107	upregulated	6	3.10572	0.0448	downregulated	1	2.30884	0.0994
protein activation cascade	GO	7 out of 7	19.6161	downregulated	3	1.66018	0.1901	downregulated	1	0.470476	0.6247	downregulated	4	1.38377	0.2506	downregulated	3	5.61763	0.0036	upregulated	1	0.364856	0.6943	upregulated	5	3.06594	0.0466	upregulated	6	7.0532	0.0009
positive regulation of apoptotic signaling pathway	GO	6 out of 7	19.5115	downregulated	6	1.6199	0.1979	upregulated	8	5.99558	0.0025	downregulated	17	5.67735	0.0034	downregulated	12	3.25941	0.0384	upregulated	21	2.21697	0.1089	upregulated	12	4.02728	0.0178	upregulated	24	8.70618	0.0002
endothelial cell differentiation	GO	6 out of 7	19.4369	downregulated	5	4.6546	0.0095	upregulated	5	3.0059	0.0495	downregulated	9	4.06683	0.0171	downregulated	4	1.9275	0.1455	upregulated	8	2.07007	0.1262	upregulated	10	4.73238	0.0088	upregulated	11	4.99146	0.0068
regulation of fatty acid transport	GO	6 out of 7	19.3807					downregulated	1	1.02018	0.3605	downregulated	2	2.70827	0.0667	downregulated	3	5.43877	0.0043	upregulated	4	3.8907	0.0204	upregulated	2	3.24759	0.0389	upregulated	2	3.07517	0.0462
beta-catenin binding	GO	6 out of 7	19.2831	downregulated	4	1.63952	0.1941	upregulated	2	1.57776	0.2064	downregulated	8	4.41783	0.0121	downregulated	3	2.26802	0.1035	upregulated	15	4.76692	0.0085	upregulated	5	3.55988	0.0284	upregulated	8	4.20873	0.0149
nuclear transcription factor complex	GO	5 out of 7	19.1187	downregulated	10	4.66615	0.0094	upregulated	7	1.50106	0.2229	downregulated	17	2.21675	0.109	upregulated	2	2.68584	0.0682	upregulated	25	7.81369	0.0004	upregulated	18	3.46721	0.0312	upregulated	21	5.14176	0.0058
phosphatidylinositol phosphate binding	GO	5 out of 7	19.1171	downregulated	5	3.14284	0.0432	upregulated	1	1.76591	0.171	downregulated	14	5.67899	0.0034	downregulated	10	6.85971	0.001	upregulated	16	5.38709	0.0046	downregulated	24	4.9409	0.0071	upregulated	15	4.75529	0.0086
positive regulation of endothelial cell chemotaxis	GO	5 out of 7	19.0681	downregulated	1	4.07441	0.017	downregulated	1	2.0926	0.1234									upregulated	4	3.18705	0.0413	upregulated	2	4.27777	0.0139	upregulated	1	5.43625	0.0044
regulation of carbohydrate metabolic process by regulation of transcription from RNA polymerase II promoter	GO	3 out of 7	19.0614									downregulated	1	1.48886	0.2256					upregulated	5	9.39656	8.3e-05					upregulated	5	8.17596	0.0003
negative regulation of DNA-dependent DNA replication	GO	5 out of 7	19.0216	upregulated	1	0.707733	0.4928	upregulated	1	0.578658	0.5606	downregulated	3	3.43885	0.0321	downregulated	2	2.49383	0.0826	upregulated	6	5.86617	0.0028	upregulated	3	2.60792	0.0737	upregulated	4	5.90125	0.0027
RNA polymerase II transcription factor binding	GO	5 out of 7	19.0061	downregulated	4	1.98473	0.1374	upregulated	4	1.51768	0.2192	downregulated	11	2.32326	0.098	downregulated	8	2.36652	0.0938	upregulated	22	10.254	3.5e-05	downregulated	14	1.2077	0.2989	upregulated	13	4.80302	0.0082
intrinsic component of endoplasmic reticulum membrane	GO	2 out of 7	18.9744	upregulated	3	5.02192	0.0066	upregulated	7	1.10376	0.3316	downregulated	15	13.3354	1.6e-06	downregulated	15	17.0892	3.8e-08	downregulated	9	0.712537	0.4904	downregulated	20	1.62455	0.197	downregulated	21	2.98745	0.0504
regulation of ERBB signaling pathway	GO	6 out of 7	18.9152	downregulated	4	3.23724	0.0393	downregulated	2	3.05541	0.0471	downregulated	10	7.22735	0.0007	downregulated	6	2.3122	0.099	upregulated	9	1.49511	0.2242	downregulated	8	0.911319	0.402	upregulated	9	2.49923	0.0821
regulation of inflammatory response	GO	4 out of 7	18.8774	upregulated	6	1.25524	0.285	upregulated	13	4.41765	0.0121	downregulated	21	4.64552	0.0096	downregulated	24	13.8033	1e-06	upregulated	23	2.80278	0.0606	downregulated	17	2.86057	0.0572	upregulated	27	6.15927	0.0021
regulation of extracellular matrix organization	GO	6 out of 7	18.8636	downregulated	3	3.09171	0.0454	upregulated	1	0.366894	0.6929	downregulated	6	5.80644	0.003	downregulated	2	0.750321	0.4722	upregulated	2	1.52777	0.217	upregulated	2	2.24764	0.1056	upregulated	7	5.80664	0.003
regulation of extrinsic apoptotic signaling pathway in absence of ligand	GO	5 out of 7	18.7747	upregulated	2	1.38285	0.2509	upregulated	2	4.99041	0.0068	downregulated	3	1.66986	0.1883	downregulated	3	1.33777	0.2624	upregulated	7	8.89281	0.0001	upregulated	6	6.46386	0.0016	upregulated	8	6.7836	0.0011
intrinsic apoptotic signaling pathway by p53 class mediator	GO	6 out of 7	18.7533	downregulated	1	2.47374	0.0843	downregulated	1	0.886383	0.4121	upregulated	1	2.8815	0.0561	downregulated	2	1.06603	0.3444	upregulated	9	3.69379	0.0249	upregulated	5	5.8311	0.0029	upregulated	9	7.68376	0.0005
regulation of complement activation	GO	6 out of 7	18.7467	downregulated	2	1.44843	0.2349					downregulated	4	2.62622	0.0724	downregulated	4	9.96954	4.7e-05	upregulated	1	0.223799	0.7995	upregulated	5	1.54809	0.2127	upregulated	5	2.9306	0.0534
negative regulation of hemopoiesis	GO	6 out of 7	18.7441	downregulated	4	0.794147	0.452	upregulated	4	6.25185	0.0019	downregulated	11	3.44644	0.0319	downregulated	7	3.24601	0.0389	upregulated	11	3.47938	0.0308	upregulated	10	2.82626	0.0592	upregulated	18	11.2037	1.4e-05
positive regulation of proteolysis involved in cellular protein catabolic process	GO	5 out of 7	18.6806	upregulated	8	1.87332	0.1536	upregulated	7	2.80364	0.0606	downregulated	12	4.625	0.0098	downregulated	7	1.60146	0.2016	upregulated	14	7.00481	0.0009	upregulated	8	4.704	0.0091	upregulated	11	5.42224	0.0044
reactive oxygen species metabolic process	GO	4 out of 7	18.5847	upregulated	1	1.02499	0.3588	upregulated	2	1.81285	0.1632	downregulated	11	6.64247	0.0013	downregulated	10	9.95007	4.8e-05	downregulated	8	8.31562	0.0002	upregulated	7	6.54238	0.0014	upregulated	10	6.60327	0.0014
cysteine-type peptidase activity	GO	6 out of 7	18.5839	downregulated	3	0.874644	0.417	upregulated	16	6.31361	0.0018	downregulated	16	4.31779	0.0133	downregulated	13	5.69779	0.0034	upregulated	27	9.61814	6.7e-05	upregulated	15	2.6479	0.0708	upregulated	13	1.74123	0.1753
cell-cell adhesion mediator activity	GO	5 out of 7	18.5669	downregulated	2	1.19807	0.3018	upregulated	1	0.739471	0.4774	downregulated	6	6.18877	0.0021	downregulated	2	3.52306	0.0295	downregulated	2	0.911712	0.4018	upregulated	5	5.47142	0.0042	upregulated	4	3.83674	0.0216
antigen processing and presentation	GO	2 out of 7	18.4463	upregulated	6	4.88943	0.0075	upregulated	10	2.1832	0.1127	downregulated	22	18.9009	6.2e-09	downregulated	19	21.3725	5.2e-10	downregulated	15	2.00342	0.1349	downregulated	32	6.97942	0.0009	downregulated	22	5.77161	0.0031
positive regulation of nitric oxide metabolic process	GO	5 out of 7	18.4106	downregulated	1	2.67212	0.0691	upregulated	1	3.0119	0.0492	downregulated	6	9.08244	0.0001	downregulated	6	9.82914	5.4e-05	downregulated	1	3.11217	0.0445	upregulated	2	1.12534	0.3245	upregulated	3	1.82565	0.1611
positive regulation of DNA biosynthetic process	GO	4 out of 7	18.3814	upregulated	5	3.7321	0.0239	upregulated	4	3.25197	0.0387	downregulated	7	7.09925	0.0008	downregulated	5	5.32335	0.0049	upregulated	9	4.13401	0.016	upregulated	4	3.94737	0.0193	upregulated	7	5.55687	0.0039
cell-substrate adhesion	GO	5 out of 7	18.3294	upregulated	5	1.46936	0.2301	upregulated	4	2.54803	0.0782	downregulated	13	1.93415	0.1445	downregulated	10	7.5313	0.0005	upregulated	18	5.20053	0.0055	upregulated	14	3.91757	0.0199	upregulated	18	3.76325	0.0232
regulation of cytokine biosynthetic process	GO	6 out of 7	18.2884	downregulated	1	0.936486	0.392	upregulated	4	8.1205	0.0003	downregulated	10	4.11067	0.0164	downregulated	9	12.6394	3.2e-06	upregulated	9	1.78283	0.1682	upregulated	1	2.71445	0.0662	upregulated	8	4.22503	0.0146
positive regulation of ubiquitin-dependent protein catabolic process	GO	4 out of 7	18.2843	upregulated	7	2.15602	0.1158	upregulated	5	2.97356	0.0511	downregulated	10	5.23299	0.0053	upregulated	1	1.68774	0.1849	upregulated	12	7.68172	0.0005	upregulated	7	5.41445	0.0045	upregulated	11	6.77244	0.0011
protein binding involved in heterotypic cell-cell adhesion	GO	5 out of 7	18.2737									downregulated	3	7.1672	0.0008	downregulated	1	2.9585	0.0519	upregulated	2	2.29809	0.1005	upregulated	2	3.20933	0.0404	upregulated	2	2.64058	0.0713
small ribosomal subunit	GO	3 out of 7	18.2254	upregulated	3	0.483162	0.6168	downregulated	1	0.596508	0.5507	upregulated	3	2.63538	0.0717	upregulated	1	1.63212	0.1955	downregulated	3	2.69594	0.0675	upregulated	5	3.14751	0.043	upregulated	20	21.928	3e-10
positive regulation of signal transduction by p53 class mediator	GO	6 out of 7	18.1847	downregulated	1	2.75102	0.0639					downregulated	3	3.18749	0.0413	downregulated	1	2.26804	0.1035	upregulated	4	5.05305	0.0064	upregulated	2	1.27693	0.2789	upregulated	3	3.64812	0.026
modification-dependent protein binding	GO	3 out of 7	18.139	upregulated	9	0.956239	0.3843	upregulated	12	4.00592	0.0182	upregulated	7	3.09726	0.0452	downregulated	14	6.33223	0.0018	upregulated	28	16.2012	9.2e-08	upregulated	17	5.62691	0.0036	downregulated	15	1.96191	0.1406
NADPH oxidase complex	GO	2 out of 7	18.1076									downregulated	4	8.70885	0.0002	downregulated	3	9.39875	8.3e-05
cytokinetic process	GO	6 out of 7	18.1019	downregulated	1	1.65786	0.1905					downregulated	3	4.50042	0.0111	downregulated	2	2.74514	0.0642	upregulated	3	1.86676	0.1546	upregulated	1	3.91232	0.02	upregulated	2	3.41942	0.0327
humoral immune response	GO	3 out of 7	18.0957	upregulated	1	1.64192	0.1936	upregulated	1	1.42002	0.2417	downregulated	16	8.23778	0.0003	downregulated	14	12.6524	3.2e-06	upregulated	6	0.267494	0.7653	upregulated	7	4.75898	0.0086	upregulated	18	7.70039	0.0005
positive regulation of reactive oxygen species biosynthetic process	GO	5 out of 7	18.0809	downregulated	1	2.45967	0.0855	upregulated	1	2.82142	0.0595	downregulated	6	8.68797	0.0002	downregulated	6	8.87128	0.0001	downregulated	1	2.92118	0.0539	upregulated	3	1.38	0.2516	upregulated	5	2.4246	0.0885
serine-type peptidase activity	GO	6 out of 7	18.0175	downregulated	10	4.65587	0.0095	downregulated	2	1.91596	0.1472	upregulated	4	3.52628	0.0294	downregulated	9	7.88437	0.0004	upregulated	7	2.67162	0.0691	upregulated	11	1.40128	0.2463	upregulated	9	3.01468	0.0491
sterol transport	GO	4 out of 7	17.9357	upregulated	3	0.808329	0.4456	upregulated	4	1.9914	0.1365	downregulated	8	3.82093	0.0219	downregulated	7	10.4287	3e-05	upregulated	6	2.09046	0.1236	upregulated	4	3.15199	0.0428	upregulated	6	3.33384	0.0357
14-3-3 protein binding	GO	6 out of 7	17.8809	downregulated	4	6.24775	0.0019					downregulated	1	1.00243	0.367	downregulated	2	2.3148	0.0988	upregulated	4	2.96559	0.0515	upregulated	2	2.17236	0.1139	upregulated	3	3.17803	0.0417
apical plasma membrane	GO	5 out of 7	17.8562	downregulated	10	3.03434	0.0481	downregulated	6	0.969583	0.3792	downregulated	24	10.8053	2e-05	downregulated	11	4.39175	0.0124	upregulated	15	1.75474	0.173	downregulated	29	3.5088	0.0299	upregulated	19	2.16403	0.1149
embryonic pattern specification	GO	6 out of 7	17.8562	downregulated	4	2.42434	0.0885	downregulated	1	2.9808	0.0508	downregulated	4	4.00523	0.0182	upregulated	1	0.918966	0.3989	upregulated	7	2.38625	0.092	upregulated	3	2.66175	0.0698	upregulated	4	4.31676	0.0133
regulation of microglial cell activation	GO	3 out of 7	17.8418									downregulated	3	7.84287	0.0004	downregulated	3	10.8969	1.9e-05	upregulated	1	1.24451	0.2881	downregulated	1	1.48668	0.2261	downregulated	1	0.655841	0.519
glial cell fate commitment	GO	3 out of 7	17.7724									downregulated	4	7.6099	0.0005					upregulated	2	3.52612	0.0294	downregulated	3	3.28011	0.0376	upregulated	6	6.63636	0.0013
serine hydrolase activity	GO	6 out of 7	17.7637	downregulated	10	4.54099	0.0107	downregulated	2	1.89693	0.15	upregulated	4	3.47416	0.031	downregulated	10	7.80692	0.0004	upregulated	7	2.65171	0.0705	upregulated	11	1.38164	0.2512	upregulated	9	2.95969	0.0518
positive regulation of cysteine-type endopeptidase activity	GO	5 out of 7	17.6909	downregulated	6	2.33499	0.0968	upregulated	3	4.87947	0.0076	downregulated	14	10.9912	1.7e-05	downregulated	7	1.07821	0.3402	upregulated	17	3.77707	0.0229	downregulated	13	1.81989	0.162	upregulated	14	6.20871	0.002
amine catabolic process	GO	5 out of 7	17.683	downregulated	2	2.68992	0.0679					upregulated	2	3.96294	0.019	downregulated	2	2.90446	0.0548	upregulated	4	3.54422	0.0289	upregulated	2	3.52558	0.0294	upregulated	5	5.01881	0.0066
regulation of development, heterochronic	GO	6 out of 7	17.6338	downregulated	1	1.35223	0.2587	upregulated	1	1.63685	0.1946	downregulated	2	4.19569	0.0151	downregulated	2	2.54566	0.0784	upregulated	2	3.91903	0.0199	upregulated	2	4.28627	0.0138	upregulated	3	2.97171	0.0512
HMG box domain binding	GO	5 out of 7	17.6189	upregulated	1	4.21007	0.0148					downregulated	4	5.91812	0.0027	downregulated	2	3.19957	0.0408	upregulated	4	5.4261	0.0044	upregulated	2	3.69503	0.0248	upregulated	4	3.59011	0.0276
SMAD binding	GO	5 out of 7	17.5314	downregulated	4	4.24347	0.0144	upregulated	2	0.738441	0.4779	upregulated	4	1.2882	0.2758	downregulated	3	0.919415	0.3988	upregulated	17	7.61326	0.0005	upregulated	6	2.89569	0.0553	upregulated	10	3.88617	0.0205
negative regulation of sprouting angiogenesis	GO	6 out of 7	17.4361	downregulated	3	4.22399	0.0146	upregulated	1	0.484344	0.6161	downregulated	2	4.57412	0.0103	downregulated	3	3.40324	0.0333	upregulated	5	2.35763	0.0946	upregulated	2	1.45608	0.2331	upregulated	4	1.90533	0.1488
RNA polymerase II transcription factor complex	GO	4 out of 7	17.4342	downregulated	9	5.16078	0.0057	upregulated	6	1.67922	0.1865	upregulated	6	1.16658	0.3114	upregulated	2	2.87967	0.0562	upregulated	22	8.47754	0.0002	upregulated	16	4.04918	0.0174	upregulated	18	5.47215	0.0042
energy homeostasis	GO	5 out of 7	17.3908	upregulated	3	3.33527	0.0356	downregulated	2	4.84735	0.0078	downregulated	2	1.04884	0.3503					upregulated	5	4.02181	0.0179	upregulated	4	3.1776	0.0417	upregulated	7	7.63047	0.0005
Fc-gamma receptor signaling pathway	GO	5 out of 7	17.3867	downregulated	6	3.80681	0.0222	downregulated	1	2.90431	0.0548	downregulated	10	5.18432	0.0056	downregulated	8	4.78629	0.0083	downregulated	2	0.684421	0.5044	downregulated	13	2.46964	0.0846	upregulated	10	3.85909	0.0211
enhancer sequence-specific DNA binding	GO	5 out of 7	17.2792	upregulated	3	2.97774	0.0509	downregulated	1	2.38937	0.0917	upregulated	3	0.873644	0.4174	downregulated	4	1.0914	0.3357	upregulated	18	9.74878	5.8e-05	upregulated	10	2.96055	0.0518	upregulated	13	4.94051	0.0072
T cell selection	GO	6 out of 7	17.2521	downregulated	2	1.34157	0.2614					downregulated	5	5.18084	0.0056	downregulated	3	8.4958	0.0002	upregulated	1	0.0380337	0.9627	upregulated	2	0.651124	0.5215	upregulated	2	1.54475	0.2134
cellular response to nutrient levels	GO	5 out of 7	17.2219	downregulated	4	3.91909	0.0199	upregulated	6	4.29011	0.0137	downregulated	16	3.82422	0.0218	downregulated	14	7.62109	0.0005	downregulated	21	10.3227	3.3e-05	upregulated	14	6.64136	0.0013	upregulated	20	9.82897	5.4e-05
positive regulation of fatty acid transport	GO	5 out of 7	17.1983									downregulated	1	3.11999	0.0442	downregulated	1	2.4485	0.0864	upregulated	1	4.25059	0.0143	upregulated	1	3.94813	0.0193	upregulated	1	3.43107	0.0324
regulation of hematopoietic stem cell differentiation	GO	6 out of 7	17.1842	downregulated	2	2.34411	0.0959	upregulated	2	2.21545	0.1091	downregulated	4	2.70107	0.0671	downregulated	1	0.363908	0.695	upregulated	4	3.95203	0.0192	upregulated	6	4.9556	0.007	upregulated	7	5.0829	0.0062
histone demethylase activity	GO	5 out of 7	17.1075	downregulated	1	1.50377	0.2223	downregulated	1	1.33892	0.2621	upregulated	1	1.39201	0.2486	upregulated	2	4.69138	0.0092	upregulated	9	9.85633	5.2e-05	upregulated	3	3.68383	0.0251	upregulated	6	6.80799	0.0011
epithelial cell proliferation	GO	5 out of 7	17.1013	upregulated	5	2.37148	0.0933	downregulated	1	0.745154	0.4747	downregulated	9	6.21153	0.002	downregulated	5	4.83988	0.0079	upregulated	6	5.43826	0.0043	downregulated	5	1.08024	0.3395	upregulated	5	3.3182	0.0362
regulation of membrane lipid distribution	GO	5 out of 7	17.0701	downregulated	2	1.50893	0.2211	upregulated	2	1.52656	0.2173	downregulated	4	4.44116	0.0118	downregulated	4	4.97507	0.0069	upregulated	1	3.36952	0.0344	upregulated	2	5.10841	0.006	upregulated	2	2.56307	0.0771
negative regulation of angiogenesis	GO	6 out of 7	16.9963	downregulated	5	2.11086	0.1211	upregulated	4	3.2977	0.037	downregulated	5	3.16102	0.0424	downregulated	5	2.14083	0.1176	upregulated	12	4.55571	0.0105	upregulated	6	2.43772	0.0874	upregulated	13	5.88781	0.0028
midbody	GO	4 out of 7	16.9744	upregulated	12	2.9596	0.0518	downregulated	3	5.96984	0.0026	downregulated	18	3.95039	0.0192	downregulated	8	1.45166	0.2342	downregulated	14	6.4355	0.0016	upregulated	15	8.56206	0.0002	upregulated	19	7.58508	0.0005
purinergic nucleotide receptor signaling pathway	GO	6 out of 7	16.9544	downregulated	1	4.92206	0.0073	upregulated	2	9.58348	6.9e-05	downregulated	2	3.01104	0.0492	downregulated	3	7.7877	0.0004	upregulated	1	3.93473	0.0196	upregulated	1	3.76371	0.0232	upregulated	1	3.11862	0.0442
development of primary sexual characteristics	GO	5 out of 7	16.9116	downregulated	4	2.87808	0.0562	upregulated	7	5.40396	0.0045	downregulated	12	3.71867	0.0243	downregulated	12	2.92128	0.0539	downregulated	14	4.7179	0.0089	upregulated	13	2.64075	0.0713	upregulated	19	10.1568	3.9e-05
G1 DNA damage checkpoint	GO	5 out of 7	16.8556	upregulated	4	0.577552	0.5613	upregulated	4	3.45255	0.0317	downregulated	9	5.96218	0.0026	downregulated	5	2.61123	0.0734	upregulated	13	8.19519	0.0003	upregulated	3	1.66252	0.1897	upregulated	7	2.45457	0.0859
regulation of CD4-positive, alpha-beta T cell activation	GO	6 out of 7	16.7275	downregulated	1	0.374049	0.6879					downregulated	5	2.60829	0.0737	downregulated	2	2.27493	0.1028	upregulated	3	3.43006	0.0324	upregulated	6	3.31807	0.0362	upregulated	5	4.72211	0.0089
regulation of stem cell differentiation	GO	7 out of 7	16.7161	downregulated	5	2.34466	0.0959	downregulated	3	2.04949	0.1288	downregulated	8	1.83174	0.1601	downregulated	2	0.245497	0.7823	upregulated	10	2.96705	0.0515	upregulated	8	2.32477	0.0978	upregulated	13	4.95284	0.0071
cortical actin cytoskeleton	GO	5 out of 7	16.6961	downregulated	4	4.13828	0.016	upregulated	2	0.488425	0.6136	downregulated	14	10.5079	2.7e-05	downregulated	5	1.60949	0.2	downregulated	13	5.76617	0.0031	upregulated	8	2.1916	0.1117	upregulated	11	4.50345	0.0111
epidermis morphogenesis	GO	5 out of 7	16.6632	downregulated	2	1.8526	0.1568	downregulated	1	4.25386	0.0142	downregulated	5	5.51503	0.004	downregulated	1	3.40324	0.0333	upregulated	2	3.73752	0.0238	downregulated	1	2.09903	0.1226	downregulated	1	2.6635	0.0697
skin epidermis development	GO	5 out of 7	16.6602	upregulated	3	1.48298	0.227	downregulated	2	3.27009	0.038	downregulated	10	6.41319	0.0016	downregulated	6	3.47972	0.0308	upregulated	8	4.52745	0.0108	downregulated	7	3.4929	0.0304	upregulated	9	3.94567	0.0193
positive regulation of endothelial cell apoptotic process	GO	6 out of 7	16.5651	upregulated	1	3.2697	0.038	downregulated	1	2.10318	0.1221	downregulated	1	1.62976	0.196	downregulated	1	0.696809	0.4982	upregulated	3	5.19376	0.0056	upregulated	2	4.81523	0.0081	upregulated	3	5.39604	0.0045
mitotic cell cycle arrest	GO	5 out of 7	16.4711	upregulated	1	0.532666	0.587					downregulated	2	3.38069	0.034	downregulated	1	0.767071	0.4644	upregulated	4	6.13539	0.0022	upregulated	2	3.10292	0.0449	upregulated	3	3.61771	0.0268
negative regulation of CD4-positive, alpha-beta T cell activation	GO	4 out of 7	16.4002									downregulated	2	0.646463	0.5239					upregulated	3	4.17113	0.0154	upregulated	4	4.40317	0.0122	upregulated	4	7.17947	0.0008
superoxide metabolic process	GO	5 out of 7	16.2507	downregulated	1	0.786226	0.4556	downregulated	1	1.46283	0.2316	downregulated	6	6.14159	0.0022	downregulated	5	7.2117	0.0007	upregulated	1	0.648313	0.5229	upregulated	2	2.51788	0.0806	upregulated	2	2.14285	0.1173
positive regulation of cell junction assembly	GO	5 out of 7	16.2356	downregulated	2	4.37885	0.0125	upregulated	2	2.56846	0.0767	downregulated	4	2.98326	0.0506	upregulated	1	1.8957	0.1502	upregulated	4	3.67316	0.0254	upregulated	3	6.09746	0.0022	upregulated	4	3.56708	0.0282
signal transduction involved in mitotic G1 DNA damage checkpoint	GO	5 out of 7	16.2057	upregulated	1	0.0242328	0.9761	upregulated	4	3.79104	0.0226	downregulated	9	6.86057	0.001	downregulated	4	2.69796	0.0673	upregulated	11	6.55466	0.0014	upregulated	3	1.88394	0.152	upregulated	5	2.02389	0.1321
signal transduction involved in mitotic cell cycle checkpoint	GO	5 out of 7	16.2057	upregulated	1	0.0242328	0.9761	upregulated	4	3.79104	0.0226	downregulated	9	6.86057	0.001	downregulated	4	2.69796	0.0673	upregulated	11	6.55466	0.0014	upregulated	3	1.88394	0.152	upregulated	5	2.02389	0.1321
signal transduction involved in mitotic DNA damage checkpoint	GO	5 out of 7	16.2057	upregulated	1	0.0242328	0.9761	upregulated	4	3.79104	0.0226	downregulated	9	6.86057	0.001	downregulated	4	2.69796	0.0673	upregulated	11	6.55466	0.0014	upregulated	3	1.88394	0.152	upregulated	5	2.02389	0.1321
positive regulation of leukocyte apoptotic process	GO	5 out of 7	16.1805	upregulated	2	3.84553	0.0214					downregulated	5	6.638	0.0013	downregulated	2	3.39873	0.0334	upregulated	4	3.76939	0.0231	upregulated	1	3.26436	0.0382	upregulated	2	2.95557	0.052
protein tyrosine kinase binding	GO	4 out of 7	16.1103	upregulated	1	0.42591	0.6532	upregulated	3	1.118	0.3269	downregulated	6	2.53993	0.0789	upregulated	1	1.91955	0.1467	upregulated	12	7.20375	0.0007	upregulated	8	3.2113	0.0403	upregulated	11	6.61876	0.0013
C21-steroid hormone metabolic process	GO	4 out of 7	16.0943	upregulated	1	1.6237	0.1972					downregulated	1	0.463692	0.629	downregulated	3	4.8837	0.0076	upregulated	3	10.7084	2.2e-05	downregulated	3	1.0011	0.3675	upregulated	3	2.66329	0.0697
S100 protein binding	GO	6 out of 7	16.0819	downregulated	1	1.56579	0.2089	downregulated	1	1.31611	0.2682	upregulated	1	0.97011	0.379	downregulated	2	3.7361	0.0238	upregulated	2	3.65735	0.0258	upregulated	1	2.41235	0.0896	upregulated	3	4.36432	0.0127
mitotic G2/M transition checkpoint	GO	5 out of 7	16.0329	upregulated	1	0.477588	0.6203	upregulated	2	1.12408	0.325	downregulated	5	5.61175	0.0037	downregulated	4	5.23711	0.0053	upregulated	6	4.36029	0.0128	upregulated	2	1.1889	0.3046	upregulated	4	1.23652	0.2904
Fc-gamma receptor signaling pathway involved in phagocytosis	GO	5 out of 7	16.0218	downregulated	5	2.89488	0.0553	downregulated	1	2.92908	0.0534	downregulated	10	5.39279	0.0045	downregulated	8	4.91838	0.0073	downregulated	2	0.714066	0.4896	downregulated	13	2.59345	0.0748	upregulated	9	3.19421	0.041
response to peptide hormone	GO	5 out of 7	16.0065	downregulated	9	3.39896	0.0334	upregulated	14	7.93469	0.0004	downregulated	22	2.82545	0.0593	downregulated	15	3.4861	0.0306	upregulated	50	11.0898	1.5e-05	downregulated	38	5.81625	0.003	upregulated	38	8.95711	0.0001
endocytic patch	GO	4 out of 7	16.0001	downregulated	2	4.31911	0.0133					downregulated	2	3.59636	0.0274									upregulated	3	3.20307	0.0406	upregulated	2	4.88156	0.0076
actin cortical patch	GO	4 out of 7	16.0001	downregulated	2	4.31911	0.0133					downregulated	2	3.59636	0.0274									upregulated	3	3.20307	0.0406	upregulated	2	4.88156	0.0076
ectoderm development	GO	5 out of 7	15.9991									downregulated	4	5.28378	0.0051	downregulated	1	0.743638	0.4754	upregulated	4	3.25503	0.0386	upregulated	1	3.44908	0.0318	upregulated	3	3.26757	0.0381
nuclear transport	GO	5 out of 7	15.9688	downregulated	4	0.213085	0.8081	upregulated	17	4.05466	0.0173	upregulated	9	1.43374	0.2384	downregulated	16	3.97898	0.0187	upregulated	39	9.22376	9.9e-05	upregulated	19	2.87799	0.0562	upregulated	24	5.16334	0.0057
epidermal cell differentiation	GO	6 out of 7	15.8101	downregulated	5	1.71868	0.1793	downregulated	5	2.52194	0.0803	downregulated	12	3.73463	0.0239	downregulated	2	1.71735	0.1795	upregulated	11	3.16513	0.0422	downregulated	8	1.5073	0.2215	upregulated	14	2.95238	0.0522
lipid transport	GO	3 out of 7	15.7566	downregulated	7	1.79079	0.1668	upregulated	13	2.4211	0.0888	downregulated	21	6.66698	0.0013	downregulated	15	9.71997	6e-05	upregulated	15	3.3203	0.0361	upregulated	20	9.52556	7.3e-05	upregulated	27	10.4678	2.8e-05
histone binding	GO	3 out of 7	15.5771	upregulated	14	2.43839	0.0873	upregulated	17	7.50062	0.0006	upregulated	5	1.28078	0.2778	upregulated	5	2.88803	0.0557	upregulated	42	20.2446	1.6e-09	upregulated	20	5.19607	0.0055	upregulated	23	4.24419	0.0143
transcriptional activator activity, RNA polymerase II transcription factor binding	GO	6 out of 7	15.5696	downregulated	2	2.2978	0.1005					downregulated	2	4.21778	0.0147	downregulated	2	3.67306	0.0254	upregulated	3	2.5831	0.0755	upregulated	1	0.34633	0.7073	upregulated	3	2.45149	0.0862
positive regulation of chromosome organization	GO	4 out of 7	15.4778	upregulated	11	2.53116	0.0796	upregulated	9	3.83248	0.0217	downregulated	15	3.09533	0.0453	downregulated	13	5.28727	0.0051	upregulated	31	11.2359	1.3e-05	downregulated	18	0.650988	0.5215	upregulated	18	2.87399	0.0565
mitotic G1/S transition checkpoint	GO	5 out of 7	15.4366	upregulated	3	0.273072	0.761	upregulated	4	3.55457	0.0286	downregulated	9	6.2306	0.002	downregulated	5	2.73367	0.065	upregulated	12	6.66671	0.0013	upregulated	3	1.67744	0.1869	upregulated	6	1.95582	0.1414
cytolysis	GO	5 out of 7	15.4195									downregulated	2	2.84847	0.0579	downregulated	1	2.2474	0.1057	upregulated	1	3.76939	0.0231	upregulated	2	3.5987	0.0274	upregulated	1	2.95557	0.052
salivary gland morphogenesis	GO	6 out of 7	15.4131	downregulated	2	1.66368	0.1894	downregulated	2	3.83779	0.0215	downregulated	4	3.69972	0.0247	downregulated	2	0.692785	0.5002	upregulated	5	3.22906	0.0396	upregulated	5	2.29008	0.1013	downregulated	1	2.6635	0.0697
myosin complex	GO	6 out of 7	15.3436	downregulated	2	3.0996	0.0451	downregulated	1	0.376892	0.686	downregulated	8	6.00055	0.0025	downregulated	4	4.03608	0.0177	downregulated	4	0.791569	0.4531	upregulated	4	1.08472	0.338	upregulated	5	1.53736	0.2149
regulation of ubiquitin-dependent protein catabolic process	GO	4 out of 7	15.2524	upregulated	12	2.36606	0.0939	upregulated	6	1.60098	0.2017	downregulated	12	2.40449	0.0903	upregulated	2	1.71872	0.1793	upregulated	18	6.38083	0.0017	upregulated	12	5.01437	0.0066	upregulated	18	7.13846	0.0008
negative regulation of leukocyte apoptotic process	GO	5 out of 7	15.1919	upregulated	1	1.24366	0.2883					downregulated	5	3.79144	0.0226	downregulated	4	4.11023	0.0164	upregulated	5	4.07207	0.017	upregulated	2	0.651124	0.5215	upregulated	5	3.81072	0.0221
response to unfolded protein	GO	3 out of 7	15.188	downregulated	3	4.10234	0.0165	upregulated	8	1.55515	0.2112	upregulated	6	1.68415	0.1856	downregulated	4	0.315496	0.7294	upregulated	27	14.0095	8.2e-07	upregulated	18	14.3533	5.8e-07	upregulated	21	9.88804	5.1e-05
regulation of protein catabolic process	GO	5 out of 7	15.1813	upregulated	23	1.76264	0.1716	upregulated	20	3.89683	0.0203	downregulated	23	2.14669	0.1169	downregulated	17	1.18216	0.3066	upregulated	43	4.79339	0.0083	upregulated	25	4.53766	0.0107	upregulated	39	8.1809	0.0003
negative regulation of bone development	GO	3 out of 7	15.1606									downregulated	1	4.77631	0.0084									upregulated	1	5.75904	0.0032	upregulated	1	4.62524	0.0098
regulation of skeletal muscle cell differentiation	GO	5 out of 7	15.1308	upregulated	3	4.1564	0.0157	downregulated	1	1.48715	0.226	downregulated	2	2.33424	0.0969					upregulated	3	4.80674	0.0082	upregulated	3	4.59677	0.0101	upregulated	3	6.06228	0.0023
signal transduction in response to DNA damage	GO	6 out of 7	15.1211	downregulated	1	1.79531	0.1661	upregulated	8	3.4851	0.0307	downregulated	10	3.53247	0.0292	downregulated	5	1.38032	0.2515	upregulated	16	5.88924	0.0028	upregulated	7	3.12693	0.0439	upregulated	10	2.88196	0.056
positive regulation of transcription from RNA polymerase II promoter in response to stress	GO	4 out of 7	14.9995	downregulated	3	6.7554	0.0012	upregulated	2	1.53149	0.2162	downregulated	3	2.02717	0.1317	downregulated	3	2.87279	0.0565	downregulated	2	0.890472	0.4105	upregulated	2	2.11258	0.1209	upregulated	6	5.68064	0.0034
kinase inhibitor activity	GO	5 out of 7	14.9982	upregulated	5	2.31779	0.0985	downregulated	1	1.33482	0.2632	downregulated	2	1.28774	0.2759	downregulated	1	1.28774	0.2759	upregulated	10	4.39538	0.0123	upregulated	2	2.94926	0.0524	upregulated	11	7.3488	0.0006
myosin II complex	GO	6 out of 7	14.9925					downregulated	1	1.13362	0.3219	downregulated	5	6.13436	0.0022	downregulated	2	5.01702	0.0066	upregulated	2	0.534141	0.5862	upregulated	2	1.21962	0.2953	upregulated	2	0.953761	0.3853
response to nutrient	GO	5 out of 7	14.9874	downregulated	5	3.50998	0.0299	upregulated	11	7.68516	0.0005	downregulated	16	3.05932	0.0469	downregulated	16	9.78243	5.6e-05	upregulated	13	4.05149	0.0174	downregulated	28	4.70115	0.0091	upregulated	13	6.97049	0.0009
alpha-linolenic acid metabolic process	GO	6 out of 7	14.964	downregulated	1	1.47266	0.2293	downregulated	1	1.94866	0.1425	downregulated	3	4.44548	0.0117	downregulated	3	4.93879	0.0072	downregulated	2	2.68912	0.0679	upregulated	1	1.77298	0.1698	upregulated	1	3.07459	0.0462
positive T cell selection	GO	6 out of 7	14.9499	downregulated	2	1.87495	0.1534					downregulated	4	4.91185	0.0074	downregulated	2	4.83178	0.008	upregulated	1	0.105523	0.8999	upregulated	2	1.09142	0.3357	upregulated	2	2.1344	0.1183
regulation of transcription from RNA polymerase II promoter in response to hypoxia	GO	6 out of 7	14.8742	downregulated	2	3.24886	0.0388	upregulated	1	1.94973	0.1423	downregulated	4	2.53861	0.079	downregulated	4	3.15309	0.0427	upregulated	4	1.89994	0.1496	upregulated	3	1.02307	0.3595	upregulated	7	4.9604	0.007
Fc-epsilon receptor signaling pathway	GO	3 out of 7	14.8326	upregulated	5	1.35481	0.258	upregulated	1	0.177789	0.8371	downregulated	12	7.70462	0.0005	downregulated	12	11.7208	8.1e-06	upregulated	10	2.19098	0.1118	downregulated	10	2.518	0.0806	downregulated	8	2.73312	0.065
mesodermal cell differentiation	GO	6 out of 7	14.8059	downregulated	1	1.82775	0.1608					downregulated	4	7.30462	0.0007	downregulated	2	3.57203	0.0281	upregulated	1	0.88882	0.4111	upregulated	1	0.311724	0.7322	upregulated	2	0.900985	0.4062
transcription cofactor binding	GO	5 out of 7	14.7484	upregulated	2	0.352693	0.7028	upregulated	3	0.98494	0.3735	downregulated	3	3.27611	0.0378	downregulated	2	2.73997	0.0646	upregulated	7	3.05675	0.047	upregulated	5	1.80638	0.1642	upregulated	9	5.20679	0.0055
insulin receptor substrate binding	GO	5 out of 7	14.7458	upregulated	2	2.38991	0.0916	upregulated	1	0.88142	0.4142	downregulated	1	2.11974	0.1201	downregulated	1	1.66697	0.1888	upregulated	2	4.57333	0.0103	upregulated	1	1.67501	0.1873	upregulated	3	7.98205	0.0003
response to redox state	GO	5 out of 7	14.7423					downregulated	1	4.99735	0.0068	downregulated	2	3.46423	0.0313					upregulated	2	2.67762	0.0687	upregulated	2	2.83303	0.0588	upregulated	1	0.77011	0.463
positive regulation of extracellular matrix organization	GO	5 out of 7	14.6461					upregulated	1	0.636653	0.5291	downregulated	4	5.41614	0.0044	downregulated	1	0.837446	0.4328	upregulated	2	2.43213	0.0878	upregulated	2	2.75589	0.0636	upregulated	3	3.84114	0.0215
proximal/distal pattern formation	GO	4 out of 7	14.6259	upregulated	1	0.494422	0.6099					downregulated	3	3.68573	0.0251	downregulated	2	2.77641	0.0623	downregulated	2	4.6437	0.0096	upregulated	5	6.39298	0.0017	upregulated	3	6.90886	0.001
dioxygenase activity	GO	5 out of 7	14.6051	downregulated	3	2.39089	0.0915	upregulated	6	2.44662	0.0866	downregulated	5	0.752375	0.4712	upregulated	3	3.27369	0.0379	upregulated	17	9.62049	6.6e-05	upregulated	4	2.57559	0.0761	upregulated	11	4.98606	0.0068
positive regulation of endoplasmic reticulum unfolded protein response	GO	5 out of 7	14.5537									downregulated	2	3.17061	0.042	downregulated	1	0.746405	0.4741	upregulated	3	4.16516	0.0155	upregulated	2	2.76249	0.0631	upregulated	3	3.709	0.0245
determination of adult lifespan	GO	4 out of 7	14.5442									downregulated	4	7.47737	0.0006	downregulated	1	1.56132	0.2099	upregulated	4	4.37457	0.0126	upregulated	1	1.54526	0.2133	downregulated	1	0.414304	0.6608
neurotrophin signaling pathway	GO	6 out of 7	14.4767	downregulated	1	1.62249	0.1974					downregulated	3	0.764908	0.4654	downregulated	1	1.0701	0.343	upregulated	5	2.38483	0.0921	upregulated	3	3.93404	0.0196	upregulated	6	4.70035	0.0091
regulation of Notch signaling pathway	GO	5 out of 7	14.3901	downregulated	5	2.47952	0.0838	upregulated	2	1.56235	0.2096	downregulated	9	2.06252	0.1271	downregulated	3	0.916945	0.3997	upregulated	14	9.62618	6.6e-05	downregulated	14	3.49446	0.0304	upregulated	13	4.36174	0.0128
response to peptide	GO	5 out of 7	14.3563	downregulated	14	3.24285	0.0391	upregulated	17	11.9458	6.5e-06	downregulated	29	4.22406	0.0146	downregulated	23	6.23794	0.002	upregulated	54	9.61419	6.7e-05	downregulated	44	6.09627	0.0023	upregulated	45	9.07934	0.0001
MLL1/2 complex	GO	5 out of 7	14.2578	upregulated	2	0.973401	0.3778					downregulated	2	0.541042	0.5821	downregulated	3	2.42113	0.0888	upregulated	8	7.5215	0.0005	upregulated	3	2.10711	0.1216	upregulated	4	2.64043	0.0713
thymic T cell selection	GO	5 out of 7	14.2511	upregulated	1	0.826196	0.4377					downregulated	2	6.13218	0.0022	downregulated	2	5.69263	0.0034	upregulated	1	0.258611	0.7721	upregulated	2	1.80412	0.1646	upregulated	1	1.18975	0.3043
negative regulation of oxidative stress-induced cell death	GO	5 out of 7	14.2072	upregulated	4	2.53283	0.0794	upregulated	2	3.59938	0.0273	downregulated	4	3.21633	0.0401	downregulated	2	1.81664	0.1626	upregulated	6	6.09892	0.0022	upregulated	3	3.43918	0.0321	upregulated	6	5.76834	0.0031
negative regulation of cellular response to oxidative stress	GO	5 out of 7	14.2072	upregulated	4	2.53283	0.0794	upregulated	2	3.59938	0.0273	downregulated	4	3.21633	0.0401	downregulated	2	1.81664	0.1626	upregulated	6	6.09892	0.0022	upregulated	3	3.43918	0.0321	upregulated	6	5.76834	0.0031
cell adhesion molecule binding	GO	4 out of 7	14.1767	upregulated	15	0.660364	0.5167	upregulated	16	1.14391	0.3186	downregulated	42	6.21114	0.002	downregulated	29	5.14738	0.0058	downregulated	41	6.24371	0.0019	upregulated	30	5.81055	0.003	upregulated	49	5.05558	0.0064
peptide-lysine-N-acetyltransferase activity	GO	5 out of 7	14.1367	upregulated	3	0.385946	0.6798	upregulated	5	3.25796	0.0385	downregulated	4	0.465889	0.6276	downregulated	2	0.298354	0.742	upregulated	16	13.3688	1.6e-06	upregulated	5	1.37	0.2541	upregulated	8	2.27765	0.1025
actin polymerization or depolymerization	GO	5 out of 7	14.1179	upregulated	2	1.70952	0.181	downregulated	2	5.12769	0.0059	downregulated	4	1.47605	0.2285	downregulated	1	0.606787	0.5451	downregulated	4	2.02215	0.1324	upregulated	5	5.0224	0.0066	upregulated	7	5.61666	0.0036
trabecula morphogenesis	GO	6 out of 7	14.1041	downregulated	5	4.71777	0.0089					downregulated	3	1.75846	0.1723	downregulated	4	2.06494	0.1268	upregulated	7	3.58057	0.0279	upregulated	4	1.32037	0.267	upregulated	4	0.662013	0.5158
transcription factor activity, RNA polymerase II transcription factor binding	GO	6 out of 7	14.0555	downregulated	2	0.77087	0.4626	upregulated	2	2.6641	0.0697	downregulated	2	3.16368	0.0423	downregulated	5	3.57732	0.028	upregulated	7	3.07352	0.0463	upregulated	4	0.831888	0.4352	upregulated	8	5.30228	0.005
positive regulation of telomere maintenance via telomere lengthening	GO	5 out of 7	14.0439	upregulated	3	2.69971	0.0672	downregulated	1	3.68984	0.025	downregulated	3	3.52343	0.0295	downregulated	3	4.16066	0.0156	upregulated	6	3.74915	0.0235	downregulated	5	1.70452	0.1819	upregulated	5	3.32504	0.036
extracellular matrix	GO	5 out of 7	13.9739	downregulated	14	3.33402	0.0356	upregulated	9	1.66654	0.1889	downregulated	18	3.37869	0.0341	upregulated	1	0.399518	0.6706	upregulated	20	2.28069	0.1022	upregulated	16	2.89299	0.0554	upregulated	22	4.15358	0.0157
wound healing	GO	3 out of 7	13.9091	upregulated	11	0.90325	0.4053	upregulated	17	4.64768	0.0096	downregulated	42	10.1913	3.7e-05	downregulated	24	8.69604	0.0002	downregulated	24	2.87946	0.0562	downregulated	41	2.99783	0.0499	upregulated	38	6.44999	0.0016
negative regulation of cellular senescence	GO	4 out of 7	13.9043					upregulated	1	0.659439	0.5171	downregulated	1	0.418495	0.658					upregulated	4	4.93927	0.0072	upregulated	3	2.69892	0.0673	upregulated	4	6.5071	0.0015
negative regulation of muscle tissue development	GO	3 out of 7	13.8688	upregulated	3	3.05679	0.047					downregulated	6	7.79238	0.0004	upregulated	1	2.31403	0.0989	upregulated	5	6.23407	0.002	upregulated	4	5.21314	0.0054	downregulated	3	2.89423	0.0553
integrin complex	GO	3 out of 7	13.8525	downregulated	2	2.50081	0.082					downregulated	5	8.04886	0.0003	downregulated	5	9.41128	8.2e-05	downregulated	1	2.26475	0.1039	downregulated	1	2.08409	0.1244	downregulated	1	1.75959	0.1721
COP9 signalosome	GO	4 out of 7	13.8481	upregulated	3	2.71138	0.0664					upregulated	3	5.99014	0.0025	downregulated	1	1.00235	0.367	upregulated	5	9.76332	5.8e-05	upregulated	3	5.892	0.0028	upregulated	2	5.892	0.0028
mesoderm development	GO	7 out of 7	13.8342	downregulated	7	4.26138	0.0141	downregulated	2	0.56435	0.5687	downregulated	8	3.31334	0.0364	downregulated	5	4.15593	0.0157	upregulated	12	1.03262	0.3561	upregulated	6	0.291581	0.7471	upregulated	5	0.214988	0.8066
negative regulation of response to oxidative stress	GO	5 out of 7	13.8248	upregulated	4	2.35047	0.0953	upregulated	2	3.51514	0.0297	downregulated	4	3.13387	0.0435	downregulated	2	1.75723	0.1725	upregulated	6	6.00901	0.0025	upregulated	3	3.37633	0.0342	upregulated	6	5.41394	0.0045
extracellular matrix binding	GO	4 out of 7	13.8097	downregulated	1	2.83852	0.0585	upregulated	1	3.17471	0.0418	downregulated	5	7.30855	0.0007	downregulated	5	6.12535	0.0022	downregulated	2	1.46934	0.2301	upregulated	4	2.18135	0.1129	upregulated	5	1.74171	0.1752
regulation of vasoconstriction	GO	4 out of 7	13.7154	downregulated	1	3.55729	0.0285	upregulated	3	2.12287	0.1197	upregulated	4	3.78684	0.0227	downregulated	6	6.26056	0.0019	downregulated	2	3.45119	0.0317	upregulated	3	3.98087	0.0187	upregulated	4	5.49077	0.0041
heart trabecula morphogenesis	GO	5 out of 7	13.6691	downregulated	4	4.30518	0.0135					downregulated	1	0.864758	0.4212	downregulated	4	2.97474	0.0511	upregulated	6	4.31705	0.0133	upregulated	4	1.94974	0.1423	downregulated	1	0.742408	0.476
quinone metabolic process	GO	3 out of 7	13.6569	upregulated	1	0.802111	0.4484	upregulated	1	1.4754	0.2287	downregulated	3	1.35811	0.2571	downregulated	4	6.5572	0.0014	upregulated	4	10.3849	3.1e-05	downregulated	5	2.3657	0.0939	upregulated	1	2.16604	0.1146
large ribosomal subunit	GO	2 out of 7	13.6209	upregulated	10	3.6448	0.0261	upregulated	5	1.0564	0.3477	upregulated	3	0.761765	0.4668	upregulated	1	0.604979	0.5461	downregulated	6	4.24585	0.0143	upregulated	11	4.4178	0.0121	upregulated	25	19.5169	3.3e-09
regulation of ventricular cardiac muscle cell action potential	GO	4 out of 7	13.6188					downregulated	1	4.775	0.0084	downregulated	3	3.92197	0.0198					downregulated	1	0.571148	0.5649	upregulated	1	0.821541	0.4398	upregulated	3	4.67146	0.0094
regulation of cellular protein catabolic process	GO	5 out of 7	13.6086	upregulated	19	2.92928	0.0534	upregulated	14	3.50156	0.0302	downregulated	16	2.82354	0.0594	downregulated	12	1.23931	0.2896	upregulated	28	5.56399	0.0038	upregulated	18	4.8792	0.0076	upregulated	23	5.53335	0.004
positive regulation of p38MAPK cascade	GO	5 out of 7	13.6001	downregulated	1	3.86866	0.0209	downregulated	1	1.37627	0.2525	upregulated	1	0.985162	0.3734					upregulated	3	1.75634	0.1727	upregulated	3	2.66681	0.0695	upregulated	5	4.91722	0.0073
genitalia development	GO	6 out of 7	13.5039	downregulated	2	1.66949	0.1883	downregulated	1	1.11236	0.3288	downregulated	3	4.07411	0.017					upregulated	3	1.5593	0.2103	upregulated	3	2.90674	0.0547	upregulated	4	2.18188	0.1128
beta-catenin-TCF complex	GO	4 out of 7	13.4676	downregulated	1	1.07196	0.3423	upregulated	1	0.906972	0.4037	upregulated	1	1.1345	0.3216					upregulated	4	9.40054	8.3e-05	upregulated	2	1.75093	0.1736	upregulated	2	3.2856	0.0374
regulation of PERK-mediated unfolded protein response	GO	5 out of 7	13.4068					upregulated	1	0.992992	0.3705	downregulated	2	3.53678	0.0291	downregulated	1	1.05353	0.3487	upregulated	3	2.98741	0.0504	upregulated	1	3.0343	0.0481	upregulated	2	3.78778	0.0226
response to pH	GO	5 out of 7	13.3893	downregulated	1	5.8089	0.003	upregulated	1	1.84783	0.1576	downregulated	2	2.33112	0.0972	downregulated	1	4.01812	0.018	downregulated	3	1.96531	0.1401	upregulated	2	2.49364	0.0826	upregulated	2	2.55065	0.078
positive regulation of cellular protein catabolic process	GO	4 out of 7	13.3589	upregulated	10	2.18725	0.1122	upregulated	8	2.71827	0.066	downregulated	13	4.55006	0.0106	downregulated	8	1.62061	0.1978	upregulated	17	6.69186	0.0012	upregulated	11	4.82252	0.008	upregulated	13	5.40194	0.0045
regulation of chloride transport	GO	5 out of 7	13.3589	downregulated	1	1.62427	0.1971					downregulated	1	1.84747	0.1576	downregulated	1	2.38202	0.0924					upregulated	1	3.72318	0.0242	upregulated	1	3.78193	0.0228
RNA polymerase II repressing transcription factor binding	GO	5 out of 7	13.322	upregulated	2	1.4258	0.2403	downregulated	1	1.83556	0.1595	downregulated	3	2.64385	0.0711	downregulated	1	0.835979	0.4334	upregulated	9	8.01386	0.0003	downregulated	4	0.936073	0.3922	upregulated	3	2.35466	0.0949
regulation of response to endoplasmic reticulum stress	GO	5 out of 7	13.2719	upregulated	6	1.97655	0.1385	upregulated	4	1.80422	0.1646	downregulated	5	1.76847	0.1706	downregulated	3	0.640742	0.5269	upregulated	12	3.95416	0.0192	upregulated	5	5.10437	0.0061	upregulated	8	5.58488	0.0038
leukocyte chemotaxis	GO	4 out of 7	13.2716	upregulated	1	1.13295	0.3221	upregulated	5	4.1928	0.0151	downregulated	11	7.36539	0.0006	downregulated	7	6.44477	0.0016	upregulated	9	4.5044	0.0111	downregulated	9	2.89713	0.0552	upregulated	8	3.17992	0.0416
secondary palate development	GO	5 out of 7	13.2612	downregulated	2	2.21841	0.1088					downregulated	3	3.08895	0.0455					upregulated	5	4.62968	0.0098	upregulated	3	1.80388	0.1647	upregulated	3	1.52023	0.2187
lamellipodium	GO	4 out of 7	13.2414	downregulated	7	4.67668	0.0093	upregulated	8	1.45963	0.2323	downregulated	19	2.9251	0.0537	downregulated	16	7.84176	0.0004	downregulated	15	3.22343	0.0398	downregulated	23	4.52926	0.0108	upregulated	25	7.01016	0.0009
negative regulation of response to endoplasmic reticulum stress	GO	5 out of 7	13.2155	upregulated	4	2.97988	0.0508	downregulated	2	1.63218	0.1955	upregulated	2	1.56112	0.2099	downregulated	1	0.274903	0.7596	upregulated	7	4.47679	0.0114	upregulated	3	5.68631	0.0034	upregulated	4	5.68631	0.0034
oxidoreductase activity, acting on single donors with incorporation of molecular oxygen, incorporation of two atoms of oxygen	GO	5 out of 7	13.171	downregulated	1	3.8895	0.0205	upregulated	1	2.28139	0.1021	downregulated	2	2.25318	0.1051	downregulated	1	4.53655	0.0107	upregulated	2	3.70936	0.0245					upregulated	2	1.0638	0.3451
response to muscle stretch	GO	5 out of 7	13.1453					downregulated	2	5.15206	0.0058	downregulated	3	1.56672	0.2087	downregulated	2	3.44854	0.0318	upregulated	2	2.10984	0.1213	downregulated	1	2.73594	0.0648	upregulated	4	3.60412	0.0272
negative regulation of cell adhesion	GO	2 out of 7	13.1263	upregulated	10	1.81926	0.1621	upregulated	10	0.967878	0.3799	downregulated	28	11.3657	1.2e-05	downregulated	12	4.54777	0.0106	upregulated	22	5.35492	0.0047	upregulated	17	3.21819	0.04	upregulated	28	6.9504	0.001
dendritic cell migration	GO	4 out of 7	13.1149					downregulated	1	4.75278	0.0086	downregulated	3	2.48758	0.0831					upregulated	2	5.43149	0.0044	downregulated	2	2.50381	0.0818	upregulated	1	2.94685	0.0525
signal transduction involved in DNA damage checkpoint	GO	5 out of 7	13.1148	upregulated	2	0.0566625	0.9449	upregulated	7	4.5134	0.011	downregulated	9	5.08159	0.0062	downregulated	5	2.43174	0.0879	upregulated	13	6.78654	0.0011	upregulated	4	1.56968	0.2081	upregulated	5	1.81527	0.1628
DNA repair	GO	1 out of 7	13.0887	upregulated	30	2.97728	0.0509	upregulated	30	10.8195	2e-05	downregulated	32	2.09329	0.1233	downregulated	25	4.833	0.008	upregulated	61	13.0887	2.1e-06	upregulated	24	0.88019	0.4147	upregulated	28	0.127632	0.8802
protein C-terminus binding	GO	4 out of 7	13.0802	upregulated	11	1.58274	0.2054	upregulated	9	2.42623	0.0884	downregulated	15	2.72273	0.0657	downregulated	9	1.43767	0.2375	upregulated	22	8.48018	0.0002	downregulated	22	4.98624	0.0068	upregulated	22	7.0086	0.0009
regulation of response to wounding	GO	4 out of 7	13.076	downregulated	6	1.66597	0.189	upregulated	9	4.83061	0.008	downregulated	16	8.88271	0.0001	downregulated	12	6.81691	0.0011	downregulated	11	1.36372	0.2557	upregulated	7	1.51139	0.2206	upregulated	8	1.90473	0.1489
oxidoreductase activity, acting on single donors with incorporation of molecular oxygen	GO	5 out of 7	13.0268	downregulated	1	3.8547	0.0212	upregulated	1	2.26145	0.1042	downregulated	2	2.21809	0.1088	downregulated	1	4.50037	0.0111	upregulated	2	3.67015	0.0255					upregulated	2	1.04495	0.3517
cell fate commitment	GO	5 out of 7	13.013	downregulated	8	1.44355	0.2361	downregulated	3	2.70872	0.0666	downregulated	24	8.93622	0.0001	downregulated	7	1.4006	0.2465	upregulated	22	5.55495	0.0039	downregulated	26	3.81082	0.0221	downregulated	18	3.2202	0.0399
core promoter binding	GO	3 out of 7	13.0028	upregulated	2	0.367639	0.6924	upregulated	2	0.864723	0.4212	upregulated	2	2.12272	0.1197	downregulated	3	1.30829	0.2703	upregulated	8	4.26832	0.014	upregulated	1	0.698941	0.4971	upregulated	11	10.7812	2.1e-05
centriole assembly	GO	6 out of 7	12.9952					downregulated	1	2.50737	0.0815	downregulated	5	3.3547	0.0349	downregulated	2	1.44757	0.2351	upregulated	4	2.89204	0.0555	upregulated	1	1.43247	0.2387	upregulated	3	1.36106	0.2564
embryonic digit morphogenesis	GO	4 out of 7	12.9833	upregulated	5	1.61912	0.1981	downregulated	1	2.90025	0.055	upregulated	2	0.839494	0.4319	upregulated	1	0.918966	0.3989	upregulated	11	5.54126	0.0039	upregulated	5	1.6792	0.1865	upregulated	9	6.24019	0.0019
positive regulation of ERBB signaling pathway	GO	5 out of 7	12.9644	downregulated	3	4.77867	0.0084	upregulated	1	0.652769	0.5206	downregulated	4	4.47847	0.0114	downregulated	2	1.33126	0.2641	downregulated	1	1.02003	0.3606	upregulated	2	1.19942	0.3014	upregulated	4	2.84941	0.0579
regulation of endoplasmic reticulum unfolded protein response	GO	5 out of 7	12.9093					upregulated	1	0.433197	0.6484	downregulated	4	2.74036	0.0645	downregulated	2	1.34212	0.2613	upregulated	5	3.02627	0.0485	upregulated	2	2.34994	0.0954	upregulated	5	3.88382	0.0206
carbohydrate derivative transport	GO	7 out of 7	12.907	downregulated	2	1.12191	0.3257	downregulated	2	2.78228	0.0619	downregulated	5	2.77562	0.0623	downregulated	4	3.58376	0.0278	upregulated	5	0.852289	0.4264	upregulated	2	1.24208	0.2888	upregulated	4	0.549071	0.5775
protein complex involved in cell adhesion	GO	3 out of 7	12.8553	downregulated	2	2.35195	0.0952					downregulated	5	7.36458	0.0006	downregulated	5	8.94006	0.0001	downregulated	1	2.15814	0.1155	downregulated	1	1.98229	0.1378	downregulated	1	1.66084	0.19
signal transduction involved in cell cycle checkpoint	GO	5 out of 7	12.8158	upregulated	2	0.0535668	0.9478	upregulated	7	4.45687	0.0116	downregulated	9	4.97281	0.0069	downregulated	5	2.38053	0.0925	upregulated	13	6.61413	0.0013	upregulated	4	1.55725	0.2107	upregulated	5	1.80151	0.165
sequestering of metal ion	GO	2 out of 7	12.8008									downregulated	2	8.48542	0.0002													upregulated	3	4.3154	0.0134
cohesin complex	GO	4 out of 7	12.7788	downregulated	1	2.26365	0.104	downregulated	1	2.11974	0.1201									upregulated	3	4.28908	0.0137					upregulated	4	4.10634	0.0165
regulation of carbohydrate metabolic process	GO	1 out of 7	12.7762	upregulated	7	2.84424	0.0582	downregulated	6	2.33068	0.0972	upregulated	4	1.69507	0.1836	downregulated	5	2.89709	0.0552	upregulated	21	12.7762	2.8e-06	upregulated	8	5.23232	0.0053	upregulated	16	8.2945	0.0002
azurophil granule membrane	GO	4 out of 7	12.7699	upregulated	1	1.47773	0.2282	upregulated	5	4.32016	0.0133	downregulated	6	4.85709	0.0078	downregulated	8	10.6852	2.3e-05	downregulated	7	3.16859	0.0421	upregulated	3	3.56253	0.0284	upregulated	3	2.6316	0.072
positive regulation of glutamate receptor signaling pathway	GO	3 out of 7	12.7697																	upregulated	2	5.49368	0.0041	upregulated	1	4.03125	0.0178	upregulated	1	3.24474	0.039
sex differentiation	GO	5 out of 7	12.7516	downregulated	6	2.46737	0.0848	upregulated	8	4.81125	0.0081	downregulated	14	2.8215	0.0595	downregulated	12	1.66649	0.1889	upregulated	29	6.0551	0.0023	upregulated	16	2.59892	0.0744	upregulated	22	8.00862	0.0003
demethylase activity	GO	5 out of 7	12.7238	downregulated	1	1.24092	0.2891	downregulated	1	1.2007	0.301	upregulated	1	1.25235	0.2858	upregulated	2	4.37885	0.0125	upregulated	9	7.29681	0.0007	upregulated	3	3.38278	0.034	upregulated	6	5.23373	0.0053
vascular smooth muscle cell differentiation	GO	5 out of 7	12.7098	downregulated	2	4.54274	0.0106	upregulated	1	1.73587	0.1762	downregulated	1	0.426992	0.6525					upregulated	3	4.39897	0.0123	upregulated	2	3.61415	0.0269	upregulated	2	1.46285	0.2316
regulation of integrin-mediated signaling pathway	GO	5 out of 7	12.7064					upregulated	1	3.58182	0.0278	downregulated	2	3.83882	0.0215	downregulated	2	2.82179	0.0595	upregulated	2	2.00601	0.1345	upregulated	2	4.10383	0.0165	upregulated	2	3.51772	0.0297
negative regulation of tumor necrosis factor superfamily cytokine production	GO	5 out of 7	12.6767	downregulated	1	1.28705	0.2761	upregulated	1	2.68145	0.0685	downregulated	5	5.64542	0.0035	downregulated	4	6.13373	0.0022	downregulated	1	0.947513	0.3877	upregulated	3	1.64717	0.1926	upregulated	3	1.59232	0.2035
regulation of miRNA metabolic process	GO	4 out of 7	12.6366					upregulated	1	2.18494	0.1125	downregulated	4	5.26006	0.0052	downregulated	2	2.91168	0.0544	upregulated	2	3.51804	0.0297	downregulated	2	1.07624	0.3409	upregulated	3	4.20798	0.0149
peptidyl-threonine dephosphorylation	GO	4 out of 7	12.5082	upregulated	1	1.27283	0.28					downregulated	2	3.73156	0.024	downregulated	2	3.66808	0.0255	upregulated	1	1.79286	0.1665	upregulated	4	4.58852	0.0102	downregulated	3	2.65256	0.0705
negative T cell selection	GO	2 out of 7	12.5014	upregulated	1	1.20047	0.3011					downregulated	2	7.06749	0.0009	downregulated	2	6.63436	0.0013
transcription factor activity, transcription factor binding	GO	6 out of 7	12.485	downregulated	2	0.572956	0.5639	upregulated	4	3.16025	0.0424	downregulated	2	2.97711	0.0509	downregulated	5	2.97235	0.0512	upregulated	8	3.49372	0.0304	upregulated	4	0.560167	0.5711	upregulated	9	5.06893	0.0063
defense response to Gram-negative bacterium	GO	6 out of 7	12.4799	downregulated	2	1.07888	0.34	upregulated	2	2.36916	0.0936	downregulated	4	4.17137	0.0154	downregulated	4	4.97216	0.0069	upregulated	2	0.248555	0.7799	upregulated	2	1.39424	0.248	upregulated	4	2.98385	0.0506
regulation of NIK/NF-kappaB signaling	GO	5 out of 7	12.4668	upregulated	4	1.66439	0.1893	upregulated	5	4.83869	0.0079	downregulated	10	3.57049	0.0281	downregulated	9	6.234	0.002	upregulated	7	0.51029	0.6003	upregulated	6	3.49892	0.0302	upregulated	11	5.15622	0.0058
skeletal muscle cell differentiation	GO	5 out of 7	12.4572	upregulated	4	6.54873	0.0014					downregulated	4	1.94242	0.1434	downregulated	3	3.07761	0.0461	upregulated	4	3.25039	0.0388	upregulated	6	5.60102	0.0037	upregulated	6	5.13445	0.0059
ERBB signaling pathway	GO	6 out of 7	12.45	downregulated	4	1.70301	0.1821	upregulated	2	1.09387	0.3349	downregulated	6	3.89073	0.0204	downregulated	6	2.00662	0.1344	upregulated	6	1.40569	0.2452	upregulated	6	1.9267	0.1456	upregulated	9	2.61107	0.0735
hydrolase activity, hydrolyzing N-glycosyl compounds	GO	4 out of 7	12.4434					upregulated	1	1.56838	0.2084	downregulated	2	3.05445	0.0471	downregulated	3	3.96367	0.019					upregulated	2	2.97657	0.051	upregulated	4	4.01711	0.018
cell volume homeostasis	GO	4 out of 7	12.4031	downregulated	1	1.88014	0.1526					downregulated	3	3.51437	0.0298	downregulated	3	3.31239	0.0364	upregulated	3	3.69615	0.0248	upregulated	2	3.2149	0.0402	upregulated	1	2.88346	0.0559
negative regulation of oxidative stress-induced intrinsic apoptotic signaling pathway	GO	3 out of 7	12.3479	upregulated	3	3.47557	0.0309					upregulated	1	1.09659	0.334					upregulated	4	7.04659	0.0009	upregulated	2	4.35731	0.0128	upregulated	2	5.51616	0.004
apical part of cell	GO	4 out of 7	12.3272	downregulated	11	2.79678	0.061	downregulated	7	1.76223	0.1717	downregulated	28	9.88595	5.1e-05	downregulated	16	5.39433	0.0045	upregulated	18	1.52277	0.2181	downregulated	42	4.93723	0.0072	downregulated	35	2.57482	0.0762
microtubule organizing center organization	GO	5 out of 7	12.2985	upregulated	3	0.99367	0.3702	upregulated	8	5.93368	0.0026	downregulated	12	5.36459	0.0047	downregulated	7	4.55626	0.0105	upregulated	11	2.39225	0.0914	upregulated	6	4.87661	0.0076	upregulated	10	2.03615	0.1305
inclusion body	GO	6 out of 7	12.2935	downregulated	3	1.73334	0.1767	downregulated	2	0.679186	0.507	downregulated	6	1.87617	0.1532	downregulated	2	0.280273	0.7556	upregulated	7	7.76283	0.0004	upregulated	7	5.04156	0.0065	downregulated	11	5.07982	0.0062
transcriptional repressor activity, RNA polymerase II distal enhancer sequence-specific binding	GO	5 out of 7	12.2532					downregulated	1	4.71801	0.0089	upregulated	2	3.82248	0.0219	downregulated	1	1.62263	0.1974	upregulated	2	2.46001	0.0854	upregulated	2	3.91429	0.02	upregulated	1	3.36075	0.0347
basal part of cell	GO	4 out of 7	12.2434	downregulated	1	0.506674	0.6025	upregulated	3	5.6884	0.0034	downregulated	10	11.5269	9.9e-06	downregulated	6	5.14787	0.0058	downregulated	6	0.979991	0.3753	downregulated	8	1.83279	0.16	upregulated	8	3.56312	0.0284
response to fungus	GO	4 out of 7	12.2071	upregulated	1	0.459693	0.6315	upregulated	2	2.84324	0.0582	downregulated	6	7.11469	0.0008	downregulated	3	5.16714	0.0057	upregulated	1	0.963948	0.3814	downregulated	1	0.208514	0.8118	upregulated	2	2.47273	0.0844
response to heat	GO	4 out of 7	12.2065	upregulated	8	3.37471	0.0342	upregulated	5	2.48225	0.0836	upregulated	3	1.13367	0.3219	downregulated	4	1.16463	0.312	upregulated	11	7.53591	0.0005	upregulated	8	5.67294	0.0034	upregulated	6	4.8237	0.008
endoplasmic reticulum unfolded protein response	GO	5 out of 7	12.1968	downregulated	2	3.25963	0.0384	upregulated	5	1.19545	0.3026	upregulated	5	2.20809	0.1099	downregulated	3	0.706283	0.4935	upregulated	12	4.65135	0.0095	upregulated	6	2.99119	0.0502	upregulated	13	3.99183	0.0185
RNA polymerase II core promoter sequence-specific DNA binding	GO	4 out of 7	12.1779					upregulated	1	0.838384	0.4324	downregulated	1	1.64113	0.1938	downregulated	3	3.52794	0.0294	upregulated	1	1.25884	0.284	upregulated	1	1.52698	0.2172	upregulated	5	6.7025	0.0012
RNA phosphodiester bond hydrolysis	GO	5 out of 7	12.1375	upregulated	8	1.92231	0.1463	upregulated	15	13.1295	2e-06	downregulated	14	6.90587	0.001	downregulated	11	6.82179	0.0011	upregulated	14	2.06661	0.1266	upregulated	5	3.81829	0.022	upregulated	19	7.57672	0.0005
tissue regeneration	GO	5 out of 7	12.1318	downregulated	1	0.390984	0.6764	upregulated	1	0.329439	0.7193	downregulated	5	3.89697	0.0203	downregulated	2	3.6714	0.0254	upregulated	6	3.20989	0.0404	downregulated	2	3.11157	0.0445	upregulated	6	4.40359	0.0122
positive regulation of tumor necrosis factor secretion	GO	4 out of 7	12.114	downregulated	1	1.75978	0.1721					downregulated	3	5.94428	0.0026	downregulated	2	4.50518	0.0111					upregulated	1	0.862732	0.422	downregulated	1	0.957957	0.3837
positive regulation of transcription regulatory region DNA binding	GO	6 out of 7	12.0961	downregulated	1	1.50748	0.2215	upregulated	1	1.60449	0.201	downregulated	2	4.35572	0.0128	downregulated	2	3.8103	0.0221	upregulated	3	1.61078	0.1997	upregulated	1	0.578702	0.5606	upregulated	3	1.8376	0.1592
negative regulation of gene expression, epigenetic	GO	5 out of 7	11.9468	upregulated	3	1.17787	0.3079	upregulated	7	6.44539	0.0016	downregulated	7	2.23502	0.107	downregulated	4	1.79198	0.1666	upregulated	15	6.72944	0.0012	upregulated	6	3.31666	0.0363	upregulated	10	5.49696	0.0041
cellular ketone metabolic process	GO	4 out of 7	11.9081	downregulated	2	0.894529	0.4088	upregulated	1	0.83041	0.4359	downregulated	4	0.976513	0.3766	downregulated	6	7.09683	0.0008	upregulated	6	7.97014	0.0003	downregulated	7	1.22501	0.2938	downregulated	9	2.97444	0.0511
negative regulation of cell cycle G2/M phase transition	GO	4 out of 7	11.8787	upregulated	3	0.388194	0.6783	upregulated	4	1.49962	0.2232	downregulated	7	5.41907	0.0044	downregulated	6	4.58284	0.0102	upregulated	9	3.55606	0.0286	upregulated	5	1.12193	0.3256	upregulated	4	0.20853	0.8118
cell division	GO	4 out of 7	11.8573	upregulated	32	3.34462	0.0353	upregulated	36	13.4795	1.4e-06	downregulated	54	12.5853	3.4e-06	downregulated	26	3.62799	0.0266	upregulated	63	10.1579	3.9e-05	downregulated	59	2.62526	0.0724	upregulated	42	4.93536	0.0072
clathrin adaptor activity	GO	4 out of 7	11.774	downregulated	2	3.90665	0.0201	downregulated	1	1.66351	0.1895	downregulated	3	5.86073	0.0028									downregulated	4	5.63738	0.0036	upregulated	3	5.98048	0.0025
endocytic adaptor activity	GO	4 out of 7	11.774	downregulated	2	3.90665	0.0201	downregulated	1	1.66351	0.1895	downregulated	3	5.86073	0.0028									downregulated	4	5.63738	0.0036	upregulated	3	5.98048	0.0025
phospholipid transport	GO	4 out of 7	11.7411	downregulated	2	0.56792	0.5667	upregulated	4	2.74759	0.0641	downregulated	7	4.52153	0.0109	downregulated	6	5.14327	0.0058	upregulated	4	2.68079	0.0685	upregulated	4	4.256	0.0142	upregulated	6	2.58989	0.075
cerebellar Purkinje cell layer morphogenesis	GO	4 out of 7	11.7039									downregulated	3	4.23495	0.0145					upregulated	3	2.81228	0.0601	upregulated	2	2.29487	0.1008	upregulated	2	2.36176	0.0943
presynaptic membrane organization	GO	4 out of 7	11.6606	upregulated	1	1.28865	0.2756					downregulated	3	7.02727	0.0009	upregulated	1	3.72436	0.0241	upregulated	1	1.75044	0.1737	upregulated	2	3.3187	0.0362	upregulated	3	4.57721	0.0103
defense response to fungus	GO	4 out of 7	11.6579					upregulated	1	0.748987	0.4728	downregulated	3	6.84681	0.0011	downregulated	1	1.40128	0.2463	upregulated	1	1.2949	0.2739					upregulated	2	2.86394	0.057
regulation of stem cell population maintenance	GO	6 out of 7	11.6505	upregulated	2	0.855262	0.4252	downregulated	2	1.96189	0.1406	downregulated	4	1.20552	0.2995	downregulated	3	2.14127	0.1175	upregulated	5	4.51259	0.011	upregulated	2	0.547691	0.5783	upregulated	3	2.13679	0.118
hormone metabolic process	GO	4 out of 7	11.6501	upregulated	3	1.38706	0.2498	upregulated	2	0.925225	0.3964	downregulated	9	3.39497	0.0335	downregulated	10	4.92484	0.0073	upregulated	12	5.20082	0.0055	downregulated	19	2.19294	0.1116	upregulated	9	2.63465	0.0717
transcriptional repressor complex	GO	3 out of 7	11.6224	upregulated	6	1.90005	0.1496	downregulated	2	2.61015	0.0735	upregulated	3	0.979915	0.3753	downregulated	2	0.516411	0.5967	upregulated	18	9.82767	5.4e-05	downregulated	10	1.39836	0.247	upregulated	11	5.55661	0.0039
regulation of oxidative stress-induced intrinsic apoptotic signaling pathway	GO	3 out of 7	11.5951	upregulated	3	2.16271	0.115					upregulated	1	0.684074	0.5046					upregulated	4	5.77435	0.0031	upregulated	4	3.7562	0.0234	upregulated	3	4.91137	0.0074
establishment of cell polarity	GO	4 out of 7	11.5865	upregulated	5	2.65315	0.0704	downregulated	3	2.86664	0.0569	downregulated	15	7.21225	0.0007	downregulated	9	4.90094	0.0074	downregulated	9	2.5106	0.0812	downregulated	18	4.5325	0.0108	upregulated	13	6.30287	0.0018
protein deacetylase activity	GO	4 out of 7	11.5812	upregulated	3	2.37522	0.093	upregulated	2	1.68019	0.1863	downregulated	3	0.37496	0.6873	upregulated	1	1.78614	0.1676	upregulated	12	7.74252	0.0004	upregulated	6	3.63939	0.0263	upregulated	10	5.66591	0.0035
regulation of protein localization to nucleus	GO	6 out of 7	11.5268	downregulated	4	1.66018	0.1901	downregulated	1	3.57653	0.028	downregulated	6	1.13581	0.3212	downregulated	5	1.21787	0.2959	upregulated	11	2.07896	0.1251	downregulated	8	1.13351	0.3219	upregulated	11	2.99091	0.0502
protein transport along microtubule	GO	4 out of 7	11.4984	upregulated	1	4.25155	0.0142	downregulated	1	1.82497	0.1612									upregulated	1	3.47803	0.0309	upregulated	2	4.64349	0.0096	upregulated	2	5.80344	0.003
regulation of neutrophil migration	GO	3 out of 7	11.4531					upregulated	1	0.86054	0.4229	downregulated	6	7.20132	0.0007	downregulated	5	5.89694	0.0027	downregulated	2	0.567263	0.5671	upregulated	1	0.89558	0.4084	downregulated	3	1.11296	0.3286
response to virus	GO	6 out of 7	11.3897	downregulated	10	2.62775	0.0722	upregulated	17	13.4752	1.4e-06	downregulated	18	2.54911	0.0782	downregulated	14	6.76244	0.0012	upregulated	27	7.83873	0.0004	upregulated	12	1.74645	0.1744	upregulated	25	3.34046	0.0354
stem cell differentiation	GO	3 out of 7	11.3648	upregulated	9	2.15895	0.1154	upregulated	5	2.55874	0.0774	downregulated	21	18.8438	6.5e-09	downregulated	4	0.511967	0.5993	upregulated	18	2.691	0.0678	downregulated	15	3.42073	0.0327	downregulated	14	2.54357	0.0786
regulation of lamellipodium morphogenesis	GO	5 out of 7	11.3349	downregulated	2	2.87471	0.0564					downregulated	3	3.04182	0.0477	downregulated	2	4.5381	0.0107	downregulated	1	2.00722	0.1344	upregulated	1	1.55459	0.2113	upregulated	2	1.33291	0.2637
regulation of hydrogen peroxide-induced cell death	GO	6 out of 7	11.3341	downregulated	2	2.05066	0.1287	upregulated	2	4.6313	0.0097	downregulated	4	4.23203	0.0145	downregulated	1	2.15803	0.1156	upregulated	3	3.22094	0.0399	upregulated	2	2.64332	0.0711	upregulated	4	1.66039	0.1901
neuronal stem cell population maintenance	GO	5 out of 7	11.3019	downregulated	2	1.70671	0.1815	upregulated	1	0.429701	0.6507	downregulated	2	1.12785	0.3237	upregulated	1	1.63214	0.1955	upregulated	4	2.19766	0.1111	upregulated	3	2.83514	0.0587	upregulated	7	5.4964	0.0041
positive regulation of muscle tissue development	GO	6 out of 7	11.2755	upregulated	5	3.67547	0.0253	downregulated	1	0.742934	0.4757	downregulated	6	5.4043	0.0045	downregulated	2	0.98662	0.3728	upregulated	6	1.2821	0.2775	upregulated	7	3.46573	0.0313	upregulated	6	3.0693	0.0465
negative regulation of extrinsic apoptotic signaling pathway	GO	4 out of 7	11.2714	upregulated	3	1.88	0.1526	upregulated	7	7.32468	0.0007	upregulated	4	2.06219	0.1272	downregulated	7	2.18776	0.1122	upregulated	14	7.22409	0.0007	upregulated	11	5.99609	0.0025	upregulated	13	7.13038	0.0008
basal plasma membrane	GO	5 out of 7	11.2299	downregulated	1	0.799626	0.4495	upregulated	2	6.09359	0.0023	downregulated	6	9.00995	0.0001	downregulated	4	4.81244	0.0081	upregulated	1	1.16413	0.3122	downregulated	6	2.14598	0.117	upregulated	6	3.68337	0.0251
regulation of extrinsic apoptotic signaling pathway	GO	4 out of 7	11.2089	upregulated	6	1.18027	0.3072	upregulated	9	8.95251	0.0001	upregulated	5	1.30819	0.2703	downregulated	10	2.13265	0.1185	upregulated	20	6.27865	0.0019	upregulated	16	7.71771	0.0004	upregulated	23	6.5209	0.0015
regulation of cellular response to oxidative stress	GO	6 out of 7	11.2008	downregulated	5	3.08298	0.0458	upregulated	4	6.88209	0.001	downregulated	5	2.52191	0.0803	downregulated	2	1.26165	0.2832	upregulated	8	4.40782	0.0122	upregulated	6	2.79374	0.0612	upregulated	9	4.01481	0.018
regulation of establishment of cell polarity	GO	4 out of 7	11.1891	downregulated	1	1.43542	0.238					downregulated	3	1.7314	0.177					upregulated	6	4.10177	0.0165	downregulated	2	0.266647	0.7659	upregulated	5	4.18713	0.0152
positive regulation of cold-induced thermogenesis	GO	4 out of 7	11.1782	downregulated	1	2.28362	0.1019	upregulated	5	3.32606	0.0359	upregulated	5	3.22706	0.0397	downregulated	2	1.68723	0.185	upregulated	7	3.96433	0.019	upregulated	4	2.7008	0.0672	upregulated	14	9.79616	5.6e-05
structural constituent of myelin sheath	GO	4 out of 7	11.1744	downregulated	2	5.99192	0.0025					downregulated	4	7.60662	0.0005					downregulated	3	5.78431	0.0031	upregulated	2	2.43737	0.0874	upregulated	1	0.922768	0.3974
response to ketone	GO	4 out of 7	11.1429	downregulated	4	4.93239	0.0072	upregulated	8	3.47385	0.031	downregulated	11	3.18543	0.0414	downregulated	12	5.28818	0.0051	downregulated	18	6.56291	0.0014	downregulated	25	4.69097	0.0092	upregulated	19	7.77369	0.0004
maintenance of location in cell	GO	5 out of 7	11.1145	upregulated	5	2.92391	0.0537	upregulated	8	7.11867	0.0008	downregulated	13	5.67244	0.0034	downregulated	6	5.79076	0.0031	upregulated	15	4.33031	0.0132	upregulated	3	1.03662	0.3547	upregulated	14	4.32691	0.0132
positive regulation of NIK/NF-kappaB signaling	GO	5 out of 7	11.0972	upregulated	4	2.14307	0.1173	upregulated	3	5.57742	0.0038	downregulated	8	4.25528	0.0142	downregulated	8	7.44915	0.0006	upregulated	5	0.712541	0.4904	upregulated	4	3.60956	0.0271	upregulated	5	2.79113	0.0614
mediator complex	GO	4 out of 7	11.0646	upregulated	1	0.254801	0.7751	upregulated	2	2.16369	0.1149	downregulated	5	3.91221	0.02	downregulated	3	2.5817	0.0756	upregulated	7	4.6432	0.0096	downregulated	6	1.09599	0.3342	upregulated	4	1.27824	0.2785
dendritic cell differentiation	GO	3 out of 7	11.0641	upregulated	1	1.29536	0.2738	upregulated	1	0.636653	0.5291	downregulated	6	9.18136	0.0001	downregulated	3	4.63861	0.0097	downregulated	2	1.06117	0.3461	upregulated	1	0.237309	0.7887
cell-cell junction organization	GO	5 out of 7	11.0511	upregulated	7	5.60522	0.0037	downregulated	1	3.47627	0.0309	downregulated	12	5.03191	0.0065	downregulated	3	1.49585	0.2241	downregulated	11	5.23372	0.0053	upregulated	14	5.50031	0.0041	upregulated	12	6.38575	0.0017
protein K11-linked deubiquitination	GO	6 out of 7	11.0475	downregulated	1	2.73308	0.065	upregulated	1	1.09176	0.3356	downregulated	1	2.00483	0.1347	downregulated	1	2.22031	0.1086	upregulated	2	2.57865	0.0759	upregulated	1	1.09201	0.3355	upregulated	1	1.51038	0.2208
positive regulation of proteasomal protein catabolic process	GO	4 out of 7	11.0278	upregulated	7	1.86947	0.1542	upregulated	6	2.65153	0.0705	downregulated	8	2.28251	0.102	downregulated	4	0.615762	0.5402	upregulated	11	7.43003	0.0006	upregulated	8	5.02028	0.0066	upregulated	9	5.22051	0.0054
regulation of binding	GO	5 out of 7	10.9755	downregulated	8	2.02254	0.1323	downregulated	5	3.61193	0.027	downregulated	21	1.48397	0.2267	upregulated	7	3.32468	0.036	upregulated	39	2.48598	0.0832	downregulated	38	1.01214	0.3634	upregulated	40	5.70792	0.0033
regulation of developmental pigmentation	GO	5 out of 7	10.9713	downregulated	2	2.36135	0.0943					downregulated	2	2.36935	0.0935					upregulated	2	3.26184	0.0383	upregulated	2	1.60849	0.2002	upregulated	2	1.37023	0.254
molting cycle	GO	5 out of 7	10.939	upregulated	3	1.11067	0.3293	downregulated	2	3.13652	0.0434	downregulated	9	4.19823	0.015	downregulated	6	2.87181	0.0566	upregulated	7	2.61851	0.0729	downregulated	7	3.06603	0.0466	upregulated	8	2.29063	0.1012
hair cycle	GO	5 out of 7	10.939	upregulated	3	1.11067	0.3293	downregulated	2	3.13652	0.0434	downregulated	9	4.19823	0.015	downregulated	6	2.87181	0.0566	upregulated	7	2.61851	0.0729	downregulated	7	3.06603	0.0466	upregulated	8	2.29063	0.1012
inflammasome complex	GO	4 out of 7	10.9353	downregulated	1	1.53335	0.2158					downregulated	2	1.94008	0.1437	downregulated	2	3.90407	0.0202	upregulated	2	3.5578	0.0285
regulation of vascular endothelial growth factor signaling pathway	GO	4 out of 7	10.8965									downregulated	2	4.24305	0.0144					upregulated	2	2.16307	0.115	upregulated	2	1.83287	0.16	upregulated	3	2.65745	0.0701
regulation of sprouting angiogenesis	GO	4 out of 7	10.8773	downregulated	5	6.65067	0.0013	upregulated	1	0.0908984	0.9131	downregulated	6	3.59397	0.0275	downregulated	3	2.4924	0.0827	downregulated	5	4.15692	0.0157	downregulated	2	2.14674	0.1169	upregulated	11	4.53484	0.0107
cell-cell recognition	GO	6 out of 7	10.8655	downregulated	3	2.00187	0.1351	upregulated	1	1.76453	0.1713	downregulated	3	2.64535	0.071	downregulated	1	2.72111	0.0658	upregulated	4	1.21947	0.2954	upregulated	4	2.35612	0.0948	upregulated	4	1.68611	0.1852
negative regulation of chromosome organization	GO	5 out of 7	10.8564	upregulated	11	5.07564	0.0062	upregulated	6	2.63209	0.0719	downregulated	8	1.15026	0.3166	downregulated	7	2.52493	0.0801	upregulated	22	10.4173	3e-05	upregulated	8	2.54276	0.0786	upregulated	9	1.92885	0.1453
phagosome maturation	GO	4 out of 7	10.8383	upregulated	1	1.37858	0.2519					upregulated	1	2.90874	0.0545	downregulated	3	3.91336	0.02	upregulated	1	4.13367	0.016	upregulated	1	3.7071	0.0245	upregulated	2	3.37144	0.0343
regulation of epidermis development	GO	6 out of 7	10.8198	downregulated	2	2.46379	0.0851	upregulated	2	1.22491	0.2938	downregulated	7	0.894823	0.4087	downregulated	3	0.58012	0.5598	upregulated	8	0.829331	0.4363	upregulated	8	3.58681	0.0277	upregulated	9	3.68981	0.025
ammonium transmembrane transport	GO	4 out of 7	10.8072	downregulated	2	3.5459	0.0288	downregulated	1	1.84661	0.1578	downregulated	2	4.18521	0.0152	downregulated	3	5.78599	0.0031	downregulated	3	4.55647	0.0105	downregulated	2	4.74498	0.0087	downregulated	2	3.37154	0.0343
positive regulation of chromosome separation	GO	4 out of 7	10.7626									downregulated	3	5.11383	0.006	downregulated	3	4.33083	0.0132	upregulated	1	0.600566	0.5485	downregulated	1	0.177261	0.8376	upregulated	1	0.894639	0.4088
positive regulation of cyclin-dependent protein kinase activity	GO	5 out of 7	10.7356					downregulated	1	1.28394	0.2769	upregulated	2	2.71006	0.0665	downregulated	2	1.21247	0.2975	upregulated	4	2.09932	0.1225	upregulated	3	3.48079	0.0308	upregulated	6	5.36918	0.0047
cyclin-dependent protein kinase activity	GO	4 out of 7	10.734	upregulated	4	1.72472	0.1782	downregulated	3	5.55838	0.0039	downregulated	4	3.02085	0.0488	downregulated	1	0.388608	0.678	downregulated	3	2.69245	0.0677	downregulated	3	1.23979	0.2894	upregulated	7	7.4231	0.0006
regulation of cellular senescence	GO	5 out of 7	10.73	upregulated	2	1.25671	0.2846	upregulated	3	2.45911	0.0855	downregulated	4	1.71808	0.1794	downregulated	2	0.863967	0.4215	upregulated	10	6.80339	0.0011	upregulated	4	1.74816	0.1741	upregulated	4	3.31217	0.0364
vitamin transport	GO	5 out of 7	10.7246	upregulated	1	1.41913	0.2419	downregulated	1	0.764691	0.4655	downregulated	2	4.14588	0.0158	upregulated	1	1.73433	0.1765	upregulated	6	3.1604	0.0424	upregulated	2	3.17507	0.0418	upregulated	1	2.63202	0.0719
RNA localization	GO	1 out of 7	10.7002	downregulated	3	0.25203	0.7772	upregulated	10	2.23661	0.1068	downregulated	21	6.24716	0.0019	downregulated	16	8.39439	0.0002	upregulated	30	10.7002	2.3e-05	downregulated	17	0.857357	0.4243	upregulated	23	4.50675	0.011
positive regulation of cardiac muscle cell differentiation	GO	4 out of 7	10.6878	upregulated	2	4.21007	0.0148					downregulated	2	3.98046	0.0187	downregulated	2	3.12591	0.0439	downregulated	1	1.03785	0.3542	upregulated	2	4.95789	0.007	upregulated	1	3.87144	0.0208
regulation of telomere maintenance via telomere lengthening	GO	5 out of 7	10.685	upregulated	5	3.01877	0.0489	downregulated	1	3.15746	0.0425	downregulated	4	2.33061	0.0972	downregulated	4	3.43741	0.0321	upregulated	10	5.85292	0.0029	upregulated	3	1.07958	0.3397	downregulated	6	2.15423	0.116
interleukin-12-mediated signaling pathway	GO	5 out of 7	10.6665	upregulated	3	2.32264	0.098	downregulated	1	3.69316	0.0249	downregulated	7	3.15215	0.0428	downregulated	4	4.6157	0.0099	upregulated	4	0.838981	0.4322	downregulated	5	2.669	0.0693	upregulated	5	3.35819	0.0348
gastrulation	GO	3 out of 7	10.6573	downregulated	4	3.02487	0.0486	upregulated	1	0.0729285	0.9297	downregulated	10	5.24873	0.0053	downregulated	6	5.19815	0.0055	downregulated	9	1.25878	0.284	downregulated	15	0.696043	0.4986	downregulated	11	0.786716	0.4553
transcriptional activator activity, RNA polymerase II proximal promoter sequence-specific DNA binding	GO	5 out of 7	10.6517	upregulated	11	3.05386	0.0472	downregulated	2	0.849023	0.4278	downregulated	18	1.66553	0.1891	downregulated	10	1.16872	0.3108	upregulated	36	8.47435	0.0002	downregulated	24	3.48022	0.0308	upregulated	28	5.0282	0.0066
male sex determination	GO	5 out of 7	10.6323									downregulated	1	1.89556	0.1502	downregulated	1	1.75044	0.1737	upregulated	2	2.80427	0.0606	upregulated	1	1.55885	0.2104	upregulated	2	2.62319	0.0726
cyclin-dependent protein serine/threonine kinase regulator activity	GO	5 out of 7	10.6037	downregulated	1	0.748042	0.4733	upregulated	3	4.92517	0.0073	upregulated	3	2.72832	0.0653	downregulated	1	1.62845	0.1962	upregulated	8	6.49929	0.0015	upregulated	2	0.935709	0.3923	upregulated	7	5.71741	0.0033
transcriptional activator activity, RNA polymerase II transcription regulatory region sequence-specific DNA binding	GO	4 out of 7	10.6009	upregulated	14	2.38823	0.0918	downregulated	4	0.588054	0.5554	upregulated	8	3.20145	0.0407	downregulated	20	1.8459	0.1579	upregulated	57	10.5521	2.6e-05	downregulated	27	3.52835	0.0294	upregulated	42	4.34461	0.013
response to hepatocyte growth factor	GO	5 out of 7	10.5157	downregulated	1	2.28877	0.1014	upregulated	1	2.15853	0.1155	downregulated	4	5.69823	0.0034	downregulated	1	1.50711	0.2215	upregulated	2	0.816955	0.4418	upregulated	3	2.36319	0.0941	downregulated	1	1.50783	0.2214
positive regulation of plasma membrane bounded cell projection assembly	GO	4 out of 7	10.5032	upregulated	4	2.76893	0.0627	upregulated	3	5.06708	0.0063	downregulated	13	5.62531	0.0036	downregulated	9	7.55119	0.0005	upregulated	13	5.59994	0.0037	downregulated	16	6.1412	0.0022	upregulated	11	5.70398	0.0033
negative regulation of ubiquitin-dependent protein catabolic process	GO	3 out of 7	10.4891	downregulated	1	2.55542	0.0777					downregulated	4	2.21147	0.1095	upregulated	1	1.98163	0.1378	upregulated	5	1.26497	0.2822	upregulated	4	1.64986	0.1921	upregulated	8	7.57426	0.0005
regulation of transcription regulatory region DNA binding	GO	6 out of 7	10.4585	downregulated	1	0.806199	0.4466	upregulated	2	2.65005	0.0706	downregulated	3	3.50452	0.0301	downregulated	4	2.96549	0.0515	upregulated	7	3.06936	0.0465	upregulated	3	0.886575	0.4121	upregulated	5	1.87641	0.1531
endolysosome	GO	3 out of 7	10.4555					upregulated	1	3.38957	0.0337	downregulated	2	2.76842	0.0628	downregulated	6	14.5264	4.9e-07	upregulated	1	1.00561	0.3658	downregulated	4	3.40104	0.0333	downregulated	2	1.05428	0.3484
positive regulation of CD4-positive, alpha-beta T cell activation	GO	5 out of 7	10.4396	downregulated	1	0.76584	0.4649					downregulated	5	4.87139	0.0077	downregulated	2	3.36333	0.0346					upregulated	2	0.750068	0.4723	upregulated	2	0.688938	0.5021
cardiac muscle cell development	GO	5 out of 7	10.3904	downregulated	3	2.61831	0.0729	upregulated	3	1.51759	0.2192	downregulated	4	4.37894	0.0125	downregulated	2	3.47202	0.0311	upregulated	3	0.814468	0.4429	upregulated	4	2.28415	0.1019	downregulated	6	1.65991	0.1902
tertiary granule lumen	GO	4 out of 7	10.3477	downregulated	1	2.60215	0.0741	upregulated	1	0.878843	0.4153	downregulated	5	5.26302	0.0052	downregulated	4	6.36937	0.0017	downregulated	4	2.72644	0.0655	downregulated	6	1.64858	0.1923	upregulated	3	1.36706	0.2549
protein transmembrane transporter activity	GO	2 out of 7	10.3374	upregulated	1	0.518862	0.5952					downregulated	1	6.50167	0.0015					downregulated	2	3.30327	0.0368	downregulated	7	6.64057	0.0013	upregulated	4	7.65785	0.0005
adaptive thermogenesis	GO	4 out of 7	10.2956	downregulated	1	1.13213	0.3223					downregulated	5	5.65719	0.0035					upregulated	2	3.16755	0.0421					upregulated	1	0.338698	0.7127
establishment or maintenance of cell polarity	GO	3 out of 7	10.2814	upregulated	7	1.95547	0.1415	downregulated	4	2.31466	0.0988	downregulated	26	12.4091	4.1e-06	downregulated	14	5.39172	0.0046	downregulated	16	7.8786	0.0004	downregulated	30	8.15201	0.0003	upregulated	22	9.32867	8.9e-05
chromatin assembly	GO	5 out of 7	10.2418	upregulated	9	3.61304	0.027	upregulated	12	10.3789	3.1e-05	downregulated	7	1.06644	0.3442	downregulated	5	1.70087	0.1825	upregulated	17	6.90298	0.001	upregulated	8	7.89288	0.0004	upregulated	14	6.67061	0.0013
monosaccharide binding	GO	4 out of 7	10.1789	downregulated	2	1.07472	0.3414	upregulated	4	2.12577	0.1193	downregulated	4	0.886466	0.4121	downregulated	4	2.24132	0.1063	upregulated	13	9.28676	9.3e-05	downregulated	8	1.18465	0.3059	upregulated	6	1.83824	0.1591
regulation of response to oxidative stress	GO	6 out of 7	10.1294	downregulated	5	2.59392	0.0747	upregulated	4	6.4114	0.0016	downregulated	5	2.40057	0.0907	downregulated	2	1.14241	0.319	upregulated	9	3.93502	0.0195	upregulated	6	2.66509	0.0696	upregulated	10	3.80376	0.0223
cell-matrix adhesion	GO	3 out of 7	10.125	upregulated	4	1.03948	0.3536	upregulated	3	1.4364	0.2378	downregulated	10	2.61417	0.0732	downregulated	7	7.09324	0.0008	upregulated	14	2.89347	0.0554	upregulated	12	4.6372	0.0097	downregulated	10	3.64919	0.026
transferase activity, transferring acyl groups other than amino-acyl groups	GO	4 out of 7	10.117	upregulated	10	0.801356	0.4487	upregulated	12	3.3302	0.0358	downregulated	13	3.16242	0.0423	downregulated	9	2.00156	0.1351	upregulated	31	8.65426	0.0002	downregulated	26	1.64605	0.1928	upregulated	18	2.07632	0.1254
regulation of bicellular tight junction assembly	GO	5 out of 7	10.1027					upregulated	1	0.629185	0.533	downregulated	3	3.76148	0.0232	downregulated	1	1.02602	0.3584	upregulated	4	1.78877	0.1672	upregulated	2	2.56809	0.0767	upregulated	3	1.5875	0.2044
regulation of defense response to bacterium	GO	4 out of 7	10.0975									upregulated	1	4.7634	0.0085	downregulated	1	3.6731	0.0254	upregulated	1	0.676051	0.5086	upregulated	3	3.76463	0.0232	upregulated	2	1.98372	0.1376
female sex differentiation	GO	5 out of 7	10.0574	downregulated	5	2.27889	0.1024	upregulated	2	1.45551	0.2333	downregulated	6	3.23075	0.0395	downregulated	4	1.32629	0.2655	downregulated	6	4.13218	0.016	upregulated	8	3.88776	0.0205	upregulated	10	4.9214	0.0073
positive regulation of interleukin-8 secretion	GO	4 out of 7	9.96625					upregulated	1	2.79718	0.061	downregulated	2	2.06073	0.1274	downregulated	3	9.19459	0.0001					upregulated	1	0.825234	0.4381	upregulated	1	0.682883	0.5052
complement activation	GO	4 out of 7	9.96599	downregulated	3	2.1927	0.1116					downregulated	3	1.04207	0.3527	downregulated	3	6.21647	0.002	upregulated	1	0.514759	0.5976	upregulated	4	3.56064	0.0284	upregulated	6	7.77872	0.0004
response to ischemia	GO	6 out of 7	9.96369	downregulated	1	0.471512	0.6241	upregulated	2	5.60177	0.0037	downregulated	1	2.04606	0.1292	downregulated	1	1.4191	0.2419	upregulated	5	5.92201	0.0027	upregulated	2	2.8353	0.0587	upregulated	4	2.87147	0.0566
complement activation, classical pathway	GO	3 out of 7	9.94787	downregulated	3	2.62554	0.0724					downregulated	2	0.618713	0.5386	downregulated	3	6.76083	0.0012	downregulated	1	0.0572146	0.9444	upregulated	2	0.143547	0.8663	upregulated	1	2.51746	0.0807
negative regulation of anoikis	GO	4 out of 7	9.94408	downregulated	2	2.15066	0.1164	upregulated	2	3.5783	0.0279	upregulated	2	1.91299	0.1476	downregulated	1	0.522829	0.5928					upregulated	1	5.51643	0.004	upregulated	4	7.24546	0.0007
negative regulation of proteolysis involved in cellular protein catabolic process	GO	3 out of 7	9.92603	downregulated	1	2.20505	0.1102	upregulated	2	0.526919	0.5904	downregulated	4	1.30203	0.272	downregulated	5	1.69849	0.183	upregulated	9	1.8566	0.1562	upregulated	4	1.04284	0.3525	upregulated	10	7.55351	0.0005
positive regulation of neutrophil migration	GO	2 out of 7	9.91213					upregulated	1	0.976983	0.3764	downregulated	5	6.26562	0.0019	downregulated	3	6.22514	0.002	downregulated	2	0.722361	0.4856	downregulated	1	0.443893	0.6415	downregulated	2	0.435405	0.647
regulation of amyloid precursor protein catabolic process	GO	4 out of 7	9.90848	upregulated	1	0.386221	0.6796	upregulated	1	0.626748	0.5343	downregulated	3	3.24205	0.0391	downregulated	2	1.91212	0.1478	upregulated	5	2.33933	0.0964	downregulated	2	0.313401	0.731	upregulated	3	3.74135	0.0237
regulation of tumor necrosis factor secretion	GO	4 out of 7	9.82101	downregulated	1	1.34016	0.2618					downregulated	3	4.44248	0.0118	downregulated	2	3.77218	0.023					upregulated	2	1.38139	0.2512	downregulated	2	1.1152	0.3278
mitotic spindle midzone	GO	4 out of 7	9.77485	upregulated	1	1.18687	0.3052					downregulated	4	4.66393	0.0094	downregulated	2	2.28216	0.1021	upregulated	2	4.0235	0.0179	upregulated	1	1.77031	0.1703	upregulated	2	2.24533	0.1059
regulation of myoblast proliferation	GO	5 out of 7	9.7738					downregulated	1	2.75485	0.0636	downregulated	1	2.16113	0.1152	downregulated	1	2.40584	0.0902	upregulated	2	1.47539	0.2287	downregulated	1	0.413128	0.6616	upregulated	2	1.38972	0.2491
ventral spinal cord development	GO	5 out of 7	9.76949					upregulated	1	1.80114	0.1651	downregulated	3	1.39821	0.247	downregulated	1	0.239384	0.7871	upregulated	3	4.12286	0.0162	upregulated	2	2.80561	0.0605	upregulated	4	3.00457	0.0496
core promoter sequence-specific DNA binding	GO	3 out of 7	9.76202	upregulated	1	0.234643	0.7909	upregulated	1	0.40667	0.6659	upregulated	2	2.56339	0.077	downregulated	3	1.96228	0.1405	upregulated	5	1.53315	0.2159	upregulated	1	0.948437	0.3873	upregulated	8	9.4713	7.7e-05
dorsal/ventral pattern formation	GO	4 out of 7	9.73267	upregulated	1	0.0426825	0.9582	upregulated	2	0.539222	0.5832	downregulated	4	4.5747	0.0103	downregulated	3	1.7808	0.1685	downregulated	4	2.48827	0.0831	upregulated	5	3.69504	0.0248	upregulated	5	2.7523	0.0638
negative regulation of neural precursor cell proliferation	GO	5 out of 7	9.70409					upregulated	1	3.03253	0.0482	downregulated	2	2.58335	0.0755	downregulated	1	1.48926	0.2255	upregulated	2	1.20591	0.2994	upregulated	3	4.20593	0.0149	upregulated	3	3.25217	0.0387
phosphatidylinositol 3-kinase regulatory subunit binding	GO	5 out of 7	9.70206									downregulated	1	0.879127	0.4151	downregulated	2	3.61769	0.0268	upregulated	1	2.16088	0.1152	upregulated	1	1.02377	0.3592	upregulated	1	2.0206	0.1326
heme binding	GO	5 out of 7	9.68574	downregulated	5	3.09214	0.0454	upregulated	4	1.53565	0.2153	downregulated	9	4.98258	0.0069	downregulated	5	3.90902	0.0201	downregulated	7	4.50994	0.011	upregulated	5	2.09183	0.1235	upregulated	7	1.65577	0.1909
negative regulation of ATP metabolic process	GO	3 out of 7	9.67571	upregulated	2	1.43589	0.2379	downregulated	1	5.27525	0.0051	downregulated	1	0.495734	0.6091					upregulated	4	5.34062	0.0048	upregulated	4	5.10048	0.0061	upregulated	5	5.35459	0.0047
fatty acid biosynthetic process	GO	3 out of 7	9.65095	downregulated	6	6.69996	0.0012	upregulated	4	0.607512	0.5447	downregulated	10	5.30077	0.005	downregulated	7	8.06866	0.0003	downregulated	15	9.81094	5.5e-05	downregulated	17	4.72599	0.0089	upregulated	9	5.38794	0.0046
regulation of translation	GO	1 out of 7	9.6322	upregulated	15	0.545738	0.5794	upregulated	21	6.68247	0.0013	upregulated	14	2.54727	0.0783	downregulated	20	3.58786	0.0277	upregulated	48	9.6322	6.6e-05	downregulated	45	4.92092	0.0073	upregulated	42	8.5466	0.0002
positive regulation of cysteine-type endopeptidase activity involved in apoptotic signaling pathway	GO	4 out of 7	9.63185	upregulated	1	0.906817	0.4038					downregulated	3	6.15784	0.0021	downregulated	1	1.15834	0.314	upregulated	1	1.54613	0.2131	downregulated	1	0.400612	0.6699	upregulated	1	2.07698	0.1253
regulation of cellular response to drug	GO	6 out of 7	9.62251	downregulated	2	1.58603	0.2047	upregulated	2	4.4119	0.0121	downregulated	4	4.01536	0.018	downregulated	1	1.88058	0.1525	upregulated	4	2.98679	0.0504	upregulated	2	2.29423	0.1008	upregulated	4	1.27143	0.2804
peptide biosynthetic process	GO	1 out of 7	9.60068	upregulated	15	0.191373	0.8258	upregulated	18	4.95421	0.0071	upregulated	14	1.57218	0.2076	upregulated	5	1.38466	0.2504	downregulated	29	7.47539	0.0006	downregulated	50	2.54332	0.0786	upregulated	59	27.7218	9.1e-13
ceramide transporter activity	GO	4 out of 7	9.58577	upregulated	1	1.03425	0.3555					downregulated	1	2.9109	0.0544	downregulated	1	1.94767	0.1426					upregulated	1	2.36366	0.0941	upregulated	3	3.39778	0.0334
positive regulation of vascular endothelial cell proliferation	GO	6 out of 7	9.54499	downregulated	1	1.0435	0.3522	downregulated	1	1.86215	0.1553	downregulated	2	2.22702	0.1078					upregulated	4	2.66845	0.0694	upregulated	1	0.861131	0.4227	upregulated	1	0.882737	0.4136
positive regulation of protein localization to nucleus	GO	6 out of 7	9.46697	downregulated	2	1.11171	0.329	upregulated	1	0.0656498	0.9365	downregulated	4	1.0627	0.3455	downregulated	3	0.755997	0.4695	upregulated	6	1.227	0.2932	upregulated	2	0.13164	0.8767	upregulated	9	5.24357	0.0053
ncRNA transcription	GO	6 out of 7	9.46599	upregulated	3	0.193203	0.8243	downregulated	1	0.307177	0.7355	downregulated	9	2.31137	0.0991	downregulated	4	1.03716	0.3545	upregulated	12	2.75522	0.0636	upregulated	6	2.4056	0.0902	upregulated	7	0.842669	0.4306
response to angiotensin	GO	4 out of 7	9.45486					upregulated	2	2.75104	0.0639	downregulated	3	1.4214	0.2414	downregulated	3	4.35126	0.0129	downregulated	2	4.68738	0.0092	upregulated	2	4.47513	0.0114	upregulated	7	6.64549	0.0013
negative regulation of execution phase of apoptosis	GO	5 out of 7	9.45117	upregulated	1	3.10546	0.0448					downregulated	2	2.14375	0.1172	downregulated	2	3.02421	0.0486	upregulated	2	1.57818	0.2064	upregulated	1	2.89072	0.0555	upregulated	2	2.91978	0.0539
nerve growth factor signaling pathway	GO	5 out of 7	9.41052	upregulated	1	1.28865	0.2756					downregulated	1	1.00685	0.3654	downregulated	1	1.95216	0.142	upregulated	1	0.38995	0.6771	upregulated	1	3.01422	0.0491	upregulated	3	4.33598	0.0131
ERBB2 signaling pathway	GO	5 out of 7	9.3866	upregulated	2	0.66106	0.5163	upregulated	1	0.886455	0.4121	downregulated	2	5.48694	0.0041	downregulated	3	1.61653	0.1986	upregulated	2	0.627717	0.5338	upregulated	3	1.33426	0.2634	upregulated	4	1.86866	0.1543
regulation of store-operated calcium entry	GO	5 out of 7	9.37627	downregulated	1	3.44466	0.0319	upregulated	1	1.1751	0.3088	downregulated	1	2.45583	0.0858	downregulated	1	3.19596	0.0409	upregulated	1	1.46524	0.231	downregulated	2	1.08594	0.3376	upregulated	1	1.07563	0.3411
apoptotic process involved in development	GO	3 out of 7	9.36659	upregulated	1	2.67367	0.069					downregulated	2	1.47933	0.2278	downregulated	2	2.59324	0.0748	downregulated	1	3.1894	0.0412	upregulated	5	7.9677	0.0003	upregulated	5	3.47602	0.0309
amelogenesis	GO	5 out of 7	9.35106	downregulated	2	3.31063	0.0365					downregulated	2	0.676393	0.5084					upregulated	1	0.396004	0.673	upregulated	1	1.34161	0.2614	upregulated	4	3.62642	0.0266
positive regulation of STAT cascade	GO	6 out of 7	9.34995	downregulated	3	2.60165	0.0742	downregulated	1	2.68551	0.0682	upregulated	1	0.660543	0.5166	downregulated	3	0.755997	0.4695	upregulated	4	2.0928	0.1233	upregulated	2	0.502412	0.6051	upregulated	5	1.37214	0.2536
hair cycle process	GO	4 out of 7	9.33345	upregulated	3	1.4574	0.2328	downregulated	2	3.23492	0.0394	downregulated	9	5.09036	0.0062	downregulated	6	3.31526	0.0363	upregulated	7	2.87109	0.0566	downregulated	7	3.39398	0.0336	upregulated	8	2.54428	0.0785
mitotic sister chromatid cohesion	GO	4 out of 7	9.28911	downregulated	1	3.62373	0.0267	upregulated	1	2.94466	0.0526	downregulated	3	2.10368	0.122	downregulated	1	1.22709	0.2931	upregulated	4	5.27927	0.0051					upregulated	2	1.85298	0.1568
RNA polymerase II activity	GO	3 out of 7	9.2884									downregulated	1	1.78356	0.168					downregulated	1	1.37702	0.2523	upregulated	2	2.96656	0.0515	upregulated	4	5.91529	0.0027
vacuole organization	GO	2 out of 7	9.27222	upregulated	5	1.03088	0.3567	upregulated	4	0.72646	0.4836	downregulated	16	9.87863	5.1e-05	downregulated	11	4.6632	0.0094	downregulated	11	3.51227	0.0298	upregulated	6	3.99071	0.0185	upregulated	10	4.11607	0.0163
mRNA splice site selection	GO	1 out of 7	9.27159	downregulated	2	1.79124	0.1668	downregulated	1	3.66358	0.0256	downregulated	6	2.23636	0.1068					upregulated	9	9.27159	9.4e-05	downregulated	9	7.56052	0.0005	downregulated	4	3.55517	0.0286
erythrocyte maturation	GO	5 out of 7	9.26076	downregulated	1	3.88427	0.0206					downregulated	1	1.44014	0.2369	downregulated	1	2.15708	0.1157	upregulated	2	1.87668	0.1531	upregulated	1	0.960823	0.3826	downregulated	1	1.05823	0.3471
negative regulation of cilium assembly	GO	4 out of 7	9.25993	upregulated	2	3.31674	0.0363	downregulated	1	3.26862	0.0381	downregulated	4	4.56488	0.0104	downregulated	2	2.2349	0.107	upregulated	4	6.15318	0.0021	downregulated	3	3.64491	0.0261	downregulated	3	4.2058	0.0149
positive regulation of ATP biosynthetic process	GO	4 out of 7	9.21398	upregulated	2	3.18315	0.0415					downregulated	4	3.60539	0.0272	downregulated	2	2.50913	0.0813	upregulated	2	5.12302	0.006	downregulated	3	3.87643	0.0207	upregulated	3	5.03601	0.0065
stem cell population maintenance	GO	5 out of 7	9.17569	downregulated	5	1.34945	0.2594	upregulated	5	2.68242	0.0684	downregulated	12	2.4003	0.0907	downregulated	7	1.88426	0.1519	upregulated	18	5.03816	0.0065	downregulated	10	1.35523	0.2579	upregulated	13	1.18595	0.3055
regulation of cell fate specification	GO	4 out of 7	9.17412	downregulated	1	1.93909	0.1438	downregulated	1	2.16772	0.1144									upregulated	3	4.20772	0.0149	upregulated	1	1.10244	0.3321	downregulated	1	0.242844	0.7844
cellular response to platelet-derived growth factor stimulus	GO	4 out of 7	9.11838					upregulated	1	1.68599	0.1853	upregulated	1	2.98312	0.0506	downregulated	2	1.96977	0.1395	upregulated	4	4.82476	0.008	upregulated	3	3.56814	0.0282	upregulated	3	3.42481	0.0326
gland development	GO	4 out of 7	9.08396	downregulated	14	4.56983	0.0104	upregulated	8	2.74059	0.0645	downregulated	32	3.8256	0.0218	upregulated	8	4.00663	0.0182	upregulated	43	7.69118	0.0005	downregulated	44	2.0931	0.1233	upregulated	37	1.83767	0.1592
sister chromatid cohesion	GO	4 out of 7	9.07027	downregulated	1	2.73175	0.0651	upregulated	2	1.85148	0.157	downregulated	3	0.531269	0.5879	downregulated	1	0.547578	0.5783	upregulated	8	7.11115	0.0008	downregulated	2	0.0272784	0.9731	upregulated	5	1.95647	0.1414
tetrapyrrole binding	GO	5 out of 7	9.03013	downregulated	5	2.9146	0.0542	upregulated	4	1.49065	0.2252	downregulated	9	4.83863	0.0079	downregulated	6	3.71516	0.0244	downregulated	8	4.36773	0.0127	upregulated	6	1.9468	0.1427	upregulated	7	1.47334	0.2292
stem cell division	GO	4 out of 7	9.02078	upregulated	2	0.701532	0.4958	downregulated	2	4.3545	0.0128	downregulated	3	4.63723	0.0097	downregulated	3	3.33829	0.0355	upregulated	8	6.00942	0.0025	downregulated	6	5.03638	0.0065	downregulated	4	3.58076	0.0279
RNA export from nucleus	GO	1 out of 7	8.99697	downregulated	2	0.184168	0.8318	upregulated	8	2.64748	0.0708	upregulated	6	3.52958	0.0293	downregulated	10	4.90268	0.0074	upregulated	21	8.99697	0.0001	upregulated	8	1.26728	0.2816	upregulated	13	3.54711	0.0288
ceramide transport	GO	4 out of 7	8.98527	upregulated	1	0.94522	0.3886					downregulated	1	2.73409	0.065	downregulated	1	1.8433	0.1583					upregulated	1	2.19101	0.1118	upregulated	3	3.1621	0.0423
L-ascorbic acid binding	GO	5 out of 7	8.97503	downregulated	1	2.08746	0.124	upregulated	3	4.04768	0.0175	downregulated	1	1.27427	0.2796	downregulated	1	0.889479	0.4109	upregulated	6	7.75362	0.0004	upregulated	1	1.01788	0.3614	upregulated	4	3.52425	0.0295
mesoderm morphogenesis	GO	5 out of 7	8.95415	downregulated	3	2.14931	0.1166	upregulated	1	0.325663	0.722	downregulated	4	4.28155	0.0138	downregulated	2	2.46115	0.0853	upregulated	4	0.379538	0.6842	downregulated	4	0.170793	0.843	upregulated	3	0.17906	0.8361
myofibril assembly	GO	5 out of 7	8.94949	upregulated	2	2.4723	0.0844	downregulated	1	0.716317	0.4885	downregulated	5	4.37864	0.0125	downregulated	2	3.43822	0.0321	downregulated	3	1.83837	0.1591	upregulated	4	2.71771	0.066	upregulated	5	2.00926	0.1341
cytokine secretion	GO	5 out of 7	8.9146	downregulated	1	0.420996	0.6564	upregulated	1	2.86557	0.057	downregulated	4	2.53302	0.0794	downregulated	5	6.45072	0.0016	downregulated	1	0.196457	0.8216	upregulated	2	0.362686	0.6958	upregulated	4	2.20921	0.1098
animal organ formation	GO	5 out of 7	8.90117	upregulated	3	4.26052	0.0141					downregulated	4	6.20184	0.002	downregulated	1	0.805829	0.4467	upregulated	2	0.660814	0.5164	upregulated	1	3.1712	0.042	upregulated	1	2.32201	0.0981
intestinal lipid absorption	GO	3 out of 7	8.88963									downregulated	1	0.846421	0.4289	downregulated	2	4.13516	0.016	upregulated	1	3.90805	0.0201
maintenance of cell number	GO	5 out of 7	8.82496	downregulated	5	1.30008	0.2725	upregulated	5	2.61567	0.0731	downregulated	12	2.3811	0.0924	downregulated	7	1.86574	0.1548	upregulated	18	4.79555	0.0083	downregulated	10	1.31998	0.2671	upregulated	13	1.09815	0.3335
response to platelet-derived growth factor	GO	4 out of 7	8.80944					upregulated	1	1.64601	0.1928	upregulated	1	2.9378	0.053	downregulated	2	1.92671	0.1456	upregulated	4	4.67357	0.0093	upregulated	3	3.45071	0.0317	upregulated	3	3.34227	0.0354
epithelial cell apoptotic process	GO	5 out of 7	8.77428					downregulated	1	3.75757	0.0233	downregulated	4	2.01901	0.1328	downregulated	2	1.62458	0.197	downregulated	1	0.595593	0.5512	upregulated	2	1.20536	0.2996	upregulated	2	0.763357	0.4661
sperm head	GO	3 out of 7	8.77198									upregulated	1	1.74857	0.174					upregulated	1	2.19015	0.1119	upregulated	1	5.13168	0.0059	upregulated	1	3.19873	0.0408
regulation of interleukin-8 secretion	GO	5 out of 7	8.76964					upregulated	1	2.34565	0.0958	downregulated	2	1.29294	0.2745	downregulated	3	7.68067	0.0005	upregulated	1	0.558524	0.5721	upregulated	1	0.471884	0.6238	upregulated	2	1.11128	0.3291
positive regulation of double-strand break repair	GO	5 out of 7	8.74868	upregulated	1	1.35966	0.2567	upregulated	1	0.69954	0.4968	downregulated	3	1.85525	0.1564	downregulated	3	3.9578	0.0191	upregulated	4	3.65628	0.0258	upregulated	1	0.528071	0.5897	upregulated	2	0.810477	0.4446
antigen processing and presentation of endogenous antigen	GO	3 out of 7	8.64603	upregulated	1	0.721747	0.4859					downregulated	3	4.37459	0.0126	downregulated	2	4.65109	0.0096					upregulated	1	0.342104	0.7103
regulation of endothelial cell apoptotic process	GO	4 out of 7	8.59512	upregulated	2	2.41038	0.0898	downregulated	1	1.30595	0.2709	downregulated	3	1.56754	0.2086	downregulated	4	3.65201	0.0259	upregulated	4	2.88316	0.056	downregulated	1	3.64867	0.026	upregulated	6	4.48	0.0113
G-rich strand telomeric DNA binding	GO	4 out of 7	8.55042	upregulated	3	3.84764	0.0213	upregulated	1	2.75134	0.0638	downregulated	2	4.00858	0.0182	downregulated	2	3.64548	0.0261	upregulated	3	4.03349	0.0177	downregulated	2	1.01222	0.3634	upregulated	2	4.47407	0.0114
maintenance of protein location in cell	GO	5 out of 7	8.54436	upregulated	5	3.44691	0.0318	upregulated	6	6.90128	0.001	downregulated	11	5.8569	0.0029	downregulated	6	6.00848	0.0025	upregulated	13	3.9227	0.0198	upregulated	3	1.4018	0.2462	upregulated	8	1.70267	0.1822
positive regulation of interleukin-6 secretion	GO	5 out of 7	8.53185	downregulated	2	2.93813	0.053					downregulated	3	1.93692	0.1441	downregulated	1	1.74579	0.1745	downregulated	1	0.896832	0.4079	upregulated	3	2.02465	0.132	upregulated	2	0.783186	0.4569
germ cell development	GO	3 out of 7	8.51137	upregulated	10	1.13215	0.3223	downregulated	3	3.70543	0.0246	upregulated	9	3.94498	0.0194	downregulated	14	6.34017	0.0018	upregulated	19	3.54291	0.0289	upregulated	11	3.33627	0.0356	downregulated	23	2.08571	0.1242
mesenchymal cell differentiation	GO	3 out of 7	8.51089	upregulated	9	3.14018	0.0433	upregulated	2	2.54587	0.0784	downregulated	16	11.1024	1.5e-05	downregulated	10	3.33488	0.0356	upregulated	19	4.3317	0.0131	downregulated	12	1.83617	0.1594	downregulated	11	2.73585	0.0648
sterol binding	GO	5 out of 7	8.44813	downregulated	1	0.616447	0.5399	upregulated	5	4.89588	0.0075	downregulated	4	1.76015	0.172	downregulated	4	6.27906	0.0019	downregulated	1	2.17798	0.1133	upregulated	5	3.76588	0.0231	upregulated	5	3.10045	0.045
collagen-activated signaling pathway	GO	2 out of 7	8.43118									downregulated	3	5.74429	0.0032	downregulated	2	6.45423	0.0016					downregulated	1	1.52366	0.2179	downregulated	1	2.24368	0.1061
axis specification	GO	6 out of 7	8.41756	upregulated	5	2.10984	0.1213	downregulated	1	0.960665	0.3826	downregulated	5	1.94233	0.1434	downregulated	1	0.188716	0.828	upregulated	8	2.34098	0.0962	upregulated	6	2.95803	0.0519	upregulated	6	2.13668	0.118
CD8-positive, alpha-beta T cell activation	GO	4 out of 7	8.40797	upregulated	1	1.68806	0.1849					downregulated	2	2.89689	0.0552	downregulated	2	5.8698	0.0028	upregulated	2	1.36941	0.2543	downregulated	1	2.09733	0.1228	upregulated	1	2.05726	0.1278
regulation of lysosomal lumen pH	GO	3 out of 7	8.38975									downregulated	2	4.6607	0.0095									upregulated	1	2.22484	0.1081	upregulated	1	1.5042	0.2222
regulation of amyloid-beta formation	GO	4 out of 7	8.3849					upregulated	1	0.774303	0.461	downregulated	2	1.07067	0.3428	downregulated	1	0.857688	0.4241	upregulated	5	3.06687	0.0466	downregulated	1	0.289785	0.7484	upregulated	3	4.45376	0.0116
peptidase activator activity	GO	5 out of 7	8.37282	downregulated	2	1.35176	0.2588	upregulated	4	2.40964	0.0898	upregulated	2	2.93951	0.0529	downregulated	6	5.14518	0.0058	upregulated	5	2.40148	0.0906	upregulated	3	1.4934	0.2246	upregulated	4	3.33014	0.0358
positive regulation of signaling receptor activity	GO	3 out of 7	8.35918					upregulated	1	0.432523	0.6489	upregulated	3	3.5691	0.0282	upregulated	1	2.04584	0.1293	upregulated	4	4.00932	0.0181	upregulated	5	5.97495	0.0025	upregulated	3	4.42237	0.012
regulation of lipid metabolic process	GO	3 out of 7	8.30818	upregulated	10	0.879545	0.415	upregulated	17	4.51156	0.011	downregulated	26	4.38899	0.0124	downregulated	21	8.90836	0.0001	downregulated	31	4.35065	0.0129	downregulated	48	4.25497	0.0142	upregulated	41	9.00755	0.0001
cytoplasmic side of endoplasmic reticulum membrane	GO	4 out of 7	8.26227													downregulated	1	1.33827	0.2623	upregulated	2	1.68824	0.1848	upregulated	2	2.81722	0.0598	upregulated	3	2.41854	0.0891
positive regulation of ATP metabolic process	GO	4 out of 7	8.23019	upregulated	2	3.06368	0.0467					downregulated	4	3.09405	0.0453	downregulated	2	2.30249	0.1	upregulated	2	4.71767	0.0089	downregulated	3	3.45177	0.0317	upregulated	3	4.63143	0.0097
regulation of non-canonical Wnt signaling pathway	GO	4 out of 7	8.21106	downregulated	1	3.04712	0.0475					downregulated	2	1.72781	0.1777					upregulated	2	3.64875	0.026	downregulated	3	1.03114	0.3566	upregulated	2	0.818524	0.4411
transferase activity, transferring alkyl or aryl (other than methyl) groups	GO	4 out of 7	8.1735	upregulated	2	1.06753	0.3439	upregulated	4	2.80057	0.0608	downregulated	5	3.58848	0.0276	downregulated	5	5.73185	0.0032	downregulated	5	2.66005	0.0699	upregulated	3	2.44135	0.087	upregulated	5	2.93997	0.0529
regulation of actomyosin structure organization	GO	5 out of 7	8.07709	upregulated	9	7.64507	0.0005	downregulated	1	3.03116	0.0483	downregulated	9	4.15693	0.0157	downregulated	2	0.893062	0.4094	downregulated	8	2.453	0.086	upregulated	6	2.95404	0.0521	upregulated	12	7.13995	0.0008
positive regulation of response to endoplasmic reticulum stress	GO	5 out of 7	8.03464	upregulated	2	0.971216	0.3786	upregulated	3	2.42545	0.0884	downregulated	3	2.38803	0.0918	downregulated	2	0.867145	0.4201	upregulated	5	2.16986	0.1142	upregulated	3	1.98354	0.1376	upregulated	6	4.02272	0.0179
negative regulation of NIK/NF-kappaB signaling	GO	5 out of 7	8.03136	downregulated	1	0.950045	0.3867	upregulated	1	0.726799	0.4835	downregulated	1	0.29479	0.7447					upregulated	2	1.95039	0.1422	upregulated	2	2.20053	0.1107	upregulated	4	3.3624	0.0347
protein localization to vacuole	GO	3 out of 7	8.00139	upregulated	4	3.64554	0.0261	upregulated	2	2.08937	0.1238	downregulated	5	2.41576	0.0893	downregulated	8	7.3814	0.0006	upregulated	8	3.93914	0.0195	upregulated	4	3.61688	0.0269	upregulated	3	2.64892	0.0707
positive regulation of amyloid precursor protein catabolic process	GO	4 out of 7	7.97866									downregulated	1	1.81978	0.1621	downregulated	2	3.20684	0.0405	upregulated	2	2.40601	0.0902	downregulated	1	0.590962	0.5538	upregulated	1	1.13701	0.3208
RNA polymerase I activity	GO	5 out of 7	7.93396	downregulated	1	1.50241	0.2226	downregulated	2	3.82036	0.0219	downregulated	1	1.57488	0.207					downregulated	2	2.25049	0.1053	upregulated	1	1.65128	0.1918	upregulated	2	1.63552	0.1949
lymphocyte proliferation	GO	4 out of 7	7.92065	upregulated	2	2.61449	0.0732	upregulated	2	0.309906	0.7335	downregulated	4	3.94184	0.0194	downregulated	4	4.44159	0.0118	upregulated	4	2.73104	0.0652	downregulated	4	2.9425	0.0527	upregulated	6	2.67308	0.069
transferase activity, transferring acyl groups	GO	4 out of 7	7.88537	upregulated	11	0.750617	0.4721	upregulated	13	3.21039	0.0403	downregulated	15	3.19771	0.0409	downregulated	9	1.47915	0.2278	upregulated	32	7.45587	0.0006	downregulated	31	1.8775	0.153	upregulated	21	1.59114	0.2037
mononuclear cell proliferation	GO	4 out of 7	7.84369	upregulated	2	2.57351	0.0763	upregulated	2	0.293804	0.7454	downregulated	4	3.87977	0.0207	downregulated	4	4.37785	0.0126	upregulated	4	2.70558	0.0668	downregulated	4	2.86149	0.0572	upregulated	6	2.60929	0.0736
neuron fate commitment	GO	5 out of 7	7.75309	downregulated	2	0.845595	0.4293	downregulated	1	3.53305	0.0292	downregulated	7	4.26404	0.0141	downregulated	2	1.53642	0.2152	upregulated	6	3.79658	0.0224	downregulated	8	2.38886	0.0917	downregulated	6	3.83372	0.0216
basal RNA polymerase II transcription machinery binding	GO	4 out of 7	7.7134	upregulated	2	0.783675	0.4567	upregulated	1	0.260314	0.7708	downregulated	5	1.04869	0.3504	downregulated	2	0.823242	0.439	upregulated	7	5.32614	0.0049	downregulated	5	0.424365	0.6542	upregulated	5	1.98368	0.1376
microtubule end	GO	4 out of 7	7.70658									downregulated	4	3.65352	0.0259	downregulated	3	2.90005	0.055	upregulated	3	1.18936	0.3044	downregulated	3	1.70634	0.1815	upregulated	5	1.67	0.1882
IRES-dependent viral translational initiation	GO	3 out of 7	7.68154									downregulated	3	4.77413	0.0084	downregulated	2	5.08038	0.0062	upregulated	2	4.76455	0.0085	downregulated	4	4.07049	0.0171	downregulated	2	2.86704	0.0569
heterophilic cell-cell adhesion via plasma membrane cell adhesion molecules	GO	4 out of 7	7.64381	downregulated	3	2.83189	0.0589	downregulated	1	0.663068	0.5153	downregulated	4	4.79279	0.0083	downregulated	1	1.59888	0.2021	downregulated	2	2.24282	0.1062	downregulated	6	2.36033	0.0944	downregulated	7	2.51283	0.081
chemokine binding	GO	5 out of 7	7.64157	downregulated	1	1.50998	0.2209	upregulated	1	3.5665	0.0283	downregulated	2	0.966245	0.3805					upregulated	2	5.05762	0.0064	upregulated	1	1.26177	0.2832	upregulated	1	2.41245	0.0896
negative regulation of extracellular matrix organization	GO	3 out of 7	7.6135	downregulated	3	6.64478	0.0013					upregulated	1	2.56156	0.0772	downregulated	1	1.25661	0.2846									upregulated	2	2.27366	0.1029
RNA polymerase II activating transcription factor binding	GO	5 out of 7	7.60957	downregulated	2	2.59914	0.0743	upregulated	1	0.346016	0.7075	downregulated	3	0.646701	0.5238	downregulated	3	2.78644	0.0616	upregulated	4	1.41408	0.2431	downregulated	6	2.04041	0.13	upregulated	4	2.54962	0.0781
cysteine-type endopeptidase activator activity involved in apoptotic process	GO	5 out of 7	7.56245	downregulated	2	2.81129	0.0601					upregulated	2	3.83158	0.0217	downregulated	2	2.40612	0.0902	upregulated	4	4.01178	0.0181	upregulated	1	0.582365	0.5586	upregulated	2	1.58246	0.2055
positive regulation of response to DNA damage stimulus	GO	2 out of 7	7.50913	upregulated	6	2.80186	0.0607	upregulated	5	2.30584	0.0997	downregulated	7	1.877	0.153	downregulated	10	8.45006	0.0002	upregulated	17	7.20622	0.0007	downregulated	8	1.45112	0.2343	downregulated	9	1.58833	0.2043
keratinocyte differentiation	GO	4 out of 7	7.48476	downregulated	4	1.38958	0.2492	downregulated	4	2.70403	0.0669	upregulated	2	1.28205	0.2775	upregulated	2	1.10688	0.3306	upregulated	7	3.60615	0.0272	downregulated	5	1.87244	0.1537	upregulated	11	2.17393	0.1137
intestinal absorption	GO	5 out of 7	7.47778					upregulated	1	0.644161	0.5251	downregulated	2	0.442774	0.6423	downregulated	3	4.23429	0.0145	upregulated	4	2.88541	0.0558	upregulated	1	0.449262	0.6381	upregulated	1	0.110209	0.8956
positive regulation of protein maturation	GO	5 out of 7	7.47437	downregulated	1	0.786226	0.4556	upregulated	3	4.27412	0.0139	downregulated	3	4.17162	0.0154	downregulated	2	5.68606	0.0034	downregulated	4	2.60403	0.074	upregulated	3	2.5108	0.0812	upregulated	2	1.19782	0.3019
lamin binding	GO	1 out of 7	7.46					upregulated	2	3.58992	0.0276	downregulated	1	1.33102	0.2642	upregulated	2	4.45343	0.0116	upregulated	6	7.46	0.0006	upregulated	2	1.67904	0.1866	upregulated	5	4.1599	0.0156
ciliary transition fiber	GO	4 out of 7	7.4555	upregulated	1	1.83137	0.1602					upregulated	1	1.36295	0.2559	downregulated	2	2.43436	0.0877	upregulated	3	4.80468	0.0082	upregulated	1	1.70675	0.1815	upregulated	2	1.70403	0.1819
response to gravity	GO	4 out of 7	7.44599									downregulated	1	1.9445	0.1431	downregulated	1	2.85317	0.0577	upregulated	1	1.35193	0.2587					upregulated	1	1.29639	0.2735
defense response to virus	GO	6 out of 7	7.39226	downregulated	6	1.78871	0.1672	upregulated	14	12.1602	5.2e-06	downregulated	14	4.09093	0.0167	downregulated	10	6.20098	0.002	upregulated	15	4.28813	0.0137	upregulated	7	0.872627	0.4179	upregulated	16	2.3111	0.0992
pseudopodium	GO	4 out of 7	7.38531	upregulated	1	1.58356	0.2052	upregulated	1	0.924089	0.3969	downregulated	4	4.55279	0.0105	downregulated	2	2.78087	0.062	upregulated	2	1.52546	0.2175	downregulated	2	1.36475	0.2554	upregulated	3	2.39858	0.0908
hair follicle morphogenesis	GO	4 out of 7	7.35563	downregulated	2	1.94448	0.1431	downregulated	1	4.31148	0.0134	downregulated	3	2.22348	0.1082					upregulated	1	3.84553	0.0214	downregulated	1	2.20026	0.1108	downregulated	1	2.76907	0.0627
cardiocyte differentiation	GO	5 out of 7	7.34245	upregulated	8	5.86288	0.0028	upregulated	3	0.472611	0.6234	downregulated	6	4.8809	0.0076	downregulated	3	2.79866	0.0609	upregulated	9	0.862849	0.422	upregulated	8	2.93156	0.0533	upregulated	10	2.20397	0.1104
regulation of response to DNA damage stimulus	GO	3 out of 7	7.31366	upregulated	14	1.61463	0.199	upregulated	11	2.90297	0.0549	upregulated	7	1.96739	0.1398	downregulated	15	10.0363	4.4e-05	upregulated	27	3.95255	0.0192	downregulated	21	0.549466	0.5773	upregulated	13	0.359319	0.6982
peptide transmembrane transporter activity	GO	2 out of 7	7.20232	upregulated	1	0.272256	0.7617					downregulated	2	6.04108	0.0024					downregulated	3	4.35835	0.0128	downregulated	9	6.75978	0.0012	upregulated	4	5.79184	0.0031
negative regulation of hydrogen peroxide-induced cell death	GO	5 out of 7	7.19795	upregulated	2	1.90144	0.1494	upregulated	2	5.27725	0.0051	downregulated	3	4.87157	0.0077	downregulated	1	2.62727	0.0723	upregulated	2	3.54388	0.0289	upregulated	1	1.47672	0.2284	upregulated	2	1.8572	0.1561
branching morphogenesis of an epithelial tube	GO	4 out of 7	7.16124	downregulated	8	3.23695	0.0393	upregulated	2	1.02432	0.359	downregulated	11	4.71845	0.0089	upregulated	1	0.778667	0.459	downregulated	7	3.70515	0.0246	upregulated	4	2.79191	0.0613	upregulated	10	1.92207	0.1463
cytoplasmic sequestering of protein	GO	4 out of 7	7.15082	upregulated	1	1.18161	0.3068	downregulated	1	1.71129	0.1806	upregulated	3	4.06516	0.0172	downregulated	1	1.0561	0.3478	upregulated	4	1.57036	0.208	downregulated	4	2.34059	0.0963	upregulated	7	8.05985	0.0003
regulation of cardiac muscle cell contraction	GO	5 out of 7	7.12869	downregulated	1	2.27105	0.1032	downregulated	1	3.31709	0.0363	downregulated	4	2.87896	0.0562	downregulated	1	1.54551	0.2132	downregulated	3	3.11189	0.0445	downregulated	7	5.00598	0.0067	upregulated	6	5.23396	0.0053
nucleotidyltransferase activity	GO	5 out of 7	7.11523	downregulated	3	0.622837	0.5364	upregulated	7	2.77275	0.0625	downregulated	10	1.42329	0.2409	downregulated	8	3.37588	0.0342	upregulated	16	3.34186	0.0354	upregulated	7	1.12411	0.3249	upregulated	10	1.68615	0.1852
transcriptional repressor activity, RNA polymerase II transcription factor binding	GO	4 out of 7	7.11437					upregulated	2	4.6648	0.0094	upregulated	1	2.00977	0.134	downregulated	2	3.46723	0.0312	upregulated	4	3.78137	0.0228	upregulated	1	0.442672	0.6423	upregulated	4	6.09766	0.0022
oxidoreductase activity, acting on NAD(P)H	GO	3 out of 7	7.06595	upregulated	3	0.346596	0.7071	upregulated	2	0.874883	0.4169	downregulated	8	1.65996	0.1901	downregulated	7	5.16653	0.0057	upregulated	7	6.85942	0.001	downregulated	14	3.56596	0.0283	downregulated	10	2.70742	0.0667
execution phase of apoptosis	GO	5 out of 7	7.04796	upregulated	3	1.15111	0.3163	upregulated	3	2.86257	0.0571	downregulated	5	2.24834	0.1056	downregulated	1	0.197854	0.8205	upregulated	8	4.23742	0.0144	upregulated	1	1.82865	0.1606	upregulated	5	2.54937	0.0781
PERK-mediated unfolded protein response	GO	3 out of 7	7.02312					downregulated	1	1.71629	0.1797	upregulated	2	4.11542	0.0163					downregulated	1	1.06984	0.3431	upregulated	2	3.83494	0.0216	upregulated	3	6.65714	0.0013
BMP binding	GO	3 out of 7	7.01696	upregulated	1	1.04887	0.3503	downregulated	1	2.57767	0.076	upregulated	2	4.991	0.0068									upregulated	2	5.75904	0.0032	upregulated	1	4.72012	0.0089
detection of biotic stimulus	GO	3 out of 7	7.0037					upregulated	1	3.61585	0.0269	downregulated	1	0.622947	0.5364	downregulated	3	6.13048	0.0022	upregulated	2	3.86612	0.0209
virion binding	GO	2 out of 7	6.95188	downregulated	3	7.69882	0.0005													downregulated	1	1.18781	0.3049	downregulated	1	1.30854	0.2702	upregulated	1	1.74941	0.1739
enteroendocrine cell differentiation	GO	4 out of 7	6.94946	upregulated	1	1.92653	0.1457					downregulated	2	2.73841	0.0647	upregulated	1	2.61145	0.0734	upregulated	3	2.9078	0.0546	upregulated	3	3.32841	0.0359	upregulated	3	2.51283	0.081
hydrolase activity, acting on glycosyl bonds	GO	3 out of 7	6.92557	downregulated	3	1.68707	0.1851	upregulated	3	0.596034	0.551	downregulated	12	5.62137	0.0036	downregulated	9	6.83508	0.0011	downregulated	5	1.7804	0.1686	downregulated	9	2.76678	0.0629	downregulated	5	2.07473	0.1256
negative regulation of cellular component movement	GO	4 out of 7	6.91726	upregulated	17	5.38983	0.0046	upregulated	10	4.2279	0.0146	downregulated	33	7.37388	0.0006	downregulated	15	5.59354	0.0037	downregulated	30	7.92912	0.0004	upregulated	19	3.92777	0.0197	upregulated	32	7.56891	0.0005
semaphorin-plexin signaling pathway involved in axon guidance	GO	3 out of 7	6.90813	downregulated	1	2.72177	0.0658					downregulated	3	2.81046	0.0602					downregulated	1	0.563981	0.5689	downregulated	3	1.48281	0.227	upregulated	3	3.42269	0.0326
GTPase activator activity	GO	1 out of 7	6.88551	upregulated	16	3.65333	0.0259	downregulated	5	0.567428	0.567	downregulated	30	6.18376	0.0021	downregulated	20	8.98732	0.0001	upregulated	41	6.88551	0.001	downregulated	52	13.3364	1.6e-06	downregulated	45	12.0895	5.6e-06
segmentation	GO	4 out of 7	6.86846	downregulated	3	1.86362	0.1551	downregulated	2	0.8979	0.4074	downregulated	10	5.71832	0.0033	downregulated	6	2.96524	0.0515	downregulated	6	2.46297	0.0852	downregulated	8	2.34441	0.0959	upregulated	6	2.09439	0.1231
cranial skeletal system development	GO	3 out of 7	6.85752	upregulated	1	2.36028	0.0944					downregulated	9	4.32124	0.0133	downregulated	3	1.0805	0.3394	upregulated	9	4.05877	0.0173	downregulated	4	1.1078	0.3303	downregulated	2	0.242703	0.7845
MLL3/4 complex	GO	3 out of 7	6.80721	upregulated	1	0.960393	0.3827					downregulated	1	0.470395	0.6248					upregulated	4	6.06749	0.0023					upregulated	2	1.22973	0.2924
response to osmotic stress	GO	2 out of 7	6.76492	upregulated	3	1.29216	0.2747	upregulated	1	2.24803	0.1056	downregulated	7	6.57263	0.0014	downregulated	10	8.819	0.0001	downregulated	4	5.08652	0.0062	downregulated	8	5.66412	0.0035	downregulated	6	4.9727	0.0069
negative regulation of cellular protein catabolic process	GO	2 out of 7	6.74803	downregulated	1	2.03396	0.1308	upregulated	3	0.846149	0.4291	downregulated	5	1.554	0.2114	upregulated	1	1.48365	0.2268	upregulated	9	1.45506	0.2334	downregulated	13	1.096	0.3342	upregulated	11	7.23512	0.0007
disordered domain specific binding	GO	3 out of 7	6.73883					upregulated	1	0.237608	0.7885	downregulated	6	2.40516	0.0903	downregulated	5	3.76652	0.0231	upregulated	5	4.83528	0.0079	downregulated	8	6.09441	0.0023	upregulated	5	6.89917	0.001
digestive tract morphogenesis	GO	6 out of 7	6.73103	downregulated	3	1.82866	0.1606	downregulated	1	1.26483	0.2823	downregulated	2	0.992382	0.3707	downregulated	1	0.228304	0.7959	upregulated	2	2.14144	0.1175	downregulated	4	0.298964	0.7416	upregulated	2	0.574383	0.5631
estrogen metabolic process	GO	3 out of 7	6.70402					upregulated	1	1.0469	0.351	downregulated	3	1.683	0.1858	downregulated	3	4.67153	0.0094	downregulated	3	1.8142	0.163	downregulated	2	0.498658	0.6073	upregulated	3	3.70925	0.0245
deacetylase activity	GO	4 out of 7	6.70124	upregulated	6	4.71406	0.009	upregulated	2	1.35551	0.2578	downregulated	3	0.266921	0.7657	upregulated	2	2.23877	0.1066	upregulated	14	7.45002	0.0006	upregulated	6	2.97193	0.0512	upregulated	10	4.32072	0.0133
biomineral tissue development	GO	5 out of 7	6.67178	downregulated	3	1.59776	0.2024	upregulated	2	0.805108	0.447	downregulated	5	4.0446	0.0175	downregulated	1	1.39182	0.2486	downregulated	6	3.03535	0.0481	upregulated	6	2.00791	0.1343	upregulated	3	1.47015	0.2299
regulation of autophagosome maturation	GO	3 out of 7	6.66171													downregulated	1	1.22357	0.2942					upregulated	2	2.9477	0.0525	upregulated	2	2.49044	0.0829
basolateral plasma membrane	GO	4 out of 7	6.66068	downregulated	6	1.65826	0.1905	upregulated	7	4.27103	0.014	downregulated	14	4.446	0.0117	downregulated	9	5.55269	0.0039	downregulated	13	1.22765	0.293	downregulated	22	3.18413	0.0414	upregulated	13	3.68655	0.0251
palmitoyltransferase complex	GO	3 out of 7	6.64955									downregulated	2	5.53668	0.0039	downregulated	3	7.17928	0.0008	downregulated	4	7.99778	0.0003	upregulated	1	1.93136	0.145
spindle	GO	1 out of 7	6.63849	upregulated	27	6.16406	0.0021	upregulated	20	6.456	0.0016	downregulated	28	3.79928	0.0224	downregulated	16	2.33411	0.0969	upregulated	39	6.63849	0.0013	upregulated	16	6.95348	0.001	upregulated	41	14.2337	6.6e-07
chaperone complex	GO	3 out of 7	6.62727					upregulated	1	2.34827	0.0955									upregulated	4	4.49982	0.0111	upregulated	2	3.76151	0.0232	upregulated	1	0.714209	0.4896
positive regulation of pri-miRNA transcription by RNA polymerase II	GO	4 out of 7	6.60624	downregulated	2	2.16831	0.1144					downregulated	3	1.27468	0.2795	downregulated	1	1.18809	0.3048	upregulated	4	2.92168	0.0538	downregulated	1	0.946522	0.3881	downregulated	1	0.370674	0.6903
response to nutrient levels	GO	3 out of 7	6.59167	downregulated	9	4.04072	0.0176	upregulated	17	6.11429	0.0022	upregulated	21	4.51427	0.011	downregulated	26	10.3667	3.1e-05	downregulated	39	8.27337	0.0003	upregulated	28	5.25881	0.0052	upregulated	39	11.0862	1.5e-05
ribosome biogenesis	GO	3 out of 7	6.57742	upregulated	16	2.89433	0.0553	upregulated	14	3.29162	0.0372	upregulated	4	1.39473	0.2479	upregulated	1	0.570378	0.5653	upregulated	24	3.3776	0.0341	upregulated	17	2.43424	0.0877	upregulated	28	8.91664	0.0001
maintenance of protein location	GO	4 out of 7	6.54572	upregulated	6	3.61636	0.0269	upregulated	6	5.08485	0.0062	downregulated	11	4.01075	0.0181	downregulated	7	5.66816	0.0035	upregulated	17	2.89087	0.0555	downregulated	15	1.763	0.1715	upregulated	15	4.44017	0.0118
transcription factor activity, direct ligand regulated sequence-specific DNA binding	GO	4 out of 7	6.47846	downregulated	3	1.73583	0.1763	downregulated	2	2.14088	0.1176	downregulated	2	0.0724494	0.9301	upregulated	2	3.68353	0.0251	upregulated	8	6.21283	0.002	downregulated	4	2.3821	0.0924	upregulated	5	1.88496	0.1518
cellular defense response	GO	3 out of 7	6.4728	upregulated	1	0.186259	0.8301	upregulated	1	3.06764	0.0465	downregulated	6	2.38968	0.0917	downregulated	4	3.86824	0.0209	upregulated	6	3.46878	0.0312	upregulated	4	1.56657	0.2088	upregulated	2	0.192968	0.8245
asymmetric stem cell division	GO	4 out of 7	6.42581	upregulated	1	1.07341	0.3418	downregulated	1	4.82294	0.008	downregulated	1	1.67922	0.1865	downregulated	2	3.27727	0.0377	downregulated	1	4.55849	0.0105	upregulated	3	7.28833	0.0007	downregulated	2	5.01006	0.0067
CatSper complex	GO	3 out of 7	6.40386									downregulated	1	2.62523	0.0724					downregulated	1	1.06196	0.3458	upregulated	1	3.05092	0.0473	upregulated	1	1.78968	0.167
transmission of nerve impulse	GO	3 out of 7	6.40318	upregulated	2	1.82362	0.1614					downregulated	4	2.77569	0.0623	downregulated	3	3.61382	0.0269	upregulated	3	1.83728	0.1593	upregulated	5	7.62066	0.0005	downregulated	8	3.6336	0.0264
oxidoreductase activity, acting on NAD(P)H, quinone or similar compound as acceptor	GO	4 out of 7	6.38001	upregulated	2	0.592191	0.5531	downregulated	1	1.41001	0.2441	downregulated	3	0.640367	0.5271	downregulated	3	2.9138	0.0543	upregulated	7	8.72218	0.0002	downregulated	9	3.73135	0.024	downregulated	6	2.98281	0.0507
interleukin-2-mediated signaling pathway	GO	3 out of 7	6.3772									downregulated	1	2.27308	0.103	downregulated	1	3.76622	0.0231	upregulated	1	0.337893	0.7133
regulation of intrinsic apoptotic signaling pathway in response to DNA damage	GO	3 out of 7	6.37085	upregulated	3	1.03599	0.3549	upregulated	3	3.13548	0.0435	downregulated	2	2.06571	0.1267	downregulated	6	9.07475	0.0001	downregulated	3	1.05393	0.3486	downregulated	2	0.365017	0.6942	upregulated	2	0.820797	0.4401
protein localization to lysosome	GO	4 out of 7	6.36542	upregulated	3	3.7252	0.0241	upregulated	2	2.96117	0.0518	downregulated	4	2.90865	0.0545	downregulated	3	3.11913	0.0442	upregulated	5	3.22536	0.0397	upregulated	4	3.99964	0.0183	upregulated	3	3.02437	0.0486
protein transporter activity	GO	3 out of 7	6.29536	upregulated	6	1.10046	0.3327	upregulated	4	2.02161	0.1324	downregulated	3	7.65195	0.0005	downregulated	3	1.35362	0.2583	downregulated	12	5.78323	0.0031	upregulated	7	5.6702	0.0034	upregulated	10	6.1951	0.002
bone trabecula morphogenesis	GO	4 out of 7	6.25379	downregulated	1	1.69729	0.1832					downregulated	2	3.05356	0.0472					upregulated	1	0.995621	0.3695	downregulated	1	0.381512	0.6828	upregulated	1	0.88883	0.4111
centriole replication	GO	3 out of 7	6.24723									downregulated	4	2.67949	0.0686	downregulated	2	1.68535	0.1854	upregulated	3	1.88239	0.1522	upregulated	1	1.58599	0.2047	upregulated	2	1.61668	0.1986
phospholipase A2 activity (consuming 1,2-dipalmitoylphosphatidylcholine)	GO	3 out of 7	6.19358									downregulated	1	1.53854	0.2147					downregulated	2	1.54267	0.2138	upregulated	1	2.31286	0.099	upregulated	3	3.88486	0.0206
phospholipase A2 activity consuming 1,2-dioleoylphosphatidylethanolamine)	GO	3 out of 7	6.19358									downregulated	1	1.53854	0.2147					downregulated	2	1.54267	0.2138	upregulated	1	2.31286	0.099	upregulated	3	3.88486	0.0206
regulation of cell-cell adhesion mediated by cadherin	GO	3 out of 7	6.18746	upregulated	1	3.11204	0.0445					downregulated	2	2.34742	0.0956					downregulated	3	3.10007	0.045	upregulated	1	3.25385	0.0386	upregulated	1	3.69823	0.0248
rRNA binding	GO	3 out of 7	6.18567	upregulated	2	0.220124	0.8024	upregulated	2	0.972176	0.3783	downregulated	4	1.07741	0.3405	downregulated	3	1.14261	0.319	downregulated	5	5.18571	0.0056	downregulated	6	3.22355	0.0398	upregulated	15	13.5672	1.3e-06
hydrolase activity, acting on carbon-nitrogen (but not peptide) bonds, in linear amides	GO	4 out of 7	6.13764	upregulated	7	5.77389	0.0031	upregulated	5	4.08775	0.0168	downregulated	9	3.74054	0.0237	downregulated	4	2.18265	0.1127	upregulated	16	4.77647	0.0084	upregulated	10	3.51747	0.0297	upregulated	12	3.96479	0.019
response to mitochondrial depolarisation	GO	5 out of 7	6.10046	downregulated	1	1.30306	0.2717					downregulated	3	1.81018	0.1636	downregulated	2	1.9007	0.1495	downregulated	3	3.74532	0.0236	upregulated	2	2.80859	0.0603	upregulated	2	2.02325	0.1322
ribosomal large subunit biogenesis	GO	5 out of 7	6.07455	upregulated	1	0.0606725	0.9411	upregulated	4	1.41084	0.2439	downregulated	2	0.196236	0.8218	downregulated	2	0.566125	0.5677	upregulated	8	1.63995	0.194	upregulated	7	3.69025	0.025	upregulated	6	1.4535	0.2337
positive regulation of protein import	GO	5 out of 7	6.04852	upregulated	2	1.40847	0.2445	upregulated	1	0.194855	0.823	downregulated	3	1.60563	0.2008	downregulated	2	0.805038	0.4471	upregulated	3	1.63043	0.1958	upregulated	1	0.109831	0.896	upregulated	6	3.50091	0.0302
negative regulation of telomere maintenance via telomere lengthening	GO	5 out of 7	6.03869	upregulated	3	2.52944	0.0797	upregulated	1	1.97137	0.1393	downregulated	2	1.22908	0.2926	downregulated	1	1.07894	0.34	upregulated	5	4.70855	0.009	upregulated	3	2.73444	0.0649	upregulated	3	0.788481	0.4545
blastoderm segmentation	GO	3 out of 7	6.01148	downregulated	2	2.87471	0.0564					downregulated	2	2.94345	0.0527	downregulated	1	0.938826	0.3911	downregulated	2	0.745511	0.4745	downregulated	2	1.97794	0.1384	downregulated	2	1.7652	0.1712
neuroblast proliferation	GO	3 out of 7	5.98901					downregulated	1	1.27517	0.2794	downregulated	6	8.01168	0.0003	downregulated	5	9.03095	0.0001	downregulated	5	3.6493	0.026	downregulated	5	5.06772	0.0063	downregulated	3	3.61178	0.027
regulation of muscle contraction	GO	3 out of 7	5.97481	downregulated	3	3.60728	0.0271	upregulated	5	2.87198	0.0566	downregulated	11	4.58511	0.0102	downregulated	6	3.60449	0.0272	downregulated	12	2.95009	0.0523	downregulated	17	3.93111	0.0196	upregulated	15	4.47018	0.0114
cysteine-type endopeptidase activity involved in apoptotic process	GO	5 out of 7	5.9745	downregulated	1	1.67641	0.187	upregulated	1	0.874924	0.4169	upregulated	1	0.852954	0.4262	downregulated	1	1.87014	0.1541	upregulated	3	2.67692	0.0688	upregulated	1	0.379213	0.6844	upregulated	1	1.0997	0.333
negative regulation of multicellular organism growth	GO	3 out of 7	5.9682	downregulated	1	3.62434	0.0267					downregulated	1	0.717273	0.4881					upregulated	1	1.62659	0.1966
clathrin adaptor complex	GO	5 out of 7	5.96716	downregulated	3	4.10961	0.0164	downregulated	2	2.37523	0.093	downregulated	4	3.71293	0.0244	downregulated	1	0.384084	0.6811	upregulated	6	1.8062	0.1643	downregulated	9	6.4209	0.0016	upregulated	3	2.90578	0.0547
U12-type spliceosomal complex	GO	1 out of 7	5.94717					upregulated	3	3.63204	0.0265	upregulated	1	1.7117	0.1806	downregulated	1	0.750303	0.4722	upregulated	6	5.94717	0.0026	upregulated	1	0.677825	0.5077	upregulated	3	2.02443	0.1321
craniofacial suture morphogenesis	GO	4 out of 7	5.93415									downregulated	1	0.805564	0.4468	downregulated	1	0.819797	0.4405	upregulated	3	4.21856	0.0147	upregulated	1	1.26578	0.282	downregulated	2	1.17554	0.3087
interstrand cross-link repair	GO	5 out of 7	5.92783	upregulated	4	1.59797	0.2023	upregulated	4	2.81735	0.0598	downregulated	4	1.45838	0.2326	downregulated	3	1.44727	0.2352	upregulated	8	5.06583	0.0063	upregulated	3	1.78457	0.1679	upregulated	3	0.587097	0.5559
cellular response to thyroid hormone stimulus	GO	3 out of 7	5.92283					upregulated	1	2.15853	0.1155	downregulated	1	2.90874	0.0545	downregulated	2	4.90414	0.0074	upregulated	3	3.40387	0.0332	downregulated	2	1.99831	0.1356	downregulated	2	3.29561	0.037
contractile fiber	GO	4 out of 7	5.92021	downregulated	3	2.53081	0.0796	downregulated	5	2.04193	0.1298	downregulated	16	3.12825	0.0438	upregulated	3	2.75932	0.0633	downregulated	14	4.48933	0.0112	downregulated	30	6.54381	0.0014	upregulated	25	7.52235	0.0005
neuron projection fasciculation	GO	5 out of 7	5.85399	downregulated	1	2.20648	0.1101	downregulated	1	1.46325	0.2315	downregulated	2	3.64803	0.026	downregulated	2	3.17265	0.0419	upregulated	1	1.81757	0.1624	downregulated	5	4.25663	0.0142	downregulated	4	2.19737	0.1111
dendritic spine organization	GO	4 out of 7	5.84166	downregulated	1	0.771086	0.4625	downregulated	1	3.99667	0.0184	downregulated	4	2.8706	0.0567	upregulated	1	2.65985	0.07	upregulated	3	2.62528	0.0724	downregulated	6	5.59101	0.0037	upregulated	5	6.45417	0.0016
positive regulation of cell cycle	GO	4 out of 7	5.83457	upregulated	14	0.737738	0.4782	upregulated	17	4.33596	0.0131	downregulated	32	4.36522	0.0127	downregulated	18	1.46134	0.2319	upregulated	46	6.16646	0.0021	downregulated	40	2.85458	0.0576	upregulated	29	1.76984	0.1704
phosphatidylinositol binding	GO	4 out of 7	5.80131	downregulated	7	3.30963	0.0365	upregulated	5	1.34639	0.2602	downregulated	27	12.805	2.7e-06	downregulated	15	7.97163	0.0003	upregulated	24	3.07124	0.0464	downregulated	39	11.4452	1.1e-05	downregulated	33	8.56459	0.0002
IkappaB kinase complex	GO	4 out of 7	5.79847					upregulated	1	1.1751	0.3088	downregulated	2	2.89908	0.0551	downregulated	2	2.58897	0.0751	upregulated	2	1.01447	0.3626					upregulated	1	0.471052	0.6243
regulation of NMDA receptor activity	GO	3 out of 7	5.77717	upregulated	2	4.1564	0.0157					upregulated	1	1.30077	0.2723					upregulated	2	4.92976	0.0072	upregulated	2	3.54209	0.029	upregulated	1	2.76249	0.0631
positive regulation of response to wounding	GO	5 out of 7	5.75796	downregulated	3	1.7009	0.1825	upregulated	3	2.96833	0.0514	downregulated	5	3.61033	0.027	downregulated	3	1.00677	0.3654	downregulated	6	2.57272	0.0763	upregulated	2	1.24493	0.288	upregulated	4	3.73608	0.0238
regulation of animal organ morphogenesis	GO	4 out of 7	5.74405	upregulated	13	2.89404	0.0554	downregulated	7	2.91999	0.0539	downregulated	19	3.77391	0.023	upregulated	1	1.64136	0.1937	upregulated	19	3.34684	0.0352	upregulated	10	2.41481	0.0894	downregulated	18	2.1761	0.1135
semaphorin-plexin signaling pathway involved in neuron projection guidance	GO	3 out of 7	5.72732	downregulated	1	2.3986	0.0908					downregulated	3	2.03235	0.131					downregulated	1	0.367899	0.6922	downregulated	3	0.841899	0.4309	upregulated	3	2.50617	0.0816
lipoprotein particle binding	GO	5 out of 7	5.70158					downregulated	1	0.78323	0.4569	upregulated	1	4.48965	0.0112	downregulated	3	3.00497	0.0495	upregulated	4	1.95226	0.142	upregulated	2	0.966287	0.3805	upregulated	3	3.48448	0.0307
negative regulation of intrinsic apoptotic signaling pathway in response to DNA damage	GO	2 out of 7	5.69853	upregulated	2	0.754149	0.4704	upregulated	3	3.30019	0.0369	downregulated	1	2.26298	0.104	downregulated	4	8.821	0.0001	downregulated	2	1.16841	0.3109	downregulated	1	0.142707	0.867	downregulated	1	0.0200042	0.9802
nucleotide-binding domain, leucine rich repeat containing receptor signaling pathway	GO	4 out of 7	5.69211	upregulated	1	0.908993	0.4029	upregulated	1	0.598244	0.5498	downregulated	2	0.750393	0.4722	downregulated	1	0.794722	0.4517	upregulated	5	4.35367	0.0129	downregulated	3	1.96603	0.14	upregulated	2	3.26659	0.0381
cellular extravasation	GO	4 out of 7	5.67123					upregulated	1	3.45688	0.0315	downregulated	2	2.386	0.092	downregulated	2	5.16999	0.0057	upregulated	3	0.664118	0.5147	downregulated	3	2.36101	0.0943	upregulated	4	3.26901	0.038
negative regulation of substrate adhesion-dependent cell spreading	GO	5 out of 7	5.66776	downregulated	1	1.84209	0.1585					upregulated	2	3.8713	0.0208	downregulated	1	1.16316	0.3125	upregulated	3	2.71515	0.0662	upregulated	1	2.00655	0.1345	upregulated	2	1.81211	0.1633
integrator complex	GO	4 out of 7	5.63375									downregulated	2	0.918781	0.399	downregulated	2	2.09025	0.1237	upregulated	2	2.36467	0.094					upregulated	1	0.26005	0.771
asymmetric cell division	GO	4 out of 7	5.62996	upregulated	1	0.593916	0.5522	downregulated	1	4.38326	0.0125	downregulated	1	1.11692	0.3273	downregulated	2	2.13526	0.1182	downregulated	1	3.91079	0.02	upregulated	4	6.8634	0.001	downregulated	3	4.36418	0.0127
sequence-specific single stranded DNA binding	GO	4 out of 7	5.62167	upregulated	3	2.99266	0.0502	upregulated	2	3.11025	0.0446	downregulated	2	3.29168	0.0372	downregulated	2	2.94194	0.0528	upregulated	3	3.00774	0.0494	downregulated	3	1.26025	0.2836	upregulated	3	3.74348	0.0237
negative regulation of DNA biosynthetic process	GO	5 out of 7	5.59313	upregulated	3	2.02412	0.1321	upregulated	2	2.77032	0.0626	downregulated	3	1.54932	0.2124	downregulated	1	0.758712	0.4683	upregulated	7	4.83733	0.0079	upregulated	2	1.69745	0.1832	upregulated	4	1.54475	0.2134
embryonic cranial skeleton morphogenesis	GO	4 out of 7	5.52472	upregulated	1	2.87459	0.0564					downregulated	8	4.53862	0.0107	downregulated	2	1.33025	0.2644	upregulated	7	2.37286	0.0932	upregulated	4	1.23112	0.292	upregulated	3	0.157576	0.8542
negative regulation of cardiocyte differentiation	GO	4 out of 7	5.52136	upregulated	1	1.54306	0.2137					downregulated	1	1.36225	0.2561	downregulated	1	0.712673	0.4903	upregulated	4	6.33333	0.0018	upregulated	2	2.92763	0.0535	downregulated	4	4.27147	0.014
regulation of cilium assembly	GO	5 out of 7	5.51798	upregulated	5	1.66961	0.1883	downregulated	2	1.46987	0.23	downregulated	9	2.21826	0.1088	downregulated	3	0.493023	0.6108	upregulated	11	3.08708	0.0456	downregulated	14	4.01162	0.0181	upregulated	9	2.26136	0.1042
regulation of defense response to virus	GO	6 out of 7	5.51343	downregulated	2	1.31053	0.2697	upregulated	7	5.42643	0.0044	downregulated	5	2.05139	0.1286	downregulated	3	1.85354	0.1567	upregulated	5	0.88319	0.4135	upregulated	4	1.1769	0.3082	upregulated	8	3.66432	0.0256
DNA methylation	GO	1 out of 7	5.47262	downregulated	1	0.658603	0.5176	upregulated	1	0.352286	0.7031	downregulated	3	0.956975	0.3841	downregulated	3	2.2595	0.1044	upregulated	8	5.47262	0.0042	downregulated	5	1.72959	0.1774	upregulated	4	0.820188	0.4403
toxin transport	GO	5 out of 7	5.458	downregulated	1	1.79923	0.1654	downregulated	1	1.61472	0.1989	upregulated	2	1.56796	0.2085	downregulated	1	0.806216	0.4465	upregulated	5	3.12303	0.044	downregulated	2	1.95084	0.1422	upregulated	4	1.63361	0.1952
attachment of spindle microtubules to kinetochore	GO	3 out of 7	5.44176	upregulated	1	1.18482	0.3058	upregulated	2	1.94234	0.1434	downregulated	5	4.55279	0.0105	downregulated	2	2.89559	0.0553	upregulated	2	2.75102	0.0639	downregulated	1	0.942092	0.3898	downregulated	1	0.688389	0.5024
regulation of intrinsic apoptotic signaling pathway by p53 class mediator	GO	4 out of 7	5.41795	upregulated	3	1.94147	0.1435	upregulated	3	3.48434	0.0307	downregulated	1	2.36299	0.0941	downregulated	3	5.86856	0.0028	upregulated	3	1.5801	0.206	downregulated	2	0.730091	0.4819	upregulated	1	1.7622	0.1717
regulation of apoptotic process involved in development	GO	3 out of 7	5.40947	downregulated	2	2.72952	0.0653																	upregulated	2	1.44152	0.2366	upregulated	2	1.23843	0.2898
mitotic spindle organization	GO	3 out of 7	5.35955	upregulated	5	2.01208	0.1337	upregulated	5	2.53913	0.0789	downregulated	8	2.7902	0.0614	downregulated	4	1.23708	0.2902	upregulated	9	3.8714	0.0208	downregulated	13	3.28833	0.0373	downregulated	14	5.27512	0.0051
neuron fate specification	GO	3 out of 7	5.33312									downregulated	3	2.25445	0.1049					upregulated	2	2.41613	0.0893	upregulated	3	2.91192	0.0544	downregulated	4	2.24938	0.1055
cell division site	GO	3 out of 7	5.32785	upregulated	6	2.27733	0.1026	upregulated	5	1.95608	0.1414	downregulated	5	3.80458	0.0223	downregulated	4	3.10139	0.045	downregulated	8	5.50301	0.0041	upregulated	3	2.90758	0.0546	upregulated	10	8.1583	0.0003
positive regulation of gene silencing by miRNA	GO	5 out of 7	5.30619	downregulated	1	0.807404	0.446					downregulated	4	1.90175	0.1493	downregulated	1	0.615894	0.5402	upregulated	2	1.81627	0.1626	upregulated	1	0.218072	0.8041	upregulated	1	0.754202	0.4704
regulation of neural precursor cell proliferation	GO	3 out of 7	5.29613	upregulated	2	2.56532	0.0769	upregulated	4	4.19528	0.0151	downregulated	4	3.48498	0.0307	downregulated	2	1.38543	0.2502	upregulated	7	1.30284	0.2718	upregulated	8	5.08528	0.0062	upregulated	9	5.58602	0.0037
negative regulation of intrinsic apoptotic signaling pathway in response to DNA damage by p53 class mediator	GO	3 out of 7	5.29049	upregulated	2	1.64122	0.1937	upregulated	3	3.96048	0.0191	downregulated	1	2.92929	0.0534	downregulated	3	7.0526	0.0009	upregulated	2	1.38017	0.2515	downregulated	1	0.469873	0.6251
positive regulation of mitochondrial outer membrane permeabilization involved in apoptotic signaling pathway	GO	5 out of 7	5.28168	downregulated	3	2.88359	0.0559	downregulated	1	1.14754	0.3174	downregulated	4	2.5308	0.0796	downregulated	1	0.5116	0.5995	upregulated	2	1.37746	0.2522	downregulated	5	3.16931	0.042	upregulated	4	5.52805	0.004
anterior/posterior pattern specification	GO	4 out of 7	5.27267	upregulated	10	1.94932	0.1424	downregulated	3	1.82181	0.1617	downregulated	14	1.77839	0.1689	downregulated	6	1.02223	0.3598	upregulated	23	7.47327	0.0006	downregulated	19	3.90599	0.0201	downregulated	14	2.91705	0.0541
activin binding	GO	3 out of 7	5.2661	upregulated	4	4.57594	0.0103					downregulated	2	2.19094	0.1118	downregulated	2	2.45145	0.0862	upregulated	5	5.64466	0.0035	downregulated	1	0.224384	0.799	downregulated	1	0.220625	0.802
oocyte development	GO	6 out of 7	5.2302	downregulated	1	0.640648	0.527	downregulated	1	0.884866	0.4128	downregulated	3	1.65798	0.1905	downregulated	2	1.28974	0.2753	upregulated	3	1.27445	0.2796	downregulated	3	1.58105	0.2058	upregulated	3	1.06358	0.3452
phosphatidylinositol acyl-chain remodeling	GO	3 out of 7	5.22887									downregulated	1	1.73117	0.1771					downregulated	2	1.87557	0.1533	upregulated	1	2.50046	0.082	upregulated	2	2.87281	0.0565
plasma membrane tubulation	GO	3 out of 7	5.219	downregulated	2	5.11126	0.006					downregulated	3	3.46656	0.0312					upregulated	2	1.52931	0.2167	downregulated	2	2.62502	0.0724	downregulated	2	2.26311	0.104
positive regulation of receptor binding	GO	4 out of 7	5.20613	downregulated	1	2.66811	0.0694					downregulated	1	1.4456	0.2356	upregulated	1	3.42947	0.0324	downregulated	1	0.417623	0.6586	upregulated	2	2.80425	0.0606	upregulated	1	2.13527	0.1182
laminin binding	GO	2 out of 7	5.18727	upregulated	1	0.264614	0.7675					downregulated	2	5.62926	0.0036	downregulated	3	4.85253	0.0078	downregulated	1	0.802742	0.4481	downregulated	3	2.16123	0.1152	downregulated	3	2.06593	0.1267
protein localization to cytoskeleton	GO	4 out of 7	5.18446	upregulated	4	3.11437	0.0444	upregulated	1	0.300507	0.7404	downregulated	5	4.27759	0.0139	downregulated	2	1.46004	0.2322	upregulated	4	2.69816	0.0673	downregulated	7	3.45164	0.0317	upregulated	5	3.61519	0.0269
centrosome cycle	GO	3 out of 7	5.17258	upregulated	3	1.19355	0.3031	upregulated	7	6.03609	0.0024	downregulated	10	4.47432	0.0114	downregulated	7	5.4372	0.0044	upregulated	10	2.4907	0.0829	upregulated	6	5.6151	0.0036	upregulated	9	2.57676	0.076
oxidoreductase activity, acting on the CH-NH group of donors	GO	4 out of 7	5.14851	downregulated	3	4.09535	0.0166	upregulated	1	1.50328	0.2224	upregulated	2	3.40491	0.0332	upregulated	1	1.9565	0.1414	upregulated	5	4.2302	0.0145	upregulated	3	3.22458	0.0398	upregulated	2	0.463071	0.6293
endoderm development	GO	3 out of 7	5.13218	upregulated	1	1.09506	0.3345	upregulated	1	0.681151	0.506	downregulated	5	3.49705	0.0303	downregulated	4	3.23521	0.0394	downregulated	2	0.473622	0.6227	downregulated	6	0.359195	0.6982	upregulated	5	1.00894	0.3646
histone H3-K4 trimethylation	GO	4 out of 7	5.11963	upregulated	1	0.707958	0.4926	upregulated	1	0.678656	0.5073	downregulated	1	0.497772	0.6079	downregulated	1	0.940783	0.3903	downregulated	3	3.31462	0.0363	upregulated	3	4.51399	0.011	upregulated	1	3.86832	0.0209
embryonic digestive tract development	GO	4 out of 7	5.10109	downregulated	2	1.54239	0.2139					downregulated	3	2.41082	0.0897	upregulated	1	2.33247	0.0971	upregulated	3	2.82487	0.0593	upregulated	3	1.2636	0.2826	downregulated	2	0.60812	0.5444
gland morphogenesis	GO	4 out of 7	5.0197	downregulated	5	1.61836	0.1982	downregulated	2	2.79864	0.0609	downregulated	7	1.1743	0.309	upregulated	1	0.937021	0.3918	upregulated	7	2.567	0.0768	downregulated	10	1.04409	0.352	upregulated	8	1.40951	0.2443
lipid digestion	GO	2 out of 7	5.01309									upregulated	1	2.80159	0.0607	downregulated	2	4.00095	0.0183	upregulated	1	3.81373	0.0221
viral genome replication	GO	4 out of 7	5.01207	upregulated	2	1.13827	0.3204	downregulated	1	4.17328	0.0154	downregulated	3	2.6901	0.0679	downregulated	1	2.04522	0.1294	upregulated	6	3.72241	0.0242	downregulated	3	3.32792	0.0359	downregulated	3	3.15276	0.0427
renal tubule morphogenesis	GO	4 out of 7	5.01002	upregulated	4	2.66735	0.0694	downregulated	3	2.59636	0.0745	downregulated	7	6.34919	0.0017	downregulated	4	3.51447	0.0298	downregulated	5	4.25935	0.0141	downregulated	5	5.34451	0.0048	upregulated	9	4.82122	0.0081
insulin-like growth factor binding	GO	1 out of 7	4.97776	downregulated	1	1.68768	0.1849	upregulated	1	2.68614	0.0681	downregulated	1	1.2803	0.278	downregulated	2	4.42077	0.012	upregulated	4	4.97776	0.0069	upregulated	1	0.716542	0.4884	upregulated	4	4.98839	0.0068
phagocytosis, recognition	GO	3 out of 7	4.96875	downregulated	2	2.68584	0.0682					downregulated	2	0.746432	0.4741	upregulated	1	1.53219	0.2161	upregulated	3	3.06867	0.0465	upregulated	3	3.5839	0.0278	upregulated	1	3.27035	0.038
negative regulation of signal transduction by p53 class mediator	GO	4 out of 7	4.9358	upregulated	3	1.40338	0.2458	upregulated	3	3.2198	0.04	downregulated	3	3.29079	0.0372	downregulated	4	5.69115	0.0034	upregulated	2	0.613455	0.5415	downregulated	2	0.232027	0.7929	upregulated	1	0.195609	0.8223
regulation of cardiac muscle cell differentiation	GO	4 out of 7	4.89542	upregulated	3	4.72004	0.0089					downregulated	3	3.79086	0.0226	downregulated	2	2.17202	0.1139	upregulated	3	4.0839	0.0168	upregulated	2	4.59893	0.0101	downregulated	6	5.03025	0.0065
transcription coactivator binding	GO	4 out of 7	4.87898	upregulated	1	0.292769	0.7462					downregulated	1	0.278813	0.7567					upregulated	3	1.40617	0.2451	upregulated	3	1.47844	0.228	upregulated	4	2.00832	0.1342
aorta morphogenesis	GO	6 out of 7	4.87296	downregulated	2	1.64928	0.1922	upregulated	1	2.14815	0.1167	downregulated	2	1.1181	0.3269	downregulated	1	0.859694	0.4233	upregulated	2	0.584687	0.5573	upregulated	4	2.10093	0.1223	upregulated	3	0.708415	0.4924
establishment of protein localization to vacuole	GO	3 out of 7	4.76788	upregulated	3	1.84125	0.1586	upregulated	1	0.927577	0.3955	downregulated	4	2.59835	0.0744	downregulated	6	5.67081	0.0034	downregulated	6	3.63011	0.0265	upregulated	2	3.87077	0.0208	upregulated	2	2.89765	0.0552
natural killer cell activation	GO	4 out of 7	4.74404	downregulated	1	0.911967	0.4017	upregulated	2	0.956467	0.3842	upregulated	3	1.84597	0.1579	downregulated	2	4.11239	0.0164	upregulated	2	0.176538	0.8382	upregulated	4	1.21914	0.2955	upregulated	3	0.499609	0.6068
carbon-sulfur lyase activity	GO	3 out of 7	4.73111	upregulated	1	1.4611	0.232	upregulated	1	1.286	0.2764	downregulated	1	4.33488	0.0131	downregulated	1	5.24738	0.0053	upregulated	1	1.39137	0.2487	downregulated	1	1.02818	0.3577	downregulated	3	2.46724	0.0848
deaminase activity	GO	5 out of 7	4.72579	downregulated	1	1.40256	0.246	upregulated	3	3.83974	0.0215	downregulated	2	5.122	0.006	downregulated	1	1.07745	0.3405	upregulated	2	1.54338	0.2137	downregulated	4	1.6664	0.1889	upregulated	2	1.08654	0.3374
regulation of T cell migration	GO	3 out of 7	4.71889									downregulated	4	2.1453	0.117	downregulated	3	3.74649	0.0236	downregulated	3	1.30408	0.2714					upregulated	1	0.131176	0.8771
chromosome separation	GO	4 out of 7	4.67537					upregulated	1	0.989949	0.3716	downregulated	3	1.331	0.2642	upregulated	1	1.69611	0.1834	upregulated	5	2.40416	0.0903	upregulated	3	3.3689	0.0344	upregulated	1	0.25737	0.7731
RNAi effector complex	GO	3 out of 7	4.64084					upregulated	1	1.52519	0.2176	downregulated	3	2.02024	0.1326	downregulated	3	3.76491	0.0232	downregulated	1	1.36264	0.256	downregulated	1	0.877914	0.4156	upregulated	2	2.62143	0.0727
endoplasmic reticulum lumen	GO	1 out of 7	4.63018	downregulated	10	4.26955	0.014	upregulated	8	1.36645	0.255	downregulated	21	4.33368	0.0131	downregulated	14	8.37465	0.0002	upregulated	24	4.63018	0.0098	downregulated	24	2.0629	0.1271	upregulated	15	2.5671	0.0768
walking behavior	GO	3 out of 7	4.62512	downregulated	2	4.67176	0.0094					downregulated	4	4.97296	0.0069	downregulated	4	6.18006	0.0021	downregulated	2	5.22711	0.0054	downregulated	6	5.81862	0.003	downregulated	7	5.38104	0.0046
viral RNA genome replication	GO	4 out of 7	4.58433	upregulated	1	0.996781	0.3691	downregulated	1	4.92982	0.0072	downregulated	3	4.65355	0.0095	downregulated	1	2.74104	0.0645	upregulated	3	3.08106	0.0459	downregulated	3	4.73046	0.0088	downregulated	3	5.09389	0.0061
positive regulation of amyloid-beta formation	GO	3 out of 7	4.58101													downregulated	1	1.43853	0.2373	upregulated	2	2.56867	0.0766	downregulated	1	0.709788	0.4917	upregulated	1	1.2836	0.277
regulation of RIG-I signaling pathway	GO	4 out of 7	4.57199					upregulated	1	3.17221	0.0419	downregulated	3	3.57893	0.0279	downregulated	1	1.18376	0.3061	upregulated	1	0.399933	0.6704	downregulated	1	0.181013	0.8344	upregulated	2	2.7626	0.0631
regulation of nucleocytoplasmic transport	GO	4 out of 7	4.56909	upregulated	5	1.20016	0.3011	upregulated	6	2.60057	0.0742	downregulated	7	0.918035	0.3993	downregulated	7	1.79677	0.1658	upregulated	16	3.34096	0.0354	downregulated	8	0.287262	0.7503	upregulated	13	2.60131	0.0742
negative regulation of transcription regulatory region DNA binding	GO	5 out of 7	4.54138	upregulated	1	0.822563	0.4393	upregulated	1	3.38957	0.0337	downregulated	1	1.62402	0.1971	downregulated	2	1.74217	0.1751	upregulated	3	2.75946	0.0633	upregulated	2	1.25159	0.286	upregulated	2	1.37627	0.2525
nitric oxide biosynthetic process	GO	1 out of 7	4.47516																	upregulated	4	4.47516	0.0114	downregulated	1	3.60977	0.0271	downregulated	1	2.42574	0.0884
regulation of fibroblast apoptotic process	GO	4 out of 7	4.41143	upregulated	3	2.6379	0.0715	downregulated	1	1.32426	0.266	upregulated	1	0.808017	0.4457					upregulated	2	2.74856	0.064	upregulated	1	0.569124	0.566	upregulated	2	3.2154	0.0401
negative regulation of response to wounding	GO	4 out of 7	4.40694	downregulated	3	1.83304	0.1599	upregulated	5	2.17051	0.1141	downregulated	7	3.80779	0.0222	downregulated	5	2.99441	0.0501	upregulated	2	0.767258	0.4643	downregulated	9	1.45131	0.2343	downregulated	5	1.37373	0.2532
bundle of His cell to Purkinje myocyte communication	GO	4 out of 7	4.40223	upregulated	1	2.15716	0.1157					downregulated	1	1.32927	0.2647	downregulated	1	3.00084	0.0497	upregulated	2	1.37553	0.2527					upregulated	1	0.853755	0.4258
aorta development	GO	4 out of 7	4.39816	upregulated	4	1.69752	0.1831	upregulated	1	1.44015	0.2369	downregulated	5	3.96502	0.019	downregulated	3	1.38189	0.2511	downregulated	2	2.47591	0.0841	upregulated	5	2.62208	0.0727	upregulated	6	2.04275	0.1297
GABAergic neuron differentiation	GO	2 out of 7	4.3607									downregulated	1	4.2402	0.0144	downregulated	1	3.22611	0.0397	downregulated	2	3.10561	0.0448	downregulated	1	2.61235	0.0734	upregulated	1	1.79112	0.1668
hepatocyte apoptotic process	GO	3 out of 7	4.34134					upregulated	1	1.07838	0.3401	downregulated	3	2.93777	0.053	downregulated	2	3.01097	0.0492	downregulated	1	1.223	0.2943					upregulated	1	0.693987	0.4996
GATOR2 complex	GO	3 out of 7	4.34008													downregulated	1	1.05818	0.3471	upregulated	3	2.56034	0.0773	downregulated	1	1.31341	0.2689	upregulated	2	2.03497	0.1307
nucleus localization	GO	3 out of 7	4.32621					upregulated	3	4.67268	0.0093	downregulated	7	10.5465	2.6e-05	downregulated	2	2.85821	0.0574	downregulated	4	5.09123	0.0062	downregulated	7	5.72222	0.0033	upregulated	4	6.40761	0.0016
positive regulation of vasculogenesis	GO	3 out of 7	4.32562									downregulated	2	3.51467	0.0298	downregulated	1	2.01406	0.1334	downregulated	2	1.97321	0.139					upregulated	1	0.77011	0.463
beta-catenin-TCF complex assembly	GO	3 out of 7	4.29258	downregulated	2	1.61251	0.1994	upregulated	1	0.445951	0.6402	upregulated	2	1.72885	0.1775	upregulated	1	2.08721	0.124	upregulated	6	5.3658	0.0047	upregulated	2	0.835721	0.4336	upregulated	3	1.57627	0.2067
RNA polymerase II complex binding	GO	4 out of 7	4.25945	upregulated	2	1.23772	0.29					downregulated	4	1.25117	0.2862	downregulated	2	1.2856	0.2765	upregulated	5	2.829	0.0591	downregulated	5	0.925991	0.3961	upregulated	3	1.05739	0.3474
regulation of histone H3-K9 acetylation	GO	4 out of 7	4.25174	downregulated	1	2.83185	0.0589	upregulated	1	1.69576	0.1835	downregulated	2	2.02397	0.1321					upregulated	2	1.1829	0.3064	downregulated	3	1.77025	0.1703	upregulated	1	1.67904	0.1866
negative regulation of ERBB signaling pathway	GO	4 out of 7	4.25157	upregulated	1	0.896464	0.408	downregulated	2	3.5672	0.0282	downregulated	3	1.60449	0.201	downregulated	4	2.1209	0.1199	upregulated	6	2.05988	0.1275	downregulated	5	1.41069	0.244	downregulated	7	2.79375	0.0612
ATP hydrolysis coupled anion transmembrane transport	GO	3 out of 7	4.24897	downregulated	1	2.52805	0.0798	downregulated	1	2.68878	0.068	downregulated	1	1.35801	0.2572					upregulated	2	0.906556	0.4039					downregulated	1	0.543646	0.5806
cellular response to extracellular stimulus	GO	4 out of 7	4.24662	downregulated	4	3.80864	0.0222	upregulated	6	4.15948	0.0156	upregulated	13	6.79454	0.0011	downregulated	15	7.20812	0.0007	downregulated	22	10.5006	2.8e-05	upregulated	14	6.2613	0.0019	upregulated	21	8.42313	0.0002
methyl-CpG binding	GO	3 out of 7	4.24051	upregulated	1	0.463097	0.6293					upregulated	1	1.14594	0.3179					upregulated	3	2.30302	0.1	upregulated	1	0.566493	0.5675	upregulated	4	2.98004	0.0508
regulation of establishment of endothelial barrier	GO	3 out of 7	4.21948	upregulated	1	1.657	0.1907					downregulated	1	1.33362	0.2635					upregulated	4	3.5488	0.0288	downregulated	1	0.286226	0.7511	upregulated	2	1.28028	0.278
endoplasmic reticulum mannose trimming	GO	5 out of 7	4.17698	upregulated	1	0.55854	0.572	upregulated	2	1.90724	0.1485	downregulated	1	0.30586	0.7365	downregulated	2	2.40612	0.0902	upregulated	2	2.46133	0.0853	upregulated	1	0.809397	0.4451	upregulated	1	0.660052	0.5168
replicative senescence	GO	3 out of 7	4.14542					upregulated	1	1.8698	0.1542	downregulated	2	2.74256	0.0644	downregulated	1	2.6801	0.0686	upregulated	3	1.87011	0.1541	downregulated	1	0.772536	0.4618	downregulated	1	0.505009	0.6035
replication fork	GO	1 out of 7	4.13401	upregulated	4	2.38265	0.0923	upregulated	4	2.06507	0.1268	downregulated	4	0.745568	0.4745	downregulated	4	1.67351	0.1876	upregulated	9	4.13401	0.016	upregulated	4	0.737204	0.4784	upregulated	5	2.08968	0.1237
regulation of cellular response to insulin stimulus	GO	3 out of 7	4.09431	downregulated	6	5.91985	0.0027	downregulated	1	0.248565	0.7799	upregulated	1	0.118467	0.8883					upregulated	13	3.29524	0.0371	downregulated	10	2.42657	0.0883	downregulated	9	2.82431	0.0593
fibrillar collagen trimer	GO	1 out of 7	4.08838	downregulated	1	1.24735	0.2873									downregulated	1	0.803404	0.4478	upregulated	2	4.08838	0.0168	downregulated	1	0.309092	0.7341	upregulated	1	0.279884	0.7559
pyrimidine nucleotide-sugar transmembrane transport	GO	4 out of 7	4.06822	downregulated	1	1.94015	0.1437	upregulated	1	1.9674	0.1398	downregulated	1	2.08726	0.124	downregulated	1	1.96841	0.1397	upregulated	1	1.39525	0.2478	downregulated	1	0.611378	0.5426	downregulated	1	0.744084	0.4752
steroid hydroxylase activity	GO	3 out of 7	4.05169									downregulated	1	0.772558	0.4618					downregulated	1	0.679554	0.5068	upregulated	3	2.40202	0.0905	upregulated	2	1.55667	0.2108
phosphatidylethanolamine acyl-chain remodeling	GO	4 out of 7	4.04235					downregulated	1	1.13743	0.3206	downregulated	1	1.21764	0.2959					downregulated	3	2.03898	0.1302	upregulated	1	1.91101	0.1479	upregulated	2	1.81525	0.1628
nucleotide transmembrane transport	GO	4 out of 7	3.97981	downregulated	1	1.22612	0.2934	downregulated	2	5.04983	0.0064	upregulated	1	1.04543	0.3515	downregulated	1	1.2478	0.2871	upregulated	2	0.628109	0.5336	downregulated	3	1.54726	0.2128	downregulated	3	1.57936	0.2061
TORC1 signaling	GO	4 out of 7	3.97646	downregulated	1	1.44336	0.2361					downregulated	1	1.88815	0.1514	downregulated	1	1.22357	0.2942	downregulated	1	0.775315	0.4606	downregulated	1	0.642933	0.5257	upregulated	1	0.839627	0.4319
histone H3-K9 modification	GO	3 out of 7	3.97569	upregulated	2	2.34066	0.0963	upregulated	1	1.20028	0.3011					downregulated	1	1.14121	0.3194	upregulated	4	4.79509	0.0083					upregulated	2	1.58032	0.2059
flavin adenine dinucleotide binding	GO	4 out of 7	3.96719	downregulated	1	0.387986	0.6784	downregulated	3	4.72071	0.0089	downregulated	5	1.68509	0.1854	downregulated	3	3.2816	0.0376	downregulated	8	4.40904	0.0122	downregulated	8	0.998091	0.3686	downregulated	6	0.701069	0.4961
low-density lipoprotein particle binding	GO	4 out of 7	3.94579									upregulated	1	5.04715	0.0064	downregulated	2	3.55407	0.0286	upregulated	3	2.63373	0.0718	upregulated	1	0.428416	0.6515	upregulated	1	2.37671	0.0929
chemical homeostasis within a tissue	GO	2 out of 7	3.93117	downregulated	1	4.59911	0.0101					upregulated	1	1.95545	0.1415					upregulated	2	1.77533	0.1694	downregulated	1	0.487819	0.614
regulation of vasculogenesis	GO	4 out of 7	3.89195	upregulated	1	1.04409	0.352					downregulated	2	2.88317	0.056	downregulated	1	1.74171	0.1752	downregulated	2	1.68302	0.1858	upregulated	1	1.43811	0.2374	upregulated	1	0.556076	0.5735
steroid biosynthetic process	GO	2 out of 7	3.86365	upregulated	4	0.613946	0.5412	upregulated	6	2.57115	0.0764	downregulated	9	3.87099	0.0208	downregulated	11	8.18518	0.0003	downregulated	12	5.00743	0.0067	downregulated	18	6.67203	0.0013	downregulated	21	7.90967	0.0004
positive regulation of DNA-dependent DNA replication	GO	3 out of 7	3.84423					downregulated	1	2.30901	0.0994									upregulated	1	0.281965	0.7543	upregulated	1	1.25326	0.2856
telomere maintenance via telomere trimming	GO	2 out of 7	3.79863									downregulated	1	2.33505	0.0968					upregulated	2	2.27066	0.1032					downregulated	1	0.807075	0.4462
t-circle formation	GO	2 out of 7	3.79863									downregulated	1	2.33505	0.0968					upregulated	2	2.27066	0.1032					downregulated	1	0.807075	0.4462
nail development	GO	3 out of 7	3.79575	downregulated	1	2.65338	0.0704													upregulated	1	1.22207	0.2946	downregulated	1	1.19846	0.3017	upregulated	1	1.11877	0.3267
immunoglobulin complex, circulating	GO	2 out of 7	3.78877	downregulated	2	3.49595	0.0303																	upregulated	1	0.292817	0.7462
adhesion of symbiont to host cell	GO	1 out of 7	3.78603	downregulated	2	3.78603	0.0227
transcription elongation factor complex	GO	5 out of 7	3.77287	downregulated	1	0.471111	0.6243	downregulated	2	1.77355	0.1697	downregulated	2	0.163145	0.8495	downregulated	5	2.57989	0.0758	downregulated	4	1.50951	0.221	downregulated	9	1.65104	0.1919	upregulated	4	1.94573	0.1429
DNA repair complex	GO	3 out of 7	3.76557	upregulated	1	0.472687	0.6233	upregulated	3	3.30841	0.0366	downregulated	6	5.78214	0.0031	downregulated	3	2.6025	0.0741	upregulated	5	2.58623	0.0753	downregulated	7	1.83448	0.1597	downregulated	6	1.58972	0.204
vitamin metabolic process	GO	3 out of 7	3.72591	upregulated	2	0.135429	0.8733	downregulated	3	1.84122	0.1586	downregulated	6	3.07828	0.046	upregulated	3	2.67273	0.0691	upregulated	11	1.61456	0.199	upregulated	10	3.75636	0.0234	upregulated	6	1.46461	0.2312
telomerase holoenzyme complex	GO	1 out of 7	3.6215	upregulated	2	1.95552	0.1415	upregulated	2	2.01679	0.1331	downregulated	2	1.03908	0.3538	downregulated	1	1.92653	0.1457	upregulated	4	3.6215	0.0267	upregulated	2	3.00339	0.0496	downregulated	1	0.872193	0.418
regulation of neuromuscular junction development	GO	2 out of 7	3.60829					upregulated	1	2.42014	0.0889									upregulated	2	3.38021	0.034	upregulated	2	2.56933	0.0766	upregulated	1	2.64822	0.0708
regulation of dendritic cell differentiation	GO	3 out of 7	3.5963									downregulated	1	1.0102	0.3641					upregulated	2	1.3025	0.2719					upregulated	1	1.2836	0.277
roof of mouth development	GO	4 out of 7	3.57999	upregulated	5	3.24736	0.0389					upregulated	7	4.05233	0.0174	downregulated	2	0.94497	0.3887	upregulated	13	4.93673	0.0072	upregulated	5	0.508265	0.6015	upregulated	8	1.24235	0.2887
regulation of double-strand break repair	GO	4 out of 7	3.56746	upregulated	4	0.921399	0.398	upregulated	3	1.95667	0.1413	upregulated	3	1.39102	0.2488	downregulated	4	1.9779	0.1384	upregulated	8	3.88806	0.0205	upregulated	4	0.954058	0.3852	upregulated	6	1.01652	0.3619
regulation of myoblast fusion	GO	4 out of 7	3.56093					upregulated	2	1.49955	0.2232	downregulated	1	1.62755	0.1964	downregulated	1	2.69396	0.0676	downregulated	3	1.49931	0.2233	upregulated	1	0.273766	0.7605	upregulated	2	1.96451	0.1402
negative regulation of TORC1 signaling	GO	5 out of 7	3.55252	upregulated	2	4.08622	0.0168	upregulated	1	1.89863	0.1498	downregulated	1	1.86731	0.1545	downregulated	2	3.17134	0.0419	upregulated	4	3.06809	0.0465	upregulated	1	0.779996	0.4584	upregulated	1	0.650635	0.5217
phosphatidylcholine acyl-chain remodeling	GO	4 out of 7	3.54442					downregulated	1	1.05205	0.3492	downregulated	1	1.13054	0.3229	downregulated	1	0.721344	0.4861	downregulated	3	1.8142	0.163	upregulated	1	1.82926	0.1605	upregulated	2	1.67748	0.1868
neural tube development	GO	4 out of 7	3.54113	upregulated	6	1.15341	0.3156	upregulated	3	2.46993	0.0846	downregulated	11	4.14709	0.0158	downregulated	4	0.549923	0.577	downregulated	11	3.04825	0.0474	upregulated	8	1.88766	0.1514	upregulated	19	3.62806	0.0266
RNA phosphodiester bond hydrolysis, exonucleolytic	GO	4 out of 7	3.53329	upregulated	4	2.58724	0.0752	upregulated	5	5.4251	0.0044	downregulated	4	1.08002	0.3396	downregulated	3	1.92153	0.1464	upregulated	7	4.44586	0.0117	upregulated	1	1.07239	0.3422	upregulated	7	4.10584	0.0165
collagen-activated tyrosine kinase receptor signaling pathway	GO	2 out of 7	3.52662									downregulated	2	3.62197	0.0267	downregulated	1	3.86049	0.0211					downregulated	1	1.61484	0.1989	downregulated	1	2.34101	0.0962
regulation of lymphocyte migration	GO	2 out of 7	3.52509									downregulated	5	2.04879	0.1289	downregulated	3	3.09677	0.0452	downregulated	4	1.35145	0.2589	downregulated	1	0.164753	0.8481	downregulated	2	0.104262	0.901
negative regulation of double-strand break repair	GO	5 out of 7	3.50107	upregulated	1	0.339362	0.7122					downregulated	2	0.882873	0.4136	downregulated	2	1.57286	0.2075	upregulated	2	0.482996	0.6169	upregulated	1	0.598271	0.5498	upregulated	1	0.303433	0.7383
mitotic chromosome condensation	GO	2 out of 7	3.4908	upregulated	1	0.79293	0.4525	upregulated	2	3.42924	0.0324	downregulated	3	2.45105	0.0862					upregulated	5	5.26192	0.0052	upregulated	2	2.90038	0.055	upregulated	2	1.50549	0.2219
oxidoreductase activity, acting on peroxide as acceptor	GO	4 out of 7	3.47993	downregulated	1	0.718808	0.4873	downregulated	1	1.16766	0.3111	downregulated	4	6.83376	0.0011	downregulated	3	4.02889	0.0178	downregulated	5	8.11849	0.0003	downregulated	2	1.24238	0.2887	upregulated	3	1.25933	0.2838
cytoplasmic side of membrane	GO	3 out of 7	3.4749	upregulated	11	7.29572	0.0007	upregulated	3	1.02295	0.3595	downregulated	14	6.04314	0.0024	upregulated	3	4.66426	0.0094	upregulated	17	7.17248	0.0008	downregulated	28	8.46197	0.0002	upregulated	23	10.6812	2.3e-05
lipoprotein particle	GO	4 out of 7	3.43806					upregulated	2	1.307	0.2706	downregulated	1	0.139817	0.8695	downregulated	1	3.01773	0.0489	downregulated	1	0.880761	0.4145	upregulated	2	1.11618	0.3275	upregulated	2	1.35209	0.2587
extracellular matrix structural constituent conferring compression resistance	GO	4 out of 7	3.43173	upregulated	1	1.11421	0.3282					downregulated	1	0.484572	0.616					upregulated	2	1.8944	0.1504	upregulated	2	1.49874	0.2234	upregulated	1	0.668221	0.5126
negative regulation of intrinsic apoptotic signaling pathway by p53 class mediator	GO	3 out of 7	3.42866	upregulated	3	2.25201	0.1052	upregulated	3	3.62434	0.0267	downregulated	1	2.60358	0.074	downregulated	3	6.37085	0.0017	upregulated	2	0.929616	0.3947	downregulated	1	0.286432	0.7509	downregulated	1	0.312617	0.7315
regulation of ruffle assembly	GO	5 out of 7	3.39416	downregulated	1	1.42172	0.2413	upregulated	2	7.05354	0.0009	downregulated	4	2.49868	0.0822	downregulated	3	3.8146	0.022	upregulated	3	1.88111	0.1524	downregulated	5	2.39924	0.0908	upregulated	4	3.23083	0.0395
CD40 receptor complex	GO	3 out of 7	3.38143	upregulated	1	1.23234	0.2916					upregulated	1	2.16087	0.1152	downregulated	2	3.14357	0.0431	upregulated	2	1.4402	0.2369	downregulated	1	0.548714	0.5777	upregulated	1	0.578709	0.5606
azurophil granule lumen	GO	2 out of 7	3.34462	upregulated	1	0.234034	0.7913	upregulated	6	2.72787	0.0654	downregulated	13	7.56765	0.0005	downregulated	9	8.97239	0.0001	downregulated	10	6.75689	0.0012	downregulated	14	3.47663	0.0309	downregulated	9	2.27782	0.1025
regulation of actin filament organization	GO	3 out of 7	3.31528	upregulated	15	3.83809	0.0215	upregulated	12	4.93548	0.0072	downregulated	23	5.4434	0.0043	downregulated	10	5.45805	0.0043	downregulated	19	2.77124	0.0626	downregulated	36	3.9253	0.0197	upregulated	25	7.88394	0.0004
regulation of oogenesis	GO	3 out of 7	3.27915									downregulated	3	3.4773	0.0309	upregulated	1	2.40584	0.0902					upregulated	1	1.28492	0.2767	upregulated	1	0.922768	0.3974
cytokine biosynthetic process	GO	3 out of 7	3.27727									downregulated	1	0.955055	0.3848					upregulated	2	1.57818	0.2064					upregulated	1	0.74404	0.4752
detection of light stimulus	GO	4 out of 7	3.2746	downregulated	2	2.35436	0.095	downregulated	1	1.58193	0.2056	downregulated	3	2.17889	0.1132	downregulated	2	2.02729	0.1317	downregulated	2	0.186091	0.8302	downregulated	6	2.35721	0.0947	downregulated	7	2.32457	0.0978
positive regulation of autophagy of mitochondrion	GO	4 out of 7	3.26606	downregulated	1	1.42045	0.2416					downregulated	3	3.30806	0.0366	downregulated	1	0.91968	0.3986	downregulated	3	3.61802	0.0268	upregulated	1	1.23589	0.2906	downregulated	1	0.948921	0.3872
positive regulation of potassium ion transmembrane transport	GO	4 out of 7	3.23459									downregulated	2	1.56384	0.2093	downregulated	1	0.600513	0.5485	upregulated	1	1.84461	0.1581	upregulated	2	1.91106	0.1479	downregulated	5	2.68543	0.0682
transcriptional activator activity, RNA polymerase II distal enhancer sequence-specific DNA binding	GO	4 out of 7	3.2269	upregulated	2	4.32718	0.0132					downregulated	3	1.80602	0.1643	downregulated	3	2.44945	0.0863	upregulated	3	0.988872	0.372	upregulated	5	4.26563	0.014	downregulated	1	1.9559	0.1414
extracellular matrix structural constituent conferring tensile strength	GO	3 out of 7	3.21548					downregulated	1	1.72278	0.1786	downregulated	3	2.46395	0.0851					downregulated	3	1.87598	0.1532	downregulated	1	0.968822	0.3795	upregulated	1	1.87355	0.1536
response to antineoplastic agent	GO	4 out of 7	3.20954	downregulated	2	4.69172	0.0092	upregulated	6	4.87229	0.0077	downregulated	8	2.70763	0.0667	downregulated	5	2.66368	0.0697	downregulated	11	5.92046	0.0027	downregulated	11	2.74851	0.064	upregulated	13	6.68777	0.0012
negative regulation of cellular response to transforming growth factor beta stimulus	GO	4 out of 7	3.20892	upregulated	1	2.56128	0.0772	upregulated	4	4.2282	0.0146	upregulated	6	5.93143	0.0027	downregulated	3	1.1373	0.3207	upregulated	10	4.27593	0.0139	upregulated	3	5.25831	0.0052	upregulated	6	5.25831	0.0052
signaling adaptor activity	GO	3 out of 7	3.19664	upregulated	4	2.28876	0.1014	upregulated	2	0.361599	0.6966	downregulated	8	3.79447	0.0225	downregulated	3	0.463561	0.629	downregulated	7	2.45292	0.086	upregulated	5	2.3754	0.093	upregulated	12	4.04188	0.0176
muscle cell proliferation	GO	4 out of 7	3.189	downregulated	1	1.01683	0.3617					downregulated	1	0.606957	0.545	downregulated	1	1.12694	0.324	upregulated	4	5.02756	0.0066	downregulated	4	2.86767	0.0568	downregulated	4	1.72161	0.1788
NADP binding	GO	3 out of 7	3.14819	downregulated	2	1.66225	0.1897	upregulated	3	2.43311	0.0878	downregulated	9	7.21059	0.0007	downregulated	7	8.94281	0.0001	downregulated	6	5.31362	0.0049	downregulated	9	4.61438	0.0099	downregulated	6	2.30634	0.0996
coagulation	GO	4 out of 7	3.10329	downregulated	6	0.797957	0.4502	upregulated	13	5.56025	0.0038	downregulated	24	4.39588	0.0123	downregulated	14	3.86162	0.021	downregulated	17	2.82999	0.059	downregulated	27	3.28711	0.0374	upregulated	22	5.72519	0.0033
hemostasis	GO	4 out of 7	3.09433	downregulated	6	0.78585	0.4557	upregulated	13	5.53988	0.0039	downregulated	24	4.36445	0.0127	downregulated	14	3.76878	0.0231	downregulated	17	2.80505	0.0605	downregulated	27	3.17036	0.042	upregulated	22	5.69054	0.0034
positive regulation of autophagy of mitochondrion in response to mitochondrial depolarization	GO	4 out of 7	3.09293	downregulated	1	1.75978	0.1721					downregulated	2	1.59946	0.202	downregulated	1	1.22625	0.2934	downregulated	2	3.07954	0.046	upregulated	1	1.58698	0.2045	downregulated	1	1.30372	0.2715
MCM complex	GO	5 out of 7	3.08677					upregulated	5	13.1559	1.9e-06	downregulated	2	3.36622	0.0345	downregulated	3	5.77336	0.0031	upregulated	1	1.21677	0.2962	upregulated	1	1.3805	0.2515	upregulated	2	4.50582	0.011
blood coagulation	GO	4 out of 7	3.08181	downregulated	6	0.8	0.4493	upregulated	13	5.57395	0.0038	downregulated	24	4.40117	0.0123	downregulated	14	3.87733	0.0207	downregulated	17	2.8468	0.058	downregulated	27	3.30696	0.0366	upregulated	22	5.73102	0.0032
ficolin-1-rich granule lumen	GO	4 out of 7	3.07395	downregulated	1	1.59193	0.2035	upregulated	4	1.13804	0.3204	downregulated	10	4.91469	0.0073	downregulated	9	7.12309	0.0008	downregulated	17	9.12838	0.0001	downregulated	20	6.06427	0.0023	upregulated	10	4.6369	0.0097
regulation of osteoclast development	GO	1 out of 7	3.05892													downregulated	1	4.97886	0.0069					downregulated	1	0.283802	0.7529	downregulated	1	1.63613	0.1947
modification of morphology or physiology of other organism	GO	4 out of 7	3.05871	downregulated	4	2.10987	0.1213	upregulated	5	3.7707	0.023	downregulated	5	0.920971	0.3981	downregulated	2	0.232238	0.7928	downregulated	10	1.95226	0.142	downregulated	13	1.46161	0.2319	upregulated	14	5.51858	0.004
mammary gland lobule development	GO	2 out of 7	3.05307	downregulated	1	3.82826	0.0217													upregulated	1	0.403296	0.6681	downregulated	3	0.668387	0.5125	downregulated	2	0.510092	0.6004
RNA phosphodiester bond hydrolysis, endonucleolytic	GO	4 out of 7	3.0387	upregulated	3	1.36276	0.256	upregulated	8	12.3579	4.3e-06	downregulated	6	5.22201	0.0054	downregulated	4	5.59698	0.0037	downregulated	2	0.111505	0.8945	upregulated	2	1.35807	0.2572	upregulated	8	4.69378	0.0092
positive regulation of establishment of protein localization to telomere	GO	2 out of 7	3.03327																	upregulated	2	1.9145	0.1474					upregulated	1	1.11877	0.3267
positive regulation of myoblast fusion	GO	3 out of 7	3.03043					upregulated	1	0.743832	0.4753	downregulated	1	1.92744	0.1455	downregulated	1	3.01385	0.0491	downregulated	3	2.18805	0.1121					upregulated	1	1.02102	0.3602
nuclear inner membrane	GO	1 out of 7	3.01569	upregulated	3	0.977608	0.3762	upregulated	3	1.98119	0.1379	downregulated	4	2.68043	0.0685	downregulated	2	1.55495	0.2112	upregulated	6	3.01569	0.049	upregulated	3	2.63234	0.0719	upregulated	3	3.14566	0.043
protein membrane anchor	GO	4 out of 7	2.97227					upregulated	1	2.04582	0.1293	downregulated	1	1.63445	0.1951	downregulated	1	1.10736	0.3304	downregulated	2	2.55245	0.0779	upregulated	2	2.50114	0.082	upregulated	2	2.32759	0.0975
mRNA cleavage factor complex	GO	1 out of 7	2.93884	upregulated	2	1.27409	0.2797	upregulated	1	0.684512	0.5043	downregulated	3	1.50301	0.2225	downregulated	1	1.13293	0.3221	upregulated	4	2.93884	0.0529	upregulated	1	0.976921	0.3765	downregulated	2	0.546341	0.5791
negative regulation of neurogenesis	GO	3 out of 7	2.92383	downregulated	11	4.18434	0.0152	upregulated	8	4.65412	0.0095	downregulated	37	25.6023	7.6e-12	downregulated	24	8.63094	0.0002	downregulated	22	5.2141	0.0054	downregulated	50	13.5835	1.3e-06	downregulated	41	12.0421	5.9e-06
oxidoreductase activity, acting on paired donors, with incorporation or reduction of molecular oxygen, reduced flavin or flavoprotein as one donor, and incorporation of one atom of oxygen	GO	4 out of 7	2.91594	downregulated	1	1.11047	0.3294					downregulated	1	0.772558	0.4618					downregulated	1	0.679554	0.5068	upregulated	2	1.18114	0.3069	upregulated	1	0.531323	0.5878
negative regulation of cell motility	GO	4 out of 7	2.88936	upregulated	15	4.18284	0.0153	upregulated	9	3.27336	0.0379	downregulated	27	4.33533	0.0131	downregulated	14	6.03488	0.0024	downregulated	29	9.23971	9.7e-05	upregulated	19	4.68335	0.0092	upregulated	26	4.5317	0.0108
steroid binding	GO	1 out of 7	2.8828	upregulated	2	4.77407	0.0084	upregulated	5	2.96017	0.0518	downregulated	6	1.77801	0.169	downregulated	6	5.58034	0.0038	upregulated	11	2.8828	0.056	upregulated	10	5.57632	0.0038	downregulated	13	1.65194	0.1917
sulfate transmembrane transport	GO	3 out of 7	2.85669	upregulated	1	1.15269	0.3158					downregulated	2	2.66613	0.0695					upregulated	1	0.578847	0.5605	upregulated	1	0.764403	0.4656
TRIF-dependent toll-like receptor signaling pathway	GO	5 out of 7	2.85575					upregulated	3	7.6212	0.0005	downregulated	2	1.63946	0.1941	downregulated	2	2.36467	0.094	upregulated	5	5.23428	0.0053	upregulated	1	0.536404	0.5848	upregulated	2	0.702132	0.4955
response to extracellular stimulus	GO	3 out of 7	2.83846	downregulated	9	3.81619	0.022	upregulated	17	5.9844	0.0025	upregulated	24	7.16824	0.0008	downregulated	27	10.2238	3.6e-05	downregulated	40	8.56625	0.0002	downregulated	59	5.38197	0.0046	upregulated	41	10.5173	2.7e-05
pteridine-containing compound metabolic process	GO	4 out of 7	2.78333	downregulated	2	1.87255	0.1537	upregulated	3	5.17894	0.0056	downregulated	6	2.72442	0.0656	downregulated	2	1.20841	0.2987	upregulated	8	6.45856	0.0016	upregulated	4	4.34049	0.013	downregulated	3	2.1836	0.1126
cellular biogenic amine metabolic process	GO	2 out of 7	2.77516	downregulated	3	4.83697	0.0079	upregulated	2	0.630243	0.5325	upregulated	4	4.48458	0.0113	downregulated	3	2.74959	0.064	downregulated	4	4.18116	0.0153	upregulated	5	5.36502	0.0047	upregulated	7	4.1804	0.0153
protein alpha-1,2-demannosylation	GO	3 out of 7	2.76285	upregulated	1	0.410446	0.6634	upregulated	2	1.52494	0.2176	downregulated	1	0.199337	0.8193	downregulated	2	1.99377	0.1362	upregulated	3	3.40513	0.0332	downregulated	1	0.9	0.4066	downregulated	1	0.854624	0.4254
cartilage development	GO	5 out of 7	2.71211	downregulated	8	2.39708	0.091	upregulated	5	3.60208	0.0273	downregulated	7	0.972632	0.3781	downregulated	5	3.43283	0.0323	downregulated	8	2.20148	0.1106	upregulated	5	0.84133	0.4311	upregulated	11	0.871806	0.4182
regulation of cytokine production involved in inflammatory response	GO	3 out of 7	2.68024	downregulated	3	4.01114	0.0181	upregulated	2	3.15378	0.0427									upregulated	1	1.12191	0.3257	downregulated	1	0.0359784	0.9647	upregulated	2	0.736952	0.4786
reactive oxygen species biosynthetic process	GO	3 out of 7	2.6503									downregulated	2	1.59674	0.2026	downregulated	2	3.35094	0.0351	upregulated	4	2.86744	0.0568	downregulated	2	3.16535	0.0422	downregulated	1	1.99947	0.1354
cell death in response to oxidative stress	GO	3 out of 7	2.64865	downregulated	1	0.950045	0.3867	downregulated	1	1.88072	0.1525	upregulated	1	0.969023	0.3795					downregulated	1	0.309764	0.7336	downregulated	1	0.254669	0.7752	upregulated	2	1.35134	0.2589
embryonic appendage morphogenesis	GO	4 out of 7	2.64224	downregulated	6	1.76344	0.1715	downregulated	2	2.22652	0.1079	downregulated	7	2.86805	0.0568	upregulated	2	1.1688	0.3107	downregulated	11	4.75626	0.0086	downregulated	12	3.39994	0.0334	upregulated	13	5.10923	0.006
nucleus organization	GO	3 out of 7	2.61668	downregulated	2	1.60979	0.1999	upregulated	7	1.29946	0.2727	downregulated	10	0.708888	0.4922	downregulated	10	3.26638	0.0381	downregulated	11	1.66893	0.1884	downregulated	19	2.01245	0.1337	upregulated	10	4.52915	0.0108
purine-containing compound transmembrane transport	GO	4 out of 7	2.59594	downregulated	1	1.50241	0.2226					downregulated	1	1.17981	0.3073	downregulated	1	1.52519	0.2176	upregulated	1	0.487107	0.6144	downregulated	2	1.03873	0.3539	downregulated	2	1.05985	0.3465
nuclear envelope organization	GO	3 out of 7	2.58427					upregulated	3	1.62095	0.1977	downregulated	5	1.34418	0.2608	downregulated	1	0.222038	0.8009	upregulated	9	2.639	0.0714	upregulated	4	2.78308	0.0618	downregulated	9	2.79126	0.0613
ovulation	GO	3 out of 7	2.56772									upregulated	1	2.71818	0.066					upregulated	2	1.87011	0.1541	upregulated	1	1.74996	0.1738	upregulated	2	1.66583	0.189
somatic diversification of immunoglobulins	GO	4 out of 7	2.56363	downregulated	1	0.583245	0.5581					downregulated	2	1.41023	0.2441	downregulated	3	2.30202	0.1001	upregulated	5	1.13907	0.3201	upregulated	1	0.643955	0.5252	downregulated	7	2.37583	0.0929
mRNA cleavage involved in mRNA processing	GO	3 out of 7	2.53083					upregulated	1	1.2631	0.2828	upregulated	1	1.68158	0.1861	downregulated	1	1.78298	0.1681	upregulated	1	1.49514	0.2242	upregulated	1	1.59275	0.2034	downregulated	1	1.07693	0.3406
positive regulation of protein localization to chromosome, telomeric region	GO	2 out of 7	2.50691																	upregulated	2	1.56554	0.209					upregulated	1	0.941368	0.3901
positive regulation of oxidative stress-induced cell death	GO	5 out of 7	2.49737	downregulated	2	2.97084	0.0513	upregulated	1	3.90022	0.0202	downregulated	1	0.217841	0.8043					upregulated	1	0.616482	0.5398	upregulated	1	1.39843	0.247	upregulated	3	1.19399	0.303
neuropilin binding	GO	3 out of 7	2.49475	upregulated	1	1.74968	0.1738	upregulated	1	3.09808	0.0451	downregulated	5	8.70806	0.0002	downregulated	1	1.06907	0.3433	downregulated	2	2.77309	0.0625	downregulated	3	2.43633	0.0875	upregulated	3	2.7748	0.0624
carbohydrate transport	GO	3 out of 7	2.47515	upregulated	3	1.61964	0.198	downregulated	2	1.63165	0.1956	downregulated	3	3.01104	0.0492	downregulated	4	5.26983	0.0051	upregulated	6	1.8485	0.1575	downregulated	9	2.90887	0.0545	downregulated	8	2.90887	0.0545
anatomical structure regression	GO	1 out of 7	2.47213					upregulated	1	1.56136	0.2099									upregulated	3	4.03349	0.0177
positive regulation of cellular response to oxidative stress	GO	5 out of 7	2.45461	downregulated	2	2.9061	0.0547	upregulated	1	3.77638	0.0229	downregulated	1	0.203668	0.8157					upregulated	1	0.592602	0.5529	upregulated	1	1.36586	0.2552	upregulated	3	1.16275	0.3126
regulation of trophoblast cell migration	GO	4 out of 7	2.44647	upregulated	1	2.28655	0.1016					downregulated	1	1.54613	0.2131					upregulated	1	0.623482	0.5361	upregulated	1	0.749737	0.4725	upregulated	1	1.81367	0.1631
positive regulation of response to oxidative stress	GO	5 out of 7	2.40544	downregulated	2	2.84395	0.0582	upregulated	1	3.66648	0.0256	downregulated	1	0.190507	0.8265					upregulated	1	0.569931	0.5656	upregulated	1	1.33466	0.2632	upregulated	3	1.13287	0.3221
transcription corepressor binding	GO	5 out of 7	2.39475	upregulated	1	0.967542	0.38	upregulated	3	3.19309	0.041	downregulated	1	0.276478	0.7585	downregulated	1	0.757831	0.4687	upregulated	3	2.73844	0.0647	upregulated	1	0.953825	0.3853	upregulated	2	1.82881	0.1606
digestive tract development	GO	4 out of 7	2.37526	downregulated	5	2.40535	0.0902	upregulated	3	4.65388	0.0095	downregulated	9	1.70586	0.1816	upregulated	1	1.18588	0.3055	upregulated	9	4.0674	0.0171	downregulated	8	2.07684	0.1253	upregulated	11	2.11325	0.1208
endoplasmic reticulum quality control compartment	GO	4 out of 7	2.36914	upregulated	1	0.335616	0.7149	upregulated	3	2.52381	0.0802	downregulated	1	0.149883	0.8608	downregulated	2	1.76939	0.1704	upregulated	4	2.96535	0.0515	upregulated	2	0.785421	0.4559	downregulated	2	0.441475	0.6431
odontogenesis	GO	4 out of 7	2.36471	downregulated	4	1.73558	0.1763	upregulated	1	1.34714	0.26	downregulated	7	1.82988	0.1604	downregulated	3	0.83417	0.4342	downregulated	6	1.43561	0.238	downregulated	11	3.15165	0.0428	upregulated	13	3.89947	0.0203
tissue remodeling	GO	4 out of 7	2.36259	upregulated	4	3.13071	0.0437	upregulated	3	1.67887	0.1866	downregulated	5	2.62631	0.0723	downregulated	4	2.57181	0.0764	upregulated	6	2.58726	0.0752	downregulated	5	0.972699	0.3781	upregulated	5	0.359478	0.698
positive regulation of transcription from RNA polymerase II promoter in response to endoplasmic reticulum stress	GO	3 out of 7	2.36059					upregulated	1	1.88837	0.1513	upregulated	1	2.83852	0.0585	downregulated	1	1.2375	0.2901	downregulated	1	0.897641	0.4075	upregulated	1	1.65747	0.1906	upregulated	2	5.09015	0.0062
modulation by virus of host morphology or physiology	GO	5 out of 7	2.29703	downregulated	3	4.27435	0.0139	upregulated	2	5.15002	0.0058	downregulated	1	0.908462	0.4031	downregulated	1	0.660561	0.5166	upregulated	4	3.21667	0.0401	upregulated	4	2.09434	0.1232	downregulated	8	3.70734	0.0245
GTPase inhibitor activity	GO	1 out of 7	2.27225									downregulated	2	2.19231	0.1117	downregulated	2	2.68101	0.0685	upregulated	2	2.27225	0.1031	upregulated	2	3.16785	0.0421	upregulated	3	4.8484	0.0078
folic acid binding	GO	1 out of 7	2.27217	downregulated	1	1.24593	0.2877	upregulated	2	7.47718	0.0006	downregulated	2	1.37255	0.2535					upregulated	2	2.27217	0.1031					upregulated	1	0.468954	0.6257
regulation of postsynaptic membrane organization	GO	2 out of 7	2.265					upregulated	2	3.98015	0.0187					upregulated	1	2.78381	0.0618	upregulated	5	4.84433	0.0079	downregulated	2	2.31494	0.0988	upregulated	2	2.51942	0.0805
DNA catabolic process	GO	1 out of 7	2.23056	upregulated	1	0.258468	0.7722	upregulated	2	3.58979	0.0276	downregulated	3	1.01607	0.362	downregulated	1	0.427207	0.6523	upregulated	6	2.23056	0.1075	upregulated	1	0.250125	0.7787	upregulated	4	1.47487	0.2288
cellular response to interleukin-7	GO	3 out of 7	2.23037	upregulated	2	2.81426	0.0599					downregulated	3	2.16864	0.1143	downregulated	1	1.95291	0.1419	upregulated	3	2.51675	0.0807	downregulated	3	2.81202	0.0601	downregulated	2	1.59591	0.2027
positive regulation of autophagosome assembly	GO	2 out of 7	2.21599	upregulated	1	0.769049	0.4635	upregulated	1	1.62709	0.1965	downregulated	1	3.55814	0.0285	downregulated	3	6.30589	0.0018	downregulated	2	2.31116	0.0991	downregulated	3	3.06726	0.0465	downregulated	3	2.94075	0.0528
antioxidant activity	GO	4 out of 7	2.21577	downregulated	2	1.29228	0.2746	upregulated	4	2.29157	0.1011	downregulated	5	6.81861	0.0011	downregulated	3	3.60336	0.0272	downregulated	5	6.8586	0.0011	downregulated	4	1.48966	0.2255	upregulated	4	1.14134	0.3194
response to potassium ion	GO	3 out of 7	2.20339																	upregulated	1	0.776814	0.4599	upregulated	1	0.893619	0.4092	upregulated	1	0.532958	0.5869
chloride ion binding	GO	3 out of 7	2.2031									upregulated	1	1.75797	0.1724	downregulated	2	2.80038	0.0608	upregulated	1	0.396244	0.6728	upregulated	1	1.11003	0.3296	downregulated	1	0.34558	0.7078
negative regulation of epithelial cell apoptotic process	GO	4 out of 7	2.20258	downregulated	1	0.479945	0.6188	upregulated	2	0.930471	0.3944	downregulated	2	0.402024	0.669	downregulated	3	3.46657	0.0312	downregulated	3	2.52497	0.0801	downregulated	1	3.69597	0.0248	upregulated	4	2.48048	0.0837
homologous recombination	GO	4 out of 7	2.19958	upregulated	2	0.951561	0.3861	upregulated	3	1.79158	0.1667	downregulated	2	1.34121	0.2615	downregulated	2	2.36823	0.0936	upregulated	5	0.898108	0.4073	upregulated	1	0.335175	0.7152
intramolecular transferase activity	GO	3 out of 7	2.19496	upregulated	1	0.636593	0.5291	downregulated	1	2.4188	0.089	downregulated	2	3.25466	0.0386	downregulated	4	7.76087	0.0004	downregulated	2	3.2444	0.039	downregulated	5	3.9224	0.0198	downregulated	4	3.43598	0.0322
chaperonin-containing T-complex	GO	1 out of 7	2.18333					upregulated	1	3.01678	0.049									upregulated	2	2.18333	0.1127					upregulated	1	1.25345	0.2855
regulation of production of miRNAs involved in gene silencing by miRNA	GO	4 out of 7	2.13859									downregulated	2	0.647742	0.5232	downregulated	1	0.689453	0.5019	upregulated	1	0.542926	0.581	upregulated	1	0.258471	0.7722
regulation of centrosome cycle	GO	4 out of 7	2.13793	upregulated	5	2.84501	0.0581	upregulated	4	3.89559	0.0203	downregulated	7	3.09263	0.0454	downregulated	2	0.526589	0.5906	upregulated	7	5.90906	0.0027	downregulated	10	3.49641	0.0303	upregulated	6	2.84667	0.058
negative regulation of mesenchymal cell apoptotic process	GO	2 out of 7	2.12093	downregulated	1	1.41175	0.2437					downregulated	1	0.709183	0.492
positive regulation of lamellipodium organization	GO	3 out of 7	2.07183	upregulated	1	1.35342	0.2584	downregulated	1	4.123	0.0162	downregulated	5	3.7242	0.0241	downregulated	3	2.64492	0.071	downregulated	2	1.68512	0.1854	downregulated	4	2.57468	0.0762	downregulated	2	2.80707	0.0604
T cell migration	GO	2 out of 7	2.0644																	upregulated	1	0.533208	0.5867					upregulated	2	1.53119	0.2163
negative regulation of extrinsic apoptotic signaling pathway via death domain receptors	GO	5 out of 7	2.05148					upregulated	2	5.3726	0.0046	downregulated	3	1.58553	0.2048	downregulated	2	1.73412	0.1766	upregulated	2	0.202512	0.8167	upregulated	3	1.52429	0.2178	upregulated	4	2.37764	0.0928
SH3/SH2 adaptor activity	GO	1 out of 7	2.02885	upregulated	2	1.65175	0.1917	upregulated	2	0.61461	0.5409	downregulated	5	2.43872	0.0873	downregulated	2	0.72655	0.4836	upregulated	4	2.02885	0.1315	upregulated	3	2.24169	0.1063	upregulated	5	1.75612	0.1727
peptidoglycan binding	GO	1 out of 7	2.0148													downregulated	1	3.99132	0.0185					downregulated	1	0.984192	0.3737	downregulated	1	0.992333	0.3707
U2-type spliceosomal complex	GO	1 out of 7	2.00956	upregulated	2	2.03378	0.1308	upregulated	6	3.96377	0.019	upregulated	2	1.99	0.1367	downregulated	2	0.456419	0.6335	upregulated	7	2.00956	0.134	upregulated	4	0.714584	0.4894	upregulated	8	3.77392	0.023
nuclear transcriptional repressor complex	GO	3 out of 7	2.00632	upregulated	1	0.236641	0.7893	upregulated	2	1.36149	0.2563	downregulated	1	0.644998	0.5247					upregulated	5	2.49657	0.0824	downregulated	3	1.19844	0.3017	upregulated	4	1.66132	0.1899
RNA polymerase III regulatory region DNA binding	GO	2 out of 7	1.99726																	upregulated	1	0.823346	0.439					upregulated	1	1.17392	0.3092
oxidoreductase activity, acting on the CH-CH group of donors	GO	3 out of 7	1.9963	upregulated	3	2.40377	0.0904	upregulated	4	8.20249	0.0003	upregulated	3	2.14042	0.1176	downregulated	4	5.45383	0.0043	upregulated	7	8.44874	0.0002	downregulated	8	2.70552	0.0668	upregulated	9	3.54593	0.0288
mitochondrial small ribosomal subunit	GO	1 out of 7	1.99439	upregulated	2	1.17779	0.308	downregulated	1	1.40404	0.2456	upregulated	1	0.880227	0.4147					upregulated	2	1.99439	0.1361	downregulated	3	1.02497	0.3588	downregulated	3	0.737011	0.4785
nuclear migration	GO	2 out of 7	1.89082					upregulated	3	5.11592	0.006	downregulated	6	9.37531	8.5e-05	downregulated	2	3.03572	0.048	downregulated	4	5.40428	0.0045	downregulated	7	6.27524	0.0019	downregulated	6	6.63429	0.0013
cobalamin binding	GO	2 out of 7	1.86766													downregulated	1	1.83314	0.1599	downregulated	1	1.06196	0.3458	upregulated	1	1.09648	0.334
retromer complex	GO	3 out of 7	1.8668									upregulated	1	2.16252	0.115	downregulated	3	2.79091	0.0614	upregulated	3	1.25071	0.2863	upregulated	1	1.31327	0.2689	downregulated	2	1.32556	0.2657
reciprocal meiotic recombination	GO	3 out of 7	1.86441	upregulated	2	0.951561	0.3861	upregulated	3	1.79158	0.1667	downregulated	2	1.34121	0.2615	downregulated	2	2.36823	0.0936	upregulated	5	0.898108	0.4073	upregulated	1	0.335175	0.7152
negative regulation of long-term synaptic potentiation	GO	3 out of 7	1.86064	upregulated	1	0.841194	0.4312	upregulated	2	4.41087	0.0121	downregulated	1	0.825688	0.4379					upregulated	1	2.50011	0.0821					upregulated	2	3.78691	0.0227
endolysosome membrane	GO	3 out of 7	1.85528					upregulated	1	3.6731	0.0254	downregulated	1	1.1291	0.3233	downregulated	4	9.39934	8.3e-05	upregulated	1	1.24023	0.2893	downregulated	4	4.67895	0.0093	downregulated	2	1.56134	0.2099
connective tissue development	GO	5 out of 7	1.82765	downregulated	9	2.12057	0.12	upregulated	5	3.34669	0.0352	downregulated	9	0.806983	0.4462	downregulated	6	2.96619	0.0515	downregulated	11	2.04765	0.129	upregulated	6	0.688679	0.5022	upregulated	15	0.639557	0.5275
RNA polymerase complex	GO	5 out of 7	1.7995	downregulated	3	0.946758	0.388	upregulated	8	2.96162	0.0517	downregulated	9	1.13105	0.3227	downregulated	9	3.88636	0.0205	downregulated	9	2.7799	0.062	upregulated	5	0.537721	0.5841	upregulated	8	1.03914	0.3538
regulation of double-strand break repair via nonhomologous end joining	GO	4 out of 7	1.77357					upregulated	1	0.747067	0.4738	upregulated	1	1.24784	0.2871	downregulated	1	0.917126	0.3997	upregulated	2	0.587719	0.5556	upregulated	2	1.76898	0.1705	upregulated	1	0.494662	0.6098
site of DNA damage	GO	4 out of 7	1.76188	upregulated	3	0.97078	0.3788	upregulated	3	1.14507	0.3182	downregulated	3	0.311974	0.732	downregulated	5	3.25348	0.0386	upregulated	4	0.200596	0.8182	upregulated	2	0.351458	0.7037	downregulated	4	0.239777	0.7868
photoreceptor disc membrane	GO	2 out of 7	1.75051									downregulated	1	1.14192	0.3192	downregulated	1	1.4898	0.2254	downregulated	1	0.433023	0.6485	downregulated	1	0.448188	0.6388
negative regulation of double-strand break repair via homologous recombination	GO	3 out of 7	1.71404	upregulated	1	0.74698	0.4738					downregulated	2	1.80606	0.1643	downregulated	1	1.127	0.324	upregulated	1	0.412626	0.6619	downregulated	1	0.410897	0.6631	downregulated	1	0.473779	0.6226
phosphatidylinositol-3-phosphate biosynthetic process	GO	3 out of 7	1.70665	upregulated	5	3.07926	0.046	downregulated	2	1.11472	0.328	downregulated	5	7.00247	0.0009	downregulated	3	2.8788	0.0562	downregulated	5	2.11923	0.1201	downregulated	8	1.49814	0.2235	downregulated	9	2.59271	0.0748
oxidoreductase activity, oxidizing metal ions	GO	3 out of 7	1.68741	upregulated	1	1.42298	0.241					downregulated	1	1.00718	0.3652	upregulated	1	2.68796	0.068	downregulated	1	0.481518	0.6178	upregulated	1	2.84763	0.058	upregulated	3	2.42504	0.0885
transcription factor TFIID complex	GO	1 out of 7	1.66695	upregulated	3	2.24306	0.1061	upregulated	2	3.26491	0.0382	upregulated	1	0.778685	0.459	upregulated	1	4.52408	0.0108	upregulated	4	1.66695	0.1888	upregulated	1	0.454413	0.6348	upregulated	1	0.600286	0.5487
extracellular matrix structural constituent	GO	1 out of 7	1.66429	upregulated	5	2.41987	0.0889	upregulated	2	0.485971	0.6151	downregulated	9	0.761768	0.4668	downregulated	4	0.414534	0.6606	upregulated	5	1.66429	0.1893	downregulated	7	0.243149	0.7842	upregulated	6	0.581647	0.559
regulation of anoikis	GO	3 out of 7	1.63508	upregulated	2	3.19872	0.0408	upregulated	3	5.34922	0.0048	upregulated	2	1.60508	0.2009	downregulated	1	0.406437	0.666					upregulated	1	5.17228	0.0057	upregulated	4	6.20939	0.002
regulation of actin cytoskeleton reorganization	GO	3 out of 7	1.60378	downregulated	2	4.5151	0.0109	downregulated	1	4.123	0.0162	downregulated	4	2.62669	0.0723					downregulated	4	3.6067	0.0271	downregulated	6	3.57159	0.0281	downregulated	3	2.48271	0.0835
regulation of protein import	GO	4 out of 7	1.58078	upregulated	4	1.78393	0.168	upregulated	2	1.10517	0.3312	downregulated	3	0.991603	0.371	downregulated	3	1.10745	0.3304	upregulated	5	1.19884	0.3015	downregulated	4	0.237912	0.7883	upregulated	6	1.4099	0.2442
inhibition of cysteine-type endopeptidase activity	GO	2 out of 7	1.57107	upregulated	1	0.801191	0.4488									downregulated	1	1.26608	0.2819	upregulated	2	1.42404	0.2407	downregulated	1	0.317859	0.7277
RNA polymerase III activity	GO	4 out of 7	1.5635	downregulated	1	1.33916	0.2621	upregulated	1	1.34281	0.2611	downregulated	1	1.40975	0.2442					downregulated	2	2.72652	0.0654	upregulated	1	1.50029	0.2231	upregulated	2	1.38364	0.2507
endodermal cell differentiation	GO	2 out of 7	1.55697	upregulated	1	1.58513	0.2049					downregulated	1	2.09144	0.1235	downregulated	2	3.8008	0.0224	downregulated	2	1.04333	0.3523	downregulated	4	0.883721	0.4132	downregulated	2	0.82309	0.4391
regulation of intrinsic apoptotic signaling pathway in response to DNA damage by p53 class mediator	GO	2 out of 7	1.53712	upregulated	2	1.53761	0.2149	upregulated	3	3.89215	0.0204	downregulated	1	2.80772	0.0603	downregulated	3	6.79771	0.0011	downregulated	2	1.37317	0.2533	downregulated	2	1.26538	0.2821
hydrolase activity, acting on carbon-nitrogen (but not peptide) bonds	GO	4 out of 7	1.5339	upregulated	7	3.66738	0.0255	upregulated	7	3.68171	0.0252	downregulated	13	3.33056	0.0358	downregulated	5	1.87621	0.1532	downregulated	14	3.20145	0.0407	upregulated	13	3.72994	0.024	upregulated	15	3.14773	0.0429
negative regulation of amyloid precursor protein catabolic process	GO	2 out of 7	1.52032					upregulated	1	1.07838	0.3401	downregulated	2	1.62926	0.1961					downregulated	1	1.79641	0.1659	downregulated	1	0.514273	0.5979	upregulated	2	3.28012	0.0376
caspase binding	GO	2 out of 7	1.50423					downregulated	1	2.43037	0.088									downregulated	1	1.98477	0.1374	upregulated	1	1.05863	0.3469
multicellular organismal homeostasis	GO	3 out of 7	1.4904	upregulated	11	2.87607	0.0564	upregulated	10	4.35325	0.0129	downregulated	18	4.97685	0.0069	downregulated	12	5.55289	0.0039	downregulated	24	9.62825	6.6e-05	upregulated	16	5.67175	0.0034	upregulated	18	7.81824	0.0004
ubiquitin-like protein ligase activity	GO	4 out of 7	1.48399	upregulated	18	2.60675	0.0738	upregulated	16	4.76766	0.0085	downregulated	19	2.78729	0.0616	downregulated	12	2.36104	0.0943	upregulated	24	2.33103	0.0972	upregulated	17	2.9788	0.0509	downregulated	23	1.59976	0.2019
cytoplasm organization	GO	2 out of 7	1.4583	upregulated	1	1.06693	0.3441					downregulated	1	0.746164	0.4742					upregulated	1	1.77906	0.1688	downregulated	2	0.981546	0.3747	upregulated	2	1.78119	0.1684
positive regulation of cell cycle G1/S phase transition	GO	3 out of 7	1.43757	downregulated	1	0.47758	0.6203	downregulated	1	2.05118	0.1286	upregulated	1	1.05914	0.3468	upregulated	1	1.1376	0.3206	upregulated	6	3.46513	0.0313	downregulated	6	1.21294	0.2973	downregulated	5	1.14664	0.3177
positive regulation of ruffle assembly	GO	5 out of 7	1.4287	upregulated	1	1.26181	0.2831	upregulated	1	6.91158	0.001	downregulated	2	1.61918	0.1981	downregulated	1	2.4485	0.0864	upregulated	1	1.3148	0.2685	upregulated	1	1.77788	0.169	upregulated	1	2.44173	0.087
negative regulation of oxidative stress-induced neuron death	GO	3 out of 7	1.4267									downregulated	2	2.13083	0.1187					downregulated	3	3.60677	0.0271	upregulated	1	1.10577	0.331	upregulated	3	1.79688	0.1658
chemosensory behavior	GO	2 out of 7	1.42345	downregulated	1	2.08746	0.124					downregulated	1	0.533206	0.5867									downregulated	2	1.19721	0.302	downregulated	1	0.715736	0.4888
renal filtration	GO	3 out of 7	1.41079									downregulated	2	2.4717	0.0844	downregulated	1	1.92986	0.1452	downregulated	2	3.2473	0.0389	upregulated	1	1.16823	0.3109	downregulated	1	0.911709	0.4018
cell maturation	GO	3 out of 7	1.38744	downregulated	4	3.66704	0.0256	upregulated	1	3.7497	0.0235	downregulated	17	6.18724	0.0021	downregulated	9	6.13573	0.0022	downregulated	9	4.68773	0.0092	downregulated	15	3.67755	0.0253	downregulated	14	2.48759	0.0831
regulation of reactive oxygen species biosynthetic process	GO	4 out of 7	1.38634	downregulated	3	2.02342	0.1322	upregulated	4	8.62061	0.0002	downregulated	8	7.71852	0.0004	downregulated	7	6.61569	0.0013	downregulated	6	6.02209	0.0024	downregulated	6	5.12042	0.006	upregulated	9	4.79183	0.0083
MHC protein binding	GO	3 out of 7	1.35528	downregulated	1	2.07521	0.1255	upregulated	1	2.26112	0.1042	downregulated	4	6.21452	0.002	downregulated	2	4.11171	0.0164	downregulated	2	2.16152	0.1151	downregulated	4	2.19035	0.1119	downregulated	4	4.43315	0.0119
DNA replication factor A complex	GO	1 out of 7	1.33191	upregulated	1	1.18687	0.3052	upregulated	1	0.97786	0.3761	downregulated	1	0.584345	0.5575	downregulated	1	0.912442	0.4015	upregulated	2	1.33191	0.264	downregulated	2	0.875979	0.4165	downregulated	2	1.56137	0.2098
positive regulation of reactive oxygen species metabolic process	GO	3 out of 7	1.31954	downregulated	1	1.87482	0.1534	upregulated	2	2.18973	0.1119	downregulated	9	7.3688	0.0006	downregulated	8	6.91797	0.001	downregulated	4	5.26922	0.0051	downregulated	9	3.07889	0.046	downregulated	6	4.30422	0.0135
synaptonemal complex assembly	GO	2 out of 7	1.29445	upregulated	1	0.89606	0.4082	downregulated	1	1.37664	0.2524					downregulated	1	0.813867	0.4431
negative regulation of glycoprotein metabolic process	GO	3 out of 7	1.27933	downregulated	1	3.78003	0.0228	upregulated	1	1.90649	0.1486	upregulated	1	2.26571	0.1038	downregulated	1	0.983362	0.3741	upregulated	1	0.688129	0.5025
limb morphogenesis	GO	4 out of 7	1.22486	downregulated	6	1.26606	0.2819	downregulated	2	2.08877	0.1238	downregulated	8	2.57014	0.0765	upregulated	3	1.89411	0.1505	downregulated	12	4.34347	0.013	downregulated	14	2.88582	0.0558	upregulated	13	4.42329	0.012
regulation of fertilization	GO	2 out of 7	1.22359									downregulated	2	2.27079	0.1032	upregulated	1	2.03509	0.1307	downregulated	1	0.582597	0.5584	upregulated	2	2.31403	0.0989	downregulated	1	0.743534	0.4754
body morphogenesis	GO	2 out of 7	1.21874	upregulated	2	0.338361	0.7129					upregulated	1	0.308479	0.7346	downregulated	2	0.510052	0.6005	upregulated	8	7.08547	0.0008	downregulated	7	4.34085	0.013	downregulated	5	1.3891	0.2493
voltage-gated potassium channel activity involved in cardiac muscle cell action potential repolarization	GO	2 out of 7	1.21656									downregulated	1	2.30464	0.0998					upregulated	4	5.91166	0.0027	downregulated	1	3.34044	0.0354	downregulated	1	3.6593	0.0258
muscle fiber development	GO	3 out of 7	1.21498	upregulated	1	3.47432	0.031	upregulated	2	2.12043	0.12	downregulated	3	4.90936	0.0074	downregulated	1	3.99856	0.0183	upregulated	2	0.431461	0.6496	downregulated	5	2.17839	0.1132	downregulated	4	2.47169	0.0844
positive regulation of T cell migration	GO	2 out of 7	1.21497									upregulated	1	2.06117	0.1273	downregulated	3	4.04461	0.0175	downregulated	2	0.955529	0.3846					upregulated	1	0.187065	0.8294
Seh1-associated complex	GO	3 out of 7	1.21132	upregulated	1	2.05909	0.1276									downregulated	1	0.842295	0.4307	upregulated	3	1.92705	0.1456	downregulated	1	1.06697	0.344	upregulated	2	1.56804	0.2085
positive regulation of telomerase RNA localization to Cajal body	GO	2 out of 7	1.20981	upregulated	1	1.18271	0.3064													upregulated	2	1.45115	0.2343					upregulated	1	0.941368	0.3901
cellular oxidant detoxification	GO	4 out of 7	1.19999	downregulated	2	1.12673	0.3241	upregulated	5	3.02268	0.0487	downregulated	5	6.49069	0.0015	downregulated	3	3.4911	0.0305	downregulated	6	6.53043	0.0015	downregulated	7	1.33809	0.2623	upregulated	4	0.982682	0.3743
snoRNA binding	GO	2 out of 7	1.19815	upregulated	1	0.390694	0.6766	downregulated	2	2.0679	0.1265									downregulated	2	0.623975	0.5358	downregulated	4	0.665247	0.5141	upregulated	3	0.810162	0.4448
replisome	GO	4 out of 7	1.18836	upregulated	2	2.05941	0.1275	upregulated	3	2.9886	0.0504	downregulated	3	1.97805	0.1383	downregulated	3	3.03116	0.0483	upregulated	3	0.947613	0.3877	upregulated	2	1.00712	0.3653	downregulated	2	0.727578	0.4831
carboxylic acid binding	GO	4 out of 7	1.16855	downregulated	3	4.1344	0.016	upregulated	12	9.2735	9.4e-05	downregulated	11	4.82353	0.008	downregulated	9	4.51587	0.0109	upregulated	24	8.15037	0.0003	downregulated	19	5.01926	0.0066	downregulated	15	6.16285	0.0021
regulation of T-helper 17 cell differentiation	GO	3 out of 7	1.15277									downregulated	1	0.408434	0.6647					upregulated	1	0.200049	0.8187	upregulated	1	0.544284	0.5803
thiol-dependent ubiquitinyl hydrolase activity	GO	3 out of 7	1.14833	upregulated	7	0.866288	0.4205	upregulated	12	6.13803	0.0022	upregulated	4	1.76256	0.1716	downregulated	7	2.60529	0.0739	upregulated	18	7.99397	0.0003	downregulated	16	2.50751	0.0815	upregulated	7	1.82347	0.1615
ubiquitinyl hydrolase activity	GO	3 out of 7	1.14833	upregulated	7	0.866288	0.4205	upregulated	12	6.13803	0.0022	upregulated	4	1.76256	0.1716	downregulated	7	2.60529	0.0739	upregulated	18	7.99397	0.0003	downregulated	16	2.50751	0.0815	upregulated	7	1.82347	0.1615
class I DNA-(apurinic or apyrimidinic site) endonuclease activity	GO	1 out of 7	1.1282	upregulated	1	1.23163	0.2918																					upregulated	1	2.35983	0.0944
regulation of chromosome separation	GO	2 out of 7	1.12529	upregulated	4	2.32267	0.098	upregulated	3	1.30292	0.2717	downregulated	7	4.21881	0.0147	downregulated	7	6.09135	0.0023	downregulated	6	3.51652	0.0297	downregulated	6	0.908901	0.403	downregulated	7	1.13385	0.3218
protein localization to endosome	GO	4 out of 7	1.12227	downregulated	1	2.80853	0.0603	downregulated	1	1.594	0.2031	downregulated	1	0.6967	0.4982	downregulated	1	1.3244	0.266	downregulated	3	3.16432	0.0422	downregulated	1	0.851847	0.4266	downregulated	2	1.28519	0.2766
positive regulation of T-helper 17 type immune response	GO	1 out of 7	1.0874																					upregulated	1	1.0874	0.3371
detection of abiotic stimulus	GO	3 out of 7	1.07549	upregulated	4	3.19564	0.0409	downregulated	3	2.92027	0.0539	downregulated	8	4.75006	0.0087	downregulated	8	8.12871	0.0003	downregulated	8	3.36598	0.0345	downregulated	14	5.08545	0.0062	downregulated	13	3.07647	0.0461
interleukin-6 production	GO	2 out of 7	1.07314					upregulated	1	1.47968	0.2277	downregulated	1	1.16818	0.3109					upregulated	1	1.38464	0.2504
embryonic skeletal joint development	GO	1 out of 7	1.06366	downregulated	2	3.46264	0.0313					upregulated	1	2.39898	0.0908
regulation of T-helper 17 type immune response	GO	3 out of 7	1.05864									downregulated	1	0.371243	0.6899					upregulated	1	0.174928	0.8395	upregulated	1	0.512474	0.599
ubiquitin-like protein ligase binding	GO	3 out of 7	1.05852	upregulated	19	1.379	0.2518	upregulated	17	2.43887	0.0873	downregulated	21	3.34587	0.0352	downregulated	15	2.47008	0.0846	upregulated	41	8.47681	0.0002	downregulated	52	9.41637	8.1e-05	upregulated	28	7.85791	0.0004
small nucleolar ribonucleoprotein complex	GO	1 out of 7	1.0543	upregulated	2	2.47179	0.0844	upregulated	1	0.955886	0.3845	upregulated	1	1.35157	0.2588					upregulated	2	1.0543	0.3484	upregulated	1	1.17375	0.3092	upregulated	2	1.65714	0.1907
positive regulation of cytokine production involved in inflammatory response	GO	2 out of 7	1.04406	downregulated	2	3.30334	0.0368	upregulated	2	3.90022	0.0202									upregulated	1	1.64094	0.1938
bone growth	GO	2 out of 7	1.00647	downregulated	3	2.37576	0.0929					downregulated	3	2.5087	0.0814	upregulated	1	1.99905	0.1355	upregulated	1	2.82142	0.0595	downregulated	3	1.26103	0.2834	downregulated	3	0.617907	0.5391
mitotic nuclear division	GO	4 out of 7	0.995183	upregulated	12	4.11284	0.0164	upregulated	13	8.5501	0.0002	downregulated	14	4.07017	0.0171	downregulated	6	1.90877	0.1483	upregulated	20	6.36802	0.0017	upregulated	9	4.21778	0.0147	downregulated	21	2.90662	0.0547
FMN binding	GO	2 out of 7	0.977185									downregulated	2	2.87459	0.0564	downregulated	1	1.3364	0.2628	downregulated	1	2.02102	0.1325	downregulated	1	0.627885	0.5337	downregulated	1	0.584912	0.5572
renal tubule development	GO	4 out of 7	0.964864	upregulated	7	6.23429	0.002	downregulated	3	2.2085	0.1099	downregulated	9	6.01341	0.0024	downregulated	5	2.9895	0.0503	downregulated	6	3.81094	0.0221	downregulated	8	5.69875	0.0034	upregulated	12	5.49742	0.0041
heterotrimeric G-protein complex	GO	1 out of 7	0.957049	upregulated	3	5.00813	0.0067	downregulated	1	1.11978	0.3264	upregulated	2	1.238	0.29	downregulated	1	0.339369	0.7122	upregulated	2	0.957049	0.384	downregulated	7	5.77873	0.0031	downregulated	5	4.00429	0.0182
extrinsic component of cytoplasmic side of plasma membrane	GO	4 out of 7	0.951864	upregulated	5	5.36068	0.0047	upregulated	1	1.59624	0.2027	downregulated	5	2.17389	0.1137	downregulated	9	4.83322	0.008	upregulated	7	3.25747	0.0385	downregulated	16	6.70114	0.0012	upregulated	9	4.34534	0.013
disulfide oxidoreductase activity	GO	2 out of 7	0.939513	upregulated	3	1.18022	0.3072	upregulated	1	1.54467	0.2134	upregulated	1	0.410413	0.6634	upregulated	1	1.4288	0.2396	upregulated	4	3.67644	0.0253	upregulated	4	3.12827	0.0438	upregulated	2	1.82717	0.1609
oxidoreductase activity, acting on diphenols and related substances as donors	GO	1 out of 7	0.918953																									upregulated	1	0.918953	0.3989
regulation of telomerase RNA localization to Cajal body	GO	2 out of 7	0.912814	upregulated	1	0.996307	0.3692													upregulated	2	1.12903	0.3233					upregulated	1	0.780093	0.4584
pre-mRNA cleavage required for polyadenylation	GO	3 out of 7	0.89851					upregulated	1	1.36341	0.2558	upregulated	1	1.75397	0.1731	downregulated	1	1.89085	0.1509	upregulated	1	1.59941	0.202	upregulated	1	1.70274	0.1822	downregulated	1	1.1771	0.3082
retinoid binding	GO	1 out of 7	0.882279	upregulated	1	1.5507	0.2121					upregulated	2	2.44954	0.0863	upregulated	1	1.53689	0.215	upregulated	2	0.882279	0.4138	upregulated	2	0.911697	0.4018	upregulated	1	1.06348	0.3453
oxidoreductase activity, acting on the CH-NH2 group of donors, oxygen as acceptor	GO	1 out of 7	0.877352																	downregulated	2	1.50421	0.2222	upregulated	1	1.80768	0.164	upregulated	1	2.38156	0.0924
negative regulation of mitotic sister chromatid separation	GO	2 out of 7	0.857945	upregulated	2	3.13284	0.0436					downregulated	3	3.17808	0.0417	downregulated	4	6.27422	0.0019	downregulated	4	5.07164	0.0063	downregulated	1	0.656306	0.5188	downregulated	2	0.389886	0.6771
interleukin-2 production	GO	1 out of 7	0.839627																									upregulated	1	0.839627	0.4319
positive regulation of lymphocyte migration	GO	2 out of 7	0.836674									upregulated	1	1.92715	0.1456	downregulated	3	3.77409	0.023	downregulated	2	0.845616	0.4293	downregulated	1	0.300503	0.7404	upregulated	1	0.135857	0.873
negative regulation of viral-induced cytoplasmic pattern recognition receptor signaling pathway	GO	2 out of 7	0.811615					upregulated	2	3.2808	0.0376	downregulated	1	2.86575	0.0569					downregulated	1	1.90064	0.1495					upregulated	1	3.12729	0.0438
collagen-containing extracellular matrix	GO	3 out of 7	0.791789	downregulated	7	2.3905	0.0916	upregulated	6	1.40656	0.245	upregulated	7	4.18556	0.0152	upregulated	1	0.660962	0.5164	downregulated	12	1.37382	0.2531	upregulated	11	3.24683	0.0389	upregulated	15	2.78136	0.062
fucosylation	GO	2 out of 7	0.782908													downregulated	1	1.95673	0.1413	upregulated	1	0.921474	0.3979	downregulated	2	1.67477	0.1874	downregulated	1	0.42053	0.6567
regulation of Golgi organization	GO	3 out of 7	0.782706	upregulated	2	2.99181	0.0502	upregulated	1	0.712587	0.4904	downregulated	2	2.56905	0.0766	downregulated	2	2.31012	0.0992	upregulated	2	3.66008	0.0257	downregulated	4	4.05215	0.0174	downregulated	2	1.85799	0.156
regulation of mesoderm development	GO	3 out of 7	0.765272	upregulated	2	2.61909	0.0729	downregulated	1	1.89971	0.1496	upregulated	1	0.943375	0.3893					upregulated	2	0.456998	0.6332	upregulated	3	2.25315	0.1051	downregulated	1	0.282124	0.7542
ribonucleoprotein complex biogenesis	GO	2 out of 7	0.741975	upregulated	21	1.84708	0.1577	upregulated	26	5.9953	0.0025	upregulated	12	1.36392	0.2557	upregulated	3	0.418767	0.6579	upregulated	46	5.22227	0.0054	downregulated	48	1.72672	0.1779	upregulated	41	6.8715	0.001
presynaptic membrane assembly	GO	3 out of 7	0.732667	upregulated	1	1.34549	0.2604					upregulated	2	4.36282	0.0127	upregulated	1	3.79028	0.0226	upregulated	1	1.81118	0.1635	upregulated	1	1.40904	0.2444	upregulated	2	2.64822	0.0708
meiotic cell cycle	GO	5 out of 7	0.652467	upregulated	8	0.763196	0.4662	upregulated	11	3.30276	0.0368	downregulated	13	1.71834	0.1794	downregulated	8	1.34151	0.2615	upregulated	16	0.255656	0.7744	upregulated	7	1.14983	0.3167	upregulated	9	0.253096	0.7764
positive regulation of blood pressure	GO	3 out of 7	0.647755					downregulated	1	1.91331	0.1476	upregulated	2	1.73169	0.177	upregulated	1	1.84433	0.1581	upregulated	2	1.18366	0.3062	downregulated	2	0.172629	0.8414	upregulated	3	1.29943	0.2727
carbohydrate transmembrane transporter activity	GO	2 out of 7	0.638469	upregulated	2	2.24609	0.1058					downregulated	2	3.678	0.0253	downregulated	3	6.4566	0.0016	downregulated	4	2.79803	0.0609	downregulated	5	3.62502	0.0266	downregulated	4	3.62502	0.0266
response to dopamine	GO	4 out of 7	0.636811	upregulated	1	1.82578	0.1611	upregulated	1	4.00095	0.0183	downregulated	2	2.25905	0.1044	downregulated	1	1.26347	0.2827	downregulated	1	0.939499	0.3908	upregulated	1	1.53294	0.2159	upregulated	2	2.34758	0.0956
cellular response to dopamine	GO	4 out of 7	0.636811	upregulated	1	1.82578	0.1611	upregulated	1	4.00095	0.0183	downregulated	2	2.25905	0.1044	downregulated	1	1.26347	0.2827	downregulated	1	0.939499	0.3908	upregulated	1	1.53294	0.2159	upregulated	2	2.34758	0.0956
Derlin-1 retrotranslocation complex	GO	3 out of 7	0.629004	upregulated	1	1.76853	0.1706	upregulated	1	1.04588	0.3514					downregulated	1	1.43609	0.2379					upregulated	1	1.06039	0.3463	upregulated	1	0.946935	0.3879
Arp2/3 protein complex	GO	1 out of 7	0.621501									upregulated	1	1.17199	0.3097	upregulated	1	2.71908	0.0659	upregulated	1	0.621501	0.5371	downregulated	3	1.89116	0.1509	downregulated	2	1.5205	0.2186
TBP-class protein binding	GO	3 out of 7	0.605412	upregulated	3	2.07199	0.1259	upregulated	1	1.33686	0.2627					downregulated	2	1.43169	0.2389	downregulated	1	0.588954	0.5549	upregulated	1	1.08892	0.3366	upregulated	3	2.08262	0.1246
regulation of dendritic spine maintenance	GO	3 out of 7	0.588656					downregulated	1	1.94951	0.1423	upregulated	1	2.79778	0.0609	upregulated	1	2.91344	0.0543	upregulated	1	1.057	0.3475	downregulated	2	0.802584	0.4482	upregulated	2	4.09596	0.0166
structural constituent of eye lens	GO	1 out of 7	0.579546									downregulated	1	2.09496	0.1231	upregulated	1	2.03509	0.1307	upregulated	1	0.579546	0.5602	upregulated	1	2.64585	0.0709	upregulated	2	3.33229	0.0357
cellular component disassembly involved in execution phase of apoptosis	GO	3 out of 7	0.53546	upregulated	2	1.68712	0.1851	upregulated	2	3.65786	0.0258	downregulated	5	3.23562	0.0393	downregulated	1	0.505484	0.6032	upregulated	5	2.13934	0.1177	upregulated	1	2.39642	0.091	upregulated	5	3.13776	0.0434
regulation of transforming growth factor beta receptor signaling pathway	GO	2 out of 7	0.497026	upregulated	5	2.23004	0.1075	downregulated	2	4.12832	0.0161	upregulated	7	4.94126	0.0071	downregulated	6	3.37947	0.0341	upregulated	14	4.28885	0.0137	upregulated	3	4.84346	0.0079	upregulated	8	5.14753	0.0058
nuclear pore nuclear basket	GO	2 out of 7	0.472225													downregulated	1	1.19715	0.3021	downregulated	1	1.23613	0.2905	upregulated	1	0.92891	0.395	downregulated	1	0.417703	0.6586
negative regulation of viral release from host cell	GO	2 out of 7	0.465109	upregulated	2	1.68551	0.1854	upregulated	1	0.747067	0.4738									upregulated	3	2.92319	0.0538	downregulated	1	0.700063	0.4966	upregulated	1	0.674556	0.5094
phosphoprotein binding	GO	2 out of 7	0.457752	upregulated	6	3.74344	0.0237	upregulated	1	0.248619	0.7799	downregulated	11	8.07428	0.0003	downregulated	6	7.25717	0.0007	upregulated	6	2.35833	0.0946	downregulated	15	7.19457	0.0008	downregulated	15	7.43052	0.0006
regulation of organelle assembly	GO	4 out of 7	0.439365	upregulated	17	6.22672	0.002	upregulated	10	2.36056	0.0944	downregulated	18	1.59013	0.2039	downregulated	11	2.20881	0.1098	upregulated	25	6.02745	0.0024	downregulated	34	6.19412	0.002	upregulated	22	5.39437	0.0045
cellular response to hepatocyte growth factor stimulus	GO	3 out of 7	0.407413	downregulated	1	2.47996	0.0837	upregulated	1	2.28457	0.1018	upregulated	1	2.40205	0.0905					upregulated	2	1.13652	0.3209	upregulated	2	1.47755	0.2282	downregulated	1	1.62637	0.1966
isoprenoid binding	GO	4 out of 7	0.371008	upregulated	1	1.45285	0.2339	upregulated	1	0.730283	0.4818	upregulated	3	4.39756	0.0123	downregulated	2	1.73812	0.1759	upregulated	3	1.57912	0.2062	upregulated	3	2.29786	0.1005	upregulated	2	1.33659	0.2627
cellular response to potassium ion	GO	1 out of 7	0.309695																					downregulated	1	0.780256	0.4583	upregulated	1	1.08995	0.3362
liver regeneration	GO	4 out of 7	0.25071	downregulated	1	0.496382	0.6087	upregulated	2	5.15002	0.0058	downregulated	5	2.26552	0.1038	upregulated	1	2.21698	0.1089	downregulated	4	1.26345	0.2827	upregulated	1	0.30952	0.7338	upregulated	6	5.80974	0.003
regulation of cellular response to hypoxia	GO	2 out of 7	0.249726					downregulated	1	2.01267	0.1336	upregulated	1	2.26655	0.1037					downregulated	1	0.782984	0.457	upregulated	1	1.28659	0.2762
hormone activity	GO	1 out of 7	0.247693	downregulated	3	4.14288	0.0159	downregulated	1	0.329124	0.7196	upregulated	2	2.22814	0.1077	upregulated	1	1.21252	0.2974	upregulated	3	0.247693	0.7806	downregulated	3	2.19756	0.1111	downregulated	1	2.70397	0.0669
lipid modification	GO	3 out of 7	0.238618	upregulated	12	0.703844	0.4947	upregulated	13	2.9249	0.0537	downregulated	20	6.50278	0.0015	downregulated	11	2.94954	0.0524	downregulated	20	3.7009	0.0247	downregulated	38	4.92707	0.0072	upregulated	24	3.04301	0.0477
establishment or maintenance of monopolar cell polarity	GO	3 out of 7	0.191325	downregulated	1	1.05968	0.3466	downregulated	1	4.6227	0.0098	downregulated	1	0.364645	0.6944					downregulated	1	0.420623	0.6566	downregulated	3	2.50381	0.0818	downregulated	4	2.93126	0.0533
post-Golgi vesicle-mediated transport	GO	2 out of 7	0.190744	upregulated	7	2.84267	0.0583	downregulated	2	0.958751	0.3834	upregulated	3	1.22936	0.2925	downregulated	8	4.83974	0.0079	downregulated	8	1.53572	0.2153	downregulated	17	6.32383	0.0018	downregulated	16	5.1001	0.0061
negative regulation of cellular response to insulin stimulus	GO	2 out of 7	0.185365	downregulated	3	2.95331	0.0522	upregulated	2	0.802745	0.4481	upregulated	1	0.460389	0.631					upregulated	5	1.82493	0.1612	downregulated	4	1.93396	0.1446	downregulated	5	1.39578	0.2476
positive regulation of macrophage migration	GO	3 out of 7	0.172614					upregulated	1	6.91158	0.001	downregulated	1	2.18321	0.1127	downregulated	2	3.96617	0.0189									upregulated	1	0.93481	0.3927
pyrimidine-containing compound transmembrane transport	GO	1 out of 7	0.153607																	downregulated	1	1.15426	0.3153	upregulated	1	1.30787	0.2704
ribonuclease P complex	GO	4 out of 7	0.144538	upregulated	1	1.56871	0.2083					upregulated	2	4.35173	0.0129	downregulated	1	1.27449	0.2796	upregulated	1	0.659271	0.5172	upregulated	1	1.62848	0.1962	upregulated	2	2.50275	0.0819
regulation of response to reactive oxygen species	GO	4 out of 7	0.120111	downregulated	3	2.44068	0.0871	upregulated	3	6.56697	0.0014	downregulated	4	3.49212	0.0304	downregulated	1	1.80789	0.164	downregulated	3	4.0591	0.0173	downregulated	3	2.61382	0.0733	upregulated	5	1.56021	0.2101
digestion	GO	2 out of 7	0.118712	downregulated	2	0.746899	0.4738	upregulated	3	2.95436	0.0521	upregulated	3	2.17601	0.1135	downregulated	5	3.70627	0.0246	upregulated	7	4.13661	0.016	downregulated	5	2.09448	0.1231	downregulated	3	0.499322	0.6069
negative regulation of protein localization to nucleus	GO	4 out of 7	0.104372	downregulated	2	1.61722	0.1985	downregulated	1	4.74815	0.0087	downregulated	2	1.1678	0.3111	downregulated	2	2.55189	0.0779	downregulated	6	4.29729	0.0136	downregulated	4	3.08416	0.0458	downregulated	3	2.59923	0.0743
positive regulation of vascular smooth muscle cell proliferation	GO	2 out of 7	0.0892237	upregulated	2	1.17139	0.3099					upregulated	1	0.5312	0.5879	downregulated	1	0.94824	0.3874	upregulated	3	3.67162	0.0254	downregulated	3	1.12085	0.326	downregulated	3	1.7072	0.1814
basic amino acid transmembrane transport	GO	1 out of 7	0.0684742																	upregulated	2	1.87182	0.1538	downregulated	2	0.994041	0.3701	downregulated	2	0.809305	0.4452
regulation of Wnt signaling pathway, planar cell polarity pathway	GO	3 out of 7	0.0539409	upregulated	1	2.14805	0.1167					downregulated	1	0.776888	0.4598					upregulated	1	2.09423	0.1232	downregulated	2	1.43924	0.2371	upregulated	1	0.77011	0.463
