# Supplementary material for: Physical Activity Rewires the Human Brain against Neurodegeneration
Source: Int J Mol Sci. 2022 Jun 2;23(11):6223. doi: 10.3390/ijms23116223 (PMC9181322; doi:10.3390/ijms23116223)
Supplement: Supplementary file 1 [file ijms-23-06223-s001.zip › Table S14.xlsx]

## Sheet: Sheet1
Table S14. Functional analysis of genes upregulated in physically active subjects and downregulated in Huntington's disease datasets
Bioset 1: Hippocampi from 76-99yr old female subjects with high physical activity levels _vs_ low (Study: Hippocampi from post-mortem brains of subjects with low, moderate, or high physical activity levels)
Bioset 2: Hippocampi from 76-99yr old female subjects with moderate physical activity levels _vs_ low (Study: Hippocampi from post-mortem brains of subjects with low, moderate, or high physical activity levels)
Bioset 3: Hippocampi from 78-101yr old male subjects with high physical activity levels _vs_ low (Study: Hippocampi from post-mortem brains of subjects with low, moderate, or high physical activity levels)
Bioset 4: Hippocampi from 78-101yr old male subjects with moderate physical activity levels _vs_ low (Study: Hippocampi from post-mortem brains of subjects with low, moderate, or high physical activity levels)
Bioset 5: Caudate Nucleus- Huntingtons disease grade 1 _vs_ control_GPL97 (Study: Huntington's disease - Cerebellum, Caudate nucleus, Motor cortex BA4, and Prefrontal cortex BA9)
Bioset 6: Caudate Nucleus- Huntingtons disease grade 2 _vs_ control_GPL97 (Study: Huntington's disease - Cerebellum, Caudate nucleus, Motor cortex BA4, and Prefrontal cortex BA9)
Bioset 7: Caudate Nucleus- Huntingtons disease grade 3 _vs_ control_GPL97 (Study: Huntington's disease - Cerebellum, Caudate nucleus, Motor cortex BA4, and Prefrontal cortex BA9)
Bioset 8: Caudate Nucleus- Huntingtons disease grade 4 _vs_ control_GPL97 (Study: Huntington's disease - Cerebellum, Caudate nucleus, Motor cortex BA4, and Prefrontal cortex BA9)
Biogroup	Source	Specificity	Overall Biogroup score	Correlated direction - Bioset 1	Common genes - Bioset 1	Score - Bioset 1	p-value - Bioset 1	Correlated direction - Bioset 2	Common genes - Bioset 2	Score - Bioset 2	p-value - Bioset 2	Correlated direction - Bioset 3	Common genes - Bioset 3	Score - Bioset 3	p-value - Bioset 3	Correlated direction - Bioset 4	Common genes - Bioset 4	Score - Bioset 4	p-value - Bioset 4	Correlated direction - Bioset 5	Common genes - Bioset 5	Score - Bioset 5	p-value - Bioset 5	Correlated direction - Bioset 6	Common genes - Bioset 6	Score - Bioset 6	p-value - Bioset 6	Correlated direction - Bioset 7	Common genes - Bioset 7	Score - Bioset 7	p-value - Bioset 7	Correlated direction - Bioset 8	Common genes - Bioset 8	Score - Bioset 8	p-value - Bioset 8
synaptic membrane	GO	7 out of 8	304.272	upregulated	28	15.4912	1.9e-07	downregulated	5	0.373244	0.6885	upregulated	25	14.7116	4.1e-07	upregulated	9	9.55228	7.1e-05	downregulated	49	56.2279	3.8e-25	downregulated	80	78.6194	7.2e-35	downregulated	77	75.4478	1.7e-33	downregulated	57	54.5954	1.9e-24
postsynapse	GO	7 out of 8	303.805	upregulated	39	19.9728	2.1e-09	downregulated	11	1.62425	0.1971	upregulated	34	15.0247	3e-07	upregulated	12	8.49143	0.0002	downregulated	62	58.4403	4.2e-26	downregulated	98	86.3426	3.2e-38	downregulated	91	71.3824	1e-31	downregulated	62	45.7749	1.3e-20
synaptic signaling	GO	7 out of 8	299.631	upregulated	43	41.3164	1.1e-18	downregulated	4	1.08021	0.3395	upregulated	22	10.8215	2e-05	upregulated	4	4.28855	0.0137	downregulated	51	51.3374	5.1e-23	downregulated	78	72.866	2.3e-32	downregulated	73	66.8934	8.9e-30	downregulated	56	53.1875	8e-24
chemical synaptic transmission	GO	7 out of 8	285.129	upregulated	42	38.9629	1.2e-17	downregulated	4	1.13052	0.3229	upregulated	21	11.0061	1.7e-05	upregulated	4	4.4174	0.0121	downregulated	50	51.4328	4.6e-23	downregulated	75	68.6917	1.5e-30	downregulated	70	62.4011	7.9e-28	downregulated	54	49.3471	3.7e-22
postsynaptic membrane	GO	7 out of 8	266.77	upregulated	23	13.0835	2.1e-06	downregulated	5	0.78012	0.4584	upregulated	22	15.8199	1.3e-07	upregulated	8	8.6607	0.0002	downregulated	42	52.4035	1.7e-23	downregulated	64	66.6584	1.1e-29	downregulated	63	65.6889	3e-29	downregulated	45	45.2351	2.3e-20
asymmetric synapse	GO	7 out of 8	236.066	upregulated	21	13.4083	1.5e-06	downregulated	6	1.1243	0.3249	upregulated	24	16.3527	7.9e-08	upregulated	7	4.07378	0.017	downregulated	40	47.3526	2.7e-21	downregulated	57	63.7792	2e-28	downregulated	54	56.9372	1.9e-25	downregulated	38	35.2862	4.7e-16
postsynaptic density	GO	7 out of 8	233.152	upregulated	21	13.8338	9.8e-07	downregulated	6	1.18682	0.3052	upregulated	24	16.8327	4.9e-08	upregulated	7	4.19419	0.0151	downregulated	39	46.4023	7e-21	downregulated	56	62.7548	5.6e-28	downregulated	52	56.2597	3.7e-25	downregulated	37	34.0612	1.6e-15
postsynaptic specialization	GO	7 out of 8	232.144	upregulated	21	13.726	1.1e-06	downregulated	6	1.17088	0.3101	upregulated	24	16.7112	5.5e-08	upregulated	7	4.16369	0.0156	downregulated	39	46.1149	9.4e-21	downregulated	57	62.8465	5.1e-28	downregulated	52	55.8937	5.3e-25	downregulated	37	33.8589	2e-15
regulation of membrane potential	GO	7 out of 8	192.007	upregulated	25	18.3535	1.1e-08	downregulated	8	2.94568	0.0526	upregulated	23	7.99584	0.0003	upregulated	6	4.20939	0.0149	downregulated	43	41.6392	8.2e-19	downregulated	58	44.4432	5e-20	downregulated	59	44.4617	4.9e-20	downregulated	47	33.8496	2e-15
transmembrane transporter complex	GO	7 out of 8	167.359	upregulated	24	21.1646	6.4e-10	downregulated	7	1.49227	0.2249	upregulated	11	4.43845	0.0118	upregulated	1	2.22299	0.1083	downregulated	31	27.5462	1.1e-12	downregulated	51	38.0595	3e-17	downregulated	53	42.9384	2.2e-19	downregulated	43	32.4811	7.8e-15
presynapse	GO	7 out of 8	139.589	upregulated	30	17.415	2.7e-08	upregulated	5	1.03527	0.3551	downregulated	17	3.05633	0.0471	upregulated	2	3.11245	0.0445	downregulated	33	19.5828	3.1e-09	downregulated	65	43.1375	1.8e-19	downregulated	59	30.5777	5.3e-14	downregulated	44	27.7846	8.6e-13
neurotransmitter secretion	GO	7 out of 8	124.177	upregulated	9	8.54019	0.0002	upregulated	1	0.167673	0.8456	upregulated	5	2.92829	0.0535	downregulated	2	0.993192	0.3704	downregulated	14	13.9083	9.1e-07	downregulated	30	40.9077	1.7e-18	downregulated	24	33.9106	1.9e-15	downregulated	17	24.8077	1.7e-11
ion channel activity	GO	4 out of 8	116.291	upregulated	22	12.0413	5.9e-06	downregulated	6	1.27349	0.2799	downregulated	24	8.44112	0.0002	upregulated	4	2.98916	0.0503	downregulated	30	23.0346	9.9e-11	downregulated	49	31.1072	3.1e-14	downregulated	53	32.5071	7.6e-15	downregulated	53	29.6426	1.3e-13
dendritic spine	GO	7 out of 8	114.037	upregulated	12	7.54659	0.0005	downregulated	7	3.3794	0.0341	upregulated	11	4.38466	0.0125	upregulated	5	5.41856	0.0044	downregulated	23	25.9695	5.3e-12	downregulated	32	31.0285	3.3e-14	downregulated	29	28.1763	5.8e-13	downregulated	17	14.8926	3.4e-07
regulation of synapse structure or activity	GO	7 out of 8	113.263	upregulated	18	11.0633	1.6e-05	downregulated	5	2.47436	0.0842	upregulated	8	4.72274	0.0089	upregulated	6	7.19365	0.0008	downregulated	22	22.1829	2.3e-10	downregulated	37	32.8957	5.2e-15	downregulated	34	22.6917	1.4e-10	downregulated	21	14.9869	3.1e-07
regulation of cation channel activity	GO	6 out of 8	110.765	upregulated	13	10.8918	1.9e-05	downregulated	4	1.50783	0.2214	upregulated	5	1.01145	0.3637	downregulated	2	2.72108	0.0658	downregulated	19	19.0561	5.3e-09	downregulated	31	25.0889	1.3e-11	downregulated	36	32.1205	1.1e-14	downregulated	24	26.8251	2.2e-12
regulation of synapse organization	GO	7 out of 8	108.562	upregulated	18	11.5014	1e-05	downregulated	4	2.50352	0.0818	upregulated	8	4.89487	0.0075	upregulated	6	7.35095	0.0006	downregulated	22	22.8571	1.2e-10	downregulated	35	31.2544	2.7e-14	downregulated	32	20.5409	1.2e-09	downregulated	19	12.6656	3.2e-06
passive transmembrane transporter activity	GO	5 out of 8	108.151	upregulated	24	13.0557	2.1e-06	downregulated	6	1.2015	0.3007	downregulated	26	8.11757	0.0003	downregulated	15	3.00019	0.0498	downregulated	30	21.1082	6.8e-10	downregulated	49	28.9008	2.8e-13	downregulated	54	30.476	5.8e-14	downregulated	54	26.9295	2e-12
synaptic vesicle cycle	GO	7 out of 8	104.89	upregulated	5	3.45979	0.0314	upregulated	1	0.133963	0.8746	upregulated	5	2.58466	0.0754	downregulated	4	1.33927	0.262	downregulated	13	11.5283	9.8e-06	downregulated	27	36.5783	1.3e-16	downregulated	22	28.6017	3.8e-13	downregulated	17	23.3428	7.3e-11
synaptic vesicle exocytosis	GO	7 out of 8	100.678	upregulated	3	4.01069	0.0181	upregulated	1	0.380528	0.6835	upregulated	4	3.29875	0.0369	downregulated	2	1.66505	0.1892	downregulated	9	9.95584	4.7e-05	downregulated	20	32.9722	4.8e-15	downregulated	17	28.7612	3.2e-13	downregulated	14	22.9641	1.1e-10
synaptic vesicle transport	GO	5 out of 8	91.7677	upregulated	6	3.62746	0.0266	downregulated	1	0.370782	0.6902	downregulated	5	3.22584	0.0397	downregulated	5	2.26635	0.1037	downregulated	12	12.6526	3.2e-06	downregulated	25	33.5552	2.7e-15	downregulated	20	27.211	1.5e-12	downregulated	17	20.5845	1.1e-09
distal axon	GO	7 out of 8	90.4857	upregulated	19	11.4914	1e-05	upregulated	8	1.17386	0.3092	upregulated	5	2.78639	0.0616	downregulated	11	1.92863	0.1453	downregulated	26	17.6808	2.1e-08	downregulated	39	22.9787	1e-10	downregulated	43	22.1619	2.4e-10	downregulated	21	14.1412	7.2e-07
synaptic vesicle localization	GO	5 out of 8	90.3338	upregulated	6	3.60336	0.0272	downregulated	1	0.362698	0.6958	downregulated	5	3.17071	0.042	downregulated	5	2.21822	0.1088	downregulated	12	12.5202	3.7e-06	downregulated	25	32.923	5e-15	downregulated	20	26.7288	2.5e-12	downregulated	17	20.3101	1.5e-09
regulation of synapse assembly	GO	8 out of 8	84.7538	upregulated	14	16.1358	9.8e-08	upregulated	2	1.1051	0.3312	upregulated	6	6.43178	0.0016	upregulated	3	4.27625	0.0139	downregulated	11	12.5469	3.6e-06	downregulated	20	22.4756	1.7e-10	downregulated	18	15.2599	2.4e-07	downregulated	9	6.52243	0.0015
regulation of neurotransmitter secretion	GO	7 out of 8	81.8733	upregulated	6	3.43944	0.0321	upregulated	1	2.99185	0.0502	upregulated	4	2.42106	0.0888	downregulated	2	1.44975	0.2346	downregulated	12	14.8694	3.5e-07	downregulated	18	20.1056	1.9e-09	downregulated	16	21.7826	3.5e-10	downregulated	13	17.7131	2e-08
exocytic vesicle membrane	GO	7 out of 8	78.8711	upregulated	12	14.8156	3.7e-07	downregulated	1	0.163223	0.8494	upregulated	3	0.860862	0.4228	upregulated	1	2.50977	0.0813	downregulated	10	9.65173	6.4e-05	downregulated	21	21.6184	4.1e-10	downregulated	20	15.0016	3.1e-07	downregulated	15	14.5763	4.7e-07
neurotransmitter transport	GO	6 out of 8	78.3818	upregulated	13	10.0457	4.3e-05	upregulated	2	0.874164	0.4172	downregulated	10	6.3983	0.0017	downregulated	7	5.67889	0.0034	downregulated	16	10.5661	2.6e-05	downregulated	35	27.9095	7.6e-13	downregulated	32	23.0258	1e-10	downregulated	20	18.0377	1.5e-08
neuronal cell body	GO	5 out of 8	76.5436	upregulated	25	5.95831	0.0026	downregulated	9	3.1561	0.0426	downregulated	39	7.41319	0.0006	downregulated	17	3.85131	0.0213	downregulated	38	24.0599	3.6e-11	downregulated	55	23.009	1e-10	downregulated	52	23.2306	8.1e-11	downregulated	34	14.7064	4.1e-07
regulation of neurotransmitter levels	GO	4 out of 8	70.9523	upregulated	20	10.2113	3.7e-05	upregulated	8	6.57169	0.0014	downregulated	16	7.91252	0.0004	downregulated	15	8.44485	0.0002	downregulated	23	9.92883	4.9e-05	downregulated	43	23.9205	4.1e-11	downregulated	37	19.4796	3.5e-09	downregulated	30	17.6234	2.2e-08
GABA-A receptor complex	GO	7 out of 8	68.604	upregulated	4	10.4368	2.9e-05					upregulated	1	4.60993	0.01	upregulated	1	5.05002	0.0064	downregulated	4	12.9635	2.3e-06	downregulated	5	13.6906	1.1e-06	downregulated	5	14.3611	5.8e-07	downregulated	3	7.49198	0.0006
regulation of sodium ion transmembrane transport	GO	6 out of 8	68.5571	upregulated	5	3.9374	0.0195	downregulated	2	1.8797	0.1526	upregulated	1	1.31562	0.2683	downregulated	1	0.189217	0.8276	downregulated	10	14.9703	3.2e-07	downregulated	16	17.9655	1.6e-08	downregulated	14	15.5291	1.8e-07	downregulated	13	16.9082	4.5e-08
GABA receptor complex	GO	7 out of 8	67.3742	upregulated	4	10.2766	3.4e-05					upregulated	1	4.51277	0.011	upregulated	1	4.95268	0.0071	downregulated	4	12.7443	2.9e-06	downregulated	5	13.4113	1.5e-06	downregulated	5	14.1407	7.2e-07	downregulated	3	7.33583	0.0007
establishment of vesicle localization	GO	7 out of 8	67.0853	upregulated	13	6.10264	0.0022	upregulated	5	0.183208	0.8326	upregulated	11	3.22872	0.0396	downregulated	10	2.87842	0.0562	downregulated	18	9.22234	9.9e-05	downregulated	38	22.6555	1.4e-10	downregulated	24	15.4023	2e-07	downregulated	24	13.1691	1.9e-06
modulation of excitatory postsynaptic potential	GO	7 out of 8	65.9034	upregulated	3	3.69438	0.0249	downregulated	2	3.64562	0.0261	upregulated	4	5.37591	0.0046	upregulated	4	9.51692	7.4e-05	downregulated	7	7.83971	0.0004	downregulated	11	15.7828	1.4e-07	downregulated	11	13.2416	1.8e-06	downregulated	7	14.0977	7.5e-07
calmodulin binding	GO	4 out of 8	65.5762	upregulated	7	4.45174	0.0117	downregulated	2	1.66911	0.1884	downregulated	20	3.19693	0.0409	downregulated	10	3.38833	0.0338	downregulated	16	15.0702	2.9e-07	downregulated	28	18.4753	9.5e-09	downregulated	27	19.004	5.6e-09	downregulated	24	13.0267	2.2e-06
vesicle localization	GO	7 out of 8	64.8238	upregulated	13	5.88301	0.0028	upregulated	5	0.165569	0.8474	upregulated	11	3.07183	0.0463	downregulated	10	2.7466	0.0641	downregulated	18	8.86121	0.0001	downregulated	38	21.8518	3.2e-10	downregulated	24	14.8982	3.4e-07	downregulated	24	12.8389	2.7e-06
receptor localization to synapse	GO	5 out of 8	64.2898	upregulated	4	2.71182	0.0664	downregulated	3	3.98166	0.0187	downregulated	2	1.26505	0.2822					downregulated	6	8.92774	0.0001	downregulated	13	20.6887	1e-09	downregulated	12	19.9289	2.2e-09	downregulated	9	17.2794	3.1e-08
regulation of calcium ion transmembrane transporter activity	GO	7 out of 8	64.2687	upregulated	7	6.40708	0.0016	downregulated	2	4.70472	0.0091	upregulated	4	1.64067	0.1938	upregulated	1	0.989171	0.3719	downregulated	10	13.4203	1.5e-06	downregulated	13	17.3047	3.1e-08	downregulated	14	18.2038	1.2e-08	downregulated	8	11.0077	1.7e-05
learning or memory	GO	8 out of 8	63.0399	upregulated	12	6.58619	0.0014	upregulated	7	1.44714	0.2352	upregulated	10	2.49184	0.0828	upregulated	4	3.84481	0.0214	downregulated	22	12.4574	3.9e-06	downregulated	34	15.0237	3e-07	downregulated	33	13.8632	9.5e-07	downregulated	25	7.32566	0.0007
neurotransmitter receptor activity	GO	7 out of 8	62.7427	upregulated	7	10.1093	4.1e-05	downregulated	1	1.52399	0.2178	upregulated	4	7.15034	0.0008	upregulated	1	3.45706	0.0315	downregulated	8	10.644	2.4e-05	downregulated	10	13.4316	1.5e-06	downregulated	8	10.6072	2.5e-05	downregulated	10	8.86712	0.0001
regulation of postsynapse organization	GO	7 out of 8	60.2476	upregulated	5	1.24007	0.2894	upregulated	3	2.42245	0.0887	upregulated	4	3.33597	0.0356	upregulated	5	9.71675	6e-05	downregulated	10	12.072	5.7e-06	downregulated	14	16.4962	6.9e-08	downregulated	12	10.6558	2.4e-05	downregulated	7	6.73085	0.0012
regulation of sodium ion transmembrane transporter activity	GO	6 out of 8	59.8593	upregulated	5	4.51295	0.011	downregulated	2	2.07439	0.1256	upregulated	1	1.4974	0.2237	downregulated	1	0.2751	0.7595	downregulated	9	15.197	2.5e-07	downregulated	14	15.5216	1.8e-07	downregulated	13	13.1434	2e-06	downregulated	11	12.3364	4.4e-06
action potential	GO	4 out of 8	59.3785	upregulated	6	7.41268	0.0006	downregulated	3	3.92845	0.0197	upregulated	4	1.53112	0.2163	downregulated	2	0.916945	0.3997	downregulated	13	14.2354	6.6e-07	downregulated	14	15.2866	2.3e-07	downregulated	16	17.4605	2.6e-08	downregulated	15	12.396	4.1e-06
protein localization to cell periphery	GO	6 out of 8	56.0225	upregulated	17	9.31521	9e-05	upregulated	7	4.19533	0.0151	downregulated	20	5.86612	0.0028	downregulated	8	2.74992	0.0639	downregulated	18	12.6933	3.1e-06	downregulated	27	15.5626	1.7e-07	downregulated	24	11.2051	1.4e-05	downregulated	18	11.6671	8.6e-06
positive regulation of dendrite extension	GO	5 out of 8	55.7678					downregulated	1	2.95168	0.0523	upregulated	2	2.73822	0.0647	downregulated	2	2.13526	0.1182	downregulated	5	10.9546	1.7e-05	downregulated	7	15.0684	2.9e-07	downregulated	8	16.2055	9.2e-08	downregulated	8	15.888	1.3e-07
regulation of neurological system process	GO	7 out of 8	55.5943	upregulated	5	5.57161	0.0038	downregulated	2	2.77053	0.0626	upregulated	7	5.24991	0.0052	upregulated	5	8.45392	0.0002	downregulated	10	8.65145	0.0002	downregulated	14	9.14034	0.0001	downregulated	13	8.7495	0.0002	downregulated	11	12.548	3.6e-06
memory	GO	8 out of 8	54.0396	upregulated	5	5.34556	0.0048	upregulated	3	2.41923	0.089	upregulated	7	4.02848	0.0178	upregulated	4	6.02831	0.0024	downregulated	10	7.54912	0.0005	downregulated	17	11.4652	1e-05	downregulated	17	9.49008	7.6e-05	downregulated	14	7.71364	0.0004
guanyl nucleotide binding	GO	7 out of 8	53.2333	upregulated	22	6.45466	0.0016	upregulated	17	2.27886	0.1024	upregulated	18	5.20735	0.0055	upregulated	3	1.8241	0.1614	downregulated	22	9.12314	0.0001	downregulated	40	12.0531	5.8e-06	downregulated	36	8.34078	0.0002	downregulated	35	9.77535	5.7e-05
regulation of dendrite extension	GO	5 out of 8	52.692					downregulated	1	2.87381	0.0565	upregulated	2	2.66089	0.0699	downregulated	3	3.53564	0.0291	downregulated	5	10.6272	2.4e-05	downregulated	7	14.6643	4.3e-07	downregulated	8	15.7987	1.4e-07	downregulated	8	15.3503	2.2e-07
voltage-gated potassium channel complex	GO	5 out of 8	52.2548	upregulated	6	7.4807	0.0006					downregulated	3	2.55337	0.0778	downregulated	2	1.5971	0.2025	downregulated	9	8.90046	0.0001	downregulated	14	13.8004	1e-06	downregulated	15	15.6953	1.5e-07	downregulated	13	10.5284	2.7e-05
subpallium development	GO	7 out of 8	51.8218	upregulated	1	1.74171	0.1752					upregulated	1	0.657126	0.5183	upregulated	1	2.47407	0.0842	downregulated	7	14.8915	3.4e-07	downregulated	7	13.8579	9.6e-07	downregulated	6	9.18126	0.0001	downregulated	5	9.01816	0.0001
regulation of exocytosis	GO	6 out of 8	51.5127	upregulated	9	4.13856	0.0159	upregulated	6	1.06259	0.3456	downregulated	15	7.55007	0.0005	downregulated	12	11.0847	1.5e-05	downregulated	17	13.5655	1.3e-06	downregulated	26	19.3977	3.8e-09	downregulated	24	16.8563	4.8e-08	downregulated	16	15.1268	2.7e-07
cell morphogenesis involved in neuron differentiation	GO	5 out of 8	51.475	upregulated	26	9.45995	7.8e-05	downregulated	8	1.6274	0.1964	downregulated	34	8.71008	0.0002	downregulated	21	3.32616	0.0359	downregulated	26	12.5999	3.4e-06	downregulated	49	16.4495	7.2e-08	downregulated	48	16.7555	5.3e-08	downregulated	40	9.87379	5.2e-05
channel regulator activity	GO	7 out of 8	51.249	upregulated	15	14.9566	3.2e-07	upregulated	4	3.37356	0.0343	upregulated	2	1.02801	0.3577	downregulated	2	0.210597	0.8101	downregulated	9	7.51396	0.0005	downregulated	16	7.63454	0.0005	downregulated	16	8.85666	0.0001	downregulated	13	8.09633	0.0003
positive regulation of excitatory postsynaptic potential	GO	7 out of 8	50.6368	upregulated	3	4.69189	0.0092					upregulated	2	2.44974	0.0863	upregulated	2	6.1138	0.0022	downregulated	5	6.41147	0.0016	downregulated	9	10.0166	4.5e-05	downregulated	9	10.0264	4.4e-05	downregulated	6	10.9269	1.8e-05
syntaxin binding	GO	6 out of 8	49.9108	upregulated	4	3.77177	0.023	upregulated	3	0.725	0.4843	downregulated	6	0.97299	0.378	downregulated	5	2.63467	0.0717	downregulated	13	14.4163	5.5e-07	downregulated	16	17.4849	2.5e-08	downregulated	12	9.44863	7.9e-05	downregulated	10	7.67192	0.0005
regulation of calcium ion transmembrane transport	GO	6 out of 8	49.5059	upregulated	10	5.30233	0.005	downregulated	2	3.84758	0.0213	downregulated	7	2.464	0.0851	upregulated	1	0.655263	0.5193	downregulated	13	11.2496	1.3e-05	downregulated	19	13.7155	1.1e-06	downregulated	19	15.0471	2.9e-07	downregulated	11	9.84775	5.3e-05
regulation of potassium ion transmembrane transport	GO	8 out of 8	49.3854	upregulated	6	3.83026	0.0217	upregulated	2	1.86717	0.1546	upregulated	4	2.87133	0.0566	upregulated	1	2.0066	0.1344	downregulated	8	9.59644	6.8e-05	downregulated	11	9.62134	6.6e-05	downregulated	14	10.1036	4.1e-05	downregulated	11	9.4886	7.6e-05
positive regulation of neurogenesis	GO	7 out of 8	49.3103	upregulated	22	5.33136	0.0048	upregulated	16	4.53082	0.0108	downregulated	40	13.1125	2e-06	upregulated	7	3.61085	0.027	downregulated	29	12.3388	4.4e-06	downregulated	49	16.9021	4.6e-08	downregulated	50	10.9832	1.7e-05	downregulated	37	8.72561	0.0002
protein localization to plasma membrane	GO	6 out of 8	49.1736	upregulated	14	8.12717	0.0003	upregulated	5	2.61294	0.0733	downregulated	16	4.8634	0.0077	downregulated	6	2.895	0.0553	downregulated	16	11.5972	9.2e-06	downregulated	22	12.8049	2.7e-06	downregulated	21	11.8628	7e-06	downregulated	16	9.92704	4.9e-05
presynaptic active zone	GO	6 out of 8	48.8801	upregulated	4	9.33466	8.8e-05	downregulated	1	1.33892	0.2621	upregulated	2	2.41407	0.0895					downregulated	6	8.20909	0.0003	downregulated	7	9.02575	0.0001	downregulated	7	12.4426	3.9e-06	downregulated	6	8.79285	0.0002
vesicle docking involved in exocytosis	GO	6 out of 8	48.8005	upregulated	4	8.44721	0.0002	upregulated	1	3.07039	0.0464	downregulated	2	0.269698	0.7636	downregulated	1	0.835979	0.4334	downregulated	5	8.21939	0.0003	downregulated	9	11.1178	1.5e-05	downregulated	8	8.95772	0.0001	downregulated	7	10.0937	4.1e-05
sodium channel regulator activity	GO	5 out of 8	48.5488	upregulated	3	6.91906	0.001	downregulated	1	2.50737	0.0815									downregulated	5	10.665	2.3e-05	downregulated	5	10.7408	2.2e-05	downregulated	5	10.8384	2e-05	downregulated	6	11.8929	6.8e-06
presynaptic membrane	GO	6 out of 8	48.37	upregulated	6	3.60336	0.0272					downregulated	3	2.44499	0.0867	upregulated	1	2.60145	0.0742	downregulated	7	6.37842	0.0017	downregulated	17	12.2187	4.9e-06	downregulated	12	11.1826	1.4e-05	downregulated	14	12.3854	4.2e-06
voltage-gated sodium channel complex	GO	4 out of 8	48.333	upregulated	2	4.31072	0.0134													downregulated	4	11.2214	1.3e-05	downregulated	4	13.2612	1.7e-06	downregulated	4	12.4113	4.1e-06	downregulated	4	11.4391	1.1e-05
phosphatase inhibitor activity	GO	7 out of 8	47.2071	upregulated	3	3.27475	0.0378	upregulated	2	3.02942	0.0483	upregulated	1	1.66864	0.1885					downregulated	7	10.9935	1.7e-05	downregulated	7	9.93019	4.9e-05	downregulated	8	12.3794	4.2e-06	downregulated	7	5.93123	0.0027
membrane depolarization during action potential	GO	6 out of 8	46.9211	upregulated	4	6.38328	0.0017	downregulated	1	1.1864	0.3053	upregulated	2	1.56908	0.2082					downregulated	6	9.01144	0.0001	downregulated	7	10.93	1.8e-05	downregulated	7	10.6227	2.4e-05	downregulated	6	9.59116	6.8e-05
regulation of glutamate receptor signaling pathway	GO	6 out of 8	46.8658	upregulated	4	4.97401	0.0069	downregulated	3	2.91219	0.0544	upregulated	1	0.6126	0.5419	downregulated	1	0.229277	0.7951	downregulated	5	4.63308	0.0097	downregulated	12	11.5465	9.7e-06	downregulated	15	14.4977	5.1e-07	downregulated	10	13.7434	1.1e-06
positive regulation of dendrite development	GO	7 out of 8	46.6952	upregulated	5	0.74784	0.4734	upregulated	4	1.54365	0.2136	downregulated	6	5.22847	0.0054	upregulated	4	6.66434	0.0013	downregulated	11	12.1988	5e-06	downregulated	14	11.8688	7e-06	downregulated	12	9.61961	6.6e-05	downregulated	10	9.28068	9.3e-05
perikaryon	GO	7 out of 8	46.2341	upregulated	5	2.47407	0.0842	downregulated	3	2.61115	0.0735	upregulated	2	1.88082	0.1525	upregulated	1	0.871616	0.4183	downregulated	12	13.1875	1.9e-06	downregulated	16	10.5386	2.6e-05	downregulated	17	12.0839	5.6e-06	downregulated	9	7.80872	0.0004
cellular potassium ion transport	GO	7 out of 8	45.7179	upregulated	8	3.66833	0.0255	upregulated	2	4.52834	0.0108	downregulated	6	1.78784	0.1673	upregulated	3	3.65999	0.0257	downregulated	10	6.91507	0.001	downregulated	17	8.58277	0.0002	downregulated	18	9.34905	8.7e-05	downregulated	24	10.8021	2e-05
potassium ion transmembrane transport	GO	7 out of 8	45.7179	upregulated	8	3.66833	0.0255	upregulated	2	4.52834	0.0108	downregulated	6	1.78784	0.1673	upregulated	3	3.65999	0.0257	downregulated	10	6.91507	0.001	downregulated	17	8.58277	0.0002	downregulated	18	9.34905	8.7e-05	downregulated	24	10.8021	2e-05
regulation of dendrite morphogenesis	GO	8 out of 8	45.6459	upregulated	9	2.94339	0.0527	upregulated	5	2.74189	0.0644	upregulated	4	3.52173	0.0295	upregulated	4	6.28942	0.0019	downregulated	9	8.46353	0.0002	downregulated	14	10.5053	2.7e-05	downregulated	14	5.70895	0.0033	downregulated	7	5.47174	0.0042
neuromuscular process	GO	8 out of 8	45.436	upregulated	3	3.0281	0.0484	upregulated	1	0.0259464	0.9744	upregulated	3	1.29667	0.2734	upregulated	1	1.73808	0.1759	downregulated	11	10.4289	3e-05	downregulated	15	9.97066	4.7e-05	downregulated	13	8.78973	0.0002	downregulated	12	10.158	3.9e-05
cardiac muscle cell contraction	GO	6 out of 8	45.4174	upregulated	4	8.20101	0.0003	downregulated	3	6.08	0.0023	upregulated	2	1.30093	0.2723	downregulated	1	1.614	0.1991	downregulated	6	10.7824	2.1e-05	downregulated	7	11.9337	6.6e-06	downregulated	8	11.5023	1e-05	downregulated	7	9.39102	8.3e-05
growth cone	GO	7 out of 8	44.5985	upregulated	12	3.4786	0.0309	upregulated	7	1.54277	0.2138	upregulated	3	1.90957	0.1481	downregulated	8	1.19104	0.3039	downregulated	14	10.3949	3.1e-05	downregulated	22	12.9347	2.4e-06	downregulated	23	9.95481	4.7e-05	downregulated	9	5.57408	0.0038
axon development	GO	6 out of 8	44.0411	upregulated	23	7.89887	0.0004	upregulated	5	1.31544	0.2684	downregulated	31	8.55717	0.0002	downregulated	23	5.80267	0.003	downregulated	24	11.7156	8.2e-06	downregulated	44	14.697	4.1e-07	downregulated	48	14.0241	8.1e-07	downregulated	38	8.75	0.0002
regulation of AMPA receptor activity	GO	6 out of 8	43.7061	upregulated	2	3.88435	0.0206	downregulated	2	3.22913	0.0396	upregulated	1	1.16088	0.3132					downregulated	2	2.04388	0.1295	downregulated	9	12.6224	3.3e-06	downregulated	12	15.7944	1.4e-07	downregulated	7	11.4293	1.1e-05
site of polarized growth	GO	7 out of 8	43.6222	upregulated	12	3.43269	0.0323	upregulated	7	1.52664	0.2173	upregulated	3	1.89275	0.1507	downregulated	8	1.1364	0.321	downregulated	14	10.1273	4e-05	downregulated	22	12.5846	3.4e-06	downregulated	23	9.711	6.1e-05	downregulated	9	5.48355	0.0042
postsynaptic density membrane	GO	6 out of 8	43.0344	upregulated	1	3.53791	0.0291					upregulated	1	2.44078	0.0871					downregulated	4	6.48196	0.0015	downregulated	7	10.8902	1.9e-05	downregulated	8	9.95462	4.8e-05	downregulated	7	9.72889	6e-05
postsynaptic specialization membrane	GO	6 out of 8	41.871	upregulated	1	3.49655	0.0303					upregulated	1	2.40072	0.0907					downregulated	4	6.27435	0.0019	downregulated	7	10.5821	2.5e-05	downregulated	8	9.65193	6.4e-05	downregulated	7	9.46535	7.7e-05
striated muscle contraction	GO	7 out of 8	41.7216	upregulated	6	6.01392	0.0024	downregulated	4	4.98287	0.0069	upregulated	5	1.79333	0.1664	upregulated	2	2.73042	0.0652	downregulated	9	6.6647	0.0013	downregulated	13	10.4109	3e-05	downregulated	13	10.5451	2.6e-05	downregulated	13	8.54605	0.0002
cardiac muscle cell action potential	GO	5 out of 8	41.5643	upregulated	4	7.51372	0.0005	downregulated	3	5.70272	0.0033	downregulated	1	1.06181	0.3458	downregulated	1	1.44557	0.2356	downregulated	7	12.0792	5.7e-06	downregulated	8	11.1669	1.4e-05	downregulated	9	10.0457	4.3e-05	downregulated	8	8.96881	0.0001
cell part morphogenesis	GO	5 out of 8	41.4652	upregulated	28	6.52748	0.0015	downregulated	9	1.47746	0.2282	downregulated	40	10.0132	4.5e-05	downregulated	26	3.91881	0.0199	downregulated	29	10.9699	1.7e-05	downregulated	56	16.4435	7.2e-08	downregulated	53	14.5295	4.9e-07	downregulated	45	8.40419	0.0002
regulation of neurotransmitter receptor activity	GO	6 out of 8	41.4429	upregulated	3	3.12575	0.0439	downregulated	3	2.74094	0.0645	upregulated	3	4.36794	0.0127					downregulated	4	2.98392	0.0506	downregulated	12	9.23883	9.7e-05	downregulated	15	13.4978	1.4e-06	downregulated	11	10.9696	1.7e-05
protein phosphatase inhibitor activity	GO	4 out of 8	40.8061	upregulated	3	3.57453	0.028	upregulated	1	1.27936	0.2782									downregulated	7	11.5078	1e-05	downregulated	7	10.5283	2.7e-05	downregulated	8	13.087	2.1e-06	downregulated	6	5.68299	0.0034
regulation of voltage-gated calcium channel activity	GO	7 out of 8	40.4027	upregulated	5	10.5141	2.7e-05	downregulated	1	2.87067	0.0567	upregulated	4	4.26087	0.0141	upregulated	1	1.75748	0.1725	downregulated	4	6.60633	0.0014	downregulated	5	8.23686	0.0003	downregulated	7	8.48944	0.0002	downregulated	3	3.40834	0.0331
protein phosphatase regulator activity	GO	6 out of 8	40.3365	upregulated	7	3.66187	0.0257	upregulated	3	1.56549	0.209	downregulated	4	1.08085	0.3393	downregulated	5	3.749	0.0235	downregulated	9	9.89594	5e-05	downregulated	13	10.5127	2.7e-05	downregulated	13	13.3135	1.7e-06	downregulated	11	6.21682	0.002
regulation of action potential	GO	5 out of 8	39.9299	upregulated	5	6.56293	0.0014	downregulated	1	2.98092	0.0507	downregulated	5	2.10998	0.1212	downregulated	1	1.30755	0.2705	downregulated	7	10.5244	2.7e-05	downregulated	9	10.5594	2.6e-05	downregulated	11	10.5288	2.7e-05	downregulated	8	8.15285	0.0003
vesicle docking	GO	6 out of 8	39.8946	upregulated	5	7.61816	0.0005	upregulated	3	4.43186	0.0119	downregulated	4	0.455545	0.6341	downregulated	2	0.843805	0.4301	downregulated	5	6.23285	0.002	downregulated	9	7.83936	0.0004	downregulated	8	6.93654	0.001	downregulated	8	8.1352	0.0003
synapse organization	GO	5 out of 8	39.8827	upregulated	13	9.77263	5.7e-05	downregulated	5	2.384	0.0922	downregulated	17	8.35276	0.0002	downregulated	8	2.84278	0.0583	downregulated	17	9.49671	7.5e-05	downregulated	33	15.0668	2.9e-07	downregulated	32	12.9979	2.3e-06	downregulated	17	6.12822	0.0022
regulation of synaptic vesicle transport	GO	6 out of 8	39.4027	upregulated	3	1.71058	0.1808					upregulated	3	3.01561	0.049	downregulated	1	1.16132	0.3131	downregulated	4	3.87533	0.0207	downregulated	10	12.1679	5.2e-06	downregulated	9	12.8131	2.7e-06	downregulated	6	6.98157	0.0009
localization within membrane	GO	5 out of 8	38.8349	upregulated	8	2.80643	0.0604	downregulated	4	2.10399	0.122	downregulated	10	5.3106	0.0049	downregulated	7	6.19683	0.002	downregulated	8	4.82868	0.008	downregulated	21	18.4714	9.5e-09	downregulated	20	14.81	3.7e-07	downregulated	14	11.5298	9.8e-06
phosphatase regulator activity	GO	6 out of 8	38.7705	upregulated	8	4.57581	0.0103	upregulated	5	4.13209	0.016	downregulated	5	1.18401	0.3061	downregulated	6	3.91193	0.02	downregulated	9	8.6319	0.0002	downregulated	13	8.68478	0.0002	downregulated	14	12.0168	6e-06	downregulated	14	5.82514	0.003
voltage-gated calcium channel complex	GO	4 out of 8	38.6928	upregulated	5	6.9232	0.001	downregulated	2	1.80085	0.1652	upregulated	4	3.8364	0.0216					downregulated	5	7.91757	0.0004	downregulated	8	9.78255	5.6e-05	downregulated	9	12.7076	3e-06	downregulated	6	8.28507	0.0003
regulation of response to drug	GO	6 out of 8	38.351	upregulated	6	6.44315	0.0016	upregulated	3	2.36557	0.0939	downregulated	8	3.21338	0.0402	downregulated	3	2.30836	0.0994	downregulated	7	6.76724	0.0012	downregulated	16	13.3377	1.6e-06	downregulated	15	10.8171	2e-05	downregulated	8	4.14188	0.0159
protein localization to postsynaptic membrane	GO	6 out of 8	37.7437	upregulated	3	3.44928	0.0318	downregulated	2	3.61946	0.0268	upregulated	1	3.08419	0.0458					downregulated	4	7.87693	0.0004	downregulated	6	10.4918	2.8e-05	downregulated	4	6.38214	0.0017	downregulated	3	10.0789	4.2e-05
nucleoside binding	GO	4 out of 8	37.5282	upregulated	21	6.50561	0.0015	upregulated	17	2.39135	0.0915	upregulated	18	5.45527	0.0043	upregulated	2	1.83892	0.159	downregulated	21	8.32383	0.0002	downregulated	39	11.5892	9.3e-06	downregulated	35	7.49538	0.0006	downregulated	33	10.1198	4e-05
cardiac muscle cell action potential involved in contraction	GO	6 out of 8	37.4437	upregulated	4	8.41364	0.0002	downregulated	3	6.18725	0.0021	upregulated	2	1.4503	0.2345	downregulated	1	1.70873	0.1811	downregulated	5	10.0106	4.5e-05	downregulated	6	9.28185	9.3e-05	downregulated	7	8.91852	0.0001	downregulated	6	7.26478	0.0007
cyclic purine nucleotide metabolic process	GO	7 out of 8	37.3397	upregulated	2	5.93689	0.0026					upregulated	2	2.67888	0.0686	upregulated	2	4.72203	0.0089	downregulated	3	6.79838	0.0011	downregulated	3	6.16998	0.0021	downregulated	3	6.19144	0.002	downregulated	3	4.84211	0.0079
membrane depolarization during cardiac muscle cell action potential	GO	6 out of 8	37.1983	upregulated	3	5.90407	0.0027	downregulated	1	1.58958	0.204	upregulated	2	2.31252	0.099					downregulated	4	6.94635	0.001	downregulated	5	8.89809	0.0001	downregulated	5	8.08782	0.0003	downregulated	4	6.63897	0.0013
vasodilation	GO	7 out of 8	36.7838	upregulated	3	4.08024	0.0169	upregulated	2	3.21391	0.0402	upregulated	2	2.07139	0.126					downregulated	4	6.37345	0.0017	downregulated	4	7.6529	0.0005	downregulated	4	7.10234	0.0008	downregulated	3	6.28959	0.0019
multicellular organismal response to stress	GO	7 out of 8	36.5399	downregulated	2	0.782505	0.4573	upregulated	1	2.02086	0.1325	upregulated	6	8.48682	0.0002	upregulated	1	1.9766	0.1385	downregulated	7	3.75392	0.0234	downregulated	9	6.93499	0.001	downregulated	9	8.35376	0.0002	downregulated	9	5.79551	0.003
axon guidance	GO	4 out of 8	36.4499	upregulated	15	4.95215	0.0071	downregulated	3	0.30954	0.7338	downregulated	20	6.33959	0.0018	downregulated	14	4.11551	0.0163	downregulated	17	12.4452	3.9e-06	downregulated	30	15.2978	2.3e-07	downregulated	30	14.5696	4.7e-07	downregulated	28	12.395	4.1e-06
pigment granule localization	GO	6 out of 8	36.1706	upregulated	4	4.65905	0.0095					upregulated	3	3.8838	0.0206					downregulated	6	9.92221	4.9e-05	downregulated	7	11.7092	8.2e-06	downregulated	2	2.58635	0.0753	downregulated	3	3.40999	0.033
sarcoplasm	GO	7 out of 8	36.1326	upregulated	3	2.35293	0.0951	downregulated	1	2.63407	0.0718	upregulated	5	2.66585	0.0695	upregulated	1	2.41741	0.0892	downregulated	8	6.08059	0.0023	downregulated	10	9.30382	9.1e-05	downregulated	12	10.9304	1.8e-05	downregulated	6	5.01569	0.0066
neuron projection guidance	GO	4 out of 8	36.1273	upregulated	15	4.91286	0.0074	downregulated	3	0.304245	0.7377	downregulated	20	6.25158	0.0019	downregulated	14	4.0691	0.0171	downregulated	17	12.3268	4.4e-06	downregulated	30	15.1239	2.7e-07	downregulated	30	14.4608	5.2e-07	downregulated	28	12.2547	4.8e-06
telencephalon development	GO	7 out of 8	35.9018	upregulated	7	0.783143	0.457	upregulated	8	4.63975	0.0097	upregulated	13	7.02668	0.0009	downregulated	11	3.71597	0.0243	downregulated	14	6.12618	0.0022	downregulated	22	7.7446	0.0004	downregulated	25	4.81241	0.0081	downregulated	18	4.76905	0.0085
cardiac muscle contraction	GO	7 out of 8	35.7707	upregulated	5	5.68136	0.0034	downregulated	4	6.13054	0.0022	upregulated	4	1.77354	0.1697	upregulated	2	3.26048	0.0384	downregulated	7	7.93004	0.0004	downregulated	9	9.03408	0.0001	downregulated	10	7.60759	0.0005	downregulated	10	6.6142	0.0013
adult behavior	GO	6 out of 8	35.5647	upregulated	11	6.09967	0.0022	downregulated	1	0.483806	0.6164	upregulated	9	6.70864	0.0012	downregulated	7	4.62831	0.0098	downregulated	11	6.22501	0.002	downregulated	18	9.50392	7.5e-05	downregulated	17	8.76243	0.0002	downregulated	12	3.37714	0.0341
cell surface receptor signaling pathway involved in cell-cell signaling	GO	7 out of 8	35.5258	upregulated	22	4.03407	0.0177	downregulated	6	2.98656	0.0505	upregulated	12	2.85662	0.0575	upregulated	4	1.69473	0.1836	downregulated	22	10.5683	2.6e-05	downregulated	32	8.53521	0.0002	downregulated	31	6.44139	0.0016	downregulated	33	4.3821	0.0125
translation repressor activity	GO	7 out of 8	35.308					upregulated	1	5.52658	0.004	upregulated	5	5.79315	0.003	upregulated	1	3.64445	0.0261	downregulated	2	1.06715	0.344	downregulated	4	4.60633	0.01	downregulated	4	5.61541	0.0036	downregulated	6	9.05494	0.0001
postsynaptic density organization	GO	7 out of 8	35.1314	upregulated	2	4.34383	0.013					upregulated	2	4.5912	0.0101	upregulated	2	6.00499	0.0025	downregulated	2	2.5893	0.0751	downregulated	6	7.23678	0.0007	downregulated	5	5.34725	0.0048	downregulated	3	5.01808	0.0066
phosphorus-oxygen lyase activity	GO	7 out of 8	34.98	upregulated	2	6.11885	0.0022					upregulated	1	2.13224	0.1186	upregulated	1	2.00153	0.1351	downregulated	3	7.07148	0.0008	downregulated	3	6.4398	0.0016	downregulated	3	6.37395	0.0017	downregulated	3	4.84211	0.0079
cyclase activity	GO	7 out of 8	34.1695	upregulated	2	6.0257	0.0024					upregulated	1	2.049	0.1289	upregulated	1	1.91913	0.1467	downregulated	3	6.93151	0.001	downregulated	3	6.30147	0.0018	downregulated	4	6.28053	0.0019	downregulated	4	4.66216	0.0094
SNARE complex	GO	6 out of 8	34.1426	upregulated	3	3.51828	0.0297	upregulated	4	3.12167	0.0441	downregulated	3	0.415372	0.6601	downregulated	2	1.10444	0.3314	downregulated	7	6.09589	0.0023	downregulated	8	6.89757	0.001	downregulated	6	6.38459	0.0017	downregulated	7	9.64444	6.5e-05
learning	GO	6 out of 8	34.0216	upregulated	5	2.58694	0.0752	downregulated	2	0.834409	0.4341	upregulated	7	3.00304	0.0496	downregulated	6	2.68379	0.0683	downregulated	13	9.55907	7.1e-05	downregulated	19	11.272	1.3e-05	downregulated	18	6.68169	0.0013	downregulated	13	4.43707	0.0118
L-type voltage-gated calcium channel complex	GO	6 out of 8	33.8295	upregulated	3	8.34723	0.0002	downregulated	1	2.06234	0.1272	upregulated	2	3.22222	0.0399					downregulated	1	1.55073	0.2121	downregulated	4	7.40977	0.0006	downregulated	4	9.14003	0.0001	downregulated	3	6.2219	0.002
sodium ion transmembrane transport	GO	7 out of 8	33.6656	upregulated	5	3.35623	0.0349	upregulated	1	0.0790384	0.924	upregulated	4	6.83004	0.0011	downregulated	3	0.844632	0.4297	downregulated	7	5.10543	0.0061	downregulated	11	6.65912	0.0013	downregulated	15	7.68554	0.0005	downregulated	13	4.79479	0.0083
sensory perception of pain	GO	7 out of 8	33.2337	upregulated	7	9.86933	5.2e-05	upregulated	1	2.23795	0.1067	upregulated	4	6.69858	0.0012	downregulated	5	4.52855	0.0108	downregulated	5	4.32851	0.0132	downregulated	10	6.42851	0.0016	downregulated	8	4.65084	0.0096	downregulated	6	3.54855	0.0288
GTPase activator activity	GO	4 out of 8	33.1097	upregulated	16	3.65333	0.0259	downregulated	5	0.567428	0.567	downregulated	30	6.18376	0.0021	downregulated	20	8.98732	0.0001	downregulated	22	9.45084	7.9e-05	downregulated	32	8.92359	0.0001	downregulated	28	7.79904	0.0004	downregulated	30	6.9362	0.001
regulation of long-term synaptic potentiation	GO	7 out of 8	32.9271	upregulated	2	5.60421	0.0037	upregulated	2	3.14883	0.0429	upregulated	1	2.06631	0.1267					downregulated	5	6.3874	0.0017	downregulated	7	8.66555	0.0002	downregulated	5	3.68251	0.0252	downregulated	4	3.37227	0.0343
positive regulation of sodium ion transmembrane transport	GO	6 out of 8	32.7959	upregulated	1	0.934262	0.3929					upregulated	1	2.24664	0.1058	downregulated	1	0.761699	0.4669	downregulated	3	5.48258	0.0042	downregulated	5	6.64209	0.0013	downregulated	4	7.09732	0.0008	downregulated	6	11.1547	1.4e-05
regulation of synaptic vesicle exocytosis	GO	6 out of 8	32.7705	upregulated	2	0.99181	0.3709					upregulated	3	3.32933	0.0358	downregulated	1	1.2665	0.2818	downregulated	4	4.24302	0.0144	downregulated	8	9.16962	0.0001	downregulated	7	8.87029	0.0001	downregulated	5	7.43297	0.0006
protein serine/threonine phosphatase complex	GO	7 out of 8	32.605	upregulated	7	4.50414	0.0111	upregulated	5	2.89814	0.0551	upregulated	1	0.277002	0.7581	downregulated	3	1.2217	0.2947	downregulated	6	7.02193	0.0009	downregulated	10	9.64259	6.5e-05	downregulated	7	6.43452	0.0016	downregulated	6	3.0484	0.0474
regulation of neuron death	GO	6 out of 8	32.4266	upregulated	13	2.44819	0.0865	upregulated	5	3.06306	0.0467	downregulated	18	4.02387	0.0179	downregulated	10	2.57126	0.0764	downregulated	16	6.47696	0.0015	downregulated	24	10.9103	1.8e-05	downregulated	21	9.58132	6.9e-05	downregulated	19	6.54192	0.0014
regulation of synaptic vesicle recycling	GO	6 out of 8	32.2434	upregulated	3	5.53745	0.0039					upregulated	1	2.49179	0.0828	downregulated	2	2.34029	0.0963	downregulated	3	5.17555	0.0057	downregulated	7	11.0328	1.6e-05	downregulated	5	5.93171	0.0027	downregulated	3	4.41437	0.0121
regulation of cyclase activity	GO	8 out of 8	31.9392	upregulated	3	1.41753	0.2423	upregulated	2	5.80213	0.003	upregulated	4	4.04265	0.0176	upregulated	2	3.73906	0.0238	downregulated	3	2.41709	0.0892	downregulated	3	4.42929	0.0119	downregulated	4	5.08501	0.0062	downregulated	4	5.00645	0.0067
neurotransmitter receptor transport	GO	5 out of 8	31.8324	upregulated	3	2.73177	0.0651	downregulated	2	3.09205	0.0454	downregulated	2	3.00968	0.0493					downregulated	3	4.58364	0.0102	downregulated	8	11.8575	7.1e-06	downregulated	7	10.6419	2.4e-05	downregulated	4	8.11939	0.0003
acetylcholine receptor signaling pathway	GO	5 out of 8	31.6057									upregulated	1	4.92959	0.0072	downregulated	1	3.83811	0.0215	downregulated	3	6.05885	0.0023	downregulated	3	7.73691	0.0004	downregulated	4	6.21068	0.002	downregulated	4	10.5078	2.7e-05
response to acetylcholine	GO	5 out of 8	31.6057									upregulated	1	4.92959	0.0072	downregulated	1	3.83811	0.0215	downregulated	3	6.05885	0.0023	downregulated	3	7.73691	0.0004	downregulated	4	6.21068	0.002	downregulated	4	10.5078	2.7e-05
anchored component of membrane	GO	7 out of 8	31.6012	upregulated	6	5.01113	0.0067	upregulated	1	0.20195	0.8171	upregulated	10	11.5408	9.7e-06	upregulated	5	7.53952	0.0005	upregulated	1	2.26242	0.1041	downregulated	13	3.12042	0.0441	downregulated	14	2.44069	0.0871	downregulated	12	4.00905	0.0182
scaffold protein binding	GO	8 out of 8	31.4512	upregulated	3	1.31455	0.2686	upregulated	2	2.05214	0.1285	upregulated	6	4.91462	0.0073	upregulated	2	2.08686	0.1241	downregulated	5	3.24229	0.0391	downregulated	6	5.18783	0.0056	downregulated	9	5.79799	0.003	downregulated	6	6.85493	0.0011
regulation of high voltage-gated calcium channel activity	GO	6 out of 8	31.3884	upregulated	4	11.1062	1.5e-05					upregulated	2	2.67888	0.0686					downregulated	2	3.94224	0.0194	downregulated	3	4.79855	0.0082	downregulated	3	5.73286	0.0032	downregulated	2	3.1297	0.0437
muscle contraction	GO	6 out of 8	31.3406	upregulated	13	5.22716	0.0054	downregulated	4	2.07169	0.126	downregulated	14	3.138	0.0434	upregulated	3	2.55526	0.0777	downregulated	16	6.55347	0.0014	downregulated	25	8.40348	0.0002	downregulated	25	7.86758	0.0004	downregulated	21	5.94338	0.0026
nerve development	GO	5 out of 8	30.9085	downregulated	2	2.06666	0.1266	upregulated	2	0.751196	0.4718	downregulated	5	3.87937	0.0207	downregulated	1	0.0623672	0.9395	downregulated	7	6.88233	0.001	downregulated	9	9.46467	7.8e-05	downregulated	9	12.7902	2.8e-06	downregulated	10	7.02851	0.0009
heart contraction	GO	7 out of 8	30.8663	upregulated	6	5.19365	0.0056	downregulated	5	7.89825	0.0004	upregulated	4	1.4987	0.2234	upregulated	2	3.05201	0.0473	downregulated	7	7.40615	0.0006	downregulated	10	8.49754	0.0002	downregulated	11	7.00608	0.0009	downregulated	10	6.11043	0.0022
positive regulation of voltage-gated calcium channel activity	GO	6 out of 8	30.849	upregulated	4	12.0956	5.6e-06					upregulated	1	1.41794	0.2422					downregulated	2	4.37797	0.0126	downregulated	2	5.24464	0.0053	downregulated	3	5.37348	0.0046	downregulated	1	2.33943	0.0964
negative regulation of synapse organization	GO	6 out of 8	30.8183	upregulated	3	2.45923	0.0855	upregulated	3	4.9929	0.0068	downregulated	2	1.89751	0.1499	downregulated	5	5.79561	0.003	downregulated	4	8.85806	0.0001	downregulated	5	7.66293	0.0005	downregulated	6	7.79187	0.0004	downregulated	4	6.7464	0.0012
translation regulator activity	GO	8 out of 8	30.5069	upregulated	2	0.543978	0.5804	upregulated	3	4.71765	0.0089	upregulated	6	4.64257	0.0096	upregulated	2	3.0476	0.0475	downregulated	3	1.09005	0.3362	downregulated	5	4.88502	0.0076	downregulated	6	5.19454	0.0055	downregulated	9	6.38553	0.0017
neurotransmitter receptor transport to postsynaptic membrane	GO	5 out of 8	30.5	upregulated	3	4.54044	0.0107	downregulated	2	4.3893	0.0124									downregulated	3	6.1991	0.002	downregulated	5	9.09146	0.0001	downregulated	4	7.68616	0.0005	downregulated	2	7.37216	0.0006
dendritic shaft	GO	6 out of 8	30.3361	upregulated	3	2.99858	0.0499	downregulated	2	2.2165	0.109	downregulated	3	4.87692	0.0076	upregulated	1	1.98116	0.1379	downregulated	4	4.82998	0.008	downregulated	10	13.4884	1.4e-06	downregulated	8	8.19537	0.0003	downregulated	5	5.93604	0.0026
regulation of long term synaptic depression	GO	5 out of 8	30.3256	upregulated	1	0.792063	0.4529	downregulated	1	1.52403	0.2178									downregulated	4	8.05249	0.0003	downregulated	4	9.66201	6.4e-05	downregulated	4	9.18241	0.0001	downregulated	2	4.16066	0.0156
transcription factor activity, RNA polymerase II core promoter sequence-specific binding involved in preinitiation complex assembly	GO	7 out of 8	30.2493	upregulated	2	2.1235	0.1196	upregulated	1	4.26175	0.0141					upregulated	1	5.52978	0.004	downregulated	3	6.03812	0.0024	downregulated	3	6.02541	0.0024	downregulated	3	4.08567	0.0168	downregulated	1	2.18507	0.1125
protein self-association	GO	6 out of 8	30.142	upregulated	3	1.46104	0.232	upregulated	3	6.38657	0.0017	downregulated	3	2.80372	0.0606	downregulated	2	1.8316	0.1602	downregulated	5	5.29567	0.005	downregulated	5	6.77996	0.0011	downregulated	7	7.90158	0.0004	downregulated	6	6.95252	0.001
regulation of potassium ion transmembrane transporter activity	GO	7 out of 8	30.1163	upregulated	4	1.56207	0.2097	downregulated	3	2.38855	0.0918	upregulated	3	2.40439	0.0903	upregulated	1	2.29269	0.101	downregulated	5	7.79741	0.0004	downregulated	7	5.53975	0.0039	downregulated	9	4.9324	0.0072	downregulated	9	7.97614	0.0003
AV node cell to bundle of His cell communication	GO	6 out of 8	29.4126	upregulated	1	2.98055	0.0508					upregulated	2	3.3446	0.0353	downregulated	1	2.77557	0.0623	downregulated	1	7.48867	0.0006	downregulated	2	6.7958	0.0011	downregulated	2	5.69826	0.0034	downregulated	2	5.88031	0.0028
blood circulation	GO	5 out of 8	29.4053	upregulated	15	10.8291	2e-05	downregulated	7	3.35172	0.035	upregulated	18	5.76186	0.0031	downregulated	11	3.63939	0.0263	downregulated	16	6.09309	0.0023	downregulated	23	6.44898	0.0016	downregulated	24	7.26338	0.0007	upregulated	24	4.08913	0.0168
establishment of protein localization to postsynaptic membrane	GO	5 out of 8	29.1422	upregulated	3	4.42681	0.012	downregulated	2	4.31055	0.0134									downregulated	3	5.92953	0.0027	downregulated	5	8.59466	0.0002	downregulated	4	7.3097	0.0007	downregulated	2	7.19207	0.0008
sarcolemma	GO	6 out of 8	28.8197	upregulated	5	1.31315	0.269	upregulated	5	5.19995	0.0055	downregulated	9	3.34113	0.0354	downregulated	4	2.36597	0.0939	downregulated	9	3.98689	0.0186	downregulated	14	7.19576	0.0007	downregulated	16	8.60269	0.0002	downregulated	13	8.22839	0.0003
mechanosensory behavior	GO	5 out of 8	28.7688	upregulated	1	2.54825	0.0782					downregulated	1	0.303783	0.738					downregulated	4	8.25381	0.0003	downregulated	5	9.81381	5.5e-05	downregulated	4	5.03394	0.0065	downregulated	3	3.42282	0.0326
ligand-gated calcium channel activity	GO	5 out of 8	28.7685					downregulated	1	4.04242	0.0176	upregulated	1	2.40072	0.0907	downregulated	2	2.02493	0.132	downregulated	5	9.53956	7.2e-05	downregulated	6	9.59479	6.8e-05	downregulated	6	7.28837	0.0007	downregulated	6	6.01246	0.0024
regulation of heart rate by cardiac conduction	GO	7 out of 8	28.7183	upregulated	3	4.18128	0.0153	upregulated	3	3.54432	0.0289	upregulated	2	1.34349	0.2609	downregulated	1	1.64128	0.1937	downregulated	3	6.19669	0.002	downregulated	4	5.56365	0.0038	downregulated	4	4.93891	0.0072	downregulated	4	4.59128	0.0101
G-protein coupled serotonin receptor signaling pathway	GO	6 out of 8	28.376	upregulated	1	3.75677	0.0234	downregulated	1	2.93877	0.0529	upregulated	2	5.54917	0.0039					downregulated	2	4.31339	0.0134	downregulated	3	5.47415	0.0042	downregulated	2	4.52707	0.0108	downregulated	2	7.69426	0.0005
protein transport along microtubule	GO	5 out of 8	28.3236	upregulated	1	4.25155	0.0142	downregulated	1	1.82497	0.1612									downregulated	1	2.45056	0.0862	downregulated	4	6.16077	0.0021	downregulated	4	6.68194	0.0013	downregulated	4	10.6037	2.5e-05
excitatory synapse assembly	GO	7 out of 8	28.1824	upregulated	2	4.17215	0.0154					upregulated	1	1.57698	0.2066	upregulated	1	3.49785	0.0303	downregulated	2	2.49041	0.0829	downregulated	6	8.02339	0.0003	downregulated	4	5.13989	0.0059	downregulated	2	3.28168	0.0376
sulfotransferase activity	GO	7 out of 8	28.1796	upregulated	2	2.29715	0.1005					upregulated	3	5.61906	0.0036	upregulated	1	1.25697	0.2845	downregulated	4	5.38395	0.0046	downregulated	5	4.73848	0.0088	downregulated	4	4.85241	0.0078	downregulated	4	4.03162	0.0177
regulation of cell growth	GO	4 out of 8	28.1123	downregulated	8	1.00433	0.3663	downregulated	8	4.84833	0.0078	downregulated	33	5.18965	0.0056	downregulated	23	4.22383	0.0146	downregulated	20	5.73147	0.0032	downregulated	27	7.99622	0.0003	downregulated	32	6.62847	0.0013	downregulated	32	7.75609	0.0004
calcium-dependent phospholipid binding	GO	4 out of 8	28.1073	downregulated	1	0.537544	0.5842					upregulated	1	0.437089	0.6459	downregulated	2	0.765376	0.4652	downregulated	2	3.71479	0.0244	downregulated	9	9.06235	0.0001	downregulated	7	9.3034	9.1e-05	downregulated	6	6.0268	0.0024
potassium channel regulator activity	GO	6 out of 8	27.9689	upregulated	6	7.64588	0.0005	downregulated	2	3.92708	0.0197	upregulated	1	1.96781	0.1398	downregulated	1	0.750077	0.4723	downregulated	5	5.91359	0.0027	downregulated	6	6.30255	0.0018	downregulated	8	6.62998	0.0013	downregulated	5	4.18624	0.0152
amino acid binding	GO	8 out of 8	27.7767	upregulated	2	1.68981	0.1846	upregulated	4	5.65545	0.0035	upregulated	6	5.75405	0.0032	upregulated	1	2.95422	0.0521	downregulated	3	1.85157	0.157	downregulated	4	3.33825	0.0355	downregulated	6	3.37292	0.0343	downregulated	4	3.16044	0.0424
transmission of nerve impulse	GO	5 out of 8	27.6659	upregulated	2	1.82362	0.1614					downregulated	4	2.77569	0.0623	downregulated	3	3.61382	0.0269	downregulated	5	6.09571	0.0023	downregulated	8	7.91842	0.0004	downregulated	8	9.03707	0.0001	downregulated	8	9.18059	0.0001
positive regulation of cation transmembrane transport	GO	5 out of 8	27.2899	upregulated	7	4.34178	0.013	downregulated	1	2.31896	0.0984	downregulated	8	5.87309	0.0028	downregulated	3	2.85642	0.0575	downregulated	9	7.28107	0.0007	downregulated	15	8.96414	0.0001	downregulated	17	8.26282	0.0003	downregulated	14	9.48859	7.6e-05
regulation of release of sequestered calcium ion into cytosol	GO	4 out of 8	27.0792	downregulated	2	1.32588	0.2656	downregulated	1	2.70311	0.067	downregulated	4	1.99785	0.1356	downregulated	2	0.925877	0.3962	downregulated	8	6.16396	0.0021	downregulated	11	10.7439	2.2e-05	downregulated	11	9.18693	0.0001	downregulated	7	7.9371	0.0004
positive regulation of cation channel activity	GO	5 out of 8	26.9665	upregulated	4	5.48135	0.0042					downregulated	2	1.78642	0.1676	downregulated	2	3.55951	0.0285	downregulated	5	5.21978	0.0054	downregulated	8	6.7273	0.0012	downregulated	11	7.38612	0.0006	downregulated	8	7.49783	0.0006
phosphatase binding	GO	5 out of 8	26.8128	downregulated	8	2.36931	0.0935	upregulated	3	1.58081	0.2058	downregulated	16	4.05684	0.0173	downregulated	7	2.30761	0.0995	downregulated	14	11.1939	1.4e-05	downregulated	16	8.77037	0.0002	downregulated	16	9.75665	5.8e-05	downregulated	18	4.24486	0.0143
transcription factor activity, RNA polymerase II core promoter sequence-specific DNA binding	GO	8 out of 8	26.6784	upregulated	4	4.53744	0.0107	upregulated	1	3.46996	0.0311	upregulated	1	1.43399	0.2384	upregulated	1	4.73175	0.0088	downregulated	3	4.62267	0.0098	downregulated	3	3.68012	0.0252	downregulated	3	2.78814	0.0615	downregulated	1	1.41433	0.2431
apical dendrite	GO	6 out of 8	26.661	upregulated	1	1.58316	0.2053					downregulated	1	1.88353	0.1521	upregulated	1	4.31976	0.0133	downregulated	2	2.92507	0.0537	downregulated	3	7.13363	0.0008	downregulated	4	7.03781	0.0009	downregulated	3	5.54507	0.0039
regulation of tube diameter	GO	7 out of 8	26.4641	upregulated	5	2.99683	0.0499	upregulated	5	3.54271	0.0289	upregulated	9	6.17545	0.0021	downregulated	6	3.62581	0.0266	downregulated	7	3.89132	0.0204	downregulated	11	4.63756	0.0097	downregulated	10	4.85613	0.0078	downregulated	6	3.98992	0.0185
regulation of blood vessel diameter	GO	7 out of 8	26.4641	upregulated	5	2.99683	0.0499	upregulated	5	3.54271	0.0289	upregulated	9	6.17545	0.0021	downregulated	6	3.62581	0.0266	downregulated	7	3.89132	0.0204	downregulated	11	4.63756	0.0097	downregulated	10	4.85613	0.0078	downregulated	6	3.98992	0.0185
peptide hormone secretion	GO	7 out of 8	25.8842	upregulated	1	0.366602	0.6931					upregulated	3	2.60406	0.074	upregulated	1	1.41068	0.244	downregulated	3	4.07881	0.0169	downregulated	3	6.80378	0.0011	downregulated	4	5.09173	0.0061	downregulated	3	5.52852	0.004
glycoprotein biosynthetic process	GO	6 out of 8	25.8472	upregulated	13	5.04663	0.0064	upregulated	19	8.14363	0.0003	upregulated	12	7.0121	0.0009	downregulated	13	5.20206	0.0055	downregulated	11	3.0844	0.0458	downregulated	26	4.65325	0.0095	downregulated	23	3.71612	0.0243	downregulated	23	3.10927	0.0446
negative regulation of neuron death	GO	6 out of 8	25.8456	upregulated	13	5.47806	0.0042	upregulated	3	1.74655	0.1744	downregulated	12	4.25632	0.0142	downregulated	7	1.20454	0.2998	downregulated	10	4.85764	0.0078	downregulated	16	8.00324	0.0003	downregulated	14	7.57506	0.0005	downregulated	11	3.64588	0.0261
neuromuscular junction	GO	6 out of 8	25.6883	upregulated	2	3.95803	0.0191	upregulated	2	1.28104	0.2777	downregulated	4	3.05824	0.047	downregulated	3	2.77146	0.0626	downregulated	5	6.08589	0.0023	downregulated	10	8.47337	0.0002	downregulated	9	6.34388	0.0018	downregulated	6	5.37578	0.0046
protein secretion	GO	6 out of 8	25.6689	upregulated	5	2.26242	0.1041	upregulated	2	1.76152	0.1718	upregulated	5	1.84971	0.1573	downregulated	7	3.53052	0.0293	downregulated	6	5.20716	0.0055	downregulated	10	6.78631	0.0011	downregulated	10	6.75895	0.0012	downregulated	9	6.42305	0.0016
retrograde transport, endosome to plasma membrane	GO	7 out of 8	25.5612	upregulated	3	4.46077	0.0116	downregulated	2	3.2497	0.0388	upregulated	1	2.57685	0.076	upregulated	1	1.8279	0.1608	downregulated	3	4.58364	0.0102	downregulated	5	6.04317	0.0024	downregulated	3	3.65957	0.0257	downregulated	1	5.65897	0.0035
mRNA 3'-UTR AU-rich region binding	GO	7 out of 8	25.3507	upregulated	3	5.53121	0.004	upregulated	1	1.80328	0.1648	upregulated	3	4.90724	0.0074	upregulated	1	4.21049	0.0148	upregulated	1	2.00652	0.1345	downregulated	3	3.65546	0.0258	downregulated	2	4.00516	0.0182	downregulated	4	3.24441	0.039
cellular pigmentation	GO	5 out of 8	25.3371	upregulated	4	3.19232	0.0411					upregulated	4	3.40305	0.0333					downregulated	7	9.51606	7.4e-05	downregulated	8	9.28711	9.3e-05	downregulated	3	2.91514	0.0542	upregulated	6	2.97657	0.051
ubiquitin-like protein ligase activity	GO	6 out of 8	25.296	upregulated	18	2.60675	0.0738	upregulated	16	4.76766	0.0085	downregulated	19	2.78729	0.0616	downregulated	12	2.36104	0.0943	downregulated	9	2.45311	0.086	downregulated	25	7.84088	0.0004	downregulated	25	6.75441	0.0012	downregulated	25	6.02155	0.0024
postsynapse assembly	GO	7 out of 8	25.0543	upregulated	2	3.50215	0.0301					upregulated	2	3.37644	0.0342	upregulated	1	3.27342	0.0379	downregulated	2	2.18999	0.1119	downregulated	5	5.24091	0.0053	downregulated	5	4.51117	0.011	downregulated	2	2.96023	0.0518
coenzyme binding	GO	7 out of 8	24.9168	upregulated	10	0.492943	0.6108	upregulated	20	10.2981	3.4e-05	upregulated	12	5.27765	0.0051	upregulated	7	9.42874	8e-05	downregulated	2	0.0219721	0.9783	downregulated	6	0.193468	0.8241	downregulated	9	0.217288	0.8047	upregulated	20	1.01329	0.363
response to anesthetic	GO	6 out of 8	24.8395	upregulated	4	3.9939	0.0184	downregulated	1	2.21102	0.1096	upregulated	4	4.13944	0.0159	downregulated	2	0.510042	0.6005	downregulated	6	3.09196	0.0454	downregulated	12	6.58315	0.0014	downregulated	10	7.07136	0.0008	downregulated	8	2.68079	0.0685
regulation of hormone secretion	GO	8 out of 8	24.5719	upregulated	9	2.12311	0.1197	upregulated	9	1.18763	0.3049	upregulated	14	3.62545	0.0266	upregulated	5	2.91102	0.0544	downregulated	9	2.95007	0.0523	downregulated	22	2.854	0.0576	downregulated	18	4.01168	0.0181	downregulated	16	4.90896	0.0074
regulation of blood vessel size	GO	6 out of 8	24.4853	upregulated	6	4.52182	0.0109	upregulated	6	3.93132	0.0196	upregulated	10	7.57943	0.0005	downregulated	6	3.42797	0.0325	downregulated	7	3.6637	0.0256	downregulated	11	4.31456	0.0134	downregulated	11	4.63964	0.0097	downregulated	6	3.78464	0.0227
regulation of tube size	GO	6 out of 8	24.4803	upregulated	6	4.50891	0.011	upregulated	6	3.91725	0.0199	upregulated	10	7.56478	0.0005	downregulated	6	3.40432	0.0332	downregulated	7	3.6637	0.0256	downregulated	11	4.31456	0.0134	downregulated	11	4.63964	0.0097	downregulated	6	3.78464	0.0227
regulation of sensory perception of pain	GO	7 out of 8	24.3709	upregulated	1	3.45688	0.0315	upregulated	1	3.08749	0.0456	upregulated	2	4.9517	0.0071	downregulated	2	1.73135	0.177	downregulated	2	3.99727	0.0184	downregulated	2	3.44299	0.032	downregulated	1	3.2175	0.0401	downregulated	3	3.94838	0.0193
regulation of cytoplasmic translation	GO	8 out of 8	24.3541	upregulated	2	2.41613	0.0893	upregulated	2	1.30036	0.2724	upregulated	4	5.94498	0.0026	upregulated	1	3.85066	0.0213	downregulated	3	2.5102	0.0813	downregulated	3	3.23643	0.0393	downregulated	2	3.4326	0.0323	downregulated	2	1.66273	0.1896
fear response	GO	5 out of 8	24.2475	downregulated	2	1.41434	0.2431	downregulated	1	1.0759	0.341	upregulated	4	10.5277	2.7e-05					downregulated	4	3.04871	0.0474	downregulated	4	3.81629	0.022	downregulated	6	4.84698	0.0079	downregulated	6	4.49808	0.0111
cardiac conduction	GO	6 out of 8	24.2461	upregulated	3	2.93975	0.0529	downregulated	2	3.21291	0.0402	upregulated	3	1.35653	0.2576	downregulated	1	1.14704	0.3176	downregulated	5	5.67711	0.0034	downregulated	7	5.99947	0.0025	downregulated	9	6.65845	0.0013	downregulated	10	5.97478	0.0025
protein-DNA complex assembly	GO	6 out of 8	24.1403	upregulated	18	7.79699	0.0004	upregulated	17	10.9371	1.8e-05	downregulated	11	0.997247	0.3689	upregulated	3	2.94951	0.0524	downregulated	4	2.83414	0.0588	downregulated	7	1.20816	0.2987	downregulated	6	1.13128	0.3226	upregulated	15	1.71968	0.1791
positive regulation of sodium ion transmembrane transporter activity	GO	6 out of 8	23.9612	upregulated	1	1.19539	0.3026					upregulated	1	2.56391	0.077	downregulated	1	1.01348	0.363	downregulated	2	3.7628	0.0232	downregulated	3	4.36696	0.0127	downregulated	3	5.66241	0.0035	downregulated	4	7.42319	0.0006
integral component of postsynaptic membrane	GO	6 out of 8	23.9351	upregulated	1	1.62853	0.1962					upregulated	1	3.61362	0.027					downregulated	1	3.70511	0.0246	downregulated	3	5.23131	0.0053	downregulated	4	5.26523	0.0052	downregulated	2	4.4913	0.0112
GTPase regulator activity	GO	5 out of 8	23.8163	upregulated	17	3.53143	0.0293	downregulated	5	0.394528	0.674	downregulated	33	6.40143	0.0017	downregulated	22	8.82888	0.0001	downregulated	25	11.2171	1.3e-05	downregulated	36	9.9351	4.8e-05	downregulated	32	8.63765	0.0002	downregulated	33	6.11983	0.0022
establishment of organelle localization	GO	5 out of 8	23.6752	upregulated	22	4.98726	0.0068	downregulated	5	1.75632	0.1727	downregulated	31	8.58247	0.0002	downregulated	20	4.91294	0.0074	downregulated	21	5.1535	0.0058	downregulated	47	13.5155	1.3e-06	downregulated	32	7.52504	0.0005	downregulated	33	7.74558	0.0004
negative regulation of dendrite development	GO	5 out of 8	23.606	downregulated	1	1.15534	0.315	upregulated	1	3.08419	0.0458	downregulated	1	1.07748	0.3405	downregulated	3	3.37311	0.0343	downregulated	3	5.67543	0.0034	downregulated	4	6.65627	0.0013	downregulated	5	7.3492	0.0006	downregulated	3	6.44685	0.0016
regulation of GTP binding	GO	7 out of 8	23.5049	upregulated	4	5.06529	0.0063	upregulated	1	3.51381	0.0298	upregulated	1	1.04582	0.3514					downregulated	2	4.17202	0.0154	downregulated	2	4.52755	0.0108	downregulated	1	1.62974	0.196	downregulated	2	3.55071	0.0287
peptide secretion	GO	4 out of 8	23.1502	upregulated	5	2.16274	0.115	upregulated	2	1.65632	0.1908	upregulated	6	2.19479	0.1114	downregulated	7	3.05521	0.0471	downregulated	6	4.65494	0.0095	downregulated	10	6.29154	0.0019	downregulated	11	6.18848	0.0021	downregulated	9	6.0152	0.0024
startle response	GO	4 out of 8	22.926	upregulated	1	2.02734	0.1317					upregulated	3	4.00904	0.0182	upregulated	1	2.87072	0.0567	downregulated	4	5.94632	0.0026	downregulated	6	7.83286	0.0004	downregulated	4	5.02096	0.0066	downregulated	4	4.12586	0.0161
regulation of calcium ion transmembrane transport via high voltage-gated calcium channel	GO	6 out of 8	22.9072	upregulated	2	4.14642	0.0158	upregulated	1	1.73973	0.1756	upregulated	2	2.95168	0.0523					downregulated	2	3.27327	0.0379	downregulated	2	5.246	0.0053	downregulated	2	5.55011	0.0039	upregulated	1	2.45645	0.0857
membrane docking	GO	6 out of 8	22.8902	upregulated	16	8.01399	0.0003	upregulated	12	7.36402	0.0006	downregulated	15	1.85476	0.1565	downregulated	7	1.27827	0.2785	downregulated	7	1.68061	0.1863	downregulated	12	2.65502	0.0703	downregulated	12	2.6165	0.0731	downregulated	13	3.69306	0.0249
acetylcholine receptor activity	GO	4 out of 8	22.8062																	downregulated	2	4.46639	0.0115	downregulated	2	5.7056	0.0033	downregulated	3	4.68096	0.0093	downregulated	3	7.95325	0.0004
social behavior	GO	7 out of 8	22.795	upregulated	4	3.21838	0.04					upregulated	5	4.394	0.0124	upregulated	2	3.54682	0.0288	downregulated	5	2.95573	0.052	downregulated	6	4.45922	0.0116	downregulated	6	2.54101	0.0788	downregulated	4	1.67986	0.1864
negative regulation of cation channel activity	GO	8 out of 8	22.6952	upregulated	4	4.19587	0.0151	upregulated	1	2.48404	0.0834	upregulated	2	1.29943	0.2727	upregulated	1	1.66745	0.1887	downregulated	3	4.03108	0.0178	downregulated	5	3.68179	0.0252	downregulated	6	3.36131	0.0347	downregulated	3	1.97421	0.1389
regulation of ERAD pathway	GO	6 out of 8	22.6876	upregulated	5	4.8722	0.0077	upregulated	3	3.50628	0.03	downregulated	1	0.106642	0.8988	downregulated	1	0.543669	0.5806	downregulated	3	3.86785	0.0209	downregulated	6	5.00773	0.0067	downregulated	3	3.88137	0.0206	downregulated	2	2.20245	0.1105
chloride transmembrane transport	GO	6 out of 8	22.6813	upregulated	6	5.71007	0.0033	upregulated	3	1.19729	0.302	downregulated	7	4.72812	0.0088	downregulated	6	4.81231	0.0081	downregulated	4	6.7103	0.0012	downregulated	8	7.46901	0.0006	downregulated	9	8.02236	0.0003	downregulated	5	3.11271	0.0445
protein localization to membrane	GO	6 out of 8	22.5302	upregulated	28	5.12112	0.006	upregulated	14	2.22671	0.1079	downregulated	29	2.74162	0.0645	downregulated	18	3.91747	0.0199	downregulated	22	5.17449	0.0057	downregulated	47	6.82449	0.0011	downregulated	40	4.47788	0.0114	downregulated	32	5.36458	0.0047
regulation of sequestering of calcium ion	GO	5 out of 8	22.3262	upregulated	5	1.93546	0.1444	downregulated	2	2.96665	0.0515	downregulated	8	4.31139	0.0134	downregulated	4	1.46449	0.2312	downregulated	9	4.80879	0.0082	downregulated	15	8.64362	0.0002	downregulated	14	8.03467	0.0003	downregulated	11	7.6462	0.0005
circadian behavior	GO	7 out of 8	22.12	upregulated	2	3.95866	0.0191					upregulated	2	3.26789	0.0381	upregulated	2	6.02297	0.0024	downregulated	1	2.44963	0.0863	downregulated	3	2.96372	0.0516	downregulated	3	2.95141	0.0523	downregulated	1	0.505699	0.6031
calcium ion transmembrane import into cytosol	GO	5 out of 8	22.1064	upregulated	3	2.53554	0.0792	downregulated	1	2.92749	0.0535	downregulated	4	2.6649	0.0696	downregulated	3	1.95362	0.1418	downregulated	6	6.72144	0.0012	downregulated	11	9.42421	8.1e-05	downregulated	9	6.01383	0.0024	downregulated	8	4.95738	0.007
negative regulation of potassium ion transmembrane transporter activity	GO	8 out of 8	21.9975	upregulated	1	0.983674	0.3739	upregulated	1	3.14583	0.043	upregulated	1	1.39483	0.2479	upregulated	1	3.29365	0.0371	downregulated	2	3.50993	0.0299	downregulated	2	2.84062	0.0584	downregulated	3	2.61678	0.073	downregulated	3	4.2122	0.0148
ubiquitin-protein transferase activity	GO	3 out of 8	21.8934	upregulated	46	18.4631	9.6e-09	upregulated	29	7.77947	0.0004	downregulated	27	1.6517	0.1917	downregulated	16	1.03021	0.3569	downregulated	19	5.17632	0.0056	downregulated	47	14.4885	5.1e-07	upregulated	53	6.85679	0.0011	downregulated	45	9.08536	0.0001
rhythmic behavior	GO	7 out of 8	21.8691	upregulated	2	3.92284	0.0198					upregulated	2	3.23325	0.0394	upregulated	2	5.9854	0.0025	downregulated	1	2.43108	0.0879	downregulated	3	2.89864	0.0551	downregulated	3	2.90389	0.0548	downregulated	1	0.493945	0.6102
visual behavior	GO	6 out of 8	21.8287	upregulated	2	1.61449	0.199	downregulated	2	1.5878	0.2044	upregulated	3	7.18226	0.0008					downregulated	4	4.30054	0.0136	downregulated	6	4.34035	0.013	downregulated	8	2.79582	0.0611	downregulated	7	3.18302	0.0415
positive regulation of long-term synaptic potentiation	GO	5 out of 8	21.7535					downregulated	1	1.29153	0.2749	upregulated	1	2.70822	0.0667					downregulated	3	4.64919	0.0096	downregulated	5	6.71977	0.0012	downregulated	3	3.9208	0.0198	downregulated	4	5.04708	0.0064
regulation of heart contraction	GO	6 out of 8	21.7458	downregulated	3	1.68786	0.1849	upregulated	6	4.08454	0.0168	downregulated	13	1.26253	0.2829	upregulated	3	1.33202	0.2639	downregulated	12	4.51723	0.0109	downregulated	15	5.0829	0.0062	downregulated	18	6.25298	0.0019	downregulated	16	3.42651	0.0325
phospholipid binding	GO	4 out of 8	21.34	downregulated	11	2.53751	0.0791	upregulated	7	0.944358	0.3889	downregulated	41	15.4656	1.9e-07	downregulated	25	8.02771	0.0003	downregulated	20	4.4716	0.0114	downregulated	38	5.9124	0.0027	downregulated	36	6.82863	0.0011	downregulated	33	4.1274	0.0161
proton transmembrane transport	GO	8 out of 8	21.2403	upregulated	6	2.0059	0.1345	upregulated	4	1.36635	0.255	upregulated	5	2.22488	0.1081	upregulated	2	1.63735	0.1945	downregulated	6	2.79043	0.0614	downregulated	10	4.12028	0.0162	downregulated	7	3.784	0.0227	downregulated	6	3.31114	0.0365
inorganic cation import across plasma membrane	GO	7 out of 8	21.2326	upregulated	3	2.49402	0.0826					upregulated	2	0.853365	0.426	upregulated	2	4.55557	0.0105	downregulated	4	3.70969	0.0245	downregulated	6	5.10053	0.0061	downregulated	4	2.89072	0.0555	downregulated	4	1.62873	0.1962
protein kinase inhibitor activity	GO	4 out of 8	21.2204	upregulated	5	2.54669	0.0783	downregulated	1	1.38946	0.2492	downregulated	2	1.34189	0.2614	downregulated	1	1.34189	0.2614	downregulated	6	7.82187	0.0004	downregulated	7	6.35743	0.0017	downregulated	9	3.89555	0.0203	downregulated	6	3.14558	0.043
sleep	GO	6 out of 8	21.0763	upregulated	1	3.98922	0.0185					upregulated	3	6.27902	0.0019					downregulated	1	3.30574	0.0367	downregulated	3	3.91322	0.02	downregulated	1	1.14804	0.3173	downregulated	2	2.44106	0.0871
transferase activity, transferring sulfur-containing groups	GO	6 out of 8	21.0609	upregulated	2	1.82315	0.1615					upregulated	3	4.96863	0.007	downregulated	2	2.45629	0.0858	downregulated	5	5.38437	0.0046	downregulated	6	4.1592	0.0156	downregulated	4	3.68745	0.025	downregulated	4	3.49441	0.0304
translation repressor activity, mRNA regulatory element binding	GO	4 out of 8	21.001					upregulated	1	6.13896	0.0022	upregulated	4	5.79939	0.003	upregulated	1	4.13103	0.0161	downregulated	2	1.7597	0.1721	downregulated	3	5.82455	0.003	downregulated	3	6.18766	0.0021	downregulated	4	7.2291	0.0007
cell-cell signaling involved in cardiac conduction	GO	6 out of 8	20.8255	upregulated	2	2.94574	0.0526	downregulated	2	4.1904	0.0151	upregulated	2	1.85187	0.1569	downregulated	1	1.95199	0.142	downregulated	2	6.56442	0.0014	downregulated	3	5.87196	0.0028	downregulated	5	4.77612	0.0084	downregulated	4	4.95775	0.007
mannosylation	GO	6 out of 8	20.7116	upregulated	2	1.64356	0.1933	upregulated	2	2.38476	0.0921	upregulated	3	8.3758	0.0002					upregulated	1	1.07246	0.3422	downregulated	4	3.22385	0.0398	downregulated	4	2.38828	0.0918	downregulated	3	3.76778	0.0231
cellular response to forskolin	GO	6 out of 8	20.3608									upregulated	1	3.53374	0.0292	upregulated	1	2.24979	0.1054	downregulated	2	4.12555	0.0162	downregulated	3	4.0427	0.0176	downregulated	3	2.96813	0.0514	downregulated	4	3.44087	0.032
response to alkaloid	GO	6 out of 8	20.295	upregulated	5	3.07425	0.0462	downregulated	1	2.43774	0.0874	upregulated	4	2.91511	0.0542	downregulated	2	0.231184	0.7936	downregulated	7	2.47145	0.0845	downregulated	13	6.29046	0.0019	downregulated	12	5.9896	0.0025	downregulated	9	2.22305	0.1083
learned vocalization behavior or vocal learning	GO	5 out of 8	20.0215	upregulated	1	2.94037	0.0528					downregulated	1	0.572528	0.5641					downregulated	2	4.53372	0.0107	downregulated	3	5.90883	0.0027	downregulated	2	2.09788	0.1227	downregulated	3	5.11319	0.006
positive regulation of calcium ion transmembrane transporter activity	GO	5 out of 8	20.0213	upregulated	5	8.38666	0.0002	downregulated	1	3.55172	0.0287	downregulated	2	2.35086	0.0953	downregulated	1	0.69787	0.4976	downregulated	3	4.11751	0.0163	downregulated	4	5.33991	0.0048	downregulated	5	5.52456	0.004	downregulated	2	3.2531	0.0387
vitamin binding	GO	6 out of 8	19.9796	upregulated	5	4.32797	0.0132	upregulated	8	6.68239	0.0013	upregulated	8	5.23432	0.0053	upregulated	3	2.97664	0.051									downregulated	4	0.116942	0.8896	downregulated	6	0.641288	0.5266
cell communication involved in cardiac conduction	GO	6 out of 8	19.9293	upregulated	2	2.13202	0.1186	downregulated	2	3.72928	0.024	upregulated	3	2.24959	0.1054	downregulated	1	1.52129	0.2184	downregulated	3	6.1432	0.0021	downregulated	4	5.45112	0.0043	downregulated	7	4.66596	0.0094	downregulated	6	4.53802	0.0107
positive regulation of glutamate receptor signaling pathway	GO	4 out of 8	19.7637																	downregulated	2	3.54418	0.0289	downregulated	3	4.07633	0.017	downregulated	5	6.09467	0.0023	downregulated	3	6.04857	0.0024
regulation of dendritic spine maintenance	GO	6 out of 8	19.6046					downregulated	1	1.94951	0.1423	upregulated	1	2.79778	0.0609	upregulated	1	2.91344	0.0543	downregulated	2	2.5893	0.0751	downregulated	3	5.6846	0.0034	downregulated	2	4.48411	0.0113	downregulated	2	3.08486	0.0457
muscle cell differentiation	GO	7 out of 8	19.5234	upregulated	13	5.45937	0.0043	upregulated	7	2.13058	0.1188	downregulated	18	3.07477	0.0462	upregulated	5	4.27192	0.014	downregulated	10	2.05819	0.1277	downregulated	12	2.74584	0.0642	downregulated	12	3.28504	0.0374	downregulated	16	2.64719	0.0709
cullin-RING ubiquitin ligase complex	GO	4 out of 8	19.4911	upregulated	19	10.8299	2e-05	upregulated	8	2.55874	0.0774	downregulated	9	0.744264	0.4751	downregulated	3	0.362861	0.6957	downregulated	5	6.31835	0.0018	upregulated	17	3.91644	0.0199	upregulated	15	3.58877	0.0276	downregulated	10	4.80765	0.0082
regulation of mRNA polyadenylation	GO	8 out of 8	19.4791	upregulated	1	1.24238	0.2887	upregulated	1	0.977616	0.3762	upregulated	3	5.9379	0.0026	upregulated	1	4.34315	0.013	downregulated	1	0.761673	0.4669	downregulated	1	2.17837	0.1132	downregulated	1	2.06004	0.1274	downregulated	1	1.97792	0.1384
kinase inhibitor activity	GO	5 out of 8	19.4727	upregulated	5	2.31779	0.0985	downregulated	1	1.33482	0.2632	downregulated	2	1.28774	0.2759	downregulated	1	1.28774	0.2759	downregulated	6	7.40919	0.0006	downregulated	7	5.92715	0.0027	downregulated	9	3.5985	0.0274	downregulated	6	2.8426	0.0583
sodium ion import across plasma membrane	GO	6 out of 8	19.4366									upregulated	1	1.73694	0.1761	upregulated	1	2.70527	0.0669	downregulated	2	3.25836	0.0385	downregulated	2	3.32875	0.0358	downregulated	2	4.40227	0.0122	downregulated	3	4.00506	0.0182
negative regulation of potassium ion transmembrane transport	GO	8 out of 8	19.3071	upregulated	1	0.813871	0.4431	upregulated	1	2.92803	0.0535	upregulated	1	1.2053	0.2996	upregulated	1	3.0751	0.0462	downregulated	2	3.07965	0.046	downregulated	2	2.45278	0.0861	downregulated	3	2.12888	0.119	downregulated	3	3.62346	0.0267
feeding behavior	GO	8 out of 8	19.2196	upregulated	6	5.80826	0.003	upregulated	2	0.884521	0.4129	upregulated	3	1.86163	0.1554	upregulated	1	0.73398	0.48	downregulated	4	3.72855	0.024	downregulated	8	3.52593	0.0294	downregulated	7	1.9359	0.1443	downregulated	4	0.740784	0.4767
axon cytoplasm	GO	7 out of 8	19.1942	upregulated	5	2.99264	0.0502	downregulated	2	1.2638	0.2826	upregulated	2	1.54104	0.2142	upregulated	1	1.46225	0.2317	downregulated	3	2.13342	0.1184	downregulated	6	4.37735	0.0126	downregulated	5	3.67415	0.0254	downregulated	5	4.27713	0.0139
water homeostasis	GO	8 out of 8	19.1624	upregulated	2	0.569015	0.5661	upregulated	1	3.37537	0.0342	upregulated	1	3.53978	0.029	upregulated	1	0.943037	0.3894	downregulated	4	3.33395	0.0357	downregulated	4	2.74911	0.064	downregulated	3	2.6259	0.0724	downregulated	4	2.02619	0.1318
PDZ domain binding	GO	6 out of 8	19.1281	upregulated	9	6.13813	0.0022	upregulated	2	2.42512	0.0885	upregulated	7	3.64808	0.026	upregulated	2	1.97262	0.1391	downregulated	7	3.82051	0.0219	upregulated	9	2.36107	0.0943	upregulated	8	4.22821	0.0146	downregulated	7	3.48475	0.0307
translation factor activity, RNA binding	GO	8 out of 8	18.9701	upregulated	3	0.153678	0.8575	upregulated	3	1.935	0.1444	upregulated	6	2.93399	0.0532	upregulated	1	2.69139	0.0678	downregulated	7	4.93607	0.0072	downregulated	9	2.75052	0.0639	downregulated	7	0.818635	0.441	downregulated	6	2.75078	0.0639
response to temperature stimulus	GO	7 out of 8	18.8266	upregulated	10	3.25624	0.0385	upregulated	5	1.3548	0.258	upregulated	4	0.505447	0.6032	downregulated	5	0.752921	0.471	downregulated	9	3.1629	0.0423	downregulated	16	4.04123	0.0176	downregulated	12	4.15964	0.0156	downregulated	8	3.09928	0.0451
mating behavior	GO	7 out of 8	18.8133					upregulated	1	1.19458	0.3028	upregulated	3	5.17733	0.0056	upregulated	2	5.52369	0.004	downregulated	2	1.99552	0.1359	downregulated	2	2.4647	0.085	downregulated	2	1.78569	0.1677	downregulated	1	0.671821	0.5108
hormone secretion	GO	6 out of 8	18.6228	downregulated	2	1.15756	0.3143	upregulated	1	0.161799	0.8506	upregulated	3	2.3305	0.0972	downregulated	2	1.67073	0.1881	downregulated	3	3.30041	0.0369	downregulated	3	6.20658	0.002	downregulated	4	4.51024	0.011	downregulated	3	4.94161	0.0071
negative regulation of voltage-gated calcium channel activity	GO	7 out of 8	18.5518	upregulated	1	2.12611	0.1193					upregulated	1	1.40502	0.2454	upregulated	1	2.88958	0.0556	downregulated	1	3.22176	0.0399	downregulated	2	3.65252	0.0259	downregulated	3	4.00156	0.0183	downregulated	1	1.25524	0.285
pigmentation	GO	6 out of 8	18.5278	upregulated	6	5.51577	0.004	upregulated	2	1.86349	0.1551	upregulated	5	2.34505	0.0958	upregulated	1	0.858337	0.4239	downregulated	7	4.87751	0.0076	downregulated	8	4.69496	0.0091	downregulated	3	1.61081	0.1997	upregulated	9	1.62728	0.1965
forebrain development	GO	7 out of 8	18.4876	upregulated	15	1.05395	0.3486	upregulated	10	3.83786	0.0215	downregulated	26	8.46669	0.0002	upregulated	8	3.00721	0.0494	downregulated	17	5.52874	0.004	downregulated	26	5.6592	0.0035	downregulated	31	4.10324	0.0165	downregulated	25	3.76411	0.0232
cytoskeletal adaptor activity	GO	7 out of 8	18.4336					upregulated	2	2.95168	0.0523	upregulated	2	2.97218	0.0512	upregulated	1	4.14385	0.0159	downregulated	2	2.27503	0.1028	downregulated	2	2.3568	0.0947	downregulated	2	2.11545	0.1206	downregulated	1	1.61862	0.1982
ribosome binding	GO	7 out of 8	18.4057	upregulated	1	0.0872456	0.9165	upregulated	3	2.36272	0.0942	upregulated	7	9.74077	5.9e-05	upregulated	2	3.34655	0.0352	downregulated	3	1.50766	0.2214	downregulated	3	1.31492	0.2685	downregulated	3	1.20854	0.2986	upregulated	5	1.16271	0.3126
response to cold	GO	5 out of 8	18.3662	upregulated	1	2.45325	0.086					downregulated	3	1.21763	0.2959					downregulated	4	4.55033	0.0106	downregulated	5	4.85357	0.0078	downregulated	4	4.86537	0.0077	downregulated	4	2.86127	0.0572
positive regulation of calcium ion transmembrane transport	GO	5 out of 8	18.1863	upregulated	6	7.53483	0.0005	downregulated	1	2.93401	0.0532	downregulated	4	4.25308	0.0142	downregulated	1	0.414743	0.6605	downregulated	5	5.09643	0.0061	downregulated	6	5.64707	0.0035	downregulated	6	4.45449	0.0116	downregulated	3	3.05533	0.0471
spanning component of membrane	GO	6 out of 8	18.1724	upregulated	1	1.31652	0.2681	downregulated	1	1.794	0.1663	upregulated	2	4.29771	0.0136					downregulated	1	1.73896	0.1757	downregulated	3	4.94124	0.0071	downregulated	4	6.02311	0.0024	downregulated	1	1.64883	0.1923
negative regulation of ERAD pathway	GO	6 out of 8	18.0472	upregulated	3	4.23777	0.0144	upregulated	1	1.65514	0.1911									downregulated	2	3.43993	0.0321	downregulated	3	4.28501	0.0138	downregulated	1	2.58662	0.0753	downregulated	1	1.84273	0.1584
negative regulation of response to oxidative stress	GO	6 out of 8	17.9604	upregulated	4	2.35047	0.0953	upregulated	2	3.51514	0.0297	downregulated	4	3.13387	0.0435	downregulated	2	1.75723	0.1725	downregulated	3	3.58076	0.0279	downregulated	5	6.13284	0.0022	downregulated	6	5.03638	0.0065	downregulated	2	2.23593	0.1069
ATP synthesis coupled electron transport	GO	7 out of 8	17.9343	upregulated	4	1.35502	0.2579	upregulated	3	1.4678	0.2304	upregulated	2	0.813859	0.4431					downregulated	6	4.36443	0.0127	downregulated	11	6.50373	0.0015	downregulated	7	1.42694	0.24	downregulated	3	2.00254	0.135
axolemma	GO	6 out of 8	17.9094	upregulated	1	2.5685	0.0767	downregulated	1	0.998093	0.3686	upregulated	1	7.6045	0.0005	upregulated	1	4.00194	0.0183	upregulated	1	2.6254	0.0724	downregulated	2	3.2475	0.0389	downregulated	3	2.3012	0.1001	downregulated	2	1.80926	0.1638
regulation of response to oxidative stress	GO	5 out of 8	17.8501	downregulated	5	2.59392	0.0747	upregulated	4	6.4114	0.0016	downregulated	5	2.40057	0.0907	downregulated	2	1.14241	0.319	downregulated	5	4.4413	0.0118	downregulated	9	5.40424	0.0045	downregulated	8	4.62561	0.0098	downregulated	7	3.10441	0.0449
mRNA splice site selection	GO	4 out of 8	17.6516	downregulated	2	1.79124	0.1668	downregulated	1	3.66358	0.0256	downregulated	6	2.23636	0.1068					downregulated	3	2.69492	0.0675	downregulated	5	4.43861	0.0118	downregulated	3	4.46401	0.0115	downregulated	5	6.05405	0.0023
exploration behavior	GO	6 out of 8	17.5494	upregulated	1	2.32704	0.0976	upregulated	1	0.607549	0.5447									downregulated	3	3.33335	0.0357	downregulated	5	3.62026	0.0268	downregulated	6	3.60628	0.0272	downregulated	4	4.05488	0.0173
inner ear receptor cell development	GO	5 out of 8	17.3455	upregulated	2	0.78078	0.458	downregulated	1	1.31092	0.2696	downregulated	4	1.37577	0.2526					downregulated	3	4.79492	0.0083	downregulated	4	6.3375	0.0018	downregulated	5	5.73698	0.0032	downregulated	1	2.38199	0.0924
mating	GO	8 out of 8	17.2643	upregulated	1	1.04327	0.3523	upregulated	1	0.801582	0.4486	upregulated	4	5.59543	0.0037	upregulated	2	4.7108	0.009	downregulated	2	1.60716	0.2005	downregulated	3	1.69199	0.1842	downregulated	2	1.40658	0.245	downregulated	1	0.40747	0.6653
organelle fusion	GO	7 out of 8	17.2355	upregulated	8	2.27899	0.1024	upregulated	8	5.45541	0.0043	upregulated	1	0.63616	0.5293	downregulated	5	1.39801	0.2471	downregulated	4	1.36708	0.2548	downregulated	7	3.99719	0.0184	downregulated	7	3.06237	0.0468	downregulated	8	1.83627	0.1594
homophilic cell adhesion via plasma membrane adhesion molecules	GO	6 out of 8	17.2288	upregulated	8	4.46115	0.0115	downregulated	3	1.50298	0.2225	upregulated	5	3.08682	0.0456	downregulated	3	2.621	0.0727	downregulated	8	2.71365	0.0663	downregulated	15	5.20108	0.0055	downregulated	16	5.26164	0.0052	downregulated	8	0.628398	0.5334
negative regulation of long-term synaptic potentiation	GO	5 out of 8	17.1708	upregulated	1	0.841194	0.4312	upregulated	2	4.41087	0.0121	downregulated	1	0.825688	0.4379					downregulated	2	5.48627	0.0041	downregulated	2	5.55786	0.0039	downregulated	1	1.70026	0.1826
pigment biosynthetic process	GO	7 out of 8	17.1007	upregulated	3	1.24954	0.2866	upregulated	6	6.74318	0.0012	upregulated	6	5.90334	0.0027	upregulated	2	3.34255	0.0353	downregulated	1	0.9018	0.4058	downregulated	1	1.19768	0.3019	downregulated	2	1.10109	0.3325	upregulated	7	3.3385	0.0355
neurotransmitter binding	GO	7 out of 8	16.9361	upregulated	2	2.86204	0.0572	upregulated	2	2.20014	0.1108	upregulated	2	1.13844	0.3203	upregulated	1	1.56112	0.2099	downregulated	2	2.17981	0.1131	downregulated	5	3.56277	0.0284	downregulated	5	3.66225	0.0257	downregulated	3	2.63154	0.072
lyase activity	GO	5 out of 8	16.9149	upregulated	9	4.99695	0.0068	upregulated	8	2.73935	0.0646	upregulated	9	5.39768	0.0045	upregulated	4	4.9939	0.0068	upregulated	2	2.49062	0.0829	upregulated	5	2.13518	0.1182	downregulated	9	2.07145	0.126	upregulated	9	3.28441	0.0375
positive regulation of voltage-gated potassium channel activity	GO	4 out of 8	16.9046																	downregulated	1	4.19247	0.0151	downregulated	2	3.69814	0.0248	downregulated	3	3.63	0.0265	downregulated	4	5.38402	0.0046
protein-containing complex scaffold activity	GO	7 out of 8	16.8811	upregulated	8	3.61155	0.027	upregulated	5	3.77093	0.023	downregulated	10	7.54092	0.0005	upregulated	1	1.49467	0.2243	downregulated	7	4.29033	0.0137	downregulated	11	4.43289	0.0119	downregulated	9	3.35429	0.0349	downregulated	5	3.46733	0.0312
dendrite development	GO	5 out of 8	16.7719	downregulated	6	4.04575	0.0175	downregulated	4	2.81122	0.0601	upregulated	8	3.62132	0.0267	upregulated	2	2.18307	0.1127	downregulated	8	6.46972	0.0015	downregulated	13	6.57859	0.0014	downregulated	13	6.83268	0.0011	upregulated	11	2.05655	0.1279
regulation of retrograde protein transport, ER to cytosol	GO	6 out of 8	16.7148	upregulated	2	3.28854	0.0373	upregulated	1	1.65514	0.1911	downregulated	1	0.484802	0.6158	downregulated	1	1.18975	0.3043	downregulated	1	2.05371	0.1283	downregulated	3	4.31844	0.0133	downregulated	2	3.45988	0.0314	downregulated	2	3.61361	0.027
negative regulation of cell growth	GO	6 out of 8	16.6701	upregulated	9	1.12654	0.3242	downregulated	4	4.32186	0.0133	downregulated	18	8.32571	0.0002	upregulated	4	2.62848	0.0722	downregulated	9	4.31744	0.0133	downregulated	12	8.26491	0.0003	downregulated	12	6.22787	0.002	downregulated	14	6.75241	0.0012
cellular response to leucine starvation	GO	6 out of 8	16.6267					upregulated	2	6.00025	0.0025	upregulated	1	2.49528	0.0825					downregulated	1	2.51801	0.0806	downregulated	1	1.96117	0.1407	downregulated	1	1.7346	0.1765	downregulated	2	1.91739	0.147
negative regulation of blood pressure	GO	6 out of 8	16.5547					upregulated	3	1.77029	0.1703	upregulated	3	2.41051	0.0898	downregulated	4	2.48401	0.0834	downregulated	4	3.58593	0.0277	downregulated	4	4.69432	0.0091	downregulated	3	3.5455	0.0289	downregulated	2	3.03217	0.0482
adenylate cyclase activity	GO	4 out of 8	16.5163													upregulated	1	2.59428	0.0747	downregulated	2	4.90983	0.0074	downregulated	2	4.46354	0.0115	downregulated	2	3.71566	0.0243	downregulated	2	3.42729	0.0325
contractile fiber	GO	5 out of 8	16.3966	downregulated	3	2.53081	0.0796	downregulated	5	2.04193	0.1298	downregulated	16	3.12825	0.0438	upregulated	3	2.75932	0.0633	downregulated	11	2.65961	0.07	downregulated	18	6.25017	0.0019	downregulated	15	6.28698	0.0019	downregulated	20	6.14148	0.0022
divalent inorganic cation homeostasis	GO	6 out of 8	16.2945	upregulated	13	7.32632	0.0007	upregulated	12	5.96567	0.0026	downregulated	25	6.16494	0.0021	downregulated	12	1.49884	0.2234	downregulated	17	2.94401	0.0527	downregulated	30	4.0129	0.0181	downregulated	25	2.42937	0.0881	downregulated	20	1.27999	0.278
reproductive behavior	GO	6 out of 8	16.2316					upregulated	1	0.89811	0.4073	upregulated	3	3.86923	0.0209	upregulated	2	4.58858	0.0102	downregulated	3	2.09893	0.1226	downregulated	3	2.67941	0.0686	downregulated	4	2.0973	0.1228	downregulated	2	0.989568	0.3717
cofactor binding	GO	6 out of 8	16.2299	downregulated	10	1.21295	0.2973	upregulated	25	7.89361	0.0004	upregulated	17	4.46405	0.0115	upregulated	8	6.47206	0.0015	downregulated	7	1.8249	0.1612	downregulated	13	1.1075	0.3304	downregulated	18	1.11469	0.328	downregulated	16	1.03806	0.3541
cytokine production involved in immune response	GO	4 out of 8	16.1089	upregulated	1	1.23942	0.2896	upregulated	1	0.524095	0.5921	upregulated	1	2.44287	0.0869	upregulated	1	3.44634	0.0319	downregulated	2	4.53509	0.0107	downregulated	2	4.2684	0.014	downregulated	2	4.70135	0.0091	downregulated	2	2.60409	0.074
regulation of G-protein coupled receptor protein signaling pathway	GO	5 out of 8	15.7717	downregulated	3	2.82665	0.0592	upregulated	3	2.91337	0.0543	downregulated	8	3.50704	0.03	downregulated	8	4.81278	0.0081	downregulated	11	5.78994	0.0031	downregulated	15	8.65112	0.0002	downregulated	15	5.68967	0.0034	downregulated	10	3.87402	0.0208
HOPS complex	GO	6 out of 8	15.7095	upregulated	1	2.66456	0.0696					downregulated	1	0.503328	0.6045	upregulated	1	2.46101	0.0853	downregulated	1	2.61512	0.0732	downregulated	1	2.91402	0.0543	downregulated	1	2.63234	0.0719	downregulated	2	2.92582	0.0536
methylation	GO	4 out of 8	15.6794	upregulated	22	3.72058	0.0242	upregulated	24	10.5653	2.6e-05	upregulated	7	2.50254	0.0819	upregulated	3	6.0163	0.0024	upregulated	4	1.70524	0.1817	upregulated	17	0.347998	0.7061	upregulated	31	2.77863	0.0621	upregulated	25	2.29347	0.1009
spliceosomal snRNP complex	GO	6 out of 8	15.5342	upregulated	2	2.14862	0.1166	upregulated	7	8.73728	0.0002	upregulated	2	2.82392	0.0594	downregulated	1	0.173156	0.841	downregulated	2	1.15911	0.3138	downregulated	3	1.36769	0.2547	downregulated	2	1.26483	0.2823	upregulated	8	1.79412	0.1663
calcium-dependent cell-cell adhesion via plasma membrane cell adhesion molecules	GO	6 out of 8	15.4165	upregulated	4	4.13147	0.0161	upregulated	1	2.05927	0.1275	upregulated	2	4.30188	0.0135					downregulated	2	1.57541	0.2069	downregulated	4	1.39966	0.2467	downregulated	4	1.94884	0.1424
regulation of actin polymerization or depolymerization	GO	6 out of 8	15.3933	upregulated	10	1.17062	0.3102	upregulated	8	2.37168	0.0933	downregulated	14	2.4148	0.0894	downregulated	8	5.46958	0.0042	downregulated	11	5.12563	0.0059	downregulated	19	8.46321	0.0002	downregulated	13	4.56751	0.0104	downregulated	11	1.57902	0.2062
COP9 signalosome	GO	6 out of 8	15.3433	upregulated	3	2.71138	0.0664					upregulated	3	5.99014	0.0025	downregulated	1	1.00235	0.367	downregulated	1	2.53125	0.0796	downregulated	1	1.50059	0.223	downregulated	2	0.889845	0.4107	downregulated	2	2.72243	0.0657
dendrite morphogenesis	GO	6 out of 8	15.1801	downregulated	4	5.1353	0.0059	downregulated	3	3.29602	0.037	upregulated	4	1.93787	0.144	upregulated	2	3.03526	0.0481	downregulated	6	4.00198	0.0183	downregulated	9	6.11023	0.0022	downregulated	8	5.92581	0.0027	downregulated	5	2.60022	0.0743
mRNA binding	GO	4 out of 8	15.1343	upregulated	14	2.17261	0.1139	upregulated	13	3.95975	0.0191	downregulated	26	4.98619	0.0068	downregulated	11	1.848	0.1576	downregulated	9	1.2284	0.2928	downregulated	14	4.27344	0.0139	downregulated	16	4.99526	0.0068	downregulated	21	4.6372	0.0097
lamellipodium organization	GO	6 out of 8	15.0665	upregulated	2	2.59445	0.0747	upregulated	4	5.88241	0.0028	upregulated	2	4.03232	0.0177	downregulated	4	4.15292	0.0157	upregulated	1	3.0209	0.0488	downregulated	4	2.73391	0.065	downregulated	3	3.52035	0.0296	downregulated	4	3.47686	0.0309
skeletal muscle fiber development	GO	6 out of 8	15.0284	upregulated	1	4.44264	0.0118	upregulated	1	2.86693	0.0569	downregulated	1	0.42605	0.6531					downregulated	1	1.46485	0.2311	downregulated	1	2.03825	0.1303	downregulated	1	1.8211	0.1618	downregulated	2	2.82072	0.0596
postsynaptic membrane assembly	GO	5 out of 8	15.0237	upregulated	2	4.34383	0.013					upregulated	1	1.96962	0.1395									downregulated	3	3.94462	0.0194	downregulated	3	3.00134	0.0497	downregulated	1	1.76431	0.1713
mitotic cell cycle phase transition	GO	3 out of 8	15.0187	upregulated	21	5.12675	0.0059	upregulated	26	20.5791	1.2e-09	downregulated	26	5.14984	0.0058	downregulated	18	5.88924	0.0028	upregulated	3	0.96856	0.3796	upregulated	13	0.981108	0.3749	upregulated	11	0.740339	0.477	downregulated	18	2.30161	0.1001
amino acid transport	GO	5 out of 8	14.9995	upregulated	6	6.26212	0.0019	upregulated	2	2.77772	0.0622	upregulated	5	8.49919	0.0002	downregulated	5	2.18313	0.1127	upregulated	3	2.36674	0.0938	upregulated	7	2.73096	0.0652	downregulated	8	1.75568	0.1728	downregulated	9	2.98566	0.0505
negative regulation of supramolecular fiber organization	GO	7 out of 8	14.986	upregulated	13	4.27664	0.0139	upregulated	8	1.89533	0.1503	upregulated	6	1.79168	0.1667	downregulated	5	5.48423	0.0042	downregulated	8	3.78928	0.0226	downregulated	14	3.6317	0.0265	downregulated	9	2.13922	0.1177	downregulated	8	2.94639	0.0525
methyltransferase activity	GO	4 out of 8	14.9349	upregulated	15	2.50005	0.0821	upregulated	18	9.94636	4.8e-05	upregulated	7	3.74503	0.0236	upregulated	3	6.71306	0.0012	upregulated	3	2.27681	0.1026	upregulated	11	0.682677	0.5053	upregulated	23	3.05428	0.0472	upregulated	18	1.95587	0.1414
small nuclear ribonucleoprotein complex	GO	7 out of 8	14.9208	upregulated	2	2.03978	0.1301	upregulated	7	7.9803	0.0003	upregulated	2	2.61438	0.0732	upregulated	1	0.897079	0.4078	downregulated	2	0.952076	0.3859	downregulated	4	1.25976	0.2837	downregulated	2	1.04889	0.3503	upregulated	9	1.87145	0.1539
caveola	GO	3 out of 8	14.9144	upregulated	3	2.21929	0.1087	upregulated	5	9.77661	5.7e-05	upregulated	6	4.8049	0.0082	downregulated	4	2.02212	0.1324	downregulated	7	4.67547	0.0093	downregulated	10	6.20181	0.002	downregulated	8	4.03711	0.0176	downregulated	3	2.40833	0.09
negative regulation of transport	GO	5 out of 8	14.8195	upregulated	19	2.11193	0.121	upregulated	15	6.88076	0.001	downregulated	26	3.38901	0.0337	downregulated	20	3.26979	0.038	downregulated	24	8.17569	0.0003	downregulated	40	10.073	4.2e-05	upregulated	28	8.45125	0.0002	downregulated	23	2.68815	0.068
polyol transport	GO	5 out of 8	14.8104	upregulated	3	5.1678	0.0057					downregulated	1	3.51201	0.0298					downregulated	1	1.9515	0.1421	downregulated	1	2.95995	0.0518	downregulated	1	2.83516	0.0587	downregulated	3	5.408	0.0045
axonal transport	GO	6 out of 8	14.6165	downregulated	2	2.98459	0.0506	downregulated	2	1.13841	0.3203	upregulated	2	1.39359	0.2482	upregulated	1	1.38118	0.2513	downregulated	3	1.92272	0.1462	downregulated	7	3.84246	0.0214	downregulated	5	3.26235	0.0383	downregulated	5	3.95262	0.0192
racemase and epimerase activity	GO	6 out of 8	14.6065	upregulated	2	2.39788	0.0909	upregulated	2	3.2905	0.0372									downregulated	1	1.78181	0.1683	downregulated	1	2.01732	0.133	downregulated	1	2.37275	0.0932	downregulated	1	2.74628	0.0642
phenol-containing compound metabolic process	GO	6 out of 8	14.5472	upregulated	5	1.7938	0.1663	upregulated	2	4.3338	0.0131	upregulated	4	2.76784	0.0628	downregulated	5	3.51999	0.0296	downregulated	5	4.43388	0.0119	downregulated	6	4.09419	0.0167	downregulated	5	1.89627	0.1501	downregulated	3	1.51521	0.2198
negative regulation of proteasomal protein catabolic process	GO	8 out of 8	14.5191	upregulated	5	2.98658	0.0505	upregulated	2	0.978999	0.3757	upregulated	3	1.41594	0.2427	upregulated	1	1.88422	0.1519	downregulated	3	1.9786	0.1383	downregulated	5	1.84749	0.1576	downregulated	4	1.64937	0.1922	downregulated	3	1.77791	0.169
positive regulation of viral release from host cell	GO	6 out of 8	14.4407	upregulated	1	1.25966	0.2838	upregulated	3	5.24485	0.0053	upregulated	1	1.41871	0.242					downregulated	1	1.75929	0.1722	downregulated	2	2.3967	0.091	downregulated	2	2.36151	0.0943
positive regulation of renal sodium excretion	GO	4 out of 8	14.4052					upregulated	1	4.02911	0.0178	upregulated	3	4.90902	0.0074	upregulated	2	6.01302	0.0024					downregulated	1	0.381831	0.6826	upregulated	1	0.306707	0.7359	upregulated	1	0.621121	0.5373
regulation of blood circulation	GO	5 out of 8	14.405	downregulated	4	3.86166	0.021	upregulated	8	3.58376	0.0278	downregulated	17	3.55541	0.0286	downregulated	11	2.84128	0.0584	downregulated	14	4.33423	0.0131	downregulated	20	5.60901	0.0037	downregulated	23	6.44088	0.0016	downregulated	17	4.69544	0.0091
ERAD pathway	GO	6 out of 8	14.3599	upregulated	7	3.07385	0.0462	upregulated	10	9.25656	9.5e-05	upregulated	3	0.876082	0.4164	downregulated	4	0.903255	0.4052	downregulated	3	1.55617	0.2109	downregulated	6	0.905924	0.4042	downregulated	4	0.615765	0.5402	upregulated	9	1.02121	0.3602
regulation of vascular permeability	GO	6 out of 8	14.3486	upregulated	1	3.28643	0.0374	upregulated	1	0.546181	0.5792	upregulated	4	6.22483	0.002	upregulated	1	2.00878	0.1342	downregulated	2	2.04531	0.1293	downregulated	3	1.92423	0.146	upregulated	1	1.63073	0.1958	upregulated	1	0.0564823	0.9451
negative regulation of calcium ion transmembrane transporter activity	GO	8 out of 8	14.3156	upregulated	2	1.60355	0.2012	upregulated	2	1.77467	0.1695	upregulated	2	1.56472	0.2091	upregulated	1	1.83496	0.1596	downregulated	1	2.17655	0.1134	downregulated	3	2.59349	0.0748	downregulated	3	2.30452	0.0998	downregulated	1	0.463142	0.6293
positive regulation of protein depolymerization	GO	8 out of 8	14.2498	upregulated	1	1.13166	0.3225	upregulated	1	2.26145	0.1042	upregulated	2	2.24949	0.1055	upregulated	1	1.7117	0.1806	downregulated	1	0.89552	0.4084	downregulated	2	1.82152	0.1618	downregulated	2	2.41218	0.0896	downregulated	2	1.76625	0.171
protein localization to endosome	GO	4 out of 8	14.2327	downregulated	1	2.80853	0.0603	downregulated	1	1.594	0.2031	downregulated	1	0.6967	0.4982	downregulated	1	1.3244	0.266	downregulated	2	5.80874	0.003	downregulated	2	4.47492	0.0114	downregulated	3	4.34641	0.013	downregulated	2	6.02629	0.0024
ATP metabolic process	GO	6 out of 8	14.1987	upregulated	7	0.835279	0.4338	downregulated	3	1.35707	0.2574	upregulated	5	2.20918	0.1098	downregulated	2	0.168818	0.8447	downregulated	8	2.8856	0.0558	downregulated	20	7.3538	0.0006	downregulated	14	0.978225	0.376	downregulated	5	1.46253	0.2316
carboxy-lyase activity	GO	4 out of 8	13.9584	downregulated	2	5.84615	0.0029	upregulated	3	3.12493	0.0439	upregulated	5	8.14633	0.0003	upregulated	2	8.26854	0.0003													downregulated	2	0.26475	0.7674
anion transmembrane transport	GO	5 out of 8	13.9037	upregulated	16	5.03261	0.0065	upregulated	7	0.966879	0.3803	upregulated	8	6.2706	0.0019	downregulated	17	6.12541	0.0022	downregulated	9	4.48501	0.0113	downregulated	22	4.58112	0.0102	downregulated	25	5.3628	0.0047	upregulated	15	5.70298	0.0033
cell cortex	GO	4 out of 8	13.8934	upregulated	14	3.34547	0.0352	upregulated	14	2.93862	0.0529	downregulated	37	15.4706	1.9e-07	downregulated	21	8.34804	0.0002	downregulated	15	4.43703	0.0118	downregulated	28	4.86598	0.0077	downregulated	21	2.7339	0.065	downregulated	19	1.8565	0.1562
transferase activity, transferring hexosyl groups	GO	6 out of 8	13.8425	upregulated	6	3.22903	0.0396	upregulated	9	2.79401	0.0612	upregulated	9	5.83418	0.0029	downregulated	8	1.40262	0.246	downregulated	7	1.58662	0.2046	downregulated	16	2.4346	0.0876	upregulated	16	2.30416	0.0998	downregulated	13	1.67078	0.1881
hormone receptor binding	GO	6 out of 8	13.8163	upregulated	6	0.480356	0.6186	upregulated	5	0.303061	0.7386	downregulated	16	3.18753	0.0413	upregulated	5	5.45249	0.0043	downregulated	9	5.84603	0.0029	downregulated	11	3.39349	0.0336	downregulated	8	2.624	0.0725	downregulated	8	1.52836	0.2169
positive regulation of protein localization to membrane	GO	6 out of 8	13.7624	upregulated	9	2.46517	0.085	upregulated	5	1.9531	0.1418	downregulated	8	2.29025	0.1012	downregulated	6	2.96586	0.0515	downregulated	9	3.80747	0.0222	downregulated	11	5.04773	0.0064	downregulated	12	2.48233	0.0835	downregulated	9	3.26275	0.0383
phosphoprotein phosphatase activity	GO	4 out of 8	13.7151	upregulated	17	3.2025	0.0407	upregulated	6	0.892983	0.4094	downregulated	20	4.15769	0.0156	upregulated	2	1.2374	0.2901	downregulated	8	2.91703	0.0541	downregulated	15	3.28557	0.0374	downregulated	11	3.58223	0.0278	downregulated	15	3.93029	0.0196
regulation of muscle contraction	GO	5 out of 8	13.6862	downregulated	3	3.60728	0.0271	upregulated	5	2.87198	0.0566	downregulated	11	4.58511	0.0102	downregulated	6	3.60449	0.0272	downregulated	6	5.78864	0.0031	downregulated	8	6.47664	0.0015	downregulated	9	5.83722	0.0029	downregulated	8	4.50856	0.011
suckling behavior	GO	4 out of 8	13.6785	upregulated	2	2.20255	0.1105	upregulated	1	1.69083	0.1844									downregulated	2	5.20857	0.0055	downregulated	2	3.45381	0.0316	downregulated	2	3.36224	0.0347	downregulated	2	1.65389	0.1913
regulation of transmission of nerve impulse	GO	6 out of 8	13.5746	upregulated	1	4.36763	0.0127					downregulated	1	3.50549	0.03	upregulated	1	2.84587	0.0581	downregulated	1	2.68233	0.0684	downregulated	1	2.50209	0.0819	downregulated	1	2.00931	0.1341	downregulated	1	2.67291	0.0691
energy derivation by oxidation of organic compounds	GO	7 out of 8	13.5544	upregulated	10	1.73062	0.1772	upregulated	9	2.75961	0.0633	upregulated	6	2.32004	0.0983	downregulated	7	2.04293	0.1296	downregulated	8	1.75537	0.1728	downregulated	20	5.00866	0.0067	downregulated	16	0.906084	0.4041	downregulated	10	1.11695	0.3273
body fluid secretion	GO	7 out of 8	13.5004	downregulated	2	2.61831	0.0729	upregulated	1	1.92434	0.146	upregulated	2	0.59033	0.5541	upregulated	1	1.28976	0.2753	downregulated	3	1.7925	0.1665	downregulated	5	2.86149	0.0572	downregulated	6	2.56126	0.0772	downregulated	5	5.09907	0.0061
nodal signaling pathway	GO	5 out of 8	13.4935	upregulated	3	7.42387	0.0006					upregulated	1	1.24646	0.2875	upregulated	1	3.27105	0.038					upregulated	1	0.597901	0.55	downregulated	1	0.56803	0.5666	downregulated	2	1.58202	0.2056
regulation of actin filament organization	GO	5 out of 8	13.4454	upregulated	15	3.83809	0.0215	upregulated	12	4.93548	0.0072	downregulated	23	5.4434	0.0043	downregulated	10	5.45805	0.0043	downregulated	15	5.66376	0.0035	downregulated	25	8.02364	0.0003	downregulated	18	3.96364	0.019	upregulated	19	2.07776	0.1252
establishment or maintenance of apical/basal cell polarity	GO	6 out of 8	13.4331	upregulated	2	0.840449	0.4315	downregulated	2	3.79299	0.0225	downregulated	2	0.799609	0.4495	upregulated	1	2.96545	0.0515	downregulated	2	3.53117	0.0293	downregulated	4	3.05745	0.047	downregulated	4	2.93146	0.0533	downregulated	3	4.69967	0.0091
vasoconstriction	GO	5 out of 8	13.3839	upregulated	1	3.2221	0.0399	upregulated	2	6.15293	0.0021	downregulated	1	0.31995	0.7262					downregulated	2	1.33845	0.2623	downregulated	4	3.5065	0.03	downregulated	2	1.17368	0.3092	upregulated	3	1.68981	0.1846
maintenance of cell polarity	GO	4 out of 8	13.3733									downregulated	2	3.79041	0.0226	upregulated	1	4.14385	0.0159	downregulated	1	2.15194	0.1163	downregulated	3	5.83874	0.0029	downregulated	3	5.97141	0.0026	downregulated	3	3.20165	0.0407
modified amino acid binding	GO	7 out of 8	13.271	upregulated	3	1.15652	0.3146	upregulated	3	6.30373	0.0018	upregulated	3	1.00775	0.365	downregulated	3	5.89371	0.0028	downregulated	1	0.544254	0.5803	downregulated	9	3.25722	0.0385	downregulated	10	4.61428	0.0099	downregulated	7	2.28099	0.1022
positive regulation of signaling receptor activity	GO	7 out of 8	13.1815					upregulated	1	0.432523	0.6489	upregulated	3	3.5691	0.0282	upregulated	1	2.04584	0.1293	downregulated	1	0.397418	0.6721	downregulated	5	2.53095	0.0796	downregulated	6	1.5776	0.2065	downregulated	4	2.62804	0.0722
positive regulation of proteasomal protein catabolic process	GO	5 out of 8	13.1703	upregulated	7	1.86947	0.1542	upregulated	6	2.65153	0.0705	downregulated	8	2.28251	0.102	downregulated	4	0.615762	0.5402	downregulated	6	3.008	0.0494	downregulated	12	5.9722	0.0025	downregulated	9	4.60832	0.01	upregulated	8	2.04096	0.1299
cell cycle phase transition	GO	3 out of 8	13.1442	upregulated	21	4.73257	0.0088	upregulated	26	19.7784	2.6e-09	downregulated	27	5.24249	0.0053	downregulated	19	6.40972	0.0016	upregulated	3	0.928056	0.3953	upregulated	13	0.940376	0.3905	upregulated	11	0.718055	0.4877	downregulated	18	2.15394	0.116
negative regulation of calcium ion transmembrane transport	GO	8 out of 8	13.1248	upregulated	2	1.42897	0.2396	upregulated	2	1.57652	0.2067	upregulated	2	1.37531	0.2528	upregulated	1	1.71624	0.1797	downregulated	1	2.03603	0.1305	downregulated	3	2.44963	0.0863	downregulated	3	2.16281	0.115	downregulated	1	0.379321	0.6843
sensory perception of light stimulus	GO	6 out of 8	13.1189	upregulated	9	3.96252	0.019	upregulated	4	1.25245	0.2858	upregulated	7	2.15518	0.1159	downregulated	6	2.42118	0.0888	downregulated	10	3.79341	0.0225	downregulated	15	3.37965	0.0341	downregulated	14	2.99873	0.0499	upregulated	6	2.00183	0.1351
synaptic vesicle recycling	GO	5 out of 8	13.1112	upregulated	3	2.32915	0.0974					upregulated	2	1.31492	0.2685	downregulated	2	1.12094	0.326	downregulated	3	2.12512	0.1194	downregulated	8	7.98241	0.0003	downregulated	6	4.99017	0.0068	upregulated	4	4.50965	0.011
oxidative phosphorylation	GO	4 out of 8	13.0793	upregulated	4	1.05577	0.3479	upregulated	3	1.17225	0.3097	upregulated	2	0.709627	0.4918					downregulated	6	3.71222	0.0244	downregulated	12	6.45472	0.0016	downregulated	7	1.04644	0.3512	downregulated	3	1.86593	0.1548
chemosensory behavior	GO	4 out of 8	13.0468	downregulated	1	2.08746	0.124					downregulated	1	0.533206	0.5867					downregulated	3	3.78211	0.0228	downregulated	3	4.74881	0.0087	downregulated	4	4.06426	0.0172	downregulated	3	3.07225	0.0463
neuron recognition	GO	5 out of 8	12.8454	upregulated	3	3.12445	0.044	downregulated	1	0.973977	0.3776	downregulated	2	3.07031	0.0464	downregulated	2	2.08523	0.1243	downregulated	2	2.3469	0.0957	downregulated	6	5.83263	0.0029	downregulated	8	5.47879	0.0042	downregulated	5	2.19218	0.1117
diacylglycerol binding	GO	5 out of 8	12.8299	upregulated	2	5.5267	0.004					downregulated	1	1.66595	0.189					downregulated	1	2.02893	0.1315	downregulated	1	2.4071	0.0901	downregulated	1	2.21068	0.1096	downregulated	2	2.3224	0.098
membrane repolarization during action potential	GO	5 out of 8	12.8151					upregulated	1	1.49829	0.2235	downregulated	1	2.10689	0.1216					downregulated	1	3.06913	0.0465	downregulated	1	2.91645	0.0541	downregulated	1	3.76768	0.0231	downregulated	2	3.67042	0.0255
membrane repolarization during cardiac muscle cell action potential	GO	5 out of 8	12.8151					upregulated	1	1.49829	0.2235	downregulated	1	2.10689	0.1216					downregulated	1	3.06913	0.0465	downregulated	1	2.91645	0.0541	downregulated	1	3.76768	0.0231	downregulated	2	3.67042	0.0255
cation-transporting ATPase complex	GO	4 out of 8	12.7857																	downregulated	1	2.70123	0.0671	downregulated	1	3.15258	0.0427	downregulated	1	4.27624	0.0139	downregulated	1	2.65562	0.0703
regulation of blood pressure	GO	6 out of 8	12.7129	upregulated	3	3.03247	0.0482	upregulated	6	1.34807	0.2597	downregulated	8	3.10546	0.0448	upregulated	3	1.77235	0.1699	downregulated	6	2.57491	0.0762	downregulated	9	2.82915	0.0591	downregulated	7	3.45249	0.0317	upregulated	9	2.29654	0.1006
response to dopamine	GO	6 out of 8	12.7088	upregulated	1	1.82578	0.1611	upregulated	1	4.00095	0.0183	downregulated	2	2.25905	0.1044	downregulated	1	1.26347	0.2827	downregulated	2	3.46113	0.0314	downregulated	2	2.69482	0.0676	downregulated	3	2.88941	0.0556	downregulated	1	1.35924	0.2569
cellular response to dopamine	GO	6 out of 8	12.7088	upregulated	1	1.82578	0.1611	upregulated	1	4.00095	0.0183	downregulated	2	2.25905	0.1044	downregulated	1	1.26347	0.2827	downregulated	2	3.46113	0.0314	downregulated	2	2.69482	0.0676	downregulated	3	2.88941	0.0556	downregulated	1	1.35924	0.2569
mRNA cap binding complex	GO	4 out of 8	12.7026									upregulated	1	1.68158	0.1861	downregulated	1	2.51027	0.0812	downregulated	2	3.88251	0.0206	downregulated	2	3.56331	0.0283	downregulated	2	1.78216	0.1683	downregulated	2	3.47458	0.031
regulation of cardiac conduction	GO	6 out of 8	12.6601	downregulated	1	0.256353	0.7739	upregulated	3	4.52643	0.0108	upregulated	4	2.17103	0.1141	downregulated	3	1.15184	0.3161	downregulated	3	0.780563	0.4581	downregulated	4	2.14816	0.1167	downregulated	7	2.46154	0.0853	downregulated	4	1.9806	0.138
acetylcholine binding	GO	4 out of 8	12.5995																	downregulated	1	3.42073	0.0327	downregulated	1	3.08014	0.046	downregulated	2	2.21014	0.1097	downregulated	2	3.88849	0.0205
guanyl-nucleotide exchange factor complex	GO	6 out of 8	12.5579	upregulated	4	7.03718	0.0009	upregulated	1	3.85334	0.0212	downregulated	3	3.19295	0.0411	downregulated	1	1.74171	0.1752	downregulated	1	2.33942	0.0964	downregulated	1	1.90337	0.1491	downregulated	1	1.87421	0.1535	downregulated	1	0.485052	0.6157
regulation of early endosome to late endosome transport	GO	6 out of 8	12.5495	upregulated	2	2.55361	0.0778	upregulated	1	0.904334	0.4048	downregulated	1	0.594758	0.5517	downregulated	1	0.535548	0.5853	downregulated	2	3.04616	0.0475	downregulated	2	3.30658	0.0366	downregulated	2	2.65877	0.07	downregulated	1	1.21036	0.2981
positive regulation of mitochondrial membrane permeability	GO	5 out of 8	12.4209	downregulated	1	1.20197	0.3006									upregulated	1	2.80872	0.0603	downregulated	1	2.04388	0.1295	downregulated	1	2.54009	0.0789	downregulated	2	3.65086	0.026	downregulated	2	2.57934	0.0758
cell-cell adhesion mediated by cadherin	GO	5 out of 8	12.2742	upregulated	2	3.35486	0.0349					upregulated	1	4.82471	0.008					downregulated	1	1.22942	0.2925	downregulated	2	1.74046	0.1754	downregulated	2	1.87793	0.1529	upregulated	1	0.753214	0.4709
apoptotic process involved in development	GO	4 out of 8	12.2709	upregulated	1	2.67367	0.069					downregulated	2	1.47933	0.2278	downregulated	2	2.59324	0.0748	downregulated	3	6.78762	0.0011	downregulated	3	5.39473	0.0045	downregulated	3	3.42373	0.0326	upregulated	2	1.9363	0.1442
sensory perception of mechanical stimulus	GO	6 out of 8	12.2469	upregulated	9	3.47676	0.0309	upregulated	4	2.40727	0.0901	downregulated	12	6.23835	0.002	upregulated	1	1.95607	0.1414	downregulated	7	4.48748	0.0112	downregulated	12	5.75091	0.0032	downregulated	12	5.30013	0.005	upregulated	9	4.89342	0.0075
membrane repolarization	GO	5 out of 8	12.2201					upregulated	1	1.36754	0.2547	downregulated	1	1.96682	0.1399					downregulated	1	2.91885	0.054	downregulated	1	2.76683	0.0629	downregulated	1	3.61541	0.0269	downregulated	2	3.51834	0.0296
positive regulation of membrane permeability	GO	5 out of 8	12.1954	downregulated	1	1.17125	0.31									upregulated	1	2.77282	0.0625	downregulated	1	1.97649	0.1386	downregulated	1	2.50012	0.0821	downregulated	2	3.60972	0.0271	downregulated	2	2.5075	0.0815
platelet activation	GO	5 out of 8	12.194	upregulated	5	1.40952	0.2443	upregulated	5	4.71635	0.0089	downregulated	11	4.28129	0.0138	downregulated	7	2.26965	0.1033	downregulated	8	4.28656	0.0138	downregulated	15	6.1443	0.0021	downregulated	12	5.88033	0.0028	upregulated	6	3.69209	0.0249
presynapse assembly	GO	6 out of 8	12.1653	upregulated	2	2.87671	0.0563	upregulated	1	1.22969	0.2924	upregulated	2	3.7524	0.0235	upregulated	1	3.47291	0.031					downregulated	2	1.40584	0.2452	downregulated	3	1.85108	0.1571	downregulated	1	1.32902	0.2647
negative regulation of vascular smooth muscle cell proliferation	GO	3 out of 8	12.0959	upregulated	3	8.42688	0.0002					upregulated	2	2.62938	0.0721	upregulated	1	3.29365	0.0371					upregulated	1	0.864231	0.4214	upregulated	1	0.518702	0.5953	upregulated	2	0.871118	0.4185
cellular response to catecholamine stimulus	GO	5 out of 8	12.0369	upregulated	3	3.20331	0.0406	downregulated	1	3.69315	0.0249	downregulated	3	1.38596	0.2501	downregulated	1	0.433549	0.6482	downregulated	4	5.49005	0.0041	downregulated	5	4.13486	0.016	downregulated	5	3.14011	0.0433	downregulated	2	1.58119	0.2057
reflex	GO	4 out of 8	12.0291					downregulated	1	1.2602	0.2836	downregulated	1	0.260223	0.7709					downregulated	2	2.83799	0.0585	downregulated	3	5.0742	0.0063	downregulated	4	4.75224	0.0086	downregulated	1	0.885141	0.4127
endosomal transport	GO	5 out of 8	11.9899	upregulated	13	3.12298	0.044	upregulated	8	1.36883	0.2544	upregulated	10	4.98914	0.0068	downregulated	14	4.28182	0.0138	downregulated	9	2.81714	0.0598	downregulated	17	2.76096	0.0632	upregulated	25	3.06918	0.0465	downregulated	14	3.86093	0.021
voltage-gated potassium channel activity involved in cardiac muscle cell action potential repolarization	GO	4 out of 8	11.9695									downregulated	1	2.30464	0.0998					downregulated	1	3.28084	0.0376	downregulated	1	3.12739	0.0438	downregulated	1	3.98172	0.0187	downregulated	2	3.88422	0.0206
amyloid-beta binding	GO	4 out of 8	11.9616	downregulated	2	2.14848	0.1167	upregulated	2	1.4081	0.2446	downregulated	8	11.5467	9.7e-06	downregulated	11	15.1051	2.8e-07	downregulated	4	1.92651	0.1457	downregulated	7	3.89248	0.0204	downregulated	7	4.30482	0.0135	downregulated	3	1.83784	0.1592
vesicle organization	GO	7 out of 8	11.892	upregulated	14	3.05366	0.0472	upregulated	16	3.54275	0.0289	upregulated	10	1.51831	0.2191	downregulated	16	2.98513	0.0505	downregulated	12	1.92234	0.1463	downregulated	21	2.55107	0.078	downregulated	14	1.0239	0.3592	downregulated	18	1.26514	0.2822
excretion	GO	5 out of 8	11.8168					downregulated	1	2.31471	0.0988	upregulated	4	4.88257	0.0076	downregulated	2	1.6762	0.1871	downregulated	2	2.31016	0.0992	downregulated	3	3.60043	0.0273	downregulated	3	3.38756	0.0338	downregulated	3	1.62698	0.1965
vesicle cytoskeletal trafficking	GO	5 out of 8	11.8162	downregulated	2	3.08329	0.0458	upregulated	1	0.292535	0.7464	downregulated	3	1.6513	0.1918	downregulated	1	1.60629	0.2006	downregulated	4	4.57973	0.0103	downregulated	7	4.76759	0.0085	downregulated	5	5.29657	0.005	downregulated	4	3.22062	0.0399
pigment cell differentiation	GO	4 out of 8	11.8109	upregulated	2	3.84553	0.0214	upregulated	2	3.48544	0.0306	downregulated	1	0.535548	0.5853					downregulated	2	2.91624	0.0541	downregulated	2	2.09919	0.1226	downregulated	1	1.80704	0.1641	upregulated	4	3.47921	0.0308
Gemini of coiled bodies	GO	6 out of 8	11.7957	upregulated	2	2.32916	0.0974	upregulated	2	3.05651	0.0471									downregulated	1	1.39004	0.2491	downregulated	1	1.7621	0.1717	downregulated	1	1.81487	0.1629	downregulated	1	1.44303	0.2362
regulation of viral release from host cell	GO	6 out of 8	11.7231	upregulated	2	0.902306	0.4056	upregulated	4	4.9931	0.0068	upregulated	1	0.684074	0.5046					downregulated	1	1.129	0.3234	downregulated	3	1.47781	0.2281	downregulated	4	3.32558	0.036	upregulated	1	0.788771	0.4544
ubiquitin conjugating enzyme activity	GO	5 out of 8	11.6518	upregulated	6	3.088	0.0456	upregulated	3	2.24593	0.1058	upregulated	2	1.40601	0.2451	downregulated	2	0.639568	0.5275	downregulated	3	3.20319	0.0406	downregulated	6	5.18264	0.0056	upregulated	9	2.83437	0.0588	downregulated	2	2.99748	0.0499
positive regulation of ubiquitin-dependent protein catabolic process	GO	6 out of 8	11.6174	upregulated	7	2.15602	0.1158	upregulated	5	2.97356	0.0511	downregulated	10	5.23299	0.0053	upregulated	1	1.68774	0.1849	downregulated	5	2.78888	0.0615	downregulated	11	5.72885	0.0033	downregulated	8	3.63099	0.0265	upregulated	7	2.11566	0.1206
UDP-glycosyltransferase activity	GO	6 out of 8	11.6145	upregulated	2	1.68795	0.1849	upregulated	6	2.8271	0.0592	upregulated	6	4.78976	0.0083	downregulated	7	1.86025	0.1556	downregulated	6	2.29655	0.1006	downregulated	14	3.2371	0.0393	upregulated	10	3.10802	0.0447	downregulated	8	1.74431	0.1748
cellular modified amino acid metabolic process	GO	5 out of 8	11.5904	downregulated	2	0.10756	0.898	upregulated	9	4.43891	0.0118	upregulated	4	5.43077	0.0044	downregulated	5	0.756416	0.4693	downregulated	4	1.37096	0.2539	downregulated	8	0.534895	0.5857	downregulated	12	1.80475	0.1645	upregulated	10	1.12592	0.3244
channel inhibitor activity	GO	5 out of 8	11.5607	upregulated	4	2.97366	0.0511	upregulated	3	5.44871	0.0043	downregulated	3	0.665527	0.514	downregulated	1	0.44446	0.6412	downregulated	2	2.19867	0.111	downregulated	4	1.48247	0.2271	downregulated	3	1.9571	0.1413	upregulated	3	1.3899	0.2491
response to monoamine	GO	5 out of 8	11.5373	upregulated	3	3.04033	0.0478	downregulated	1	3.57121	0.0281	downregulated	3	1.26599	0.282	downregulated	1	0.396885	0.6724	downregulated	4	5.22931	0.0054	downregulated	5	3.89493	0.0203	downregulated	5	3.08008	0.046	downregulated	2	1.52677	0.2172
response to catecholamine	GO	5 out of 8	11.5373	upregulated	3	3.04033	0.0478	downregulated	1	3.57121	0.0281	downregulated	3	1.26599	0.282	downregulated	1	0.396885	0.6724	downregulated	4	5.22931	0.0054	downregulated	5	3.89493	0.0203	downregulated	5	3.08008	0.046	downregulated	2	1.52677	0.2172
positive regulation of ruffle assembly	GO	5 out of 8	11.5257	upregulated	1	1.26181	0.2831	upregulated	1	6.91158	0.001	downregulated	2	1.61918	0.1981	downregulated	1	2.4485	0.0864					downregulated	3	3.15408	0.0427	downregulated	3	2.1783	0.1132	downregulated	2	2.08762	0.124
behavioral defense response	GO	4 out of 8	11.5176	downregulated	2	1.49257	0.2248	downregulated	1	1.11978	0.3264	upregulated	4	10.6896	2.3e-05					downregulated	3	1.99079	0.1366	downregulated	3	2.53845	0.079	downregulated	4	3.28314	0.0375	downregulated	5	3.7052	0.0246
presynaptic membrane assembly	GO	5 out of 8	11.4339	upregulated	1	1.34549	0.2604					upregulated	2	4.36282	0.0127	upregulated	1	3.79028	0.0226					downregulated	2	1.96582	0.14	downregulated	3	2.68351	0.0683	downregulated	1	1.64883	0.1923
locomotory exploration behavior	GO	5 out of 8	11.3919	upregulated	1	2.96771	0.0514	upregulated	1	1.10056	0.3327									downregulated	1	1.10397	0.3316	downregulated	3	2.89137	0.0555	downregulated	4	3.32826	0.0359	upregulated	1	1.72839	0.1776
cell cortex region	GO	6 out of 8	11.3448	upregulated	1	4.51823	0.0109	upregulated	1	0.614485	0.5409	downregulated	8	9.7303	5.9e-05	downregulated	5	4.33075	0.0132	downregulated	4	4.02922	0.0178	downregulated	5	4.86742	0.0077	downregulated	5	6.81215	0.0011	downregulated	5	4.56431	0.0104
response to amino acid starvation	GO	6 out of 8	11.3364	upregulated	4	3.73865	0.0238	upregulated	3	4.38953	0.0124	upregulated	3	3.04125	0.0478	downregulated	3	2.38168	0.0924	downregulated	3	2.36578	0.0939	downregulated	3	1.19689	0.3021	downregulated	2	1.35015	0.2592	downregulated	2	0.677092	0.5081
transferase activity, transferring glycosyl groups	GO	6 out of 8	11.3238	upregulated	9	3.63038	0.0265	upregulated	12	3.47763	0.0309	upregulated	9	4.42915	0.0119	downregulated	10	2.18566	0.1124	downregulated	8	1.76806	0.1707	downregulated	19	1.52	0.2187	upregulated	23	3.06645	0.0466	downregulated	20	1.75067	0.1737
regulation of response to reactive oxygen species	GO	4 out of 8	11.3075	downregulated	3	2.44068	0.0871	upregulated	3	6.56697	0.0014	downregulated	4	3.49212	0.0304	downregulated	1	1.80789	0.164	downregulated	4	5.61548	0.0036	downregulated	5	3.99688	0.0184	downregulated	6	4.45447	0.0116	downregulated	3	2.86888	0.0568
CD4-positive, alpha-beta T cell activation	GO	5 out of 8	11.2972	downregulated	1	0.590184	0.5542	upregulated	1	4.65365	0.0095	downregulated	2	0.366688	0.693					downregulated	1	1.91817	0.1469	downregulated	1	1.72303	0.1785	downregulated	2	1.82895	0.1606	downregulated	2	2.13023	0.1188
myosin binding	GO	6 out of 8	11.2061	downregulated	3	6.2253	0.002	upregulated	1	0.172012	0.842	downregulated	9	4.47444	0.0114	upregulated	1	1.20345	0.3002	downregulated	4	2.43316	0.0878	downregulated	8	4.75935	0.0086	downregulated	6	1.7311	0.1771	downregulated	5	5.38143	0.0046
circadian rhythm	GO	5 out of 8	11.1973	upregulated	8	2.25304	0.1051	upregulated	8	4.68925	0.0092	upregulated	7	3.52738	0.0294	upregulated	4	3.9217	0.0198	downregulated	2	0.741937	0.4762	upregulated	9	0.449779	0.6378	upregulated	10	2.22381	0.1082	upregulated	14	1.26243	0.283
regulation of hydrogen peroxide-induced cell death	GO	5 out of 8	11.1759	downregulated	2	2.05066	0.1287	upregulated	2	4.6313	0.0097	downregulated	4	4.23203	0.0145	downregulated	1	2.15803	0.1156	downregulated	3	4.54176	0.0107	downregulated	4	3.57724	0.028	downregulated	5	4.44489	0.0117	downregulated	1	2.42145	0.0888
mitotic metaphase plate congression	GO	5 out of 8	11.1659	upregulated	4	3.07924	0.046	upregulated	5	4.72923	0.0088	downregulated	2	0.658793	0.5175	downregulated	1	0.363311	0.6954	downregulated	3	2.29685	0.1006	downregulated	3	1.57713	0.2066	downregulated	2	0.644858	0.5247	upregulated	2	0.139331	0.8699
regulation of ubiquitin-dependent protein catabolic process	GO	6 out of 8	11.1263	upregulated	12	2.36606	0.0939	upregulated	6	1.60098	0.2017	downregulated	12	2.40449	0.0903	upregulated	2	1.71872	0.1793	downregulated	6	2.44012	0.0872	downregulated	14	3.97181	0.0188	downregulated	12	3.04487	0.0476	upregulated	14	1.61176	0.1995
Derlin-1 retrotranslocation complex	GO	6 out of 8	11.1152	upregulated	1	1.76853	0.1706	upregulated	1	1.04588	0.3514					downregulated	1	1.43609	0.2379	downregulated	1	2.21047	0.1096	downregulated	1	2.72258	0.0657	downregulated	1	2.74777	0.0641	downregulated	1	2.05603	0.128
sialylation	GO	6 out of 8	11.0803	upregulated	1	2.10356	0.122	upregulated	1	2.26227	0.1041	downregulated	4	2.85892	0.0573	downregulated	2	5.12149	0.006	downregulated	1	2.34243	0.0961	downregulated	3	3.28607	0.0374	downregulated	5	3.99709	0.0184	downregulated	5	5.06925	0.0063
positive regulation of feeding behavior	GO	5 out of 8	11.0742	upregulated	1	1.68702	0.1851													downregulated	1	2.31658	0.0986	downregulated	1	2.33657	0.0967	downregulated	1	2.24382	0.1061	downregulated	1	2.49025	0.0829
acid secretion	GO	7 out of 8	11.0453	upregulated	2	3.32844	0.0358	upregulated	1	0.119722	0.8872	upregulated	3	6.15366	0.0021	downregulated	1	1.96343	0.1404	downregulated	1	0.183634	0.8322	downregulated	3	0.631219	0.5319	downregulated	4	1.26253	0.2829	downregulated	4	1.32957	0.2646
maintenance of protein localization in organelle	GO	6 out of 8	11.0371	upregulated	3	2.67907	0.0686	upregulated	4	6.22405	0.002	upregulated	2	1.38191	0.2511	downregulated	2	0.755334	0.4699	downregulated	1	0.653986	0.52	downregulated	1	0.712517	0.4904	downregulated	1	0.504822	0.6036	upregulated	4	0.363932	0.6949
ubiquitin-like protein conjugating enzyme binding	GO	6 out of 8	11.0223	upregulated	3	0.78939	0.4541	upregulated	2	0.665964	0.5138	upregulated	2	1.41322	0.2434	downregulated	1	0.750273	0.4722	downregulated	1	5.01601	0.0066	upregulated	7	5.57307	0.0038	downregulated	2	5.42038	0.0044	downregulated	2	4.04066	0.0176
polysaccharide metabolic process	GO	4 out of 8	10.9929	upregulated	2	1.0038	0.3665	downregulated	2	1.11472	0.328	upregulated	3	2.40883	0.0899	downregulated	7	5.14756	0.0058	downregulated	3	3.8278	0.0218	downregulated	5	3.5358	0.0291	downregulated	5	2.50791	0.0814	downregulated	4	1.12141	0.3258
metaphase plate congression	GO	6 out of 8	10.9904	upregulated	5	3.65812	0.0258	upregulated	5	3.89	0.0204	downregulated	2	0.459301	0.6317	downregulated	1	0.261945	0.7696	downregulated	3	1.90404	0.149	downregulated	4	1.44697	0.2353	downregulated	3	0.529031	0.5892	downregulated	2	0.283475	0.7532
nuclear chromosome segregation	GO	6 out of 8	10.9886	upregulated	12	1.97315	0.139	upregulated	16	7.85675	0.0004	upregulated	3	0.844514	0.4298	upregulated	1	0.237069	0.7889	downregulated	4	0.244434	0.7831	downregulated	8	0.166289	0.8468	upregulated	13	0.142459	0.8672	upregulated	10	0.19113	0.826
regulation of Golgi organization	GO	6 out of 8	10.9684	upregulated	2	2.99181	0.0502	upregulated	1	0.712587	0.4904	downregulated	2	2.56905	0.0766	downregulated	2	2.31012	0.0992	downregulated	2	3.36835	0.0344	downregulated	3	3.42	0.0327	downregulated	3	3.89629	0.0203	downregulated	1	1.45855	0.2326
cell-cell adhesion via plasma-membrane adhesion molecules	GO	5 out of 8	10.9622	upregulated	13	8.37044	0.0002	downregulated	5	1.17288	0.3095	downregulated	16	8.48411	0.0002	downregulated	7	5.20656	0.0055	downregulated	9	1.85242	0.1569	downregulated	23	7.4507	0.0006	downregulated	24	7.66987	0.0005	downregulated	11	0.482352	0.6173
regulation of synaptic vesicle endocytosis	GO	5 out of 8	10.9594	upregulated	1	1.01977	0.3607													downregulated	1	0.970807	0.3788	downregulated	4	5.48168	0.0042	downregulated	3	2.80717	0.0604	downregulated	1	0.679955	0.5066
nucleotide-activated protein kinase complex	GO	5 out of 8	10.9483	upregulated	1	1.48101	0.2274	upregulated	1	0.799311	0.4496	downregulated	1	0.459953	0.6313					downregulated	2	4.14456	0.0159	downregulated	2	3.75087	0.0235	downregulated	2	3.11751	0.0443	upregulated	2	1.88498	0.1518
hormone binding	GO	6 out of 8	10.8673	upregulated	2	2.18159	0.1129	upregulated	2	2.16227	0.1151	upregulated	5	3.75172	0.0235	upregulated	4	6.44646	0.0016	downregulated	2	1.49287	0.2247	downregulated	3	1.1956	0.3025	upregulated	8	1.40745	0.2448	upregulated	7	4.9558	0.007
positive regulation of potassium ion transmembrane transporter activity	GO	4 out of 8	10.8547									downregulated	1	0.486597	0.6147	downregulated	1	0.834101	0.4343	downregulated	1	3.45863	0.0315	downregulated	2	2.96967	0.0513	downregulated	3	2.9025	0.0549	downregulated	4	2.84465	0.0582
filopodium	GO	4 out of 8	10.8194	downregulated	3	4.70016	0.0091	downregulated	2	2.86329	0.0571	downregulated	8	1.21231	0.2975	upregulated	1	3.08964	0.0455	downregulated	8	4.97837	0.0069	downregulated	15	7.41543	0.0006	downregulated	14	7.23893	0.0007	upregulated	8	3.12724	0.0438
RNA polymerase II intronic transcription regulatory region sequence-specific DNA binding	GO	4 out of 8	10.8	upregulated	2	3.07353	0.0463	upregulated	2	3.73996	0.0238					upregulated	1	3.69858	0.0248									upregulated	1	0.53011	0.5885	downregulated	1	0.818031	0.4413
negative regulation of cellular protein catabolic process	GO	5 out of 8	10.6781	downregulated	1	2.03396	0.1308	upregulated	3	0.846149	0.4291	downregulated	5	1.554	0.2114	upregulated	1	1.48365	0.2268	downregulated	5	3.22998	0.0396	downregulated	8	3.01779	0.0489	downregulated	5	1.40554	0.2452	downregulated	5	2.17862	0.1132
pyridoxal phosphate binding	GO	4 out of 8	10.6663	upregulated	2	1.82344	0.1615	upregulated	2	2.36621	0.0938	upregulated	5	4.83151	0.008	upregulated	2	3.09774	0.0452					upregulated	3	0.214086	0.8073	upregulated	1	0.0637399	0.9382	upregulated	3	1.17478	0.3089
negative regulation of cellular response to insulin stimulus	GO	5 out of 8	10.6457	downregulated	3	2.95331	0.0522	upregulated	2	0.802745	0.4481	upregulated	1	0.460389	0.631					downregulated	1	5.00663	0.0067	downregulated	1	3.98287	0.0186	downregulated	1	3.53608	0.0291	upregulated	2	0.189667	0.8272
regulation of response to endoplasmic reticulum stress	GO	6 out of 8	10.6339	upregulated	6	1.97655	0.1385	upregulated	4	1.80422	0.1646	downregulated	5	1.76847	0.1706	downregulated	3	0.640742	0.5269	downregulated	5	3.1073	0.0447	downregulated	8	2.26053	0.1043	downregulated	5	2.11666	0.1204	downregulated	3	1.77783	0.169
negative regulation of growth	GO	5 out of 8	10.5997	downregulated	9	2.17313	0.1138	downregulated	4	3.71128	0.0244	downregulated	26	9.01304	0.0001	upregulated	5	3.10272	0.0449	downregulated	10	2.9748	0.0511	downregulated	13	6.54232	0.0014	downregulated	14	5.18892	0.0056	downregulated	16	7.68843	0.0005
BMP binding	GO	5 out of 8	10.5881	upregulated	1	1.04887	0.3503	downregulated	1	2.57767	0.076	upregulated	2	4.991	0.0068					downregulated	1	1.94339	0.1432	downregulated	2	2.44753	0.0865	downregulated	2	2.73499	0.0649
cellular response to fibroblast growth factor stimulus	GO	7 out of 8	10.5769	upregulated	9	4.87639	0.0076	upregulated	5	1.64546	0.1929	upregulated	7	4.35131	0.0129	downregulated	4	2.85379	0.0576	downregulated	4	0.84849	0.4281	downregulated	5	0.630286	0.5324	downregulated	8	0.325545	0.7221	downregulated	6	0.753232	0.4708
dendritic spine organization	GO	5 out of 8	10.5767	downregulated	1	0.771086	0.4625	downregulated	1	3.99667	0.0184	downregulated	4	2.8706	0.0567	upregulated	1	2.65985	0.07	downregulated	4	3.50017	0.0302	downregulated	6	4.29158	0.0137	downregulated	4	3.96783	0.0189	downregulated	3	3.79562	0.0225
kinesin complex	GO	3 out of 8	10.5203	downregulated	2	4.33468	0.0131	upregulated	3	3.05365	0.0472	downregulated	7	4.97892	0.0069	downregulated	5	4.84822	0.0078	downregulated	2	3.01488	0.0491	upregulated	7	3.04596	0.0476	downregulated	4	3.18879	0.0412	downregulated	4	4.31658	0.0133
response to pain	GO	5 out of 8	10.5123					upregulated	1	3.11637	0.0443	downregulated	3	0.930392	0.3944	downregulated	2	1.9185	0.1468	downregulated	3	2.15592	0.1158	downregulated	4	3.52654	0.0294	downregulated	4	3.47532	0.031	downregulated	3	1.08708	0.3372
nuclear envelope organization	GO	4 out of 8	10.5037					upregulated	3	1.62095	0.1977	downregulated	5	1.34418	0.2608	downregulated	1	0.222038	0.8009	downregulated	1	4.62223	0.0098	downregulated	2	3.6013	0.0273	downregulated	2	3.15702	0.0426	upregulated	3	0.931579	0.3939
plasma membrane raft	GO	5 out of 8	10.4963	upregulated	4	2.24313	0.1061	upregulated	5	8.77123	0.0002	downregulated	11	7.23228	0.0007	downregulated	6	5.23147	0.0053	downregulated	7	3.33361	0.0357	downregulated	11	5.11756	0.006	downregulated	10	3.49457	0.0304	downregulated	5	1.84309	0.1583
neuropeptide receptor activity	GO	4 out of 8	10.4319	upregulated	2	5.25447	0.0052					upregulated	2	2.01249	0.1337					upregulated	1	0.797589	0.4504	downregulated	4	1.86619	0.1547	downregulated	3	2.09629	0.1229
ubiquitin-specific protease binding	GO	7 out of 8	10.4185	upregulated	1	0.898419	0.4072	upregulated	1	0.684635	0.5043	upregulated	1	1.41306	0.2434	upregulated	1	3.31433	0.0364	downregulated	1	1.75929	0.1722	downregulated	1	1.43504	0.2381	downregulated	1	1.53584	0.2153	upregulated	2	0.622083	0.5368
parturition	GO	6 out of 8	10.4138									upregulated	2	2.71759	0.066	upregulated	1	2.49813	0.0822	downregulated	1	0.83873	0.4323	downregulated	1	1.30242	0.2719	downregulated	1	1.28521	0.2766	downregulated	2	1.77169	0.17
cell cycle DNA replication	GO	2 out of 8	10.3977	upregulated	4	5.41972	0.0044	upregulated	4	8.33587	0.0002	downregulated	3	1.83202	0.1601	downregulated	2	1.52587	0.2174
regulation of cellular protein catabolic process	GO	5 out of 8	10.3585	upregulated	19	2.92928	0.0534	upregulated	14	3.50156	0.0302	downregulated	16	2.82354	0.0594	downregulated	12	1.23931	0.2896	downregulated	10	2.26965	0.1033	downregulated	23	4.67494	0.0093	downregulated	16	2.28923	0.1013	upregulated	17	1.24335	0.2884
cellular lipid catabolic process	GO	4 out of 8	10.2182	downregulated	3	4.33484	0.0131	upregulated	13	7.94099	0.0004	upregulated	11	8.12444	0.0003	downregulated	8	2.24311	0.1061	upregulated	1	0.0583354	0.9433	downregulated	8	0.218619	0.8036	downregulated	9	0.570439	0.5653	upregulated	10	1.48131	0.2273
cell cycle G1/S phase transition	GO	4 out of 8	10.1998	upregulated	7	1.1765	0.3084	upregulated	14	12.9347	2.4e-06	upregulated	5	2.3156	0.0987	downregulated	11	5.5633	0.0038	upregulated	2	0.776528	0.46	upregulated	8	1.6582	0.1905	upregulated	4	1.35392	0.2582	downregulated	10	3.12495	0.0439
response to amyloid-beta	GO	5 out of 8	10.1497	downregulated	1	1.5617	0.2098	upregulated	1	3.15378	0.0427	upregulated	2	2.19167	0.1117	downregulated	2	0.960177	0.3828	downregulated	3	4.51341	0.011	downregulated	4	5.75492	0.0032	upregulated	3	4.48962	0.0112	downregulated	1	1.54744	0.2128
pigment metabolic process	GO	6 out of 8	10.1102	upregulated	3	0.924938	0.3966	upregulated	6	5.60997	0.0037	upregulated	6	4.95184	0.0071	upregulated	2	2.9897	0.0503	downregulated	1	0.752648	0.4711	downregulated	1	1.03342	0.3558	upregulated	5	1.71883	0.1793	upregulated	8	4.43351	0.0119
mitochondrial inner membrane	GO	3 out of 8	10.0877	upregulated	27	5.62562	0.0036	upregulated	15	5.36053	0.0047	upregulated	10	1.51302	0.2202	upregulated	2	0.351718	0.7035	downregulated	14	1.14693	0.3176	downregulated	48	10.8221	2e-05	downregulated	26	0.267854	0.765	upregulated	38	2.14914	0.1166
negative regulation of locomotion	GO	6 out of 8	10.0872	upregulated	20	6.04008	0.0024	upregulated	11	4.08111	0.0169	downregulated	31	6.43064	0.0016	downregulated	15	5.40643	0.0045	downregulated	14	3.89029	0.0204	downregulated	19	4.05986	0.0173	downregulated	22	2.97853	0.0509	downregulated	21	0.874438	0.4171
multivesicular body assembly	GO	6 out of 8	10.0448	upregulated	2	1.58792	0.2044	upregulated	3	2.86336	0.0571	upregulated	1	0.906522	0.4039	downregulated	1	0.617687	0.5392	downregulated	3	3.33616	0.0356	downregulated	3	1.88782	0.1514	downregulated	1	0.956341	0.3843	upregulated	3	0.875657	0.4166
regulation of TORC1 signaling	GO	6 out of 8	10.0211	upregulated	3	4.90055	0.0074	upregulated	3	5.60003	0.0037	upregulated	1	1.2601	0.2836	downregulated	4	5.1257	0.0059	downregulated	1	1.36141	0.2563	downregulated	1	0.84155	0.431	downregulated	3	0.988897	0.372	downregulated	3	1.45433	0.2336
GTP-dependent protein binding	GO	5 out of 8	10.0141	upregulated	1	3.98333	0.0186	downregulated	1	4.526	0.0108	downregulated	2	0.99144	0.371					downregulated	1	2.41364	0.0895	downregulated	3	3.50423	0.0301	downregulated	3	2.41364	0.0895	downregulated	1	3.21673	0.0401
insemination	GO	5 out of 8	9.98645	upregulated	1	1.91183	0.1478	upregulated	1	1.56547	0.209	upregulated	2	3.79799	0.0224	upregulated	1	2.97573	0.051					downregulated	1	0.560949	0.5707	upregulated	1	0.251253	0.7778	upregulated	1	0.574269	0.5631
response to fibroblast growth factor	GO	7 out of 8	9.96441	upregulated	9	4.48413	0.0113	upregulated	5	1.47745	0.2282	upregulated	7	4.07059	0.0171	downregulated	4	2.74357	0.0643	downregulated	4	0.753558	0.4707	downregulated	6	0.728795	0.4825	downregulated	10	0.480394	0.6185	downregulated	7	0.713062	0.4901
eating behavior	GO	6 out of 8	9.95563	upregulated	2	3.56741	0.0282	upregulated	1	1.0631	0.3454	upregulated	2	2.75885	0.0634	upregulated	1	1.694	0.1838	downregulated	1	0.634997	0.5299	downregulated	3	1.66667	0.1889	upregulated	1	0.508036	0.6017	upregulated	1	1.42938	0.2395
cellular respiration	GO	6 out of 8	9.94756	upregulated	8	1.64558	0.1929	upregulated	8	3.79241	0.0225	upregulated	4	1.81115	0.1635	downregulated	3	1.32457	0.2659	downregulated	6	1.47547	0.2287	downregulated	15	3.3917	0.0337	downregulated	11	0.658203	0.5178	upregulated	12	1.50239	0.2226
regulation of store-operated calcium entry	GO	5 out of 8	9.92503	downregulated	1	3.44466	0.0319	upregulated	1	1.1751	0.3088	downregulated	1	2.45583	0.0858	downregulated	1	3.19596	0.0409	downregulated	2	4.00282	0.0183	downregulated	2	5.20813	0.0055	downregulated	2	5.12736	0.0059	downregulated	3	3.50806	0.03
GTPase inhibitor activity	GO	3 out of 8	9.91811									downregulated	2	2.19231	0.1117	downregulated	2	2.68101	0.0685	downregulated	2	4.91604	0.0073	downregulated	2	4.04019	0.0176	downregulated	2	2.09489	0.1231	upregulated	1	1.13302	0.3221
myoblast fusion	GO	5 out of 8	9.87286	upregulated	1	1.3355	0.263					downregulated	1	0.584412	0.5574	downregulated	1	1.09641	0.3341	downregulated	2	2.72792	0.0654	downregulated	3	2.5243	0.0801	downregulated	2	3.12292	0.044	downregulated	1	1.84304	0.1583
negative regulation of response to endoplasmic reticulum stress	GO	6 out of 8	9.87254	upregulated	4	2.97988	0.0508	downregulated	2	1.63218	0.1955	upregulated	2	1.56112	0.2099	downregulated	1	0.274903	0.7596	downregulated	3	2.68322	0.0683	downregulated	4	2.23802	0.1067	downregulated	2	1.32274	0.2664	downregulated	1	0.994644	0.3699
negative regulation of neuron migration	GO	5 out of 8	9.78295	upregulated	2	3.19226	0.0411					upregulated	1	1.00732	0.3652					downregulated	1	1.18663	0.3052	upregulated	2	1.85574	0.1563	downregulated	2	2.11876	0.1202	downregulated	3	2.27798	0.1025
immune response-activating cell surface receptor signaling pathway	GO	4 out of 8	9.73829	upregulated	13	4.30273	0.0135	downregulated	3	5.39327	0.0045	downregulated	34	17.0163	4.1e-08	downregulated	26	22.4615	1.8e-10	downregulated	6	2.93881	0.0529	downregulated	10	3.06319	0.0467	downregulated	13	2.91276	0.0543	downregulated	16	0.823521	0.4389
peroxisome	GO	4 out of 8	9.70136	upregulated	9	3.08068	0.0459	upregulated	8	3.2511	0.0387	upregulated	10	5.9138	0.0027	downregulated	3	0.7916	0.4531	downregulated	5	2.37441	0.0931	downregulated	11	3.43166	0.0323	downregulated	8	1.95637	0.1414	downregulated	10	1.93893	0.1439
positive regulation of interleukin-6 secretion	GO	4 out of 8	9.5882	downregulated	2	2.93813	0.053					downregulated	3	1.93692	0.1441	downregulated	1	1.74579	0.1745	downregulated	1	3.26778	0.0381	downregulated	1	3.65252	0.0259	downregulated	1	3.61052	0.027	downregulated	2	5.67823	0.0034
respiratory chain complex I	GO	5 out of 8	9.58685	upregulated	3	1.59216	0.2035	downregulated	1	1.56139	0.2098									downregulated	3	2.23434	0.1071	downregulated	7	4.24027	0.0144	downregulated	2	0.593566	0.5524	downregulated	1	2.48792	0.0831
mitochondrial respiratory chain complex I	GO	4 out of 8	9.55609	upregulated	3	1.59216	0.2035	downregulated	1	1.56139	0.2098									downregulated	3	2.23434	0.1071	downregulated	7	4.24027	0.0144	downregulated	2	0.593566	0.5524	downregulated	1	2.48792	0.0831
cellular response to epinephrine stimulus	GO	5 out of 8	9.48698	upregulated	1	1.25093	0.2862	downregulated	1	4.91757	0.0073	downregulated	1	1.19067	0.304					downregulated	2	4.41445	0.0121	downregulated	2	3.70865	0.0245	downregulated	2	3.91454	0.0199	downregulated	1	2.30664	0.0996
sperm capacitation	GO	6 out of 8	9.45978	upregulated	1	0.479303	0.6192					upregulated	1	2.09066	0.1236	upregulated	1	3.8895	0.0205	upregulated	1	1.41627	0.2426	downregulated	2	0.8858	0.4124	downregulated	3	1.61217	0.1995	downregulated	2	1.91862	0.1468
ribonucleoprotein complex biogenesis	GO	6 out of 8	9.45762	upregulated	21	1.84708	0.1577	upregulated	26	5.9953	0.0025	upregulated	12	1.36392	0.2557	upregulated	3	0.418767	0.6579	upregulated	3	0.238856	0.7875	downregulated	20	0.432536	0.6489	downregulated	15	0.412512	0.662	upregulated	40	0.773636	0.4613
mitochondrion organization	GO	5 out of 8	9.43966	downregulated	9	1.36513	0.2553	upregulated	13	1.95798	0.1411	upregulated	15	4.07223	0.017	upregulated	3	1.15322	0.3156	upregulated	6	1.09202	0.3355	downregulated	40	4.68549	0.0092	upregulated	23	1.81486	0.1629	downregulated	19	0.477618	0.6203
specific granule lumen	GO	6 out of 8	9.42359	upregulated	3	1.69494	0.1836	upregulated	1	0.744801	0.4748	downregulated	4	2.05395	0.1282	downregulated	4	4.34455	0.013	downregulated	1	3.47481	0.031	downregulated	1	2.69467	0.0676	downregulated	2	2.57015	0.0765	downregulated	2	4.64272	0.0096
electron transfer activity	GO	4 out of 8	9.42221	downregulated	2	3.06658	0.0466	upregulated	8	5.70725	0.0033	upregulated	5	4.90936	0.0074	downregulated	4	2.77969	0.0621	downregulated	4	1.29435	0.2741	downregulated	8	1.85112	0.1571	upregulated	3	0.597222	0.5503	upregulated	4	0.676066	0.5086
cellular response to drug	GO	6 out of 8	9.40982	downregulated	9	6.14537	0.0021	upregulated	15	6.29059	0.0019	upregulated	13	4.71689	0.0089	downregulated	21	5.69058	0.0034	downregulated	14	1.72379	0.1784	downregulated	19	3.12894	0.0438	downregulated	22	1.66371	0.1894	downregulated	19	3.72185	0.0242
regulation of delayed rectifier potassium channel activity	GO	5 out of 8	9.36703	upregulated	2	2.47924	0.0838													downregulated	1	1.03396	0.3556	downregulated	2	1.51379	0.2201	downregulated	4	3.05271	0.0472	downregulated	2	1.28734	0.276
enzyme inhibitor activity	GO	3 out of 8	9.31679	upregulated	12	1.21415	0.297	upregulated	10	2.07821	0.1252	downregulated	14	1.43463	0.2382	downregulated	10	2.89975	0.055	downregulated	18	7.01937	0.0009	downregulated	19	4.56285	0.0104	downregulated	23	2.96841	0.0514	upregulated	20	5.23384	0.0053
smooth muscle contraction	GO	6 out of 8	9.29986	upregulated	2	3.91866	0.0199	upregulated	2	2.37934	0.0926	downregulated	5	4.46977	0.0114	downregulated	1	3.56204	0.0284	downregulated	4	2.10434	0.1219	downregulated	7	3.92004	0.0198	downregulated	6	2.22536	0.108	downregulated	7	2.78394	0.0618
neurotransmitter receptor activity involved in regulation of postsynaptic membrane potential	GO	4 out of 8	9.29873	upregulated	2	5.6122	0.0037									downregulated	1	1.07863	0.3401	downregulated	1	2.05562	0.128	downregulated	2	3.45527	0.0316	downregulated	2	3.48236	0.0307	upregulated	1	4.2281	0.0146
transmitter-gated ion channel activity involved in regulation of postsynaptic membrane potential	GO	4 out of 8	9.29873	upregulated	2	5.6122	0.0037									downregulated	1	1.07863	0.3401	downregulated	1	2.05562	0.128	downregulated	2	3.45527	0.0316	downregulated	2	3.48236	0.0307	upregulated	1	4.2281	0.0146
developmental pigmentation	GO	6 out of 8	9.28955	upregulated	2	3.50095	0.0302	upregulated	2	2.61576	0.0731	upregulated	2	2.11602	0.1205	upregulated	1	1.51453	0.2199	downregulated	2	2.08257	0.1246	upregulated	4	2.99528	0.05	upregulated	5	1.70972	0.1809	downregulated	3	2.16471	0.1148
negative regulation of cell motility	GO	6 out of 8	9.25472	upregulated	15	4.18284	0.0153	upregulated	9	3.27336	0.0379	downregulated	27	4.33533	0.0131	downregulated	14	6.03488	0.0024	downregulated	11	4.18324	0.0152	downregulated	15	4.21531	0.0148	downregulated	17	3.13148	0.0437	downregulated	17	0.638708	0.528
mitochondrial respiratory chain	GO	3 out of 8	9.25328	upregulated	5	1.93906	0.1438	upregulated	3	1.19407	0.303	upregulated	1	0.759201	0.468	downregulated	1	0.339459	0.7122	downregulated	5	2.80741	0.0604	downregulated	11	4.83109	0.008	upregulated	1	0.300653	0.7403	downregulated	2	1.91544	0.1473
regulation of microtubule binding	GO	4 out of 8	9.24316	upregulated	2	3.79393	0.0225					downregulated	1	0.879127	0.4151					downregulated	1	1.19254	0.3034	downregulated	2	3.36256	0.0346	downregulated	1	1.77325	0.1698
arginine metabolic process	GO	5 out of 8	9.2326									upregulated	1	1.90991	0.1481					downregulated	1	1.15252	0.3158	downregulated	1	1.78892	0.1671	downregulated	1	2.396	0.0911	downregulated	1	1.98526	0.1373
multicellular organism aging	GO	6 out of 8	9.20159					upregulated	1	0.417358	0.6588	upregulated	2	7.01671	0.0009	downregulated	1	0.839474	0.4319	downregulated	1	0.601809	0.5478	downregulated	3	1.10369	0.3316	downregulated	2	0.335886	0.7147	downregulated	1	0.565608	0.568
vesicle fusion	GO	5 out of 8	9.1949	upregulated	4	2.01208	0.1337	upregulated	5	3.79837	0.0224	downregulated	4	0.409796	0.6638	downregulated	4	1.69921	0.1828	upregulated	1	0.712086	0.4906	downregulated	5	1.83069	0.1603	downregulated	5	1.99953	0.1354	downregulated	6	2.37533	0.093
photoreceptor inner segment	GO	3 out of 8	9.15587	upregulated	2	0.868666	0.4195	upregulated	2	1.04778	0.3507	downregulated	5	3.86569	0.0209	downregulated	4	3.44406	0.0319	downregulated	3	2.15507	0.1159	downregulated	3	3.29976	0.0369	downregulated	4	3.70103	0.0247	upregulated	1	2.66969	0.0693
copulation	GO	5 out of 8	9.15308	upregulated	1	1.73426	0.1765	upregulated	1	1.38366	0.2507	upregulated	2	3.43556	0.0322	upregulated	1	2.78708	0.0616					downregulated	1	0.443416	0.6418	upregulated	1	0.175465	0.8391	upregulated	1	0.455428	0.6342
response to heat	GO	6 out of 8	9.14217	upregulated	8	3.37471	0.0342	upregulated	5	2.48225	0.0836	upregulated	3	1.13367	0.3219	downregulated	4	1.16463	0.312	upregulated	1	1.60927	0.2	downregulated	8	1.90304	0.1491	downregulated	5	1.42743	0.2399	downregulated	2	1.59497	0.2029
mitotic nuclear division	GO	6 out of 8	9.13487	upregulated	12	4.11284	0.0164	upregulated	13	8.5501	0.0002	downregulated	14	4.07017	0.0171	downregulated	6	1.90877	0.1483	downregulated	4	0.617125	0.5395	downregulated	8	0.502013	0.6053	downregulated	4	0.703098	0.495	downregulated	7	0.628637	0.5333
mitochondrial gene expression	GO	6 out of 8	9.03847	upregulated	11	4.06515	0.0172	upregulated	7	2.94399	0.0527	upregulated	6	2.15579	0.1158	downregulated	4	1.8924	0.1507	downregulated	2	0.0868691	0.9168	downregulated	14	2.773	0.0625	downregulated	7	0.133347	0.8752	upregulated	13	1.22727	0.2931
regulation of NMDA receptor activity	GO	5 out of 8	9.03287	upregulated	2	4.1564	0.0157					upregulated	1	1.30077	0.2723									downregulated	2	1.32588	0.2656	downregulated	3	1.60394	0.2011	downregulated	1	0.645876	0.5242
multivesicular body organization	GO	6 out of 8	9.03059	upregulated	2	1.4617	0.2318	upregulated	3	2.65823	0.0701	upregulated	1	0.841993	0.4309	downregulated	1	0.562108	0.57	downregulated	3	3.25203	0.0387	downregulated	3	1.81796	0.1624	downregulated	1	0.930958	0.3942	upregulated	4	1.37018	0.2541
cardiocyte differentiation	GO	6 out of 8	8.96355	upregulated	8	5.86288	0.0028	upregulated	3	0.472611	0.6234	downregulated	6	4.8809	0.0076	downregulated	3	2.79866	0.0609	downregulated	5	2.39017	0.0916	downregulated	5	2.2896	0.1013	downregulated	5	2.73978	0.0646	downregulated	7	2.88807	0.0557
energy reserve metabolic process	GO	4 out of 8	8.91678	upregulated	2	2.76	0.0633	downregulated	1	0.404286	0.6675	upregulated	2	1.60326	0.2012	downregulated	4	1.97295	0.139	downregulated	2	2.42997	0.088	downregulated	5	3.63999	0.0263	downregulated	5	1.71973	0.1791	downregulated	4	1.1271	0.324
photoreceptor cell cilium	GO	6 out of 8	8.9121	upregulated	5	2.26633	0.1037	upregulated	4	1.12749	0.3238	downregulated	4	0.944994	0.3887	downregulated	1	0.25262	0.7768	downregulated	4	2.32716	0.0976	downregulated	5	2.12185	0.1198	downregulated	5	1.59644	0.2026	downregulated	4	0.670447	0.5115
chaperone-mediated protein transport	GO	5 out of 8	8.8499	upregulated	1	0.912338	0.4016	upregulated	1	1.12365	0.3251													downregulated	1	1.37955	0.2517	downregulated	1	1.75714	0.1725	downregulated	1	3.67723	0.0253
9+0 non-motile cilium	GO	6 out of 8	8.83359	upregulated	5	2.24536	0.1059	upregulated	4	1.11977	0.3264	downregulated	4	0.930417	0.3944	downregulated	1	0.248565	0.7799	downregulated	4	2.30316	0.0999	downregulated	5	2.10441	0.1219	downregulated	5	1.58049	0.2059	downregulated	4	0.65937	0.5172
oxidoreductase activity, acting on the aldehyde or oxo group of donors, NAD or NADP as acceptor	GO	7 out of 8	8.82704	upregulated	1	0.595596	0.5512	upregulated	1	0.650907	0.5216	upregulated	1	0.9022	0.4057					downregulated	1	2.04605	0.1292	downregulated	2	1.59212	0.2035	downregulated	2	1.23369	0.2912	downregulated	2	1.80647	0.1642
signal sequence binding	GO	4 out of 8	8.81073	upregulated	3	0.643358	0.5255	downregulated	1	0.520566	0.5942	upregulated	3	3.33685	0.0355	downregulated	1	0.189167	0.8276	downregulated	1	1.92658	0.1456	downregulated	1	1.78287	0.1682	downregulated	1	2.59791	0.0744	downregulated	4	2.50338	0.0818
response to epinephrine	GO	5 out of 8	8.75099	upregulated	1	1.13216	0.3223	downregulated	1	4.71073	0.009	downregulated	1	1.07359	0.3418					downregulated	2	4.0624	0.0172	downregulated	2	3.37124	0.0343	downregulated	2	3.78583	0.0227	downregulated	1	2.18369	0.1126
positive regulation of ERAD pathway	GO	5 out of 8	8.74739	upregulated	2	2.95991	0.0518	upregulated	2	3.37498	0.0342	downregulated	1	0.403955	0.6677	downregulated	1	1.07434	0.3415	downregulated	1	1.56257	0.2096	downregulated	2	1.24694	0.2874	downregulated	1	1.08129	0.3392
drug transmembrane transporter activity	GO	5 out of 8	8.74677	upregulated	4	1.82439	0.1613	upregulated	2	2.89922	0.0551	upregulated	3	5.72758	0.0033	downregulated	2	1.57574	0.2069	upregulated	1	2.55396	0.0778	upregulated	6	2.92088	0.0539	downregulated	8	2.16923	0.1143	downregulated	5	3.17694	0.0417
nucleotide-sugar metabolic process	GO	6 out of 8	8.74619	upregulated	3	1.62747	0.1964	upregulated	3	4.10813	0.0164	upregulated	2	2.339	0.0964									downregulated	1	0.293033	0.746	downregulated	1	0.184746	0.8313	downregulated	1	0.193812	0.8238
negative regulation of cellular component movement	GO	6 out of 8	8.71851	upregulated	17	5.38983	0.0046	upregulated	10	4.2279	0.0146	downregulated	33	7.37388	0.0006	downregulated	15	5.59354	0.0037	downregulated	12	3.98266	0.0186	downregulated	17	4.10904	0.0164	downregulated	19	3.02687	0.0485	downregulated	21	0.949631	0.3869
proton-transporting ATP synthase complex	GO	5 out of 8	8.71643	upregulated	1	1.95504	0.1416	upregulated	1	2.96451	0.0516	upregulated	1	2.90512	0.0547									downregulated	1	0.718968	0.4873	downregulated	1	0.652695	0.5206	upregulated	1	0.479905	0.6188
spermatid differentiation	GO	6 out of 8	8.66959	upregulated	9	2.53056	0.0796	upregulated	6	1.76991	0.1703	upregulated	6	3.18245	0.0415	upregulated	4	2.90067	0.055	upregulated	2	1.86429	0.155	downregulated	6	1.12692	0.324	upregulated	16	1.8331	0.1599	downregulated	10	0.856469	0.4247
meiotic chromosome segregation	GO	6 out of 8	8.65723	upregulated	3	0.532562	0.5871	upregulated	8	6.35258	0.0017	upregulated	2	1.39589	0.2476	upregulated	1	0.773667	0.4613	downregulated	1	0.199605	0.8191	upregulated	2	0.140165	0.8692	downregulated	5	0.569288	0.5659	upregulated	3	1.0262	0.3584
cellular response to amyloid-beta	GO	4 out of 8	8.65332	downregulated	1	1.62249	0.1974	upregulated	1	3.25023	0.0388	upregulated	2	2.2561	0.1048	downregulated	1	0.851704	0.4267	downregulated	3	4.78712	0.0083	downregulated	4	6.04016	0.0024	upregulated	3	4.56339	0.0104	downregulated	1	1.61339	0.1992
intercellular bridge	GO	5 out of 8	8.65004	upregulated	5	4.64193	0.0096	upregulated	3	3.66358	0.0256	downregulated	4	0.897706	0.4075	upregulated	1	1.69003	0.1845					downregulated	1	0.115533	0.8909	downregulated	2	0.136292	0.8726	upregulated	3	0.699619	0.4968
ribonucleoprotein complex assembly	GO	5 out of 8	8.61396	upregulated	8	1.1339	0.3218	upregulated	14	3.97372	0.0188	upregulated	9	2.18066	0.113	upregulated	2	0.581011	0.5593	upregulated	2	0.286798	0.7507	downregulated	8	1.03147	0.3565	downregulated	5	1.24952	0.2866	upregulated	25	1.14331	0.3188
retinal binding	GO	4 out of 8	8.59567	upregulated	1	2.40486	0.0903					upregulated	1	1.71244	0.1804	upregulated	1	2.34984	0.0954													downregulated	2	2.12853	0.119
negative regulation of viral release from host cell	GO	5 out of 8	8.56238	upregulated	2	1.68551	0.1854	upregulated	1	0.747067	0.4738									downregulated	1	1.75929	0.1722	downregulated	2	1.80525	0.1644	downregulated	3	3.93556	0.0195	upregulated	1	1.3703	0.254
regulation of IRE1-mediated unfolded protein response	GO	4 out of 8	8.54336									upregulated	2	3.54792	0.0288					downregulated	1	1.1917	0.3037	downregulated	1	1.26562	0.2821	downregulated	1	1.63813	0.1943	downregulated	1	2.53812	0.079
DNA biosynthetic process	GO	3 out of 8	8.52231	upregulated	5	0.7355	0.4793	upregulated	10	9.8024	5.5e-05	downregulated	4	0.131745	0.8766	downregulated	4	1.42514	0.2405					upregulated	4	0.156976	0.8547	upregulated	10	0.560884	0.5707	downregulated	5	0.259161	0.7717
phospholipid transporter activity	GO	4 out of 8	8.51085	downregulated	2	0.814728	0.4428	upregulated	2	1.953	0.1418	downregulated	4	3.26461	0.0382	downregulated	4	3.23379	0.0394	downregulated	4	3.30469	0.0367	downregulated	7	1.72098	0.1789	downregulated	7	2.51301	0.081	downregulated	5	0.972164	0.3783
negative regulation of sodium ion transmembrane transporter activity	GO	3 out of 8	8.493					downregulated	1	3.41185	0.033									downregulated	1	3.35289	0.035	downregulated	4	6.12159	0.0022	downregulated	3	4.9182	0.0073	upregulated	2	2.48783	0.0831
establishment of protein localization to mitochondrion	GO	5 out of 8	8.45882	upregulated	6	1.99799	0.1356					upregulated	3	2.1654	0.1147					downregulated	2	1.05738	0.3474	downregulated	9	3.66179	0.0257	downregulated	2	0.294795	0.7447	upregulated	6	0.71854	0.4875
plasma membrane tubulation	GO	4 out of 8	8.45503	downregulated	2	5.11126	0.006					downregulated	3	3.46656	0.0312					downregulated	2	2.98754	0.0504	downregulated	2	4.52001	0.0109	downregulated	2	4.54542	0.0106	downregulated	2	4.97987	0.0069
lymphangiogenesis	GO	3 out of 8	8.42884	downregulated	1	2.55509	0.0777	upregulated	1	1.54732	0.2128	upregulated	1	1.67379	0.1875					downregulated	2	2.8042	0.0606	downregulated	2	3.53983	0.029	downregulated	2	3.33916	0.0355	downregulated	1	2.28549	0.1017
response to potassium ion	GO	3 out of 8	8.41199																					downregulated	2	2.78093	0.062	downregulated	2	2.37808	0.0927	downregulated	3	3.25298	0.0387
establishment of protein localization to peroxisome	GO	3 out of 8	8.35909	upregulated	2	0.341624	0.7106	upregulated	7	6.44734	0.0016	upregulated	4	5.78712	0.0031	downregulated	2	1.33984	0.2619					upregulated	5	1.667	0.1888	upregulated	5	0.905378	0.4044	upregulated	4	0.304769	0.7373
regulation of cellular response to drug	GO	4 out of 8	8.33372	downregulated	2	1.58603	0.2047	upregulated	2	4.4119	0.0121	downregulated	4	4.01536	0.018	downregulated	1	1.88058	0.1525	downregulated	3	4.22874	0.0146	downregulated	4	3.20587	0.0405	downregulated	5	3.96917	0.0189	downregulated	1	2.31355	0.0989
regulation of cellular response to heat	GO	5 out of 8	8.29342	upregulated	5	6.49103	0.0015	upregulated	1	0.630979	0.5321	downregulated	3	2.41414	0.0894	downregulated	3	3.68687	0.0251	downregulated	3	2.26443	0.1039	downregulated	4	3.62621	0.0266	downregulated	3	1.85689	0.1562	upregulated	1	0.475095	0.6218
positive regulation of urine volume	GO	3 out of 8	8.2735					upregulated	1	4.09752	0.0166	upregulated	1	1.29928	0.2727	upregulated	1	2.8767	0.0563
semi-lunar valve development	GO	5 out of 8	8.26785	upregulated	3	2.98276	0.0507	upregulated	1	0.913092	0.4013	downregulated	2	1.35903	0.2569	downregulated	4	4.98763	0.0068	downregulated	3	5.29907	0.005	downregulated	3	4.12848	0.0161	downregulated	3	2.88331	0.0559	upregulated	1	1.5922	0.2035
positive regulation of potassium ion transmembrane transport	GO	4 out of 8	8.2565									downregulated	2	1.56384	0.2093	downregulated	1	0.600513	0.5485	downregulated	1	3.10856	0.0447	downregulated	3	2.62397	0.0725	downregulated	4	2.55759	0.0775	downregulated	4	2.13074	0.1187
chromatin assembly	GO	3 out of 8	8.17184	upregulated	9	3.61304	0.027	upregulated	12	10.3789	3.1e-05	downregulated	7	1.06644	0.3442	downregulated	5	1.70087	0.1825	upregulated	1	1.05595	0.3479	downregulated	2	0.548515	0.5778	upregulated	9	1.17375	0.3092	upregulated	9	1.37164	0.2537
NADH dehydrogenase activity	GO	4 out of 8	8.14351	upregulated	2	0.968021	0.3798	downregulated	1	1.71013	0.1808									downregulated	2	1.41732	0.2424	downregulated	5	3.2598	0.0384	downregulated	3	0.790841	0.4535	downregulated	1	2.67554	0.0689
negative regulation of sodium ion transmembrane transport	GO	3 out of 8	8.13785					downregulated	1	3.37961	0.0341									downregulated	1	3.32068	0.0361	downregulated	4	5.97146	0.0026	downregulated	3	4.68177	0.0093	upregulated	2	2.45645	0.0857
negative regulation of oxidative stress-induced intrinsic apoptotic signaling pathway	GO	5 out of 8	8.13726	upregulated	3	3.47557	0.0309					upregulated	1	1.09659	0.334					downregulated	1	1.77049	0.1702	downregulated	1	1.14646	0.3178	downregulated	1	1.01073	0.364	upregulated	1	0.362578	0.6959
growth factor activity	GO	6 out of 8	8.1216	upregulated	6	2.34758	0.0956	upregulated	9	5.39446	0.0045	upregulated	4	1.39348	0.2482	downregulated	4	2.13071	0.1188	downregulated	3	0.877371	0.4159	upregulated	3	1.63188	0.1956	downregulated	4	1.13944	0.32	downregulated	7	0.731862	0.481
peroxisome organization	GO	3 out of 8	8.10929	upregulated	3	0.492259	0.6112	upregulated	7	5.69656	0.0034	upregulated	4	5.49331	0.0041	downregulated	2	1.21297	0.2973					upregulated	6	1.47604	0.2285	upregulated	6	0.697392	0.4979	upregulated	4	0.186437	0.8299
negative regulation of signaling receptor activity	GO	6 out of 8	8.10435	downregulated	3	2.09069	0.1236					upregulated	4	4.17392	0.0154	upregulated	2	4.36191	0.0128	downregulated	1	0.414774	0.6605	downregulated	4	0.439271	0.6445	downregulated	3	0.276936	0.7581	downregulated	2	0.528234	0.5896
negative regulation of TORC1 signaling	GO	6 out of 8	8.07307	upregulated	2	4.08622	0.0168	upregulated	1	1.89863	0.1498	downregulated	1	1.86731	0.1545	downregulated	2	3.17134	0.0419	downregulated	1	2.26799	0.1035	downregulated	1	1.61063	0.1998	downregulated	2	1.53478	0.2155	downregulated	2	1.71347	0.1802
protein kinase regulator activity	GO	6 out of 8	8.06159	upregulated	9	0.976568	0.3766	upregulated	6	2.23845	0.1066	upregulated	9	4.33181	0.0131	downregulated	7	3.81868	0.022	downregulated	7	4.18894	0.0152	downregulated	10	2.56829	0.0767	downregulated	13	0.755992	0.4695	downregulated	14	1.15203	0.316
digestive system process	GO	5 out of 8	7.95014	upregulated	1	0.90384	0.405	upregulated	2	2.46685	0.0849	upregulated	2	1.65132	0.1918	downregulated	3	3.07524	0.0462	downregulated	2	2.16708	0.1145	downregulated	2	3.2804	0.0376	upregulated	3	4.09441	0.0167	downregulated	7	5.55414	0.0039
filamentous actin	GO	6 out of 8	7.92307	upregulated	1	1.39345	0.2482	upregulated	2	1.90862	0.1483	upregulated	1	1.75386	0.1731	upregulated	1	1.37801	0.2521					downregulated	1	0.81797	0.4413	upregulated	1	0.239608	0.7869	downregulated	1	0.91077	0.4022
positive regulation of NIK/NF-kappaB signaling	GO	6 out of 8	7.92119	upregulated	4	2.14307	0.1173	upregulated	3	5.57742	0.0038	downregulated	8	4.25528	0.0142	downregulated	8	7.44915	0.0006	downregulated	2	2.20642	0.1101	downregulated	2	2.57884	0.0759	downregulated	3	2.53797	0.079	downregulated	5	4.5819	0.0102
monosaccharide transmembrane transport	GO	6 out of 8	7.91055	upregulated	1	2.21947	0.1087	downregulated	1	1.86069	0.1556	upregulated	1	1.41708	0.2424	downregulated	2	3.11637	0.0443	downregulated	1	1.04135	0.353	downregulated	3	1.96379	0.1403	downregulated	3	1.84547	0.158	downregulated	6	4.40044	0.0123
establishment of protein localization to plasma membrane	GO	4 out of 8	7.84509	upregulated	4	1.65083	0.1919	downregulated	3	3.11349	0.0444	upregulated	1	1.70975	0.1809	downregulated	2	1.76632	0.171	upregulated	3	4.60855	0.01	downregulated	6	4.65483	0.0095	downregulated	4	3.48992	0.0305	downregulated	2	4.70949	0.009
cell death in response to oxidative stress	GO	5 out of 8	7.83254	downregulated	1	0.950045	0.3867	downregulated	1	1.88072	0.1525	upregulated	1	0.969023	0.3795					downregulated	2	2.07893	0.1251	downregulated	2	2.65714	0.0701	downregulated	2	3.07457	0.0462	downregulated	2	1.88365	0.152
positive regulation of proteolysis involved in cellular protein catabolic process	GO	5 out of 8	7.78439	upregulated	8	1.87332	0.1536	upregulated	7	2.80364	0.0606	downregulated	12	4.625	0.0098	downregulated	7	1.60146	0.2016	downregulated	6	2.4408	0.0871	downregulated	12	4.9067	0.0074	downregulated	9	3.90129	0.0202	upregulated	8	1.91489	0.1474
regulation of microtubule polymerization or depolymerization	GO	5 out of 8	7.77218	upregulated	6	3.4315	0.0323	upregulated	3	0.919243	0.3988	downregulated	8	1.85669	0.1562	downregulated	3	0.745353	0.4746	upregulated	1	1.35342	0.2584	downregulated	8	3.0744	0.0462	downregulated	5	1.60363	0.2012	downregulated	5	2.69888	0.0673
regulation of lymphocyte chemotaxis	GO	5 out of 8	7.74761									upregulated	1	2.43634	0.0875	upregulated	1	2.04309	0.1296					downregulated	1	1.26357	0.2826	downregulated	1	1.58742	0.2045	downregulated	1	0.417192	0.6589
regulation of tumor necrosis factor secretion	GO	4 out of 8	7.71657	downregulated	1	1.34016	0.2618					downregulated	3	4.44248	0.0118	downregulated	2	3.77218	0.023	downregulated	2	3.53163	0.0293	downregulated	2	3.91784	0.0199	downregulated	2	3.8757	0.0207	downregulated	2	5.94623	0.0026
endocrine process	GO	6 out of 8	7.67875	downregulated	3	2.37644	0.0929	upregulated	2	1.07841	0.3401	upregulated	3	2.19456	0.1114	upregulated	3	4.98277	0.0069	upregulated	1	0.522423	0.5931	downregulated	3	0.839955	0.4317	downregulated	2	1.0118	0.3636	downregulated	1	0.470117	0.6249
regulation of protein targeting	GO	5 out of 8	7.67468	upregulated	7	4.22215	0.0147	downregulated	2	2.04984	0.1288	downregulated	5	2.16401	0.1149	downregulated	4	3.13056	0.0437	downregulated	5	2.59913	0.0743	downregulated	8	4.48634	0.0113	downregulated	6	1.29345	0.2743	downregulated	6	2.41801	0.0891
pre-mRNA binding	GO	5 out of 8	7.64936	upregulated	2	1.17907	0.3076	downregulated	1	3.67269	0.0254	downregulated	6	3.69972	0.0247	downregulated	2	2.74772	0.0641	downregulated	4	3.7423	0.0237	downregulated	5	4.05596	0.0173	downregulated	4	4.28656	0.0138	downregulated	5	4.5056	0.011
Seh1-associated complex	GO	5 out of 8	7.64772	upregulated	1	2.05909	0.1276									downregulated	1	0.842295	0.4307	downregulated	1	2.07265	0.1259	downregulated	1	1.38312	0.2508	downregulated	2	1.39993	0.2466	downregulated	2	1.57524	0.207
tetrahydrofolate interconversion	GO	2 out of 8	7.59121					upregulated	1	6.40112	0.0017	downregulated	2	1.18189	0.3067									upregulated	1	0.364658	0.6944	downregulated	1	1.07469	0.3414	downregulated	2	2.73664	0.0648
hormone biosynthetic process	GO	6 out of 8	7.58876	upregulated	1	1.20094	0.3009	upregulated	2	1.84611	0.1578	upregulated	2	2.15036	0.1164	downregulated	4	2.27721	0.1026	downregulated	1	0.895025	0.4086	downregulated	3	0.723496	0.4851	downregulated	2	0.802088	0.4484	upregulated	1	0.0292673	0.9712
grooming behavior	GO	3 out of 8	7.58041	upregulated	1	2.70349	0.067					upregulated	1	1.86574	0.1548	upregulated	1	3.01118	0.0492
regulation of defense response to bacterium	GO	4 out of 8	7.57556									upregulated	1	4.7634	0.0085	downregulated	1	3.6731	0.0254	downregulated	1	2.83182	0.0589	downregulated	1	2.62549	0.0724	downregulated	1	2.7378	0.0647	downregulated	1	3.05356	0.0472
retinol binding	GO	4 out of 8	7.56221	upregulated	1	2.54825	0.0782					upregulated	1	1.77097	0.1702	upregulated	1	2.41131	0.0897													downregulated	1	0.831673	0.4353
regulation of glial cell migration	GO	2 out of 8	7.54861					upregulated	2	10.6044	2.5e-05	downregulated	1	1.97628	0.1386	downregulated	1	1.99493	0.136					downregulated	1	0.915463	0.4003
regulation of body fluid levels	GO	4 out of 8	7.54706	downregulated	9	1.37075	0.2539	upregulated	19	9.45493	7.8e-05	downregulated	33	3.4715	0.0311	downregulated	23	4.18702	0.0152	downregulated	16	2.78737	0.0616	downregulated	26	2.77858	0.0621	downregulated	20	3.52123	0.0296	upregulated	22	1.96578	0.14
establishment or maintenance of epithelial cell apical/basal polarity	GO	4 out of 8	7.53755	upregulated	2	0.881423	0.4142	downregulated	2	3.847	0.0213	downregulated	2	0.88395	0.4131	upregulated	1	3.03599	0.048	downregulated	2	3.59099	0.0276	downregulated	4	3.12991	0.0437	downregulated	4	3.00368	0.0496	downregulated	3	4.7601	0.0086
single fertilization	GO	6 out of 8	7.49913	upregulated	3	1.06448	0.3449					upregulated	5	2.96842	0.0514	upregulated	3	2.91258	0.0543					downregulated	3	0.106419	0.899	downregulated	5	0.241429	0.7855	downregulated	6	0.2058	0.814
sequence-specific mRNA binding	GO	5 out of 8	7.48585	upregulated	1	1.57342	0.2073	upregulated	2	6.30588	0.0018	upregulated	1	1.45424	0.2336	downregulated	1	1.351	0.259	downregulated	1	0.952429	0.3858	downregulated	1	0.623041	0.5363					upregulated	2	2.07215	0.1259
positive regulation of glucose import in response to insulin stimulus	GO	4 out of 8	7.46939	upregulated	4	7.22134	0.0007	downregulated	1	1.11492	0.3279	upregulated	1	0.826625	0.4375					downregulated	2	1.78089	0.1685	downregulated	2	2.53144	0.0795	upregulated	3	1.36197	0.2562	upregulated	1	2.41402	0.0895
mitochondrial electron transport, NADH to ubiquinone	GO	4 out of 8	7.44153	upregulated	2	1.00306	0.3668	downregulated	1	1.73564	0.1763									downregulated	2	1.41732	0.2424	downregulated	4	2.15732	0.1156	downregulated	3	1.19135	0.3038	downregulated	2	2.67554	0.0689
fertilization	GO	7 out of 8	7.42158	upregulated	4	0.858719	0.4237					upregulated	5	2.48278	0.0835	upregulated	3	2.45492	0.0859	downregulated	1	0.316701	0.7285	downregulated	6	0.177519	0.8373	downregulated	7	0.232373	0.7927	downregulated	9	0.898571	0.4072
regulation of cell-cell adhesion mediated by cadherin	GO	5 out of 8	7.39965	upregulated	1	3.11204	0.0445					downregulated	2	2.34742	0.0956					downregulated	1	1.35048	0.2591	downregulated	1	2.07586	0.1254	downregulated	1	2.0157	0.1332	downregulated	1	1.19298	0.3033
regulation of intracellular transport	GO	5 out of 8	7.3878	upregulated	21	3.384	0.0339	downregulated	4	1.95655	0.1413	downregulated	28	3.47368	0.031	downregulated	23	5.25475	0.0052	downregulated	18	3.21445	0.0402	downregulated	33	4.78849	0.0083	downregulated	29	4.32631	0.0132	downregulated	27	2.35953	0.0945
regulation of urine volume	GO	3 out of 8	7.37021					upregulated	1	3.69611	0.0248	upregulated	1	1.06783	0.3438	upregulated	1	2.60627	0.0738
carbon-nitrogen lyase activity	GO	4 out of 8	7.33381	upregulated	2	3.02976	0.0483	upregulated	1	2.84757	0.058	downregulated	1	0.543173	0.5809													downregulated	1	0.869935	0.419	downregulated	1	1.12972	0.3231
iron ion import	GO	6 out of 8	7.30612	upregulated	1	0.880479	0.4146					upregulated	2	1.73742	0.176	upregulated	1	2.96918	0.0513	downregulated	1	0.633112	0.5309	downregulated	1	0.842284	0.4307	downregulated	1	0.510069	0.6005	upregulated	2	0.266429	0.7661
neutral lipid metabolic process	GO	6 out of 8	7.27266	downregulated	2	4.97486	0.0069	upregulated	4	2.64967	0.0707	upregulated	7	6.78609	0.0011	downregulated	4	3.25537	0.0386	downregulated	3	0.678124	0.5076	downregulated	7	1.37972	0.2516	downregulated	7	1.88738	0.1515	downregulated	7	2.12191	0.1198
digestion	GO	5 out of 8	7.26467	downregulated	2	0.746899	0.4738	upregulated	3	2.95436	0.0521	upregulated	3	2.17601	0.1135	downregulated	5	3.70627	0.0246	downregulated	2	1.7634	0.1715	downregulated	2	2.8284	0.0591	upregulated	3	3.81395	0.0221	downregulated	7	5.06271	0.0063
transcriptional activator activity, RNA polymerase II distal enhancer sequence-specific DNA binding	GO	5 out of 8	7.24038	upregulated	2	4.32718	0.0132					downregulated	3	1.80602	0.1643	downregulated	3	2.44945	0.0863	downregulated	2	3.44639	0.0319	downregulated	3	1.98925	0.1368	downregulated	2	1.08793	0.3369	downregulated	2	0.645108	0.5246
calcium-dependent protein binding	GO	4 out of 8	7.24028	downregulated	1	0.709599	0.4918	downregulated	1	0.520566	0.5942	downregulated	5	2.80547	0.0605	downregulated	3	1.88824	0.1513	downregulated	2	2.64509	0.071	downregulated	3	3.58831	0.0276	downregulated	3	3.80209	0.0223	downregulated	2	3.12866	0.0438
response to nerve growth factor	GO	5 out of 8	7.19609	upregulated	1	0.221957	0.8009	upregulated	4	3.33784	0.0355	upregulated	3	2.73907	0.0646	upregulated	2	3.26968	0.038	upregulated	1	0.503496	0.6044	upregulated	7	2.2425	0.1062	upregulated	8	2.35599	0.0948	downregulated	5	2.72953	0.0653
adult locomotory behavior	GO	4 out of 8	7.16231	upregulated	5	3.12261	0.044					downregulated	6	3.74951	0.0235	downregulated	7	7.54461	0.0005	downregulated	6	4.4288	0.0119	downregulated	10	6.45979	0.0016	downregulated	7	4.58213	0.0102	downregulated	7	2.98572	0.0505
regulation of circadian sleep/wake cycle	GO	6 out of 8	7.1567	upregulated	1	1.05776	0.3472	upregulated	1	0.996537	0.3692	downregulated	1	1.05919	0.3467	downregulated	1	1.29004	0.2753	downregulated	1	1.0122	0.3634	downregulated	2	1.47343	0.2291	downregulated	3	2.96096	0.0518	downregulated	2	2.00503	0.1347
ciliary basal body-plasma membrane docking	GO	4 out of 8	7.1477	upregulated	12	7.3842	0.0006	upregulated	8	6.94068	0.001	downregulated	11	3.82358	0.0218	downregulated	4	2.34038	0.0963	upregulated	1	1.16513	0.3119	downregulated	3	0.284017	0.7528	upregulated	11	0.456677	0.6334	downregulated	4	0.324573	0.7228
positive regulation of oxidative stress-induced cell death	GO	3 out of 8	7.1439	downregulated	2	2.97084	0.0513	upregulated	1	3.90022	0.0202	downregulated	1	0.217841	0.8043					downregulated	1	2.6933	0.0677	downregulated	2	3.11392	0.0444	downregulated	1	2.59974	0.0743	downregulated	3	3.73906	0.0238
regulation of NIK/NF-kappaB signaling	GO	6 out of 8	7.12451	upregulated	4	1.66439	0.1893	upregulated	5	4.83869	0.0079	downregulated	10	3.57049	0.0281	downregulated	9	6.234	0.002	downregulated	2	1.8468	0.1577	downregulated	2	2.21068	0.1096	downregulated	3	2.17059	0.1141	downregulated	5	4.19785	0.015
ruffle	GO	3 out of 8	7.11142	downregulated	7	3.93141	0.0196	downregulated	3	0.529738	0.5888	downregulated	23	5.80758	0.003	downregulated	15	6.57384	0.0014	upregulated	3	1.58971	0.204	downregulated	11	2.67638	0.0688	downregulated	15	2.46169	0.0853	downregulated	15	3.56306	0.0284
muscle filament sliding	GO	6 out of 8	7.11134	upregulated	2	1.47092	0.2297	downregulated	1	1.35795	0.2572	upregulated	1	0.896398	0.408	upregulated	2	4.87696	0.0076					downregulated	1	0.502967	0.6047	downregulated	2	0.630372	0.5324	downregulated	1	0.0916751	0.9124
positive regulation of cardiac muscle cell differentiation	GO	5 out of 8	7.09796	upregulated	2	4.21007	0.0148					downregulated	2	3.98046	0.0187	downregulated	2	3.12591	0.0439	downregulated	1	2.51784	0.0806	downregulated	1	2.31421	0.0988	downregulated	1	2.42497	0.0885	downregulated	1	2.73725	0.0647
rhythmic process	GO	4 out of 8	7.08932	upregulated	20	4.60869	0.01	upregulated	12	4.25218	0.0142	upregulated	10	3.30183	0.0368	upregulated	6	5.2669	0.0052	upregulated	5	1.28948	0.2754	upregulated	16	2.24203	0.1062	upregulated	26	1.68907	0.1847	upregulated	28	5.1197	0.006
positive regulation of tumor necrosis factor secretion	GO	4 out of 8	6.9908	downregulated	1	1.75978	0.1721					downregulated	3	5.94428	0.0026	downregulated	2	4.50518	0.0111	downregulated	2	4.01162	0.0181	downregulated	2	4.39966	0.0123	downregulated	2	4.35736	0.0128	downregulated	2	6.4314	0.0016
response to light stimulus	GO	5 out of 8	6.98347	upregulated	9	0.64831	0.5229	upregulated	17	6.65788	0.0013	upregulated	7	4.64612	0.0096	downregulated	14	2.96401	0.0516	downregulated	6	0.747323	0.4736	downregulated	11	0.274443	0.76	upregulated	25	0.278476	0.7569	upregulated	28	2.74811	0.064
actin filament bundle organization	GO	5 out of 8	6.97324	downregulated	1	1.45111	0.2343	upregulated	5	4.44805	0.0117	upregulated	2	0.951353	0.3862	upregulated	3	2.95589	0.052	downregulated	3	1.82577	0.1611	downregulated	4	1.69808	0.183	downregulated	3	1.90606	0.1487	upregulated	6	3.4548	0.0316
cytokine production	GO	3 out of 8	6.96071	downregulated	2	0.179658	0.8356	upregulated	6	2.12885	0.119	downregulated	15	9.3204	9e-05	downregulated	9	5.20719	0.0055	downregulated	3	2.69409	0.0676	downregulated	4	2.43637	0.0875	upregulated	9	3.19649	0.0409	downregulated	6	1.83025	0.1604
peptide biosynthetic process	GO	7 out of 8	6.92971	upregulated	15	0.191373	0.8258	upregulated	18	4.95421	0.0071	upregulated	14	1.57218	0.2076	upregulated	5	1.38466	0.2504	downregulated	9	0.268157	0.7648	downregulated	27	0.72496	0.4843	downregulated	17	0.051061	0.9502	upregulated	41	2.21689	0.1089
regulation of protein catabolic process	GO	4 out of 8	6.90538	upregulated	23	1.76264	0.1716	upregulated	20	3.89683	0.0203	downregulated	23	2.14669	0.1169	downregulated	17	1.18216	0.3066	downregulated	15	3.05682	0.047	downregulated	31	4.0825	0.0169	upregulated	35	1.50854	0.2212	upregulated	32	1.05601	0.3478
tricarboxylic acid cycle enzyme complex	GO	5 out of 8	6.88491	upregulated	1	0.892299	0.4097	upregulated	1	2.25153	0.1052													downregulated	2	1.71647	0.1797	downregulated	1	0.962723	0.3819	downregulated	1	1.0619	0.3458
negative regulation of cardiocyte differentiation	GO	3 out of 8	6.84535	upregulated	1	1.54306	0.2137					downregulated	1	1.36225	0.2561	downregulated	1	0.712673	0.4903	upregulated	2	2.85857	0.0574	downregulated	3	5.18364	0.0056	upregulated	4	3.71628	0.0243	downregulated	4	5.90985	0.0027
phosphatidylserine acyl-chain remodeling	GO	4 out of 8	6.80828					downregulated	1	1.27827	0.2785	downregulated	1	1.36095	0.2564					downregulated	2	2.44339	0.0869	downregulated	2	2.06247	0.1271	downregulated	2	2.88612	0.0558	downregulated	2	2.05553	0.128
positive regulation of cell growth	GO	4 out of 8	6.80059	downregulated	4	1.79004	0.167	downregulated	4	3.32745	0.0359	downregulated	9	4.88216	0.0076	downregulated	12	5.24504	0.0053	downregulated	10	4.48793	0.0112	downregulated	15	5.95866	0.0026	downregulated	16	5.74385	0.0032	downregulated	15	5.85483	0.0029
trans-Golgi network	GO	3 out of 8	6.79586	upregulated	9	4.59267	0.0101	upregulated	8	1.51281	0.2203	downregulated	29	18.5294	9e-09	downregulated	19	15.1259	2.7e-07	upregulated	7	6.45962	0.0016	downregulated	21	4.28118	0.0138	downregulated	19	2.76675	0.0629	downregulated	21	6.20755	0.002
translation initiation factor activity	GO	4 out of 8	6.7852	upregulated	2	0.27883	0.7567	upregulated	1	0.234622	0.7909	upregulated	1	0.458458	0.6323	downregulated	2	1.3408	0.2616	downregulated	3	3.03989	0.0478	downregulated	4	2.04326	0.1296	downregulated	3	0.506344	0.6027	downregulated	2	1.1957	0.3025
cell communication by electrical coupling involved in cardiac conduction	GO	4 out of 8	6.77636					downregulated	1	4.775	0.0084					downregulated	1	2.44233	0.087	downregulated	1	0.838481	0.4324	downregulated	2	2.53779	0.079	downregulated	4	6.26764	0.0019	downregulated	3	4.34978	0.0129
SH3 domain binding	GO	4 out of 8	6.76904	downregulated	7	5.09353	0.0061	downregulated	2	0.326291	0.7216	downregulated	16	9.53252	7.2e-05	downregulated	8	4.70227	0.0091	downregulated	10	5.92471	0.0027	downregulated	13	5.54139	0.0039	downregulated	19	9.8458	5.3e-05	downregulated	13	5.11174	0.006
alcohol catabolic process	GO	7 out of 8	6.74666	upregulated	1	0.362506	0.6959	upregulated	2	1.96052	0.1408	downregulated	2	0.834998	0.4339	upregulated	1	2.34328	0.096	downregulated	1	0.66907	0.5122	downregulated	3	0.5821	0.5587	downregulated	5	1.24164	0.2889	downregulated	2	0.422536	0.6554
pallium development	GO	5 out of 8	6.70911	downregulated	2	0.500002	0.6065	upregulated	7	5.35066	0.0047	downregulated	11	3.54847	0.0288	downregulated	8	3.04886	0.0474	downregulated	6	2.15978	0.1154	downregulated	11	1.98845	0.1369	downregulated	12	1.89853	0.1498	downregulated	9	2.40902	0.0899
GATOR2 complex	GO	4 out of 8	6.7075													downregulated	1	1.05818	0.3471	downregulated	1	2.42682	0.0883	downregulated	1	1.83273	0.16	downregulated	2	1.66235	0.1897	downregulated	2	1.84377	0.1582
cell redox homeostasis	GO	6 out of 8	6.70691	downregulated	1	0.496337	0.6088	upregulated	2	1.16849	0.3108	upregulated	1	0.209995	0.8106					downregulated	1	0.341716	0.7106	downregulated	4	1.64631	0.1928	downregulated	4	1.29889	0.2728	downregulated	5	2.53785	0.079
negative regulation of hydrogen peroxide-induced cell death	GO	5 out of 8	6.69665	upregulated	2	1.90144	0.1494	upregulated	2	5.27725	0.0051	downregulated	3	4.87157	0.0077	downregulated	1	2.62727	0.0723	downregulated	2	2.51215	0.0811	downregulated	3	2.0196	0.1327	downregulated	4	2.80717	0.0604	upregulated	1	0.32212	0.7246
leukocyte adhesion to vascular endothelial cell	GO	5 out of 8	6.6692					upregulated	1	3.97472	0.0188	upregulated	1	1.35434	0.2581	downregulated	1	2.31507	0.0988					downregulated	2	1.12808	0.3237	downregulated	2	1.50029	0.2231	downregulated	2	1.02684	0.3581
acylglycerol metabolic process	GO	6 out of 8	6.65367	downregulated	2	5.00162	0.0067	upregulated	4	2.68322	0.0683	upregulated	7	6.85427	0.0011	downregulated	4	3.2913	0.0372	downregulated	2	0.301821	0.7395	downregulated	6	1.01213	0.3634	downregulated	7	1.93132	0.145	downregulated	7	2.16382	0.1149
deacetylase activity	GO	4 out of 8	6.65049	upregulated	6	4.71406	0.009	upregulated	2	1.35551	0.2578	downregulated	3	0.266921	0.7657	upregulated	2	2.23877	0.1066	upregulated	2	1.4702	0.2299	downregulated	2	1.62966	0.196	upregulated	7	1.94773	0.1426	upregulated	5	1.55039	0.2122
positive regulation of cellular response to oxidative stress	GO	3 out of 8	6.63938	downregulated	2	2.9061	0.0547	upregulated	1	3.77638	0.0229	downregulated	1	0.203668	0.8157					downregulated	1	2.57271	0.0763	downregulated	2	2.88482	0.0559	downregulated	1	2.47962	0.0838	downregulated	3	3.40006	0.0334
actin filament	GO	4 out of 8	6.63695	upregulated	5	2.239	0.1066	upregulated	4	0.745661	0.4744	downregulated	6	1.12969	0.3231	downregulated	4	1.40488	0.2454	downregulated	2	1.36367	0.2557	downregulated	5	2.09136	0.1235	downregulated	5	1.59624	0.2027	downregulated	8	1.58568	0.2048
regulation of oxidative stress-induced intrinsic apoptotic signaling pathway	GO	6 out of 8	6.62095	upregulated	3	2.16271	0.115					upregulated	1	0.684074	0.5046					downregulated	1	1.23842	0.2898	downregulated	3	1.34377	0.2609	downregulated	1	0.572916	0.5639	downregulated	2	0.619062	0.5384
lipid storage	GO	6 out of 8	6.60495	upregulated	1	1.6055	0.2008	upregulated	3	2.79227	0.0613	upregulated	1	2.14879	0.1166	downregulated	2	1.68887	0.1847	downregulated	2	2.00862	0.1342	downregulated	2	2.29341	0.1009	upregulated	2	4.82475	0.008	downregulated	2	2.26998	0.1033
striated muscle cell development	GO	5 out of 8	6.55566	upregulated	5	4.40304	0.0122	upregulated	5	1.78397	0.168	downregulated	9	3.7021	0.0247	downregulated	2	2.80436	0.0605	downregulated	5	1.95854	0.1411	downregulated	6	2.22595	0.108	downregulated	5	2.58621	0.0753	downregulated	12	2.69062	0.0678
cellular response to potassium ion	GO	3 out of 8	6.48399																					downregulated	1	1.92789	0.1455	downregulated	1	2.34091	0.0962	downregulated	1	2.21519	0.1091
synapsis	GO	5 out of 8	6.46227	downregulated	1	0.604394	0.5464	upregulated	4	3.76881	0.0231	upregulated	1	1.45034	0.2345	downregulated	1	0.318186	0.7275	downregulated	1	0.576378	0.5619	upregulated	1	0.469234	0.6255	downregulated	3	1.14933	0.3168	downregulated	3	0.909227	0.4028
ribosome biogenesis	GO	5 out of 8	6.45746	upregulated	16	2.89433	0.0553	upregulated	14	3.29162	0.0372	upregulated	4	1.39473	0.2479	upregulated	1	0.570378	0.5653	upregulated	1	0.508071	0.6017	downregulated	12	0.0683602	0.9339	upregulated	22	0.277138	0.7579	upregulated	23	0.97674	0.3765
negative regulation of cellular response to transforming growth factor beta stimulus	GO	3 out of 8	6.45294	upregulated	1	2.56128	0.0772	upregulated	4	4.2282	0.0146	upregulated	6	5.93143	0.0027	downregulated	3	1.1373	0.3207	downregulated	4	3.85224	0.0212	upregulated	8	5.13068	0.0059	upregulated	11	4.19191	0.0151	downregulated	5	3.43484	0.0322
macrophage migration	GO	2 out of 8	6.45231					upregulated	3	9.05601	0.0001					downregulated	1	2.02081	0.1325									upregulated	1	1.28331	0.2771	downregulated	1	0.700416	0.4964
clathrin binding	GO	4 out of 8	6.43334	upregulated	3	2.46979	0.0846	downregulated	1	0.626826	0.5343	downregulated	5	2.7442	0.0643	downregulated	1	2.36766	0.0937	upregulated	2	2.3042	0.0998	downregulated	9	5.64478	0.0035	downregulated	7	3.62284	0.0267	downregulated	7	2.73883	0.0646
intrinsic component of Golgi membrane	GO	6 out of 8	6.41093	downregulated	1	0.715143	0.4891	upregulated	4	4.47092	0.0114	upregulated	3	3.55387	0.0286	downregulated	5	5.93008	0.0027	downregulated	1	0.277583	0.7576	downregulated	3	2.06769	0.1265	downregulated	2	1.55683	0.2108	downregulated	5	1.12925	0.3233
regulation of exosomal secretion	GO	6 out of 8	6.38337	upregulated	1	1.18004	0.3073	upregulated	1	0.904103	0.4049					downregulated	1	1.38792	0.2496	downregulated	1	1.59515	0.2029	downregulated	1	1.27851	0.2785	downregulated	2	1.98883	0.1369	downregulated	1	0.824655	0.4384
negative regulation of transcription from RNA polymerase II promoter in response to stress	GO	3 out of 8	6.3592	upregulated	1	2.30464	0.0998	upregulated	2	3.48906	0.0305	upregulated	1	2.3214	0.0981	downregulated	1	1.75591	0.1727
regulation of glucose import in response to insulin stimulus	GO	4 out of 8	6.33062	upregulated	4	6.27718	0.0019	downregulated	1	0.948803	0.3872	upregulated	1	0.677477	0.5079					downregulated	2	1.48583	0.2263	downregulated	2	2.08892	0.1238	upregulated	3	1.02146	0.3601	upregulated	2	2.22852	0.1077
protein localization to non-motile cilium	GO	5 out of 8	6.32913	upregulated	1	1.72586	0.178	upregulated	1	1.34072	0.2617	upregulated	1	1.46466	0.2312					downregulated	1	2.59584	0.0746	downregulated	1	2.10806	0.1215	upregulated	2	1.81114	0.1635	upregulated	2	1.09487	0.3346
response to radiation	GO	3 out of 8	6.26983	upregulated	17	0.402282	0.6688	upregulated	31	13.3157	1.6e-06	upregulated	15	4.32759	0.0132	downregulated	21	4.37697	0.0126	upregulated	7	1.40165	0.2462	upregulated	25	1.41633	0.2426	upregulated	37	1.58521	0.2049	upregulated	37	2.99562	0.05
small-subunit processome	GO	5 out of 8	6.26686	upregulated	2	0.977713	0.3762	upregulated	2	2.18709	0.1122													downregulated	3	1.62846	0.1962	downregulated	3	0.798946	0.4498	downregulated	2	0.674645	0.5093
negative regulation of multicellular organism growth	GO	4 out of 8	6.26548	downregulated	1	3.62434	0.0267					downregulated	1	0.717273	0.4881					downregulated	1	1.4625	0.2317	downregulated	1	1.78347	0.1681	downregulated	2	2.4176	0.0891	downregulated	2	4.94352	0.0071
positive regulation of response to oxidative stress	GO	3 out of 8	6.20644	downregulated	2	2.84395	0.0582	upregulated	1	3.66648	0.0256	downregulated	1	0.190507	0.8265					downregulated	1	2.46605	0.0849	downregulated	2	2.68529	0.0682	downregulated	1	2.37342	0.0932	downregulated	3	3.10836	0.0447
ER overload response	GO	4 out of 8	6.20581	upregulated	1	0.854083	0.4257	upregulated	2	2.71787	0.066	upregulated	1	2.72444	0.0656	downregulated	1	1.16589	0.3116					downregulated	1	1.46476	0.2311	downregulated	1	1.45301	0.2339	upregulated	1	0.389456	0.6774
programmed necrotic cell death	GO	4 out of 8	6.18214					upregulated	2	7.4595	0.0006	downregulated	2	0.869313	0.4192	downregulated	2	2.08287	0.1246					downregulated	2	0.721423	0.4861	downregulated	1	0.330526	0.7185	downregulated	2	0.622875	0.5364
retina vasculature development in camera-type eye	GO	6 out of 8	6.1294	downregulated	1	2.45893	0.0855	upregulated	1	1.30981	0.2699	upregulated	2	3.40423	0.0332					downregulated	1	1.32435	0.266	downregulated	1	1.27061	0.2807	downregulated	1	1.04302	0.3524	downregulated	1	0.236314	0.7895
regulation of axon guidance	GO	5 out of 8	6.08994	downregulated	2	4.13406	0.016	upregulated	2	2.22494	0.1081	downregulated	5	5.28065	0.0051	downregulated	2	1.60833	0.2002	downregulated	3	3.84351	0.0214	downregulated	3	3.13011	0.0437	downregulated	7	6.14918	0.0021	downregulated	2	1.76525	0.1711
positive regulation of neuron death	GO	4 out of 8	6.08833	downregulated	1	0.213517	0.8077	downregulated	2	3.03516	0.0481	downregulated	5	1.86844	0.1544	downregulated	4	3.10609	0.0448	downregulated	4	1.81623	0.1626	downregulated	7	5.5992	0.0037	downregulated	4	2.10205	0.1222	downregulated	4	1.75889	0.1722
vitamin transport	GO	6 out of 8	6.04725	upregulated	1	1.41913	0.2419	downregulated	1	0.764691	0.4655	downregulated	2	4.14588	0.0158	upregulated	1	1.73433	0.1765	downregulated	1	1.47131	0.2296	downregulated	1	1.66187	0.1898	downregulated	2	1.59916	0.2021	downregulated	1	3.07201	0.0463
retrograde vesicle-mediated transport, Golgi to ER	GO	7 out of 8	6.04544	upregulated	1	0.207417	0.8127	upregulated	5	1.88515	0.1518	upregulated	2	0.486715	0.6146	downregulated	4	1.31806	0.2677	downregulated	1	0.839584	0.4319	downregulated	6	1.21528	0.2966	downregulated	5	1.0404	0.3533	downregulated	6	1.68895	0.1847
translation elongation factor activity	GO	3 out of 8	6.04348					upregulated	1	2.75619	0.0635	upregulated	3	3.63122	0.0265					downregulated	2	1.60822	0.2002	downregulated	3	2.48381	0.0834	downregulated	3	1.95145	0.1421	downregulated	2	1.74469	0.1747
regulation of supramolecular fiber organization	GO	5 out of 8	6.04154	upregulated	22	5.79217	0.0031	upregulated	15	3.60864	0.0271	downregulated	31	6.60128	0.0014	downregulated	16	7.73376	0.0004	downregulated	17	4.03982	0.0176	downregulated	31	6.94244	0.001	upregulated	34	2.42931	0.0881	downregulated	18	2.42283	0.0887
inner ear morphogenesis	GO	4 out of 8	6.02141	downregulated	3	1.79968	0.1654	downregulated	2	1.56803	0.2085	upregulated	6	2.91668	0.0541					downregulated	4	1.76908	0.1705	downregulated	4	0.934423	0.3928	downregulated	6	2.03407	0.1308	upregulated	3	0.0648044	0.9373
activation of cysteine-type endopeptidase activity	GO	4 out of 8	6.00834	downregulated	1	1.53441	0.2156					upregulated	2	3.08419	0.0458	downregulated	1	0.837662	0.4327	downregulated	1	3.4464	0.0319	downregulated	1	2.41354	0.0895	upregulated	2	2.9754	0.051	downregulated	2	2.41168	0.0897
Arp2/3 protein complex	GO	3 out of 8	5.99116									upregulated	1	1.17199	0.3097	upregulated	1	2.71908	0.0659	downregulated	1	2.75326	0.0637	downregulated	2	2.66241	0.0698	downregulated	1	2.19632	0.1112	upregulated	1	1.62083	0.1977
multicellular organism growth	GO	6 out of 8	5.98386	downregulated	4	3.05441	0.0472	downregulated	2	3.06777	0.0465	upregulated	1	5.9431	0.0026	upregulated	1	1.41803	0.2422	downregulated	3	0.459721	0.6315	downregulated	6	0.796369	0.451	downregulated	8	2.44738	0.0865	downregulated	10	1.04144	0.3529
calcium import into the mitochondrion	GO	5 out of 8	5.94651	upregulated	1	1.48845	0.2257	downregulated	2	5.04578	0.0064									downregulated	1	2.24336	0.1061	downregulated	2	2.42652	0.0883	downregulated	1	2.87755	0.0563	downregulated	1	1.9564	0.1414
disulfide oxidoreductase activity	GO	6 out of 8	5.94475	upregulated	3	1.18022	0.3072	upregulated	1	1.54467	0.2134	upregulated	1	0.410413	0.6634	upregulated	1	1.4288	0.2396					downregulated	4	1.17839	0.3078	downregulated	2	0.202254	0.8169	downregulated	1	0.767045	0.4644
regulation of axonogenesis	GO	5 out of 8	5.93936	downregulated	6	6.40808	0.0016	upregulated	5	0.848376	0.4281	downregulated	22	13.4123	1.5e-06	downregulated	14	5.77679	0.0031	downregulated	9	4.85786	0.0078	downregulated	22	13.759	1.1e-06	downregulated	25	8.01019	0.0003	downregulated	16	4.06115	0.0172
chromosome segregation	GO	3 out of 8	5.93161	upregulated	14	1.6821	0.186	upregulated	19	7.64645	0.0005	downregulated	19	1.79309	0.1664	downregulated	9	0.841171	0.4312	upregulated	1	0.532096	0.5874	downregulated	9	0.0678682	0.9344	upregulated	17	0.119547	0.8873	upregulated	12	0.178915	0.8362
positive regulation of cellular response to insulin stimulus	GO	5 out of 8	5.92058	upregulated	4	5.17716	0.0056	downregulated	1	0.758518	0.4684	upregulated	1	0.511846	0.5994					downregulated	2	1.14777	0.3173	downregulated	2	1.58535	0.2049	downregulated	1	0.806493	0.4464	upregulated	2	2.54952	0.0781
negative regulation of response to drug	GO	5 out of 8	5.9147	upregulated	3	2.22185	0.1084	upregulated	2	4.4119	0.0121	downregulated	5	4.96776	0.007	downregulated	1	2.13228	0.1186	downregulated	3	3.03556	0.048	downregulated	4	2.04898	0.1289	downregulated	4	1.4119	0.2437	upregulated	1	0.115445	0.891
acid-amino acid ligase activity	GO	5 out of 8	5.8957	downregulated	1	1.02771	0.3578	upregulated	1	1.95031	0.1422	upregulated	2	2.43532	0.0876									downregulated	1	0.29164	0.747	downregulated	1	0.506388	0.6027	downregulated	1	1.73975	0.1756
oxidoreductase activity, acting on a sulfur group of donors	GO	6 out of 8	5.89257	upregulated	4	1.18329	0.3063	upregulated	2	1.20993	0.2982	upregulated	1	0.233789	0.7915	upregulated	1	1.12102	0.3259					downregulated	6	1.58899	0.2041	upregulated	3	0.39014	0.677	downregulated	4	0.945681	0.3884
adenylate cyclase-activating adrenergic receptor signaling pathway	GO	5 out of 8	5.88274					upregulated	1	0.919202	0.3988	downregulated	1	0.26833	0.7647					downregulated	1	0.800793	0.449	downregulated	1	1.07766	0.3404	downregulated	1	1.65892	0.1903	downregulated	2	1.69449	0.1837
adrenergic receptor signaling pathway	GO	5 out of 8	5.88274					upregulated	1	0.919202	0.3988	downregulated	1	0.26833	0.7647					downregulated	1	0.800793	0.449	downregulated	1	1.07766	0.3404	downregulated	1	1.65892	0.1903	downregulated	2	1.69449	0.1837
chemical homeostasis within a tissue	GO	5 out of 8	5.87373	downregulated	1	4.59911	0.0101					upregulated	1	1.95545	0.1415					downregulated	1	1.89835	0.1498	downregulated	1	2.6202	0.0728	downregulated	2	2.34393	0.096	downregulated	1	1.65491	0.1911
protein tag	GO	2 out of 8	5.87168	upregulated	3	5.80501	0.003	upregulated	1	1.35367	0.2583																	upregulated	1	0.465762	0.6277	upregulated	1	0.821232	0.4399
regulation of glutamate secretion	GO	5 out of 8	5.86817	upregulated	2	1.60561	0.2008					downregulated	1	2.83212	0.0589	upregulated	1	2.56047	0.0773	upregulated	1	3.10382	0.0449	downregulated	2	3.06549	0.0466	downregulated	1	2.52316	0.0802	downregulated	1	2.04937	0.1288
immune response-activating signal transduction	GO	3 out of 8	5.85407	upregulated	13	4.04632	0.0175	downregulated	3	4.77078	0.0085	downregulated	49	28.5618	3.9e-13	downregulated	37	39.1802	9.6e-18	downregulated	8	2.65657	0.0702	downregulated	12	2.55424	0.0778	downregulated	14	2.23991	0.1065	downregulated	20	0.643264	0.5256
Ras guanyl-nucleotide exchange factor activity	GO	3 out of 8	5.84303	upregulated	21	3.78456	0.0227	upregulated	8	1.07343	0.3418	downregulated	28	10.7809	2.1e-05	downregulated	19	5.03191	0.0065	upregulated	8	3.6112	0.027	downregulated	20	3.0654	0.0466	downregulated	17	1.83667	0.1593	downregulated	25	4.55216	0.0105
regulation of protein localization to centrosome	GO	4 out of 8	5.82601					upregulated	1	3.46834	0.0312	downregulated	1	1.19508	0.3027									downregulated	1	1.54864	0.2125	downregulated	1	1.53674	0.2151	downregulated	1	0.467373	0.6266
regulation of behavior	GO	5 out of 8	5.79359	upregulated	6	6.3232	0.0018	upregulated	3	1.5362	0.2152	upregulated	1	1.48385	0.2268	downregulated	2	1.1783	0.3078	upregulated	1	2.92899	0.0535	downregulated	5	1.5615	0.2098	upregulated	3	1.95108	0.1421	downregulated	3	0.947216	0.3878
homologous chromosome segregation	GO	5 out of 8	5.78833	upregulated	2	0.906329	0.404	upregulated	5	3.75629	0.0234	upregulated	1	1.29484	0.2739	downregulated	1	0.236587	0.7893	downregulated	1	0.4669	0.6269	upregulated	2	0.370129	0.6906	downregulated	3	0.794176	0.452	upregulated	1	0.823498	0.4389
establishment of protein localization to organelle	GO	6 out of 8	5.78147	upregulated	21	0.726675	0.4835	upregulated	16	2.02639	0.1318	upregulated	12	2.3292	0.0974	downregulated	17	2.79881	0.0609	downregulated	9	1.39528	0.2478	downregulated	25	0.730504	0.4817	upregulated	46	1.1063	0.3308	downregulated	17	2.47854	0.0839
epithelial cell development	GO	2 out of 8	5.77557	downregulated	7	3.61725	0.0269	upregulated	5	4.0839	0.0168	downregulated	17	2.32495	0.0978	upregulated	3	1.82974	0.1605	downregulated	5	4.28967	0.0137	upregulated	15	2.42934	0.0881	downregulated	10	3.2719	0.0379	downregulated	19	4.93301	0.0072
positive regulation of cellular protein catabolic process	GO	5 out of 8	5.77309	upregulated	10	2.18725	0.1122	upregulated	8	2.71827	0.066	downregulated	13	4.55006	0.0106	downregulated	8	1.62061	0.1978	downregulated	6	1.83183	0.1601	downregulated	14	4.11488	0.0163	downregulated	9	2.85737	0.0574	upregulated	8	1.76584	0.171
protein localization to cilium	GO	6 out of 8	5.7446	upregulated	4	1.98165	0.1378	upregulated	2	0.851141	0.4269	upregulated	3	2.78136	0.062	upregulated	1	1.40992	0.2442	downregulated	1	1.48595	0.2263	downregulated	1	1.05377	0.3486	upregulated	5	2.18861	0.1121	upregulated	4	1.63058	0.1958
respiratory gaseous exchange	GO	5 out of 8	5.72665	upregulated	2	1.57193	0.2076	upregulated	2	1.73608	0.1762	downregulated	1	2.32205	0.0981	upregulated	2	2.46563	0.085	downregulated	2	4.05059	0.0174	downregulated	4	2.3248	0.0978	upregulated	4	3.55037	0.0287	downregulated	2	1.18613	0.3054
negative regulation of cell size	GO	3 out of 8	5.67475									upregulated	1	1.94523	0.143	upregulated	1	3.89833	0.0203									upregulated	1	0.859729	0.4233	downregulated	1	0.690923	0.5011
positive regulation of peptidyl-lysine acetylation	GO	5 out of 8	5.67191	upregulated	2	0.862335	0.4222	upregulated	1	2.10401	0.122	upregulated	1	0.646998	0.5236					downregulated	2	1.7451	0.1746	downregulated	2	2.57213	0.0764	downregulated	2	2.39018	0.0916	upregulated	4	2.90375	0.0548
oxidoreductase activity, acting on the CH-CH group of donors	GO	4 out of 8	5.64377	upregulated	3	2.40377	0.0904	upregulated	4	8.20249	0.0003	upregulated	3	2.14042	0.1176	downregulated	4	5.45383	0.0043	downregulated	1	0.793001	0.4525	downregulated	3	0.811306	0.4443	upregulated	3	1.23498	0.2908	upregulated	6	2.44208	0.087
ATP-dependent helicase activity	GO	5 out of 8	5.63895	upregulated	1	0.0800098	0.9231	upregulated	6	4.89125	0.0075	downregulated	4	0.331808	0.7176	downregulated	3	1.07495	0.3413	downregulated	2	0.968773	0.3795	downregulated	4	0.516842	0.5964	downregulated	3	0.718945	0.4873	upregulated	5	0.130107	0.878
oxidoreductase activity, acting on the CH-NH2 group of donors	GO	2 out of 8	5.62975					upregulated	2	3.58696	0.0277	upregulated	3	5.71697	0.0033									upregulated	1	1.63157	0.1956	upregulated	1	1.80812	0.164	upregulated	1	0.234484	0.791
negative regulation of proteolysis involved in cellular protein catabolic process	GO	4 out of 8	5.62865	downregulated	1	2.20505	0.1102	upregulated	2	0.526919	0.5904	downregulated	4	1.30203	0.272	downregulated	5	1.69849	0.183	downregulated	4	2.788	0.0615	downregulated	6	2.28626	0.1016	downregulated	4	1.03108	0.3566	downregulated	4	1.28265	0.2773
cellular modified amino acid catabolic process	GO	4 out of 8	5.62789					upregulated	2	1.93163	0.1449	upregulated	1	2.51252	0.0811									downregulated	2	0.679455	0.5069	downregulated	2	1.42061	0.2416	upregulated	1	0.91633	0.4
transcription corepressor binding	GO	5 out of 8	5.61735	upregulated	1	0.967542	0.38	upregulated	3	3.19309	0.041	downregulated	1	0.276478	0.7585	downregulated	1	0.757831	0.4687	downregulated	1	2.54851	0.0782	downregulated	1	1.26466	0.2823	downregulated	1	1.11759	0.3271	upregulated	2	2.43974	0.0872
amine binding	GO	2 out of 8	5.59584	upregulated	1	4.62313	0.0098																	downregulated	1	0.972713	0.3781
mitotic spindle organization	GO	5 out of 8	5.59582	upregulated	5	2.01208	0.1337	upregulated	5	2.53913	0.0789	downregulated	8	2.7902	0.0614	downregulated	4	1.23708	0.2902	downregulated	3	0.718595	0.4874	downregulated	5	2.31504	0.0988	downregulated	2	1.595	0.2029	downregulated	4	2.45534	0.0858
establishment of tissue polarity	GO	4 out of 8	5.5811	upregulated	3	4.39979	0.0123	upregulated	2	2.68208	0.0684	upregulated	2	1.96807	0.1397					upregulated	1	2.00864	0.1342	upregulated	2	1.15802	0.3141	upregulated	3	1.80997	0.1637	downregulated	2	1.50778	0.2214
establishment of chromosome localization	GO	4 out of 8	5.5098	upregulated	5	2.293	0.101	upregulated	6	3.53638	0.0291	downregulated	3	1.27852	0.2784	downregulated	2	1.23617	0.2905	downregulated	4	2.40322	0.0904	downregulated	4	0.945689	0.3884	downregulated	4	0.598077	0.5499	upregulated	4	1.15381	0.3154
entrainment of circadian clock	GO	4 out of 8	5.49347	upregulated	1	0.391579	0.676	upregulated	2	1.11751	0.3271	upregulated	2	2.90205	0.0549	upregulated	1	2.21249	0.1094					upregulated	1	0.0419018	0.959	upregulated	3	0.322061	0.7247	upregulated	2	0.766195	0.4648
aromatic amino acid family metabolic process	GO	5 out of 8	5.47553	downregulated	2	1.99074	0.1366	downregulated	1	0.882816	0.4136	upregulated	2	2.4522	0.0861	upregulated	1	1.63705	0.1946	downregulated	1	1.38608	0.2501	downregulated	1	0.737016	0.4785	downregulated	4	2.13673	0.118	downregulated	3	1.25309	0.2856
ganglion development	GO	3 out of 8	5.47368	upregulated	2	5.87019	0.0028													downregulated	1	0.875973	0.4165	upregulated	1	0.748252	0.4732	upregulated	1	1.2733	0.2799	downregulated	1	0.749068	0.4728
regulation of bile acid metabolic process	GO	3 out of 8	5.47024									upregulated	1	4.19681	0.015	downregulated	1	1.99136	0.1365	downregulated	1	2.02414	0.1321	downregulated	1	1.30503	0.2712	downregulated	1	1.16333	0.3124	downregulated	1	1.24066	0.2892
clathrin coat	GO	5 out of 8	5.39665	downregulated	3	3.02576	0.0485	downregulated	3	2.3543	0.095	downregulated	5	2.84116	0.0584	upregulated	1	2.42533	0.0884	downregulated	2	2.41637	0.0892	downregulated	3	2.90887	0.0545	downregulated	3	2.48232	0.0835	downregulated	5	3.38498	0.0339
embryonic brain development	GO	4 out of 8	5.38887									downregulated	1	0.635024	0.5299					downregulated	1	1.32676	0.2653	downregulated	1	1.62921	0.1961	downregulated	1	1.84472	0.1581	downregulated	1	1.2232	0.2943
viral budding via host ESCRT complex	GO	5 out of 8	5.38847	upregulated	1	1.18004	0.3073	upregulated	2	2.36984	0.0935	upregulated	1	1.2624	0.283					downregulated	1	1.45907	0.2325	downregulated	1	1.14991	0.3167	upregulated	2	1.35305	0.2585	upregulated	1	0.679748	0.5067
RNA polymerase II, holoenzyme	GO	5 out of 8	5.37146	upregulated	4	1.25269	0.2857	upregulated	5	2.47839	0.0839	downregulated	7	1.18539	0.3056	upregulated	1	3.72028	0.0242	downregulated	2	0.708858	0.4922	downregulated	2	0.279924	0.7558	upregulated	11	1.37655	0.2524	upregulated	6	0.506739	0.6025
leukocyte differentiation	GO	2 out of 8	5.37078	downregulated	11	1.99937	0.1354	upregulated	7	2.25323	0.1051	downregulated	36	17.7973	1.9e-08	downregulated	20	12.1536	5.3e-06	downregulated	4	3.54043	0.029	upregulated	22	3.1741	0.0418	downregulated	5	4.23962	0.0144	upregulated	13	2.40927	0.0899
regulation of regulated secretory pathway	GO	6 out of 8	5.36053	upregulated	4	0.395931	0.6731	upregulated	4	1.71091	0.1807	downregulated	12	9.92653	4.9e-05	downregulated	10	15.143	2.7e-07	downregulated	8	3.6845	0.0251	downregulated	15	8.03845	0.0003	downregulated	14	8.65029	0.0002	downregulated	10	7.94996	0.0004
immunoglobulin production	GO	4 out of 8	5.33822	downregulated	2	0.858231	0.4239	downregulated	1	0.76169	0.4669	downregulated	5	3.32182	0.0361	downregulated	5	3.02412	0.0486	downregulated	2	1.33924	0.262	downregulated	2	1.15988	0.3135	downregulated	2	1.30155	0.2721	downregulated	4	1.53755	0.2149
outer mitochondrial membrane protein complex	GO	4 out of 8	5.32598	upregulated	1	0.702666	0.4953	upregulated	1	0.992992	0.3705	downregulated	2	1.5654	0.209					downregulated	2	2.66283	0.0698	downregulated	3	2.53289	0.0794
negative regulation of DNA biosynthetic process	GO	4 out of 8	5.30955	upregulated	3	2.02412	0.1321	upregulated	2	2.77032	0.0626	downregulated	3	1.54932	0.2124	downregulated	1	0.758712	0.4683	downregulated	2	4.313	0.0134	downregulated	3	2.57746	0.076	upregulated	9	3.33275	0.0357	upregulated	4	0.734555	0.4797
regulation of type B pancreatic cell proliferation	GO	3 out of 8	5.30316																	downregulated	1	1.6316	0.1956	downregulated	1	1.6752	0.1873	downregulated	1	1.99636	0.1358
muscle cell development	GO	5 out of 8	5.28328	upregulated	6	4.23257	0.0145	upregulated	5	1.53749	0.2149	downregulated	11	3.61303	0.027	downregulated	3	2.71703	0.0661	downregulated	5	1.6911	0.1843	downregulated	6	1.83991	0.1588	downregulated	5	2.36161	0.0943	downregulated	12	2.31227	0.099
cellular response to extracellular stimulus	GO	5 out of 8	5.24288	downregulated	4	3.80864	0.0222	upregulated	6	4.15948	0.0156	upregulated	13	6.79454	0.0011	downregulated	15	7.20812	0.0007	downregulated	11	2.07307	0.1258	downregulated	15	2.11187	0.121	downregulated	18	2.3098	0.0993	upregulated	20	1.18912	0.3045
insulin-like growth factor binding	GO	4 out of 8	5.23929	downregulated	1	1.68768	0.1849	upregulated	1	2.68614	0.0681	downregulated	1	1.2803	0.278	downregulated	2	4.42077	0.012	downregulated	2	1.85668	0.1562	downregulated	1	1.00847	0.3648	downregulated	1	1.37849	0.252	downregulated	1	0.995644	0.3695
isoprenoid binding	GO	4 out of 8	5.2288	upregulated	1	1.45285	0.2339	upregulated	1	0.730283	0.4818	upregulated	3	4.39756	0.0123	downregulated	2	1.73812	0.1759					upregulated	2	0.236046	0.7897	upregulated	1	0.0262028	0.9741	downregulated	2	0.648485	0.5228
tubulin binding	GO	6 out of 8	5.15056	upregulated	21	4.42685	0.012	upregulated	13	1.7345	0.1765	downregulated	35	9.83566	5.4e-05	downregulated	21	6.52196	0.0015	downregulated	13	2.42953	0.0881	downregulated	30	3.38845	0.0338	downregulated	25	3.66387	0.0256	downregulated	22	5.86498	0.0028
proton-transporting two-sector ATPase complex, proton-transporting domain	GO	3 out of 8	5.12583	upregulated	1	1.78753	0.1674	upregulated	1	2.68548	0.0682	upregulated	1	2.72833	0.0653									upregulated	1	0.766058	0.4648	upregulated	1	0.949399	0.387	upregulated	1	0.360062	0.6976
negative regulation of protein localization to cell surface	GO	4 out of 8	5.06346	downregulated	1	1.75511	0.1729	upregulated	2	3.46663	0.0312					downregulated	1	1.06029	0.3464	downregulated	1	3.071	0.0464	downregulated	1	2.31489	0.0988	downregulated	1	2.09775	0.1227	upregulated	3	3.07141	0.0464
sperm principal piece	GO	3 out of 8	5.03061	upregulated	1	0.648874	0.5226	upregulated	2	3.10522	0.0448	upregulated	1	1.47399	0.229													upregulated	1	0.197472	0.8208
dioxygenase activity	GO	4 out of 8	5.02989	downregulated	3	2.39089	0.0915	upregulated	6	2.44662	0.0866	downregulated	5	0.752375	0.4712	upregulated	3	3.27369	0.0379	upregulated	1	0.842695	0.4305	downregulated	6	1.3071	0.2706	downregulated	5	1.14575	0.318	downregulated	7	2.04769	0.129
protein localization to cell junction	GO	4 out of 8	5.02064	upregulated	1	2.18494	0.1125					downregulated	1	0.662583	0.5155									downregulated	1	1.49169	0.225	downregulated	1	1.4516	0.2342	downregulated	1	0.555001	0.5741
regulation of protein localization to membrane	GO	5 out of 8	5.01781	upregulated	10	2.18144	0.1129	downregulated	5	1.50327	0.2224	upregulated	7	3.01459	0.0491	downregulated	7	2.66584	0.0695	downregulated	10	2.50853	0.0814	downregulated	14	3.80829	0.0222	upregulated	14	4.66018	0.0095	downregulated	12	2.33426	0.0969
dystrophin-associated glycoprotein complex	GO	5 out of 8	5.01495	upregulated	2	1.22604	0.2935	upregulated	1	1.37682	0.2524	downregulated	2	0.870935	0.4186	downregulated	1	1.3731	0.2533	downregulated	1	0.658036	0.5179	upregulated	2	1.55259	0.2117	downregulated	4	2.9926	0.0502	downregulated	2	2.55809	0.0775
leukotriene D4 biosynthetic process	GO	4 out of 8	5.01286					upregulated	1	2.85468	0.0576	downregulated	1	1.1116	0.329									downregulated	1	0.860734	0.4229	downregulated	1	1.32987	0.2645	downregulated	1	1.07917	0.3399
sulfur compound metabolic process	GO	5 out of 8	4.98886	downregulated	6	0.593761	0.5522	upregulated	12	2.08874	0.1238	upregulated	13	3.95851	0.0191	downregulated	18	4.21332	0.0148	downregulated	9	2.41114	0.0897	downregulated	17	0.988678	0.3721	downregulated	19	0.754638	0.4702	upregulated	9	0.405766	0.6665
regulation of cardiac muscle cell differentiation	GO	4 out of 8	4.9873	upregulated	3	4.72004	0.0089					downregulated	3	3.79086	0.0226	downregulated	2	2.17202	0.1139	upregulated	2	2.13261	0.1185	downregulated	2	1.96555	0.1401	downregulated	1	1.88461	0.1519	downregulated	3	2.37998	0.0926
negative regulation of calcineurin-mediated signaling	GO	4 out of 8	4.97349									upregulated	1	1.65408	0.1913									downregulated	1	1.32043	0.267	downregulated	1	1.30897	0.2701	downregulated	1	0.69002	0.5016
neuropeptide receptor binding	GO	2 out of 8	4.92222	upregulated	1	3.8127	0.0221					upregulated	1	3.45643	0.0315									upregulated	1	0.581072	0.5593	upregulated	1	1.056	0.3478	upregulated	2	0.709843	0.4917
proton-transporting two-sector ATPase complex	GO	5 out of 8	4.92104	upregulated	2	1.07977	0.3397	upregulated	1	1.90614	0.1487	upregulated	1	1.6954	0.1835	downregulated	1	0.387871	0.6785	downregulated	1	0.471846	0.6238	downregulated	2	0.634444	0.5302	upregulated	1	0.400403	0.67	upregulated	1	0.0782909	0.9247
positive regulation of vascular smooth muscle cell proliferation	GO	5 out of 8	4.87171	upregulated	2	1.17139	0.3099					upregulated	1	0.5312	0.5879	downregulated	1	0.94824	0.3874					downregulated	2	1.51288	0.2203	downregulated	1	0.386686	0.6793	downregulated	2	2.2178	0.1088
ATP-dependent RNA helicase activity	GO	4 out of 8	4.85872	upregulated	1	0.288662	0.7493	downregulated	1	1.23284	0.2915	downregulated	1	0.0728783	0.9297	upregulated	1	1.0966	0.334	downregulated	2	1.84432	0.1581	downregulated	3	1.229	0.2926	downregulated	2	1.51606	0.2196	downregulated	1	0.269348	0.7639
regulation of clathrin-dependent endocytosis	GO	4 out of 8	4.83469	upregulated	4	4.7521	0.0086	downregulated	1	1.21565	0.2965	downregulated	2	2.14364	0.1172	downregulated	1	0.697952	0.4976	downregulated	1	1.16543	0.3118	downregulated	3	1.56951	0.2081	downregulated	2	1.49361	0.2246	upregulated	1	0.0887306	0.9151
receptor complex	GO	6 out of 8	4.80087	upregulated	20	5.30089	0.005	upregulated	7	3.4619	0.0314	downregulated	37	18.6737	7.8e-09	downregulated	26	21.7876	3.4e-10	downregulated	19	6.92892	0.001	downregulated	35	9.60117	6.8e-05	downregulated	38	12.1921	5.1e-06	downregulated	29	7.77731	0.0004
somatic diversification of immunoglobulins	GO	4 out of 8	4.79699	downregulated	1	0.583245	0.5581					downregulated	2	1.41023	0.2441	downregulated	3	2.30202	0.1001	downregulated	2	2.36477	0.094	downregulated	2	2.12953	0.1189	downregulated	2	2.41094	0.0897	downregulated	2	2.18725	0.1122
regulation of macrophage apoptotic process	GO	1 out of 8	4.79467	upregulated	1	4.79467	0.0083
disordered domain specific binding	GO	5 out of 8	4.74358					upregulated	1	0.237608	0.7885	downregulated	6	2.40516	0.0903	downregulated	5	3.76652	0.0231	downregulated	2	2.63185	0.0719	downregulated	3	3.2296	0.0396	downregulated	2	2.63602	0.0716	downregulated	2	2.18018	0.113
maintenance of protein location in nucleus	GO	4 out of 8	4.7424	upregulated	2	1.27423	0.2796	upregulated	2	4.41148	0.0121	downregulated	2	0.930464	0.3944	downregulated	1	0.837446	0.4328	downregulated	1	1.05304	0.3489	downregulated	1	1.1217	0.3257	upregulated	4	0.895822	0.4083	upregulated	2	0.454325	0.6349
cytokine activity	GO	3 out of 8	4.71474	downregulated	9	4.74326	0.0087	upregulated	3	3.59903	0.0274	downregulated	8	2.26631	0.1037	downregulated	5	2.91303	0.0543	downregulated	1	1.51021	0.2209	downregulated	3	1.77781	0.169	upregulated	7	2.30926	0.0993	downregulated	6	3.73599	0.0238
mitochondrial inner membrane presequence translocase complex	GO	3 out of 8	4.70249																					downregulated	3	3.00591	0.0495	downregulated	1	0.634685	0.5301	downregulated	1	1.0619	0.3458
regulation of cell proliferation involved in heart morphogenesis	GO	3 out of 8	4.70182	downregulated	1	1.03469	0.3553	upregulated	1	1.34779	0.2598	upregulated	3	5.01923	0.0066	downregulated	1	1.47326	0.2292	downregulated	1	1.39132	0.2487	downregulated	1	1.22257	0.2945	upregulated	2	1.4794	0.2278	upregulated	1	0.548577	0.5778
regulation of amyloid precursor protein catabolic process	GO	6 out of 8	4.69214	upregulated	1	0.386221	0.6796	upregulated	1	0.626748	0.5343	downregulated	3	3.24205	0.0391	downregulated	2	1.91212	0.1478	downregulated	2	3.39521	0.0335	downregulated	2	2.81647	0.0598	downregulated	1	1.2606	0.2835	downregulated	1	1.36107	0.2564
heme-copper terminal oxidase activity	GO	5 out of 8	4.68622	upregulated	1	1.46654	0.2307	upregulated	2	2.30734	0.0995	upregulated	1	0.93659	0.392					downregulated	1	1.20343	0.3002	downregulated	2	1.34444	0.2607	upregulated	1	1.13005	0.323	upregulated	1	1.44207	0.2364
polysaccharide binding	GO	4 out of 8	4.65531					upregulated	1	1.22969	0.2924	upregulated	2	3.34443	0.0353									downregulated	1	0.449118	0.6382	downregulated	1	0.666961	0.5133	downregulated	3	2.30954	0.0993
ribonuclease P complex	GO	2 out of 8	4.64595	upregulated	1	1.56871	0.2083					upregulated	2	4.35173	0.0129	downregulated	1	1.27449	0.2796
regulation of viral genome replication	GO	1 out of 8	4.60513	downregulated	5	2.65344	0.0704	upregulated	8	8.49811	0.0002	downregulated	1	0.0123737	0.9877					upregulated	1	0.189508	0.8274	upregulated	5	0.437591	0.6456	upregulated	6	0.178627	0.8364	upregulated	6	0.421439	0.6561
cell cycle G2/M phase transition	GO	5 out of 8	4.59757	upregulated	11	4.28665	0.0138	upregulated	10	7.30599	0.0007	downregulated	15	4.64393	0.0096	downregulated	8	4.0922	0.0167	upregulated	1	0.911796	0.4018	downregulated	8	1.05747	0.3473	downregulated	10	0.905643	0.4043	downregulated	6	0.689743	0.5017
cilium organization	GO	5 out of 8	4.5857	upregulated	28	7.18773	0.0008	upregulated	25	10.4411	2.9e-05	upregulated	11	1.44366	0.2361	upregulated	3	0.707268	0.493	downregulated	11	1.27759	0.2787	upregulated	39	3.47872	0.0308	upregulated	57	9.22632	9.8e-05	upregulated	38	3.76655	0.0231
monooxygenase activity	GO	4 out of 8	4.57894	downregulated	2	1.21427	0.2969	downregulated	2	4.34122	0.013	downregulated	7	2.60813	0.0737	downregulated	4	3.74043	0.0237	downregulated	1	0.176602	0.8381	downregulated	2	1.45033	0.2345	downregulated	4	1.18329	0.3063	downregulated	3	1.76872	0.1706
regulation of circadian rhythm	GO	6 out of 8	4.53747	upregulated	8	2.57484	0.0762	upregulated	5	1.56415	0.2093	upregulated	3	1.69891	0.1829	downregulated	5	1.38917	0.2493	downregulated	4	0.618734	0.5386	downregulated	7	1.88245	0.1522	downregulated	8	1.75278	0.1733	upregulated	14	4.16522	0.0155
cellular response to virus	GO	3 out of 8	4.53391	downregulated	1	1.01151	0.3637	upregulated	2	2.03579	0.1306	upregulated	1	4.51094	0.011	downregulated	1	0.446955	0.6396					upregulated	1	0.304298	0.7376	upregulated	1	0.794438	0.4518	downregulated	1	0.544384	0.5802
telomeric loop disassembly	GO	2 out of 8	4.50367	upregulated	1	1.55757	0.2106	upregulated	1	2.9461	0.0525
tricarboxylic acid metabolic process	GO	4 out of 8	4.49835	upregulated	2	0.693252	0.4999					upregulated	3	3.21846	0.04									downregulated	2	0.38871	0.6779	downregulated	2	0.381415	0.6829	upregulated	1	0.183489	0.8324
cytoplasmic side of membrane	GO	3 out of 8	4.48709	upregulated	11	7.29572	0.0007	upregulated	3	1.02295	0.3595	downregulated	14	6.04314	0.0024	upregulated	3	4.66426	0.0094	downregulated	8	3.32125	0.0361	upregulated	18	4.751	0.0086	upregulated	18	3.98875	0.0185	upregulated	17	4.48715	0.0113
intronic transcription regulatory region sequence-specific DNA binding	GO	4 out of 8	4.47062	upregulated	2	2.48764	0.0831	upregulated	2	3.12785	0.0438					upregulated	1	3.37486	0.0342					upregulated	1	2.29205	0.1011	upregulated	2	2.81735	0.0598	downregulated	1	0.589659	0.5545
positive regulation of telomere capping	GO	5 out of 8	4.42431	upregulated	2	3.25254	0.0387	upregulated	1	1.5617	0.2098	downregulated	1	1.76773	0.1707					downregulated	1	0.813186	0.4434	downregulated	1	0.839739	0.4318	downregulated	1	1.02433	0.359	upregulated	2	1.29945	0.2727
regulation of non-motile cilium assembly	GO	4 out of 8	4.41812	upregulated	1	3.21338	0.0402	downregulated	1	1.30306	0.2717	downregulated	3	2.65854	0.0701	downregulated	2	2.10173	0.1222	upregulated	1	1.92616	0.1457	downregulated	1	3.35664	0.0349	downregulated	1	1.84045	0.1587	downregulated	2	3.99714	0.0184
heme binding	GO	5 out of 8	4.40425	downregulated	5	3.09214	0.0454	upregulated	4	1.53565	0.2153	downregulated	9	4.98258	0.0069	downregulated	5	3.90902	0.0201	downregulated	5	4.17655	0.0154	downregulated	8	3.23845	0.0392	downregulated	8	3.52631	0.0294	downregulated	7	3.91104	0.02
tRNA 5'-end processing	GO	2 out of 8	4.40158	upregulated	1	1.41563	0.2428					upregulated	2	4.11542	0.0163	downregulated	1	1.12947	0.3232
oxidoreductase activity, acting on diphenols and related substances as donors	GO	3 out of 8	4.39872																	downregulated	1	1.83307	0.1599	downregulated	1	1.58896	0.2041	downregulated	1	0.976684	0.3766
inositol phosphate phosphatase activity	GO	4 out of 8	4.36079	upregulated	2	1.81646	0.1626	downregulated	1	1.0329	0.356	downregulated	2	2.19238	0.1117	upregulated	1	3.04307	0.0477	downregulated	1	1.39736	0.2472	downregulated	1	1.48849	0.2257					upregulated	1	0.159311	0.8527
cellular aldehyde metabolic process	GO	4 out of 8	4.35881	downregulated	2	0.822319	0.4394	upregulated	5	2.61505	0.0732	upregulated	2	1.50222	0.2226	downregulated	6	6.45841	0.0016	downregulated	2	0.732441	0.4807	downregulated	2	1.18074	0.307	downregulated	3	1.25876	0.284	downregulated	3	1.18686	0.3052
glycerol ether metabolic process	GO	3 out of 8	4.34407	downregulated	1	1.82736	0.1608	upregulated	2	5.23617	0.0053	upregulated	1	2.33684	0.0966									upregulated	2	1.84714	0.1577	upregulated	1	1.20955	0.2983	downregulated	2	1.65511	0.1911
transcription factor activity, RNA polymerase II distal enhancer sequence-specific binding	GO	3 out of 8	4.30452	upregulated	2	2.43638	0.0875	downregulated	1	2.36299	0.0941	downregulated	11	3.55692	0.0285	downregulated	6	2.8768	0.0563	downregulated	3	2.98831	0.0504	downregulated	4	2.01021	0.134	upregulated	11	2.81538	0.0599	downregulated	5	2.12137	0.1199
mitochondrial outer membrane translocase complex	GO	2 out of 8	4.29333	upregulated	1	1.16271	0.3126													downregulated	1	2.09463	0.1231	downregulated	2	2.19871	0.1109
platelet morphogenesis	GO	3 out of 8	4.28152	upregulated	1	4.10551	0.0165	upregulated	1	1.32285	0.2664	downregulated	3	1.80659	0.1642																	downregulated	2	0.659749	0.517
negative regulation of receptor binding	GO	2 out of 8	4.26333									upregulated	1	1.01294	0.3631	upregulated	1	3.25039	0.0388
SNAP receptor activity	GO	4 out of 8	4.2537	downregulated	1	1.43696	0.2376	upregulated	3	1.93857	0.1439	downregulated	2	0.392755	0.6752	downregulated	1	0.586911	0.556	downregulated	1	0.345639	0.7078	downregulated	2	1.12158	0.3258	downregulated	2	0.875851	0.4165	downregulated	3	1.91064	0.148
kinase regulator activity	GO	5 out of 8	4.25231	upregulated	10	0.955035	0.3848	upregulated	7	2.38253	0.0923	downregulated	14	4.93743	0.0072	downregulated	8	4.8296	0.008	downregulated	8	3.51458	0.0298	downregulated	12	2.32997	0.0973	upregulated	17	0.774666	0.4609	downregulated	14	0.674452	0.5094
positive regulation of insulin secretion involved in cellular response to glucose stimulus	GO	4 out of 8	4.23943	upregulated	2	1.45849	0.2326					upregulated	1	0.751989	0.4714					downregulated	2	3.43323	0.0323	downregulated	2	2.13586	0.1181	downregulated	2	1.63409	0.1951	upregulated	1	3.03837	0.0479
response to mechanical stimulus	GO	5 out of 8	4.22672	upregulated	6	1.7546	0.173	upregulated	9	5.33268	0.0048	downregulated	17	6.74913	0.0012	downregulated	14	8.02827	0.0003	downregulated	11	3.55488	0.0286	downregulated	20	7.95229	0.0004	downregulated	16	3.921	0.0198	upregulated	12	3.51134	0.0299
response to metal ion	GO	5 out of 8	4.17228	upregulated	18	2.8604	0.0572	upregulated	14	5.7227	0.0033	downregulated	20	8.89086	0.0001	downregulated	19	6.06224	0.0023	downregulated	15	2.39229	0.0914	downregulated	28	5.94692	0.0026	downregulated	28	4.54188	0.0107	upregulated	26	2.3388	0.0964
positive regulation of protein polyubiquitination	GO	4 out of 8	4.16678	upregulated	1	0.687945	0.5026	upregulated	2	2.73629	0.0648	upregulated	1	1.09637	0.3341	downregulated	1	1.13382	0.3218									downregulated	1	0.779996	0.4584
gamma-tubulin complex	GO	3 out of 8	4.1384	upregulated	1	1.37453	0.253	downregulated	1	1.24195	0.2888	downregulated	2	1.00206	0.3671	downregulated	1	0.733045	0.4804	upregulated	1	2.74631	0.0642	downregulated	1	2.16442	0.1148	downregulated	1	2.45643	0.0857	downregulated	2	2.26387	0.1039
negative regulation of cytokine production involved in inflammatory response	GO	1 out of 8	4.12137	upregulated	1	4.12137	0.0162
tetrapyrrole binding	GO	5 out of 8	4.12111	downregulated	5	2.9146	0.0542	upregulated	4	1.49065	0.2252	downregulated	9	4.83863	0.0079	downregulated	6	3.71516	0.0244	downregulated	5	4.03258	0.0177	downregulated	8	3.06904	0.0465	downregulated	8	3.33306	0.0357	downregulated	7	3.66416	0.0256
positive regulation of cytokine production involved in inflammatory response	GO	3 out of 8	4.11365	downregulated	2	3.30334	0.0368	upregulated	2	3.90022	0.0202									downregulated	1	1.81595	0.1627	upregulated	2	1.77242	0.1699					downregulated	1	1.70082	0.1825
FMN binding	GO	4 out of 8	4.07785									downregulated	2	2.87459	0.0564	downregulated	1	1.3364	0.2628	downregulated	1	1.4108	0.2439	downregulated	1	2.02053	0.1326	downregulated	1	2.63692	0.0716	downregulated	1	2.22059	0.1085
regulation of leukocyte mediated cytotoxicity	GO	3 out of 8	4.0753	downregulated	2	1.68815	0.1849					downregulated	9	6.5188	0.0015	downregulated	7	7.7966	0.0004	downregulated	1	1.85733	0.1561	downregulated	1	1.20164	0.3007	downregulated	1	1.14512	0.3182	upregulated	3	0.12879	0.8792
negative regulation of cilium assembly	GO	4 out of 8	4.06514	upregulated	2	3.31674	0.0363	downregulated	1	3.26862	0.0381	downregulated	4	4.56488	0.0104	downregulated	2	2.2349	0.107					downregulated	2	3.47251	0.031	downregulated	2	2.50204	0.0819	downregulated	3	4.84225	0.0079
magnesium ion transmembrane transport	GO	3 out of 8	4.06403	upregulated	4	8.07262	0.0003	upregulated	1	1.02771	0.3578	downregulated	2	1.97975	0.1381					upregulated	1	1.67897	0.1866	upregulated	2	1.70575	0.1816	upregulated	2	2.03293	0.131	downregulated	2	2.36109	0.0943
oocyte differentiation	GO	3 out of 8	4.0602	downregulated	1	0.566302	0.5676	downregulated	1	0.800429	0.4491	upregulated	1	5.78482	0.0031	downregulated	3	2.51066	0.0812									downregulated	2	0.266691	0.7659	downregulated	4	1.88608	0.1517
stress response to metal ion	GO	2 out of 8	4.05816					upregulated	1	4.92988	0.0072	upregulated	1	2.81888	0.0597	downregulated	1	2.32051	0.0982													upregulated	2	1.37009	0.2541
mitochondrial membrane organization	GO	5 out of 8	4.05182	downregulated	4	1.12314	0.3253	upregulated	4	0.833295	0.4346	upregulated	5	2.71964	0.0659	upregulated	1	1.24166	0.2889	upregulated	1	1.19247	0.3035	downregulated	10	1.68917	0.1847	downregulated	6	1.98266	0.1377	downregulated	5	0.620648	0.5376
RNA phosphodiester bond hydrolysis, exonucleolytic	GO	3 out of 8	4.04371	upregulated	4	2.58724	0.0752	upregulated	5	5.4251	0.0044	downregulated	4	1.08002	0.3396	downregulated	3	1.92153	0.1464	upregulated	1	0.583907	0.5577	upregulated	5	1.12773	0.3238	upregulated	6	1.24122	0.289	downregulated	2	0.905757	0.4042
phosphatidylglycerol acyl-chain remodeling	GO	5 out of 8	4.03039	upregulated	1	0.834992	0.4339	downregulated	1	1.37323	0.2533	upregulated	1	1.86356	0.1551					downregulated	1	1.07859	0.3401	downregulated	2	2.35763	0.0946	downregulated	2	1.49663	0.2239	upregulated	2	2.22779	0.1078
microtubule anchoring at microtubule organizing center	GO	4 out of 8	3.99613					upregulated	1	3.36469	0.0346	upregulated	1	1.13137	0.3226	upregulated	1	2.24876	0.1055					downregulated	1	0.426946	0.6525	upregulated	2	2.31041	0.0992	upregulated	1	0.865222	0.421
bone remodeling	GO	5 out of 8	3.98344	downregulated	1	0.558759	0.5719	upregulated	1	0.729259	0.4823	upregulated	1	1.26297	0.2828	downregulated	1	0.791785	0.453					downregulated	2	0.647119	0.5236	downregulated	3	0.865577	0.4208	downregulated	2	1.82906	0.1606
negative regulation of viral life cycle	GO	3 out of 8	3.97812	downregulated	3	1.31669	0.268	upregulated	7	7.69273	0.0005	downregulated	2	0.541584	0.5818					downregulated	1	0.318383	0.7273	upregulated	6	1.4783	0.228	upregulated	7	1.34906	0.2595	downregulated	4	0.652637	0.5207
NIK/NF-kappaB signaling	GO	3 out of 8	3.96429	upregulated	3	1.62635	0.1966	upregulated	1	2.83176	0.0589	upregulated	1	2.68256	0.0684	downregulated	3	1.81534	0.1628					upregulated	2	0.136747	0.8722	upregulated	3	0.778813	0.459	upregulated	2	0.445486	0.6405
inner ear development	GO	3 out of 8	3.94949	upregulated	9	3.29324	0.0371	downregulated	4	2.58334	0.0755	downregulated	10	3.269	0.038	downregulated	4	2.63094	0.072	upregulated	7	3.70334	0.0246	downregulated	12	3.93574	0.0195	downregulated	13	5.2038	0.0055	downregulated	5	0.996278	0.3693
CENP-A containing chromatin organization	GO	2 out of 8	3.94755	upregulated	3	2.33389	0.0969	upregulated	7	9.79667	5.6e-05	upregulated	2	1.8396	0.1589	downregulated	2	2.0697	0.1262					upregulated	2	1.51422	0.22	upregulated	3	1.45076	0.2344	upregulated	4	3.14833	0.0429
ear morphogenesis	GO	3 out of 8	3.92616	upregulated	4	1.6927	0.184	downregulated	2	1.32779	0.2651	upregulated	6	2.29647	0.1006					downregulated	5	2.01547	0.1333	upregulated	7	1.36202	0.2561	downregulated	9	2.76727	0.0628	upregulated	5	0.463232	0.6292
small nucleolar ribonucleoprotein complex	GO	3 out of 8	3.91008	upregulated	2	2.47179	0.0844	upregulated	1	0.955886	0.3845	upregulated	1	1.35157	0.2588									downregulated	1	1.2759	0.2792	downregulated	1	1.33515	0.2631	downregulated	1	1.29903	0.2728
presynaptic membrane organization	GO	5 out of 8	3.90644	upregulated	1	1.28865	0.2756					downregulated	3	7.02727	0.0009	upregulated	1	3.72436	0.0241					downregulated	2	1.84229	0.1585	downregulated	3	2.49834	0.0822	downregulated	1	1.58008	0.206
regulation of DNA biosynthetic process	GO	5 out of 8	3.88224	upregulated	8	3.51484	0.0298	upregulated	5	2.81995	0.0596	downregulated	10	6.12263	0.0022	downregulated	7	5.20503	0.0055	downregulated	6	3.27274	0.0379	downregulated	7	3.84019	0.0215	downregulated	7	2.94091	0.0528	downregulated	4	1.64122	0.1937
extrinsic component of organelle membrane	GO	4 out of 8	3.86005	upregulated	2	0.757129	0.469	downregulated	1	0.636359	0.5292	upregulated	2	1.44926	0.2347	downregulated	3	2.02804	0.1316					downregulated	1	0.411711	0.6625	upregulated	4	0.358454	0.6988	downregulated	6	4.2648	0.0141
lamin binding	GO	3 out of 8	3.82632					upregulated	2	3.58992	0.0276	downregulated	1	1.33102	0.2642	upregulated	2	4.45343	0.0116	downregulated	1	1.41986	0.2417	downregulated	1	1.49402	0.2245	downregulated	1	1.22227	0.2946	upregulated	1	0.309829	0.7336
large ribosomal subunit	GO	6 out of 8	3.81642	upregulated	10	3.6448	0.0261	upregulated	5	1.0564	0.3477	upregulated	3	0.761765	0.4668	upregulated	1	0.604979	0.5461	downregulated	1	0.0178339	0.9823	downregulated	9	0.791237	0.4533	upregulated	9	0.0994645	0.9053	upregulated	16	2.96113	0.0518
negative regulation of oxidative stress-induced cell death	GO	5 out of 8	3.81552	upregulated	4	2.53283	0.0794	upregulated	2	3.59938	0.0273	downregulated	4	3.21633	0.0401	downregulated	2	1.81664	0.1626	downregulated	2	1.19551	0.3025	downregulated	3	0.680191	0.5065	downregulated	4	0.891096	0.4102	upregulated	1	0.0505074	0.9507
negative regulation of cellular response to oxidative stress	GO	5 out of 8	3.81552	upregulated	4	2.53283	0.0794	upregulated	2	3.59938	0.0273	downregulated	4	3.21633	0.0401	downregulated	2	1.81664	0.1626	downregulated	2	1.19551	0.3025	downregulated	3	0.680191	0.5065	downregulated	4	0.891096	0.4102	upregulated	1	0.0505074	0.9507
muscle cell fate commitment	GO	1 out of 8	3.79823	upregulated	1	4.45979	0.0116					downregulated	1	0.661563	0.516
lymph vessel morphogenesis	GO	4 out of 8	3.7503	downregulated	2	5.19265	0.0056	downregulated	2	2.75498	0.0636	upregulated	2	4.84304	0.0079					downregulated	2	2.23226	0.1073	downregulated	2	2.70778	0.0667	downregulated	2	2.64872	0.0707	downregulated	1	1.97389	0.1389
intramolecular oxidoreductase activity, transposing C=C bonds	GO	2 out of 8	3.7382									upregulated	1	1.96962	0.1395	upregulated	1	2.74587	0.0642									upregulated	1	0.977301	0.3763
folic acid binding	GO	2 out of 8	3.73658	downregulated	1	1.24593	0.2877	upregulated	2	7.47718	0.0006	downregulated	2	1.37255	0.2535													downregulated	2	2.46799	0.0848	downregulated	1	1.26859	0.2812
regulation of systemic arterial blood pressure by hormone	GO	3 out of 8	3.71476	downregulated	1	0.668332	0.5126	upregulated	1	0.589126	0.5548	upregulated	2	2.12102	0.1199	upregulated	2	3.60194	0.0273					downregulated	3	1.61248	0.1994	downregulated	2	1.37128	0.2538	downregulated	1	0.730992	0.4814
energy homeostasis	GO	4 out of 8	3.67492	upregulated	3	3.33527	0.0356	downregulated	2	4.84735	0.0078	downregulated	2	1.04884	0.3503					downregulated	3	5.65856	0.0035	downregulated	4	4.07456	0.017	upregulated	6	4.56339	0.0104	downregulated	2	1.06612	0.3443
regulation of viral life cycle	GO	2 out of 8	3.66512	downregulated	6	2.05323	0.1283	upregulated	11	8.79286	0.0002	downregulated	5	1.18592	0.3055	downregulated	1	0.731881	0.481	downregulated	2	0.356616	0.7	upregulated	9	0.475366	0.6217	upregulated	10	0.485091	0.6156	upregulated	10	0.552872	0.5753
positive regulation of flagellated sperm motility	GO	2 out of 8	3.66145									upregulated	1	2.22567	0.108									downregulated	1	1.43578	0.2379
epiboly	GO	6 out of 8	3.62723	upregulated	1	2.44657	0.0866	upregulated	2	1.307	0.2706	upregulated	1	1.81131	0.1634	downregulated	1	3.30451	0.0367					downregulated	1	0.358678	0.6986	downregulated	2	0.610168	0.5433	downregulated	1	0.398022	0.6716
one-carbon metabolic process	GO	1 out of 8	3.62474					upregulated	2	5.52658	0.004	downregulated	3	1.17936	0.3075	downregulated	1	0.590842	0.5539					upregulated	1	0.131632	0.8767	upregulated	1	0.531227	0.5879	upregulated	2	2.11415	0.1207
negative regulation of mRNA catabolic process	GO	3 out of 8	3.59941	upregulated	7	5.25436	0.0052	upregulated	1	0.818303	0.4412	downregulated	4	0.927746	0.3954	upregulated	1	1.1466	0.3177	upregulated	1	0.579609	0.5601	downregulated	3	0.540688	0.5823	upregulated	5	1.06356	0.3452	upregulated	3	0.771321	0.4624
endothelial cell proliferation	GO	3 out of 8	3.56434	upregulated	1	0.539557	0.583	upregulated	1	1.11652	0.3274	downregulated	2	1.31179	0.2693					downregulated	1	1.0602	0.3464	downregulated	1	1.02262	0.3597	downregulated	2	1.48151	0.2273
positive regulation of amyloid-beta formation	GO	2 out of 8	3.54576													downregulated	1	1.43853	0.2373	downregulated	1	2.46033	0.0854	downregulated	1	2.52396	0.0801
negative regulation of chromosome organization	GO	3 out of 8	3.51003	upregulated	11	5.07564	0.0062	upregulated	6	2.63209	0.0719	downregulated	8	1.15026	0.3166	downregulated	7	2.52493	0.0801	downregulated	2	0.147917	0.8625	upregulated	6	0.084866	0.9186	upregulated	13	0.464865	0.6282	upregulated	9	0.120693	0.8863
proteasome core complex	GO	3 out of 8	3.49914					upregulated	1	1.72729	0.1778	downregulated	3	2.10368	0.122	downregulated	2	2.16569	0.1147	downregulated	1	1.39845	0.247	downregulated	1	1.68875	0.1847	downregulated	1	1.06008	0.3464	upregulated	2	0.64814	0.523
respiratory chain complex IV	GO	3 out of 8	3.49124					upregulated	1	1.03225	0.3562									downregulated	1	1.5525	0.2117	downregulated	2	1.96121	0.1407					upregulated	1	1.05471	0.3483
histone demethylase activity	GO	3 out of 8	3.48009	downregulated	1	1.50377	0.2223	downregulated	1	1.33892	0.2621	upregulated	1	1.39201	0.2486	upregulated	2	4.69138	0.0092					upregulated	2	0.1321	0.8763	upregulated	3	0.524085	0.5921	downregulated	2	0.895575	0.4084
epithelial cell apoptotic process	GO	4 out of 8	3.47917					downregulated	1	3.75757	0.0233	downregulated	4	2.01901	0.1328	downregulated	2	1.62458	0.197	downregulated	3	2.39412	0.0913	downregulated	3	2.52895	0.0797	downregulated	4	4.42727	0.0119	downregulated	1	1.52999	0.2165
phospholipase inhibitor activity	GO	2 out of 8	3.44743	upregulated	1	1.638	0.1944													downregulated	1	1.77605	0.1693	downregulated	1	1.67138	0.188
cellular response to increased oxygen levels	GO	1 out of 8	3.42815					upregulated	1	3.42815	0.0324
demethylase activity	GO	3 out of 8	3.35336	downregulated	1	1.24092	0.2891	downregulated	1	1.2007	0.301	upregulated	1	1.25235	0.2858	upregulated	2	4.37885	0.0125					upregulated	2	0.0749334	0.9278	upregulated	3	0.324767	0.7227	downregulated	2	0.563488	0.5692
calcium channel regulator activity	GO	3 out of 8	3.32662	upregulated	5	6.83381	0.0011	upregulated	2	3.41807	0.0328	downregulated	3	0.730145	0.4818					upregulated	1	0.573382	0.5636	downregulated	5	1.73531	0.1763	downregulated	2	0.858944	0.4236	downregulated	2	1.30575	0.271
translation initiation factor binding	GO	5 out of 8	3.28673					upregulated	2	1.00863	0.3647	downregulated	1	0.0953986	0.909					downregulated	1	0.502674	0.6049	downregulated	1	0.461756	0.6302	downregulated	1	0.768837	0.4636	downregulated	1	0.640233	0.5272
positive regulation of response to drug	GO	3 out of 8	3.2437	upregulated	1	3.59456	0.0275					downregulated	3	2.56182	0.0772	downregulated	2	2.34141	0.0962	downregulated	1	2.16833	0.1144	upregulated	1	2.28096	0.1022	downregulated	3	2.2127	0.1094	downregulated	3	2.38404	0.0922
positive regulation by host of viral process	GO	2 out of 8	3.24259					upregulated	3	6.19866	0.002									upregulated	1	1.14331	0.3188	upregulated	1	0.595679	0.5512	downregulated	1	0.428188	0.6517	upregulated	1	1.64527	0.193
regulation of cellular response to insulin stimulus	GO	4 out of 8	3.24051	downregulated	6	5.91985	0.0027	downregulated	1	0.248565	0.7799	upregulated	1	0.118467	0.8883					downregulated	4	4.28734	0.0137	downregulated	4	3.26994	0.038	downregulated	3	2.93199	0.0533	upregulated	4	1.19882	0.3015
sperm head	GO	2 out of 8	3.22674									upregulated	1	1.74857	0.174									downregulated	2	2.13643	0.1181					upregulated	1	0.658255	0.5178
ATP hydrolysis coupled cation transmembrane transport	GO	5 out of 8	3.21582	downregulated	1	0.323325	0.7237					upregulated	2	0.746013	0.4743					downregulated	2	0.649496	0.5223	downregulated	4	1.07397	0.3417	downregulated	4	1.05792	0.3472	downregulated	1	0.0117431	0.9883
regulation of cell maturation	GO	4 out of 8	3.19011	downregulated	1	1.15344	0.3155	upregulated	1	3.79504	0.0225	downregulated	2	1.42573	0.2403					downregulated	1	1.0122	0.3634	downregulated	1	0.691562	0.5008	downregulated	1	0.270473	0.763
mitochondrial intermembrane space	GO	3 out of 8	3.1662	upregulated	5	1.48119	0.2274	upregulated	3	2.25063	0.1053	downregulated	6	3.06148	0.0468	downregulated	3	2.30713	0.0995	downregulated	4	1.7978	0.1657	downregulated	8	1.65188	0.1917	downregulated	3	0.16396	0.8488	upregulated	5	0.447444	0.6393
maintenance of protein location in cell	GO	6 out of 8	3.15998	upregulated	5	3.44691	0.0318	upregulated	6	6.90128	0.001	downregulated	11	5.8569	0.0029	downregulated	6	6.00848	0.0025	downregulated	3	1.52357	0.2179	downregulated	5	1.67611	0.1871	downregulated	4	0.936888	0.3918	downregulated	2	0.540607	0.5824
spermatid development	GO	5 out of 8	3.11788	upregulated	9	2.80964	0.0602	upregulated	5	1.39982	0.2466	upregulated	6	3.36647	0.0345	downregulated	7	3.1313	0.0437	upregulated	2	1.91816	0.1469	downregulated	6	1.16581	0.3117	upregulated	14	1.47509	0.2288	downregulated	10	0.900683	0.4063
hydrolase activity, acting on carbon-nitrogen (but not peptide) bonds	GO	3 out of 8	3.07767	upregulated	7	3.66738	0.0255	upregulated	7	3.68171	0.0252	downregulated	13	3.33056	0.0358	downregulated	5	1.87621	0.1532	upregulated	3	0.822101	0.4395	upregulated	8	0.379826	0.684	upregulated	12	0.660943	0.5164	downregulated	10	2.79822	0.0609
amine biosynthetic process	GO	3 out of 8	3.0563					upregulated	1	0.730734	0.4816	upregulated	2	3.21722	0.0401	downregulated	1	0.899554	0.4068					upregulated	1	0.273592	0.7606	downregulated	1	0.281493	0.7547
negative regulation of endoplasmic reticulum unfolded protein response	GO	2 out of 8	3.0272					upregulated	1	1.10346	0.3317	upregulated	2	3.86668	0.0209	downregulated	1	1.16589	0.3116									upregulated	1	0.365296	0.694	upregulated	1	0.411755	0.6625
beta-catenin-TCF complex assembly	GO	5 out of 8	3.02191	downregulated	2	1.61251	0.1994	upregulated	1	0.445951	0.6402	upregulated	2	1.72885	0.1775	upregulated	1	2.08721	0.124	downregulated	1	0.552116	0.5757	upregulated	4	1.01566	0.3622	upregulated	4	0.924066	0.3969	downregulated	4	1.76002	0.172
intra-Golgi vesicle-mediated transport	GO	6 out of 8	3.00813	upregulated	2	1.68332	0.1858	upregulated	1	0.304474	0.7375	downregulated	3	2.36182	0.0942	downregulated	1	1.153	0.3157	downregulated	1	0.386132	0.6797	downregulated	5	2.0892	0.1238	downregulated	2	0.993697	0.3702	downregulated	2	1.06612	0.3443
preribosome	GO	5 out of 8	3.0008	upregulated	2	0.371569	0.6897	upregulated	4	2.63338	0.0718									downregulated	1	0.109379	0.8964	downregulated	5	1.02341	0.3594	downregulated	5	0.436339	0.6464	downregulated	4	1.0601	0.3464
Wnt signalosome	GO	3 out of 8	2.9999																	downregulated	1	1.30228	0.2719	downregulated	2	3.52463	0.0295	upregulated	2	2.69727	0.0674	downregulated	1	0.870252	0.4188
meiosis I	GO	5 out of 8	2.97341	upregulated	4	0.798448	0.45	upregulated	8	4.37802	0.0126	downregulated	6	1.7614	0.1718	downregulated	4	1.57158	0.2077	downregulated	2	0.604256	0.5465	downregulated	2	0.285489	0.7516	downregulated	5	0.624015	0.5358	upregulated	2	0.383834	0.6812
protein disulfide oxidoreductase activity	GO	3 out of 8	2.94948									upregulated	1	0.860062	0.4231									downregulated	2	1.1905	0.3041	upregulated	1	0.39611	0.6729	downregulated	1	1.29503	0.2739
regulation of protein targeting to mitochondrion	GO	4 out of 8	2.9307	upregulated	3	2.23012	0.1075					upregulated	1	0.742565	0.4759	downregulated	2	0.788117	0.4547	downregulated	2	1.03369	0.3557	downregulated	4	2.07214	0.1259	upregulated	4	1.154	0.3154	upregulated	4	1.20569	0.2995
protein transmembrane import into intracellular organelle	GO	4 out of 8	2.88492	upregulated	1	0.737647	0.4782	upregulated	1	1.0139	0.3628	upregulated	1	1.27296	0.28									downregulated	4	1.65988	0.1902	upregulated	1	0.737166	0.4785	downregulated	2	0.597572	0.5501
negative regulation of muscle tissue development	GO	4 out of 8	2.87069	upregulated	3	3.05679	0.047					downregulated	6	7.79238	0.0004	upregulated	1	2.31403	0.0989	downregulated	2	1.60474	0.2009	downregulated	3	2.57885	0.0759	downregulated	2	2.7134	0.0663	downregulated	3	1.81052	0.1636
ER membrane protein complex	GO	3 out of 8	2.85872					upregulated	1	1.4387	0.2372	upregulated	1	1.49302	0.2247									downregulated	1	0.930746	0.3943	upregulated	1	0.438257	0.6452	upregulated	1	0.565499	0.5681
positive regulation of viral life cycle	GO	5 out of 8	2.85577	upregulated	2	0.265434	0.7669	upregulated	5	4.3092	0.0134	downregulated	3	1.4157	0.2428	downregulated	1	1.29834	0.273	downregulated	1	0.368986	0.6914	downregulated	4	0.658906	0.5174	downregulated	3	0.649254	0.5224	upregulated	5	0.681965	0.5056
phosphatidylinositol phosphate phosphatase activity	GO	4 out of 8	2.83141	upregulated	4	2.31942	0.0983	downregulated	1	0.783275	0.4569	downregulated	3	2.53292	0.0794	upregulated	1	2.72501	0.0655	downregulated	1	1.11222	0.3288	downregulated	1	1.19827	0.3017	upregulated	1	0.0732549	0.9294	upregulated	4	1.13407	0.3217
aminoacyl-tRNA synthetase multienzyme complex	GO	1 out of 8	2.82994					upregulated	2	3.48906	0.0305	downregulated	1	0.65912	0.5173
ribonucleoprotein complex binding	GO	4 out of 8	2.80308	upregulated	4	0.166067	0.847	upregulated	6	2.3094	0.0993	upregulated	8	5.30198	0.005	upregulated	2	2.47047	0.0845	upregulated	1	0.454432	0.6348	upregulated	8	0.930962	0.3942	upregulated	13	2.46667	0.0849	upregulated	14	3.59277	0.0275
Wnt-protein binding	GO	4 out of 8	2.79214	upregulated	2	3.9656	0.019					upregulated	1	1.31438	0.2686	upregulated	1	3.49592	0.0303	downregulated	1	0.517954	0.5957	upregulated	4	2.92153	0.0539	upregulated	2	2.37757	0.0928	upregulated	3	1.20262	0.3004
carbon-sulfur lyase activity	GO	5 out of 8	2.79177	upregulated	1	1.4611	0.232	upregulated	1	1.286	0.2764	downregulated	1	4.33488	0.0131	downregulated	1	5.24738	0.0053					downregulated	2	3.4532	0.0316	downregulated	2	3.55211	0.0287	downregulated	1	2.62161	0.0727
positive regulation of blood circulation	GO	4 out of 8	2.76703	upregulated	1	2.48568	0.0833	upregulated	2	4.49446	0.0112	upregulated	4	3.30537	0.0367	downregulated	4	2.24137	0.1063	upregulated	1	1.18613	0.3054	upregulated	2	2.40835	0.09	downregulated	5	0.808935	0.4453	upregulated	4	2.49156	0.0828
TRIF-dependent toll-like receptor signaling pathway	GO	1 out of 8	2.76672					upregulated	3	7.6212	0.0005	downregulated	2	1.63946	0.1941	downregulated	2	2.36467	0.094					upregulated	1	0.737367	0.4784	upregulated	1	0.112983	0.8932	upregulated	1	0.353157	0.7025
dendritic cell differentiation	GO	6 out of 8	2.74017	upregulated	1	1.29536	0.2738	upregulated	1	0.636653	0.5291	downregulated	6	9.18136	0.0001	downregulated	3	4.63861	0.0097	downregulated	1	4.11648	0.0163	downregulated	2	3.85065	0.0213	downregulated	1	4.28231	0.0138	downregulated	1	2.37868	0.0927
regulation of protein localization to cell surface	GO	5 out of 8	2.73973	downregulated	1	0.958782	0.3834	downregulated	1	2.13907	0.1178	upregulated	1	0.319429	0.7266	upregulated	1	2.16461	0.1148	downregulated	1	2.16135	0.1152	downregulated	1	1.44779	0.2351	downregulated	1	1.2504	0.2864	upregulated	4	1.50601	0.2218
blood vessel remodeling	GO	3 out of 8	2.73712	upregulated	4	6.05405	0.0023	upregulated	1	0.810341	0.4447	downregulated	2	1.77146	0.1701	downregulated	1	0.919101	0.3989	downregulated	1	0.755808	0.4696	downregulated	2	1.001	0.3675	downregulated	3	1.41045	0.244	upregulated	1	0.430137	0.6504
L-ascorbic acid binding	GO	4 out of 8	2.72545	downregulated	1	2.08746	0.124	upregulated	3	4.04768	0.0175	downregulated	1	1.27427	0.2796	downregulated	1	0.889479	0.4109					downregulated	1	0.309829	0.7336	downregulated	2	0.936863	0.3919	downregulated	2	1.68228	0.1859
structural constituent of myelin sheath	GO	4 out of 8	2.72252	downregulated	2	5.99192	0.0025					downregulated	4	7.60662	0.0005					downregulated	1	4.6763	0.0093	downregulated	1	6.23092	0.002	downregulated	1	4.62524	0.0098	downregulated	1	0.788606	0.4545
positive regulation of protein acetylation	GO	4 out of 8	2.72228	downregulated	1	2.00947	0.1341	upregulated	3	3.0957	0.0452	upregulated	1	0.488267	0.6137					downregulated	2	1.41288	0.2434	downregulated	2	2.18168	0.1129	downregulated	2	2.00787	0.1343	upregulated	5	3.04176	0.0478
structural constituent of epidermis	GO	1 out of 8	2.71447													upregulated	1	2.71447	0.0662
positive regulation of acrosome reaction	GO	1 out of 8	2.694													upregulated	1	2.694	0.0676
neurotransmitter receptor internalization	GO	3 out of 8	2.69296									downregulated	3	3.65064	0.026	downregulated	2	3.14934	0.0429					downregulated	2	2.22503	0.1081	downregulated	3	3.57891	0.0279	downregulated	2	3.689	0.025
peptide hormone binding	GO	4 out of 8	2.68334	upregulated	2	2.83339	0.0588	upregulated	2	2.9996	0.0498	upregulated	3	2.07625	0.1254	upregulated	3	6.17398	0.0021	upregulated	1	2.06494	0.1268	upregulated	4	1.52989	0.2166	upregulated	5	2.83962	0.0584	upregulated	5	4.96542	0.007
dopamine binding	GO	1 out of 8	2.6608									upregulated	1	2.6608	0.0699
positive regulation of gonad development	GO	1 out of 8	2.64586	upregulated	1	2.64586	0.0709
regulation of actomyosin structure organization	GO	3 out of 8	2.62147	upregulated	9	7.64507	0.0005	downregulated	1	3.03116	0.0483	downregulated	9	4.15693	0.0157	downregulated	2	0.893062	0.4094	downregulated	5	4.54532	0.0106	downregulated	7	2.85138	0.0578	upregulated	12	3.22089	0.0399	upregulated	7	1.11825	0.3269
calcium-mediated signaling using intracellular calcium source	GO	2 out of 8	2.61909					downregulated	1	4.48865	0.0112	upregulated	3	6.43621	0.0016													downregulated	1	0.671531	0.5109
response to muscle stretch	GO	4 out of 8	2.61592					downregulated	2	5.15206	0.0058	downregulated	3	1.56672	0.2087	downregulated	2	3.44854	0.0318	downregulated	2	2.66376	0.0697	downregulated	2	3.0102	0.0493	downregulated	3	4.07911	0.0169	downregulated	3	3.03016	0.0483
serine/threonine protein kinase complex	GO	3 out of 8	2.60337	upregulated	6	2.08075	0.1248	upregulated	4	5.40323	0.0045	upregulated	3	1.2238	0.2941	downregulated	5	1.549	0.2125	upregulated	2	0.935856	0.3922	upregulated	6	1.20333	0.3002	upregulated	12	1.39784	0.2471	upregulated	8	1.01839	0.3612
regulation of flagellated sperm motility	GO	2 out of 8	2.60177									upregulated	1	1.7077	0.1813									downregulated	1	0.894071	0.409
thiolester hydrolase activity	GO	5 out of 8	2.59852	upregulated	2	1.29163	0.2748	upregulated	1	0.964281	0.3813	downregulated	2	1.73878	0.1757					downregulated	2	1.61058	0.1998	downregulated	3	1.26254	0.2829	downregulated	2	1.54078	0.2142	upregulated	3	2.33251	0.0971
positive regulation of cell cycle G2/M phase transition	GO	5 out of 8	2.59327	upregulated	2	1.24734	0.2873	upregulated	2	1.31424	0.2687	downregulated	3	1.42368	0.2408					downregulated	1	0.429602	0.6508	downregulated	2	1.16174	0.3129	downregulated	2	0.759421	0.4679	upregulated	3	0.895407	0.4084
toxin metabolic process	GO	2 out of 8	2.50194	upregulated	2	2.24707	0.1057	upregulated	1	1.07838	0.3401	downregulated	1	0.823507	0.4389
mitochondrial transport	GO	4 out of 8	2.4825	downregulated	5	0.822797	0.4392	downregulated	3	0.704532	0.4943	downregulated	11	2.23976	0.1065	upregulated	1	0.909094	0.4029	downregulated	5	1.3796	0.2517	downregulated	17	3.506	0.03	downregulated	9	1.60275	0.2013	upregulated	12	1.14786	0.3173
MHC class I protein complex	GO	2 out of 8	2.47714					upregulated	1	0.710201	0.4915	downregulated	2	1.76627	0.171	upregulated	1	3.53321	0.0292
ciliary transition zone	GO	4 out of 8	2.4699	upregulated	8	4.22209	0.0147	downregulated	1	1.12728	0.3239	upregulated	2	0.637738	0.5285	upregulated	1	0.94213	0.3898	downregulated	1	0.34909	0.7053	upregulated	3	0.263354	0.7685	upregulated	7	1.00721	0.3652	upregulated	6	1.28331	0.2771
cerebellum development	GO	3 out of 8	2.46205	upregulated	4	2.36793	0.0937	upregulated	5	2.56118	0.0772	downregulated	8	3.5035	0.0301	downregulated	2	0.354396	0.7016	downregulated	4	1.93311	0.1447	upregulated	6	3.21517	0.0401	upregulated	9	2.12264	0.1197	downregulated	6	3.51348	0.0298
RNAi effector complex	GO	5 out of 8	2.46104					upregulated	1	1.52519	0.2176	downregulated	3	2.02024	0.1326	downregulated	3	3.76491	0.0232	downregulated	1	1.00051	0.3677	downregulated	1	0.946791	0.388	downregulated	1	1.32935	0.2646	downregulated	3	3.44435	0.0319
folic acid-containing compound metabolic process	GO	2 out of 8	2.45793	downregulated	1	0.529861	0.5887	upregulated	3	5.3727	0.0046	downregulated	5	2.83736	0.0586	downregulated	1	0.497778	0.6079					upregulated	1	0.0705625	0.9319	downregulated	2	1.02079	0.3603	upregulated	3	1.79108	0.1668
intraciliary transport involved in cilium assembly	GO	3 out of 8	2.45456	upregulated	1	1.84576	0.1579	upregulated	4	4.29401	0.0137	upregulated	2	4.11796	0.0163									upregulated	2	1.32896	0.2648	upregulated	7	3.16155	0.0424	upregulated	4	3.31266	0.0364
ESCRT complex disassembly	GO	3 out of 8	2.43723					upregulated	1	1.40026	0.2465					downregulated	1	1.51241	0.2204	downregulated	1	1.67474	0.1874	downregulated	1	0.874652	0.417
ESCRT III complex disassembly	GO	3 out of 8	2.43723					upregulated	1	1.40026	0.2465					downregulated	1	1.51241	0.2204	downregulated	1	1.67474	0.1874	downregulated	1	0.874652	0.417
semaphorin-plexin signaling pathway involved in neuron projection guidance	GO	3 out of 8	2.42949	downregulated	1	2.3986	0.0908					downregulated	3	2.03235	0.131									downregulated	2	1.40811	0.2446	downregulated	2	1.44513	0.2357	downregulated	3	4.00719	0.0182
regulation of neuromuscular junction development	GO	1 out of 8	2.42014					upregulated	1	2.42014	0.0889
response to ionizing radiation	GO	3 out of 8	2.41137	upregulated	8	1.64694	0.1926	upregulated	14	7.04937	0.0009	upregulated	8	4.23884	0.0144	downregulated	4	0.548975	0.5775	upregulated	3	1.63528	0.1949	upregulated	8	2.8881	0.0557	upregulated	13	3.53188	0.0292	upregulated	12	1.91954	0.1467
cellular glucose homeostasis	GO	3 out of 8	2.38989	downregulated	1	4.96959	0.0069	upregulated	2	2.05999	0.1275	upregulated	3	1.10719	0.3305	downregulated	1	0.495454	0.6093	downregulated	3	1.34522	0.2605	downregulated	4	1.38483	0.2504	downregulated	5	1.50494	0.222	upregulated	8	1.84509	0.158
ATP hydrolysis coupled transmembrane transport	GO	6 out of 8	2.38783	downregulated	2	1.22149	0.2948	upregulated	1	0.110595	0.8953	upregulated	2	0.724206	0.4847					downregulated	2	0.644113	0.5251	downregulated	4	1.06755	0.3439	downregulated	4	1.05153	0.3494	downregulated	1	0.0113295	0.9887
ATP hydrolysis coupled ion transmembrane transport	GO	6 out of 8	2.38783	downregulated	2	1.22149	0.2948	upregulated	1	0.110595	0.8953	upregulated	2	0.724206	0.4847					downregulated	2	0.644113	0.5251	downregulated	4	1.06755	0.3439	downregulated	4	1.05153	0.3494	downregulated	1	0.0113295	0.9887
ciliary base	GO	2 out of 8	2.3784	upregulated	3	2.51867	0.0806	upregulated	2	4.11644	0.0163	downregulated	1	0.158041	0.8538	downregulated	1	0.606264	0.5454	upregulated	2	3.55387	0.0286	upregulated	3	1.90399	0.149	upregulated	3	1.83084	0.1603	upregulated	2	1.66156	0.1898
lipoprotein biosynthetic process	GO	4 out of 8	2.36189	upregulated	8	6.35099	0.0017	upregulated	4	1.84038	0.1588	downregulated	4	2.10605	0.1217	downregulated	5	1.87599	0.1532	downregulated	3	0.515901	0.597	downregulated	5	0.696534	0.4983	upregulated	8	1.13825	0.3204	upregulated	9	1.92164	0.1464
neurotransmitter:sodium symporter activity	GO	3 out of 8	2.30328	upregulated	2	5.30702	0.005					upregulated	1	7.09367	0.0008					upregulated	1	1.77734	0.1691	downregulated	3	1.27238	0.2802	downregulated	4	2.23552	0.1069	downregulated	1	0.572721	0.564
respiratory chain complex III	GO	3 out of 8	2.26057																	downregulated	1	1.59068	0.2038	downregulated	1	1.35425	0.2581	downregulated	1	0.774507	0.4609	upregulated	1	1.45886	0.2325
protein N-terminus binding	GO	5 out of 8	2.2531	upregulated	6	2.37348	0.0932	upregulated	7	4.18569	0.0152	downregulated	12	3.7063	0.0246	downregulated	7	3.44975	0.0318	downregulated	6	1.80488	0.1645	downregulated	6	1.07018	0.3429	downregulated	3	1.8217	0.1617	upregulated	12	1.84678	0.1577
connexin complex	GO	2 out of 8	2.24835	downregulated	1	1.46743	0.2305	upregulated	1	5.01384	0.0066	downregulated	1	0.767028	0.4644	downregulated	1	2.80958	0.0602					upregulated	1	1.45388	0.2337	downregulated	3	2.88726	0.0557	downregulated	1	0.814967	0.4427
microtubule-based transport	GO	4 out of 8	2.24555	upregulated	9	2.67143	0.0692	upregulated	9	3.17859	0.0416	upregulated	4	1.87877	0.1528	downregulated	4	0.748672	0.473	downregulated	5	0.807909	0.4458	upregulated	15	2.31573	0.0987	upregulated	22	3.15745	0.0425	downregulated	8	2.60213	0.0741
negative regulation of viral process	GO	2 out of 8	2.23718	downregulated	4	1.82683	0.1609	upregulated	7	6.86903	0.001	upregulated	1	0.483068	0.6169	downregulated	1	0.285614	0.7516	downregulated	1	0.225833	0.7979	upregulated	7	1.28751	0.276	upregulated	8	1.00673	0.3654	upregulated	5	0.451007	0.637
chromosome separation	GO	3 out of 8	2.22855					upregulated	1	0.989949	0.3716	downregulated	3	1.331	0.2642	upregulated	1	1.69611	0.1834									upregulated	2	0.460017	0.6313	downregulated	1	1.33351	0.2636
proton-transporting two-sector ATPase complex, catalytic domain	GO	2 out of 8	2.21183																	downregulated	1	1.25524	0.285	downregulated	1	0.956596	0.3842
RNA phosphodiester bond hydrolysis, endonucleolytic	GO	3 out of 8	2.21134	upregulated	3	1.36276	0.256	upregulated	8	12.3579	4.3e-06	downregulated	6	5.22201	0.0054	downregulated	4	5.59698	0.0037					downregulated	2	0.0519654	0.9494	upregulated	3	0.0535325	0.9479	upregulated	3	0.688732	0.5022
metencephalon development	GO	3 out of 8	2.19512	upregulated	4	2.29332	0.1009	upregulated	5	2.29257	0.101	downregulated	8	3.25999	0.0384	downregulated	2	0.298959	0.7416	downregulated	4	1.72418	0.1783	upregulated	6	3.1274	0.0438	upregulated	9	2.0388	0.1302	downregulated	6	3.20698	0.0405
regulation of endocytosis	GO	6 out of 8	2.19187	upregulated	12	1.69317	0.1839	upregulated	9	2.87494	0.0564	downregulated	25	9.86619	5.2e-05	downregulated	19	13.3627	1.6e-06	downregulated	10	3.42112	0.0327	downregulated	24	6.00096	0.0025	downregulated	23	5.25169	0.0052	downregulated	16	6.1789	0.0021
ligase activity	GO	4 out of 8	2.18298	downregulated	5	1.87567	0.1533	upregulated	8	2.81901	0.0597	upregulated	9	5.09494	0.0061	downregulated	4	1.65159	0.1917	downregulated	1	0.253749	0.7759	upregulated	9	0.225588	0.798	downregulated	8	0.352116	0.7032	upregulated	9	2.58398	0.0755
nuclear pore central transport channel	GO	1 out of 8	2.17145					upregulated	1	2.17145	0.114
negative regulation of protein acetylation	GO	4 out of 8	2.16582	downregulated	1	3.26551	0.0382					upregulated	1	1.91042	0.148	downregulated	1	0.507299	0.6021	downregulated	1	1.0602	0.3464	downregulated	2	2.36184	0.0942	downregulated	2	1.54792	0.2127	upregulated	3	0.941744	0.3899
chaperone complex	GO	1 out of 8	2.16117					upregulated	1	2.34827	0.0955																	upregulated	1	0.187102	0.8294
modulation by host of viral process	GO	2 out of 8	2.12998					upregulated	3	4.86632	0.0077									upregulated	1	0.950589	0.3865	upregulated	1	0.447338	0.6393	downregulated	1	0.302726	0.7388	upregulated	2	1.64114	0.1938
phosphatidylcholine acyl-chain remodeling	GO	3 out of 8	2.12121					downregulated	1	1.05205	0.3492	downregulated	1	1.13054	0.3229	downregulated	1	0.721344	0.4861	downregulated	1	0.760261	0.4675	upregulated	2	0.848139	0.4282	downregulated	3	1.89036	0.151	downregulated	3	2.17061	0.1141
Flemming body	GO	3 out of 8	2.11525	upregulated	3	2.72405	0.0656	upregulated	3	3.1425	0.0432	downregulated	2	1.41725	0.2424	downregulated	2	1.89468	0.1504					downregulated	1	0.574994	0.5627	downregulated	1	0.555089	0.574	upregulated	3	1.01437	0.3626
nucleoside metabolic process	GO	4 out of 8	2.10628	upregulated	9	3.52378	0.0295	upregulated	6	1.94658	0.1428	downregulated	8	1.48048	0.2275	upregulated	2	1.30606	0.2709	downregulated	3	0.819795	0.4405	downregulated	7	1.2144	0.2969	downregulated	5	1.20274	0.3004	upregulated	13	4.00946	0.0181
glutathione derivative biosynthetic process	GO	3 out of 8	2.0971	upregulated	2	2.62671	0.0723	upregulated	1	0.944496	0.3889					upregulated	1	2.17699	0.1134					upregulated	1	1.0903	0.3361	upregulated	1	1.04622	0.3513	upregulated	1	1.51456	0.2199
peptidyl-threonine dephosphorylation	GO	4 out of 8	2.0725	upregulated	1	1.27283	0.28					downregulated	2	3.73156	0.024	downregulated	2	3.66808	0.0255	downregulated	2	3.52866	0.0293	downregulated	2	2.60692	0.0738	downregulated	1	2.06372	0.127
ligase activity, forming carbon-nitrogen bonds	GO	4 out of 8	2.04445	downregulated	1	0.398659	0.6712	upregulated	4	2.98091	0.0507	upregulated	3	2.77131	0.0626	downregulated	2	2.62612	0.0724					downregulated	2	0.120463	0.8865	downregulated	2	0.425796	0.6532	upregulated	4	1.22925	0.2925
regulation of vascular endothelial growth factor signaling pathway	GO	3 out of 8	2.01572									downregulated	2	4.24305	0.0144					upregulated	2	4.70496	0.0091	downregulated	3	4.10168	0.0165	downregulated	3	4.74347	0.0087	downregulated	1	2.11859	0.1202
phosphoprotein binding	GO	5 out of 8	1.99586	upregulated	6	3.74344	0.0237	upregulated	1	0.248619	0.7799	downregulated	11	8.07428	0.0003	downregulated	6	7.25717	0.0007	downregulated	5	3.22979	0.0396	downregulated	9	4.76677	0.0085	downregulated	7	4.36382	0.0127	downregulated	2	4.71831	0.0089
unfolded protein binding	GO	4 out of 8	1.99511	upregulated	5	1.50343	0.2224	upregulated	3	1.93852	0.1439	downregulated	6	0.851469	0.4268	downregulated	2	0.355616	0.7007	downregulated	2	0.25744	0.773	downregulated	5	0.280707	0.7552	upregulated	7	0.19119	0.826	upregulated	10	0.586707	0.5562
oxidoreductase complex	GO	5 out of 8	1.98864	upregulated	5	1.29046	0.2751	downregulated	2	1.98668	0.1372	downregulated	6	2.27157	0.1032	downregulated	3	3.00511	0.0495	downregulated	4	1.35437	0.2581	downregulated	12	4.27203	0.014	downregulated	7	0.607492	0.5447	downregulated	3	1.72765	0.1777
hydrolase activity, acting on carbon-nitrogen (but not peptide) bonds, in linear amides	GO	2 out of 8	1.93257	upregulated	7	5.77389	0.0031	upregulated	5	4.08775	0.0168	downregulated	9	3.74054	0.0237	downregulated	4	2.18265	0.1127	upregulated	3	1.37781	0.2521	upregulated	6	0.943968	0.3891	upregulated	9	1.37483	0.2529	upregulated	4	0.491923	0.6114
organelle inheritance	GO	2 out of 8	1.93131					upregulated	1	1.25154	0.2861																					downregulated	1	0.679774	0.5067
regulation of cellular response to oxidative stress	GO	4 out of 8	1.92567	downregulated	5	3.08298	0.0458	upregulated	4	6.88209	0.001	downregulated	5	2.52191	0.0803	downregulated	2	1.26165	0.2832	downregulated	3	2.17661	0.1134	downregulated	6	2.053	0.1283	upregulated	3	3.75509	0.0234	downregulated	3	1.4356	0.238
mitotic chromosome condensation	GO	3 out of 8	1.92395	upregulated	1	0.79293	0.4525	upregulated	2	3.42924	0.0324	downregulated	3	2.45105	0.0862													upregulated	2	1.0099	0.3643	downregulated	2	1.16273	0.3126
positive regulation of non-canonical Wnt signaling pathway	GO	2 out of 8	1.92311	upregulated	1	2.22343	0.1082					downregulated	1	0.732131	0.4809																	downregulated	1	0.431814	0.6493
fat cell differentiation	GO	4 out of 8	1.91586	upregulated	5	1.72042	0.179	downregulated	2	0.625455	0.535	downregulated	7	2.69877	0.0673	downregulated	4	2.17376	0.1137	downregulated	6	3.17517	0.0418	downregulated	9	2.89301	0.0554	downregulated	9	2.1406	0.1176	upregulated	6	2.51536	0.0808
U2-type spliceosomal complex	GO	3 out of 8	1.90086	upregulated	2	2.03378	0.1308	upregulated	6	3.96377	0.019	upregulated	2	1.99	0.1367	downregulated	2	0.456419	0.6335	downregulated	2	0.919963	0.3985	downregulated	4	1.24228	0.2887	downregulated	2	1.01526	0.3623	upregulated	7	1.27664	0.279
response to ischemia	GO	3 out of 8	1.87745	downregulated	1	0.471512	0.6241	upregulated	2	5.60177	0.0037	downregulated	1	2.04606	0.1292	downregulated	1	1.4191	0.2419	upregulated	2	2.46969	0.0846	downregulated	2	1.77531	0.1694	downregulated	4	1.52216	0.2182	upregulated	2	0.615435	0.5404
proteasome regulatory particle, base subcomplex	GO	1 out of 8	1.87662					upregulated	1	1.87662	0.1531
regulation of telomerase RNA localization to Cajal body	GO	2 out of 8	1.86694	upregulated	1	0.996307	0.3692																									downregulated	1	0.87063	0.4187
PERK-mediated unfolded protein response	GO	1 out of 8	1.8488					downregulated	1	1.71629	0.1797	upregulated	2	4.11542	0.0163																	upregulated	1	0.550326	0.5768
peroxisomal membrane	GO	2 out of 8	1.82633	upregulated	5	3.83412	0.0216	upregulated	5	4.17302	0.0154	upregulated	6	5.41453	0.0045	downregulated	2	1.44811	0.235	downregulated	2	2.09044	0.1236	upregulated	7	2.76851	0.0628	upregulated	5	2.28797	0.1015	downregulated	4	2.5044	0.0817
positive regulation of cellular protein localization	GO	4 out of 8	1.80437	downregulated	8	0.979261	0.3756	downregulated	6	2.18337	0.1127	downregulated	25	3.30077	0.0369	downregulated	15	3.09195	0.0454	downregulated	17	3.36006	0.0347	downregulated	23	4.28359	0.0138	downregulated	24	1.36302	0.2559	downregulated	19	2.35306	0.0951
regulation of phospholipase C activity	GO	3 out of 8	1.79809	upregulated	2	2.69594	0.0675	upregulated	2	6.26747	0.0019	downregulated	3	2.06016	0.1274	upregulated	1	1.55327	0.2116	upregulated	1	1.97614	0.1386	upregulated	2	1.1003	0.3328	upregulated	4	0.475497	0.6216	upregulated	2	3.10649	0.0448
negative regulation of ERBB signaling pathway	GO	5 out of 8	1.79451	upregulated	1	0.896464	0.408	downregulated	2	3.5672	0.0282	downregulated	3	1.60449	0.201	downregulated	4	2.1209	0.1199	downregulated	2	0.673734	0.5098	downregulated	3	0.853004	0.4261	downregulated	6	3.40536	0.0332	downregulated	5	3.25854	0.0384
MCM complex	GO	1 out of 8	1.75799					upregulated	5	13.1559	1.9e-06	downregulated	2	3.36622	0.0345	downregulated	3	5.77336	0.0031					upregulated	1	0.689153	0.502	upregulated	1	1.56918	0.2082
positive regulation of nuclear-transcribed mRNA catabolic process, deadenylation-dependent decay	GO	4 out of 8	1.75685					upregulated	2	2.0897	0.1237	upregulated	1	1.35306	0.2584	upregulated	1	4.21049	0.0148	upregulated	1	1.82927	0.1605	upregulated	3	2.59954	0.0743	upregulated	3	3.44552	0.0319	downregulated	2	1.97792	0.1384
IRE1-mediated unfolded protein response	GO	3 out of 8	1.74788	upregulated	1	0.976655	0.3766	downregulated	1	0.731349	0.4813	upregulated	4	3.18561	0.0414	downregulated	2	1.47375	0.2291					downregulated	1	0.161091	0.8512	upregulated	2	0.197779	0.8206	upregulated	3	0.172593	0.8415
mitochondrial large ribosomal subunit	GO	3 out of 8	1.73891	upregulated	7	5.87458	0.0028	upregulated	3	1.49855	0.2235	upregulated	3	2.38972	0.0917	upregulated	1	1.26619	0.2819	downregulated	1	0.212689	0.8084	downregulated	7	2.89069	0.0555	downregulated	3	0.317354	0.7281	upregulated	6	1.68182	0.186
positive regulation of macrophage migration	GO	3 out of 8	1.73792					upregulated	1	6.91158	0.001	downregulated	1	2.18321	0.1127	downregulated	2	3.96617	0.0189					downregulated	1	0.525232	0.5914					downregulated	1	0.450493	0.6373
glutathione metabolic process	GO	3 out of 8	1.73478	upregulated	1	0.685731	0.5037	upregulated	1	1.17719	0.3081	upregulated	1	1.80838	0.1639									upregulated	1	0.572452	0.5641	upregulated	1	0.436592	0.6462	upregulated	2	0.927482	0.3955
regulation of extrinsic apoptotic signaling pathway in absence of ligand	GO	3 out of 8	1.72158	upregulated	2	1.38285	0.2509	upregulated	2	4.99041	0.0068	downregulated	3	1.66986	0.1883	downregulated	3	1.33777	0.2624	upregulated	1	1.03733	0.3544	upregulated	2	0.195844	0.8221	upregulated	4	0.488022	0.6138	downregulated	2	0.0771516	0.9257
translation activator activity	GO	3 out of 8	1.70953	upregulated	1	1.03509	0.3552	upregulated	1	1.63549	0.1949	upregulated	1	4.3239	0.0132									upregulated	1	0.690924	0.5011	upregulated	2	2.53468	0.0793	upregulated	2	2.05934	0.1275
bundle of His cell to Purkinje myocyte communication	GO	3 out of 8	1.70829	upregulated	1	2.15716	0.1157					downregulated	1	1.32927	0.2647	downregulated	1	3.00084	0.0497	downregulated	1	1.70675	0.1815	downregulated	1	2.13131	0.1187	downregulated	1	2.17448	0.1137
G-protein coupled purinergic nucleotide receptor signaling pathway	GO	3 out of 8	1.70206	downregulated	1	5.37285	0.0046	upregulated	2	10.5124	2.7e-05	upregulated	1	3.37195	0.0343	downregulated	2	5.59477	0.0037					downregulated	1	0.906403	0.404					upregulated	1	2.12106	0.1199
regulation of viral process	GO	2 out of 8	1.66256	downregulated	6	1.26007	0.2836	upregulated	12	7.21233	0.0007	downregulated	8	0.962356	0.382	downregulated	3	0.554903	0.5741	downregulated	2	0.233938	0.7914	upregulated	13	1.05563	0.348	upregulated	14	0.946768	0.388	upregulated	15	1.00398	0.3664
cytoplasmic sequestering of protein	GO	2 out of 8	1.66138	upregulated	1	1.18161	0.3068	downregulated	1	1.71129	0.1806	upregulated	3	4.06516	0.0172	downregulated	1	1.0561	0.3478					upregulated	1	0.131447	0.8768	upregulated	2	0.68656	0.5033	downregulated	2	1.30255	0.2718
ubiquitin-like protein binding	GO	3 out of 8	1.65566	upregulated	7	1.16412	0.3122	upregulated	5	1.14372	0.3186	upregulated	4	2.75744	0.0635	downregulated	3	0.43197	0.6492	upregulated	2	0.469578	0.6253	upregulated	7	0.864451	0.4213	upregulated	8	0.380859	0.6833	upregulated	9	1.26276	0.2829
proton-exporting ATPase activity	GO	5 out of 8	1.65051	upregulated	1	0.237621	0.7885					upregulated	1	0.613312	0.5416					downregulated	1	0.508791	0.6012	downregulated	2	0.613104	0.5417	upregulated	1	0.43471	0.6475	downregulated	1	0.112397	0.8937
Lys63-specific deubiquitinase activity	GO	4 out of 8	1.64827	upregulated	2	1.65042	0.192	upregulated	1	0.730734	0.4816	upregulated	1	1.47054	0.2298									upregulated	1	0.447115	0.6395	upregulated	2	2.26016	0.1043	downregulated	1	0.503852	0.6042
carbon-carbon lyase activity	GO	3 out of 8	1.64627	downregulated	2	5.39573	0.0045	upregulated	5	4.54442	0.0106	upregulated	6	8.10814	0.0003	upregulated	3	8.03238	0.0003	upregulated	1	3.61242	0.027	upregulated	2	3.24385	0.039	upregulated	2	2.18417	0.1126	upregulated	1	4.60251	0.01
oxidoreductase activity, acting on NAD(P)H, quinone or similar compound as acceptor	GO	5 out of 8	1.63696	upregulated	2	0.592191	0.5531	downregulated	1	1.41001	0.2441	downregulated	3	0.640367	0.5271	downregulated	3	2.9138	0.0543	downregulated	2	0.98058	0.3751	downregulated	5	2.15382	0.116	downregulated	3	0.511166	0.5998	downregulated	2	2.36338	0.0941
regulation of neuron migration	GO	3 out of 8	1.61653	upregulated	3	3.53828	0.0291					downregulated	4	2.75798	0.0634	downregulated	1	0.600528	0.5485	upregulated	1	2.45235	0.0861	upregulated	6	2.63588	0.0717	downregulated	5	3.48156	0.0308	downregulated	7	3.04343	0.0477
tissue remodeling	GO	6 out of 8	1.61648	upregulated	4	3.13071	0.0437	upregulated	3	1.67887	0.1866	downregulated	5	2.62631	0.0723	downregulated	4	2.57181	0.0764	downregulated	1	0.222767	0.8003	downregulated	4	0.441003	0.6434	downregulated	6	0.828426	0.4367	downregulated	2	0.512831	0.5988
regulation of mitotic spindle assembly	GO	3 out of 8	1.61171	upregulated	3	2.18253	0.1128	downregulated	1	1.677	0.1869	downregulated	2	0.968626	0.3796	downregulated	1	0.629671	0.5328	downregulated	1	1.45907	0.2325	downregulated	1	1.14991	0.3167	downregulated	1	1.2454	0.2878
carboxylic acid binding	GO	5 out of 8	1.5978	downregulated	3	4.1344	0.016	upregulated	12	9.2735	9.4e-05	downregulated	11	4.82353	0.008	downregulated	9	4.51587	0.0109	downregulated	5	0.591834	0.5533	downregulated	7	1.63072	0.1958	downregulated	11	1.91251	0.1477	downregulated	10	1.66303	0.1896
regulation of anoikis	GO	4 out of 8	1.58339	upregulated	2	3.19872	0.0408	upregulated	3	5.34922	0.0048	upregulated	2	1.60508	0.2009	downregulated	1	0.406437	0.666	downregulated	1	0.734305	0.4798	upregulated	1	3.24813	0.0388	upregulated	1	3.39388	0.0336	upregulated	1	2.2555	0.1048
maintenance of protein location	GO	5 out of 8	1.54275	upregulated	6	3.61636	0.0269	upregulated	6	5.08485	0.0062	downregulated	11	4.01075	0.0181	downregulated	7	5.66816	0.0035	downregulated	3	0.927557	0.3955	downregulated	5	1.04876	0.3504	downregulated	4	0.54412	0.5804	downregulated	4	0.526211	0.5908
interferon-gamma production	GO	2 out of 8	1.52201					upregulated	1	1.14723	0.3175													downregulated	1	0.374786	0.6874
cellular extravasation	GO	4 out of 8	1.51288					upregulated	1	3.45688	0.0315	downregulated	2	2.386	0.092	downregulated	2	5.16999	0.0057					downregulated	3	1.10369	0.3316	downregulated	3	2.3961	0.0911	downregulated	3	2.11219	0.121
beta-catenin destruction complex disassembly	GO	2 out of 8	1.51185					upregulated	1	3.08654	0.0457	downregulated	2	1.26691	0.2817	downregulated	1	1.02602	0.3584					upregulated	2	1.49914	0.2233	downregulated	2	2.16273	0.115	downregulated	1	0.718247	0.4876
phosphatidylinositol phosphate binding	GO	5 out of 8	1.50362	downregulated	5	3.14284	0.0432	upregulated	1	1.76591	0.171	downregulated	14	5.67899	0.0034	downregulated	10	6.85971	0.001	downregulated	9	3.87998	0.0207	downregulated	15	2.47002	0.0846	downregulated	16	4.97394	0.0069	downregulated	15	4.09532	0.0167
ATP synthesis coupled proton transport	GO	2 out of 8	1.4886																					downregulated	1	0.778483	0.4591	downregulated	1	0.710112	0.4916
phosphatidylinositol-4,5-bisphosphate phosphatase activity	GO	3 out of 8	1.47462	upregulated	3	3.38613	0.0338	downregulated	1	1.51458	0.2199	downregulated	1	1.96285	0.1405	downregulated	1	1.21701	0.2961	downregulated	1	1.91494	0.1474	downregulated	1	2.01184	0.1337					upregulated	2	1.14385	0.3186
response to steroid hormone	GO	3 out of 8	1.47187	downregulated	11	3.46124	0.0314	upregulated	9	4.06177	0.0172	upregulated	12	2.84808	0.058	upregulated	6	5.15848	0.0058	upregulated	5	0.689569	0.5018	upregulated	17	2.37679	0.0928	upregulated	24	1.12411	0.3249	upregulated	18	2.94475	0.0526
regulation of ruffle assembly	GO	4 out of 8	1.47098	downregulated	1	1.42172	0.2413	upregulated	2	7.05354	0.0009	downregulated	4	2.49868	0.0822	downregulated	3	3.8146	0.022	upregulated	1	2.20994	0.1097	downregulated	3	1.61169	0.1996	downregulated	3	1.04844	0.3505	downregulated	3	1.70224	0.1823
positive regulation of transcription from RNA polymerase II promoter in response to endoplasmic reticulum stress	GO	2 out of 8	1.46543					upregulated	1	1.88837	0.1513	upregulated	1	2.83852	0.0585	downregulated	1	1.2375	0.2901									upregulated	2	1.5056	0.2219	upregulated	1	0.518367	0.5955
extracellular negative regulation of signal transduction	GO	4 out of 8	1.45157	downregulated	2	2.64439	0.071					upregulated	1	1.65899	0.1903					downregulated	1	0.930499	0.3944	downregulated	3	1.09381	0.3349	downregulated	2	0.565924	0.5678	upregulated	1	0.153249	0.8579
regulation of autophagosome assembly	GO	5 out of 8	1.44839	upregulated	3	3.21536	0.0401	upregulated	3	3.07498	0.0462	downregulated	3	2.45923	0.0855	downregulated	4	4.614	0.0099	downregulated	2	1.4471	0.2353	downregulated	3	1.40421	0.2456	upregulated	4	1.64217	0.1936	downregulated	2	1.02214	0.3598
cell separation after cytokinesis	GO	2 out of 8	1.43613	upregulated	1	1.35935	0.2568	upregulated	1	1.07076	0.3427									downregulated	1	1.64626	0.1928	downregulated	1	1.3271	0.2652	upregulated	1	1.53723	0.215
mitochondrial tRNA processing	GO	2 out of 8	1.41827					upregulated	1	1.94202	0.1434					downregulated	1	1.31589	0.2682					downregulated	1	0.792144	0.4529
fucosylation	GO	3 out of 8	1.40793													downregulated	1	1.95673	0.1413	downregulated	1	2.01124	0.1338	downregulated	1	0.922956	0.3973					downregulated	1	0.430471	0.6502
regulation of postsynaptic membrane organization	GO	3 out of 8	1.40144					upregulated	2	3.98015	0.0187					upregulated	1	2.78381	0.0618	upregulated	1	1.38098	0.2513	downregulated	1	0.544914	0.5799	downregulated	1	1.08187	0.339	upregulated	2	1.62817	0.1963
natural killer cell mediated cytotoxicity	GO	3 out of 8	1.39973	downregulated	1	1.52317	0.218	upregulated	1	0.748639	0.473	upregulated	1	0.727874	0.4829	upregulated	1	2.61757	0.073					upregulated	1	0.0967874	0.9077	upregulated	2	0.858182	0.4239	upregulated	1	0.216223	0.8056
tethering complex	GO	4 out of 8	1.37096	upregulated	3	1.37028	0.254	downregulated	2	3.38401	0.0339	downregulated	4	1.01213	0.3634	upregulated	2	1.90853	0.1483	downregulated	4	2.64796	0.0708	downregulated	9	4.92659	0.0073	upregulated	8	2.31098	0.0992	upregulated	6	2.77529	0.0623
G-protein alpha-subunit binding	GO	3 out of 8	1.35767	upregulated	1	3.69012	0.025	upregulated	1	1.11421	0.3282	downregulated	2	6.30469	0.0018	downregulated	1	4.19601	0.0151	downregulated	1	1.16488	0.312	downregulated	2	1.0747	0.3414	upregulated	1	1.57826	0.2063	downregulated	1	0.696355	0.4984
regulation of cytokine production involved in inflammatory response	GO	3 out of 8	1.34766	downregulated	3	4.01114	0.0181	upregulated	2	3.15378	0.0427									downregulated	1	1.15395	0.3154	upregulated	2	0.920235	0.3984					downregulated	1	1.05108	0.3496
regulation of cellular protein localization	GO	5 out of 8	1.34474	upregulated	23	0.949873	0.3868	downregulated	11	3.51863	0.0296	upregulated	14	1.95829	0.1411	downregulated	21	2.26277	0.1041	downregulated	25	2.91028	0.0545	downregulated	38	4.44457	0.0117	upregulated	46	4.50407	0.0111	downregulated	37	1.36719	0.2548
mitochondrial ribosome	GO	3 out of 8	1.34368	upregulated	9	5.63471	0.0036	upregulated	4	1.41803	0.2422	upregulated	3	1.48887	0.2256	upregulated	1	0.918966	0.3989	downregulated	1	0.0825571	0.9208	downregulated	9	2.5171	0.0807	downregulated	4	0.186151	0.8301	upregulated	9	1.44213	0.2364
RNA polymerase III regulatory region DNA binding	GO	1 out of 8	1.32376																													downregulated	1	1.32376	0.2661
aminoacyl-tRNA metabolism involved in translational fidelity	GO	3 out of 8	1.32153					downregulated	1	2.28286	0.102													downregulated	1	0.887074	0.4119	downregulated	1	1.13377	0.3218	downregulated	1	1.58354	0.2052
metallopeptidase activity	GO	3 out of 8	1.3206	upregulated	6	0.721221	0.4862	downregulated	3	0.729429	0.4822	upregulated	7	4.3525	0.0129	downregulated	9	2.99473	0.05	upregulated	3	0.72325	0.4852	upregulated	12	1.42449	0.2406	upregulated	11	0.75422	0.4704	downregulated	9	2.87301	0.0565
meiotic cell cycle	GO	5 out of 8	1.31292	upregulated	8	0.763196	0.4662	upregulated	11	3.30276	0.0368	downregulated	13	1.71834	0.1794	downregulated	8	1.34151	0.2615	downregulated	4	0.188317	0.8284	downregulated	6	0.0458863	0.9552	upregulated	8	0.194846	0.823	downregulated	11	0.267451	0.7653
positive regulation of cell size	GO	3 out of 8	1.29886					upregulated	1	1.40701	0.2449	upregulated	1	1.35327	0.2584					downregulated	1	1.36486	0.2554	upregulated	1	0.765406	0.4651	upregulated	1	1.00033	0.3678	upregulated	1	1.06055	0.3463
ovulation	GO	1 out of 8	1.29792									upregulated	1	2.71818	0.066													upregulated	2	0.678668	0.5073	upregulated	1	0.741588	0.4764
TBP-class protein binding	GO	2 out of 8	1.29738	upregulated	3	2.07199	0.1259	upregulated	1	1.33686	0.2627					downregulated	2	1.43169	0.2389					upregulated	1	0.243951	0.7835	upregulated	2	0.313473	0.7309	upregulated	1	0.12236	0.8848
thyroid hormone receptor binding	GO	2 out of 8	1.28977					upregulated	1	0.704884	0.4942	downregulated	3	0.716968	0.4882	upregulated	2	4.32163	0.0133					upregulated	2	0.127211	0.8805	upregulated	5	1.51785	0.2192	upregulated	5	1.3747	0.2529
regulation of microtubule motor activity	GO	4 out of 8	1.2857	upregulated	1	2.04237	0.1297					downregulated	1	3.11745	0.0443	downregulated	1	3.0683	0.0465					downregulated	1	1.69299	0.184	downregulated	2	1.66235	0.1897	downregulated	1	2.07373	0.1257
establishment of skin barrier	GO	1 out of 8	1.26943	upregulated	1	1.65796	0.1905					downregulated	1	0.388522	0.6781
estrous cycle	GO	3 out of 8	1.2655	upregulated	1	1.28865	0.2756	upregulated	2	4.79189	0.0083	downregulated	1	3.05205	0.0473					upregulated	1	1.46865	0.2302	downregulated	1	2.81397	0.06	upregulated	3	2.14012	0.1176	upregulated	2	0.968191	0.3798
mitochondrial outer membrane permeabilization involved in programmed cell death	GO	2 out of 8	1.2618	downregulated	1	1.30306	0.2717									upregulated	1	2.92543	0.0536					upregulated	1	0.507648	0.6019	upregulated	1	1.08207	0.3389	downregulated	1	1.22916	0.2925
class I DNA-(apurinic or apyrimidinic site) endonuclease activity	GO	1 out of 8	1.23163	upregulated	1	1.23163	0.2918
regulation of organelle assembly	GO	3 out of 8	1.21923	upregulated	17	6.22672	0.002	upregulated	10	2.36056	0.0944	downregulated	18	1.59013	0.2039	downregulated	11	2.20881	0.1098	upregulated	4	0.622142	0.5368	upregulated	22	1.7913	0.1667	upregulated	28	2.70387	0.0669	downregulated	14	1.5482	0.2126
canonical glycolysis	GO	3 out of 8	1.21244					downregulated	1	2.13072	0.1188					downregulated	1	0.965889	0.3806					downregulated	3	1.97923	0.1382	downregulated	1	0.426241	0.653	downregulated	2	1.90358	0.149
G-protein coupled peptide receptor activity	GO	3 out of 8	1.18563	upregulated	3	5.27374	0.0051	upregulated	4	6.18352	0.0021	downregulated	6	4.43962	0.0118	downregulated	3	3.64096	0.0262	upregulated	2	1.40541	0.2453	upregulated	3	0.657803	0.518	downregulated	3	1.08739	0.3371	upregulated	3	1.21524	0.2966
positive regulation of telomerase RNA localization to Cajal body	GO	1 out of 8	1.18271	upregulated	1	1.18271	0.3064
positive regulation of fertilization	GO	1 out of 8	1.17759									downregulated	1	1.42455	0.2406	upregulated	1	2.60213	0.0741
lactation	GO	5 out of 8	1.16503	downregulated	1	2.99215	0.0502	upregulated	1	2.28547	0.1017	downregulated	3	0.510159	0.6004					downregulated	1	0.185007	0.8311	downregulated	3	0.460562	0.6309	downregulated	4	1.14902	0.3169	downregulated	3	0.587276	0.5558
vacuolar proton-transporting V-type ATPase complex	GO	2 out of 8	1.16291													downregulated	1	0.980334	0.3752	downregulated	1	1.21954	0.2954	downregulated	1	0.923701	0.397
glycolytic process through glucose-6-phosphate	GO	3 out of 8	1.16263					downregulated	1	2.10047	0.1224					downregulated	1	0.940833	0.3903					downregulated	3	1.89295	0.1506	downregulated	2	0.438099	0.6453	downregulated	2	1.87288	0.1537
glycolytic process through fructose-6-phosphate	GO	3 out of 8	1.16263					downregulated	1	2.10047	0.1224					downregulated	1	0.940833	0.3903					downregulated	3	1.89295	0.1506	downregulated	2	0.438099	0.6453	downregulated	2	1.87288	0.1537
female gamete generation	GO	2 out of 8	1.14863	downregulated	3	0.805043	0.4471	downregulated	1	0.188159	0.8285	upregulated	2	4.70372	0.0091	upregulated	1	3.46225	0.0314	upregulated	2	1.22535	0.2937	upregulated	6	1.3721	0.2536	upregulated	10	1.61264	0.1994	upregulated	7	1.81404	0.163
extracellular matrix structural constituent	GO	3 out of 8	1.12535	upregulated	5	2.41987	0.0889	upregulated	2	0.485971	0.6151	downregulated	9	0.761768	0.4668	downregulated	4	0.414534	0.6606	downregulated	1	0.180232	0.8351	upregulated	5	0.909408	0.4028	downregulated	6	0.977893	0.3761	downregulated	7	0.876632	0.4162
cadherin binding involved in cell-cell adhesion	GO	4 out of 8	1.12142	downregulated	1	1.71588	0.1798	upregulated	1	1.30719	0.2706	upregulated	2	3.00014	0.0498	upregulated	1	3.09115	0.0454	downregulated	1	1.46064	0.2321	upregulated	2	0.821285	0.4399	upregulated	3	2.65701	0.0702	upregulated	3	2.54353	0.0786
endoplasmic reticulum tubular network	GO	2 out of 8	1.11285	upregulated	5	6.34038	0.0018					downregulated	1	0.336778	0.7141	downregulated	2	1.35366	0.2583					downregulated	3	2.13928	0.1177	upregulated	5	4.08132	0.0169	upregulated	4	1.59505	0.2029
ceramide binding	GO	4 out of 8	1.08893	upregulated	1	0.843731	0.4301					downregulated	2	3.77473	0.0229	downregulated	1	1.72166	0.1788	upregulated	1	1.64997	0.1921	downregulated	2	2.41128	0.0897	downregulated	2	1.54082	0.2142	downregulated	2	3.43948	0.0321
regulation of smooth muscle cell proliferation	GO	4 out of 8	1.07793	upregulated	5	4.12165	0.0162	upregulated	3	0.606154	0.5454	upregulated	7	3.96553	0.019	downregulated	9	5.7469	0.0032	downregulated	1	0.495884	0.609	upregulated	10	0.778942	0.4589	upregulated	12	2.36439	0.094	downregulated	4	0.992829	0.3705
mesodermal cell fate commitment	GO	1 out of 8	1.07504									downregulated	1	5.15802	0.0058	downregulated	1	4.60998	0.01													downregulated	1	1.07504	0.3413
regulation of ceramide biosynthetic process	GO	3 out of 8	1.07323					upregulated	1	0.952224	0.3859	upregulated	1	2.11476	0.1207	downregulated	1	1.24194	0.2888									downregulated	1	0.663594	0.515	upregulated	2	1.41541	0.2428
negative regulation of viral-induced cytoplasmic pattern recognition receptor signaling pathway	GO	2 out of 8	1.01191					upregulated	2	3.2808	0.0376	downregulated	1	2.86575	0.0569													downregulated	1	0.596866	0.5505
positive regulation of extrinsic apoptotic signaling pathway in absence of ligand	GO	2 out of 8	1.01093	upregulated	1	0.729254	0.4823	upregulated	1	3.18324	0.0415	downregulated	1	1.27562	0.2793	downregulated	1	1.62593	0.1967
cellular glucuronidation	GO	1 out of 8	1.00887																					downregulated	1	1.00887	0.3646
phosphatidylethanolamine acyl-chain remodeling	GO	3 out of 8	0.960117					downregulated	1	1.13743	0.3206	downregulated	1	1.21764	0.2959					downregulated	1	0.825103	0.4382	downregulated	1	0.661231	0.5162	downregulated	1	1.03495	0.3552	downregulated	1	1.82885	0.1606
lipid droplet	GO	3 out of 8	0.947246	downregulated	1	1.57771	0.2064	upregulated	5	5.14938	0.0058	downregulated	4	4.44614	0.0117	downregulated	5	2.88478	0.0559	downregulated	1	0.207787	0.8124	upregulated	4	0.414824	0.6605	downregulated	3	0.369991	0.6907	downregulated	5	0.784292	0.4564
response to immobilization stress	GO	2 out of 8	0.936609																	downregulated	1	0.496193	0.6088	downregulated	2	2.01495	0.1333	downregulated	1	0.51246	0.599	upregulated	2	1.57454	0.2071
blood coagulation, fibrin clot formation	GO	1 out of 8	0.899011					downregulated	1	1.57263	0.2075	upregulated	1	2.54621	0.0784													upregulated	1	0.0745641	0.9281
oxygen carrier activity	GO	1 out of 8	0.887074	downregulated	1	1.98133	0.1379					downregulated	1	5.66955	0.0034									downregulated	1	0.887074	0.4119
positive regulation of exosomal secretion	GO	3 out of 8	0.832288					upregulated	1	1.09176	0.3356					downregulated	1	1.59724	0.2025					upregulated	1	0.3931	0.675	downregulated	1	0.767705	0.4641	downregulated	1	0.96316	0.3817
intermediate filament	GO	2 out of 8	0.814133	downregulated	2	0.938055	0.3914	downregulated	1	1.02395	0.3592	upregulated	2	1.64129	0.1937	upregulated	3	2.50164	0.082	downregulated	3	1.45184	0.2341	upregulated	5	2.32242	0.098	upregulated	5	1.63742	0.1945	downregulated	9	0.999712	0.368
developmental maturation	GO	5 out of 8	0.806889	downregulated	4	2.871	0.0566	upregulated	1	3.33756	0.0355	downregulated	21	5.38866	0.0046	downregulated	10	4.36686	0.0127	downregulated	6	1.80685	0.1642	downregulated	11	2.95828	0.0519	downregulated	13	2.52906	0.0797	downregulated	17	2.80166	0.0607
sister chromatid segregation	GO	3 out of 8	0.806276	upregulated	10	2.94548	0.0526	upregulated	12	8.02253	0.0003	downregulated	11	1.2396	0.2895	downregulated	4	0.442621	0.6424	downregulated	3	0.396496	0.6727	downregulated	6	0.406638	0.6659	upregulated	9	0.202872	0.8164	downregulated	4	0.206015	0.8138
carbohydrate transmembrane transporter activity	GO	5 out of 8	0.798257	upregulated	2	2.24609	0.1058					downregulated	2	3.678	0.0253	downregulated	3	6.4566	0.0016	downregulated	1	1.08797	0.3369	downregulated	2	2.01767	0.133	downregulated	2	1.89879	0.1497	downregulated	5	3.68233	0.0252
RNA stem-loop binding	GO	4 out of 8	0.785738					upregulated	1	0.591508	0.5535	downregulated	2	1.60889	0.2001	upregulated	1	4.09359	0.0167	downregulated	1	0.607886	0.5445	upregulated	4	2.69267	0.0677	upregulated	3	1.97845	0.1383	downregulated	2	1.77277	0.1699
outer dynein arm assembly	GO	3 out of 8	0.780819					upregulated	1	1.69763	0.1831	upregulated	1	2.44748	0.0865	upregulated	1	3.64268	0.0262					upregulated	3	2.31132	0.0991	upregulated	4	3.26461	0.0382	upregulated	2	1.43105	0.2391
signal transduction involved in G2 DNA damage checkpoint	GO	4 out of 8	0.772899	upregulated	1	0.532666	0.587	upregulated	2	2.0932	0.1233	upregulated	1	2.207	0.11	downregulated	2	3.47854	0.0309					upregulated	1	0.90542	0.4044					downregulated	1	0.324002	0.7232
chloride ion binding	GO	4 out of 8	0.760301									upregulated	1	1.75797	0.1724	downregulated	2	2.80038	0.0608					downregulated	1	0.534492	0.586	downregulated	1	0.783163	0.457	downregulated	1	0.485052	0.6157
pre-mRNA cleavage required for polyadenylation	GO	2 out of 8	0.757377					upregulated	1	1.36341	0.2558	upregulated	1	1.75397	0.1731	downregulated	1	1.89085	0.1509									upregulated	1	0.469152	0.6255
sperm midpiece	GO	3 out of 8	0.744635	upregulated	1	2.496	0.0824	upregulated	1	1.2697	0.2809	upregulated	1	1.37649	0.2525					upregulated	1	1.81491	0.1629	upregulated	1	1.08906	0.3365	upregulated	1	1.49358	0.2246
vitamin transmembrane transporter activity	GO	2 out of 8	0.738498	upregulated	1	1.77468	0.1695	downregulated	1	1.06991	0.343	downregulated	1	0.259254	0.7716													downregulated	1	0.292981	0.746
negative regulation of cellular protein localization	GO	4 out of 8	0.732355	upregulated	7	2.1211	0.1199	downregulated	3	3.53273	0.0292	upregulated	3	3.35335	0.035	downregulated	4	1.38386	0.2506	downregulated	8	4.77942	0.0084	downregulated	12	5.04773	0.0064	upregulated	16	7.34726	0.0006	upregulated	14	2.3054	0.0997
Golgi stack	GO	1 out of 8	0.730949	upregulated	5	1.93358	0.1446	upregulated	4	1.07241	0.3422	upregulated	5	2.83178	0.0589	downregulated	5	1.13697	0.3208	upregulated	4	4.0547	0.0173	upregulated	12	2.82672	0.0592	downregulated	13	3.05336	0.0472	downregulated	16	4.78565	0.0083
deaminase activity	GO	2 out of 8	0.713572	downregulated	1	1.40256	0.246	upregulated	3	3.83974	0.0215	downregulated	2	5.122	0.006	downregulated	1	1.07745	0.3405									upregulated	1	0.103886	0.9013	downregulated	2	4.57972	0.0103
protein tyrosine kinase binding	GO	5 out of 8	0.705617	upregulated	1	0.42591	0.6532	upregulated	3	1.118	0.3269	downregulated	6	2.53993	0.0789	upregulated	1	1.91955	0.1467	upregulated	5	3.44273	0.032	downregulated	6	2.31187	0.0991	downregulated	5	2.13345	0.1184	upregulated	6	1.22051	0.2951
retinoid binding	GO	1 out of 8	0.677821	upregulated	1	1.5507	0.2121					upregulated	2	2.44954	0.0863	upregulated	1	1.53689	0.215					upregulated	1	0.0868563	0.9168					downregulated	2	0.764677	0.4655
bone trabecula morphogenesis	GO	4 out of 8	0.675014	downregulated	1	1.69729	0.1832					downregulated	2	3.05356	0.0472					downregulated	1	1.32676	0.2653	downregulated	1	1.22445	0.2939	downregulated	1	1.38222	0.251	downregulated	1	1.49243	0.2248
chylomicron	GO	1 out of 8	0.670288					upregulated	1	1.30968	0.2699	downregulated	1	0.639388	0.5276
nuclear import signal receptor activity	GO	2 out of 8	0.664337	upregulated	1	0.935715	0.3923									upregulated	1	2.55092	0.078					upregulated	1	0.391367	0.6761	upregulated	1	1.20495	0.2997	upregulated	1	1.22598	0.2935
angiotensin-activated signaling pathway	GO	1 out of 8	0.645294					upregulated	1	3.64125	0.0262													upregulated	1	1.03857	0.354	upregulated	1	1.28057	0.2779	upregulated	1	0.676808	0.5082
extracellular matrix structural constituent conferring compression resistance	GO	2 out of 8	0.61286	upregulated	1	1.11421	0.3282					downregulated	1	0.484572	0.616									upregulated	1	0.309765	0.7336	downregulated	1	0.292981	0.746
proteasome regulatory particle	GO	1 out of 8	0.586631	upregulated	1	0.930435	0.3944	upregulated	1	1.37682	0.2524	upregulated	1	1.2396	0.2895																	downregulated	1	0.586631	0.5562
TRAPP complex	GO	3 out of 8	0.574171					downregulated	1	1.68089	0.1862	downregulated	1	1.68173	0.1861	downregulated	1	1.99121	0.1365	downregulated	1	1.69032	0.1845	downregulated	2	2.33409	0.0969					downregulated	2	1.9036	0.149
profilin binding	GO	1 out of 8	0.553952									downregulated	1	0.752277	0.4713																	downregulated	1	0.553952	0.5747
mitochondrial small ribosomal subunit	GO	1 out of 8	0.548685	upregulated	2	1.17779	0.308	downregulated	1	1.40404	0.2456	upregulated	1	0.880227	0.4147									downregulated	3	1.43599	0.2379					upregulated	3	0.887301	0.4118
inhibition of cysteine-type endopeptidase activity	GO	2 out of 8	0.515753	upregulated	1	0.801191	0.4488									downregulated	1	1.26608	0.2819									downregulated	1	0.980643	0.3751
bone resorption	GO	4 out of 8	0.508797	downregulated	1	1.01683	0.3617	upregulated	1	1.2236	0.2942	downregulated	1	1.16989	0.3104	downregulated	1	1.29699	0.2734					downregulated	1	0.57561	0.5624	downregulated	2	1.00055	0.3677	downregulated	1	1.19275	0.3034
negative regulation of peptidyl-lysine acetylation	GO	4 out of 8	0.483398	downregulated	1	3.38957	0.0337					upregulated	1	2.0275	0.1317	downregulated	1	0.586765	0.5561	downregulated	1	1.15413	0.3153	downregulated	1	1.06013	0.3464	upregulated	2	0.392991	0.675	downregulated	2	0.610962	0.5428
protein-containing complex disassembly	GO	3 out of 8	0.462603	upregulated	16	2.91628	0.0541	upregulated	13	2.74036	0.0645	downregulated	11	1.28596	0.2764	downregulated	8	1.26364	0.2826	upregulated	1	2.17547	0.1136	downregulated	20	2.55448	0.0777	upregulated	14	0.847984	0.4283	upregulated	19	2.17547	0.1136
generation of precursor metabolites and energy	GO	3 out of 8	0.459758	upregulated	11	1.24741	0.2872	upregulated	15	3.42172	0.0327	upregulated	11	4.0725	0.017	downregulated	12	1.71244	0.1804	downregulated	9	0.437779	0.6455	downregulated	26	2.01926	0.1328	downregulated	20	0.154412	0.8569	upregulated	20	2.1517	0.1163
response to unfolded protein	GO	6 out of 8	0.457847	downregulated	3	4.10234	0.0165	upregulated	8	1.55515	0.2112	upregulated	6	1.68415	0.1856	downregulated	4	0.315496	0.7294	downregulated	3	0.261254	0.7701	downregulated	6	0.507546	0.602	downregulated	7	0.433234	0.6484	downregulated	4	0.434344	0.6477
anterior/posterior axis specification	GO	2 out of 8	0.454522	upregulated	2	1.091	0.3359					downregulated	3	1.92614	0.1457	downregulated	1	0.506411	0.6027					upregulated	4	1.70919	0.181	upregulated	3	0.204269	0.8152	downregulated	7	3.70954	0.0245
divalent inorganic cation transmembrane transporter activity	GO	3 out of 8	0.446471	upregulated	2	2.71531	0.0662	upregulated	1	3.96607	0.0189	downregulated	1	0.237517	0.7886					downregulated	1	1.72256	0.1786	upregulated	3	2.94358	0.0527	upregulated	3	2.93417	0.0532	upregulated	3	1.84221	0.1585
histone H3-K9 modification	GO	3 out of 8	0.430139	upregulated	2	2.34066	0.0963	upregulated	1	1.20028	0.3011					downregulated	1	1.14121	0.3194					upregulated	1	1.53725	0.215	upregulated	2	0.824655	0.4384	downregulated	1	0.392321	0.6755
small ribosomal subunit	GO	5 out of 8	0.422498	upregulated	3	0.483162	0.6168	downregulated	1	0.596508	0.5507	upregulated	3	2.63538	0.0717	upregulated	1	1.63212	0.1955	downregulated	1	0.346848	0.7069	downregulated	4	0.374428	0.6877	upregulated	9	0.974255	0.3775	upregulated	11	3.47868	0.0308
negative regulation of extrinsic apoptotic signaling pathway in absence of ligand	GO	3 out of 8	0.408374	upregulated	1	1.76889	0.1705	upregulated	2	5.83642	0.0029	downregulated	3	2.61815	0.0729	downregulated	3	2.22184	0.1084	upregulated	1	1.43361	0.2384	upregulated	2	0.417527	0.6587	upregulated	3	0.805298	0.447	downregulated	2	0.29949	0.7412
macromolecule depalmitoylation	GO	5 out of 8	0.404361	upregulated	2	3.1494	0.0429	upregulated	1	1.94202	0.1434	downregulated	2	3.7076	0.0245					downregulated	1	1.37429	0.253	downregulated	1	1.11221	0.3288	downregulated	1	1.59489	0.2029	upregulated	3	5.06085	0.0063
palmitoyl hydrolase activity	GO	5 out of 8	0.404361	upregulated	2	3.1494	0.0429	upregulated	1	1.94202	0.1434	downregulated	2	3.7076	0.0245					downregulated	1	1.37429	0.253	downregulated	1	1.11221	0.3288	downregulated	1	1.59489	0.2029	upregulated	3	5.06085	0.0063
cellular response to angiotensin	GO	2 out of 8	0.348793					upregulated	2	3.01281	0.0492	downregulated	2	0.802567	0.4482	downregulated	1	0.937453	0.3916					upregulated	2	0.595679	0.5512	downregulated	2	0.823531	0.4389	upregulated	2	1.15185	0.3161
cellular response to topologically incorrect protein	GO	5 out of 8	0.344592	downregulated	3	2.60425	0.074	upregulated	6	0.832202	0.4351	upregulated	6	1.88486	0.1519	downregulated	3	0.367132	0.6927	downregulated	3	0.233319	0.7919	downregulated	6	0.336661	0.7142	upregulated	8	0.45167	0.6366	downregulated	3	0.480599	0.6184
guanyl-nucleotide exchange factor activity	GO	2 out of 8	0.343943	downregulated	11	5.93737	0.0026	upregulated	11	3.84403	0.0214	downregulated	35	14.2692	6.4e-07	downregulated	23	6.60396	0.0014	upregulated	11	4.60863	0.01	downregulated	25	2.56585	0.0769	upregulated	36	2.84367	0.0582	downregulated	33	5.2304	0.0054
negative regulation of autophagosome assembly	GO	4 out of 8	0.327026					upregulated	1	0.977783	0.3761	downregulated	1	0.767381	0.4642	downregulated	2	2.58897	0.0751	downregulated	1	1.30228	0.2719	downregulated	1	0.951328	0.3862	downregulated	1	0.451983	0.6364
photoreceptor cell outer segment organization	GO	2 out of 8	0.316365	upregulated	1	1.64442	0.1931	downregulated	1	2.97417	0.0511	upregulated	1	1.64612	0.1928
cyclin-dependent protein serine/threonine kinase regulator activity	GO	2 out of 8	0.310504	downregulated	1	0.748042	0.4733	upregulated	3	4.92517	0.0073	upregulated	3	2.72832	0.0653	downregulated	1	1.62845	0.1962	downregulated	1	1.27574	0.2792	upregulated	3	1.41386	0.2432	upregulated	4	1.17652	0.3084	upregulated	2	0.923549	0.3971
semaphorin-plexin signaling pathway involved in axon guidance	GO	3 out of 8	0.309533	downregulated	1	2.72177	0.0658					downregulated	3	2.81046	0.0602									downregulated	2	1.97619	0.1386	downregulated	2	1.83559	0.1595	downregulated	2	2.02999	0.1313
cullin family protein binding	GO	2 out of 8	0.273882	upregulated	2	1.35756	0.2573					upregulated	2	2.4694	0.0846									downregulated	1	0.847483	0.4285	upregulated	2	1.89061	0.151	upregulated	3	1.66247	0.1897
aging	GO	4 out of 8	0.272039	downregulated	5	3.74693	0.0236	upregulated	15	7.26999	0.0007	downregulated	22	6.65235	0.0013	downregulated	14	5.73301	0.0032	upregulated	2	0.59505	0.5515	downregulated	13	0.511996	0.5993	downregulated	9	0.478027	0.62	downregulated	5	2.08702	0.1241
regulation of cellular response to hypoxia	GO	1 out of 8	0.253885					downregulated	1	2.01267	0.1336	upregulated	1	2.26655	0.1037
carbohydrate biosynthetic process	GO	5 out of 8	0.23589	downregulated	1	4.63381	0.0097	downregulated	3	1.23546	0.2907	upregulated	6	3.84356	0.0214	downregulated	7	3.57714	0.028	downregulated	2	1.01695	0.3617	downregulated	12	2.78525	0.0617	downregulated	8	1.30084	0.2723	downregulated	5	0.73572	0.4792
neurotransmitter transporter activity	GO	1 out of 8	0.214086	upregulated	2	4.2684	0.014	upregulated	1	1.97071	0.1394	upregulated	1	6.42073	0.0016	downregulated	1	1.74976	0.1738	upregulated	3	5.69815	0.0034	downregulated	5	4.53279	0.0108	downregulated	7	4.42512	0.012	downregulated	3	5.91224	0.0027
cellular response to platelet-derived growth factor stimulus	GO	2 out of 8	0.206964					upregulated	1	1.68599	0.1853	upregulated	1	2.98312	0.0506	downregulated	2	1.96977	0.1395					upregulated	1	0.520583	0.5942	upregulated	3	1.32122	0.2668	upregulated	2	0.650569	0.5217
response to topologically incorrect protein	GO	6 out of 8	0.201488	downregulated	4	3.66935	0.0255	upregulated	8	1.02894	0.3574	upregulated	7	1.90601	0.1487	downregulated	4	0.212141	0.8089	downregulated	4	0.249416	0.7793	downregulated	7	0.308452	0.7346	downregulated	8	0.240888	0.7859	downregulated	5	0.349263	0.7052
cellular response to nerve growth factor stimulus	GO	4 out of 8	0.20145	upregulated	1	0.243817	0.7836	upregulated	3	2.38055	0.0925	upregulated	3	2.8946	0.0553	upregulated	2	3.3659	0.0345	upregulated	1	0.537301	0.5843	upregulated	7	2.51607	0.0808	upregulated	8	2.65351	0.0704	upregulated	8	2.97653	0.051
eosinophil migration	GO	1 out of 8	0.198351	downregulated	1	2.49718	0.0823					upregulated	1	2.69553	0.0675
positive regulation of DNA biosynthetic process	GO	5 out of 8	0.194199	upregulated	5	3.7321	0.0239	upregulated	4	3.25197	0.0387	downregulated	7	7.09925	0.0008	downregulated	5	5.32335	0.0049	downregulated	4	1.80236	0.1649	downregulated	4	2.18206	0.1128	downregulated	5	2.84685	0.058	downregulated	2	2.05342	0.1283
activation of innate immune response	GO	3 out of 8	0.192272	downregulated	8	4.01702	0.018	upregulated	7	6.2057	0.002	downregulated	29	18.9877	5.7e-09	downregulated	23	23.3556	7.2e-11	downregulated	5	0.293936	0.7453	downregulated	8	1.36231	0.2561	upregulated	10	2.97894	0.0508	downregulated	14	1.51497	0.2198
lipid transporter activity	GO	2 out of 8	0.185344	downregulated	4	1.20146	0.3008	upregulated	4	0.9702	0.379	downregulated	10	5.06257	0.0063	downregulated	8	7.31667	0.0007	downregulated	5	2.75058	0.0639	upregulated	8	1.22512	0.2937	downregulated	9	1.04192	0.3528	upregulated	2	2.38204	0.0924
nuclear pore	GO	2 out of 8	0.184703	upregulated	5	1.96293	0.1404	downregulated	2	1.88247	0.1522	upregulated	2	0.386137	0.6797	downregulated	5	1.46038	0.2321	downregulated	2	0.170857	0.8429	downregulated	4	0.223867	0.7994	upregulated	4	0.0411541	0.9597	upregulated	6	0.168868	0.8446
seminiferous tubule development	GO	3 out of 8	0.142275	upregulated	1	0.929689	0.3947	upregulated	1	1.01889	0.361	upregulated	1	1.46894	0.2302	downregulated	1	1.16891	0.3107					upregulated	1	0.536849	0.5846	upregulated	2	0.833882	0.4344	upregulated	1	0.735608	0.4792
positive regulation of podosome assembly	GO	2 out of 8	0.140854					upregulated	1	2.83339	0.0588													downregulated	1	1.49169	0.225	upregulated	2	2.03585	0.1306	upregulated	2	2.14837	0.1167
translation	GO	3 out of 8	0.113293	upregulated	15	0.251288	0.7778	upregulated	16	3.78873	0.0226	upregulated	13	1.37089	0.2539	upregulated	5	1.41957	0.2418	downregulated	9	0.316791	0.7285	downregulated	27	0.922701	0.3974	downregulated	17	0.0576494	0.944	upregulated	39	1.18385	0.3061
positive regulation of cold-induced thermogenesis	GO	4 out of 8	0.111903	downregulated	1	2.28362	0.1019	upregulated	5	3.32606	0.0359	upregulated	5	3.22706	0.0397	downregulated	2	1.68723	0.185	upregulated	1	1.58142	0.2057	downregulated	5	1.20515	0.2996	upregulated	7	3.49914	0.0302	downregulated	3	1.40504	0.2454
pteridine-containing compound metabolic process	GO	2 out of 8	0.109047	downregulated	2	1.87255	0.1537	upregulated	3	5.17894	0.0056	downregulated	6	2.72442	0.0656	downregulated	2	1.20841	0.2987					upregulated	1	0.0510365	0.9502	downregulated	2	0.786523	0.4554	upregulated	3	1.55137	0.212
transferase activity, transferring pentosyl groups	GO	4 out of 8	0.0910392	upregulated	3	1.05615	0.3478	upregulated	2	0.946241	0.3882	upregulated	1	2.92772	0.0535	upregulated	1	1.82344	0.1615					upregulated	6	1.54447	0.2134	upregulated	6	3.44857	0.0318	upregulated	6	1.66947	0.1883
antigen binding	GO	1 out of 8	0.0846294	upregulated	1	5.48749	0.0041	upregulated	1	0.190349	0.8267	downregulated	10	13.4407	1.5e-06	downregulated	7	19.2885	4.2e-09													downregulated	2	0.0846294	0.9189
interstrand cross-link repair	GO	3 out of 8	0.0687985	upregulated	4	1.59797	0.2023	upregulated	4	2.81735	0.0598	downregulated	4	1.45838	0.2326	downregulated	3	1.44727	0.2352	upregulated	1	0.522423	0.5931	downregulated	1	0.307785	0.7351	upregulated	6	1.22624	0.2934	downregulated	6	1.55615	0.2109
endoplasmic reticulum-Golgi intermediate compartment	GO	2 out of 8	0.0560321	upregulated	5	1.17879	0.3077	upregulated	7	2.58585	0.0753	downregulated	8	0.669245	0.5121	downregulated	5	0.652804	0.5206	upregulated	1	0.93976	0.3907	upregulated	7	0.358407	0.6988	downregulated	7	0.473694	0.6227	downregulated	9	0.880505	0.4146
regulation of mitochondrial membrane permeability involved in apoptotic process	GO	2 out of 8	0.0266468	downregulated	1	1.21785	0.2959	upregulated	1	0.616279	0.54					upregulated	1	2.82719	0.0592					upregulated	1	0.479648	0.619	upregulated	1	1.04469	0.3518	upregulated	2	0.674628	0.5093
chemokine binding	GO	1 out of 8	0.0129594	downregulated	1	1.50998	0.2209	upregulated	1	3.5665	0.0283	downregulated	2	0.966245	0.3805													upregulated	1	0.299537	0.7412	upregulated	1	0.77778	0.4594
