# Supplementary material for: Physical Activity Rewires the Human Brain against Neurodegeneration
Source: Int J Mol Sci. 2022 Jun 2;23(11):6223. doi: 10.3390/ijms23116223 (PMC9181322; doi:10.3390/ijms23116223)
Supplement: Supplementary file 1 [file ijms-23-06223-s001.zip › Table S15.xlsx]

## Sheet: Sheet1
Table S15. Functional analysis of genes downregulated in physically active subjects and upregulated in Huntington's disease datasets
Bioset 1: Hippocampi from 76-99yr old female subjects with high physical activity levels _vs_ low (Study: Hippocampi from post-mortem brains of subjects with low, moderate, or high physical activity levels)
Bioset 2: Hippocampi from 76-99yr old female subjects with moderate physical activity levels _vs_ low (Study: Hippocampi from post-mortem brains of subjects with low, moderate, or high physical activity levels)
Bioset 3: Hippocampi from 78-101yr old male subjects with high physical activity levels _vs_ low (Study: Hippocampi from post-mortem brains of subjects with low, moderate, or high physical activity levels)
Bioset 4: Hippocampi from 78-101yr old male subjects with moderate physical activity levels _vs_ low (Study: Hippocampi from post-mortem brains of subjects with low, moderate, or high physical activity levels)
Bioset 5: Caudate Nucleus- Huntingtons disease grade 1 _vs_ control_GPL97 (Study: Huntington's disease - Cerebellum, Caudate nucleus, Motor cortex BA4, and Prefrontal cortex BA9)
Bioset 6: Caudate Nucleus- Huntingtons disease grade 2 _vs_ control_GPL97 (Study: Huntington's disease - Cerebellum, Caudate nucleus, Motor cortex BA4, and Prefrontal cortex BA9)
Bioset 7: Caudate Nucleus- Huntingtons disease grade 3 _vs_ control_GPL97 (Study: Huntington's disease - Cerebellum, Caudate nucleus, Motor cortex BA4, and Prefrontal cortex BA9)
Bioset 8: Caudate Nucleus- Huntingtons disease grade 4 _vs_ control_GPL97 (Study: Huntington's disease - Cerebellum, Caudate nucleus, Motor cortex BA4, and Prefrontal cortex BA9)
Biogroup	Source	Specificity	Overall Biogroup score	Correlated direction - Bioset 1	Common genes - Bioset 1	Score - Bioset 1	p-value - Bioset 1	Correlated direction - Bioset 2	Common genes - Bioset 2	Score - Bioset 2	p-value - Bioset 2	Correlated direction - Bioset 3	Common genes - Bioset 3	Score - Bioset 3	p-value - Bioset 3	Correlated direction - Bioset 4	Common genes - Bioset 4	Score - Bioset 4	p-value - Bioset 4	Correlated direction - Bioset 5	Common genes - Bioset 5	Score - Bioset 5	p-value - Bioset 5	Correlated direction - Bioset 6	Common genes - Bioset 6	Score - Bioset 6	p-value - Bioset 6	Correlated direction - Bioset 7	Common genes - Bioset 7	Score - Bioset 7	p-value - Bioset 7	Correlated direction - Bioset 8	Common genes - Bioset 8	Score - Bioset 8	p-value - Bioset 8
leukocyte degranulation	GO	5 out of 8	96.9227	downregulated	6	0.519363	0.5949	upregulated	25	4.61489	0.0099	downregulated	59	30.4946	5.7e-14	downregulated	60	66.9198	8.7e-30	downregulated	9	1.32628	0.2655	downregulated	18	0.842461	0.4306	upregulated	30	2.0196	0.1327	upregulated	18	3.75291	0.0234
glial cell differentiation	GO	7 out of 8	61.8518	downregulated	4	1.42211	0.2412	upregulated	4	1.31221	0.2692	downregulated	31	31.9491	1.3e-14	downregulated	10	3.89301	0.0204	upregulated	12	10.2217	3.6e-05	upregulated	25	7.87252	0.0004	upregulated	21	2.68202	0.0684	upregulated	13	5.12349	0.006
inflammatory response	GO	5 out of 8	58.6297	downregulated	14	2.78345	0.0618	upregulated	9	3.8379	0.0215	downregulated	46	19.6906	2.8e-09	downregulated	33	37.1568	7.3e-17	downregulated	3	2.57999	0.0758	upregulated	20	2.05346	0.1283	upregulated	20	3.57268	0.0281	upregulated	6	1.84398	0.1582
transcription factor activity, RNA polymerase II proximal promoter sequence-specific DNA binding	GO	7 out of 8	56.7508	upregulated	16	2.35765	0.0946	downregulated	7	0.887748	0.4116	downregulated	32	1.51457	0.2199	downregulated	21	2.23593	0.1069	upregulated	25	18.4249	1e-08	upregulated	55	14.1958	6.8e-07	upregulated	57	12.7055	3e-06	upregulated	43	9.14409	0.0001
positive regulation of leukocyte cell-cell adhesion	GO	8 out of 8	55.3929	downregulated	8	1.95585	0.1414	downregulated	4	3.76929	0.0231	downregulated	26	14.514	5e-07	downregulated	20	23.9426	4e-11	upregulated	4	2.52231	0.0803	upregulated	14	2.52231	0.0803	upregulated	17	3.36691	0.0345	upregulated	9	2.79969	0.0608
gliogenesis	GO	7 out of 8	53.5336	downregulated	4	1.24104	0.2891	upregulated	6	4.37552	0.0126	downregulated	34	29.1351	2.2e-13	downregulated	12	3.3522	0.035	upregulated	13	9.42862	8e-05	upregulated	28	5.95415	0.0026	upregulated	23	2.18327	0.1127	upregulated	17	6.61475	0.0013
regulation of substrate adhesion-dependent cell spreading	GO	7 out of 8	47.9797	downregulated	5	7.27091	0.0007	downregulated	1	3.46815	0.0312	downregulated	13	16.3212	8.2e-08	downregulated	6	5.90183	0.0027	upregulated	3	5.29153	0.005	upregulated	5	5.88369	0.0028	upregulated	4	5.78757	0.0031	downregulated	4	1.94516	0.143
blood vessel morphogenesis	GO	7 out of 8	47.0997	downregulated	13	2.4238	0.0886	upregulated	13	3.48882	0.0305	downregulated	45	19.0097	5.5e-09	downregulated	28	9.91303	5e-05	upregulated	14	5.6537	0.0035	upregulated	31	7.34302	0.0006	upregulated	38	3.84777	0.0213	upregulated	19	2.3975	0.0909
myeloid cell differentiation	GO	8 out of 8	46.9376	downregulated	6	4.02173	0.0179	downregulated	2	3.79939	0.0224	downregulated	23	10.435	2.9e-05	downregulated	15	10.2073	3.7e-05	upregulated	6	4.85895	0.0078	upregulated	17	6.56802	0.0014	upregulated	19	4.06571	0.0172	upregulated	13	2.98149	0.0507
cardiovascular system development	GO	7 out of 8	45.0076	downregulated	17	2.50308	0.0818	upregulated	16	2.65822	0.0701	downregulated	50	14.6237	4.5e-07	downregulated	32	8.42516	0.0002	upregulated	18	5.81442	0.003	upregulated	43	8.51122	0.0002	upregulated	47	3.94189	0.0194	upregulated	31	3.8464	0.0214
transcriptional repressor activity, RNA polymerase II transcription regulatory region sequence-specific DNA binding	GO	8 out of 8	43.0063	downregulated	7	0.563373	0.5693	downregulated	12	8.55513	0.0002	downregulated	22	2.78566	0.0617	downregulated	19	4.47884	0.0113	upregulated	10	5.22813	0.0054	upregulated	30	7.5439	0.0005	upregulated	36	8.52364	0.0002	upregulated	27	5.32758	0.0049
SMAD binding	GO	6 out of 8	41.2097	downregulated	4	4.24347	0.0144	upregulated	2	0.738441	0.4779	upregulated	4	1.2882	0.2758	downregulated	3	0.919415	0.3988	upregulated	5	11.3952	1.1e-05	upregulated	15	11.2147	1.3e-05	upregulated	23	9.7084	6.1e-05	upregulated	13	5.75517	0.0032
growth factor binding	GO	7 out of 8	40.6279	downregulated	6	2.89058	0.0555	upregulated	6	2.09738	0.1228	downregulated	9	5.67007	0.0034	downregulated	6	3.0573	0.047	upregulated	5	5.46665	0.0042	upregulated	19	8.51018	0.0002	upregulated	21	10.3072	3.3e-05	upregulated	14	6.82326	0.0011
peptide antigen binding	GO	2 out of 8	40.3789	upregulated	1	6.57729	0.0014	upregulated	1	0.809985	0.4449	downregulated	9	21.5123	4.5e-10	downregulated	7	26.2539	4e-12
antigen processing and presentation of exogenous antigen	GO	5 out of 8	39.8087	upregulated	4	5.16823	0.0057	upregulated	8	2.15336	0.1161	downregulated	20	21.016	7.5e-10	downregulated	18	22.8964	1.1e-10	upregulated	1	0.655233	0.5193	upregulated	9	0.947818	0.3876	upregulated	8	3.25868	0.0384	downregulated	6	1.6438	0.1932
specific granule membrane	GO	6 out of 8	39.7021	downregulated	2	0.527553	0.59	upregulated	4	1.37002	0.2541	downregulated	15	17.0794	3.8e-08	downregulated	14	17.5727	2.3e-08	upregulated	2	1.28273	0.2773	upregulated	9	1.66956	0.1883	upregulated	10	3.58037	0.0279	downregulated	4	0.640188	0.5272
peptide binding	GO	5 out of 8	39.5785	upregulated	10	5.09996	0.0061	upregulated	9	1.7587	0.1723	downregulated	25	18.3452	1.1e-08	downregulated	23	24.2455	3e-11	upregulated	3	1.24337	0.2884	downregulated	12	1.78357	0.168	upregulated	22	2.45455	0.0859	upregulated	20	1.93214	0.1448
endosome membrane	GO	4 out of 8	39.4199	upregulated	21	3.85013	0.0213	upregulated	22	4.64633	0.0096	downregulated	51	22.6876	1.4e-10	downregulated	44	24.4488	2.4e-11	downregulated	15	2.1236	0.1196	downregulated	30	2.35461	0.0949	upregulated	50	2.42308	0.0886	upregulated	37	2.83515	0.0587
antigen processing and presentation of peptide antigen	GO	5 out of 8	39.0529	upregulated	4	5.04156	0.0065	upregulated	9	2.26451	0.1039	downregulated	20	20.3684	1.4e-09	downregulated	18	22.6633	1.4e-10	upregulated	1	0.579813	0.56	upregulated	8	0.860893	0.4228	upregulated	8	3.14706	0.043	downregulated	6	1.26043	0.2835
regulation of pri-miRNA transcription by RNA polymerase II	GO	8 out of 8	38.6146	downregulated	3	2.50873	0.0814	downregulated	1	1.60629	0.2006	downregulated	4	1.4139	0.2432	downregulated	2	1.73907	0.1757	upregulated	4	5.90668	0.0027	upregulated	9	9.672	6.3e-05	upregulated	11	10.4628	2.9e-05	upregulated	7	5.30507	0.005
positive regulation of substrate adhesion-dependent cell spreading	GO	7 out of 8	38.3948	downregulated	4	6.56113	0.0014	downregulated	1	3.847	0.0213	downregulated	10	15.5946	1.7e-07	downregulated	4	5.62161	0.0036	upregulated	2	3.81446	0.022	upregulated	3	2.91557	0.0542	upregulated	2	1.47815	0.2281	downregulated	3	1.43766	0.2375
glial cell development	GO	6 out of 8	38.2681	upregulated	1	0.272221	0.7617	upregulated	2	1.61026	0.1998	downregulated	19	25.3073	1e-11	downregulated	8	4.94178	0.0071	upregulated	4	2.02679	0.1318	upregulated	12	2.38496	0.0921	upregulated	9	1.61728	0.1984	upregulated	4	3.87239	0.0208
cytokine binding	GO	7 out of 8	36.2379	downregulated	4	1.9936	0.1362	upregulated	4	2.15071	0.1164	downregulated	9	4.64156	0.0096	downregulated	4	2.81862	0.0597	upregulated	2	2.66802	0.0694	upregulated	12	8.25891	0.0003	upregulated	13	14.1316	7.3e-07	upregulated	8	3.87631	0.0207
transcriptional activator activity, RNA polymerase II proximal promoter sequence-specific DNA binding	GO	7 out of 8	36.0447	upregulated	11	3.05386	0.0472	downregulated	2	0.849023	0.4278	downregulated	18	1.66553	0.1891	downregulated	10	1.16872	0.3108	upregulated	17	12.6073	3.3e-06	upregulated	35	10.1363	4e-05	upregulated	37	7.01242	0.0009	upregulated	25	5.65928	0.0035
glial cell fate commitment	GO	5 out of 8	35.885									downregulated	4	7.6099	0.0005					upregulated	4	8.97912	0.0001	upregulated	4	7.21527	0.0007	upregulated	3	5.03257	0.0065	upregulated	3	7.04817	0.0009
cell fate commitment	GO	8 out of 8	35.8762	downregulated	8	1.44355	0.2361	downregulated	3	2.70872	0.0666	downregulated	24	8.93622	0.0001	downregulated	7	1.4006	0.2465	upregulated	10	4.74337	0.0087	upregulated	26	5.02076	0.0066	upregulated	25	4.49754	0.0111	upregulated	20	7.12539	0.0008
regulation of JNK cascade	GO	7 out of 8	35.6274	downregulated	7	5.77069	0.0031	upregulated	6	2.48945	0.083	downregulated	16	7.73433	0.0004	downregulated	11	5.68186	0.0034	upregulated	6	4.26827	0.014	upregulated	17	5.02225	0.0066	upregulated	22	6.55615	0.0014	upregulated	17	3.08327	0.0458
positive regulation of transcription from RNA polymerase II promoter involved in cellular response to chemical stimulus	GO	7 out of 8	35.6183	downregulated	2	3.66463	0.0256	upregulated	1	0.852094	0.4265	downregulated	4	3.83822	0.0215	downregulated	2	3.04528	0.0476	upregulated	1	1.81462	0.1629	upregulated	6	6.7114	0.0012	upregulated	6	8.54647	0.0002	upregulated	6	8.84977	0.0001
regulation of ossification	GO	6 out of 8	35.5173	upregulated	7	1.5203	0.2186	upregulated	6	2.00464	0.1347	downregulated	12	3.49245	0.0304	downregulated	7	1.86599	0.1547	upregulated	6	4.13876	0.0159	upregulated	22	10.1555	3.9e-05	upregulated	23	12.1176	5.5e-06	upregulated	16	5.26732	0.0052
regulation of angiogenesis	GO	6 out of 8	35.1956	downregulated	10	5.93228	0.0027	upregulated	7	4.66838	0.0094	downregulated	26	13.8144	1e-06	downregulated	14	11.9573	6.4e-06	upregulated	8	4.39258	0.0124	upregulated	22	4.80468	0.0082	upregulated	23	2.32128	0.0981	upregulated	14	1.03405	0.3556
exocrine system development	GO	8 out of 8	35.0056	downregulated	3	3.45039	0.0317	downregulated	2	3.56027	0.0284	downregulated	5	4.04673	0.0175	downregulated	3	0.962668	0.3819	upregulated	3	5.41606	0.0044	upregulated	6	6.22951	0.002	upregulated	8	4.02282	0.0179	upregulated	9	7.31718	0.0007
Golgi-associated vesicle membrane	GO	7 out of 8	34.954	upregulated	5	5.21767	0.0054	downregulated	3	1.64218	0.1936	downregulated	13	15.4247	2e-07	downregulated	11	18.6396	8e-09	upregulated	2	0.781793	0.4576	upregulated	7	1.34119	0.2615	upregulated	9	1.77736	0.1691	upregulated	10	0.564835	0.5685
regulation of vasculature development	GO	6 out of 8	34.8507	downregulated	11	5.26791	0.0052	upregulated	8	4.23607	0.0145	downregulated	29	14.1314	7.3e-07	downregulated	17	11.6943	8.3e-06	upregulated	10	4.09127	0.0167	upregulated	27	4.6739	0.0093	upregulated	28	2.49295	0.0827	upregulated	17	0.826282	0.4377
wound healing	GO	6 out of 8	34.5435	upregulated	11	0.90325	0.4053	upregulated	17	4.64768	0.0096	downregulated	42	10.1913	3.7e-05	downregulated	24	8.69604	0.0002	upregulated	17	5.41237	0.0045	upregulated	44	4.4949	0.0112	upregulated	48	6.00439	0.0025	upregulated	29	5.2954	0.005
actin binding	GO	4 out of 8	34.4827	downregulated	11	6.43814	0.0016	downregulated	9	2.93246	0.0533	downregulated	49	15.1364	2.7e-07	downregulated	22	7.66628	0.0005	upregulated	17	6.26961	0.0019	upregulated	47	12.0451	5.9e-06	upregulated	45	5.57574	0.0038	upregulated	34	10.5923	2.5e-05
regulation of bone remodeling	GO	7 out of 8	34.0894	downregulated	1	0.662282	0.5157					downregulated	6	11.9303	6.6e-06	downregulated	5	9.99446	4.6e-05	upregulated	1	2.07264	0.1259	upregulated	5	3.05059	0.0473	upregulated	4	2.733	0.065	upregulated	2	3.64606	0.0261
lymphocyte activation	GO	4 out of 8	33.9593	downregulated	13	2.24178	0.1063	upregulated	7	1.96475	0.1402	downregulated	40	20.7237	1e-09	downregulated	29	19.4164	3.7e-09	downregulated	6	3.31142	0.0365	downregulated	9	2.69209	0.0677	downregulated	8	2.69272	0.0677	upregulated	14	2.23837	0.1066
pattern specification process	GO	8 out of 8	33.8427	downregulated	12	3.30132	0.0368	downregulated	6	2.25666	0.1047	downregulated	23	4.68378	0.0092	downregulated	14	1.59861	0.2022	upregulated	10	3.17285	0.0419	upregulated	37	7.30113	0.0007	upregulated	43	6.33805	0.0018	upregulated	28	5.19032	0.0056
salivary gland morphogenesis	GO	8 out of 8	33.2523	downregulated	2	1.66368	0.1894	downregulated	2	3.83779	0.0215	downregulated	4	3.69972	0.0247	downregulated	2	0.692785	0.5002	upregulated	3	6.17727	0.0021	upregulated	5	5.39661	0.0045	upregulated	7	5.11152	0.006	upregulated	6	6.6729	0.0013
reactive oxygen species metabolic process	GO	6 out of 8	33.1835	upregulated	1	1.02499	0.3588	upregulated	2	1.81285	0.1632	downregulated	11	6.64247	0.0013	downregulated	10	9.95007	4.8e-05	upregulated	3	4.30301	0.0135	upregulated	8	4.9257	0.0073	upregulated	6	4.25731	0.0142	upregulated	6	5.94275	0.0026
positive regulation of vascular associated smooth muscle cell migration	GO	7 out of 8	33.1237	downregulated	1	4.8997	0.0074					downregulated	1	4.14596	0.0158	downregulated	2	6.64664	0.0013	upregulated	2	3.12928	0.0437	upregulated	4	6.60626	0.0014	upregulated	3	4.03144	0.0177	upregulated	4	3.66441	0.0256
connective tissue development	GO	7 out of 8	33.071	downregulated	9	2.12057	0.12	upregulated	5	3.34669	0.0352	downregulated	9	0.806983	0.4462	downregulated	6	2.96619	0.0515	upregulated	8	5.00766	0.0067	upregulated	25	10.6229	2.4e-05	upregulated	23	8.35407	0.0002	upregulated	20	6.53935	0.0014
ensheathment of neurons	GO	4 out of 8	32.9411	upregulated	1	2.57059	0.0765	downregulated	3	2.22616	0.1079	downregulated	26	34.0671	1.6e-15	downregulated	11	10.836	2e-05	upregulated	4	2.91392	0.0543	downregulated	6	6.94944	0.001	downregulated	6	5.61332	0.0036	downregulated	6	1.96876	0.1396
axon ensheathment	GO	4 out of 8	32.9411	upregulated	1	2.57059	0.0765	downregulated	3	2.22616	0.1079	downregulated	26	34.0671	1.6e-15	downregulated	11	10.836	2e-05	upregulated	4	2.91392	0.0543	downregulated	6	6.94944	0.001	downregulated	6	5.61332	0.0036	downregulated	6	1.96876	0.1396
transcriptional repressor activity, RNA polymerase II proximal promoter sequence-specific DNA binding	GO	8 out of 8	32.5668	downregulated	4	0.521564	0.5936	downregulated	6	3.73324	0.0239	downregulated	13	1.93184	0.1449	downregulated	11	2.89666	0.0552	upregulated	8	6.3216	0.0018	upregulated	20	5.24412	0.0053	upregulated	20	6.16012	0.0021	upregulated	17	5.75767	0.0032
RNA polymerase II proximal promoter sequence-specific DNA binding	GO	6 out of 8	32.4152	downregulated	18	2.38096	0.0925	downregulated	5	0.463851	0.6289	downregulated	37	1.20696	0.2991	upregulated	4	1.12337	0.3252	upregulated	19	8.15797	0.0003	upregulated	58	8.6093	0.0002	upregulated	66	8.98512	0.0001	upregulated	44	6.11536	0.0022
external side of plasma membrane	GO	7 out of 8	31.9595	downregulated	6	1.10836	0.3301	upregulated	7	4.81451	0.0081	downregulated	24	10.8146	2e-05	downregulated	18	11.4965	1e-05	upregulated	5	1.90363	0.149	upregulated	19	3.40524	0.0332	upregulated	18	5.1826	0.0056	upregulated	11	2.86309	0.0571
T cell activation	GO	6 out of 8	31.7795	downregulated	7	2.3075	0.0995	upregulated	5	2.85715	0.0574	downregulated	25	13.8299	9.9e-07	downregulated	17	13.2904	1.7e-06	upregulated	5	2.46602	0.0849	upregulated	14	2.46602	0.0849	downregulated	4	2.46602	0.0849	upregulated	10	2.74278	0.0644
negative regulation of pri-miRNA transcription by RNA polymerase II	GO	8 out of 8	31.7516	downregulated	1	1.3399	0.2619	downregulated	1	2.78604	0.0617	downregulated	2	1.50301	0.2225	downregulated	1	1.10053	0.3327	upregulated	2	4.50643	0.011	upregulated	5	9.45912	7.8e-05	upregulated	5	7.02863	0.0009	upregulated	3	4.02798	0.0178
antigen processing and presentation	GO	3 out of 8	31.321	upregulated	6	4.88943	0.0075	upregulated	10	2.1832	0.1127	downregulated	22	18.9009	6.2e-09	downregulated	19	21.3725	5.2e-10	downregulated	2	1.01291	0.3632	downregulated	9	1.34295	0.2611	upregulated	11	2.99423	0.0501	downregulated	8	2.51814	0.0806
ammonium transmembrane transport	GO	8 out of 8	31.2977	downregulated	2	3.5459	0.0288	downregulated	1	1.84661	0.1578	downregulated	2	4.18521	0.0152	downregulated	3	5.78599	0.0031	upregulated	2	4.13722	0.016	upregulated	5	3.54716	0.0288	upregulated	5	2.81069	0.0602	upregulated	6	5.43893	0.0043
muscle cell proliferation	GO	7 out of 8	31.264	downregulated	1	1.01683	0.3617					downregulated	1	0.606957	0.545	downregulated	1	1.12694	0.324	upregulated	3	8.71698	0.0002	upregulated	6	7.04264	0.0009	upregulated	6	5.7029	0.0033	upregulated	5	7.05079	0.0009
thymic T cell selection	GO	6 out of 8	31.0709	upregulated	1	0.826196	0.4377					downregulated	2	6.13218	0.0022	downregulated	2	5.69263	0.0034	upregulated	2	5.04733	0.0064	upregulated	2	5.04733	0.0064	upregulated	2	4.64343	0.0096	upregulated	2	5.33423	0.0048
development of primary sexual characteristics	GO	7 out of 8	30.9284	downregulated	4	2.87808	0.0562	upregulated	7	5.40396	0.0045	downregulated	12	3.71867	0.0243	downregulated	12	2.92128	0.0539	upregulated	8	8.09091	0.0003	upregulated	16	7.02006	0.0009	upregulated	26	6.17498	0.0021	upregulated	14	5.52839	0.004
lymphocyte differentiation	GO	7 out of 8	30.8865	downregulated	8	1.59258	0.2034	upregulated	3	2.78424	0.0618	downregulated	27	11.9609	6.4e-06	downregulated	14	8.79026	0.0002	upregulated	7	2.88468	0.0559	upregulated	19	2.46022	0.0854	upregulated	23	3.27417	0.0378	upregulated	11	2.70792	0.0667
cartilage development	GO	7 out of 8	30.8529	downregulated	8	2.39708	0.091	upregulated	5	3.60208	0.0273	downregulated	7	0.972632	0.3781	downregulated	5	3.43283	0.0323	upregulated	6	3.66755	0.0255	upregulated	19	9.5902	6.8e-05	upregulated	19	6.92969	0.001	upregulated	17	7.46503	0.0006
regulation of lymphocyte activation	GO	4 out of 8	30.689	upregulated	7	1.42777	0.2398	downregulated	6	2.22099	0.1085	downregulated	46	16.7567	5.3e-08	downregulated	28	18.5696	8.6e-09	downregulated	7	3.3619	0.0347	downregulated	13	2.38977	0.0917	downregulated	17	1.81134	0.1634	upregulated	18	2.13248	0.1185
transcriptional activator activity, RNA polymerase II transcription regulatory region sequence-specific DNA binding	GO	6 out of 8	30.6035	upregulated	14	2.38823	0.0918	downregulated	4	0.588054	0.5554	upregulated	8	3.20145	0.0407	downregulated	20	1.8459	0.1579	upregulated	19	9.694	6.2e-05	upregulated	43	10.5811	2.5e-05	upregulated	47	6.7336	0.0012	upregulated	30	4.36227	0.0127
myelination	GO	3 out of 8	30.3323	upregulated	1	2.61705	0.073	upregulated	2	0.881783	0.414	downregulated	26	34.7313	8.2e-16	downregulated	11	11.1437	1.4e-05	upregulated	4	3.09778	0.0451	downregulated	6	7.0537	0.0009	downregulated	6	5.96108	0.0026	downregulated	5	2.12681	0.1192
limb morphogenesis	GO	7 out of 8	30.2543	downregulated	6	1.26606	0.2819	downregulated	2	2.08877	0.1238	downregulated	8	2.57014	0.0765	upregulated	3	1.89411	0.1505	upregulated	6	4.74961	0.0087	upregulated	21	5.70956	0.0033	upregulated	25	10.1342	4e-05	upregulated	19	5.63	0.0036
skin epidermis development	GO	7 out of 8	29.8575	upregulated	3	1.48298	0.227	downregulated	2	3.27009	0.038	downregulated	10	6.41319	0.0016	downregulated	6	3.47972	0.0308	upregulated	4	3.69494	0.0248	upregulated	12	5.06792	0.0063	upregulated	14	4.64901	0.0096	upregulated	10	4.76563	0.0085
cortical actin cytoskeleton	GO	6 out of 8	29.7738	downregulated	4	4.13828	0.016	upregulated	2	0.488425	0.6136	downregulated	14	10.5079	2.7e-05	downregulated	5	1.60949	0.2	upregulated	8	7.39053	0.0006	upregulated	12	4.75994	0.0086	upregulated	12	1.85611	0.1563	upregulated	8	1.0998	0.3329
sex differentiation	GO	7 out of 8	29.5136	downregulated	6	2.46737	0.0848	upregulated	8	4.81125	0.0081	downregulated	14	2.8215	0.0595	downregulated	12	1.66649	0.1889	upregulated	9	7.01286	0.0009	upregulated	20	7.42474	0.0006	upregulated	31	6.65879	0.0013	upregulated	18	6.27305	0.0019
amyloid-beta clearance	GO	5 out of 8	29.4641									downregulated	4	11.0243	1.6e-05	downregulated	4	15.5365	1.8e-07					upregulated	1	0.781742	0.4576	upregulated	2	0.910546	0.4023	upregulated	2	1.21111	0.2979
organic hydroxy compound metabolic process	GO	6 out of 8	29.3539	downregulated	9	3.36714	0.0345	upregulated	15	4.08788	0.0168	downregulated	31	11.2645	1.3e-05	downregulated	27	13.961	8.6e-07	downregulated	13	2.26915	0.1034	upregulated	14	3.35838	0.0348	upregulated	15	1.56192	0.2097	upregulated	16	2.19802	0.111
dorsal/ventral pattern formation	GO	6 out of 8	29.2109	upregulated	1	0.0426825	0.9582	upregulated	2	0.539222	0.5832	downregulated	4	4.5747	0.0103	downregulated	3	1.7808	0.1685	upregulated	4	4.0214	0.0179	upregulated	9	5.93279	0.0027	upregulated	10	5.2014	0.0055	upregulated	6	8.28171	0.0003
defense response to Gram-positive bacterium	GO	7 out of 8	29.1761	downregulated	1	0.330568	0.7185	upregulated	1	2.56722	0.0767	downregulated	9	9.98003	4.6e-05	downregulated	8	13.955	8.7e-07	upregulated	1	2.08355	0.1245	upregulated	1	1.27612	0.2791	upregulated	2	4.10638	0.0165	upregulated	1	0.0116829	0.9884
trabecula morphogenesis	GO	7 out of 8	28.7818	downregulated	5	4.71777	0.0089					downregulated	3	1.75846	0.1723	downregulated	4	2.06494	0.1268	upregulated	2	3.36686	0.0345	upregulated	8	7.15955	0.0008	upregulated	9	6.27253	0.0019	upregulated	5	3.4417	0.032
vacuole organization	GO	6 out of 8	28.7128	upregulated	5	1.03088	0.3567	upregulated	4	0.72646	0.4836	downregulated	16	9.87863	5.1e-05	downregulated	11	4.6632	0.0094	upregulated	6	4.62317	0.0098	upregulated	9	5.21026	0.0055	upregulated	12	3.72834	0.024	upregulated	9	2.36652	0.0938
regulation of extracellular matrix organization	GO	7 out of 8	28.6897	downregulated	3	3.09171	0.0454	upregulated	1	0.366894	0.6929	downregulated	6	5.80644	0.003	downregulated	2	0.750321	0.4722	upregulated	3	4.5365	0.0107	upregulated	4	6.81517	0.0011	upregulated	6	5.68886	0.0034	upregulated	5	2.36756	0.0937
integrin complex	GO	7 out of 8	28.6094	downregulated	2	2.50081	0.082					downregulated	5	8.04886	0.0003	downregulated	5	9.41128	8.2e-05	upregulated	1	1.35231	0.2586	upregulated	2	2.46182	0.0853	upregulated	3	2.37254	0.0932	upregulated	1	2.46182	0.0853
stem cell differentiation	GO	6 out of 8	28.3809	upregulated	9	2.15895	0.1154	upregulated	5	2.55874	0.0774	downregulated	21	18.8438	6.5e-09	downregulated	4	0.511967	0.5993	upregulated	6	4.85418	0.0078	upregulated	18	6.09286	0.0023	upregulated	15	1.71101	0.1807	upregulated	13	1.08476	0.338
clathrin adaptor activity	GO	7 out of 8	28.1831	downregulated	2	3.90665	0.0201	downregulated	1	1.66351	0.1895	downregulated	3	5.86073	0.0028					upregulated	2	5.32349	0.0049	upregulated	2	4.39669	0.0123	upregulated	2	3.1099	0.0446	upregulated	1	3.92216	0.0198
endocytic adaptor activity	GO	7 out of 8	28.1831	downregulated	2	3.90665	0.0201	downregulated	1	1.66351	0.1895	downregulated	3	5.86073	0.0028					upregulated	2	5.32349	0.0049	upregulated	2	4.39669	0.0123	upregulated	2	3.1099	0.0446	upregulated	1	3.92216	0.0198
epidermis development	GO	8 out of 8	28.1257	downregulated	6	0.752719	0.4711	downregulated	5	2.07077	0.1261	downregulated	20	5.09275	0.0061	downregulated	8	1.93388	0.1446	upregulated	9	4.11875	0.0163	upregulated	21	6.01321	0.0024	upregulated	27	3.87523	0.0207	upregulated	17	4.26837	0.014
establishment of spindle orientation	GO	6 out of 8	27.9736	upregulated	1	2.5402	0.0789	upregulated	1	0.694333	0.4994	downregulated	6	6.54457	0.0014	downregulated	4	5.12262	0.006	upregulated	4	7.04416	0.0009	upregulated	5	4.49843	0.0111	upregulated	4	1.98443	0.1375	upregulated	1	3.47372	0.031
embryonic appendage morphogenesis	GO	7 out of 8	27.9168	downregulated	6	1.76344	0.1715	downregulated	2	2.22652	0.1079	downregulated	7	2.86805	0.0568	upregulated	2	1.1688	0.3107	upregulated	5	3.60507	0.0272	upregulated	18	5.65643	0.0035	upregulated	22	8.79875	0.0002	upregulated	15	4.16733	0.0155
water transmembrane transporter activity	GO	4 out of 8	27.856	upregulated	1	0.776522	0.46													upregulated	2	7.41171	0.0006	upregulated	2	7.41171	0.0006	upregulated	2	6.31368	0.0018	upregulated	2	6.71886	0.0012
macrophage activation	GO	4 out of 8	27.7726	downregulated	1	0.711751	0.4908	upregulated	4	10.9457	1.8e-05	downregulated	6	8.34635	0.0002	downregulated	9	26.4771	3.2e-12	upregulated	1	3.28118	0.0376	upregulated	3	3.65472	0.0259	upregulated	3	2.53377	0.0794	upregulated	1	3.18308	0.0415
cargo receptor activity	GO	8 out of 8	27.6397	downregulated	4	3.67169	0.0254	downregulated	3	2.6106	0.0735	downregulated	9	6.03743	0.0024	downregulated	4	3.32758	0.0359	upregulated	3	2.65279	0.0705	upregulated	9	3.00635	0.0495	upregulated	9	3.70572	0.0246	upregulated	6	2.62758	0.0723
myeloid cell homeostasis	GO	4 out of 8	27.6003	downregulated	3	6.17091	0.0021	upregulated	2	0.313895	0.7306	downregulated	10	3.173	0.0419	downregulated	5	2.47313	0.0843	upregulated	5	5.08797	0.0062	upregulated	9	7.59187	0.0005	upregulated	16	9.39644	8.3e-05	upregulated	12	5.52405	0.004
neutrophil migration	GO	7 out of 8	27.5747	downregulated	3	1.55942	0.2103	upregulated	1	0.743002	0.4757	downregulated	13	10.3991	3e-05	downregulated	7	9.08041	0.0001	upregulated	2	2.97757	0.0509	upregulated	3	2.39829	0.0909	upregulated	5	0.93067	0.3943	upregulated	2	0.972254	0.3782
defense response to bacterium	GO	6 out of 8	27.5352	downregulated	7	2.35511	0.0949	upregulated	6	5.76537	0.0031	downregulated	17	10.7125	2.2e-05	downregulated	14	15.5562	1.8e-07	upregulated	1	1.15693	0.3145	upregulated	6	0.473576	0.6228	upregulated	6	3.08419	0.0458	downregulated	3	0.0379504	0.9628
lung development	GO	7 out of 8	27.2566	downregulated	4	3.05018	0.0474	upregulated	8	3.69894	0.0247	downregulated	16	6.67227	0.0013	downregulated	10	4.93011	0.0072	upregulated	8	4.52616	0.0108	upregulated	16	6.17752	0.0021	upregulated	20	3.6896	0.025	upregulated	12	1.90972	0.1481
regulation of cell division	GO	7 out of 8	27.0797	downregulated	2	1.86149	0.1554	downregulated	3	5.95711	0.0026	downregulated	17	6.10254	0.0022	downregulated	7	3.23803	0.0392	upregulated	5	3.02615	0.0485	upregulated	9	3.27478	0.0378	upregulated	16	3.61959	0.0268	downregulated	5	2.60573	0.0738
cytoskeleton-dependent cytokinesis	GO	6 out of 8	27.0764	upregulated	4	1.44579	0.2356	upregulated	2	0.386726	0.6793	downregulated	8	4.62408	0.0098	downregulated	5	1.65868	0.1904	upregulated	6	6.96902	0.0009	upregulated	14	6.16162	0.0021	upregulated	12	4.96744	0.007	upregulated	9	4.52812	0.0108
regulation of peptidyl-tyrosine phosphorylation	GO	6 out of 8	27.0406	downregulated	5	1.45844	0.2326	upregulated	8	1.47955	0.2277	downregulated	20	9.36801	8.5e-05	downregulated	21	14.8109	3.7e-07	upregulated	3	0.522777	0.5929	downregulated	15	0.686481	0.5033	upregulated	17	2.65614	0.0702	upregulated	7	0.390325	0.6768
response to BMP	GO	5 out of 8	26.9151	upregulated	9	6.84686	0.0011	downregulated	1	2.46505	0.085	upregulated	5	1.90962	0.1481	upregulated	2	3.01651	0.049	upregulated	4	5.20108	0.0055	upregulated	11	11.0575	1.6e-05	upregulated	14	11.108	1.5e-05	upregulated	12	8.85645	0.0001
cellular response to BMP stimulus	GO	5 out of 8	26.9151	upregulated	9	6.84686	0.0011	downregulated	1	2.46505	0.085	upregulated	5	1.90962	0.1481	upregulated	2	3.01651	0.049	upregulated	4	5.20108	0.0055	upregulated	11	11.0575	1.6e-05	upregulated	14	11.108	1.5e-05	upregulated	12	8.85645	0.0001
protein complex involved in cell adhesion	GO	7 out of 8	26.8999	downregulated	2	2.35195	0.0952					downregulated	5	7.36458	0.0006	downregulated	5	8.94006	0.0001	upregulated	1	1.25938	0.2838	upregulated	2	2.35759	0.0946	upregulated	3	2.2688	0.1034	upregulated	1	2.35759	0.0946
cytokinetic process	GO	7 out of 8	26.7996	downregulated	1	1.65786	0.1905					downregulated	3	4.50042	0.0111	downregulated	2	2.74514	0.0642	upregulated	2	5.11309	0.006	upregulated	5	6.2865	0.0019	upregulated	5	4.58498	0.0102	upregulated	3	1.91164	0.1478
asymmetric stem cell division	GO	6 out of 8	26.5182	upregulated	1	1.07341	0.3418	downregulated	1	4.82294	0.008	downregulated	1	1.67922	0.1865	downregulated	2	3.27727	0.0377					upregulated	4	5.63883	0.0036	upregulated	4	6.50007	0.0015	upregulated	4	5.67327	0.0034
gonad development	GO	7 out of 8	26.5008	downregulated	4	2.93951	0.0529	upregulated	7	5.48885	0.0041	downregulated	11	3.86469	0.021	downregulated	11	2.4813	0.0836	upregulated	7	6.51044	0.0015	upregulated	15	6.35538	0.0017	upregulated	25	5.67288	0.0034	upregulated	13	4.16546	0.0155
walking behavior	GO	6 out of 8	26.4925	downregulated	2	4.67176	0.0094					downregulated	4	4.97296	0.0069	downregulated	4	6.18006	0.0021	upregulated	1	2.7961	0.061	upregulated	5	5.76204	0.0031	upregulated	4	2.10957	0.1213	upregulated	2	1.40048	0.2465
heart trabecula morphogenesis	GO	7 out of 8	26.3983	downregulated	4	4.30518	0.0135					downregulated	1	0.864758	0.4212	downregulated	4	2.97474	0.0511	upregulated	2	3.85593	0.0212	upregulated	6	6.23781	0.002	upregulated	7	5.83853	0.0029	upregulated	3	2.32139	0.0981
leukocyte migration	GO	7 out of 8	26.3887	downregulated	5	0.583517	0.5579	upregulated	13	6.15525	0.0021	downregulated	29	12.3454	4.3e-06	downregulated	19	16.6218	6e-08	upregulated	2	0.695324	0.4989	upregulated	12	1.04103	0.3531	upregulated	19	0.819537	0.4406	upregulated	7	0.437269	0.6458
lipid transport	GO	7 out of 8	26.272	downregulated	7	1.79079	0.1668	upregulated	13	2.4211	0.0888	downregulated	21	6.66698	0.0013	downregulated	15	9.71997	6e-05	upregulated	6	2.10663	0.1216	upregulated	17	1.70267	0.1822	upregulated	17	2.65794	0.0701	upregulated	12	4.04814	0.0175
respiratory tube development	GO	7 out of 8	26.2589	downregulated	4	3.00344	0.0496	upregulated	8	3.5519	0.0287	downregulated	16	6.41395	0.0016	downregulated	10	4.78099	0.0084	upregulated	8	4.35539	0.0128	upregulated	16	6.03848	0.0024	upregulated	20	3.43972	0.0321	upregulated	13	1.77879	0.1688
membrane invagination	GO	7 out of 8	26.1886	downregulated	5	4.58101	0.0102	downregulated	1	3.31728	0.0363	downregulated	10	5.34294	0.0048	downregulated	9	9.81946	5.4e-05					upregulated	6	1.02715	0.358	upregulated	6	1.15402	0.3154	upregulated	5	0.946693	0.388
reproductive structure development	GO	7 out of 8	26.0812	downregulated	13	5.33891	0.0048	upregulated	12	3.56017	0.0284	downregulated	26	4.55242	0.0105	downregulated	26	5.75931	0.0032	upregulated	9	3.62184	0.0267	upregulated	26	3.67256	0.0254	upregulated	38	2.34962	0.0954	upregulated	26	4.34672	0.0129
hair cycle process	GO	7 out of 8	25.9695	upregulated	3	1.4574	0.2328	downregulated	2	3.23492	0.0394	downregulated	9	5.09036	0.0062	downregulated	6	3.31526	0.0363	upregulated	3	2.31341	0.0989	upregulated	11	5.01587	0.0066	upregulated	13	3.78356	0.0227	upregulated	10	4.67355	0.0093
polyol metabolic process	GO	7 out of 8	25.95	downregulated	4	4.66815	0.0094	upregulated	2	1.99457	0.1361	downregulated	9	6.89577	0.001	downregulated	5	3.76264	0.0232	upregulated	1	3.18266	0.0415	upregulated	5	3.18266	0.0415	upregulated	3	2.78765	0.0616	upregulated	6	3.4651	0.0313
intrinsic component of endoplasmic reticulum membrane	GO	5 out of 8	25.8358	upregulated	3	5.02192	0.0066	upregulated	7	1.10376	0.3316	downregulated	15	13.3354	1.6e-06	downregulated	15	17.0892	3.8e-08	upregulated	1	0.135895	0.8729	upregulated	5	0.87525	0.4168	upregulated	12	0.697579	0.4978	downregulated	2	0.171843	0.8421
regeneration	GO	7 out of 8	25.7984	downregulated	3	0.413523	0.6613	upregulated	4	3.72913	0.024	downregulated	16	6.15768	0.0021	downregulated	10	6.68734	0.0012	upregulated	5	3.48793	0.0306	upregulated	12	5.18161	0.0056	upregulated	16	4.37105	0.0126	upregulated	11	3.22843	0.0396
reproductive system development	GO	7 out of 8	25.7796	downregulated	13	5.31019	0.0049	upregulated	12	3.54102	0.029	downregulated	26	4.47979	0.0113	downregulated	26	5.66994	0.0034	upregulated	9	3.58338	0.0278	upregulated	26	3.64436	0.0261	upregulated	38	2.3201	0.0983	upregulated	26	4.31287	0.0134
ERBB2 signaling pathway	GO	6 out of 8	25.7664	upregulated	2	0.66106	0.5163	upregulated	1	0.886455	0.4121	downregulated	2	5.48694	0.0041	downregulated	3	1.61653	0.1986	upregulated	3	5.34762	0.0048	upregulated	7	6.27099	0.0019	upregulated	5	4.23532	0.0145	upregulated	4	4.35651	0.0128
HMG box domain binding	GO	6 out of 8	25.6592	upregulated	1	4.21007	0.0148					downregulated	4	5.91812	0.0027	downregulated	2	3.19957	0.0408	upregulated	3	5.21745	0.0054	upregulated	4	7.1002	0.0008	upregulated	4	4.37634	0.0126	upregulated	4	4.05759	0.0173
regulation of gliogenesis	GO	7 out of 8	25.6238	downregulated	2	1.58668	0.2046	upregulated	6	6.20511	0.002	downregulated	18	18.8089	6.8e-09	downregulated	10	6.02152	0.0024	upregulated	2	1.01912	0.3609	upregulated	9	2.14547	0.117	upregulated	5	1.47154	0.2296	upregulated	3	0.775724	0.4604
negative regulation of leukocyte apoptotic process	GO	6 out of 8	25.5612	upregulated	1	1.24366	0.2883					downregulated	5	3.79144	0.0226	downregulated	4	4.11023	0.0164	upregulated	1	4.18041	0.0153	upregulated	5	4.18041	0.0153	upregulated	4	6.07614	0.0023	upregulated	3	4.4662	0.0115
antibiotic metabolic process	GO	7 out of 8	25.5525	downregulated	4	4.56499	0.0104	upregulated	3	0.996949	0.369	downregulated	9	3.35071	0.0351	downregulated	10	7.21905	0.0007	upregulated	1	2.78161	0.0619	upregulated	5	2.4212	0.0888	upregulated	6	1.54948	0.2124	upregulated	5	3.66545	0.0256
megakaryocyte development	GO	6 out of 8	25.4646									downregulated	4	7.07167	0.0008	downregulated	3	7.22622	0.0007	upregulated	1	3.89276	0.0204	upregulated	3	3.04369	0.0477	upregulated	3	3.74393	0.0237	upregulated	1	0.486359	0.6149
cis-Golgi network	GO	4 out of 8	25.31					upregulated	1	2.10356	0.122	downregulated	8	5.56024	0.0038	upregulated	2	2.98572	0.0505	upregulated	4	5.16997	0.0057	upregulated	8	6.83217	0.0011	upregulated	11	6.78318	0.0011	upregulated	6	6.52463	0.0015
stem cell division	GO	7 out of 8	25.19	upregulated	2	0.701532	0.4958	downregulated	2	4.3545	0.0128	downregulated	3	4.63723	0.0097	downregulated	3	3.33829	0.0355	upregulated	2	3.47866	0.0308	upregulated	6	3.14511	0.0431	upregulated	9	3.87159	0.0208	upregulated	7	3.06612	0.0466
myeloid cell development	GO	6 out of 8	25.1325	downregulated	1	2.21519	0.1091					downregulated	8	5.95433	0.0026	downregulated	7	10.5515	2.6e-05	upregulated	2	2.69962	0.0672	upregulated	6	2.16501	0.1147	upregulated	7	3.26719	0.0381	downregulated	2	1.72035	0.179
establishment of mitotic spindle localization	GO	7 out of 8	24.9733	downregulated	1	1.85016	0.1572	upregulated	1	0.749244	0.4727	downregulated	6	6.96185	0.0009	downregulated	3	3.54785	0.0288	upregulated	3	5.10388	0.0061	upregulated	4	3.01959	0.0488	upregulated	3	1.71069	0.1807	upregulated	1	3.52849	0.0293
neurotransmitter metabolic process	GO	6 out of 8	24.9493	downregulated	3	4.0988	0.0166	upregulated	3	0.442767	0.6423	upregulated	6	4.20753	0.0149	downregulated	5	5.22666	0.0054	upregulated	2	3.20114	0.0407	upregulated	6	4.12826	0.0161	upregulated	7	4.00886	0.0182	upregulated	7	4.72831	0.0088
regulation of organ growth	GO	7 out of 8	24.712	upregulated	6	3.97103	0.0189	downregulated	3	1.68436	0.1856	downregulated	8	4.7784	0.0084	downregulated	6	2.64051	0.0713	upregulated	4	4.2789	0.0139	upregulated	11	5.5978	0.0037	upregulated	15	7.44821	0.0006	upregulated	9	2.25481	0.1049
epidermis morphogenesis	GO	8 out of 8	24.5195	downregulated	2	1.8526	0.1568	downregulated	1	4.25386	0.0142	downregulated	5	5.51503	0.004	downregulated	1	3.40324	0.0333	upregulated	1	1.86531	0.1548	upregulated	3	3.15618	0.0426	upregulated	4	2.85487	0.0576	upregulated	3	1.61846	0.1982
Fc receptor signaling pathway	GO	6 out of 8	24.4357	downregulated	7	2.87816	0.0562	downregulated	1	2.52194	0.0803	downregulated	18	8.22319	0.0003	downregulated	17	10.6847	2.3e-05	upregulated	1	1.73603	0.1762	downregulated	7	1.38607	0.2501	downregulated	7	0.916943	0.3997	upregulated	6	0.694722	0.4992
positive regulation of protein serine/threonine kinase activity	GO	7 out of 8	24.2231	downregulated	5	2.88677	0.0558	upregulated	8	1.26202	0.2831	downregulated	20	7.78524	0.0004	downregulated	20	6.34994	0.0017	upregulated	8	2.47007	0.0846	upregulated	22	2.07228	0.1259	upregulated	31	1.57183	0.2077	upregulated	19	1.08697	0.3372
regulation of Wnt signaling pathway	GO	7 out of 8	24.1623	downregulated	8	1.01092	0.3639	upregulated	7	0.850841	0.4271	downregulated	26	4.98636	0.0068	downregulated	12	1.52478	0.2177	upregulated	12	4.10362	0.0165	upregulated	34	5.05409	0.0064	upregulated	40	3.62213	0.0267	upregulated	36	4.71126	0.009
peptide-lysine-N-acetyltransferase activity	GO	6 out of 8	24.1317	upregulated	3	0.385946	0.6798	upregulated	5	3.25796	0.0385	downregulated	4	0.465889	0.6276	downregulated	2	0.298354	0.742	upregulated	2	2.10556	0.1218	upregulated	13	5.7683	0.0031	upregulated	14	7.2608	0.0007	upregulated	15	11.8767	7e-06
establishment of spindle localization	GO	6 out of 8	24.1083	upregulated	1	2.23663	0.1068	upregulated	1	0.48789	0.6139	downregulated	7	6.03378	0.0024	downregulated	4	4.03664	0.0177	upregulated	4	6.26416	0.0019	upregulated	7	3.60328	0.0272	upregulated	6	1.45068	0.2344	upregulated	3	3.20769	0.0405
axoneme	GO	4 out of 8	24.0995	upregulated	8	2.97849	0.0509	downregulated	1	0.10522	0.9001	downregulated	1	1.48897	0.2256	upregulated	2	1.58623	0.2047	upregulated	3	2.42524	0.0885	upregulated	17	5.45077	0.0043	upregulated	26	13.02	2.2e-06	upregulated	13	3.20358	0.0406
defense response to other organism	GO	7 out of 8	24.0344	downregulated	12	2.30809	0.0995	upregulated	20	10.5651	2.6e-05	downregulated	28	6.71458	0.0012	downregulated	21	12.2416	4.8e-06	upregulated	5	0.605988	0.5455	upregulated	23	3.11244	0.0445	upregulated	24	5.65088	0.0035	upregulated	11	3.96594	0.019
embryonic organ morphogenesis	GO	7 out of 8	24.0096	downregulated	11	3.80308	0.0223	downregulated	5	3.049	0.0474	downregulated	19	3.06654	0.0466	upregulated	1	0.583276	0.5581	upregulated	9	5.11812	0.006	upregulated	23	4.72538	0.0089	upregulated	26	2.94525	0.0526	upregulated	15	1.88548	0.1518
ficolin-1-rich granule membrane	GO	6 out of 8	23.8768	downregulated	1	0.451306	0.6368	upregulated	5	3.47996	0.0308	downregulated	5	6.32526	0.0018	downregulated	7	14.4428	5.3e-07					upregulated	1	0.0455255	0.9555	upregulated	3	0.236345	0.7895	upregulated	3	5.85552	0.0029
molting cycle	GO	7 out of 8	23.8179	upregulated	3	1.11067	0.3293	downregulated	2	3.13652	0.0434	downregulated	9	4.19823	0.015	downregulated	6	2.87181	0.0566	upregulated	3	2.16194	0.1151	upregulated	11	4.83974	0.0079	upregulated	13	3.35563	0.0349	upregulated	10	4.36472	0.0127
hair cycle	GO	7 out of 8	23.8179	upregulated	3	1.11067	0.3293	downregulated	2	3.13652	0.0434	downregulated	9	4.19823	0.015	downregulated	6	2.87181	0.0566	upregulated	3	2.16194	0.1151	upregulated	11	4.83974	0.0079	upregulated	13	3.35563	0.0349	upregulated	10	4.36472	0.0127
RNA polymerase II transcription factor binding	GO	7 out of 8	23.7875	downregulated	4	1.98473	0.1374	upregulated	4	1.51768	0.2192	downregulated	11	2.32326	0.098	downregulated	8	2.36652	0.0938	upregulated	4	2.67741	0.0687	upregulated	18	7.65601	0.0005	upregulated	23	6.96966	0.0009	upregulated	15	1.32756	0.2651
establishment of cell polarity	GO	7 out of 8	23.7343	upregulated	5	2.65315	0.0704	downregulated	3	2.86664	0.0569	downregulated	15	7.21225	0.0007	downregulated	9	4.90094	0.0074	upregulated	4	3.60895	0.0271	upregulated	11	2.50122	0.082	upregulated	14	3.03223	0.0482	upregulated	6	2.26525	0.1038
extracellular matrix organization	GO	7 out of 8	23.6696	downregulated	10	1.80122	0.1651	upregulated	7	0.997439	0.3688	downregulated	25	6.751	0.0012	downregulated	16	8.42586	0.0002	upregulated	5	0.794158	0.452	upregulated	23	3.025	0.0486	upregulated	21	3.00294	0.0496	upregulated	9	0.866834	0.4203
T cell selection	GO	6 out of 8	23.6648	downregulated	2	1.34157	0.2614					downregulated	5	5.18084	0.0056	downregulated	3	8.4958	0.0002	upregulated	2	4.18041	0.0153	upregulated	4	4.18041	0.0153	downregulated	1	4.18041	0.0153	upregulated	3	4.4662	0.0115
regulation of striated muscle tissue development	GO	7 out of 8	23.6103	upregulated	11	6.91343	0.001	downregulated	2	0.628457	0.5334	downregulated	12	8.59801	0.0002	downregulated	5	1.67504	0.1873	upregulated	7	5.33079	0.0048	upregulated	17	5.51841	0.004	upregulated	17	4.11901	0.0163	upregulated	13	4.65401	0.0095
blood microparticle	GO	5 out of 8	23.5461	downregulated	3	0.853382	0.426	upregulated	2	0.0902197	0.9137	downregulated	9	7.2562	0.0007	downregulated	5	7.23862	0.0007	downregulated	1	0.125709	0.8819	upregulated	4	3.75229	0.0235	upregulated	5	4.66154	0.0095
negative regulation of mitotic cell cycle phase transition	GO	6 out of 8	23.4279	upregulated	7	1.3569	0.2575	upregulated	6	1.2668	0.2817	downregulated	23	12.7767	2.8e-06	downregulated	17	9.16475	0.0001	upregulated	3	0.358157	0.699	upregulated	14	1.15018	0.3166	upregulated	18	1.43013	0.2393	upregulated	15	1.17167	0.3098
positive regulation of nitric oxide metabolic process	GO	5 out of 8	23.3693	downregulated	1	2.67212	0.0691	upregulated	1	3.0119	0.0492	downregulated	6	9.08244	0.0001	downregulated	6	9.82914	5.4e-05					upregulated	1	0.347194	0.7067	upregulated	2	4.52582	0.0108	downregulated	1	0.07547	0.9273
stem cell population maintenance	GO	7 out of 8	23.1887	downregulated	5	1.34945	0.2594	upregulated	5	2.68242	0.0684	downregulated	12	2.4003	0.0907	downregulated	7	1.88426	0.1519	upregulated	8	6.94589	0.001	upregulated	17	4.87769	0.0076	upregulated	20	4.62414	0.0098	upregulated	17	3.78942	0.0226
regulation of response to wounding	GO	7 out of 8	23.0281	downregulated	6	1.66597	0.189	upregulated	9	4.83061	0.008	downregulated	16	8.88271	0.0001	downregulated	12	6.81691	0.0011	upregulated	3	2.08647	0.1241	upregulated	11	2.05226	0.1284	upregulated	13	5.00376	0.0067	upregulated	9	1.35062	0.2591
regulation of cysteine-type endopeptidase activity	GO	7 out of 8	22.8011	downregulated	8	2.25809	0.1045	upregulated	5	3.62011	0.0268	downregulated	22	8.98134	0.0001	downregulated	15	6.2255	0.002	upregulated	5	2.16259	0.115	upregulated	15	2.68203	0.0684	upregulated	23	2.44693	0.0866	upregulated	20	1.66476	0.1892
vasculature development	GO	4 out of 8	22.795	downregulated	17	2.65887	0.07	upregulated	16	2.719	0.0659	downregulated	49	14.7198	4e-07	downregulated	32	8.83812	0.0001	upregulated	18	5.9793	0.0025	upregulated	43	8.76907	0.0002	upregulated	47	4.0836	0.0168	upregulated	31	3.96305	0.019
regulation of development, heterochronic	GO	7 out of 8	22.7477	downregulated	1	1.35223	0.2587	upregulated	1	1.63685	0.1946	downregulated	2	4.19569	0.0151	downregulated	2	2.54566	0.0784	upregulated	2	5.36107	0.0047	upregulated	2	4.05933	0.0173	upregulated	3	2.50281	0.0819	upregulated	2	4.36775	0.0127
steroid metabolic process	GO	3 out of 8	22.6886	upregulated	5	0.129132	0.8789	upregulated	10	3.94359	0.0194	downregulated	19	9.47326	7.7e-05	downregulated	22	16.7107	5.5e-08	downregulated	3	0.300434	0.7405	upregulated	4	1.03766	0.3543	downregulated	6	0.142234	0.8674	downregulated	5	0.0176588	0.9825
tissue regeneration	GO	7 out of 8	22.6428	downregulated	1	0.390984	0.6764	upregulated	1	0.329439	0.7193	downregulated	5	3.89697	0.0203	downregulated	2	3.6714	0.0254	upregulated	3	3.90372	0.0202	upregulated	5	4.7239	0.0089	upregulated	4	4.1859	0.0152	upregulated	2	2.19935	0.1109
positive regulation of reactive oxygen species biosynthetic process	GO	6 out of 8	22.5985	downregulated	1	2.45967	0.0855	upregulated	1	2.82142	0.0595	downregulated	6	8.68797	0.0002	downregulated	6	8.87128	0.0001					upregulated	2	0.300548	0.7404	upregulated	5	4.28677	0.0137	upregulated	4	0.813671	0.4432
autophagosome organization	GO	6 out of 8	22.584	upregulated	2	0.519569	0.5948	upregulated	1	0.187551	0.829	downregulated	9	7.4196	0.0006	downregulated	4	1.62751	0.1964	upregulated	3	3.23669	0.0393	upregulated	5	3.98133	0.0187	upregulated	7	4.05748	0.0173	upregulated	6	2.96856	0.0514
neuron fate commitment	GO	7 out of 8	22.5169	downregulated	2	0.845595	0.4293	downregulated	1	3.53305	0.0292	downregulated	7	4.26404	0.0141	downregulated	2	1.53642	0.2152	upregulated	5	5.04491	0.0064	upregulated	8	6.50997	0.0015	downregulated	3	3.74068	0.0237	upregulated	6	4.52358	0.0109
maintenance of cell number	GO	7 out of 8	22.4905	downregulated	5	1.30008	0.2725	upregulated	5	2.61567	0.0731	downregulated	12	2.3811	0.0924	downregulated	7	1.86574	0.1548	upregulated	8	6.82142	0.0011	upregulated	17	4.75494	0.0086	upregulated	20	4.36702	0.0127	upregulated	17	3.61586	0.0269
midbrain development	GO	7 out of 8	22.4021	upregulated	2	0.970636	0.3788	downregulated	2	3.19151	0.0411	downregulated	9	4.7339	0.0088	downregulated	4	1.31143	0.2694	upregulated	2	0.708778	0.4922	upregulated	11	4.29687	0.0136	upregulated	14	4.51958	0.0109	upregulated	10	3.64003	0.0263
epidermal cell differentiation	GO	8 out of 8	22.3895	downregulated	5	1.71868	0.1793	downregulated	5	2.52194	0.0803	downregulated	12	3.73463	0.0239	downregulated	2	1.71735	0.1795	upregulated	3	3.10283	0.0449	upregulated	7	3.18342	0.0414	upregulated	11	3.56743	0.0282	upregulated	5	2.84324	0.0582
collagen-activated signaling pathway	GO	6 out of 8	22.387									downregulated	3	5.74429	0.0032	downregulated	2	6.45423	0.0016	upregulated	1	2.20248	0.1105	upregulated	3	3.60624	0.0272	upregulated	3	3.13065	0.0437	upregulated	1	1.24909	0.2868
posttranscriptional gene silencing	GO	7 out of 8	22.3708	downregulated	1	0.2464	0.7816	upregulated	2	1.3047	0.2713	downregulated	11	4.94745	0.0071	downregulated	7	5.08059	0.0062	upregulated	1	0.668475	0.5125	upregulated	10	5.07369	0.0063	upregulated	10	4.79174	0.0083	upregulated	9	2.86712	0.0569
14-3-3 protein binding	GO	7 out of 8	22.3417	downregulated	4	6.24775	0.0019					downregulated	1	1.00243	0.367	downregulated	2	2.3148	0.0988	upregulated	1	1.8629	0.1552	upregulated	3	4.01898	0.018	upregulated	3	3.17507	0.0418	upregulated	3	3.71977	0.0242
fatty acid biosynthetic process	GO	6 out of 8	22.3311	downregulated	6	6.69996	0.0012	upregulated	4	0.607512	0.5447	downregulated	10	5.30077	0.005	downregulated	7	8.06866	0.0003	upregulated	1	2.07949	0.125	upregulated	5	1.40994	0.2442	downregulated	8	1.5451	0.2133	upregulated	6	0.924913	0.3966
embryonic digit morphogenesis	GO	5 out of 8	22.234	upregulated	5	1.61912	0.1981	downregulated	1	2.90025	0.055	upregulated	2	0.839494	0.4319	upregulated	1	0.918966	0.3989	upregulated	3	4.09315	0.0167	upregulated	10	6.41155	0.0016	upregulated	10	7.89599	0.0004	upregulated	8	4.31062	0.0134
male sex differentiation	GO	7 out of 8	22.2213	downregulated	4	1.35368	0.2583	upregulated	7	6.23306	0.002	downregulated	10	5.11013	0.006	downregulated	9	2.39371	0.0913	upregulated	5	3.58307	0.0278	upregulated	14	6.07188	0.0023	upregulated	20	6.76988	0.0011	upregulated	11	3.17196	0.0419
regulation of signal transduction by p53 class mediator	GO	7 out of 8	22.2091	downregulated	2	3.276	0.0378	upregulated	6	4.56879	0.0104	downregulated	14	5.47716	0.0042	downregulated	8	4.20638	0.0149	upregulated	5	4.82883	0.008	upregulated	12	4.03374	0.0177	upregulated	17	3.03202	0.0482	upregulated	11	1.92373	0.1461
regulation of Notch signaling pathway	GO	7 out of 8	22.078	downregulated	5	2.47952	0.0838	upregulated	2	1.56235	0.2096	downregulated	9	2.06252	0.1271	downregulated	3	0.916945	0.3997	upregulated	5	4.37096	0.0126	upregulated	11	4.68757	0.0092	upregulated	9	3.13264	0.0436	upregulated	7	5.99018	0.0025
skeletal system development	GO	4 out of 8	22.007	downregulated	14	1.02855	0.3575	upregulated	13	2.58153	0.0757	downregulated	33	2.85216	0.0577	downregulated	19	7.45285	0.0006	upregulated	13	3.18042	0.0416	upregulated	46	8.60675	0.0002	upregulated	46	6.38815	0.0017	upregulated	34	3.83167	0.0217
negative regulation of neurogenesis	GO	4 out of 8	21.8181	downregulated	11	4.18434	0.0152	upregulated	8	4.65412	0.0095	downregulated	37	25.6023	7.6e-12	downregulated	24	8.63094	0.0002	upregulated	10	7.04748	0.0009	downregulated	23	7.19943	0.0007	downregulated	31	7.45654	0.0006	downregulated	21	4.33686	0.0131
negative regulation of cell adhesion	GO	6 out of 8	21.6188	upregulated	10	1.81926	0.1621	upregulated	10	0.967878	0.3799	downregulated	28	11.3657	1.2e-05	downregulated	12	4.54777	0.0106	upregulated	7	2.08661	0.1241	upregulated	20	1.52145	0.2184	upregulated	28	4.24141	0.0144	upregulated	21	0.643045	0.5257
embryonic pattern specification	GO	7 out of 8	21.6133	downregulated	4	2.42434	0.0885	downregulated	1	2.9808	0.0508	downregulated	4	4.00523	0.0182	upregulated	1	0.918966	0.3989	upregulated	2	1.82721	0.1609	upregulated	9	3.87316	0.0208	upregulated	9	3.80361	0.0223	upregulated	8	3.61789	0.0268
mesenchymal cell differentiation	GO	6 out of 8	21.5694	upregulated	9	3.14018	0.0433	upregulated	2	2.54587	0.0784	downregulated	16	11.1024	1.5e-05	downregulated	10	3.33488	0.0356	upregulated	5	4.27219	0.014	upregulated	17	4.07463	0.017	upregulated	18	3.16099	0.0424	upregulated	12	1.31038	0.2697
stem cell development	GO	6 out of 8	21.5674	upregulated	5	1.71834	0.1794	upregulated	3	3.64252	0.0262	downregulated	12	10.954	1.7e-05	downregulated	3	0.925866	0.3962	upregulated	4	4.85986	0.0078	upregulated	11	6.71133	0.0012	upregulated	7	2.22301	0.1083	upregulated	6	1.25425	0.2853
spindle localization	GO	6 out of 8	21.489	upregulated	1	2.07947	0.125	upregulated	1	0.392548	0.6753	downregulated	7	5.21325	0.0054	downregulated	4	3.49787	0.0303	upregulated	4	5.78117	0.0031	upregulated	7	3.07311	0.0463	upregulated	6	1.2751	0.2794	upregulated	4	3.04107	0.0478
amine catabolic process	GO	6 out of 8	21.4688	downregulated	2	2.68992	0.0679					upregulated	2	3.96294	0.019	downregulated	2	2.90446	0.0548	upregulated	1	2.58855	0.0751	upregulated	4	3.90139	0.0202	upregulated	5	5.38437	0.0046	upregulated	4	4.00015	0.0183
regulation of stem cell differentiation	GO	8 out of 8	21.3494	downregulated	5	2.34466	0.0959	downregulated	3	2.04949	0.1288	downregulated	8	1.83174	0.1601	downregulated	2	0.245497	0.7823	upregulated	5	4.0113	0.0181	upregulated	11	4.71352	0.009	upregulated	11	2.99125	0.0502	upregulated	11	3.16192	0.0423
extrinsic component of cytoplasmic side of plasma membrane	GO	6 out of 8	21.3039	upregulated	5	5.36068	0.0047	upregulated	1	1.59624	0.2027	downregulated	5	2.17389	0.1137	downregulated	9	4.83322	0.008	upregulated	4	4.53481	0.0107	upregulated	11	4.02697	0.0178	upregulated	14	6.85386	0.0011	upregulated	10	5.83803	0.0029
regulation of hematopoietic progenitor cell differentiation	GO	8 out of 8	21.156	downregulated	3	2.08203	0.1247	downregulated	1	4.42058	0.012	downregulated	5	3.32028	0.0361	downregulated	1	0.233857	0.7915	upregulated	1	2.32269	0.098	upregulated	3	3.3876	0.0338	upregulated	5	3.28163	0.0376	upregulated	5	2.10729	0.1216
microtubule organizing center localization	GO	7 out of 8	21.1348	downregulated	1	1.7564	0.1727	upregulated	2	1.84986	0.1573	downregulated	8	10.24	3.6e-05	downregulated	3	3.44291	0.032	upregulated	1	0.705737	0.4937	upregulated	6	4.89367	0.0075	upregulated	4	1.59523	0.2029	upregulated	1	0.350623	0.7042
extracellular structure organization	GO	7 out of 8	21.1344	downregulated	10	1.33889	0.2621	upregulated	10	1.65765	0.1906	downregulated	28	5.65973	0.0035	downregulated	18	9.22855	9.8e-05	upregulated	5	0.591793	0.5533	upregulated	23	2.74594	0.0642	upregulated	21	2.52442	0.0801	upregulated	9	0.70275	0.4952
neuron fate specification	GO	5 out of 8	21.1079									downregulated	3	2.25445	0.1049					upregulated	4	7.37281	0.0006	upregulated	4	4.72882	0.0088	upregulated	4	2.3092	0.0993	upregulated	3	4.44264	0.0118
fluid transport	GO	4 out of 8	21.1003	upregulated	1	0.320292	0.7259	upregulated	1	3.37797	0.0341									upregulated	2	6.64711	0.0013	upregulated	2	6.64711	0.0013	upregulated	2	5.54977	0.0039	upregulated	2	5.9546	0.0026
positive regulation of pri-miRNA transcription by RNA polymerase II	GO	7 out of 8	21.087	downregulated	2	2.16831	0.1144					downregulated	3	1.27468	0.2795	downregulated	1	1.18809	0.3048	upregulated	2	4.47941	0.0113	upregulated	4	5.35866	0.0047	upregulated	5	3.26682	0.0381	upregulated	4	3.351	0.035
positive T cell selection	GO	6 out of 8	21.0152	downregulated	2	1.87495	0.1534					downregulated	4	4.91185	0.0074	downregulated	2	4.83178	0.008	upregulated	1	4.55511	0.0105	upregulated	2	4.55511	0.0105	downregulated	1	4.55511	0.0105	upregulated	1	4.8415	0.0079
autophagy	GO	6 out of 8	21.0117	upregulated	9	1.0757	0.3411	upregulated	13	1.93737	0.1441	downregulated	22	6.56776	0.0014	downregulated	10	2.49392	0.0826	upregulated	5	2.29381	0.1009	upregulated	19	4.41868	0.0121	upregulated	29	4.76217	0.0085	upregulated	22	3.48843	0.0305
macroautophagy	GO	6 out of 8	21.0095	upregulated	4	0.372246	0.6892	upregulated	8	1.51717	0.2193	downregulated	12	3.34046	0.0354	downregulated	6	1.53252	0.216	upregulated	5	3.43147	0.0323	upregulated	15	5.13914	0.0059	upregulated	19	4.37333	0.0126	upregulated	18	5.08196	0.0062
branching morphogenesis of an epithelial tube	GO	6 out of 8	20.9353	downregulated	8	3.23695	0.0393	upregulated	2	1.02432	0.359	downregulated	11	4.71845	0.0089	upregulated	1	0.778667	0.459	upregulated	5	4.02412	0.0179	upregulated	14	4.55208	0.0105	upregulated	17	3.84758	0.0213	upregulated	8	2.35915	0.0945
diencephalon development	GO	6 out of 8	20.9038	downregulated	1	1.21905	0.2955	upregulated	1	0.687228	0.503	downregulated	4	3.6127	0.027	upregulated	1	0.785661	0.4558	upregulated	5	4.08903	0.0168	upregulated	9	5.23777	0.0053	upregulated	9	4.00408	0.0182	upregulated	8	4.21405	0.0148
ciliary plasm	GO	6 out of 8	20.8212	upregulated	8	2.95357	0.0522	downregulated	1	0.102603	0.9025	downregulated	1	1.47992	0.2277	upregulated	2	1.57705	0.2066	upregulated	3	2.40027	0.0907	upregulated	17	5.35414	0.0047	upregulated	26	12.8516	2.6e-06	upregulated	13	3.16329	0.0423
reactive oxygen species biosynthetic process	GO	6 out of 8	20.7915									downregulated	2	1.59674	0.2026	downregulated	2	3.35094	0.0351	upregulated	1	3.76664	0.0231	upregulated	2	4.14251	0.0159	upregulated	2	3.43468	0.0322	upregulated	2	4.49999	0.0111
vasculogenesis	GO	4 out of 8	20.6998	downregulated	3	3.02598	0.0485	upregulated	2	2.12287	0.1197	downregulated	6	3.58953	0.0276	downregulated	3	2.24612	0.1058	upregulated	3	6.39345	0.0017	upregulated	4	6.39345	0.0017	upregulated	3	4.09544	0.0166	upregulated	3	3.81744	0.022
embryonic organ development	GO	8 out of 8	20.6983	downregulated	14	2.90766	0.0546	downregulated	6	2.3517	0.0952	downregulated	27	3.36347	0.0346	downregulated	16	1.3741	0.2531	upregulated	11	4.16868	0.0155	upregulated	31	3.86593	0.0209	upregulated	38	1.37801	0.2521	upregulated	25	1.28877	0.2756
cytokinesis	GO	4 out of 8	20.5647	upregulated	5	1.34089	0.2616	upregulated	3	2.32194	0.0981	downregulated	8	4.18592	0.0152	downregulated	5	1.46242	0.2317	upregulated	6	6.53518	0.0015	upregulated	14	5.51267	0.004	upregulated	12	4.37063	0.0126	upregulated	10	4.14625	0.0158
negative regulation of leukocyte cell-cell adhesion	GO	7 out of 8	20.538	downregulated	2	0.23503	0.7905	upregulated	3	0.776751	0.4599	downregulated	10	5.66443	0.0035	downregulated	5	7.48314	0.0006	upregulated	3	1.09562	0.3343	upregulated	9	2.58534	0.0754	upregulated	13	2.80232	0.0607	upregulated	8	1.44891	0.2348
retina development in camera-type eye	GO	6 out of 8	20.4505	upregulated	10	5.4455	0.0043	upregulated	5	2.35291	0.0951	downregulated	9	2.778	0.0622	downregulated	6	1.30888	0.2701	upregulated	7	9.68871	6.2e-05	upregulated	11	6.27846	0.0019	upregulated	14	2.96273	0.0517	upregulated	7	5.23215	0.0053
eye morphogenesis	GO	5 out of 8	20.4501	upregulated	9	7.2154	0.0007	upregulated	3	1.49502	0.2242	downregulated	13	5.22145	0.0054	upregulated	1	1.07474	0.3414	upregulated	8	10.801	2e-05	upregulated	14	6.7449	0.0012	upregulated	16	3.89489	0.0203	upregulated	9	3.57307	0.0281
RNA polymerase II core promoter sequence-specific DNA binding	GO	5 out of 8	20.3264					upregulated	1	0.838384	0.4324	downregulated	1	1.64113	0.1938	downregulated	3	3.52794	0.0294	upregulated	3	5.21745	0.0054	upregulated	5	5.35621	0.0047	upregulated	4	3.00557	0.0495	upregulated	4	4.05759	0.0173
negative regulation of protein localization to nucleus	GO	7 out of 8	20.3204	downregulated	2	1.61722	0.1985	downregulated	1	4.74815	0.0087	downregulated	2	1.1678	0.3111	downregulated	2	2.55189	0.0779	downregulated	2	2.64199	0.0712	upregulated	3	4.64101	0.0096	upregulated	6	5.20061	0.0055	upregulated	5	3.0357	0.048
asymmetric cell division	GO	6 out of 8	20.2825	upregulated	1	0.593916	0.5522	downregulated	1	4.38326	0.0125	downregulated	1	1.11692	0.3273	downregulated	2	2.13526	0.1182					upregulated	4	3.36987	0.0344	upregulated	4	4.13502	0.016	upregulated	5	5.7361	0.0032
secondary palate development	GO	6 out of 8	20.2185	downregulated	2	2.21841	0.1088					downregulated	3	3.08895	0.0455					upregulated	2	4.54017	0.0107	upregulated	6	4.79611	0.0083	upregulated	5	2.62785	0.0722	upregulated	3	2.94703	0.0525
regulation of non-canonical Wnt signaling pathway	GO	6 out of 8	20.1844	downregulated	1	3.04712	0.0475					downregulated	2	1.72781	0.1777					upregulated	2	2.55645	0.0776	upregulated	4	4.51868	0.0109	upregulated	4	4.50091	0.0111	upregulated	4	3.83344	0.0216
cranial skeletal system development	GO	6 out of 8	20.0939	upregulated	1	2.36028	0.0944					downregulated	9	4.32124	0.0133	downregulated	3	1.0805	0.3394	upregulated	4	2.60789	0.0737	upregulated	10	5.41729	0.0044	upregulated	13	5.75342	0.0032	upregulated	9	3.27389	0.0379
response to dsRNA	GO	7 out of 8	19.9759	downregulated	2	0.980748	0.375	upregulated	6	4.28668	0.0138	downregulated	11	4.18424	0.0152	downregulated	10	10.0124	4.5e-05	upregulated	1	1.68927	0.1847	upregulated	8	3.23967	0.0392	upregulated	8	2.41696	0.0892	upregulated	5	1.73931	0.1756
positive regulation of extracellular matrix organization	GO	6 out of 8	19.7655					upregulated	1	0.636653	0.5291	downregulated	4	5.41614	0.0044	downregulated	1	0.837446	0.4328	upregulated	2	4.12769	0.0161	upregulated	2	4.84629	0.0079	upregulated	4	3.57017	0.0282	upregulated	3	1.60442	0.201
negative regulation of cysteine-type endopeptidase activity	GO	7 out of 8	19.7241	downregulated	3	2.38331	0.0922	upregulated	2	0.266325	0.7662	downregulated	8	2.71809	0.066	downregulated	8	6.91797	0.001	upregulated	2	1.59214	0.2035	upregulated	7	2.56002	0.0773	upregulated	7	1.50354	0.2223	upregulated	7	2.31532	0.0987
mesoderm development	GO	8 out of 8	19.7011	downregulated	7	4.26138	0.0141	downregulated	2	0.56435	0.5687	downregulated	8	3.31334	0.0364	downregulated	5	4.15593	0.0157	upregulated	1	1.51631	0.2195	upregulated	8	2.53486	0.0793	upregulated	11	2.03673	0.1305	upregulated	7	1.31825	0.2676
vascular endothelial growth factor signaling pathway	GO	7 out of 8	19.5232	downregulated	3	7.75091	0.0004	downregulated	2	2.28817	0.1015	downregulated	1	2.81314	0.06	downregulated	1	1.38864	0.2494	upregulated	1	3.02467	0.0486	upregulated	1	2.33161	0.0971	upregulated	2	2.03868	0.1302	downregulated	2	2.11263	0.1209
regulation of small GTPase mediated signal transduction	GO	5 out of 8	19.518	upregulated	23	5.74718	0.0032	downregulated	9	4.33137	0.0131	downregulated	41	9.98093	4.6e-05	downregulated	24	7.73186	0.0004	upregulated	12	7.37778	0.0006	downregulated	26	5.60764	0.0037	downregulated	29	5.26811	0.0052	upregulated	21	6.71897	0.0012
regulation of mitochondrial depolarization	GO	6 out of 8	19.4683	downregulated	2	2.60906	0.0736	upregulated	1	1.90524	0.1488	downregulated	4	6.2831	0.0019	downregulated	1	2.12549	0.1194	upregulated	2	6.68615	0.0012	upregulated	2	3.28587	0.0374	upregulated	1	0.383876	0.6812
long-chain fatty acid binding	GO	3 out of 8	19.3483					downregulated	1	2.82665	0.0592	downregulated	3	12.4692	3.8e-06	downregulated	1	5.24738	0.0053													downregulated	1	1.19494	0.3027
humoral immune response	GO	4 out of 8	19.3482	upregulated	1	1.64192	0.1936	upregulated	1	1.42002	0.2417	downregulated	16	8.23778	0.0003	downregulated	14	12.6524	3.2e-06					upregulated	3	0.244388	0.7832	upregulated	4	1.29162	0.2748	downregulated	4	0.015984	0.9841
nuclear transcription factor complex	GO	6 out of 8	19.3116	downregulated	10	4.66615	0.0094	upregulated	7	1.50106	0.2229	downregulated	17	2.21675	0.109	upregulated	2	2.68584	0.0682	upregulated	8	5.57241	0.0038	upregulated	23	5.10472	0.0061	upregulated	28	3.93789	0.0195	upregulated	17	2.00056	0.1353
regulation of sprouting angiogenesis	GO	7 out of 8	19.2204	downregulated	5	6.65067	0.0013	upregulated	1	0.0908984	0.9131	downregulated	6	3.59397	0.0275	downregulated	3	2.4924	0.0827	upregulated	2	2.23855	0.1066	upregulated	7	2.12417	0.1195	upregulated	6	1.16818	0.3109	upregulated	5	1.04334	0.3523
protein K11-linked deubiquitination	GO	7 out of 8	19.1298	downregulated	1	2.73308	0.065	upregulated	1	1.09176	0.3356	downregulated	1	2.00483	0.1347	downregulated	1	2.22031	0.1086	upregulated	1	2.15285	0.1162	upregulated	2	3.24814	0.0388	upregulated	2	3.40515	0.0332	upregulated	3	4.45719	0.0116
nucleobase-containing compound transport	GO	6 out of 8	19.046	downregulated	5	0.785079	0.4561	upregulated	10	2.73408	0.065	downregulated	23	7.31959	0.0007	downregulated	18	9.13209	0.0001	upregulated	3	2.93068	0.0534	upregulated	11	0.990498	0.3714	downregulated	10	0.770592	0.4627	upregulated	19	1.3927	0.2484
regulation of inflammatory response	GO	6 out of 8	19.0184	upregulated	6	1.25524	0.285	upregulated	13	4.41765	0.0121	downregulated	21	4.64552	0.0096	downregulated	24	13.8033	1e-06	upregulated	5	1.33795	0.2624	upregulated	16	1.6715	0.188	upregulated	18	1.98005	0.1381	upregulated	16	1.25302	0.2856
superoxide metabolic process	GO	7 out of 8	18.9559	downregulated	1	0.786226	0.4556	downregulated	1	1.46283	0.2316	downregulated	6	6.14159	0.0022	downregulated	5	7.2117	0.0007	upregulated	1	1.96466	0.1402	upregulated	3	1.1088	0.33	upregulated	2	0.280115	0.7557
gene silencing	GO	7 out of 8	18.8356	downregulated	1	0.0388932	0.9619	upregulated	6	1.37267	0.2534	downregulated	17	3.29058	0.0372	downregulated	12	5.07531	0.0062	upregulated	3	0.484261	0.6162	upregulated	17	3.85214	0.0212	upregulated	18	4.16613	0.0155	upregulated	16	3.30099	0.0368
negative T cell selection	GO	6 out of 8	18.8303	upregulated	1	1.20047	0.3011					downregulated	2	7.06749	0.0009	downregulated	2	6.63436	0.0013	upregulated	1	2.33031	0.0973	upregulated	1	1.38689	0.2499	upregulated	1	0.876552	0.4162	upregulated	1	1.73516	0.1764
embryonic heart tube development	GO	7 out of 8	18.6751	upregulated	8	6.37707	0.0017	downregulated	3	5.79742	0.003	downregulated	4	2.86227	0.0571	downregulated	3	2.01387	0.1335	upregulated	4	4.06069	0.0172	upregulated	6	4.93425	0.0072	upregulated	7	2.74974	0.0639	upregulated	4	2.63396	0.0718
response to hepatocyte growth factor	GO	7 out of 8	18.6709	downregulated	1	2.28877	0.1014	upregulated	1	2.15853	0.1155	downregulated	4	5.69823	0.0034	downregulated	1	1.50711	0.2215	upregulated	1	3.19271	0.0411	upregulated	2	3.0716	0.0463	upregulated	3	3.56767	0.0282	upregulated	2	1.50332	0.2224
regulation of protein localization to nucleus	GO	8 out of 8	18.5594	downregulated	4	1.66018	0.1901	downregulated	1	3.57653	0.028	downregulated	6	1.13581	0.3212	downregulated	5	1.21787	0.2959	upregulated	4	2.31058	0.0992	upregulated	10	2.80041	0.0608	upregulated	13	3.60061	0.0273	upregulated	10	2.25742	0.1046
glial cell projection	GO	6 out of 8	18.556					downregulated	1	1.06991	0.343	downregulated	2	3.53428	0.0292	downregulated	3	4.82913	0.008					upregulated	1	3.80233	0.0223	upregulated	1	3.0747	0.0462	upregulated	1	2.24569	0.1059
regulation of stem cell population maintenance	GO	7 out of 8	18.5519	upregulated	2	0.855262	0.4252	downregulated	2	1.96189	0.1406	downregulated	4	1.20552	0.2995	downregulated	3	2.14127	0.1175	upregulated	2	2.71986	0.0659	upregulated	5	5.22071	0.0054	upregulated	4	3.441	0.032	upregulated	5	2.71694	0.0661
gastrulation	GO	7 out of 8	18.3978	downregulated	4	3.02487	0.0486	upregulated	1	0.0729285	0.9297	downregulated	10	5.24873	0.0053	downregulated	6	5.19815	0.0055	upregulated	3	0.695022	0.4991	upregulated	15	2.14789	0.1167	upregulated	15	0.962816	0.3818	upregulated	11	1.1933	0.3032
transcriptional activator activity, RNA polymerase II transcription factor binding	GO	7 out of 8	18.3545	downregulated	2	2.2978	0.1005					downregulated	2	4.21778	0.0147	downregulated	2	3.67306	0.0254	upregulated	1	1.16623	0.3115	upregulated	2	1.82269	0.1616	upregulated	3	3.70385	0.0246	upregulated	3	1.47309	0.2292
anterior/posterior pattern specification	GO	7 out of 8	18.3303	upregulated	10	1.94932	0.1424	downregulated	3	1.82181	0.1617	downregulated	14	1.77839	0.1689	downregulated	6	1.02223	0.3598	upregulated	6	3.7727	0.023	upregulated	19	5.94294	0.0026	upregulated	19	2.22431	0.1081	upregulated	14	1.76789	0.1707
ketone body metabolic process	GO	3 out of 8	18.3269																					upregulated	2	4.53703	0.0107	upregulated	2	4.77292	0.0085	upregulated	2	9.01693	0.0001
hair follicle morphogenesis	GO	7 out of 8	18.2966	downregulated	2	1.94448	0.1431	downregulated	1	4.31148	0.0134	downregulated	3	2.22348	0.1082					upregulated	1	1.92202	0.1463	upregulated	3	3.21649	0.0401	upregulated	4	3.00492	0.0495	upregulated	3	1.6737	0.1876
positive regulation of muscle tissue development	GO	7 out of 8	18.296	upregulated	5	3.67547	0.0253	downregulated	1	0.742934	0.4757	downregulated	6	5.4043	0.0045	downregulated	2	0.98662	0.3728	upregulated	5	5.73706	0.0032	upregulated	8	3.44436	0.0319	upregulated	7	3.53544	0.0291	upregulated	6	2.12071	0.1199
transcription factor activity, RNA polymerase II transcription factor binding	GO	7 out of 8	18.289	downregulated	2	0.77087	0.4626	upregulated	2	2.6641	0.0697	downregulated	2	3.16368	0.0423	downregulated	5	3.57732	0.028	upregulated	2	2.18825	0.1121	upregulated	7	4.88276	0.0076	upregulated	7	4.21537	0.0148	upregulated	6	2.15483	0.1159
Lys48-specific deubiquitinase activity	GO	7 out of 8	18.2881	downregulated	1	2.10946	0.1213	downregulated	1	1.3412	0.2615	upregulated	1	1.35964	0.2568	downregulated	1	1.87746	0.153	upregulated	2	3.42064	0.0327	upregulated	3	4.61133	0.0099	upregulated	3	3.83924	0.0215	upregulated	3	2.44841	0.0864
cell division	GO	6 out of 8	18.2761	upregulated	32	3.34462	0.0353	upregulated	36	13.4795	1.4e-06	downregulated	54	12.5853	3.4e-06	downregulated	26	3.62799	0.0266	upregulated	16	4.50178	0.0111	upregulated	50	4.18623	0.0152	upregulated	59	5.91211	0.0027	upregulated	50	4.2868	0.0137
positive regulation of reactive oxygen species metabolic process	GO	5 out of 8	18.2634	downregulated	1	1.87482	0.1534	upregulated	2	2.18973	0.1119	downregulated	9	7.3688	0.0006	downregulated	8	6.91797	0.001	downregulated	1	0.247428	0.7808	downregulated	1	0.200855	0.818	upregulated	7	3.64858	0.026	upregulated	6	1.09123	0.3358
heterotrimeric G-protein complex	GO	4 out of 8	18.2391	upregulated	3	5.00813	0.0067	downregulated	1	1.11978	0.3264	upregulated	2	1.238	0.29	downregulated	1	0.339369	0.7122	upregulated	2	3.31575	0.0363	upregulated	6	4.93903	0.0072	upregulated	5	5.30757	0.005	upregulated	4	4.67675	0.0093
positive regulation of vascular endothelial cell proliferation	GO	6 out of 8	18.2015	downregulated	1	1.0435	0.3522	downregulated	1	1.86215	0.1553	downregulated	2	2.22702	0.1078					downregulated	2	1.97649	0.1386	upregulated	3	3.09913	0.0451	upregulated	5	8.13174	0.0003	upregulated	4	3.81441	0.0221
female pregnancy	GO	7 out of 8	18.1031	downregulated	8	4.34874	0.0129	downregulated	3	0.92877	0.395	downregulated	12	5.67511	0.0034	downregulated	8	4.68345	0.0092	downregulated	1	0.0420232	0.9588	upregulated	7	0.382028	0.6825	upregulated	12	2.10912	0.1213	upregulated	7	0.0178647	0.9823
oxidoreductase activity, oxidizing metal ions	GO	5 out of 8	18.0452	upregulated	1	1.42298	0.241					downregulated	1	1.00718	0.3652	upregulated	1	2.68796	0.068	upregulated	1	1.87222	0.1538	upregulated	2	7.44397	0.0006	upregulated	2	7.91711	0.0004	upregulated	1	3.91565	0.0199
negative regulation of G1/S transition of mitotic cell cycle	GO	7 out of 8	18.0337	downregulated	2	0.302801	0.7387	upregulated	4	2.44609	0.0866	downregulated	16	10.8128	2e-05	downregulated	10	5.82968	0.0029	upregulated	2	0.416305	0.6595	upregulated	10	0.949892	0.3868	upregulated	13	1.02823	0.3576	upregulated	10	1.14016	0.3198
endopeptidase inhibitor activity	GO	4 out of 8	17.9916	downregulated	5	2.58538	0.0754	upregulated	4	2.42099	0.0888	upregulated	3	1.21764	0.2959	upregulated	2	2.30024	0.1002	upregulated	3	1.87517	0.1533	upregulated	7	3.68519	0.0251	upregulated	10	3.73019	0.024	upregulated	7	8.70104	0.0002
tube formation	GO	7 out of 8	17.9305	downregulated	5	4.49052	0.0112	upregulated	5	2.48037	0.0837	downregulated	12	6.08384	0.0023	downregulated	5	0.564864	0.5684	upregulated	4	3.16501	0.0422	upregulated	15	3.19505	0.041	upregulated	17	1.98962	0.1367	upregulated	8	0.921924	0.3978
positive regulation of double-strand break repair	GO	6 out of 8	17.9261	upregulated	1	1.35966	0.2567	upregulated	1	0.69954	0.4968	downregulated	3	1.85525	0.1564	downregulated	3	3.9578	0.0191	upregulated	2	3.34241	0.0354	upregulated	3	3.53707	0.0291	upregulated	5	6.29534	0.0018	upregulated	2	0.997451	0.3688
development of primary male sexual characteristics	GO	7 out of 8	17.8551	downregulated	3	1.50323	0.2224	upregulated	6	6.69028	0.0012	downregulated	10	5.58557	0.0038	downregulated	9	3.11533	0.0444	upregulated	4	3.57398	0.028	upregulated	12	4.1267	0.0161	upregulated	18	5.28155	0.0051	upregulated	9	1.35904	0.2569
mitotic DNA damage checkpoint	GO	6 out of 8	17.8062	upregulated	5	0.356425	0.7002	upregulated	6	2.63809	0.0715	downregulated	14	10.0344	4.4e-05	downregulated	10	5.66885	0.0035	upregulated	3	0.991357	0.3711	upregulated	10	1.06782	0.3438	upregulated	13	1.90647	0.1486	upregulated	9	1.1318	0.3225
nuclear matrix	GO	6 out of 8	17.7545	upregulated	9	1.91591	0.1472	upregulated	5	0.704047	0.4946	downregulated	11	1.60731	0.2004	downregulated	9	6.61785	0.0013	upregulated	2	0.867143	0.4202	upregulated	12	4.32041	0.0133	upregulated	17	5.74467	0.0032	upregulated	11	1.21705	0.2961
perinuclear endoplasmic reticulum	GO	6 out of 8	17.7543	downregulated	1	1.42045	0.2416	upregulated	1	0.781329	0.4578	downregulated	3	2.27993	0.1023	downregulated	4	5.82809	0.0029					upregulated	2	2.37389	0.0931	upregulated	2	3.3489	0.0351	upregulated	2	3.28442	0.0375
organic acid transmembrane transporter activity	GO	4 out of 8	17.722	upregulated	8	3.15689	0.0426	upregulated	2	2.18192	0.1128	upregulated	4	5.3086	0.0049	downregulated	6	4.14693	0.0158	upregulated	4	5.02335	0.0066	upregulated	8	4.82638	0.008	upregulated	10	3.04584	0.0476	upregulated	9	4.82638	0.008
transcription cofactor binding	GO	6 out of 8	17.7187	upregulated	2	0.352693	0.7028	upregulated	3	0.98494	0.3735	downregulated	3	3.27611	0.0378	downregulated	2	2.73997	0.0646	upregulated	4	3.46948	0.0311	upregulated	6	3.6654	0.0256	upregulated	6	3.08307	0.0458	upregulated	7	2.82227	0.0595
regionalization	GO	4 out of 8	17.688	upregulated	17	2.28152	0.1021	downregulated	4	1.42238	0.2411	downregulated	21	6.1567	0.0021	downregulated	10	1.68387	0.1857	upregulated	8	3.63052	0.0265	upregulated	27	6.151	0.0021	upregulated	30	3.69697	0.0248	upregulated	20	4.20951	0.0149
sterol metabolic process	GO	3 out of 8	17.6811	upregulated	3	0.395539	0.6733	upregulated	7	3.60152	0.0273	downregulated	10	7.88972	0.0004	downregulated	13	14.0625	7.8e-07	downregulated	3	1.17652	0.3084	upregulated	3	1.60152	0.2016	downregulated	5	0.621209	0.5373	downregulated	4	0.0778776	0.9251
AP-type membrane coat adaptor complex	GO	8 out of 8	17.5157	downregulated	3	3.14064	0.0433	downregulated	2	1.76294	0.1715	downregulated	5	2.94464	0.0526	downregulated	1	0.208747	0.8116	upregulated	2	3.10606	0.0448	upregulated	8	1.97304	0.139	upregulated	9	1.729	0.1775	upregulated	6	2.65064	0.0706
mRNA transport	GO	7 out of 8	17.5114	downregulated	3	0.600833	0.5484	upregulated	7	1.83346	0.1599	downregulated	17	6.14146	0.0022	downregulated	14	8.99645	0.0001	upregulated	2	2.05856	0.1276	upregulated	6	0.74858	0.473	upregulated	13	0.395433	0.6734	upregulated	11	0.403535	0.668
NADPH oxidase complex	GO	2 out of 8	17.5075									downregulated	4	8.70885	0.0002	downregulated	3	9.39875	8.3e-05									downregulated	1	0.600062	0.5488
purinergic nucleotide receptor signaling pathway	GO	7 out of 8	17.5005	downregulated	1	4.92206	0.0073	upregulated	2	9.58348	6.9e-05	downregulated	2	3.01104	0.0492	downregulated	3	7.7877	0.0004	upregulated	1	3.19702	0.0409	upregulated	2	4.71694	0.0089	upregulated	1	1.74483	0.1747	upregulated	1	1.70442	0.1819
cerebellar cortex morphogenesis	GO	6 out of 8	17.455					upregulated	1	0.847814	0.4284	downregulated	3	2.33949	0.0964	downregulated	1	0.805845	0.4467	upregulated	2	3.41377	0.0329	upregulated	4	4.34166	0.013	upregulated	5	3.22024	0.0399	upregulated	3	4.18175	0.0153
negative regulation of cell cycle G1/S phase transition	GO	7 out of 8	17.4277	downregulated	2	0.290247	0.7481	upregulated	4	2.39409	0.0913	downregulated	16	10.5251	2.7e-05	downregulated	10	5.69675	0.0034	upregulated	2	0.400009	0.6703	upregulated	10	0.882757	0.4136	upregulated	13	0.95789	0.3837	upregulated	10	1.06897	0.3434
cerebellum morphogenesis	GO	6 out of 8	17.3852					upregulated	1	0.700765	0.4962	downregulated	4	2.65211	0.0705	downregulated	1	0.698636	0.4973	upregulated	2	3.12978	0.0437	upregulated	5	4.1863	0.0152	upregulated	6	3.53184	0.0293	upregulated	5	3.88735	0.0205
cell fate specification	GO	4 out of 8	17.2861	downregulated	3	1.45418	0.2336					downregulated	7	5.25537	0.0052	downregulated	2	1.20615	0.2993	upregulated	6	6.86474	0.001	upregulated	6	3.97432	0.0188	upregulated	6	1.81199	0.1633	upregulated	5	4.63505	0.0097
cerebellar Purkinje cell layer morphogenesis	GO	5 out of 8	17.2023									downregulated	3	4.23495	0.0145					upregulated	2	4.75371	0.0086	upregulated	2	3.6033	0.0272	upregulated	2	1.85036	0.1572	upregulated	1	2.76	0.0633
ficolin-1-rich granule lumen	GO	6 out of 8	17.1944	downregulated	1	1.59193	0.2035	upregulated	4	1.13804	0.3204	downregulated	10	4.91469	0.0073	downregulated	9	7.12309	0.0008	upregulated	3	2.91187	0.0544	downregulated	6	0.480036	0.6188	upregulated	7	0.708054	0.4926	upregulated	4	0.424763	0.6539
collagen-activated tyrosine kinase receptor signaling pathway	GO	6 out of 8	17.134									downregulated	2	3.62197	0.0267	downregulated	1	3.86049	0.0211	upregulated	1	2.37526	0.093	upregulated	2	2.73138	0.0651	upregulated	2	3.15137	0.0428	upregulated	1	1.39352	0.2482
basic amino acid transmembrane transport	GO	4 out of 8	17.1217																	upregulated	1	4.40145	0.0123	upregulated	2	4.77906	0.0084	upregulated	2	3.63919	0.0263	upregulated	2	4.30199	0.0135
defense response to virus	GO	7 out of 8	17.0879	downregulated	6	1.78871	0.1672	upregulated	14	12.1602	5.2e-06	downregulated	14	4.09093	0.0167	downregulated	10	6.20098	0.002	upregulated	3	0.743471	0.4755	upregulated	16	5.02745	0.0066	upregulated	17	5.21781	0.0054	upregulated	6	6.1788	0.0021
negative regulation of secretion	GO	6 out of 8	17.0614	upregulated	7	0.732296	0.4808	upregulated	6	9.12706	0.0001	downregulated	14	4.1665	0.0155	downregulated	11	4.39237	0.0124	upregulated	4	3.25275	0.0387	upregulated	10	5.10354	0.0061	upregulated	11	6.92073	0.001	upregulated	6	3.08486	0.0457
clathrin-coated pit	GO	4 out of 8	17.0158	downregulated	3	2.17161	0.114	downregulated	3	1.57871	0.2062	downregulated	8	8.02582	0.0003	downregulated	7	4.66906	0.0094	upregulated	5	5.9185	0.0027	upregulated	12	4.28007	0.0138	upregulated	10	2.21089	0.1096	upregulated	9	4.60635	0.01
negative regulation of ATP biosynthetic process	GO	7 out of 8	16.9696	downregulated	1	1.2918	0.2748	downregulated	1	5.68899	0.0034	downregulated	1	0.771439	0.4623					upregulated	1	1.53106	0.2163	upregulated	3	3.78572	0.0227	upregulated	3	2.72121	0.0658	upregulated	1	1.1794	0.3075
autophagosome maturation	GO	6 out of 8	16.9325	upregulated	2	1.68511	0.1854	upregulated	2	1.67008	0.1882	downregulated	2	3.14007	0.0433	downregulated	2	3.00353	0.0496	upregulated	1	4.08315	0.0169	upregulated	3	3.39835	0.0334	upregulated	5	2.57945	0.0758	upregulated	5	4.08315	0.0169
ovulation cycle process	GO	5 out of 8	16.8688	upregulated	2	1.99747	0.1357					upregulated	1	1.75153	0.1735	downregulated	1	0.663934	0.5148	upregulated	3	5.05315	0.0064	upregulated	3	5.28307	0.0051	upregulated	6	2.8717	0.0566	upregulated	4	6.74599	0.0012
mitotic spindle pole	GO	7 out of 8	16.8181	downregulated	2	3.75641	0.0234	upregulated	2	1.49323	0.2246	downregulated	4	1.75824	0.1723	downregulated	4	3.61743	0.0269	upregulated	2	2.28096	0.1022	upregulated	3	1.73701	0.176	upregulated	4	2.61804	0.0729	upregulated	4	2.54326	0.0786
RNA polymerase II repressing transcription factor binding	GO	6 out of 8	16.7858	upregulated	2	1.4258	0.2403	downregulated	1	1.83556	0.1595	downregulated	3	2.64385	0.0711	downregulated	1	0.835979	0.4334	downregulated	2	2.32911	0.0974	upregulated	7	5.93397	0.0026	upregulated	8	6.13746	0.0022	upregulated	7	3.15391	0.0427
Fc-epsilon receptor signaling pathway	GO	3 out of 8	16.7081	upregulated	5	1.35481	0.258	upregulated	1	0.177789	0.8371	downregulated	12	7.70462	0.0005	downregulated	12	11.7208	8.1e-06	downregulated	2	0.315284	0.7296	downregulated	4	1.1224	0.3255	downregulated	3	0.876762	0.4161	upregulated	5	1.12975	0.3231
establishment of RNA localization	GO	5 out of 8	16.6632	downregulated	3	0.370595	0.6903	upregulated	9	2.25228	0.1052	downregulated	20	7.38178	0.0006	downregulated	16	10.0458	4.3e-05	upregulated	2	1.77942	0.1687	downregulated	12	1.08685	0.3373	downregulated	9	0.746669	0.4739	upregulated	16	1.17141	0.3099
peptidase inhibitor activity	GO	5 out of 8	16.6505	downregulated	5	2.50145	0.082	upregulated	4	2.39254	0.0914	upregulated	3	1.17768	0.308	upregulated	2	2.25722	0.1046	upregulated	3	1.80195	0.165	upregulated	7	3.63627	0.0264	upregulated	10	3.68116	0.0252	upregulated	7	8.59994	0.0002
dynein complex	GO	4 out of 8	16.635	upregulated	2	1.27746	0.2787	upregulated	2	1.73608	0.1762	downregulated	4	2.16801	0.1144	upregulated	1	2.27185	0.1031					upregulated	6	5.90239	0.0027	upregulated	11	8.61181	0.0002	upregulated	6	5.23823	0.0053
erythrocyte development	GO	7 out of 8	16.6038	downregulated	1	2.90682	0.0546					downregulated	3	2.80585	0.0605	downregulated	2	3.13002	0.0437	upregulated	1	0.905399	0.4044	upregulated	2	1.7046	0.1818	upregulated	5	3.52873	0.0293	upregulated	3	1.62242	0.1974
positive regulation of cellular component movement	GO	4 out of 8	16.5237	downregulated	14	5.18043	0.0056	upregulated	16	5.48183	0.0042	downregulated	47	14.9477	3.2e-07	downregulated	27	8.12187	0.0003	downregulated	18	2.93116	0.0533	downregulated	29	4.30646	0.0135	upregulated	47	4.16128	0.0156	downregulated	29	3.16821	0.0421
regulation of complement activation	GO	5 out of 8	16.5211	downregulated	2	1.44843	0.2349					downregulated	4	2.62622	0.0724	downregulated	4	9.96954	4.7e-05	downregulated	1	0.138344	0.8708	upregulated	1	0.934171	0.3929	upregulated	1	2.30664	0.0996	downregulated	2	0.625524	0.535
Fc-gamma receptor signaling pathway	GO	5 out of 8	16.5162	downregulated	6	3.80681	0.0222	downregulated	1	2.90431	0.0548	downregulated	10	5.18432	0.0056	downregulated	8	4.78629	0.0083	upregulated	1	2.10389	0.122	downregulated	5	1.35103	0.259	downregulated	5	0.918406	0.3992	upregulated	2	0.990755	0.3713
regulation of bone development	GO	8 out of 8	16.4257	downregulated	1	1.0435	0.3522	downregulated	1	1.3412	0.2615	downregulated	1	3.96044	0.0191	downregulated	1	4.43644	0.0118	upregulated	1	1.479	0.2279	upregulated	2	1.6038	0.2011	upregulated	3	0.943776	0.3892	upregulated	2	1.61751	0.1984
craniofacial suture morphogenesis	GO	6 out of 8	16.3984									downregulated	1	0.805564	0.4468	downregulated	1	0.819797	0.4405	upregulated	2	2.9653	0.0515	upregulated	3	4.88743	0.0075	upregulated	3	3.25371	0.0386	upregulated	3	3.66664	0.0256
urogenital system development	GO	4 out of 8	16.3631	upregulated	14	4.91829	0.0073	downregulated	5	2.0314	0.1312	downregulated	19	3.30087	0.0369	downregulated	16	7.97415	0.0003	upregulated	11	7.409	0.0006	upregulated	22	4.7364	0.0088	upregulated	25	2.26812	0.1035	upregulated	14	1.94956	0.1423
tertiary granule lumen	GO	7 out of 8	16.3493	downregulated	1	2.60215	0.0741	upregulated	1	0.878843	0.4153	downregulated	5	5.26302	0.0052	downregulated	4	6.36937	0.0017	upregulated	1	1.40153	0.2462	upregulated	3	0.610257	0.5432	upregulated	2	0.542441	0.5813	upregulated	1	0.439424	0.6444
transcription factor activity, transcription factor binding	GO	7 out of 8	16.3217	downregulated	2	0.572956	0.5639	upregulated	4	3.16025	0.0424	downregulated	2	2.97711	0.0509	downregulated	5	2.97235	0.0512	upregulated	2	2.02416	0.1321	upregulated	8	5.06843	0.0063	upregulated	9	4.05353	0.0174	upregulated	7	1.81348	0.1631
positive regulation of cell motility	GO	4 out of 8	16.2011	downregulated	14	5.25652	0.0052	upregulated	16	5.63097	0.0036	downregulated	46	14.8709	3.5e-07	downregulated	27	8.43898	0.0002	downregulated	18	3.14209	0.0432	downregulated	28	4.00325	0.0183	upregulated	46	3.71489	0.0244	downregulated	27	3.30385	0.0367
negative regulation of response to wounding	GO	7 out of 8	16.1564	downregulated	3	1.83304	0.1599	upregulated	5	2.17051	0.1141	downregulated	7	3.80779	0.0222	downregulated	5	2.99441	0.0501	upregulated	2	2.661	0.0699	upregulated	7	2.45806	0.0856	upregulated	9	2.71953	0.0659	upregulated	7	1.85311	0.1567
hindbrain morphogenesis	GO	6 out of 8	16.1273					upregulated	1	0.64862	0.5228	downregulated	4	2.34636	0.0957	downregulated	1	0.62516	0.5352	upregulated	2	2.92976	0.0534	upregulated	5	4.07519	0.017	upregulated	6	3.12063	0.0441	upregulated	5	3.67887	0.0253
organic acid transmembrane transport	GO	5 out of 8	16.0869	upregulated	8	2.30245	0.1	upregulated	3	1.92174	0.1464	downregulated	15	5.17431	0.0057	downregulated	7	3.72656	0.0241	upregulated	5	4.73239	0.0088	upregulated	11	4.5368	0.0107	upregulated	13	2.77854	0.0621	upregulated	11	4.5368	0.0107
carboxylic acid transmembrane transport	GO	5 out of 8	16.0869	upregulated	8	2.30245	0.1	upregulated	3	1.92174	0.1464	downregulated	15	5.17431	0.0057	downregulated	7	3.72656	0.0241	upregulated	5	4.73239	0.0088	upregulated	11	4.5368	0.0107	upregulated	13	2.77854	0.0621	upregulated	11	4.5368	0.0107
positive regulation of lipid localization	GO	5 out of 8	16.0672	upregulated	3	2.32464	0.0978	upregulated	5	1.8691	0.1543	downregulated	6	5.43191	0.0044	downregulated	6	6.32753	0.0018	upregulated	1	1.81212	0.1633	upregulated	4	1.91697	0.1471	upregulated	4	3.85572	0.0212	upregulated	3	2.83362	0.0588
regulation of membrane lipid distribution	GO	6 out of 8	16.0133	downregulated	2	1.50893	0.2211	upregulated	2	1.52656	0.2173	downregulated	4	4.44116	0.0118	downregulated	4	4.97507	0.0069	upregulated	1	2.50566	0.0816	upregulated	3	3.17647	0.0417	upregulated	3	1.06394	0.3451	downregulated	1	0.131359	0.8769
gland development	GO	6 out of 8	15.9871	downregulated	14	4.56983	0.0104	upregulated	8	2.74059	0.0645	downregulated	32	3.8256	0.0218	upregulated	8	4.00663	0.0182	upregulated	13	3.11125	0.0445	upregulated	40	3.87468	0.0208	upregulated	47	3.04789	0.0475	upregulated	35	4.30507	0.0135
Fc-gamma receptor signaling pathway involved in phagocytosis	GO	5 out of 8	15.9322	downregulated	5	2.89488	0.0553	downregulated	1	2.92908	0.0534	downregulated	10	5.39279	0.0045	downregulated	8	4.91838	0.0073	upregulated	1	2.11892	0.1202	downregulated	5	1.39108	0.2488	downregulated	5	0.930737	0.3943	upregulated	2	1.00339	0.3666
negative regulation of stem cell differentiation	GO	6 out of 8	15.925	downregulated	2	1.78791	0.1673	upregulated	2	3.02115	0.0487	downregulated	2	0.633727	0.5306					upregulated	2	4.65629	0.0095	upregulated	4	4.70226	0.0091	upregulated	4	4.04294	0.0175	upregulated	2	3.123	0.044
positive regulation of neuron migration	GO	6 out of 8	15.9245									downregulated	3	4.36899	0.0127	downregulated	1	1.24249	0.2887	upregulated	1	3.27803	0.0377	upregulated	3	2.15961	0.1154	upregulated	3	2.40169	0.0906	upregulated	3	2.47366	0.0843
embryonic digestive tract development	GO	6 out of 8	15.8915	downregulated	2	1.54239	0.2139					downregulated	3	2.41082	0.0897	upregulated	1	2.33247	0.0971	upregulated	3	4.61348	0.0099	upregulated	3	3.14673	0.043	upregulated	5	2.15527	0.1159	upregulated	5	4.35527	0.0128
regulation of mitotic cell cycle phase transition	GO	6 out of 8	15.8578	upregulated	21	1.72224	0.1787	upregulated	20	5.95205	0.0026	downregulated	40	13.4416	1.5e-06	downregulated	25	6.95965	0.0009	upregulated	5	0.38911	0.6777	upregulated	29	0.90536	0.4044	upregulated	35	0.955334	0.3847	upregulated	32	0.881131	0.4143
reactive nitrogen species metabolic process	GO	4 out of 8	15.8398									upregulated	2	3.21241	0.0403	downregulated	1	3.44137	0.032	upregulated	1	3.94352	0.0194	upregulated	2	4.32	0.0133	upregulated	1	3.18542	0.0414	upregulated	3	7.34732	0.0006
renal tubule morphogenesis	GO	7 out of 8	15.786	upregulated	4	2.66735	0.0694	downregulated	3	2.59636	0.0745	downregulated	7	6.34919	0.0017	downregulated	4	3.51447	0.0298	upregulated	3	3.08073	0.0459	upregulated	5	1.07205	0.3423	upregulated	5	1.02964	0.3571	upregulated	3	0.810893	0.4445
female sex differentiation	GO	6 out of 8	15.7223	downregulated	5	2.27889	0.1024	upregulated	2	1.45551	0.2333	downregulated	6	3.23075	0.0395	downregulated	4	1.32629	0.2655	downregulated	4	3.3304	0.0358	upregulated	6	4.03606	0.0177	upregulated	9	1.667	0.1888	upregulated	5	4.6388	0.0097
membrane microdomain	GO	2 out of 8	15.6877	upregulated	7	2.6531	0.0704	upregulated	8	6.66245	0.0013	downregulated	30	14.075	7.7e-07	downregulated	29	19.2831	4.2e-09	downregulated	13	1.72379	0.1784	downregulated	23	2.75138	0.0638	downregulated	19	2.7715	0.0626	downregulated	12	1.10814	0.3302
membrane raft	GO	2 out of 8	15.6877	upregulated	7	2.6531	0.0704	upregulated	8	6.66245	0.0013	downregulated	30	14.075	7.7e-07	downregulated	29	19.2831	4.2e-09	downregulated	13	1.72379	0.1784	downregulated	23	2.75138	0.0638	downregulated	19	2.7715	0.0626	downregulated	12	1.10814	0.3302
phosphatidylinositol-3-phosphate biosynthetic process	GO	7 out of 8	15.666	upregulated	5	3.07926	0.046	downregulated	2	1.11472	0.328	downregulated	5	7.00247	0.0009	downregulated	3	2.8788	0.0562	upregulated	1	2.15423	0.116	upregulated	4	1.49814	0.2235	upregulated	5	1.72341	0.1785	upregulated	6	2.37351	0.0932
cell adhesion molecule binding	GO	6 out of 8	15.6337	upregulated	15	0.660364	0.5167	upregulated	16	1.14391	0.3186	downregulated	42	6.21114	0.002	downregulated	29	5.14738	0.0058	upregulated	10	0.763625	0.466	upregulated	40	1.11483	0.328	upregulated	47	1.57538	0.2069	upregulated	29	2.62562	0.0724
positive regulation of chromosome separation	GO	5 out of 8	15.6296									downregulated	3	5.11383	0.006	downregulated	3	4.33083	0.0132					upregulated	2	2.31132	0.0991	upregulated	2	2.68705	0.0681	upregulated	2	1.18654	0.3053
virion binding	GO	4 out of 8	15.5952	downregulated	3	7.69882	0.0005													upregulated	1	3.67583	0.0253	upregulated	1	2.66825	0.0694	upregulated	1	1.55229	0.2118
cysteine-type peptidase activity	GO	7 out of 8	15.5781	downregulated	3	0.874644	0.417	upregulated	16	6.31361	0.0018	downregulated	16	4.31779	0.0133	downregulated	13	5.69779	0.0034	upregulated	5	1.60495	0.2009	upregulated	17	3.64274	0.0262	upregulated	22	4.04729	0.0175	upregulated	14	1.70654	0.1815
positive regulation of endoplasmic reticulum unfolded protein response	GO	6 out of 8	15.5589									downregulated	2	3.17061	0.042	downregulated	1	0.746405	0.4741	upregulated	1	2.90985	0.0545	upregulated	3	2.83065	0.059	upregulated	5	3.27807	0.0377	upregulated	2	2.62332	0.0726
positive regulation of cysteine-type endopeptidase activity	GO	6 out of 8	15.5413	downregulated	6	2.33499	0.0968	upregulated	3	4.87947	0.0076	downregulated	14	10.9912	1.7e-05	downregulated	7	1.07821	0.3402	upregulated	3	1.9704	0.1394	downregulated	7	2.31329	0.0989	upregulated	16	2.65964	0.07	upregulated	13	1.38626	0.25
regulation of hemopoiesis	GO	4 out of 8	15.5087	upregulated	7	0.909335	0.4028	upregulated	8	3.37372	0.0343	downregulated	38	7.87607	0.0004	downregulated	23	9.84954	5.3e-05	downregulated	6	4.1695	0.0155	downregulated	14	3.65262	0.0259	upregulated	40	4.09085	0.0167	upregulated	32	2.1448	0.1171
ureteric bud development	GO	4 out of 8	15.5019	upregulated	4	4.78588	0.0083	upregulated	2	1.02685	0.3581	downregulated	6	4.07952	0.0169	downregulated	3	2.7305	0.0652	upregulated	3	2.26031	0.1043	upregulated	7	4.14999	0.0158	upregulated	9	4.92918	0.0072	upregulated	6	4.16242	0.0156
embryo implantation	GO	5 out of 8	15.4986	downregulated	3	8.56552	0.0002	downregulated	2	2.93624	0.0531	downregulated	2	2.68704	0.0681	downregulated	1	1.8957	0.1502					upregulated	1	0.192817	0.8246	downregulated	1	0.504427	0.6039	downregulated	2	0.274253	0.7601
cellular response to vascular endothelial growth factor stimulus	GO	6 out of 8	15.4622	downregulated	4	6.18911	0.0021	downregulated	2	1.44401	0.236	downregulated	4	2.59518	0.0746	downregulated	1	0.945159	0.3886	upregulated	2	5.6413	0.0035	upregulated	2	1.7976	0.1657	upregulated	4	1.43451	0.2382	downregulated	3	3.15016	0.0428
negative regulation of sprouting angiogenesis	GO	6 out of 8	15.4452	downregulated	3	4.22399	0.0146	upregulated	1	0.484344	0.6161	downregulated	2	4.57412	0.0103	downregulated	3	3.40324	0.0333	upregulated	1	2.85285	0.0577	upregulated	2	0.928433	0.3952	upregulated	3	1.60875	0.2001	downregulated	4	1.66184	0.1898
keratinocyte differentiation	GO	6 out of 8	15.3999	downregulated	4	1.38958	0.2492	downregulated	4	2.70403	0.0669	upregulated	2	1.28205	0.2775	upregulated	2	1.10688	0.3306	upregulated	3	3.66852	0.0255	upregulated	6	3.66852	0.0255	upregulated	9	3.17111	0.042	upregulated	5	3.1871	0.0413
extrinsic apoptotic signaling pathway	GO	7 out of 8	15.3779	downregulated	2	0.365106	0.6941	upregulated	2	4.49575	0.0112	downregulated	4	6.18815	0.0021	downregulated	4	1.90173	0.1493	upregulated	4	5.95935	0.0026	upregulated	9	1.9895	0.1368	upregulated	10	1.70147	0.1824	upregulated	6	1.7683	0.1706
photoreceptor cell development	GO	6 out of 8	15.3556	upregulated	2	4.01839	0.018	downregulated	1	1.55904	0.2103	upregulated	1	0.479936	0.6188	downregulated	1	0.389486	0.6774	upregulated	2	3.94197	0.0194	upregulated	2	4.1177	0.0163	upregulated	3	3.70781	0.0245	upregulated	3	6.13792	0.0022
regulation of fatty acid transport	GO	7 out of 8	15.2699					downregulated	1	1.02018	0.3605	downregulated	2	2.70827	0.0667	downregulated	3	5.43877	0.0043	upregulated	1	2.74964	0.064	upregulated	4	1.85222	0.1569	upregulated	2	1.03699	0.3545	upregulated	2	0.463808	0.6289
aorta morphogenesis	GO	7 out of 8	15.2595	downregulated	2	1.64928	0.1922	upregulated	1	2.14815	0.1167	downregulated	2	1.1181	0.3269	downregulated	1	0.859694	0.4233	upregulated	2	2.35642	0.0948	upregulated	6	4.18489	0.0152	upregulated	7	3.77899	0.0228	upregulated	4	3.46023	0.0314
regulation of double-strand break repair	GO	5 out of 8	15.2453	upregulated	4	0.921399	0.398	upregulated	3	1.95667	0.1413	upregulated	3	1.39102	0.2488	downregulated	4	1.9779	0.1384	upregulated	3	3.52067	0.0296	upregulated	7	4.80941	0.0082	upregulated	9	6.75573	0.0012	upregulated	5	2.45069	0.0862
protein C-terminus binding	GO	6 out of 8	15.2235	upregulated	11	1.58274	0.2054	upregulated	9	2.42623	0.0884	downregulated	15	2.72273	0.0657	downregulated	9	1.43767	0.2375	upregulated	5	2.20704	0.11	upregulated	19	4.66288	0.0094	upregulated	21	3.1999	0.0408	upregulated	16	2.57599	0.0761
mesenchymal cell development	GO	5 out of 8	15.1954	downregulated	4	1.8744	0.1534	upregulated	2	3.72084	0.0242	downregulated	12	11.3768	1.1e-05	downregulated	3	0.992012	0.3708	upregulated	3	3.21093	0.0403	upregulated	10	3.17638	0.0417	downregulated	4	0.609589	0.5436	downregulated	3	1.10474	0.3313
nucleus localization	GO	6 out of 8	15.1568					upregulated	3	4.67268	0.0093	downregulated	7	10.5465	2.6e-05	downregulated	2	2.85821	0.0574	upregulated	1	1.6828	0.1859	upregulated	3	1.73986	0.1755	upregulated	4	1.89689	0.15	upregulated	3	1.10524	0.3311
beta-catenin binding	GO	6 out of 8	15.1225	downregulated	4	1.63952	0.1941	upregulated	2	1.57776	0.2064	downregulated	8	4.41783	0.0121	downregulated	3	2.26802	0.1035	upregulated	3	3.01008	0.0493	upregulated	6	2.93515	0.0531	downregulated	6	1.39924	0.2468	upregulated	10	3.82889	0.0217
cellular biogenic amine metabolic process	GO	6 out of 8	15.075	downregulated	3	4.83697	0.0079	upregulated	2	0.630243	0.5325	upregulated	4	4.48458	0.0113	downregulated	3	2.74959	0.064	upregulated	1	1.81052	0.1636	upregulated	4	2.27714	0.1026	upregulated	5	2.14098	0.1175	upregulated	4	1.89002	0.1511
viral genome replication	GO	7 out of 8	15.0578	upregulated	2	1.13827	0.3204	downregulated	1	4.17328	0.0154	downregulated	3	2.6901	0.0679	downregulated	1	2.04522	0.1294	upregulated	1	2.61706	0.073	upregulated	2	1.90901	0.1482	upregulated	3	1.54145	0.2141	upregulated	1	1.21996	0.2952
nuclear migration	GO	6 out of 8	15.0348					upregulated	3	5.11592	0.006	downregulated	6	9.37531	8.5e-05	downregulated	2	3.03572	0.048	upregulated	1	1.8486	0.1575	upregulated	3	2.108	0.1215	upregulated	4	2.44199	0.087	upregulated	3	1.34112	0.2616
neuronal stem cell population maintenance	GO	6 out of 8	15.0229	downregulated	2	1.70671	0.1815	upregulated	1	0.429701	0.6507	downregulated	2	1.12785	0.3237	upregulated	1	1.63214	0.1955	upregulated	3	3.69194	0.0249	upregulated	4	4.36615	0.0127	upregulated	6	4.72469	0.0089	upregulated	3	1.4674	0.2305
cerebellar cortex formation	GO	5 out of 8	15.0181									downregulated	3	3.17317	0.0419					upregulated	2	4.01733	0.018	upregulated	3	2.90236	0.0549	upregulated	3	2.55471	0.0777	upregulated	1	2.37053	0.0934
ERBB signaling pathway	GO	6 out of 8	14.9951	downregulated	4	1.70301	0.1821	upregulated	2	1.09387	0.3349	downregulated	6	3.89073	0.0204	downregulated	6	2.00662	0.1344	upregulated	3	3.27483	0.0378	upregulated	10	3.66159	0.0257	downregulated	4	2.72564	0.0655	upregulated	7	4.27779	0.0139
response to ketone	GO	6 out of 8	14.9931	downregulated	4	4.93239	0.0072	upregulated	8	3.47385	0.031	downregulated	11	3.18543	0.0414	downregulated	12	5.28818	0.0051	downregulated	7	3.44739	0.0318	upregulated	13	3.8723	0.0208	upregulated	19	2.78149	0.0619	upregulated	18	1.85454	0.1565
regulation of carbohydrate metabolic process by regulation of transcription from RNA polymerase II promoter	GO	5 out of 8	14.9689									downregulated	1	1.48886	0.2256					upregulated	1	1.50393	0.2223	upregulated	3	5.67818	0.0034	upregulated	3	5.14394	0.0058	upregulated	2	1.154	0.3154
regulation of animal organ morphogenesis	GO	6 out of 8	14.9673	upregulated	13	2.89404	0.0554	downregulated	7	2.91999	0.0539	downregulated	19	3.77391	0.023	upregulated	1	1.64136	0.1937	upregulated	9	4.11216	0.0164	upregulated	17	3.6354	0.0264	upregulated	22	2.72631	0.0655	upregulated	15	2.33491	0.0968
ectoderm development	GO	6 out of 8	14.9628									downregulated	4	5.28378	0.0051	downregulated	1	0.743638	0.4754	upregulated	1	1.77613	0.1693	upregulated	2	2.46757	0.0848	upregulated	3	2.2632	0.104	upregulated	3	2.42845	0.0882
regulation of hematopoietic stem cell differentiation	GO	7 out of 8	14.9311	downregulated	2	2.34411	0.0959	upregulated	2	2.21545	0.1091	downregulated	4	2.70107	0.0671	downregulated	1	0.363908	0.695	upregulated	1	2.58181	0.0756	upregulated	1	3.65472	0.0259	upregulated	3	3.13755	0.0434	upregulated	4	2.36338	0.0941
sterol transport	GO	4 out of 8	14.8949	upregulated	3	0.808329	0.4456	upregulated	4	1.9914	0.1365	downregulated	8	3.82093	0.0219	downregulated	7	10.4287	3e-05	downregulated	3	1.52933	0.2167	downregulated	5	1.8558	0.1563	upregulated	4	3.9268	0.0197	upregulated	2	2.90335	0.0548
basal part of cell	GO	6 out of 8	14.868	downregulated	1	0.506674	0.6025	upregulated	3	5.6884	0.0034	downregulated	10	11.5269	9.9e-06	downregulated	6	5.14787	0.0058	upregulated	2	2.15954	0.1154	downregulated	4	1.67503	0.1873	upregulated	9	1.20152	0.3007	upregulated	5	1.68896	0.1847
regulation of response to DNA damage stimulus	GO	5 out of 8	14.837	upregulated	14	1.61463	0.199	upregulated	11	2.90297	0.0549	upregulated	7	1.96739	0.1398	downregulated	15	10.0363	4.4e-05	upregulated	3	0.973544	0.3777	upregulated	16	3.05635	0.0471	upregulated	24	4.35244	0.0129	upregulated	15	2.90342	0.0548
RNA polymerase II transcription factor complex	GO	5 out of 8	14.8202	downregulated	9	5.16078	0.0057	upregulated	6	1.67922	0.1865	upregulated	6	1.16658	0.3114	upregulated	2	2.87967	0.0562	upregulated	6	4.1441	0.0159	upregulated	19	5.87555	0.0028	upregulated	23	3.59805	0.0274	upregulated	14	1.76719	0.1708
clathrin adaptor complex	GO	7 out of 8	14.7947	downregulated	3	4.10961	0.0164	downregulated	2	2.37523	0.093	downregulated	4	3.71293	0.0244	downregulated	1	0.384084	0.6811	upregulated	1	1.58804	0.2043	upregulated	7	2.84152	0.0583	upregulated	7	2.00604	0.1345	downregulated	4	2.22273	0.1083
regulation of developmental pigmentation	GO	5 out of 8	14.7537	downregulated	2	2.36135	0.0943					downregulated	2	2.36935	0.0935					downregulated	1	1.05282	0.349	upregulated	4	5.8688	0.0028	upregulated	4	2.8448	0.0581	upregulated	3	2.36226	0.0942
leukocyte chemotaxis	GO	6 out of 8	14.7522	upregulated	1	1.13295	0.3221	upregulated	5	4.1928	0.0151	downregulated	11	7.36539	0.0006	downregulated	7	6.44477	0.0016	upregulated	2	2.17455	0.1137	upregulated	6	1.97319	0.139	upregulated	10	1.48929	0.2255	upregulated	4	0.630741	0.5322
actin filament bundle	GO	4 out of 8	14.7411	upregulated	3	0.809917	0.4449	upregulated	6	5.9551	0.0026	upregulated	3	3.47305	0.031	upregulated	1	2.71399	0.0663	upregulated	5	5.46717	0.0042	upregulated	8	6.75037	0.0012	upregulated	7	5.52913	0.004	upregulated	7	9.94653	4.8e-05
arrestin family protein binding	GO	6 out of 8	14.7407					upregulated	1	1.19732	0.302	downregulated	1	1.42196	0.2412	downregulated	1	1.62951	0.196	upregulated	1	2.47583	0.0841	upregulated	2	3.03541	0.0481	upregulated	2	3.25423	0.0386	upregulated	2	4.12106	0.0162
photoreceptor cell differentiation	GO	6 out of 8	14.7325	upregulated	2	3.76387	0.0232	upregulated	2	2.38266	0.0923	downregulated	4	1.80121	0.1651	downregulated	1	0.26332	0.7685	upregulated	4	6.46192	0.0016	upregulated	5	3.58638	0.0277	upregulated	5	3.18653	0.0413	upregulated	4	5.57964	0.0038
regulation of cardiac muscle cell contraction	GO	7 out of 8	14.6211	downregulated	1	2.27105	0.1032	downregulated	1	3.31709	0.0363	downregulated	4	2.87896	0.0562	downregulated	1	1.54551	0.2132					upregulated	4	1.73718	0.176	upregulated	4	1.49007	0.2254	upregulated	1	1.38122	0.2513
kidney development	GO	4 out of 8	14.5919	upregulated	12	5.54457	0.0039	downregulated	5	2.70693	0.0667	downregulated	18	3.34716	0.0352	downregulated	14	8.06371	0.0003	upregulated	10	5.38246	0.0046	upregulated	20	4.21935	0.0147	upregulated	24	2.78133	0.062	upregulated	12	2.2088	0.1098
brush border	GO	4 out of 8	14.5767	downregulated	1	0.929334	0.3948	upregulated	2	0.157627	0.8542	downregulated	11	8.58677	0.0002	downregulated	7	5.75867	0.0032	upregulated	2	1.24614	0.2876	upregulated	8	3.54447	0.0289	upregulated	9	5.14563	0.0058	upregulated	8	4.6405	0.0097
regulation of epidermis development	GO	7 out of 8	14.5248	downregulated	2	2.46379	0.0851	upregulated	2	1.22491	0.2938	downregulated	7	0.894823	0.4087	downregulated	3	0.58012	0.5598	upregulated	2	2.00567	0.1346	upregulated	4	5.01587	0.0066	upregulated	6	2.72978	0.0652	upregulated	3	2.05961	0.1275
palmitoyltransferase complex	GO	4 out of 8	14.5179									downregulated	2	5.53668	0.0039	downregulated	3	7.17928	0.0008					upregulated	2	1.36626	0.2551					upregulated	1	0.43563	0.6469
renal tubule development	GO	7 out of 8	14.4169	upregulated	7	6.23429	0.002	downregulated	3	2.2085	0.1099	downregulated	9	6.01341	0.0024	downregulated	5	2.9895	0.0503	upregulated	5	5.93691	0.0026	upregulated	7	1.97308	0.139	upregulated	6	0.898911	0.407	upregulated	3	0.63083	0.5321
response to virus	GO	7 out of 8	14.4119	downregulated	10	2.62775	0.0722	upregulated	17	13.4752	1.4e-06	downregulated	18	2.54911	0.0782	downregulated	14	6.76244	0.0012	upregulated	3	0.261501	0.7699	upregulated	21	5.22322	0.0054	upregulated	24	5.44672	0.0043	upregulated	10	5.01634	0.0066
regulation of reactive oxygen species biosynthetic process	GO	7 out of 8	14.3543	downregulated	3	2.02342	0.1322	upregulated	4	8.62061	0.0002	downregulated	8	7.71852	0.0004	downregulated	7	6.61569	0.0013	upregulated	1	0.524934	0.5916	upregulated	4	1.45953	0.2323	upregulated	9	3.81303	0.0221	upregulated	7	0.819767	0.4405
toxin transport	GO	7 out of 8	14.3469	downregulated	1	1.79923	0.1654	downregulated	1	1.61472	0.1989	upregulated	2	1.56796	0.2085	downregulated	1	0.806216	0.4465	upregulated	1	1.40153	0.2462	upregulated	5	3.56458	0.0283	upregulated	5	3.65821	0.0258	upregulated	6	3.07041	0.0464
B cell activation	GO	4 out of 8	14.3172	upregulated	4	1.75978	0.1721	downregulated	1	0.113539	0.8927	downregulated	16	9.88743	5.1e-05	downregulated	13	8.51459	0.0002	downregulated	4	3.59972	0.0273	upregulated	10	2.61053	0.0735	upregulated	13	3.11601	0.0443	upregulated	4	1.1611	0.3131
antimicrobial humoral response	GO	4 out of 8	14.2606	downregulated	1	1.01222	0.3634	upregulated	1	2.24599	0.1058	downregulated	9	8.67022	0.0002	downregulated	6	6.8118	0.0011													upregulated	2	0.0123883	0.9877
dendritic spine maintenance	GO	5 out of 8	14.2137									downregulated	2	4.19654	0.015	downregulated	2	2.5958	0.0746					upregulated	2	2.15156	0.1163	upregulated	3	2.99843	0.0499	upregulated	3	2.27136	0.1032
neuronal stem cell division	GO	5 out of 8	14.1712					downregulated	1	1.84398	0.1582	downregulated	2	4.65103	0.0096	upregulated	1	2.13869	0.1178					upregulated	3	1.84546	0.158	upregulated	6	4.48544	0.0113	upregulated	5	3.48395	0.0307
biomineral tissue development	GO	7 out of 8	14.0877	downregulated	3	1.59776	0.2024	upregulated	2	0.805108	0.447	downregulated	5	4.0446	0.0175	downregulated	1	1.39182	0.2486	upregulated	2	1.4724	0.2294	upregulated	5	2.35823	0.0946	upregulated	7	2.02032	0.1326	upregulated	7	2.00765	0.1343
positive regulation of sprouting angiogenesis	GO	6 out of 8	14.071	downregulated	2	4.15321	0.0157					downregulated	4	3.62743	0.0266	downregulated	1	3.0871	0.0456	downregulated	3	2.31058	0.0992	upregulated	5	2.23129	0.1074	upregulated	3	1.25577	0.2849	upregulated	3	2.02675	0.1318
response to antineoplastic agent	GO	7 out of 8	14.0537	downregulated	2	4.69172	0.0092	upregulated	6	4.87229	0.0077	downregulated	8	2.70763	0.0667	downregulated	5	2.66368	0.0697	upregulated	2	0.841385	0.4311	upregulated	9	1.77863	0.1689	upregulated	14	3.66581	0.0256	upregulated	10	2.57717	0.076
protein localization to vacuole	GO	5 out of 8	14.0524	upregulated	4	3.64554	0.0261	upregulated	2	2.08937	0.1238	downregulated	5	2.41576	0.0893	downregulated	8	7.3814	0.0006	downregulated	2	1.12229	0.3255	upregulated	7	2.97863	0.0509	upregulated	9	5.78757	0.0031	upregulated	6	2.34625	0.0957
gland morphogenesis	GO	7 out of 8	14.0461	downregulated	5	1.61836	0.1982	downregulated	2	2.79864	0.0609	downregulated	7	1.1743	0.309	upregulated	1	0.937021	0.3918	upregulated	4	3.30378	0.0367	upregulated	10	2.02381	0.1322	upregulated	13	1.42069	0.2415	upregulated	9	2.6435	0.0711
apical part of cell	GO	5 out of 8	14.0367	downregulated	11	2.79678	0.061	downregulated	7	1.76223	0.1717	downregulated	28	9.88595	5.1e-05	downregulated	16	5.39433	0.0045	downregulated	12	2.01994	0.1327	downregulated	17	2.6207	0.0728	downregulated	21	2.53813	0.079	upregulated	18	1.37622	0.2525
regulation of execution phase of apoptosis	GO	6 out of 8	14.0363	upregulated	1	2.09151	0.1235					downregulated	5	4.5007	0.0111	downregulated	4	4.29227	0.0137	upregulated	1	2.6254	0.0724	upregulated	3	2.35852	0.0946	upregulated	3	1.48315	0.2269	upregulated	1	0.867818	0.4199
actin-based cell projection	GO	5 out of 8	14.0234	downregulated	4	5.0596	0.0063	downregulated	3	2.341	0.0962	downregulated	20	5.18371	0.0056	downregulated	11	8.02777	0.0003	downregulated	9	2.76675	0.0629	downregulated	17	4.18683	0.0152	downregulated	17	2.55688	0.0775	upregulated	12	2.92178	0.0538
mediator complex	GO	6 out of 8	13.9803	upregulated	1	0.254801	0.7751	upregulated	2	2.16369	0.1149	downregulated	5	3.91221	0.02	downregulated	3	2.5817	0.0756	upregulated	2	2.34296	0.096	upregulated	3	1.71981	0.1791	upregulated	7	2.69774	0.0674	upregulated	5	0.980722	0.375
dendritic cell migration	GO	5 out of 8	13.9772					downregulated	1	4.75278	0.0086	downregulated	3	2.48758	0.0831									upregulated	2	1.84696	0.1577	upregulated	3	3.82512	0.0218	upregulated	1	1.0648	0.3448
vacuolar membrane	GO	4 out of 8	13.8607	upregulated	16	3.99927	0.0183	upregulated	21	5.36863	0.0047	downregulated	43	27.8604	7.9e-13	downregulated	35	24.4563	2.4e-11	upregulated	12	3.58678	0.0277	upregulated	31	4.44319	0.0118	upregulated	41	3.99598	0.0184	upregulated	28	1.83476	0.1597
regulation of cell morphogenesis	GO	4 out of 8	13.8543	downregulated	15	7.30153	0.0007	downregulated	6	1.44267	0.2363	downregulated	62	25.4796	8.6e-12	downregulated	36	16.2531	8.7e-08	downregulated	27	7.63713	0.0005	downregulated	51	14.4965	5.1e-07	downregulated	54	8.19623	0.0003	downregulated	39	6.29269	0.0018
cellular response to decreased oxygen levels	GO	5 out of 8	13.8384	downregulated	9	9.12464	0.0001	upregulated	7	1.42841	0.2397	downregulated	12	1.7947	0.1662	downregulated	5	1.46299	0.2315	upregulated	3	2.06141	0.1273	downregulated	11	2.02969	0.1314	downregulated	9	1.6163	0.1986	upregulated	18	2.43933	0.0872
myosin complex	GO	6 out of 8	13.7721	downregulated	2	3.0996	0.0451	downregulated	1	0.376892	0.686	downregulated	8	6.00055	0.0025	downregulated	4	4.03608	0.0177	upregulated	2	1.51633	0.2195	upregulated	3	1.25538	0.285	downregulated	4	1.04118	0.353	downregulated	5	1.47158	0.2296
PcG protein complex	GO	7 out of 8	13.7694	downregulated	1	3.55339	0.0286	upregulated	3	4.31592	0.0134	downregulated	4	1.26538	0.2821	downregulated	1	0.367258	0.6926	upregulated	1	0.37152	0.6897	upregulated	6	2.42222	0.0887	upregulated	10	5.63707	0.0036	upregulated	7	4.46852	0.0115
neurexin family protein binding	GO	4 out of 8	13.7588	upregulated	1	1.40707	0.2449	upregulated	1	4.32254	0.0133	upregulated	1	1.96962	0.1395					upregulated	1	6.26927	0.0019	upregulated	2	5.00674	0.0067	upregulated	2	6.04635	0.0024	upregulated	1	4.13572	0.016
germ cell development	GO	5 out of 8	13.7509	upregulated	10	1.13215	0.3223	downregulated	3	3.70543	0.0246	upregulated	9	3.94498	0.0194	downregulated	14	6.34017	0.0018	upregulated	5	1.91976	0.1466	upregulated	11	3.14766	0.043	upregulated	22	2.74028	0.0646	upregulated	13	2.8945	0.0553
negative regulation of hemopoiesis	GO	7 out of 8	13.7357	downregulated	4	0.794147	0.452	upregulated	4	6.25185	0.0019	downregulated	11	3.44644	0.0319	downregulated	7	3.24601	0.0389	upregulated	3	2.87865	0.0562	upregulated	16	2.87865	0.0562	upregulated	13	3.58447	0.0278	upregulated	11	3.15918	0.0425
long-chain fatty acid import	GO	4 out of 8	13.6911					upregulated	2	3.02022	0.0488	upregulated	2	4.40345	0.0122					upregulated	2	4.00134	0.0183	upregulated	2	3.92783	0.0197	upregulated	2	8.21793	0.0003	upregulated	1	4.96763	0.007
extrinsic component of membrane	GO	6 out of 8	13.6896	upregulated	12	4.39457	0.0123	upregulated	5	4.30172	0.0135	downregulated	16	3.54892	0.0288	downregulated	20	6.05089	0.0024	upregulated	5	3.25151	0.0387	upregulated	23	3.02676	0.0485	upregulated	27	2.9926	0.0502	upregulated	20	3.51522	0.0297
negative regulation of extracellular matrix organization	GO	5 out of 8	13.6754	downregulated	3	6.64478	0.0013					upregulated	1	2.56156	0.0772	downregulated	1	1.25661	0.2846					upregulated	1	2.31377	0.0989	upregulated	1	2.75931	0.0633	upregulated	1	3.26249	0.0383
cilium or flagellum-dependent cell motility	GO	3 out of 8	13.6334	upregulated	1	0.456745	0.6333					downregulated	1	2.90495	0.0548									upregulated	4	3.74097	0.0237	upregulated	7	8.25612	0.0003	upregulated	2	1.63633	0.1947
positive regulation of ERBB signaling pathway	GO	6 out of 8	13.5484	downregulated	3	4.77867	0.0084	upregulated	1	0.652769	0.5206	downregulated	4	4.47847	0.0114	downregulated	2	1.33126	0.2641	upregulated	1	1.81215	0.1633	upregulated	2	1.24895	0.2868	upregulated	3	0.851117	0.4269	downregulated	2	0.29949	0.7412
regulation of cell cycle phase transition	GO	6 out of 8	13.5452	upregulated	21	1.25163	0.286	upregulated	23	6.49121	0.0015	downregulated	40	11.4674	1e-05	downregulated	27	7.31568	0.0007	upregulated	5	0.331139	0.7181	upregulated	30	0.667236	0.5131	upregulated	38	0.762511	0.4665	upregulated	34	0.744072	0.4752
protein heterodimerization activity	GO	6 out of 8	13.4903	downregulated	12	2.23452	0.107	upregulated	25	11.3206	1.2e-05	downregulated	41	6.57051	0.0014	downregulated	32	8.9987	0.0001	upregulated	12	4.2522	0.0142	upregulated	36	2.54626	0.0784	downregulated	23	1.61195	0.1995	upregulated	30	1.8207	0.1619
peptidyl-tyrosine autophosphorylation	GO	5 out of 8	13.4636	upregulated	1	0.225539	0.7981	upregulated	1	1.10736	0.3304	downregulated	5	6.02632	0.0024	downregulated	6	5.94319	0.0026					upregulated	3	0.445237	0.6407	upregulated	3	0.531171	0.5879	upregulated	3	1.85055	0.1572
signal transduction by p53 class mediator	GO	6 out of 8	13.4518	downregulated	1	1.66193	0.1898	upregulated	5	1.99019	0.1367	downregulated	12	4.45862	0.0116	downregulated	6	2.20759	0.11	upregulated	4	3.50584	0.03	upregulated	9	2.69278	0.0677	upregulated	15	1.32805	0.265	downregulated	5	0.412791	0.6618
segmentation	GO	6 out of 8	13.4085	downregulated	3	1.86362	0.1551	downregulated	2	0.8979	0.4074	downregulated	10	5.71832	0.0033	downregulated	6	2.96524	0.0515	upregulated	2	0.656849	0.5185	upregulated	10	2.4442	0.0868	upregulated	12	2.053	0.1283	downregulated	8	1.32705	0.2653
regulation of actin cytoskeleton reorganization	GO	5 out of 8	13.4078	downregulated	2	4.5151	0.0109	downregulated	1	4.123	0.0162	downregulated	4	2.62669	0.0723									upregulated	1	0.710036	0.4916	upregulated	1	1.43302	0.2386
antioxidant activity	GO	7 out of 8	13.3883	downregulated	2	1.29228	0.2746	upregulated	4	2.29157	0.1011	downregulated	5	6.81861	0.0011	downregulated	3	3.60336	0.0272	upregulated	1	2.00569	0.1346	upregulated	2	1.02176	0.36	upregulated	3	0.629532	0.5328	upregulated	4	0.308614	0.7345
transferase activity, transferring acyl groups other than amino-acyl groups	GO	6 out of 8	13.3869	upregulated	10	0.801356	0.4487	upregulated	12	3.3302	0.0358	downregulated	13	3.16242	0.0423	downregulated	9	2.00156	0.1351	upregulated	3	0.577905	0.5611	upregulated	24	2.24745	0.1057	upregulated	24	2.27388	0.1029	upregulated	27	7.25522	0.0007
activin binding	GO	6 out of 8	13.3671	upregulated	4	4.57594	0.0103					downregulated	2	2.19094	0.1118	downregulated	2	2.45145	0.0862	upregulated	1	2.51518	0.0808	upregulated	2	3.74826	0.0236	upregulated	3	5.43947	0.0043	upregulated	1	1.59776	0.2023
vesicle coat	GO	7 out of 8	13.3206	downregulated	3	3.00988	0.0493	downregulated	2	1.68126	0.1861	downregulated	5	2.87942	0.0562	downregulated	4	1.58584	0.2048	upregulated	2	2.98996	0.0503	upregulated	8	1.33885	0.2621	upregulated	7	1.34968	0.2593	downregulated	3	1.51429	0.22
alpha-linolenic acid metabolic process	GO	5 out of 8	13.2887	downregulated	1	1.47266	0.2293	downregulated	1	1.94866	0.1425	downregulated	3	4.44548	0.0117	downregulated	3	4.93879	0.0072													upregulated	1	0.483064	0.6169
amelogenesis	GO	6 out of 8	13.2786	downregulated	2	3.31063	0.0365					downregulated	2	0.676393	0.5084					upregulated	1	1.00262	0.3669	upregulated	3	2.88794	0.0557	upregulated	3	3.5025	0.0301	upregulated	2	1.89851	0.1498
transcription coactivator binding	GO	5 out of 8	13.271	upregulated	1	0.292769	0.7462					downregulated	1	0.278813	0.7567					upregulated	2	2.24198	0.1062	upregulated	3	3.16337	0.0423	upregulated	3	3.25593	0.0385	upregulated	4	4.62369	0.0098
myosin II complex	GO	5 out of 8	13.2577					downregulated	1	1.13362	0.3219	downregulated	5	6.13436	0.0022	downregulated	2	5.01702	0.0066	upregulated	1	1.07254	0.3421	upregulated	2	0.494536	0.6099					downregulated	2	0.594393	0.5519
regulation of chromatin organization	GO	7 out of 8	13.1721	downregulated	4	2.04724	0.1291	downregulated	3	3.15678	0.0426	downregulated	15	2.05426	0.1282	downregulated	10	2.12172	0.1198	downregulated	4	0.261292	0.7701	upregulated	12	0.996953	0.369	upregulated	19	1.35687	0.2575	upregulated	17	1.43826	0.2373
morphogenesis of a branching structure	GO	4 out of 8	13.0916	downregulated	9	2.91359	0.0543	upregulated	2	0.845273	0.4294	downregulated	14	6.84089	0.0011	upregulated	1	0.617426	0.5393	upregulated	6	3.53995	0.029	upregulated	19	4.69974	0.0091	upregulated	20	3.10686	0.0447	upregulated	9	1.745	0.1746
cellular response to toxic substance	GO	6 out of 8	13.0805	downregulated	8	5.19253	0.0056	upregulated	13	6.62204	0.0013	downregulated	19	7.17982	0.0008	downregulated	12	6.07794	0.0023	upregulated	3	1.10614	0.3308	downregulated	8	0.57923	0.5603	upregulated	6	0.363225	0.6954	upregulated	11	0.362082	0.6962
negative regulation of ATP metabolic process	GO	6 out of 8	13.0754	upregulated	2	1.43589	0.2379	downregulated	1	5.27525	0.0051	downregulated	1	0.495734	0.6091					upregulated	1	1.16623	0.3115	upregulated	3	2.78109	0.062	upregulated	4	3.2466	0.0389	upregulated	3	1.54643	0.213
regulation of ERBB signaling pathway	GO	5 out of 8	13.0392	downregulated	4	3.23724	0.0393	downregulated	2	3.05541	0.0471	downregulated	10	7.22735	0.0007	downregulated	6	2.3122	0.099	upregulated	1	0.869483	0.4192	downregulated	4	0.55855	0.572	downregulated	6	1.23612	0.2905	downregulated	7	1.86778	0.1545
positive regulation of leukocyte apoptotic process	GO	6 out of 8	13.0279	upregulated	2	3.84553	0.0214					downregulated	5	6.638	0.0013	downregulated	2	3.39873	0.0334	upregulated	1	2.76619	0.0629	upregulated	3	1.86792	0.1544	upregulated	2	0.847063	0.4287	upregulated	2	1.35555	0.2578
transferase activity, transferring alkyl or aryl (other than methyl) groups	GO	6 out of 8	13.0095	upregulated	2	1.06753	0.3439	upregulated	4	2.80057	0.0608	downregulated	5	3.58848	0.0276	downregulated	5	5.73185	0.0032	upregulated	2	1.69227	0.1841	upregulated	4	2.50274	0.0819	upregulated	4	1.99221	0.1364	upregulated	5	1.37005	0.2541
clathrin-dependent endocytosis	GO	6 out of 8	13.006	downregulated	1	2.01041	0.1339	downregulated	1	1.19915	0.3015	downregulated	2	4.33736	0.0131					upregulated	2	3.90281	0.0202	upregulated	3	2.60022	0.0743	upregulated	4	1.78153	0.1684	downregulated	2	2.82543	0.0593
cytoplasmic side of endoplasmic reticulum membrane	GO	5 out of 8	12.9944													downregulated	1	1.33827	0.2623	upregulated	1	1.69098	0.1843	upregulated	3	2.92062	0.0539	upregulated	3	2.74682	0.0641	upregulated	5	4.29774	0.0136
lens development in camera-type eye	GO	4 out of 8	12.9654	downregulated	3	2.3145	0.0988	upregulated	2	2.21428	0.1092	downregulated	5	2.66148	0.0698	upregulated	2	1.83664	0.1594	upregulated	2	4.56633	0.0104	upregulated	6	2.97824	0.0509	upregulated	7	2.74818	0.064	upregulated	4	2.67263	0.0691
azurophil granule lumen	GO	2 out of 8	12.9653	upregulated	1	0.234034	0.7913	upregulated	6	2.72787	0.0654	downregulated	13	7.56765	0.0005	downregulated	9	8.97239	0.0001	downregulated	1	0.142781	0.8669	downregulated	2	0.154159	0.8571	downregulated	2	0.243766	0.7837	downregulated	3	0.0721648	0.9304
negative regulation of intrinsic apoptotic signaling pathway in response to DNA damage	GO	5 out of 8	12.9407	upregulated	2	0.754149	0.4704	upregulated	3	3.30019	0.0369	downregulated	1	2.26298	0.104	downregulated	4	8.821	0.0001					upregulated	3	2.51264	0.0811	upregulated	3	2.43997	0.0872	upregulated	2	0.958449	0.3835
RNA transport	GO	5 out of 8	12.9187	downregulated	3	0.394156	0.6742	upregulated	9	2.35557	0.0948	downregulated	19	5.52713	0.004	downregulated	15	8.15931	0.0003	upregulated	2	1.80399	0.1646	downregulated	12	1.09973	0.333	downregulated	9	0.758036	0.4686	upregulated	16	1.24746	0.2872
core promoter binding	GO	5 out of 8	12.8932	upregulated	2	0.367639	0.6924	upregulated	2	0.864723	0.4212	upregulated	2	2.12272	0.1197	downregulated	3	1.30829	0.2703	upregulated	3	2.62998	0.0721	upregulated	8	3.63368	0.0264	upregulated	10	5.19368	0.0056	upregulated	8	3.48269	0.0307
ubiquitin-like protein ligase binding	GO	6 out of 8	12.8559	upregulated	19	1.379	0.2518	upregulated	17	2.43887	0.0873	downregulated	21	3.34587	0.0352	downregulated	15	2.47008	0.0846	upregulated	8	2.8243	0.0593	upregulated	29	2.5529	0.0779	upregulated	35	1.81264	0.1632	upregulated	27	3.66795	0.0255
regulation of microglial cell activation	GO	2 out of 8	12.8321									downregulated	3	7.84287	0.0004	downregulated	3	10.8969	1.9e-05	downregulated	1	1.37076	0.2539	downregulated	2	1.69959	0.1828	downregulated	2	1.45861	0.2326	downregulated	1	1.37879	0.2519
neuroblast proliferation	GO	4 out of 8	12.8154					downregulated	1	1.27517	0.2794	downregulated	6	8.01168	0.0003	downregulated	5	9.03095	0.0001	downregulated	1	2.67207	0.0691	downregulated	2	2.19564	0.1113	upregulated	7	2.26367	0.104	downregulated	3	2.89839	0.0551
regulation of chromosome separation	GO	6 out of 8	12.7996	upregulated	4	2.32267	0.098	upregulated	3	1.30292	0.2717	downregulated	7	4.21881	0.0147	downregulated	7	6.09135	0.0023	upregulated	1	1.57339	0.2073	upregulated	5	1.25863	0.284	upregulated	7	2.71236	0.0664	upregulated	5	0.570695	0.5651
positive regulation of transcription regulatory region DNA binding	GO	7 out of 8	12.7901	downregulated	1	1.50748	0.2215	upregulated	1	1.60449	0.201	downregulated	2	4.35572	0.0128	downregulated	2	3.8103	0.0221	upregulated	1	1.31118	0.2695	upregulated	2	1.54391	0.2135	upregulated	1	1.50347	0.2224	upregulated	1	0.362578	0.6959
regulation of reactive oxygen species metabolic process	GO	6 out of 8	12.7429	downregulated	6	1.51552	0.2197	upregulated	8	6.2814	0.0019	downregulated	15	6.12621	0.0022	downregulated	13	7.101	0.0008	downregulated	3	0.166996	0.8462	upregulated	7	0.807285	0.4461	upregulated	14	3.02292	0.0487	upregulated	10	0.618396	0.5388
regulation of endoplasmic reticulum unfolded protein response	GO	6 out of 8	12.7127					upregulated	1	0.433197	0.6484	downregulated	4	2.74036	0.0645	downregulated	2	1.34212	0.2613	upregulated	1	2.49491	0.0825	upregulated	3	1.85439	0.1565	upregulated	6	2.50073	0.082	upregulated	3	2.21341	0.1093
prenyltransferase activity	GO	4 out of 8	12.7037					downregulated	1	1.32422	0.266	upregulated	3	6.06155	0.0023	downregulated	3	6.7046	0.0012	upregulated	2	3.65171	0.0259	upregulated	3	3.61299	0.027	upregulated	3	2.40483	0.0903	upregulated	4	3.0342	0.0481
establishment or maintenance of cell polarity	GO	4 out of 8	12.6746	upregulated	7	1.95547	0.1415	downregulated	4	2.31466	0.0988	downregulated	26	12.4091	4.1e-06	downregulated	14	5.39172	0.0046	upregulated	8	6.26583	0.0019	downregulated	16	4.08026	0.0169	downregulated	16	3.88652	0.0205	downregulated	15	3.78448	0.0227
viral RNA genome replication	GO	5 out of 8	12.6541	upregulated	1	0.996781	0.3691	downregulated	1	4.92982	0.0072	downregulated	3	4.65355	0.0095	downregulated	1	2.74104	0.0645					upregulated	1	0.468386	0.626	upregulated	2	0.85809	0.424
apical plasma membrane	GO	5 out of 8	12.6315	downregulated	10	3.03434	0.0481	downregulated	6	0.969583	0.3792	downregulated	24	10.8053	2e-05	downregulated	11	4.39175	0.0124	downregulated	9	2.38645	0.092	downregulated	13	3.06656	0.0466	downregulated	17	2.92537	0.0536	upregulated	14	1.8089	0.1638
regulation of intrinsic apoptotic signaling pathway in response to DNA damage	GO	5 out of 8	12.6217	upregulated	3	1.03599	0.3549	upregulated	3	3.13548	0.0435	downregulated	2	2.06571	0.1267	downregulated	6	9.07475	0.0001					upregulated	4	2.26508	0.1038	upregulated	4	2.26433	0.1039	upregulated	3	1.12327	0.3252
detection of light stimulus	GO	8 out of 8	12.5856	downregulated	2	2.35436	0.095	downregulated	1	1.58193	0.2056	downregulated	3	2.17889	0.1132	downregulated	2	2.02729	0.1317	upregulated	1	0.877859	0.4157	upregulated	1	0.880952	0.4144	upregulated	1	0.332822	0.7169	upregulated	1	2.35149	0.0952
mitotic G2/M transition checkpoint	GO	6 out of 8	12.5535	upregulated	1	0.477588	0.6203	upregulated	2	1.12408	0.325	downregulated	5	5.61175	0.0037	downregulated	4	5.23711	0.0053	upregulated	1	0.772565	0.4618	upregulated	2	0.397233	0.6722	upregulated	2	1.12383	0.325	upregulated	2	1.01267	0.3632
response to oxidative stress	GO	6 out of 8	12.4932	downregulated	10	2.58278	0.0756	upregulated	15	2.97847	0.0509	downregulated	30	6.31642	0.0018	downregulated	20	3.79809	0.0224	upregulated	3	0.565207	0.5682	upregulated	20	0.308778	0.7343	upregulated	28	2.24527	0.1059	downregulated	14	0.344845	0.7083
ovarian follicle development	GO	4 out of 8	12.4558	downregulated	3	2.94339	0.0527	upregulated	1	2.14828	0.1167	upregulated	3	2.6349	0.0717	downregulated	2	1.59076	0.2038	upregulated	2	2.57221	0.0764	upregulated	3	2.57922	0.0758	upregulated	4	1.59374	0.2032	upregulated	4	5.71067	0.0033
negative regulation of secretion by cell	GO	7 out of 8	12.4479	downregulated	4	0.468024	0.6262	upregulated	6	9.49402	7.5e-05	downregulated	10	1.61597	0.1987	downregulated	8	3.30397	0.0367	upregulated	2	3.36313	0.0346	upregulated	8	4.64953	0.0096	upregulated	10	7.19001	0.0008	upregulated	5	1.35124	0.2589
complement activation, classical pathway	GO	5 out of 8	12.3439	downregulated	3	2.62554	0.0724					downregulated	2	0.618713	0.5386	downregulated	3	6.76083	0.0012	downregulated	1	0.129317	0.8787	upregulated	1	0.910864	0.4022	upregulated	1	2.27788	0.1025	downregulated	3	0.720636	0.4864
mesodermal cell differentiation	GO	4 out of 8	12.3387	downregulated	1	1.82775	0.1608					downregulated	4	7.30462	0.0007	downregulated	2	3.57203	0.0281					upregulated	1	0.0657928	0.9363	downregulated	1	0.17401	0.8403	downregulated	1	0.257462	0.773
interleukin-2 production	GO	3 out of 8	12.336																					upregulated	2	3.41339	0.0329	upregulated	1	3.22176	0.0399	upregulated	2	5.70089	0.0033
microtubule cytoskeleton organization involved in mitosis	GO	5 out of 8	12.3321	upregulated	5	1.48772	0.2259	upregulated	5	2.22579	0.108	downregulated	14	7.72989	0.0004	downregulated	7	3.18435	0.0414	upregulated	3	2.8683	0.0568	downregulated	5	1.84858	0.1575	upregulated	8	1.74903	0.1739	upregulated	7	2.36262	0.0942
regulation of epithelial cell differentiation involved in kidney development	GO	5 out of 8	12.2394	upregulated	1	0.797152	0.4506	upregulated	1	2.59257	0.0748	upregulated	1	1.72596	0.178	downregulated	1	2.09741	0.1228	upregulated	1	3.37165	0.0343	upregulated	2	4.45895	0.0116	upregulated	2	4.27935	0.0139	upregulated	1	3.14773	0.0429
heart morphogenesis	GO	4 out of 8	12.2235	upregulated	17	6.25981	0.0019	downregulated	5	2.37804	0.0927	downregulated	15	2.82904	0.0591	downregulated	12	1.77213	0.17	upregulated	7	2.97325	0.0511	upregulated	22	5.38486	0.0046	upregulated	26	2.83851	0.0585	upregulated	17	1.02694	0.3581
neural tube development	GO	6 out of 8	12.2081	upregulated	6	1.15341	0.3156	upregulated	3	2.46993	0.0846	downregulated	11	4.14709	0.0158	downregulated	4	0.549923	0.577	upregulated	5	3.23763	0.0393	upregulated	15	2.71911	0.0659	upregulated	18	2.93048	0.0534	upregulated	7	2.24725	0.1057
motor activity	GO	3 out of 8	12.162	downregulated	4	4.75969	0.0086	upregulated	5	0.872814	0.4178	downregulated	15	3.68764	0.025	downregulated	8	3.55722	0.0285	downregulated	4	1.96458	0.1402	upregulated	14	5.36335	0.0047	upregulated	18	5.15594	0.0058	upregulated	11	3.60727	0.0271
regulation of apoptotic process involved in development	GO	5 out of 8	12.1326	downregulated	2	2.72952	0.0653													upregulated	1	2.3248	0.0978	upregulated	2	3.63919	0.0263	upregulated	2	1.37079	0.2539	upregulated	1	2.06826	0.1264
negative regulation of tumor necrosis factor superfamily cytokine production	GO	6 out of 8	12.1321	downregulated	1	1.28705	0.2761	upregulated	1	2.68145	0.0685	downregulated	5	5.64542	0.0035	downregulated	4	6.13373	0.0022	upregulated	1	0.700386	0.4964	upregulated	2	0.837295	0.4329	upregulated	3	0.441319	0.6432	downregulated	1	0.231692	0.7932
antibacterial humoral response	GO	3 out of 8	12.1318					upregulated	1	3.25438	0.0386	downregulated	4	5.45715	0.0043	downregulated	5	9.82914	5.4e-05													upregulated	1	0.0998656	0.905
blastocyst development	GO	4 out of 8	12.1257	upregulated	1	0.563198	0.5694	upregulated	3	2.67738	0.0687	downregulated	3	1.50359	0.2223	downregulated	5	3.41118	0.033	upregulated	2	1.4172	0.2424	upregulated	7	3.66009	0.0257	upregulated	6	3.63274	0.0264	upregulated	8	3.41571	0.0329
muscle cell cellular homeostasis	GO	5 out of 8	12.1098									downregulated	2	5.28472	0.0051	downregulated	1	3.40074	0.0333					upregulated	2	1.13999	0.3198	upregulated	2	1.62647	0.1966	upregulated	1	0.6579	0.5179
positive regulation of lamellipodium organization	GO	5 out of 8	12.108	upregulated	1	1.35342	0.2584	downregulated	1	4.123	0.0162	downregulated	5	3.7242	0.0241	downregulated	3	2.64492	0.071	upregulated	2	5.00923	0.0067	upregulated	3	2.36666	0.0938	downregulated	2	2.30415	0.0998	downregulated	2	2.10241	0.1222
negative regulation of neural precursor cell proliferation	GO	6 out of 8	12.101					upregulated	1	3.03253	0.0482	downregulated	2	2.58335	0.0755	downregulated	1	1.48926	0.2255	upregulated	1	2.77727	0.0622	upregulated	1	2.28401	0.1019	upregulated	1	2.07744	0.1253	upregulated	1	3.92222	0.0198
neural crest cell development	GO	4 out of 8	12.0918	upregulated	5	2.01414	0.1334	upregulated	2	3.8123	0.0221	downregulated	12	11.8391	7.2e-06	downregulated	3	1.07167	0.3424	upregulated	3	3.34078	0.0354	upregulated	10	3.47638	0.0309	downregulated	4	0.662365	0.5156	downregulated	3	1.14738	0.3175
pseudopodium	GO	5 out of 8	12.0778	upregulated	1	1.58356	0.2052	upregulated	1	0.924089	0.3969	downregulated	4	4.55279	0.0105	downregulated	2	2.78087	0.062	upregulated	1	1.87791	0.1529	upregulated	1	1.88168	0.1523	downregulated	1	1.15182	0.3161	upregulated	1	3.49216	0.0304
nitric oxide metabolic process	GO	3 out of 8	12.0649													downregulated	1	3.57293	0.0281	upregulated	1	4.05759	0.0173	upregulated	1	4.4344	0.0119	upregulated	1	3.29826	0.0369	upregulated	2	5.06758	0.0063
RNA polymerase II activating transcription factor binding	GO	6 out of 8	12.0462	downregulated	2	2.59914	0.0743	upregulated	1	0.346016	0.7075	downregulated	3	0.646701	0.5238	downregulated	3	2.78644	0.0616	upregulated	1	2.37125	0.0934	upregulated	3	1.59261	0.2034	upregulated	5	2.80498	0.0605	downregulated	1	0.408875	0.6644
cellular response to starvation	GO	5 out of 8	12.0378	downregulated	3	4.29671	0.0136	upregulated	4	1.64591	0.1928	downregulated	13	4.57506	0.0103	downregulated	10	6.46741	0.0016	downregulated	7	2.29614	0.1006	downregulated	9	2.44232	0.087	upregulated	9	1.74693	0.1743	upregulated	13	1.33605	0.2629
phosphatidylinositol binding	GO	3 out of 8	12.0268	downregulated	7	3.30963	0.0365	upregulated	5	1.34639	0.2602	downregulated	27	12.805	2.7e-06	downregulated	15	7.97163	0.0003	downregulated	11	2.72189	0.0658	downregulated	21	2.16691	0.1145	downregulated	21	3.72624	0.0241	downregulated	19	2.09809	0.1227
basal RNA polymerase II transcription machinery binding	GO	6 out of 8	12.025	upregulated	2	0.783675	0.4567	upregulated	1	0.260314	0.7708	downregulated	5	1.04869	0.3504	downregulated	2	0.823242	0.439	upregulated	1	0.863884	0.4215	upregulated	8	2.5358	0.0792	upregulated	12	4.51321	0.011	upregulated	7	3.28416	0.0375
integrin binding	GO	4 out of 8	11.988	downregulated	1	0.368309	0.6919	upregulated	2	1.36247	0.256	downregulated	14	7.08954	0.0008	downregulated	11	7.14474	0.0008	upregulated	2	1.03592	0.3549	upregulated	11	2.92763	0.0535	upregulated	12	4.82664	0.008	upregulated	5	3.19784	0.0409
cellular oxidant detoxification	GO	7 out of 8	11.9841	downregulated	2	1.12673	0.3241	upregulated	5	3.02268	0.0487	downregulated	5	6.49069	0.0015	downregulated	3	3.4911	0.0305	upregulated	1	1.92647	0.1457	upregulated	2	0.936909	0.3918	upregulated	3	0.556796	0.573	upregulated	5	0.478038	0.62
odontogenesis	GO	6 out of 8	11.9744	downregulated	4	1.73558	0.1763	upregulated	1	1.34714	0.26	downregulated	7	1.82988	0.1604	downregulated	3	0.83417	0.4342	upregulated	4	2.91106	0.0544	upregulated	10	4.2131	0.0148	upregulated	14	3.23647	0.0393	downregulated	5	1.43874	0.2372
positive regulation of telomere maintenance via telomere lengthening	GO	6 out of 8	11.9577	upregulated	3	2.69971	0.0672	downregulated	1	3.68984	0.025	downregulated	3	3.52343	0.0295	downregulated	3	4.16066	0.0156	downregulated	1	0.430503	0.6502	upregulated	2	2.39541	0.0911	upregulated	2	0.977741	0.3762	upregulated	3	0.340837	0.7112
regulation of CD4-positive, alpha-beta T cell activation	GO	7 out of 8	11.9516	downregulated	1	0.374049	0.6879					downregulated	5	2.60829	0.0737	downregulated	2	2.27493	0.1028	upregulated	1	0.487019	0.6145	upregulated	5	1.49198	0.2249	upregulated	6	3.56213	0.0284	upregulated	3	1.15323	0.3156
negative regulation of substrate adhesion-dependent cell spreading	GO	5 out of 8	11.898	downregulated	1	1.84209	0.1585					upregulated	2	3.8713	0.0208	downregulated	1	1.16316	0.3125	upregulated	1	2.68765	0.068	upregulated	2	4.26986	0.014	upregulated	2	7.09663	0.0008	downregulated	1	1.2901	0.2752
thiol-dependent ubiquitinyl hydrolase activity	GO	5 out of 8	11.8869	upregulated	7	0.866288	0.4205	upregulated	12	6.13803	0.0022	upregulated	4	1.76256	0.1716	downregulated	7	2.60529	0.0739	upregulated	4	1.94158	0.1435	upregulated	12	6.14927	0.0021	upregulated	17	6.10672	0.0022	upregulated	13	3.85094	0.0213
ubiquitinyl hydrolase activity	GO	5 out of 8	11.8869	upregulated	7	0.866288	0.4205	upregulated	12	6.13803	0.0022	upregulated	4	1.76256	0.1716	downregulated	7	2.60529	0.0739	upregulated	4	1.94158	0.1435	upregulated	12	6.14927	0.0021	upregulated	17	6.10672	0.0022	upregulated	13	3.85094	0.0213
extrinsic component of plasma membrane	GO	6 out of 8	11.8821	upregulated	7	5.96557	0.0026	upregulated	4	4.96349	0.007	downregulated	10	4.89048	0.0075	downregulated	12	5.36083	0.0047	upregulated	4	2.80263	0.0607	upregulated	14	2.65632	0.0702	upregulated	17	3.98385	0.0186	upregulated	12	3.11708	0.0443
negative regulation of immune system process	GO	4 out of 8	11.8689	downregulated	6	0.0778807	0.9251	upregulated	13	3.25884	0.0384	downregulated	39	12.1296	5.4e-06	downregulated	25	17.7949	1.9e-08	upregulated	6	1.89576	0.1502	upregulated	29	3.90443	0.0202	upregulated	29	3.90516	0.0201	upregulated	25	2.1636	0.1149
regulation of gene expression, epigenetic	GO	7 out of 8	11.804	downregulated	6	2.61191	0.0734	upregulated	14	8.59635	0.0002	downregulated	27	4.52286	0.0109	downregulated	13	2.65284	0.0705	upregulated	1	0.098472	0.9062	upregulated	23	2.73895	0.0646	upregulated	29	5.19477	0.0055	upregulated	21	2.58054	0.0757
segment specification	GO	5 out of 8	11.8029	upregulated	1	0.998685	0.3684	upregulated	1	2.35145	0.0952	downregulated	2	2.47591	0.0841	downregulated	2	4.4312	0.0119	upregulated	1	2.54427	0.0785	upregulated	2	1.90184	0.1493	upregulated	3	3.79983	0.0224
positive regulation of gene silencing by miRNA	GO	5 out of 8	11.7977	downregulated	1	0.807404	0.446					downregulated	4	1.90175	0.1493	downregulated	1	0.615894	0.5402					upregulated	5	3.10219	0.045	upregulated	5	4.11209	0.0164	upregulated	3	2.06579	0.1267
aorta development	GO	6 out of 8	11.7905	upregulated	4	1.69752	0.1831	upregulated	1	1.44015	0.2369	downregulated	5	3.96502	0.019	downregulated	3	1.38189	0.2511	upregulated	2	1.63325	0.1953	upregulated	7	3.16579	0.0422	upregulated	8	2.12925	0.1189	upregulated	4	2.65296	0.0704
heat shock protein binding	GO	4 out of 8	11.7763	downregulated	2	2.34012	0.0963	upregulated	3	2.23743	0.1067	downregulated	8	3.83648	0.0216	upregulated	1	3.42617	0.0325	downregulated	5	0.877615	0.4158	upregulated	6	4.12773	0.0161	upregulated	11	5.10543	0.0061	upregulated	6	1.8217	0.1617
complement activation	GO	5 out of 8	11.7531	downregulated	3	2.1927	0.1116					downregulated	3	1.04207	0.3527	downregulated	3	6.21647	0.002	downregulated	1	0.081211	0.922	upregulated	3	0.769568	0.4632	upregulated	3	2.09891	0.1226	downregulated	3	0.485348	0.6155
cell-matrix adhesion	GO	6 out of 8	11.7522	upregulated	4	1.03948	0.3536	upregulated	3	1.4364	0.2378	downregulated	10	2.61417	0.0732	downregulated	7	7.09324	0.0008	upregulated	2	0.87165	0.4183	upregulated	8	1.24057	0.2892	upregulated	12	1.16786	0.311	upregulated	9	1.24057	0.2892
anatomical structure regression	GO	4 out of 8	11.735					upregulated	1	1.56136	0.2099									upregulated	1	2.50708	0.0815	upregulated	2	3.47926	0.0308	upregulated	2	3.38785	0.0338	upregulated	2	3.92216	0.0198
centriole assembly	GO	7 out of 8	11.7301					downregulated	1	2.50737	0.0815	downregulated	5	3.3547	0.0349	downregulated	2	1.44757	0.2351	upregulated	1	2.53125	0.0796	upregulated	1	1.13753	0.3206	upregulated	1	0.539235	0.5832	upregulated	1	0.212424	0.8086
regulation of establishment of cell polarity	GO	5 out of 8	11.716	downregulated	1	1.43542	0.238					downregulated	3	1.7314	0.177									upregulated	3	3.29897	0.0369	upregulated	3	3.08963	0.0455	upregulated	4	2.16062	0.1153
serine-type peptidase activity	GO	5 out of 8	11.6656	downregulated	10	4.65587	0.0095	downregulated	2	1.91596	0.1472	upregulated	4	3.52628	0.0294	downregulated	9	7.88437	0.0004	downregulated	1	0.205858	0.8139	upregulated	6	0.248713	0.7798	upregulated	6	1.30025	0.2725	downregulated	4	0.607467	0.5447
regulation of binding	GO	7 out of 8	11.6441	downregulated	8	2.02254	0.1323	downregulated	5	3.61193	0.027	downregulated	21	1.48397	0.2267	upregulated	7	3.32468	0.036	upregulated	8	2.02617	0.1318	upregulated	33	2.19624	0.1112	upregulated	37	2.20683	0.11	upregulated	34	1.42109	0.2415
regulation of lipid metabolic process	GO	5 out of 8	11.6363	upregulated	10	0.879545	0.415	upregulated	17	4.51156	0.011	downregulated	26	4.38899	0.0124	downregulated	21	8.90836	0.0001	downregulated	13	1.75098	0.1736	upregulated	19	1.79258	0.1665	upregulated	21	2.43862	0.0873	upregulated	23	1.24983	0.2866
detection of abiotic stimulus	GO	4 out of 8	11.6326	upregulated	4	3.19564	0.0409	downregulated	3	2.92027	0.0539	downregulated	8	4.75006	0.0087	downregulated	8	8.12871	0.0003	downregulated	4	1.99836	0.1356	downregulated	8	1.54476	0.2134	downregulated	6	1.48395	0.2267	upregulated	3	4.05624	0.0173
transferase activity, transferring acyl groups	GO	6 out of 8	11.6278	upregulated	11	0.750617	0.4721	upregulated	13	3.21039	0.0403	downregulated	15	3.19771	0.0409	downregulated	9	1.47915	0.2278	upregulated	3	0.431899	0.6493	upregulated	26	2.39673	0.091	upregulated	25	2.27752	0.1025	upregulated	28	5.8058	0.003
cerebellar Purkinje cell layer formation	GO	5 out of 8	11.6217									downregulated	2	2.80367	0.0606					upregulated	1	2.2674	0.1036	upregulated	1	1.7002	0.1826	upregulated	1	1.76311	0.1715	upregulated	1	3.0873	0.0456
carbohydrate binding	GO	6 out of 8	11.6149	downregulated	6	1.54606	0.2131	upregulated	10	2.04918	0.1288	downregulated	17	5.92209	0.0027	downregulated	11	4.4052	0.0122	upregulated	2	0.453805	0.6352	upregulated	11	0.913887	0.401	upregulated	8	0.810113	0.4448	downregulated	9	0.387055	0.6791
cell fate determination	GO	4 out of 8	11.5726	upregulated	3	3.97669	0.0187	downregulated	1	3.91402	0.02	downregulated	6	4.07647	0.017	downregulated	1	3.06735	0.0465	upregulated	3	3.1197	0.0442	upregulated	4	3.55635	0.0285	upregulated	4	1.69889	0.1829	upregulated	2	3.19763	0.0409
cytoplasmic region	GO	5 out of 8	11.5468	upregulated	32	4.51318	0.011	downregulated	9	2.8379	0.0585	downregulated	41	8.44985	0.0002	downregulated	26	7.46123	0.0006	downregulated	23	4.34924	0.0129	downregulated	43	6.88265	0.001	upregulated	67	5.57327	0.0038	upregulated	47	2.96962	0.0513
endothelial cell differentiation	GO	6 out of 8	11.5429	downregulated	5	4.6546	0.0095	upregulated	5	3.0059	0.0495	downregulated	9	4.06683	0.0171	downregulated	4	1.9275	0.1455	upregulated	2	1.85289	0.1568	upregulated	9	2.14743	0.1168	upregulated	9	1.22014	0.2952	downregulated	7	1.32057	0.267
response to nutrient	GO	7 out of 8	11.537	downregulated	5	3.50998	0.0299	upregulated	11	7.68516	0.0005	downregulated	16	3.05932	0.0469	downregulated	16	9.78243	5.6e-05	upregulated	1	0.884933	0.4127	upregulated	8	0.707552	0.4928	upregulated	8	0.813729	0.4432	upregulated	9	0.464222	0.6286
NADP binding	GO	3 out of 8	11.5181	downregulated	2	1.66225	0.1897	upregulated	3	2.43311	0.0878	downregulated	9	7.21059	0.0007	downregulated	7	8.94281	0.0001	downregulated	1	0.399999	0.6703	downregulated	1	0.920009	0.3985	downregulated	3	1.45613	0.2331	downregulated	2	1.08832	0.3368
serine hydrolase activity	GO	5 out of 8	11.5009	downregulated	10	4.54099	0.0107	downregulated	2	1.89693	0.15	upregulated	4	3.47416	0.031	downregulated	10	7.80692	0.0004	downregulated	1	0.197221	0.821	upregulated	6	0.239099	0.7873	upregulated	6	1.28097	0.2778	downregulated	4	0.592585	0.5529
response to fungus	GO	5 out of 8	11.4878	upregulated	1	0.459693	0.6315	upregulated	2	2.84324	0.0582	downregulated	6	7.11469	0.0008	downregulated	3	5.16714	0.0057	upregulated	1	1.63584	0.1948	upregulated	3	1.48987	0.2254	upregulated	1	0.26049	0.7707	downregulated	1	0.877256	0.4159
spindle pole	GO	4 out of 8	11.4733	upregulated	11	3.43908	0.0321	upregulated	15	9.64474	6.5e-05	downregulated	11	1.522	0.2183	upregulated	1	1.225	0.2938	upregulated	3	1.79935	0.1654	upregulated	18	2.97601	0.051	upregulated	21	4.367	0.0127	upregulated	15	2.33091	0.0972
regulation of epithelial cell proliferation	GO	6 out of 8	11.4556	downregulated	11	2.91546	0.0542	upregulated	17	4.59905	0.0101	upregulated	15	4.35773	0.0128	downregulated	15	3.50266	0.0301	upregulated	7	2.94115	0.0528	upregulated	28	4.54522	0.0106	upregulated	35	3.67127	0.0254	upregulated	21	2.8366	0.0586
digestive tract morphogenesis	GO	8 out of 8	11.3807	downregulated	3	1.82866	0.1606	downregulated	1	1.26483	0.2823	downregulated	2	0.992382	0.3707	downregulated	1	0.228304	0.7959	upregulated	2	1.90302	0.1491	upregulated	5	1.42635	0.2402	upregulated	8	1.93128	0.145	upregulated	5	1.80585	0.1643
positive regulation of stem cell differentiation	GO	4 out of 8	11.3377	upregulated	2	2.68547	0.0682	upregulated	1	0.600322	0.5486	upregulated	1	0.947414	0.3877					upregulated	2	2.85857	0.0574	upregulated	4	4.28893	0.0137	upregulated	3	3.3884	0.0338	upregulated	4	5.03504	0.0065
response to toxic substance	GO	3 out of 8	11.3367	downregulated	12	2.83158	0.0589	upregulated	17	3.90723	0.0201	downregulated	33	8.27242	0.0003	downregulated	24	7.17831	0.0008	downregulated	10	1.57358	0.2073	downregulated	21	0.877488	0.4158	downregulated	20	0.332436	0.7172	downregulated	19	0.254866	0.775
positive regulation of organelle assembly	GO	6 out of 8	11.3319	upregulated	3	2.39988	0.0907	upregulated	5	1.78004	0.1686	downregulated	6	1.81416	0.163	downregulated	6	3.47972	0.0308	upregulated	3	1.60761	0.2004	upregulated	10	3.0355	0.0481	upregulated	11	4.13227	0.016	upregulated	7	1.44251	0.2363
protein activation cascade	GO	6 out of 8	11.2824	downregulated	3	1.66018	0.1901	downregulated	1	0.470476	0.6247	downregulated	4	1.38377	0.2506	downregulated	3	5.61763	0.0036	downregulated	1	0.0384677	0.9623	upregulated	3	0.597247	0.5503	upregulated	4	1.86659	0.1546	downregulated	3	0.275014	0.7596
regulation of apoptotic signaling pathway	GO	7 out of 8	11.261	downregulated	7	0.545847	0.5794	upregulated	17	7.83651	0.0004	downregulated	27	4.00227	0.0183	downregulated	23	6.38055	0.0017	upregulated	7	2.35016	0.0954	upregulated	22	2.52045	0.0804	upregulated	30	1.44853	0.2349	upregulated	18	1.84966	0.1573
negative regulation of CD4-positive, alpha-beta T cell activation	GO	5 out of 8	11.2091									downregulated	2	0.646463	0.5239					upregulated	1	0.905399	0.4044	upregulated	4	2.64145	0.0713	upregulated	5	4.63567	0.0097	upregulated	3	2.3801	0.0925
dorsal/ventral axis specification	GO	4 out of 8	11.144									upregulated	1	1.17392	0.3092					upregulated	1	3.03658	0.048	upregulated	3	2.76585	0.0629	upregulated	3	2.32883	0.0974	upregulated	2	4.18663	0.0152
basal plasma membrane	GO	6 out of 8	11.1439	downregulated	1	0.799626	0.4495	upregulated	2	6.09359	0.0023	downregulated	6	9.00995	0.0001	downregulated	4	4.81244	0.0081	upregulated	2	2.83928	0.0585	downregulated	4	3.10636	0.0448	upregulated	4	1.2303	0.2922	upregulated	2	1.65228	0.1916
positive regulation of fatty acid transport	GO	4 out of 8	11.1414									downregulated	1	3.11999	0.0442	downregulated	1	2.4485	0.0864	upregulated	1	3.44355	0.032	upregulated	1	2.52032	0.0804	downregulated	1	0.390913	0.6764
apoptotic signaling pathway	GO	5 out of 8	11.1034	downregulated	9	2.98238	0.0507	upregulated	7	6.80679	0.0011	downregulated	20	4.68601	0.0092	downregulated	14	3.56253	0.0284	upregulated	7	6.5126	0.0015	upregulated	19	3.0317	0.0482	downregulated	12	1.44196	0.2365	downregulated	17	1.42306	0.241
cell projection membrane	GO	5 out of 8	11.0324	downregulated	11	4.98013	0.0069	downregulated	7	1.10533	0.3311	downregulated	31	6.54669	0.0014	downregulated	16	4.18763	0.0152	downregulated	16	1.75035	0.1737	downregulated	25	4.13329	0.016	upregulated	25	3.40953	0.0331	upregulated	21	3.23343	0.0394
core promoter sequence-specific DNA binding	GO	5 out of 8	11.0264	upregulated	1	0.234643	0.7909	upregulated	1	0.40667	0.6659	upregulated	2	2.56339	0.077	downregulated	3	1.96228	0.1405	upregulated	3	3.35931	0.0348	upregulated	5	2.6503	0.0706	upregulated	6	2.88654	0.0558	upregulated	5	3.37267	0.0343
developmental growth	GO	5 out of 8	10.9696	downregulated	13	2.11098	0.1211	upregulated	8	3.37029	0.0344	upregulated	15	6.06004	0.0023	upregulated	6	4.34663	0.013	upregulated	13	6.58118	0.0014	upregulated	34	7.8737	0.0004	upregulated	38	5.72079	0.0033	upregulated	30	2.45987	0.0854
cellular detoxification	GO	7 out of 8	10.9613	downregulated	2	1.04714	0.3509	upregulated	6	4.03915	0.0176	downregulated	5	6.36993	0.0017	downregulated	3	3.44958	0.0318	upregulated	1	1.86362	0.1551	upregulated	2	0.884713	0.4128	upregulated	3	0.529466	0.5889	upregulated	6	0.855987	0.4249
hydrolase activity, hydrolyzing N-glycosyl compounds	GO	5 out of 8	10.9548					upregulated	1	1.56838	0.2084	downregulated	2	3.05445	0.0471	downregulated	3	3.96367	0.019	upregulated	1	1.79102	0.1668	upregulated	1	1.99859	0.1355	upregulated	1	1.71544	0.1799
regulation of G1/S transition of mitotic cell cycle	GO	7 out of 8	10.9203	downregulated	3	0.292559	0.7464	upregulated	6	2.27735	0.1026	downregulated	16	5.46687	0.0042	downregulated	11	4.13568	0.016	upregulated	2	0.191003	0.8261	upregulated	13	0.468668	0.6258	upregulated	15	0.704912	0.4942	upregulated	15	1.938	0.144
positive regulation of apoptotic signaling pathway	GO	6 out of 8	10.9195	downregulated	6	1.6199	0.1979	upregulated	8	5.99558	0.0025	downregulated	17	5.67735	0.0034	downregulated	12	3.25941	0.0384	upregulated	4	3.3496	0.0351	upregulated	11	1.61956	0.198	upregulated	15	1.56101	0.2099	upregulated	9	1.44776	0.2351
mesoderm morphogenesis	GO	6 out of 8	10.9102	downregulated	3	2.14931	0.1166	upregulated	1	0.325663	0.722	downregulated	4	4.28155	0.0138	downregulated	2	2.46115	0.0853	downregulated	1	0.326826	0.7212	upregulated	6	1.14296	0.3189	upregulated	7	0.557166	0.5728	upregulated	5	0.970512	0.3789
multivesicular body sorting pathway	GO	5 out of 8	10.8781	upregulated	2	3.2247	0.0398	upregulated	3	1.98989	0.1367	upregulated	2	1.50967	0.221	downregulated	1	0.337941	0.7132	upregulated	1	5.04697	0.0064	upregulated	5	3.73394	0.0239	upregulated	7	4.82462	0.008	upregulated	5	3.65891	0.0258
cyclin-dependent protein kinase activity	GO	6 out of 8	10.8781	upregulated	4	1.72472	0.1782	downregulated	3	5.55838	0.0039	downregulated	4	3.02085	0.0488	downregulated	1	0.388608	0.678	upregulated	2	1.83354	0.1598	upregulated	4	1.52672	0.2172	upregulated	5	1.29242	0.2746	downregulated	2	1.01771	0.3614
cellular response to peptide	GO	6 out of 8	10.8696	downregulated	7	3.53761	0.0291	upregulated	12	6.92718	0.001	downregulated	20	4.12628	0.0161	downregulated	16	3.56048	0.0284	downregulated	10	1.72379	0.1784	upregulated	26	2.28506	0.1018	upregulated	27	4.87088	0.0077	upregulated	21	1.14025	0.3197
positive regulation of secretion	GO	5 out of 8	10.8662	downregulated	7	1.09213	0.3355	upregulated	17	4.2738	0.0139	downregulated	24	6.36961	0.0017	downregulated	19	12.2123	5e-06	upregulated	8	2.59886	0.0744	downregulated	29	3.8964	0.0203	upregulated	27	2.38523	0.0921	downregulated	22	5.62178	0.0036
intestinal lipid absorption	GO	3 out of 8	10.7631									downregulated	1	0.846421	0.4289	downregulated	2	4.13516	0.016									upregulated	1	5.78153	0.0031
extracellular matrix binding	GO	3 out of 8	10.7557	downregulated	1	2.83852	0.0585	upregulated	1	3.17471	0.0418	downregulated	5	7.30855	0.0007	downregulated	5	6.12535	0.0022	downregulated	2	1.1611	0.3131	downregulated	3	1.01029	0.3641	downregulated	2	0.170659	0.8431
negative regulation of apoptotic signaling pathway	GO	6 out of 8	10.7423	upregulated	12	0.977224	0.3764	upregulated	11	7.74175	0.0004	downregulated	12	4.07319	0.017	downregulated	14	8.4324	0.0002	upregulated	4	1.94549	0.1429	upregulated	12	2.01911	0.1328	upregulated	16	2.11308	0.1209	upregulated	10	0.87804	0.4156
positive regulation of supramolecular fiber organization	GO	5 out of 8	10.7398	upregulated	6	1.69848	0.183	upregulated	6	2.40238	0.0905	downregulated	20	7.45792	0.0006	downregulated	9	5.21244	0.0054	upregulated	3	1.35426	0.2581	downregulated	13	3.1975	0.0409	upregulated	16	2.42992	0.088	upregulated	10	1.58365	0.2052
carbohydrate derivative catabolic process	GO	5 out of 8	10.709	downregulated	4	0.851337	0.4268	upregulated	9	2.70049	0.0672	upregulated	4	1.26827	0.2813	downregulated	10	6.67535	0.0013	upregulated	3	2.34372	0.096	upregulated	7	3.10359	0.0449	downregulated	12	2.8763	0.0563	upregulated	10	4.58007	0.0103
intestinal absorption	GO	4 out of 8	10.6996					upregulated	1	0.644161	0.5251	downregulated	2	0.442774	0.6423	downregulated	3	4.23429	0.0145					upregulated	2	2.05922	0.1276	upregulated	3	4.68549	0.0092	downregulated	1	0.0780121	0.925
positive regulation of CD4-positive, alpha-beta T cell activation	GO	5 out of 8	10.6959	downregulated	1	0.76584	0.4649					downregulated	5	4.87139	0.0077	downregulated	2	3.36333	0.0346					upregulated	1	0.191085	0.8261	upregulated	1	1.50422	0.2222
ovulation cycle	GO	4 out of 8	10.6726	upregulated	3	1.62692	0.1965	upregulated	2	2.15577	0.1158	upregulated	2	3.40016	0.0334	upregulated	1	3.65346	0.0259	upregulated	4	4.6203	0.0098	upregulated	5	4.95736	0.007	upregulated	10	3.94079	0.0194	upregulated	7	7.99045	0.0003
endolysosome	GO	2 out of 8	10.6371					upregulated	1	3.38957	0.0337	downregulated	2	2.76842	0.0628	downregulated	6	14.5264	4.9e-07					downregulated	2	0.679455	0.5069	downregulated	2	1.26313	0.2828	downregulated	2	1.32554	0.2657
nucleosome	GO	4 out of 8	10.6358	upregulated	3	1.1803	0.3072	upregulated	5	4.85389	0.0078	downregulated	1	0.075832	0.927	downregulated	2	0.911185	0.402	upregulated	1	1.69017	0.1845	upregulated	5	1.76992	0.1703	upregulated	9	5.26016	0.0052	upregulated	6	1.91559	0.1473
phosphotransferase activity, phosphate group as acceptor	GO	5 out of 8	10.6352	upregulated	3	3.17125	0.042					downregulated	3	2.23459	0.107	downregulated	1	1.74539	0.1746	downregulated	1	1.01865	0.3611	upregulated	6	3.61926	0.0268	upregulated	5	3.50934	0.0299	upregulated	4	3.71648	0.0243
oxidoreductase activity, acting on paired donors, with incorporation or reduction of molecular oxygen, NAD(P)H as one donor, and incorporation of one atom of oxygen	GO	3 out of 8	10.6127	upregulated	1	0.514255	0.5979	downregulated	2	6.23956	0.002	downregulated	5	5.08079	0.0062	downregulated	3	4.64852	0.0096	downregulated	1	0.686887	0.5031	downregulated	1	1.13817	0.3204	downregulated	1	1.70017	0.1827	downregulated	1	1.31664	0.268
determination of heart left/right asymmetry	GO	7 out of 8	10.607	upregulated	7	5.76321	0.0031	downregulated	2	3.0437	0.0477	downregulated	3	3.39102	0.0337	downregulated	2	1.25902	0.2839	upregulated	3	2.63488	0.0717	upregulated	5	2.65456	0.0703	upregulated	5	1.84422	0.1581	upregulated	3	1.54281	0.2138
viral life cycle	GO	6 out of 8	10.6016	upregulated	7	1.50499	0.222	upregulated	9	2.94383	0.0527	downregulated	13	5.09572	0.0061	downregulated	11	5.91476	0.0027	upregulated	2	2.13858	0.1178	upregulated	10	0.744637	0.4749	upregulated	15	0.624736	0.5354	upregulated	9	0.53201	0.5874
regulation of Wnt signaling pathway, planar cell polarity pathway	GO	5 out of 8	10.5987	upregulated	1	2.14805	0.1167					downregulated	1	0.776888	0.4598					upregulated	1	1.5615	0.2098	upregulated	2	4.92393	0.0073	upregulated	2	3.42006	0.0327	upregulated	1	2.06435	0.1269
intrinsic apoptotic signaling pathway by p53 class mediator	GO	6 out of 8	10.5872	downregulated	1	2.47374	0.0843	downregulated	1	0.886383	0.4121	upregulated	1	2.8815	0.0561	downregulated	2	1.06603	0.3444	upregulated	2	5.14206	0.0058	upregulated	3	2.15082	0.1164	upregulated	8	2.72477	0.0656	downregulated	2	0.975051	0.3772
endodermal cell differentiation	GO	6 out of 8	10.5608	upregulated	1	1.58513	0.2049					downregulated	1	2.09144	0.1235	downregulated	2	3.8008	0.0224	upregulated	1	0.995548	0.3695	upregulated	3	2.30545	0.0997	upregulated	2	2.0651	0.1268	upregulated	2	0.88757	0.4117
IRES-dependent viral translational initiation	GO	4 out of 8	10.5292									downregulated	3	4.77413	0.0084	downregulated	2	5.08038	0.0062					upregulated	2	0.738111	0.478	upregulated	1	0.340348	0.7115	downregulated	1	0.403743	0.6678
regulation of cell cycle G1/S phase transition	GO	7 out of 8	10.5282	downregulated	3	0.245004	0.7827	upregulated	6	2.0868	0.1241	downregulated	16	4.82065	0.0081	downregulated	12	4.27031	0.014	upregulated	2	0.169071	0.8444	upregulated	14	0.496051	0.6089	upregulated	17	0.706934	0.4932	upregulated	16	1.90696	0.1485
regulation of cell fate specification	GO	5 out of 8	10.5276	downregulated	1	1.93909	0.1438	downregulated	1	2.16772	0.1144													upregulated	2	2.53452	0.0793	upregulated	3	3.13778	0.0434	upregulated	1	0.748543	0.4731
interleukin-12-mediated signaling pathway	GO	5 out of 8	10.5238	upregulated	3	2.32264	0.098	downregulated	1	3.69316	0.0249	downregulated	7	3.15215	0.0428	downregulated	4	4.6157	0.0099					upregulated	1	0.821035	0.44	upregulated	2	0.787662	0.4549	downregulated	1	0.223295	0.7999
azurophil granule membrane	GO	3 out of 8	10.522	upregulated	1	1.47773	0.2282	upregulated	5	4.32016	0.0133	downregulated	6	4.85709	0.0078	downregulated	8	10.6852	2.3e-05	upregulated	1	0.777624	0.4595	downregulated	3	1.20903	0.2985	downregulated	6	2.35605	0.0948	downregulated	4	1.01234	0.3634
oxidoreductase activity, acting on the CH-CH group of donors, NAD or NADP as acceptor	GO	4 out of 8	10.476	downregulated	1	1.783	0.1681	upregulated	1	2.63523	0.0717	downregulated	2	1.06826	0.3436	downregulated	4	8.44728	0.0002	downregulated	1	1.42662	0.2401	downregulated	2	1.1802	0.3072	upregulated	1	1.16053	0.3133	upregulated	2	3.23935	0.0392
organelle outer membrane	GO	5 out of 8	10.4385	downregulated	4	0.886853	0.4119	upregulated	8	2.93377	0.0532	downregulated	16	8.0619	0.0003	downregulated	10	4.41283	0.0121	downregulated	10	3.49786	0.0303	upregulated	13	2.98784	0.0504	upregulated	17	2.45186	0.0861	upregulated	12	1.05671	0.3476
carboxylic acid transport	GO	5 out of 8	10.4247	upregulated	11	3.4048	0.0332	upregulated	7	1.3178	0.2677	upregulated	10	7.81942	0.0004	downregulated	9	2.72607	0.0655	upregulated	7	3.84538	0.0214	upregulated	15	4.62529	0.0098	upregulated	18	5.52087	0.004	upregulated	15	6.24908	0.0019
organic acid transport	GO	5 out of 8	10.4247	upregulated	11	3.4048	0.0332	upregulated	7	1.3178	0.2677	upregulated	10	7.81942	0.0004	downregulated	9	2.72607	0.0655	upregulated	7	3.84538	0.0214	upregulated	15	4.62529	0.0098	upregulated	18	5.52087	0.004	upregulated	15	6.24908	0.0019
protein localization to cytoskeleton	GO	6 out of 8	10.3604	upregulated	4	3.11437	0.0444	upregulated	1	0.300507	0.7404	downregulated	5	4.27759	0.0139	downregulated	2	1.46004	0.2322	upregulated	2	3.55607	0.0286	upregulated	5	2.22309	0.1083	upregulated	5	1.72084	0.1789	upregulated	4	0.53763	0.5841
positive regulation of blood pressure	GO	5 out of 8	10.3413					downregulated	1	1.91331	0.1476	upregulated	2	1.73169	0.177	upregulated	1	1.84433	0.1581	upregulated	1	2.38746	0.0919	upregulated	2	2.67635	0.0688	upregulated	3	3.24057	0.0391	upregulated	2	3.69965	0.0247
cell-substrate adhesion	GO	6 out of 8	10.3144	upregulated	5	1.46936	0.2301	upregulated	4	2.54803	0.0782	downregulated	13	1.93415	0.1445	downregulated	10	7.5313	0.0005	upregulated	2	0.539325	0.5831	upregulated	10	0.984198	0.3737	upregulated	15	1.60338	0.2012	upregulated	13	1.73946	0.1756
ER to Golgi vesicle-mediated transport	GO	6 out of 8	10.3067	downregulated	5	1.88174	0.1523	upregulated	10	1.57209	0.2076	downregulated	14	1.59868	0.2022	upregulated	1	1.17355	0.3093	upregulated	3	3.73927	0.0238	upregulated	16	1.39774	0.2472	upregulated	19	0.821577	0.4397	upregulated	17	3.61336	0.027
cytolysis	GO	4 out of 8	10.2978									downregulated	2	2.84847	0.0579	downregulated	1	2.2474	0.1057	upregulated	1	3.03365	0.0481	upregulated	1	2.16833	0.1144
negative regulation of cell cycle G2/M phase transition	GO	6 out of 8	10.2964	upregulated	3	0.388194	0.6783	upregulated	4	1.49962	0.2232	downregulated	7	5.41907	0.0044	downregulated	6	4.58284	0.0102	upregulated	1	0.331075	0.7182	upregulated	4	0.862228	0.4222	upregulated	3	0.371388	0.6898	upregulated	3	0.617613	0.5392
exopeptidase activity	GO	5 out of 8	10.2927	upregulated	2	1.00849	0.3648	upregulated	5	1.10796	0.3302	downregulated	9	3.55764	0.0285	downregulated	8	5.81893	0.003	upregulated	3	1.37783	0.2521	upregulated	9	2.30533	0.0997	upregulated	8	1.39316	0.2483	downregulated	7	2.0437	0.1295
cell volume homeostasis	GO	5 out of 8	10.2438	downregulated	1	1.88014	0.1526					downregulated	3	3.51437	0.0298	downregulated	3	3.31239	0.0364	upregulated	2	2.71739	0.066	upregulated	3	3.5783	0.0279	downregulated	3	2.84736	0.058	downregulated	4	1.91146	0.1479
cofactor transport	GO	6 out of 8	10.2327	upregulated	3	1.42741	0.2399	downregulated	1	0.5894	0.5547	downregulated	4	5.17109	0.0057	downregulated	1	1.38445	0.2505	upregulated	1	2.34416	0.0959	upregulated	3	2.33455	0.0969	upregulated	1	0.436064	0.6466	downregulated	2	0.599591	0.549
sequestering of metal ion	GO	3 out of 8	10.2274									downregulated	2	8.48542	0.0002													upregulated	1	0.802764	0.4481	upregulated	1	0.939178	0.3909
positive regulation of ATP biosynthetic process	GO	6 out of 8	10.2102	upregulated	2	3.18315	0.0415					downregulated	4	3.60539	0.0272	downregulated	2	2.50913	0.0813	upregulated	1	2.57101	0.0765	upregulated	2	1.68377	0.1857	upregulated	3	1.00997	0.3642	upregulated	4	2.01403	0.1334
defense response to fungus	GO	4 out of 8	10.2006					upregulated	1	0.748987	0.4728	downregulated	3	6.84681	0.0011	downregulated	1	1.40128	0.2463	upregulated	1	2.00652	0.1345	upregulated	1	1.85452	0.1565					downregulated	1	1.15959	0.3136
spliceosomal complex	GO	3 out of 8	10.1393	upregulated	11	2.255	0.1049	upregulated	15	7.57245	0.0005	upregulated	5	2.24813	0.1056	downregulated	7	1.05876	0.3469	upregulated	1	0.179093	0.836	upregulated	15	1.15917	0.3137	upregulated	26	4.56922	0.0104	upregulated	24	4.41095	0.0121
cellular response to leukemia inhibitory factor	GO	5 out of 8	10.1373	upregulated	8	2.29851	0.1004	upregulated	6	1.82561	0.1611	downregulated	10	5.98978	0.0025	downregulated	8	4.8961	0.0075	upregulated	2	1.2149	0.2967	upregulated	9	1.48604	0.2263	downregulated	5	1.59066	0.2038	upregulated	8	2.26525	0.1038
G1 DNA damage checkpoint	GO	6 out of 8	10.1352	upregulated	4	0.577552	0.5613	upregulated	4	3.45255	0.0317	downregulated	9	5.96218	0.0026	downregulated	5	2.61123	0.0734	upregulated	2	0.726469	0.4836	upregulated	8	1.87416	0.1535	upregulated	11	2.02761	0.1316	upregulated	7	0.963657	0.3815
digestive tract development	GO	6 out of 8	10.1347	downregulated	5	2.40535	0.0902	upregulated	3	4.65388	0.0095	downregulated	9	1.70586	0.1816	upregulated	1	1.18588	0.3055	upregulated	5	3.00408	0.0496	upregulated	10	3.84486	0.0214	upregulated	14	1.86668	0.1546	upregulated	9	3.14768	0.043
protein binding involved in heterotypic cell-cell adhesion	GO	2 out of 8	10.1257									downregulated	3	7.1672	0.0008	downregulated	1	2.9585	0.0519
cellular response to thyroid hormone stimulus	GO	3 out of 8	10.0788					upregulated	1	2.15853	0.1155	downregulated	1	2.90874	0.0545	downregulated	2	4.90414	0.0074					downregulated	1	0.269388	0.7638	upregulated	3	2.53532	0.0792
regulation of transcription regulatory region DNA binding	GO	7 out of 8	10.076	downregulated	1	0.806199	0.4466	upregulated	2	2.65005	0.0706	downregulated	3	3.50452	0.0301	downregulated	4	2.96549	0.0515	upregulated	2	1.62643	0.1966	upregulated	4	2.01737	0.133	upregulated	5	1.18385	0.3061	upregulated	4	0.622179	0.5368
positive regulation of protein localization to nucleus	GO	7 out of 8	9.99589	downregulated	2	1.11171	0.329	upregulated	1	0.0656498	0.9365	downregulated	4	1.0627	0.3455	downregulated	3	0.755997	0.4695	upregulated	3	2.58406	0.0755	upregulated	7	1.53861	0.2147	upregulated	7	1.49377	0.2245	upregulated	5	1.51469	0.2199
TORC1 signaling	GO	5 out of 8	9.95351	downregulated	1	1.44336	0.2361					downregulated	1	1.88815	0.1514	downregulated	1	1.22357	0.2942					upregulated	2	2.49888	0.0822	upregulated	2	2.89955	0.055	upregulated	2	2.52713	0.0799
regulation of I-kappaB kinase/NF-kappaB signaling	GO	6 out of 8	9.94521	downregulated	5	0.415649	0.6599	upregulated	11	6.47006	0.0015	downregulated	17	4.89998	0.0074	downregulated	13	3.03489	0.0481	upregulated	6	3.68522	0.0251	upregulated	16	2.54217	0.0787	upregulated	19	2.69846	0.0673	upregulated	15	1.68108	0.1862
single-stranded RNA binding	GO	4 out of 8	9.9449	upregulated	5	0.790568	0.4536	upregulated	10	7.72768	0.0004	downregulated	14	4.5779	0.0103	downregulated	6	2.25029	0.1054	upregulated	3	2.33106	0.0972	upregulated	11	3.00885	0.0493	upregulated	13	2.67568	0.0689	upregulated	7	1.92931	0.1452
organelle transport along microtubule	GO	5 out of 8	9.93554	downregulated	2	2.68223	0.0684	downregulated	2	3.27522	0.0378	downregulated	5	1.93702	0.1441	downregulated	1	1.24792	0.2871	downregulated	3	1.45151	0.2342	upregulated	8	2.98272	0.0507	upregulated	9	1.94416	0.1431	upregulated	5	1.62693	0.1965
regulation of phosphorylation of RNA polymerase II C-terminal domain	GO	4 out of 8	9.90746																	upregulated	1	1.63009	0.1959	upregulated	2	1.93075	0.145	upregulated	4	4.3353	0.0131	upregulated	1	2.01132	0.1338
regulation of telomere maintenance via telomere lengthening	GO	6 out of 8	9.88185	upregulated	5	3.01877	0.0489	downregulated	1	3.15746	0.0425	downregulated	4	2.33061	0.0972	downregulated	4	3.43741	0.0321	downregulated	1	0.196629	0.8215	upregulated	5	2.32301	0.098	upregulated	8	1.25727	0.2844	upregulated	6	0.591489	0.5535
lysosomal transport	GO	4 out of 8	9.88106	upregulated	7	3.66588	0.0256	upregulated	6	2.19684	0.1112	upregulated	5	3.89314	0.0204	downregulated	7	5.07146	0.0063	downregulated	4	1.74882	0.174	upregulated	12	3.26239	0.0383	upregulated	18	5.02442	0.0066	upregulated	11	2.61277	0.0733
extrinsic apoptotic signaling pathway in absence of ligand	GO	4 out of 8	9.82605	downregulated	2	1.61251	0.1994					downregulated	2	5.79806	0.003	downregulated	1	0.319393	0.7266	upregulated	2	4.94466	0.0071	downregulated	2	1.84931	0.1573	downregulated	2	1.5556	0.2111	downregulated	3	1.29298	0.2745
cytokine biosynthetic process	GO	4 out of 8	9.81237									downregulated	1	0.955055	0.3848									upregulated	1	3.22024	0.0399	upregulated	1	3.02938	0.0483	upregulated	1	2.60769	0.0737
muscle organ development	GO	6 out of 8	9.80383	upregulated	14	4.91526	0.0073	upregulated	8	1.74608	0.1745	downregulated	24	4.7271	0.0089	downregulated	11	1.94029	0.1437	upregulated	9	2.95272	0.0522	upregulated	24	2.3252	0.0978	upregulated	26	1.62798	0.1963	upregulated	19	1.1458	0.318
positive regulation of intrinsic apoptotic signaling pathway	GO	5 out of 8	9.80259	downregulated	3	1.88933	0.1512	upregulated	2	2.15031	0.1164	downregulated	7	8.18974	0.0003	downregulated	2	0.626499	0.5345	upregulated	2	1.80759	0.164	downregulated	3	0.532155	0.5873	upregulated	5	0.605435	0.5458	downregulated	5	0.63354	0.5307
cell aggregation	GO	6 out of 8	9.79448	downregulated	1	1.15639	0.3146	upregulated	1	2.90243	0.0549	downregulated	1	0.2196	0.8028					upregulated	1	2.72043	0.0658	upregulated	1	2.88795	0.0557	upregulated	1	2.33875	0.0964	upregulated	1	3.37379	0.0343
regulation of intrinsic apoptotic signaling pathway	GO	6 out of 8	9.79055	upregulated	10	1.09282	0.3353	upregulated	5	3.0187	0.0489	downregulated	12	5.94629	0.0026	downregulated	9	5.11221	0.006	upregulated	2	0.96229	0.382	upregulated	9	0.609446	0.5437	upregulated	10	1.04401	0.352	upregulated	9	0.227819	0.7963
sterol binding	GO	6 out of 8	9.7898	downregulated	1	0.616447	0.5399	upregulated	5	4.89588	0.0075	downregulated	4	1.76015	0.172	downregulated	4	6.27906	0.0019	downregulated	2	2.01571	0.1332	upregulated	3	2.55683	0.0776	upregulated	3	1.48704	0.226	upregulated	3	4.00186	0.0183
response to peptide hormone	GO	7 out of 8	9.78741	downregulated	9	3.39896	0.0334	upregulated	14	7.93469	0.0004	downregulated	22	2.82545	0.0593	downregulated	15	3.4861	0.0306	upregulated	6	0.644068	0.5252	upregulated	33	3.91633	0.0199	upregulated	33	2.51971	0.0805	upregulated	26	0.931481	0.394
bone growth	GO	6 out of 8	9.7669	downregulated	3	2.37576	0.0929					downregulated	3	2.5087	0.0814	upregulated	1	1.99905	0.1355	upregulated	1	1.10879	0.33	upregulated	3	2.67454	0.0689	upregulated	3	2.57347	0.0763	upregulated	3	0.524692	0.5917
regulation of endoplasmic reticulum stress-induced intrinsic apoptotic signaling pathway	GO	6 out of 8	9.74517	upregulated	1	0.542784	0.5811	downregulated	2	2.2942	0.1008	downregulated	1	2.76842	0.0628					upregulated	1	2.54171	0.0787	upregulated	2	0.981557	0.3747	upregulated	3	0.806534	0.4464	upregulated	3	0.895539	0.4084
response to osmotic stress	GO	3 out of 8	9.7431	upregulated	3	1.29216	0.2747	upregulated	1	2.24803	0.1056	downregulated	7	6.57263	0.0014	downregulated	10	8.819	0.0001	downregulated	3	1.46004	0.2322	downregulated	3	3.48067	0.0308	downregulated	4	2.83176	0.0589	upregulated	5	5.66412	0.0035
regulation of vasoconstriction	GO	4 out of 8	9.73654	downregulated	1	3.55729	0.0285	upregulated	3	2.12287	0.1197	upregulated	4	3.78684	0.0227	downregulated	6	6.26056	0.0019	downregulated	2	2.00289	0.1349	upregulated	5	3.62274	0.0267	upregulated	6	2.87179	0.0566	downregulated	1	2.45008	0.0863
lung alveolus development	GO	4 out of 8	9.6505	downregulated	1	1.45462	0.2335	upregulated	1	0.607491	0.5447	downregulated	6	5.70897	0.0033	downregulated	3	2.78365	0.0618	downregulated	3	3.35773	0.0348	downregulated	3	2.89389	0.0554	upregulated	8	5.18885	0.0056	downregulated	4	1.52037	0.2186
cardiac muscle cell development	GO	5 out of 8	9.64226	downregulated	3	2.61831	0.0729	upregulated	3	1.51759	0.2192	downregulated	4	4.37894	0.0125	downregulated	2	3.47202	0.0311	downregulated	2	1.34432	0.2607	downregulated	2	1.08554	0.3377	upregulated	4	1.8502	0.1572	upregulated	3	1.27024	0.2808
integrator complex	GO	5 out of 8	9.63973									downregulated	2	0.918781	0.399	downregulated	2	2.09025	0.1237					upregulated	2	1.24008	0.2894	upregulated	5	4.34124	0.013	upregulated	2	1.04938	0.3502
astrocyte projection	GO	3 out of 8	9.61692									upregulated	1	1.79841	0.1656									upregulated	1	4.57668	0.0103	upregulated	1	3.84241	0.0214	upregulated	1	2.99624	0.05
outer membrane	GO	5 out of 8	9.6095	downregulated	4	0.869971	0.419	upregulated	9	2.92429	0.0537	downregulated	16	7.99076	0.0003	downregulated	10	4.35028	0.0129	downregulated	11	4.12818	0.0161	downregulated	19	3.23578	0.0393	upregulated	17	2.43264	0.0878	upregulated	12	1.01832	0.3612
detoxification	GO	7 out of 8	9.58924	downregulated	2	0.873676	0.4174	upregulated	7	4.54149	0.0107	downregulated	5	5.93511	0.0026	downregulated	4	3.29929	0.0369	upregulated	1	1.7361	0.1762	upregulated	3	0.781081	0.4579	upregulated	3	0.435778	0.6468	upregulated	7	1.06969	0.3431
proximal/distal pattern formation	GO	5 out of 8	9.58832	upregulated	1	0.494422	0.6099					downregulated	3	3.68573	0.0251	downregulated	2	2.77641	0.0623	upregulated	2	3.09497	0.0453	upregulated	2	1.40992	0.2442	downregulated	2	1.62946	0.196	upregulated	1	0.745165	0.4747
negative regulation of signal transduction by p53 class mediator	GO	5 out of 8	9.57556	upregulated	3	1.40338	0.2458	upregulated	3	3.2198	0.04	downregulated	3	3.29079	0.0372	downregulated	4	5.69115	0.0034					upregulated	3	1.93813	0.144	upregulated	3	0.849881	0.4275	upregulated	3	2.42879	0.0881
cytoplasm organization	GO	4 out of 8	9.56441	upregulated	1	1.06693	0.3441					downregulated	1	0.746164	0.4742									upregulated	2	3.33546	0.0356	upregulated	3	4.73988	0.0087	upregulated	2	1.80983	0.1637
organ growth	GO	5 out of 8	9.56412	downregulated	7	3.89353	0.0204	upregulated	1	0.224474	0.7989	upregulated	8	4.22149	0.0147	upregulated	3	5.48406	0.0042	upregulated	5	4.50854	0.011	upregulated	10	6.15682	0.0021	upregulated	10	4.11699	0.0163	upregulated	7	0.818262	0.4412
microtubule end	GO	5 out of 8	9.56058									downregulated	4	3.65352	0.0259	downregulated	3	2.90005	0.055	upregulated	1	2.06226	0.1272	upregulated	4	1.51638	0.2195	downregulated	3	1.53494	0.2155	upregulated	2	0.963306	0.3816
positive regulation of vasculogenesis	GO	5 out of 8	9.5373									downregulated	2	3.51467	0.0298	downregulated	1	2.01406	0.1334					upregulated	2	1.14353	0.3187	upregulated	1	0.347483	0.7065	upregulated	3	2.51757	0.0807
chemoattractant activity	GO	5 out of 8	9.50727	downregulated	1	3.61566	0.0269	downregulated	1	1.16032	0.3134	downregulated	2	3.61566	0.0269													upregulated	1	0.314728	0.73	upregulated	1	0.800896	0.4489
positive regulation of response to wounding	GO	6 out of 8	9.50227	downregulated	3	1.7009	0.1825	upregulated	3	2.96833	0.0514	downregulated	5	3.61033	0.027	downregulated	3	1.00677	0.3654	downregulated	1	0.763208	0.4662	upregulated	3	1.75642	0.1727	upregulated	3	4.01801	0.018	upregulated	2	1.14138	0.3194
ncRNA transcription	GO	7 out of 8	9.47744	upregulated	3	0.193203	0.8243	downregulated	1	0.307177	0.7355	downregulated	9	2.31137	0.0991	downregulated	4	1.03716	0.3545	upregulated	1	0.202789	0.8165	upregulated	8	1.85206	0.1569	upregulated	13	2.67179	0.0691	upregulated	7	1.28829	0.2757
chaperone binding	GO	5 out of 8	9.43681	upregulated	5	1.35385	0.2582	downregulated	2	0.515961	0.5969	downregulated	8	3.7505	0.0235	downregulated	2	0.241805	0.7852	downregulated	4	1.66685	0.1888	upregulated	9	3.95308	0.0192	upregulated	11	4.86363	0.0077	downregulated	5	0.867459	0.42
lipid modification	GO	5 out of 8	9.41075	upregulated	12	0.703844	0.4947	upregulated	13	2.9249	0.0537	downregulated	20	6.50278	0.0015	downregulated	11	2.94954	0.0524	upregulated	4	1.39059	0.2489	upregulated	19	0.507639	0.6019	downregulated	13	0.429259	0.651	upregulated	15	2.11821	0.1202
enteroendocrine cell differentiation	GO	4 out of 8	9.38455	upregulated	1	1.92653	0.1457					downregulated	2	2.73841	0.0647	upregulated	1	2.61145	0.0734	upregulated	2	4.37008	0.0127	upregulated	3	3.11124	0.0445	upregulated	3	3.70281	0.0247	upregulated	2	3.86094	0.021
regulation of PERK-mediated unfolded protein response	GO	6 out of 8	9.38337					upregulated	1	0.992992	0.3705	downregulated	2	3.53678	0.0291	downregulated	1	1.05353	0.3487	upregulated	1	3.18277	0.0415	upregulated	1	1.50832	0.2213	upregulated	2	0.8128	0.4436	upregulated	1	0.282156	0.7542
protein acetyltransferase complex	GO	6 out of 8	9.33975	upregulated	7	2.25375	0.105	upregulated	5	2.23726	0.1068	downregulated	7	1.69277	0.184	downregulated	1	0.0215252	0.9787	upregulated	1	1.05237	0.3491	upregulated	14	3.19826	0.0408	upregulated	14	3.52361	0.0295	upregulated	13	4.34222	0.013
hindbrain development	GO	5 out of 8	9.33296	upregulated	5	1.98689	0.1371	upregulated	6	2.30547	0.0997	downregulated	8	2.31406	0.0989	downregulated	3	0.37508	0.6872	upregulated	3	1.83578	0.1595	upregulated	11	4.24766	0.0143	upregulated	13	3.2551	0.0386	upregulated	13	3.43342	0.0323
hydrolase activity, acting on glycosyl bonds	GO	3 out of 8	9.29099	downregulated	3	1.68707	0.1851	upregulated	3	0.596034	0.551	downregulated	12	5.62137	0.0036	downregulated	9	6.83508	0.0011	downregulated	1	0.922039	0.3977	downregulated	4	1.32905	0.2647	downregulated	3	1.31711	0.2679	downregulated	2	0.68829	0.5024
centriole replication	GO	6 out of 8	9.28662									downregulated	4	2.67949	0.0686	downregulated	2	1.68535	0.1854	upregulated	1	2.69914	0.0673	upregulated	1	1.28287	0.2772	upregulated	1	0.652932	0.5205	upregulated	1	0.286843	0.7506
lymphocyte homeostasis	GO	4 out of 8	9.28072	upregulated	1	3.20113	0.0407					downregulated	5	4.23816	0.0144	downregulated	4	6.1017	0.0022	upregulated	1	2.21625	0.109	upregulated	6	2.95719	0.052	upregulated	6	2.91764	0.0541	upregulated	4	1.18963	0.3043
response to starvation	GO	5 out of 8	9.26529	downregulated	3	4.11197	0.0164	upregulated	5	1.29604	0.2736	downregulated	13	3.43703	0.0322	downregulated	10	4.78126	0.0084	downregulated	8	2.05513	0.1281	downregulated	11	2.21243	0.1094	upregulated	11	1.57849	0.2063	upregulated	15	0.920151	0.3985
peptidyl-prolyl cis-trans isomerase activity	GO	3 out of 8	9.25975	downregulated	1	3.80672	0.0222					upregulated	1	0.972727	0.3781									upregulated	1	3.00333	0.0496	upregulated	3	3.09385	0.0453	upregulated	5	3.16256	0.0423
Golgi cisterna	GO	4 out of 8	9.25386	upregulated	2	0.620893	0.5375	upregulated	4	1.69337	0.1839	upregulated	3	2.0702	0.1262	downregulated	5	1.77147	0.1701	upregulated	4	4.99658	0.0068	upregulated	11	3.51377	0.0298	upregulated	11	2.78072	0.062	upregulated	5	3.35651	0.0349
regulation of skeletal muscle cell differentiation	GO	6 out of 8	9.23801	upregulated	3	4.1564	0.0157	downregulated	1	1.48715	0.226	downregulated	2	2.33424	0.0969					upregulated	1	2.04591	0.1293	upregulated	2	2.18948	0.112	upregulated	3	2.13967	0.1177	upregulated	2	3.19796	0.0408
embryonic cranial skeleton morphogenesis	GO	6 out of 8	9.23765	upregulated	1	2.87459	0.0564					downregulated	8	4.53862	0.0107	downregulated	2	1.33025	0.2644	upregulated	1	0.367609	0.6924	upregulated	5	2.036	0.1306	upregulated	8	2.98684	0.0504	upregulated	5	0.852933	0.4262
oxidoreductase activity, acting on peroxide as acceptor	GO	3 out of 8	9.22683	downregulated	1	0.718808	0.4873	downregulated	1	1.16766	0.3111	downregulated	4	6.83376	0.0011	downregulated	3	4.02889	0.0178	downregulated	1	0.934779	0.3927	downregulated	2	0.627938	0.5337	downregulated	1	0.651385	0.5213	downregulated	2	0.79191	0.453
endodermal cell fate commitment	GO	4 out of 8	9.21771													downregulated	1	1.60292	0.2013	upregulated	1	2.21792	0.1088	upregulated	2	2.07908	0.125	upregulated	1	1.94287	0.1433	upregulated	2	2.97784	0.0509
blood coagulation	GO	5 out of 8	9.16749	downregulated	6	0.8	0.4493	upregulated	13	5.57395	0.0038	downregulated	24	4.40117	0.0123	downregulated	14	3.87733	0.0207	downregulated	10	2.91067	0.0544	upregulated	24	2.68963	0.0679	upregulated	25	4.29267	0.0137	upregulated	17	4.28094	0.0138
positive regulation of chromosome organization	GO	5 out of 8	9.16308	upregulated	11	2.53116	0.0796	upregulated	9	3.83248	0.0217	downregulated	15	3.09533	0.0453	downregulated	13	5.28727	0.0051	upregulated	1	0.239473	0.787	upregulated	14	2.1341	0.1184	upregulated	21	2.54283	0.0786	upregulated	20	2.46718	0.0848
kinase activator activity	GO	5 out of 8	9.15943	upregulated	4	0.562308	0.5699	downregulated	1	1.12997	0.323	downregulated	6	5.11219	0.006	downregulated	6	3.05291	0.0472	upregulated	2	1.26784	0.2814	downregulated	5	0.850541	0.4272	upregulated	5	0.740287	0.477	downregulated	7	0.730924	0.4815
defense response to Gram-negative bacterium	GO	5 out of 8	9.14252	downregulated	2	1.07888	0.34	upregulated	2	2.36916	0.0936	downregulated	4	4.17137	0.0154	downregulated	4	4.97216	0.0069					upregulated	2	0.845356	0.4294	upregulated	2	0.678368	0.5074	downregulated	1	0.234461	0.791
coagulation	GO	5 out of 8	9.12772	downregulated	6	0.797957	0.4502	upregulated	13	5.56025	0.0038	downregulated	24	4.39588	0.0123	downregulated	14	3.86162	0.021	downregulated	10	2.90376	0.0548	upregulated	24	2.67843	0.0687	upregulated	25	4.27153	0.014	upregulated	17	4.26474	0.0141
signal transduction involved in mitotic G1 DNA damage checkpoint	GO	6 out of 8	9.11702	upregulated	1	0.0242328	0.9761	upregulated	4	3.79104	0.0226	downregulated	9	6.86057	0.001	downregulated	4	2.69796	0.0673	upregulated	2	0.847431	0.4285	upregulated	7	1.34642	0.2602	upregulated	8	0.809711	0.445	upregulated	4	0.370212	0.6906
signal transduction involved in mitotic cell cycle checkpoint	GO	6 out of 8	9.11702	upregulated	1	0.0242328	0.9761	upregulated	4	3.79104	0.0226	downregulated	9	6.86057	0.001	downregulated	4	2.69796	0.0673	upregulated	2	0.847431	0.4285	upregulated	7	1.34642	0.2602	upregulated	8	0.809711	0.445	upregulated	4	0.370212	0.6906
signal transduction involved in mitotic DNA damage checkpoint	GO	6 out of 8	9.11702	upregulated	1	0.0242328	0.9761	upregulated	4	3.79104	0.0226	downregulated	9	6.86057	0.001	downregulated	4	2.69796	0.0673	upregulated	2	0.847431	0.4285	upregulated	7	1.34642	0.2602	upregulated	8	0.809711	0.445	upregulated	4	0.370212	0.6906
endoderm development	GO	6 out of 8	9.10431	upregulated	1	1.09506	0.3345	upregulated	1	0.681151	0.506	downregulated	5	3.49705	0.0303	downregulated	4	3.23521	0.0394	upregulated	1	0.590229	0.5542	upregulated	7	1.43039	0.2392	upregulated	8	1.22635	0.2934	upregulated	6	0.901287	0.406
kinetochore	GO	4 out of 8	9.10183	upregulated	13	6.94885	0.001	upregulated	17	14.0367	8e-07	downregulated	13	5.18169	0.0056	downregulated	8	2.67375	0.069	upregulated	2	0.992282	0.3707	upregulated	12	2.26061	0.1043	upregulated	15	3.86798	0.0209	upregulated	11	1.98096	0.1379
alcohol metabolic process	GO	4 out of 8	9.09066	downregulated	7	3.93942	0.0195	upregulated	11	2.87107	0.0566	downregulated	19	8.57857	0.0002	downregulated	19	12.6285	3.3e-06	upregulated	2	2.26374	0.104	upregulated	10	2.40392	0.0904	upregulated	8	1.88505	0.1518	upregulated	12	2.53794	0.079
negative regulation of mitotic sister chromatid separation	GO	5 out of 8	9.07882	upregulated	2	3.13284	0.0436					downregulated	3	3.17808	0.0417	downregulated	4	6.27422	0.0019					upregulated	1	0.518705	0.5953	upregulated	2	1.56113	0.2099	upregulated	2	0.679512	0.5069
lymphocyte proliferation	GO	5 out of 8	9.07305	upregulated	2	2.61449	0.0732	upregulated	2	0.309906	0.7335	downregulated	4	3.94184	0.0194	downregulated	4	4.44159	0.0118	upregulated	2	1.8414	0.1586	upregulated	4	1.02231	0.3598	upregulated	4	0.986379	0.3729	downregulated	4	0.236068	0.7897
inner dynein arm assembly	GO	3 out of 8	9.0391																					upregulated	1	2.88214	0.056	upregulated	3	3.29796	0.037	upregulated	2	2.859	0.0573
ATPase activator activity	GO	3 out of 8	9.02739					upregulated	1	1.08771	0.337	downregulated	1	1.06682	0.3441					upregulated	1	1.49549	0.2241	upregulated	3	1.4259	0.2403	upregulated	4	2.73242	0.0651	upregulated	5	4.79949	0.0082
ruffle assembly	GO	6 out of 8	9.01447	upregulated	1	1.95865	0.141	upregulated	1	1.57393	0.2072	downregulated	1	0.543173	0.5809	downregulated	1	1.37977	0.2516	upregulated	1	2.46756	0.0848	upregulated	2	3.2063	0.0405	upregulated	2	2.05872	0.1276	upregulated	1	2.89152	0.0555
positive regulation of ATP metabolic process	GO	6 out of 8	9.00889	upregulated	2	3.06368	0.0467					downregulated	4	3.09405	0.0453	downregulated	2	2.30249	0.1	upregulated	1	2.44465	0.0868	upregulated	2	1.56583	0.2089	upregulated	3	0.773564	0.4614	upregulated	5	1.89199	0.1508
response to alcohol	GO	5 out of 8	9.00759	downregulated	3	1.02307	0.3595	upregulated	6	3.28884	0.0373	downregulated	16	4.55192	0.0105	downregulated	12	5.31786	0.0049	upregulated	3	2.1054	0.1218	downregulated	12	1.54538	0.2132	upregulated	19	1.61664	0.1986	downregulated	12	0.773082	0.4616
axis specification	GO	7 out of 8	8.98967	upregulated	5	2.10984	0.1213	downregulated	1	0.960665	0.3826	downregulated	5	1.94233	0.1434	downregulated	1	0.188716	0.828	upregulated	2	1.9803	0.138	upregulated	9	2.61104	0.0735	upregulated	9	0.867549	0.42	upregulated	8	2.54891	0.0782
negative regulation of establishment of protein localization	GO	5 out of 8	8.96685	upregulated	8	2.39406	0.0913	upregulated	4	3.12271	0.044	downregulated	3	0.523886	0.5922	downregulated	4	0.773452	0.4614	downregulated	8	4.23421	0.0145	upregulated	10	4.70912	0.009	upregulated	14	11.3333	1.2e-05	upregulated	9	1.37809	0.2521
mononuclear cell proliferation	GO	5 out of 8	8.96069	upregulated	2	2.57351	0.0763	upregulated	2	0.293804	0.7454	downregulated	4	3.87977	0.0207	downregulated	4	4.37785	0.0126	upregulated	2	1.81789	0.1624	upregulated	4	1.00199	0.3671	upregulated	4	0.966287	0.3805	downregulated	4	0.215785	0.8059
polysome	GO	4 out of 8	8.93661	upregulated	2	0.370377	0.6905	upregulated	2	1.14056	0.3196	upregulated	3	1.72701	0.1778	upregulated	1	1.18517	0.3057	upregulated	1	1.08246	0.3388	upregulated	6	1.42375	0.2408	upregulated	11	3.82797	0.0218	upregulated	10	2.60243	0.0741
regulation of epithelial cell apoptotic process	GO	6 out of 8	8.93264	upregulated	2	1.89152	0.1508	downregulated	1	0.861353	0.4226	downregulated	7	2.15339	0.1161	downregulated	6	3.62465	0.0267	upregulated	2	1.50708	0.2216	upregulated	6	1.69909	0.1829	upregulated	7	1.26028	0.2836	downregulated	2	0.281681	0.7545
regulation of extrinsic apoptotic signaling pathway via death domain receptors	GO	5 out of 8	8.92783	upregulated	1	0.0162081	0.9839	upregulated	2	4.90364	0.0074	downregulated	4	1.18886	0.3046	upregulated	1	1.98648	0.1372	upregulated	2	2.52447	0.0801	upregulated	5	5.65118	0.0035	upregulated	7	4.0314	0.0177	upregulated	4	2.43826	0.0873
endocrine system development	GO	4 out of 8	8.90283	upregulated	4	1.23291	0.2914	downregulated	1	1.6224	0.1974	upregulated	3	1.77316	0.1698	upregulated	2	1.28402	0.2769	downregulated	6	3.38057	0.034	upregulated	12	3.97122	0.0189	upregulated	13	4.25163	0.0142	upregulated	9	3.34767	0.0352
morphogenesis of embryonic epithelium	GO	6 out of 8	8.88511	upregulated	3	0.58956	0.5546	upregulated	4	2.52884	0.0798	downregulated	13	6.14111	0.0022	downregulated	4	0.637167	0.5288	upregulated	3	2.03371	0.1308	upregulated	10	1.65094	0.1919	upregulated	14	1.10126	0.3325	upregulated	6	0.439329	0.6445
mitotic G1/S transition checkpoint	GO	6 out of 8	8.88038	upregulated	3	0.273072	0.761	upregulated	4	3.55457	0.0286	downregulated	9	6.2306	0.002	downregulated	5	2.73367	0.065	upregulated	2	0.764413	0.4656	upregulated	7	1.10206	0.3322	upregulated	10	1.28315	0.2772	upregulated	6	0.59413	0.552
regulation of vasculogenesis	GO	5 out of 8	8.86659	upregulated	1	1.04409	0.352					downregulated	2	2.88317	0.056	downregulated	1	1.74171	0.1752					upregulated	3	1.57834	0.2063	upregulated	2	0.714798	0.4893	upregulated	4	2.99266	0.0502
nitric oxide biosynthetic process	GO	2 out of 8	8.80642																	upregulated	1	4.2146	0.0148	upregulated	1	4.59182	0.0101	upregulated	1	3.45381	0.0316	upregulated	2	5.37703	0.0046
hemostasis	GO	5 out of 8	8.80168	downregulated	6	0.78585	0.4557	upregulated	13	5.53988	0.0039	downregulated	24	4.36445	0.0127	downregulated	14	3.76878	0.0231	downregulated	10	2.89349	0.0554	upregulated	25	2.61225	0.0734	upregulated	25	4.14693	0.0158	upregulated	17	4.16903	0.0155
negative regulation of reactive oxygen species biosynthetic process	GO	7 out of 8	8.79913	downregulated	2	2.40966	0.0898	upregulated	2	2.96104	0.0518	downregulated	2	1.27522	0.2794	downregulated	1	0.55688	0.573	upregulated	1	1.37659	0.2524	upregulated	2	2.49714	0.0823	upregulated	4	2.78245	0.0619	upregulated	3	0.862238	0.4222
response to mitochondrial depolarisation	GO	6 out of 8	8.79581	downregulated	1	1.30306	0.2717					downregulated	3	1.81018	0.1636	downregulated	2	1.9007	0.1495	upregulated	1	1.59709	0.2025	upregulated	1	0.899436	0.4068	upregulated	1	1.28534	0.2766
negative regulation of cyclin-dependent protein kinase activity	GO	5 out of 8	8.73766	upregulated	2	1.46793	0.2304	downregulated	1	2.03281	0.131	downregulated	2	1.97797	0.1383	upregulated	1	2.72501	0.0655	upregulated	1	1.78226	0.1683	upregulated	3	2.99984	0.0498	upregulated	3	2.60069	0.0742	downregulated	2	1.18799	0.3048
response to ethanol	GO	6 out of 8	8.7302	upregulated	1	0.399669	0.6705	upregulated	4	3.8518	0.0212	downregulated	8	5.15229	0.0058	downregulated	5	2.18168	0.1129	upregulated	2	2.92866	0.0535	upregulated	4	1.32138	0.2668	upregulated	8	0.833994	0.4343	upregulated	9	0.563669	0.5691
collagen binding	GO	4 out of 8	8.72435	upregulated	2	0.657321	0.5182	upregulated	1	2.91342	0.0543	downregulated	6	3.85737	0.0211	downregulated	8	8.70292	0.0002	upregulated	2	1.93491	0.1444	upregulated	7	3.88031	0.0206	upregulated	7	1.50302	0.2225	upregulated	3	1.40611	0.2451
peptide transmembrane transporter activity	GO	4 out of 8	8.70686	upregulated	1	0.272256	0.7617					downregulated	2	6.04108	0.0024									upregulated	2	0.692174	0.5005	upregulated	2	0.357242	0.6996	upregulated	3	1.88862	0.1513
cytoplasmic ribonucleoprotein granule	GO	5 out of 8	8.70212	upregulated	8	1.15344	0.3155	downregulated	3	2.26415	0.1039	downregulated	18	2.29973	0.1003	downregulated	12	3.09588	0.0452	downregulated	9	1.53163	0.2162	downregulated	13	1.3795	0.2517	upregulated	27	3.54573	0.0288	upregulated	24	1.5612	0.2099
signal transduction in response to DNA damage	GO	7 out of 8	8.69425	downregulated	1	1.79531	0.1661	upregulated	8	3.4851	0.0307	downregulated	10	3.53247	0.0292	downregulated	5	1.38032	0.2515	upregulated	3	1.73289	0.1768	upregulated	10	2.08865	0.1239	upregulated	12	1.03882	0.3539	upregulated	8	0.61089	0.5429
autolysosome	GO	4 out of 8	8.68928									downregulated	2	4.58919	0.0102	downregulated	3	6.78428	0.0011	downregulated	2	2.54437	0.0785	downregulated	2	3.13266	0.0436	upregulated	2	2.08433	0.1244	upregulated	1	0.90851	0.4031
positive regulation of execution phase of apoptosis	GO	4 out of 8	8.65913									downregulated	3	3.96076	0.019	downregulated	1	1.11812	0.3269	upregulated	1	3.39388	0.0336	upregulated	1	1.7002	0.1826	downregulated	1	1.51383	0.2201
angiogenesis	GO	4 out of 8	8.61832	downregulated	9	2.18367	0.1126	upregulated	10	4.30645	0.0135	downregulated	39	20.3118	1.5e-09	downregulated	25	10.097	4.1e-05	upregulated	9	2.76624	0.0629	upregulated	18	2.17316	0.1138	upregulated	26	2.66371	0.0697	upregulated	11	1.01521	0.3623
acid-thiol ligase activity	GO	5 out of 8	8.61589	downregulated	3	4.49222	0.0112	upregulated	1	0.589359	0.5547	upregulated	4	5.89066	0.0028	downregulated	1	1.01673	0.3618	downregulated	1	1.47379	0.2291	upregulated	4	2.63287	0.0719	upregulated	3	2.57357	0.0763	upregulated	3	5.8543	0.0029
antimicrobial humoral immune response mediated by antimicrobial peptide	GO	5 out of 8	8.60568	downregulated	1	1.45272	0.2339	upregulated	1	2.75095	0.0639	downregulated	6	4.45586	0.0116	downregulated	4	5.28681	0.0051									upregulated	1	0.0521767	0.9492	upregulated	2	0.109066	0.8967
genitalia development	GO	6 out of 8	8.58898	downregulated	2	1.66949	0.1883	downregulated	1	1.11236	0.3288	downregulated	3	4.07411	0.017									upregulated	3	0.752926	0.471	upregulated	4	0.624118	0.5357	upregulated	2	0.355979	0.7005
G-protein coupled receptor binding	GO	4 out of 8	8.55309	upregulated	8	3.78076	0.0228	upregulated	6	2.4696	0.0846	upregulated	11	5.52094	0.004	downregulated	11	2.20052	0.1107	upregulated	5	2.10283	0.1221	upregulated	14	2.2086	0.1099	upregulated	15	1.65569	0.191	upregulated	16	2.58597	0.0753
steroid biosynthetic process	GO	3 out of 8	8.52734	upregulated	4	0.613946	0.5412	upregulated	6	2.57115	0.0764	downregulated	9	3.87099	0.0208	downregulated	11	8.18518	0.0003	downregulated	3	1.20359	0.3001	upregulated	1	1.65614	0.1909	downregulated	4	0.713792	0.4898	downregulated	2	0.0824962	0.9208
hormone activity	GO	4 out of 8	8.5102	downregulated	3	4.14288	0.0159	downregulated	1	0.329124	0.7196	upregulated	2	2.22814	0.1077	upregulated	1	1.21252	0.2974	upregulated	1	1.72721	0.1778	upregulated	1	1.99134	0.1365	upregulated	3	1.82742	0.1608	upregulated	3	2.96424	0.0516
ossification	GO	4 out of 8	8.48857	downregulated	11	2.9567	0.052	upregulated	15	8.98707	0.0001	downregulated	14	3.53175	0.0293	downregulated	6	2.31986	0.0983	upregulated	4	0.925192	0.3965	upregulated	21	1.94856	0.1425	upregulated	23	3.67952	0.0252	upregulated	18	1.9353	0.1444
regulation of cytokine biosynthetic process	GO	4 out of 8	8.48373	downregulated	1	0.936486	0.392	upregulated	4	8.1205	0.0003	downregulated	10	4.11067	0.0164	downregulated	9	12.6394	3.2e-06					downregulated	1	1.12106	0.3259	upregulated	4	0.0387313	0.962
intramolecular transferase activity	GO	3 out of 8	8.48094	upregulated	1	0.636593	0.5291	downregulated	1	2.4188	0.089	downregulated	2	3.25466	0.0386	downregulated	4	7.76087	0.0004					downregulated	2	1.45941	0.2324	downregulated	1	0.63647	0.5292	downregulated	1	2.22091	0.1085
antigen processing and presentation of endogenous antigen	GO	3 out of 8	8.47258	upregulated	1	0.721747	0.4859					downregulated	3	4.37459	0.0126	downregulated	2	4.65109	0.0096									upregulated	1	0.168657	0.8448
CD8-positive, alpha-beta T cell activation	GO	3 out of 8	8.47211	upregulated	1	1.68806	0.1849					downregulated	2	2.89689	0.0552	downregulated	2	5.8698	0.0028									upregulated	2	1.39348	0.2482
positive regulation of interleukin-8 secretion	GO	2 out of 8	8.45814					upregulated	1	2.79718	0.061	downregulated	2	2.06073	0.1274	downregulated	3	9.19459	0.0001
response to peptide	GO	6 out of 8	8.45544	downregulated	14	3.24285	0.0391	upregulated	17	11.9458	6.5e-06	downregulated	29	4.22406	0.0146	downregulated	23	6.23794	0.002	downregulated	11	1.16279	0.3126	upregulated	36	3.08529	0.0457	upregulated	37	4.05223	0.0174	upregulated	28	0.721694	0.4859
response to salt	GO	5 out of 8	8.41929	upregulated	1	1.2534	0.2855	downregulated	1	3.52707	0.0294	downregulated	2	3.07389	0.0462									upregulated	1	0.348476	0.7058	upregulated	2	0.613346	0.5415	upregulated	3	2.10992	0.1212
regulation of miRNA metabolic process	GO	4 out of 8	8.41626					upregulated	1	2.18494	0.1125	downregulated	4	5.26006	0.0052	downregulated	2	2.91168	0.0544					upregulated	2	1.8461	0.1579	upregulated	2	2.39524	0.0912	downregulated	2	1.81188	0.1633
positive regulation of extrinsic apoptotic signaling pathway via death domain receptors	GO	4 out of 8	8.34897									upregulated	1	1.09048	0.3361	upregulated	1	2.93877	0.0529	upregulated	1	2.98443	0.0506	upregulated	2	3.15322	0.0427	upregulated	3	2.59889	0.0744	upregulated	2	3.64169	0.0262
negative regulation of DNA-dependent DNA replication	GO	4 out of 8	8.34424	upregulated	1	0.707733	0.4928	upregulated	1	0.578658	0.5606	downregulated	3	3.43885	0.0321	downregulated	2	2.49383	0.0826					upregulated	1	1.59836	0.2022	upregulated	2	2.09959	0.1225
oxidoreductase activity, acting on single donors with incorporation of molecular oxygen, incorporation of two atoms of oxygen	GO	4 out of 8	8.3017	downregulated	1	3.8895	0.0205	upregulated	1	2.28139	0.1021	downregulated	2	2.25318	0.1051	downregulated	1	4.53655	0.0107					downregulated	1	0.258223	0.7724	downregulated	2	0.710514	0.4914	upregulated	2	0.872593	0.4179
leukocyte homeostasis	GO	4 out of 8	8.24844	upregulated	1	2.82605	0.0592					downregulated	8	7.26602	0.0007	downregulated	5	5.25572	0.0052	upregulated	1	1.98377	0.1375	upregulated	6	1.95458	0.1416	upregulated	7	3.24166	0.0391	upregulated	5	1.06842	0.3436
phagocytosis, recognition	GO	5 out of 8	8.24819	downregulated	2	2.68584	0.0682					downregulated	2	0.746432	0.4741	upregulated	1	1.53219	0.2161					upregulated	1	0.527958	0.5898	upregulated	2	4.45469	0.0116	upregulated	1	1.36545	0.2553
positive regulation of plasma membrane bounded cell projection assembly	GO	4 out of 8	8.23515	upregulated	4	2.76893	0.0627	upregulated	3	5.06708	0.0063	downregulated	13	5.62531	0.0036	downregulated	9	7.55119	0.0005	upregulated	4	4.33133	0.0131	downregulated	10	3.02096	0.0488	upregulated	9	2.06025	0.1274	downregulated	5	0.475958	0.6213
modification-dependent protein binding	GO	5 out of 8	8.2001	upregulated	9	0.956239	0.3843	upregulated	12	4.00592	0.0182	upregulated	7	3.09726	0.0452	downregulated	14	6.33223	0.0018	upregulated	3	0.94151	0.39	upregulated	14	1.77921	0.1688	upregulated	20	3.04032	0.0478	upregulated	19	4.16626	0.0155
osteoblast differentiation	GO	4 out of 8	8.18467	downregulated	3	2.33196	0.0971	upregulated	9	8.06331	0.0003	downregulated	9	4.40683	0.0122	downregulated	5	4.12118	0.0162	upregulated	3	1.85037	0.1572	upregulated	11	1.55487	0.2112	upregulated	11	3.12895	0.0438	upregulated	8	1.65048	0.192
flavin adenine dinucleotide binding	GO	5 out of 8	8.17862	downregulated	1	0.387986	0.6784	downregulated	3	4.72071	0.0089	downregulated	5	1.68509	0.1854	downregulated	3	3.2816	0.0376	downregulated	1	0.241218	0.7857	upregulated	3	0.677171	0.5081	downregulated	2	1.10218	0.3321	downregulated	5	1.23054	0.2921
positive regulation of mitotic cell cycle phase transition	GO	6 out of 8	8.15273	upregulated	2	0.273227	0.7609	downregulated	1	1.19315	0.3033	downregulated	5	1.29448	0.274	downregulated	2	0.783109	0.457	downregulated	1	0.0635737	0.9384	upregulated	6	1.10436	0.3314	upregulated	5	1.03483	0.3553	upregulated	9	3.07961	0.046
tissue homeostasis	GO	4 out of 8	8.14822	downregulated	6	2.28557	0.1017	upregulated	6	4.17397	0.0154	downregulated	11	6.58247	0.0014	downregulated	12	8.85721	0.0001	upregulated	3	2.8374	0.0586	upregulated	12	2.33128	0.0972	upregulated	9	1.83967	0.1589	upregulated	13	1.13987	0.3199
regulation of myeloid cell differentiation	GO	3 out of 8	8.14629	upregulated	5	1.32814	0.265	upregulated	5	3.36151	0.0347	downregulated	19	2.97995	0.0508	downregulated	17	11.1939	1.4e-05	downregulated	5	5.25697	0.0052	downregulated	10	4.72322	0.0089	downregulated	9	4.22111	0.0147	upregulated	23	3.91905	0.0199
mitotic cell cycle arrest	GO	5 out of 8	8.12922	upregulated	1	0.532666	0.587					downregulated	2	3.38069	0.034	downregulated	1	0.767071	0.4644					upregulated	3	2.28445	0.1018	upregulated	3	1.43922	0.2371	upregulated	2	0.790464	0.4536
cerebral cortex development	GO	5 out of 8	8.12162	upregulated	3	0.839943	0.4317	upregulated	6	6.1683	0.0021	downregulated	8	3.97101	0.0189	downregulated	6	3.75367	0.0234	upregulated	4	2.35917	0.0945	downregulated	8	2.70883	0.0666	upregulated	14	1.73359	0.1766	upregulated	14	3.31242	0.0364
positive regulation of cellular senescence	GO	4 out of 8	8.11439	upregulated	1	1.89575	0.1502					downregulated	1	0.702052	0.4956									upregulated	1	3.37154	0.0343	upregulated	1	3.18007	0.0416	upregulated	1	2.75648	0.0635
transcriptional repressor complex	GO	5 out of 8	8.0924	upregulated	6	1.90005	0.1496	downregulated	2	2.61015	0.0735	upregulated	3	0.979915	0.3753	downregulated	2	0.516411	0.5967	upregulated	3	2.6185	0.0729	upregulated	7	2.03755	0.1303	upregulated	12	2.03369	0.1309	upregulated	13	3.76621	0.0231
positive regulation of transcription from RNA polymerase II promoter in response to stress	GO	3 out of 8	8.00349	downregulated	3	6.7554	0.0012	upregulated	2	1.53149	0.2162	downregulated	3	2.02717	0.1317	downregulated	3	2.87279	0.0565					downregulated	1	0.143969	0.8659	upregulated	3	0.761922	0.4668	downregulated	2	0.711164	0.4911
regulation of myoblast fusion	GO	5 out of 8	7.9587					upregulated	2	1.49955	0.2232	downregulated	1	1.62755	0.1964	downregulated	1	2.69396	0.0676	upregulated	1	1.33017	0.2644	upregulated	1	2.44539	0.0867	upregulated	2	1.92506	0.1459	downregulated	2	0.563879	0.569
negative regulation of angiogenesis	GO	6 out of 8	7.95414	downregulated	5	2.11086	0.1211	upregulated	4	3.2977	0.037	downregulated	5	3.16102	0.0424	downregulated	5	2.14083	0.1176	upregulated	3	2.06481	0.1268	upregulated	6	1.91084	0.148	upregulated	8	0.722724	0.4854	downregulated	6	0.85925	0.4235
negative regulation of vasculature development	GO	6 out of 8	7.94526	downregulated	6	2.48814	0.0831	upregulated	4	3.03624	0.048	downregulated	6	2.59836	0.0744	downregulated	6	2.00466	0.1347	upregulated	3	1.83063	0.1603	upregulated	7	1.77561	0.1694	upregulated	10	0.97943	0.3755	downregulated	7	0.695325	0.4989
peptidase activator activity	GO	6 out of 8	7.94031	downregulated	2	1.35176	0.2588	upregulated	4	2.40964	0.0898	upregulated	2	2.93951	0.0529	downregulated	6	5.14518	0.0058	upregulated	2	1.63452	0.195	upregulated	3	2.9167	0.0541	upregulated	5	2.15523	0.1159	upregulated	1	0.0860633	0.9175
spinal cord development	GO	5 out of 8	7.93376	downregulated	2	1.77024	0.1703	upregulated	3	2.7882	0.0615	downregulated	8	1.92935	0.1452	downregulated	4	1.16569	0.3117	downregulated	3	2.75516	0.0636	upregulated	5	3.21035	0.0403	upregulated	7	2.16497	0.1148	upregulated	5	5.40148	0.0045
protein phosphatase activator activity	GO	5 out of 8	7.92832	downregulated	1	1.92416	0.146	upregulated	1	1.09917	0.3331	downregulated	1	1.57215	0.2076	downregulated	1	5.18504	0.0056					upregulated	1	0.490688	0.6122	upregulated	2	0.743211	0.4756	upregulated	2	0.684386	0.5044
endocytic patch	GO	2 out of 8	7.91547	downregulated	2	4.31911	0.0133					downregulated	2	3.59636	0.0274					upregulated	1	2.59213	0.0749	downregulated	2	2.92255	0.0538	downregulated	2	3.38785	0.0338	upregulated	1	2.55836	0.0774
actin cortical patch	GO	2 out of 8	7.91547	downregulated	2	4.31911	0.0133					downregulated	2	3.59636	0.0274					upregulated	1	2.59213	0.0749	downregulated	2	2.92255	0.0538	downregulated	2	3.38785	0.0338	upregulated	1	2.55836	0.0774
response to cAMP	GO	4 out of 8	7.87223	downregulated	4	5.60456	0.0037	downregulated	1	0.278231	0.7571	downregulated	6	1.16735	0.3112	downregulated	7	3.97458	0.0188	downregulated	2	0.161811	0.8506	downregulated	3	0.186055	0.8302	downregulated	5	0.188453	0.8282	downregulated	7	2.61617	0.0731
GABAergic neuron differentiation	GO	3 out of 8	7.84534									downregulated	1	4.2402	0.0144	downregulated	1	3.22611	0.0397					upregulated	1	1.45155	0.2342	downregulated	1	0.460638	0.6309	downregulated	1	0.611889	0.5423
cell adhesion mediator activity	GO	4 out of 8	7.84277	downregulated	3	1.92063	0.1465	upregulated	1	0.615243	0.5405	downregulated	7	7.48731	0.0006	downregulated	3	4.38977	0.0124	downregulated	1	0.785806	0.4558	downregulated	6	3.34019	0.0354	downregulated	5	2.60925	0.0736	upregulated	3	1.39555	0.2477
regulation of RNA polymerase II transcriptional preinitiation complex assembly	GO	5 out of 8	7.82412	upregulated	3	2.37031	0.0935	upregulated	1	1.73587	0.1762	downregulated	1	0.337971	0.7132					upregulated	1	1.8755	0.1533	upregulated	2	1.95245	0.1419	upregulated	4	3.6655	0.0256	upregulated	3	4.09887	0.0166
positive regulation of cyclin-dependent protein kinase activity	GO	5 out of 8	7.81428					downregulated	1	1.28394	0.2769	upregulated	2	2.71006	0.0665	downregulated	2	1.21247	0.2975	downregulated	1	1.40444	0.2455	upregulated	5	2.43082	0.088	upregulated	6	3.44972	0.0318	upregulated	4	3.55184	0.0287
modulation by virus of host morphology or physiology	GO	7 out of 8	7.80939	downregulated	3	4.27435	0.0139	upregulated	2	5.15002	0.0058	downregulated	1	0.908462	0.4031	downregulated	1	0.660561	0.5166	upregulated	1	2.54566	0.0784	upregulated	3	1.58685	0.2046	upregulated	5	2.45024	0.0863	upregulated	4	0.533299	0.5867
P-body	GO	3 out of 8	7.79623	upregulated	1	1.93764	0.144	upregulated	6	3.23088	0.0395	upregulated	3	1.69302	0.184	downregulated	3	0.4877	0.614	downregulated	4	1.5997	0.202	upregulated	12	2.7324	0.0651	upregulated	14	3.79016	0.0226	upregulated	11	2.87337	0.0565
positive regulation of autophagosome assembly	GO	4 out of 8	7.79612	upregulated	1	0.769049	0.4635	upregulated	1	1.62709	0.1965	downregulated	1	3.55814	0.0285	downregulated	3	6.30589	0.0018					upregulated	1	1.49385	0.2245	upregulated	1	1.32227	0.2665	downregulated	2	2.48789	0.0831
inclusion body	GO	8 out of 8	7.7416	downregulated	3	1.73334	0.1767	downregulated	2	0.679186	0.507	downregulated	6	1.87617	0.1532	downregulated	2	0.280273	0.7556	upregulated	2	1.7361	0.1762	upregulated	5	0.435809	0.6467	upregulated	9	0.477233	0.6205	upregulated	2	0.523489	0.5925
interleukin-2-mediated signaling pathway	GO	4 out of 8	7.72048									downregulated	1	2.27308	0.103	downregulated	1	3.76622	0.0231					upregulated	1	0.638061	0.5283	upregulated	1	1.04312	0.3524
regulation of plasma lipoprotein particle levels	GO	4 out of 8	7.69313	downregulated	1	0.351697	0.7035	upregulated	4	3.16975	0.042	downregulated	6	6.1729	0.0021	downregulated	5	7.25437	0.0007	downregulated	2	1.82926	0.1605	downregulated	6	2.45972	0.0855	upregulated	2	3.81303	0.0221	downregulated	6	2.44015	0.0871
insulin receptor substrate binding	GO	5 out of 8	7.67536	upregulated	2	2.38991	0.0916	upregulated	1	0.88142	0.4142	downregulated	1	2.11974	0.1201	downregulated	1	1.66697	0.1888					upregulated	2	1.88107	0.1524	upregulated	3	2.24454	0.106	upregulated	3	3.03437	0.0481
carbohydrate metabolic process	GO	4 out of 8	7.6565	downregulated	6	3.35987	0.0347	upregulated	21	4.65	0.0096	upregulated	16	4.67798	0.0093	downregulated	18	2.64967	0.0707	upregulated	3	1.63846	0.1943	upregulated	12	2.21906	0.1087	upregulated	21	1.42937	0.2395	upregulated	12	2.36961	0.0935
oxidoreductase activity, acting on the CH-OH group of donors, NAD or NADP as acceptor	GO	3 out of 8	7.65473	downregulated	3	2.26817	0.1035	upregulated	6	2.76263	0.0631	upregulated	3	2.2643	0.1039	downregulated	10	7.4019	0.0006	downregulated	1	0.36033	0.6974	downregulated	4	0.193481	0.8241	downregulated	7	0.784892	0.4562	upregulated	4	1.89251	0.1507
DNA methylation	GO	4 out of 8	7.5712	downregulated	1	0.658603	0.5176	upregulated	1	0.352286	0.7031	downregulated	3	0.956975	0.3841	downregulated	3	2.2595	0.1044	upregulated	1	1.31957	0.2673	upregulated	4	1.40782	0.2447	upregulated	5	2.96157	0.0517	upregulated	4	1.88224	0.1522
regulation of integrin-mediated signaling pathway	GO	5 out of 8	7.56054					upregulated	1	3.58182	0.0278	downregulated	2	3.83882	0.0215	downregulated	2	2.82179	0.0595					upregulated	2	1.99291	0.1363	upregulated	2	1.36353	0.2558	upregulated	2	1.12531	0.3246
U12-type spliceosomal complex	GO	3 out of 8	7.55512					upregulated	3	3.63204	0.0265	upregulated	1	1.7117	0.1806	downregulated	1	0.750303	0.4722					upregulated	2	0.724403	0.4846	upregulated	4	1.54618	0.2131	upregulated	6	5.28453	0.0051
regulation of female gonad development	GO	4 out of 8	7.54992									downregulated	1	2.11974	0.1201	downregulated	1	2.02506	0.132									upregulated	2	1.71618	0.1798	upregulated	2	1.68893	0.1847
laminin binding	GO	3 out of 8	7.5484	upregulated	1	0.264614	0.7675					downregulated	2	5.62926	0.0036	downregulated	3	4.85253	0.0078	downregulated	2	2.15527	0.1159	downregulated	2	1.04833	0.3505	upregulated	2	0.534828	0.5858
positive regulation of p38MAPK cascade	GO	5 out of 8	7.52642	downregulated	1	3.86866	0.0209	downregulated	1	1.37627	0.2525	upregulated	1	0.985162	0.3734									upregulated	1	0.618885	0.5385	upregulated	2	1.20447	0.2999	upregulated	2	1.4433	0.2361
animal organ formation	GO	6 out of 8	7.50853	upregulated	3	4.26052	0.0141					downregulated	4	6.20184	0.002	downregulated	1	0.805829	0.4467	upregulated	1	0.922546	0.3975	upregulated	3	1.50589	0.2218	upregulated	5	1.13778	0.3205	upregulated	4	1.19518	0.3026
fatty acid binding	GO	4 out of 8	7.50233	upregulated	1	0.660789	0.5164	upregulated	3	2.90716	0.0546	downregulated	3	9.46492	7.8e-05	downregulated	2	4.48198	0.0113	upregulated	2	2.09123	0.1235	upregulated	2	2.36272	0.0942	upregulated	2	1.58747	0.2044	upregulated	4	1.46091	0.232
protein import	GO	5 out of 8	7.49163	upregulated	6	0.44144	0.6431	upregulated	8	2.32477	0.0978	downregulated	6	1.51084	0.2207	downregulated	7	5.16687	0.0057	downregulated	2	0.722674	0.4855	upregulated	13	1.1805	0.3071	upregulated	16	1.64698	0.1926	upregulated	10	1.47532	0.2287
glycerolipid metabolic process	GO	5 out of 8	7.46935	downregulated	7	3.3094	0.0365	downregulated	6	0.928732	0.3951	downregulated	29	8.29226	0.0003	downregulated	17	3.60253	0.0273	upregulated	6	1.63999	0.194	upregulated	30	0.99416	0.37	downregulated	27	0.986894	0.3727	downregulated	32	2.01857	0.1328
positive regulation of cell cycle G1/S phase transition	GO	5 out of 8	7.45834	downregulated	1	0.47758	0.6203	downregulated	1	2.05118	0.1286	upregulated	1	1.05914	0.3468	upregulated	1	1.1376	0.3206					upregulated	4	1.49332	0.2246	upregulated	2	0.926658	0.3959	upregulated	5	4.70634	0.009
establishment of endothelial intestinal barrier	GO	4 out of 8	7.44831					upregulated	2	1.68611	0.1852					downregulated	1	2.16044	0.1153					upregulated	4	2.89414	0.0553	upregulated	3	2.88479	0.0559	upregulated	3	1.19505	0.3027
oxidoreductase activity, acting on single donors with incorporation of molecular oxygen	GO	4 out of 8	7.44322	downregulated	1	3.8547	0.0212	upregulated	1	2.26145	0.1042	downregulated	2	2.21809	0.1088	downregulated	1	4.50037	0.0111					downregulated	1	0.248067	0.7803	downregulated	3	1.44848	0.2349	upregulated	2	0.828056	0.4369
cysteine-type endopeptidase activity involved in apoptotic process	GO	5 out of 8	7.44261	downregulated	1	1.67641	0.187	upregulated	1	0.874924	0.4169	upregulated	1	0.852954	0.4262	downregulated	1	1.87014	0.1541	upregulated	1	1.51642	0.2195	upregulated	1	2.65129	0.0706	upregulated	2	1.45622	0.2331
regulation of ventricular cardiac muscle cell action potential	GO	3 out of 8	7.43783					downregulated	1	4.775	0.0084	downregulated	3	3.92197	0.0198									upregulated	2	3.24468	0.039	downregulated	3	2.65282	0.0705	downregulated	2	1.85101	0.1571
morphogenesis of an epithelium	GO	4 out of 8	7.42894	upregulated	20	2.35578	0.0948	downregulated	8	2.98227	0.0507	downregulated	33	8.33405	0.0002	downregulated	17	5.30459	0.005	upregulated	9	2.46952	0.0846	upregulated	33	2.78214	0.0619	upregulated	40	1.09119	0.3358	upregulated	20	1.08609	0.3375
transcription coactivator activity	GO	3 out of 8	7.41662	downregulated	9	1.55888	0.2104	upregulated	10	0.996342	0.3692	upregulated	9	0.665598	0.514	downregulated	15	1.39826	0.247	upregulated	11	3.83097	0.0217	upregulated	26	3.90051	0.0202	upregulated	36	1.60157	0.2016	upregulated	32	1.91453	0.1474
regulation of lamellipodium morphogenesis	GO	4 out of 8	7.39573	downregulated	2	2.87471	0.0564					downregulated	3	3.04182	0.0477	downregulated	2	4.5381	0.0107	upregulated	1	2.45771	0.0856	downregulated	1	1.52549	0.2175	downregulated	1	1.62974	0.196	downregulated	1	2.36139	0.0943
chondrocyte proliferation	GO	5 out of 8	7.38583	downregulated	2	3.45025	0.0317	upregulated	1	3.45025	0.0317	upregulated	1	2.08503	0.1243					upregulated	1	2.47583	0.0841	upregulated	1	2.83343	0.0588	upregulated	1	2.42268	0.0887	upregulated	1	1.73893	0.1757
attachment of spindle microtubules to kinetochore	GO	5 out of 8	7.37996	upregulated	1	1.18482	0.3058	upregulated	2	1.94234	0.1434	downregulated	5	4.55279	0.0105	downregulated	2	2.89559	0.0553					upregulated	1	0.791989	0.4529	upregulated	2	0.942698	0.3896	upregulated	3	1.32405	0.2661
positive regulation of protein maturation	GO	6 out of 8	7.37759	downregulated	1	0.786226	0.4556	upregulated	3	4.27412	0.0139	downregulated	3	4.17162	0.0154	downregulated	2	5.68606	0.0034					upregulated	1	0.894634	0.4088	upregulated	1	0.0456373	0.9554	upregulated	1	0.0675438	0.9347
inflammasome complex	GO	3 out of 8	7.3775	downregulated	1	1.53335	0.2158					downregulated	2	1.94008	0.1437	downregulated	2	3.90407	0.0202
negative regulation of intrinsic apoptotic signaling pathway by p53 class mediator	GO	5 out of 8	7.3758	upregulated	3	2.25201	0.1052	upregulated	3	3.62434	0.0267	downregulated	1	2.60358	0.074	downregulated	3	6.37085	0.0017					upregulated	2	1.83668	0.1593	upregulated	2	0.557614	0.5726	upregulated	2	1.88341	0.1521
heterophilic cell-cell adhesion via plasma membrane cell adhesion molecules	GO	5 out of 8	7.37576	downregulated	3	2.83189	0.0589	downregulated	1	0.663068	0.5153	downregulated	4	4.79279	0.0083	downregulated	1	1.59888	0.2021	upregulated	1	0.700386	0.4964	downregulated	3	1.01751	0.3615	downregulated	4	1.33056	0.2643	downregulated	2	0.863193	0.4218
organelle disassembly	GO	4 out of 8	7.34478	upregulated	2	0.594905	0.5516	upregulated	1	0.107565	0.898	downregulated	4	1.26691	0.2817	downregulated	4	1.82065	0.1619	upregulated	1	0.674828	0.5092	upregulated	4	1.91254	0.1477	upregulated	4	3.63924	0.0263	downregulated	2	0.492061	0.6114
oligosaccharyltransferase complex	GO	5 out of 8	7.33897	upregulated	1	4.19681	0.015	upregulated	1	1.63549	0.1949					downregulated	1	1.36651	0.255	upregulated	2	3.59856	0.0274	upregulated	2	1.39062	0.2489	upregulated	2	1.7915	0.1667	upregulated	4	5.02408	0.0066
oxidoreductase activity, acting on CH-OH group of donors	GO	3 out of 8	7.30243	downregulated	3	2.10254	0.1221	upregulated	6	2.35215	0.0952	upregulated	3	2.10079	0.1224	downregulated	10	6.63515	0.0013	downregulated	1	0.309788	0.7336	upregulated	3	0.158156	0.8537	downregulated	7	0.573462	0.5636	upregulated	6	1.80013	0.1653
epithelial cell proliferation	GO	3 out of 8	7.29649	upregulated	5	2.37148	0.0933	downregulated	1	0.745154	0.4747	downregulated	9	6.21153	0.002	downregulated	5	4.83988	0.0079	downregulated	3	0.520254	0.5944	downregulated	4	0.696698	0.4982	downregulated	7	0.699891	0.4966	downregulated	4	0.211746	0.8092
mitotic spindle midzone	GO	4 out of 8	7.2924	upregulated	1	1.18687	0.3052					downregulated	4	4.66393	0.0094	downregulated	2	2.28216	0.1021					upregulated	1	1.08906	0.3365	upregulated	1	0.444125	0.6414
positive regulation of cell cycle phase transition	GO	5 out of 8	7.29124	upregulated	2	0.211873	0.8091	upregulated	3	1.1051	0.3312	downregulated	5	1.02865	0.3575	downregulated	3	1.22445	0.2939	downregulated	1	0.0470739	0.954	upregulated	7	1.21027	0.2981	upregulated	7	1.26992	0.2809	upregulated	11	3.92199	0.0198
carbohydrate catabolic process	GO	5 out of 8	7.24153	downregulated	2	0.728861	0.4825	downregulated	1	0.932333	0.3936	downregulated	7	1.08514	0.3379	downregulated	7	4.40855	0.0122	downregulated	1	0.0675987	0.9346	downregulated	7	0.67479	0.5093	downregulated	6	0.184913	0.8312	upregulated	2	1.01395	0.3628
heme metabolic process	GO	4 out of 8	7.23154	upregulated	1	1.10419	0.3315	upregulated	2	1.98431	0.1375	downregulated	3	2.62736	0.0723	upregulated	1	2.05697	0.1278					upregulated	3	1.0289	0.3574	upregulated	4	3.56031	0.0284	upregulated	5	5.16044	0.0057
phosphatase activator activity	GO	5 out of 8	7.21964	downregulated	1	1.76773	0.1707	upregulated	1	0.963407	0.3816	downregulated	1	1.39016	0.249	downregulated	1	4.978	0.0069					upregulated	1	0.3846	0.6807	upregulated	2	0.551624	0.576	upregulated	2	0.501093	0.6059
response to nutrient levels	GO	5 out of 8	7.21601	downregulated	9	4.04072	0.0176	upregulated	17	6.11429	0.0022	upregulated	21	4.51427	0.011	downregulated	26	10.3667	3.1e-05	downregulated	18	1.3902	0.249	upregulated	22	1.53252	0.216	upregulated	26	1.97103	0.1393	upregulated	33	1.32381	0.2661
positive regulation of G1/S transition of mitotic cell cycle	GO	5 out of 8	7.21138	downregulated	1	0.581792	0.5589	downregulated	1	2.29813	0.1004	upregulated	1	1.19647	0.3023	upregulated	1	1.27759	0.2787					upregulated	3	1.87083	0.154	upregulated	1	0.746593	0.474	upregulated	4	4.1881	0.0152
signaling adaptor activity	GO	6 out of 8	7.20915	upregulated	4	2.28876	0.1014	upregulated	2	0.361599	0.6966	downregulated	8	3.79447	0.0225	downregulated	3	0.463561	0.629	upregulated	1	1.82922	0.1605	upregulated	5	1.19827	0.3017	upregulated	8	1.37488	0.2529	upregulated	4	1.19909	0.3015
transcriptional repressor activity, RNA polymerase II distal enhancer sequence-specific binding	GO	5 out of 8	7.20502					downregulated	1	4.71801	0.0089	upregulated	2	3.82248	0.0219	downregulated	1	1.62263	0.1974					upregulated	1	1.47759	0.2282	upregulated	2	2.32841	0.0975	upregulated	1	0.880862	0.4144
isomerase activity	GO	5 out of 8	7.20244	downregulated	2	2.23283	0.1072	upregulated	5	2.44386	0.0868	downregulated	6	1.69035	0.1845	downregulated	6	2.44307	0.0869	downregulated	1	0.295354	0.7443	upregulated	2	1.7254	0.1781	upregulated	7	1.7254	0.1781	upregulated	5	1.81496	0.1628
vascular smooth muscle cell differentiation	GO	5 out of 8	7.14938	downregulated	2	4.54274	0.0106	upregulated	1	1.73587	0.1762	downregulated	1	0.426992	0.6525									upregulated	1	1.14687	0.3176	upregulated	1	1.31772	0.2677	upregulated	2	1.45092	0.2344
isoprenoid biosynthetic process	GO	5 out of 8	7.12569					upregulated	2	4.39283	0.0124	downregulated	1	2.14353	0.1172	downregulated	2	3.63804	0.0263	upregulated	1	1.95558	0.1415	upregulated	1	3.12893	0.0438	upregulated	1	1.01437	0.3626	downregulated	1	0.36193	0.6963
actin polymerization or depolymerization	GO	5 out of 8	7.07943	upregulated	2	1.70952	0.181	downregulated	2	5.12769	0.0059	downregulated	4	1.47605	0.2285	downregulated	1	0.606787	0.5451	upregulated	1	1.6116	0.1996	upregulated	2	0.789632	0.454	downregulated	1	0.274296	0.7601	downregulated	3	0.548514	0.5778
regulation of transcription from RNA polymerase II promoter in response to hypoxia	GO	4 out of 8	7.07468	downregulated	2	3.24886	0.0388	upregulated	1	1.94973	0.1423	downregulated	4	2.53861	0.079	downregulated	4	3.15309	0.0427	downregulated	1	0.83677	0.4331	downregulated	2	1.86048	0.1556	downregulated	2	0.296844	0.7432	upregulated	6	3.07793	0.0461
determination of adult lifespan	GO	3 out of 8	7.07008									downregulated	4	7.47737	0.0006	downregulated	1	1.56132	0.2099	downregulated	1	1.21034	0.2981	downregulated	1	0.867853	0.4199	downregulated	1	0.390913	0.6764	upregulated	1	0.500502	0.6062
regulation of cell junction assembly	GO	3 out of 8	7.04975	downregulated	2	2.4352	0.0876	upregulated	4	1.57022	0.208	downregulated	13	8.44395	0.0002	downregulated	8	4.14315	0.0159	downregulated	2	1.12626	0.3242	downregulated	5	1.1219	0.3257	downregulated	7	2.13222	0.1186	downregulated	4	2.02193	0.1324
T cell mediated cytotoxicity	GO	4 out of 8	7.00252	downregulated	1	1.65786	0.1905					upregulated	1	0.837575	0.4328	upregulated	1	2.96918	0.0513	upregulated	1	1.25599	0.2848	upregulated	2	1.59725	0.2025	upregulated	3	1.83121	0.1602	upregulated	3	2.31807	0.0985
carbohydrate derivative transport	GO	4 out of 8	7.00198	downregulated	2	1.12191	0.3257	downregulated	2	2.78228	0.0619	downregulated	5	2.77562	0.0623	downregulated	4	3.58376	0.0278	downregulated	1	0.688948	0.5021	downregulated	2	0.777981	0.4593	downregulated	4	1.19603	0.3024	downregulated	3	0.598624	0.5496
response to redox state	GO	3 out of 8	6.97252					downregulated	1	4.99735	0.0068	downregulated	2	3.46423	0.0313									downregulated	1	1.16702	0.3113	downregulated	1	0.768677	0.4636	upregulated	1	0.446647	0.6398
positive regulation of epithelial cell apoptotic process	GO	6 out of 8	6.9691	upregulated	1	2.75102	0.0639	downregulated	1	1.6154	0.1988	downregulated	4	3.04357	0.0477	downregulated	3	2.19389	0.1115					upregulated	2	1.30713	0.2706	upregulated	4	1.08545	0.3378	upregulated	2	0.474689	0.6221
ribonucleoprotein granule	GO	5 out of 8	6.9676	upregulated	9	1.10205	0.3322	downregulated	3	2.20475	0.1103	downregulated	19	2.21589	0.1091	downregulated	12	2.68559	0.0682	downregulated	10	1.84701	0.1577	downregulated	14	1.49323	0.2246	upregulated	27	2.88158	0.056	upregulated	25	1.42207	0.2412
erythrocyte maturation	GO	3 out of 8	6.91708	downregulated	1	3.88427	0.0206					downregulated	1	1.44014	0.2369	downregulated	1	2.15708	0.1157													downregulated	1	0.564405	0.5687
adaptive thermogenesis	GO	3 out of 8	6.90834	downregulated	1	1.13213	0.3223					downregulated	5	5.65719	0.0035					downregulated	1	1.15563	0.3149	upregulated	2	3.38803	0.0338	downregulated	1	2.07639	0.1254	downregulated	1	2.11338	0.1208
lipid digestion	GO	2 out of 8	6.89761									upregulated	1	2.80159	0.0607	downregulated	2	4.00095	0.0183									upregulated	1	5.69826	0.0034
cysteine-type endopeptidase regulator activity involved in apoptotic process	GO	5 out of 8	6.88162	downregulated	2	1.46938	0.2301					upregulated	2	3.0197	0.0488	downregulated	4	3.44045	0.0321	downregulated	2	1.81069	0.1635	upregulated	1	1.12807	0.3237	upregulated	2	1.20664	0.2992	upregulated	3	2.65678	0.0702
RNA polymerase II complex binding	GO	5 out of 8	6.83508	upregulated	2	1.23772	0.29					downregulated	4	1.25117	0.2862	downregulated	2	1.2856	0.2765					upregulated	6	2.57156	0.0764	upregulated	6	2.17749	0.1133	upregulated	4	0.786982	0.4552
regulation of double-strand break repair via nonhomologous end joining	GO	5 out of 8	6.81366					upregulated	1	0.747067	0.4738	upregulated	1	1.24784	0.2871	downregulated	1	0.917126	0.3997	upregulated	1	1.69098	0.1843	upregulated	2	1.96941	0.1395	upregulated	2	3.0994	0.0451	upregulated	1	1.13166	0.3225
extracellular matrix structural constituent conferring tensile strength	GO	4 out of 8	6.81269					downregulated	1	1.72278	0.1786	downregulated	3	2.46395	0.0851									upregulated	1	1.29833	0.273	upregulated	2	1.46402	0.2313	downregulated	1	0.136386	0.8725
endoplasmic reticulum lumen	GO	4 out of 8	6.79934	downregulated	10	4.26955	0.014	upregulated	8	1.36645	0.255	downregulated	21	4.33368	0.0131	downregulated	14	8.37465	0.0002	upregulated	2	0.0970837	0.9075	upregulated	13	2.87661	0.0563	upregulated	15	3.77568	0.0229	upregulated	16	0.0499624	0.9513
vacuolar transport	GO	3 out of 8	6.78934	upregulated	8	3.2461	0.0389	upregulated	7	1.75907	0.1722	upregulated	8	4.96023	0.007	downregulated	13	8.9963	0.0001	downregulated	6	2.78303	0.0619	downregulated	10	4.23082	0.0145	upregulated	21	3.75421	0.0234	upregulated	15	3.54118	0.029
nuclear inner membrane	GO	4 out of 8	6.78228	upregulated	3	0.977608	0.3762	upregulated	3	1.98119	0.1379	downregulated	4	2.68043	0.0685	downregulated	2	1.55495	0.2112	upregulated	1	2.14576	0.117	upregulated	3	1.88941	0.1512	upregulated	3	1.0177	0.3614	upregulated	3	1.72941	0.1774
lamellipodium	GO	4 out of 8	6.71105	downregulated	7	4.67668	0.0093	upregulated	8	1.45963	0.2323	downregulated	19	2.9251	0.0537	downregulated	16	7.84176	0.0004	upregulated	6	2.08073	0.1248	downregulated	16	4.18463	0.0152	downregulated	14	3.42011	0.0327	downregulated	14	1.74884	0.174
establishment of protein localization to endoplasmic reticulum	GO	3 out of 8	6.70739	upregulated	3	0.0736638	0.929	downregulated	1	2.36038	0.0944	upregulated	2	0.200435	0.8184	upregulated	1	1.15826	0.314	downregulated	1	0.311328	0.7325	downregulated	4	0.160496	0.8517	upregulated	17	1.87976	0.1526	upregulated	18	4.37142	0.0126
regulation of T cell migration	GO	4 out of 8	6.70239									downregulated	4	2.1453	0.117	downregulated	3	3.74649	0.0236					upregulated	1	0.396895	0.6724	upregulated	3	1.73649	0.1761	downregulated	3	1.32278	0.2664
regulation of nucleocytoplasmic transport	GO	6 out of 8	6.69781	upregulated	5	1.20016	0.3011	upregulated	6	2.60057	0.0742	downregulated	7	0.918035	0.3993	downregulated	7	1.79677	0.1658	upregulated	3	0.921816	0.3978	upregulated	10	1.55334	0.2115	upregulated	14	3.21247	0.0403	upregulated	12	2.0961	0.1229
cell-cell adhesion	GO	2 out of 8	6.6931	upregulated	17	6.62145	0.0013	upregulated	13	4.48835	0.0112	downregulated	37	19.3749	3.9e-09	downregulated	19	10.4808	2.8e-05	downregulated	13	1.40163	0.2462	downregulated	38	3.76695	0.0231	downregulated	41	4.39866	0.0123	downregulated	23	2.48556	0.0833
oxygen transport	GO	2 out of 8	6.6841	downregulated	1	1.90087	0.1494					downregulated	1	5.59556	0.0037									downregulated	1	0.812323	0.4438
cell-cell recognition	GO	5 out of 8	6.68208	downregulated	3	2.00187	0.1351	upregulated	1	1.76453	0.1713	downregulated	3	2.64535	0.071	downregulated	1	2.72111	0.0658	downregulated	1	0.244068	0.7834	upregulated	4	0.659395	0.5172	upregulated	3	1.23099	0.292	downregulated	4	0.568039	0.5666
nuclear membrane	GO	4 out of 8	6.64927	upregulated	18	1.96268	0.1405	upregulated	13	3.81862	0.022	downregulated	27	5.62857	0.0036	downregulated	15	5.64009	0.0036	upregulated	5	2.18353	0.1126	downregulated	19	0.657086	0.5184	upregulated	24	0.248558	0.7799	downregulated	20	0.613096	0.5417
regulation of interleukin-8 secretion	GO	2 out of 8	6.62796					upregulated	1	2.34565	0.0958	downregulated	2	1.29294	0.2745	downregulated	3	7.68067	0.0005
ciliary transition fiber	GO	4 out of 8	6.6137	upregulated	1	1.83137	0.1602					upregulated	1	1.36295	0.2559	downregulated	2	2.43436	0.0877					upregulated	2	1.5909	0.2037	upregulated	3	3.92782	0.0197	upregulated	2	1.85494	0.1565
protein binding, bridging	GO	6 out of 8	6.60873	downregulated	6	1.20744	0.299	upregulated	8	4.57618	0.0103	downregulated	11	2.35022	0.0953	upregulated	2	1.30043	0.2724	upregulated	3	1.38426	0.2505	upregulated	10	2.33209	0.0971	upregulated	15	1.90657	0.1486	upregulated	8	3.30475	0.0367
positive regulation of neural precursor cell proliferation	GO	5 out of 8	6.54418	upregulated	2	3.47942	0.0308	upregulated	2	3.13946	0.0433	downregulated	2	3.96502	0.019	upregulated	1	1.48037	0.2276	upregulated	2	2.34296	0.096	upregulated	5	2.83568	0.0587	upregulated	5	2.29209	0.1011	upregulated	2	3.20769	0.0405
positive regulation of mitochondrial outer membrane permeabilization involved in apoptotic signaling pathway	GO	6 out of 8	6.52061	downregulated	3	2.88359	0.0559	downregulated	1	1.14754	0.3174	downregulated	4	2.5308	0.0796	downregulated	1	0.5116	0.5995	upregulated	1	2.22112	0.1085	downregulated	2	1.7924	0.1666	downregulated	2	1.36569	0.2552	upregulated	2	0.384055	0.6811
post-embryonic animal morphogenesis	GO	4 out of 8	6.4995													downregulated	1	0.639619	0.5275					upregulated	2	1.46528	0.231	upregulated	2	3.016	0.049	upregulated	2	1.3786	0.2519
heart development	GO	6 out of 8	6.49583	upregulated	31	5.79126	0.0031	downregulated	8	2.42716	0.0883	downregulated	30	4.71577	0.009	upregulated	6	2.58398	0.0755	upregulated	13	2.78062	0.062	upregulated	45	2.94374	0.0527	upregulated	49	1.47708	0.2283	upregulated	31	0.526703	0.5905
regulation of autophagy of mitochondrion	GO	5 out of 8	6.48413	downregulated	1	0.748042	0.4733	upregulated	1	0.25391	0.7758	downregulated	4	2.46626	0.0849	downregulated	4	3.37665	0.0342					downregulated	2	0.977389	0.3763	upregulated	1	0.154007	0.8573	upregulated	3	0.970479	0.3789
MLL1/2 complex	GO	5 out of 8	6.45617	upregulated	2	0.973401	0.3778					downregulated	2	0.541042	0.5821	downregulated	3	2.42113	0.0888					upregulated	2	1.16893	0.3107	upregulated	3	1.38741	0.2497	upregulated	4	1.91106	0.1479
regulation of adherens junction organization	GO	4 out of 8	6.45575	downregulated	2	2.89262	0.0554	downregulated	1	1.24374	0.2883	downregulated	9	5.79485	0.003	downregulated	6	3.52376	0.0295	downregulated	2	1.52497	0.2176	downregulated	4	1.36243	0.256	downregulated	5	2.40361	0.0904	downregulated	3	1.70822	0.1812
post-Golgi vesicle-mediated transport	GO	5 out of 8	6.44879	upregulated	7	2.84267	0.0583	downregulated	2	0.958751	0.3834	upregulated	3	1.22936	0.2925	downregulated	8	4.83974	0.0079	upregulated	4	3.62607	0.0266	downregulated	9	4.64355	0.0096	upregulated	15	3.14808	0.0429	upregulated	13	2.59173	0.0749
cellular response to nutrient levels	GO	4 out of 8	6.44605	downregulated	4	3.91909	0.0199	upregulated	6	4.29011	0.0137	downregulated	16	3.82422	0.0218	downregulated	14	7.62109	0.0005	downregulated	10	2.16091	0.1152	downregulated	14	2.59962	0.0743	downregulated	15	1.7122	0.1805	upregulated	20	1.84449	0.1581
regulation of multicellular organism growth	GO	5 out of 8	6.42885	downregulated	4	2.20699	0.11	downregulated	1	0.399332	0.6708	upregulated	3	1.04486	0.3517					downregulated	2	0.536511	0.5848	upregulated	8	1.88728	0.1515	upregulated	8	1.06309	0.3454	upregulated	6	2.45353	0.086
positive regulation of cysteine-type endopeptidase activity involved in apoptotic signaling pathway	GO	2 out of 8	6.40936	upregulated	1	0.906817	0.4038					downregulated	3	6.15784	0.0021	downregulated	1	1.15834	0.314
oxygen binding	GO	2 out of 8	6.38557	downregulated	2	2.31158	0.0991					downregulated	1	4.68171	0.0093									downregulated	1	0.152369	0.8587	downregulated	1	0.10774	0.8979	downregulated	1	0.347603	0.7064
extracellular matrix	GO	5 out of 8	6.38176	downregulated	14	3.33402	0.0356	upregulated	9	1.66654	0.1889	downregulated	18	3.37869	0.0341	upregulated	1	0.399518	0.6706	downregulated	5	0.887743	0.4116	upregulated	26	1.32343	0.2662	upregulated	22	0.980086	0.3753	upregulated	15	0.319345	0.7266
negative regulation of epithelial cell apoptotic process	GO	6 out of 8	6.37468	downregulated	1	0.479945	0.6188	upregulated	2	0.930471	0.3944	downregulated	2	0.402024	0.669	downregulated	3	3.46657	0.0312	upregulated	1	0.860472	0.423	upregulated	3	1.89805	0.1499	upregulated	2	0.80953	0.4451	downregulated	1	0.611438	0.5426
ceramide transporter activity	GO	4 out of 8	6.34593	upregulated	1	1.03425	0.3555					downregulated	1	2.9109	0.0544	downregulated	1	1.94767	0.1426	upregulated	1	1.86907	0.1543	upregulated	2	2.07492	0.1256	downregulated	1	0.670208	0.5116	downregulated	1	0.752171	0.4713
regulation of embryonic development	GO	6 out of 8	6.33834	upregulated	8	2.5924	0.0748	upregulated	3	2.54277	0.0786	downregulated	12	2.94307	0.0527	downregulated	2	1.88963	0.1511	upregulated	6	2.89529	0.0553	upregulated	12	1.62221	0.1975	upregulated	16	1.28935	0.2754	upregulated	8	0.833948	0.4343
promoter-specific chromatin binding	GO	4 out of 8	6.30948	downregulated	1	1.2069	0.2991					downregulated	6	3.51345	0.0298	downregulated	3	2.97432	0.0511	downregulated	1	0.382252	0.6823	downregulated	2	1.67983	0.1864	upregulated	6	0.855059	0.4253	downregulated	1	0.178161	0.8368
condensed chromosome kinetochore	GO	4 out of 8	6.27792	upregulated	11	7.23603	0.0007	upregulated	16	17.4649	2.6e-08	downregulated	12	5.20668	0.0055	downregulated	5	2.55797	0.0775	upregulated	1	0.502297	0.6051	upregulated	8	1.61286	0.1993	upregulated	10	2.26502	0.1038	upregulated	8	1.89774	0.1499
cerebellar Purkinje cell layer development	GO	3 out of 8	6.2475									downregulated	3	2.66928	0.0693					upregulated	2	3.62379	0.0267	upregulated	3	2.53441	0.0793	downregulated	1	2.57998	0.0758	downregulated	1	2.22791	0.1078
cellular senescence	GO	6 out of 8	6.2084	downregulated	1	0.771086	0.4625	upregulated	1	0.267995	0.7649	downregulated	1	0.137417	0.8716					upregulated	1	1.95628	0.1414	upregulated	2	1.29162	0.2748	upregulated	4	1.89967	0.1496	upregulated	1	0.420322	0.6568
regulation of myoblast proliferation	GO	3 out of 8	6.19558					downregulated	1	2.75485	0.0636	downregulated	1	2.16113	0.1152	downregulated	1	2.40584	0.0902													downregulated	1	1.12624	0.3243
temperature homeostasis	GO	3 out of 8	6.18073	upregulated	1	3.42812	0.0324	upregulated	2	2.54639	0.0784	downregulated	4	2.38242	0.0923					upregulated	1	3.69724	0.0248	upregulated	2	1.37149	0.2537	upregulated	2	2.6933	0.0677	downregulated	1	1.5813	0.2057
regulation of intrinsic apoptotic signaling pathway by p53 class mediator	GO	5 out of 8	6.16604	upregulated	3	1.94147	0.1435	upregulated	3	3.48434	0.0307	downregulated	1	2.36299	0.0941	downregulated	3	5.86856	0.0028					upregulated	2	1.45157	0.2342	upregulated	2	0.413923	0.6611	upregulated	2	1.4948	0.2243
molecular adaptor activity	GO	6 out of 8	6.14932	downregulated	7	1.33395	0.2634	upregulated	8	4.11799	0.0163	downregulated	13	2.65806	0.0701	upregulated	2	1.18463	0.3059	upregulated	3	1.09834	0.3334	upregulated	13	2.20109	0.1107	upregulated	18	1.50538	0.2219	upregulated	10	2.65511	0.0703
hepatocyte apoptotic process	GO	4 out of 8	6.14254					upregulated	1	1.07838	0.3401	downregulated	3	2.93777	0.053	downregulated	2	3.01097	0.0492									upregulated	2	0.737399	0.4784	upregulated	1	0.534779	0.5858
negative regulation of intrinsic apoptotic signaling pathway	GO	5 out of 8	6.12951	upregulated	7	1.72769	0.1777	upregulated	3	2.26859	0.1035	downregulated	3	2.01004	0.134	downregulated	6	5.55255	0.0039	downregulated	2	0.412037	0.6623	upregulated	4	0.854475	0.4255	upregulated	5	1.48114	0.2274	upregulated	6	0.639614	0.5275
regulation of mitochondrial outer membrane permeabilization involved in apoptotic signaling pathway	GO	6 out of 8	6.12827	downregulated	3	2.50738	0.0815	downregulated	1	1.01902	0.3609	downregulated	4	2.37864	0.0927	downregulated	1	0.41849	0.658	upregulated	1	2.09549	0.123	downregulated	2	1.44951	0.2347	downregulated	2	1.1293	0.3233	upregulated	2	0.288062	0.7497
IkappaB kinase complex	GO	4 out of 8	6.07347					upregulated	1	1.1751	0.3088	downregulated	2	2.89908	0.0551	downregulated	2	2.58897	0.0751					downregulated	1	0.550983	0.5764	upregulated	1	0.787948	0.4548	upregulated	1	1.52356	0.2179
microvillus	GO	4 out of 8	6.06663	downregulated	2	3.69967	0.0247	upregulated	2	1.24111	0.2891	downregulated	10	6.01307	0.0024	downregulated	7	9.59909	6.8e-05	upregulated	2	1.29305	0.2744	upregulated	5	1.17966	0.3074	upregulated	4	1.5235	0.2179	upregulated	3	2.07043	0.1261
cell recognition	GO	4 out of 8	6.02961	downregulated	7	2.6108	0.0735	upregulated	1	0.878474	0.4154	downregulated	8	2.4542	0.0859	downregulated	4	2.60134	0.0742	downregulated	4	0.808008	0.4457	downregulated	10	2.57484	0.0762	upregulated	6	3.13807	0.0434	downregulated	12	0.513479	0.5984
transmembrane receptor protein tyrosine kinase adaptor activity	GO	3 out of 8	6.01081	upregulated	1	1.95865	0.141					upregulated	1	1.55864	0.2104									upregulated	1	0.960569	0.3827	upregulated	1	1.82147	0.1618	upregulated	1	3.22877	0.0396
positive regulation of autophagy of mitochondrion	GO	4 out of 8	6.01077	downregulated	1	1.42045	0.2416					downregulated	3	3.30806	0.0366	downregulated	1	0.91968	0.3986													upregulated	1	0.362578	0.6959
ceramide transport	GO	4 out of 8	6.00367	upregulated	1	0.94522	0.3886					downregulated	1	2.73409	0.065	downregulated	1	1.8433	0.1583	upregulated	1	1.75229	0.1734	upregulated	2	1.86714	0.1546	downregulated	1	0.58504	0.5571	downregulated	1	0.66288	0.5154
omega-hydroxylase P450 pathway	GO	3 out of 8	5.93943																					upregulated	1	1.40341	0.2458	upregulated	1	2.25399	0.105	upregulated	1	2.28203	0.1021
positive regulation of actin cytoskeleton reorganization	GO	2 out of 8	5.8828	downregulated	1	2.52353	0.0802	downregulated	1	4.75278	0.0086	upregulated	1	1.39351	0.2482
regulation of extrinsic apoptotic signaling pathway	GO	5 out of 8	5.85463	upregulated	6	1.18027	0.3072	upregulated	9	8.95251	0.0001	upregulated	5	1.30819	0.2703	downregulated	10	2.13265	0.1185	upregulated	4	2.61722	0.073	upregulated	12	4.75464	0.0086	upregulated	16	4.42467	0.012	upregulated	8	3.36642	0.0345
regulation of chloride transport	GO	3 out of 8	5.85376	downregulated	1	1.62427	0.1971					downregulated	1	1.84747	0.1576	downregulated	1	2.38202	0.0924
cysteine-type endopeptidase inhibitor activity involved in apoptotic process	GO	4 out of 8	5.83748	upregulated	2	1.10745	0.3304					downregulated	1	0.819556	0.4406	downregulated	2	1.96068	0.1408	downregulated	2	2.76502	0.063	upregulated	1	1.64729	0.1926	upregulated	1	0.925937	0.3962	upregulated	2	3.23875	0.0392
regulation of protein depolymerization	GO	5 out of 8	5.81994	downregulated	3	1.43857	0.2373	upregulated	7	2.948	0.0524	upregulated	6	2.65586	0.0702	downregulated	4	5.95584	0.0026	upregulated	1	1.33897	0.2621	downregulated	8	1.21151	0.2977	upregulated	8	1.08693	0.3372	upregulated	8	2.815	0.0599
protein localization to lysosome	GO	6 out of 8	5.81055	upregulated	3	3.7252	0.0241	upregulated	2	2.96117	0.0518	downregulated	4	2.90865	0.0545	downregulated	3	3.11913	0.0442	upregulated	1	0.679562	0.5068	upregulated	4	1.79094	0.1668	upregulated	7	2.15359	0.1161	upregulated	4	1.84505	0.158
positive regulation of STAT cascade	GO	5 out of 8	5.81053	downregulated	3	2.60165	0.0742	downregulated	1	2.68551	0.0682	upregulated	1	0.660543	0.5166	downregulated	3	0.755997	0.4695					upregulated	6	0.827787	0.437	upregulated	4	0.847688	0.4284	downregulated	3	1.24755	0.2872
isoprenoid metabolic process	GO	7 out of 8	5.78367	downregulated	1	1.25428	0.2853	upregulated	8	5.67352	0.0034	downregulated	4	3.09501	0.0453	downregulated	4	1.88938	0.1512	upregulated	1	0.727924	0.4829	upregulated	4	1.73776	0.1759	upregulated	4	0.288669	0.7493	upregulated	5	2.46417	0.0851
negative regulation of anoikis	GO	5 out of 8	5.78007	downregulated	2	2.15066	0.1164	upregulated	2	3.5783	0.0279	upregulated	2	1.91299	0.1476	downregulated	1	0.522829	0.5928	downregulated	1	0.880123	0.4147	upregulated	1	3.44355	0.032	upregulated	1	3.58979	0.0276	upregulated	1	2.44465	0.0868
pyrimidine-containing compound transmembrane transport	GO	1 out of 8	5.75958																													upregulated	2	5.75958	0.0032
lipopolysaccharide binding	GO	4 out of 8	5.74974	downregulated	1	1.20335	0.3002	upregulated	1	3.09447	0.0453	downregulated	4	5.49964	0.0041	downregulated	5	8.96776	0.0001	upregulated	1	2.76619	0.0629	upregulated	2	1.86792	0.1544	upregulated	1	0.314728	0.73	upregulated	2	0.800896	0.4489
neuropilin binding	GO	3 out of 8	5.74109	upregulated	1	1.74968	0.1738	upregulated	1	3.09808	0.0451	downregulated	5	8.70806	0.0002	downregulated	1	1.06907	0.3433					upregulated	2	1.22711	0.2931	downregulated	1	0.415386	0.6601
SH3/SH2 adaptor activity	GO	4 out of 8	5.72663	upregulated	2	1.65175	0.1917	upregulated	2	0.61461	0.5409	downregulated	5	2.43872	0.0873	downregulated	2	0.72655	0.4836	upregulated	1	2.23817	0.1067	upregulated	1	1.57688	0.2066	upregulated	4	1.23796	0.29	upregulated	1	0.673637	0.5099
MLL3/4 complex	GO	4 out of 8	5.71549	upregulated	1	0.960393	0.3827					downregulated	1	0.470395	0.6248									upregulated	1	1.6599	0.1902	upregulated	2	2.42007	0.0889	upregulated	1	2.12552	0.1194
neural tube closure	GO	3 out of 8	5.70389	upregulated	2	0.952077	0.3859	upregulated	1	3.05684	0.047	downregulated	8	4.46053	0.0116	downregulated	2	0.431452	0.6496	upregulated	2	2.27828	0.1025	upregulated	8	3.1759	0.0418	upregulated	9	1.56642	0.2088	downregulated	6	1.31671	0.268
G-rich strand telomeric DNA binding	GO	5 out of 8	5.70032	upregulated	3	3.84764	0.0213	upregulated	1	2.75134	0.0638	downregulated	2	4.00858	0.0182	downregulated	2	3.64548	0.0261					upregulated	1	2.02453	0.1321	upregulated	1	1.9822	0.1378	upregulated	1	0.638507	0.5281
cell maturation	GO	3 out of 8	5.69434	downregulated	4	3.66704	0.0256	upregulated	1	3.7497	0.0235	downregulated	17	6.18724	0.0021	downregulated	9	6.13573	0.0022	downregulated	2	2.26437	0.1039	downregulated	6	0.96587	0.3807	downregulated	9	1.70208	0.1823	downregulated	10	1.61365	0.1992
cytokine secretion	GO	4 out of 8	5.69359	downregulated	1	0.420996	0.6564	upregulated	1	2.86557	0.057	downregulated	4	2.53302	0.0794	downregulated	5	6.45072	0.0016	downregulated	1	1.72485	0.1782	downregulated	1	1.53387	0.2157	upregulated	2	4.34645	0.013	downregulated	1	1.93331	0.1447
male sex determination	GO	4 out of 8	5.6902									downregulated	1	1.89556	0.1502	downregulated	1	1.75044	0.1737									upregulated	2	1.03335	0.3558	upregulated	2	1.01085	0.3639
phosphatidylinositol-3,5-bisphosphate 3-phosphatase activity	GO	5 out of 8	5.66758	upregulated	1	0.890173	0.4106					downregulated	2	3.30216	0.0368	downregulated	1	1.12759	0.3238					upregulated	1	0.66085	0.5164	upregulated	1	0.334286	0.7158	upregulated	2	1.13286	0.3221
regulation of bicellular tight junction assembly	GO	5 out of 8	5.64416					upregulated	1	0.629185	0.533	downregulated	3	3.76148	0.0232	downregulated	1	1.02602	0.3584	upregulated	1	1.00799	0.365	upregulated	1	0.127147	0.8806	upregulated	2	0.350704	0.7042
DNA repair complex	GO	5 out of 8	5.64101	upregulated	1	0.472687	0.6233	upregulated	3	3.30841	0.0366	downregulated	6	5.78214	0.0031	downregulated	3	2.6025	0.0741					upregulated	1	0.0178298	0.9823	upregulated	3	0.349041	0.7054	upregulated	3	0.670602	0.5114
beta-catenin-TCF complex	GO	4 out of 8	5.63746	downregulated	1	1.07196	0.3423	upregulated	1	0.906972	0.4037	upregulated	1	1.1345	0.3216					upregulated	1	1.80669	0.1642	upregulated	4	3.72554	0.0241	upregulated	4	2.78411	0.0618	downregulated	2	1.70936	0.181
nucleoside phosphate catabolic process	GO	4 out of 8	5.63666	upregulated	1	1.04845	0.3505	downregulated	2	0.84596	0.4291	downregulated	5	2.45465	0.0859	upregulated	2	1.17929	0.3075	downregulated	2	1.50858	0.2212	upregulated	4	1.97346	0.139	upregulated	6	2.05444	0.1282	upregulated	7	4.0989	0.0166
adenohypophysis development	GO	4 out of 8	5.62225													upregulated	1	2.40584	0.0902	upregulated	1	2.14256	0.1174	upregulated	1	2.00445	0.1347	upregulated	1	1.86908	0.1543	upregulated	1	2.012	0.1337
execution phase of apoptosis	GO	6 out of 8	5.61958	upregulated	3	1.15111	0.3163	upregulated	3	2.86257	0.0571	downregulated	5	2.24834	0.1056	downregulated	1	0.197854	0.8205	upregulated	2	2.70709	0.0667	upregulated	5	1.01549	0.3622	upregulated	5	1.1287	0.3235	upregulated	3	2.33579	0.0967
structural constituent of cytoskeleton	GO	3 out of 8	5.59917	downregulated	1	0.907895	0.4034	upregulated	1	1.61721	0.1985	upregulated	2	1.66517	0.1892	upregulated	3	4.32265	0.0133	upregulated	3	2.76224	0.0632	upregulated	6	2.69422	0.0676	upregulated	8	1.65465	0.1912	downregulated	5	1.51193	0.2205
transcription factor activity, direct ligand regulated sequence-specific DNA binding	GO	7 out of 8	5.59917	downregulated	3	1.73583	0.1763	downregulated	2	2.14088	0.1176	downregulated	2	0.0724494	0.9301	upregulated	2	3.68353	0.0251	upregulated	1	0.362775	0.6957	upregulated	4	0.841853	0.4309	upregulated	5	0.74233	0.476	upregulated	3	3.38658	0.0338
positive regulation of endothelial cell apoptotic process	GO	6 out of 8	5.52131	upregulated	1	3.2697	0.038	downregulated	1	2.10318	0.1221	downregulated	1	1.62976	0.196	downregulated	1	0.696809	0.4982					upregulated	1	1.72569	0.1781	upregulated	3	1.48751	0.2259	upregulated	2	1.14806	0.3173
methyl-CpG binding	GO	3 out of 8	5.5039	upregulated	1	0.463097	0.6293					upregulated	1	1.14594	0.3179									upregulated	2	1.55348	0.2115	upregulated	4	3.32326	0.036	upregulated	3	2.2362	0.1069
cellular component disassembly involved in execution phase of apoptosis	GO	6 out of 8	5.48979	upregulated	2	1.68712	0.1851	upregulated	2	3.65786	0.0258	downregulated	5	3.23562	0.0393	downregulated	1	0.505484	0.6032	upregulated	2	3.80402	0.0223	upregulated	3	1.28103	0.2778	upregulated	2	1.07545	0.3411	upregulated	1	0.933174	0.3933
atrial cardiac muscle cell to AV node cell communication	GO	4 out of 8	5.48067	upregulated	1	2.66864	0.0693					upregulated	1	1.08774	0.337	downregulated	1	2.46594	0.0849					upregulated	3	1.8651	0.1549	upregulated	2	2.43978	0.0872	upregulated	1	2.46624	0.0849
S100 protein binding	GO	3 out of 8	5.41158	downregulated	1	1.56579	0.2089	downregulated	1	1.31611	0.2682	upregulated	1	0.97011	0.379	downregulated	2	3.7361	0.0238													downregulated	1	0.236314	0.7895
microtubule motor activity	GO	2 out of 8	5.39138	downregulated	2	3.21332	0.0402	upregulated	3	0.974449	0.3774	downregulated	10	2.37908	0.0926	downregulated	5	1.56961	0.2081	downregulated	2	2.24136	0.1063	upregulated	11	5.87163	0.0028	upregulated	14	5.46613	0.0042	downregulated	5	3.70501	0.0246
neuropeptide binding	GO	5 out of 8	5.38955	upregulated	1	4.14601	0.0158					downregulated	1	0.434128	0.6478					upregulated	1	3.09999	0.045	upregulated	1	2.19865	0.111	upregulated	1	1.43526	0.2381	upregulated	1	2.36754	0.0937
negative regulation of intrinsic apoptotic signaling pathway in response to DNA damage by p53 class mediator	GO	4 out of 8	5.37785	upregulated	2	1.64122	0.1937	upregulated	3	3.96048	0.0191	downregulated	1	2.92929	0.0534	downregulated	3	7.0526	0.0009					upregulated	1	0.569114	0.566	upregulated	1	0.428544	0.6515
basolateral plasma membrane	GO	5 out of 8	5.36947	downregulated	6	1.65826	0.1905	upregulated	7	4.27103	0.014	downregulated	14	4.446	0.0117	downregulated	9	5.55269	0.0039	upregulated	7	4.48497	0.0113	downregulated	13	5.35668	0.0047	downregulated	13	4.94221	0.0071	upregulated	11	3.79747	0.0224
positive regulation of glycoprotein metabolic process	GO	4 out of 8	5.36024	upregulated	1	0.743321	0.4755	upregulated	1	0.67255	0.5104					upregulated	1	1.57847	0.2063	upregulated	1	0.890735	0.4104	upregulated	4	2.71479	0.0662	upregulated	4	2.81363	0.06	upregulated	2	1.93543	0.1444
acyl-CoA dehydrogenase activity	GO	4 out of 8	5.35758					upregulated	1	2.72322	0.0657	upregulated	1	1.95545	0.1415					upregulated	1	1.74531	0.1746	upregulated	1	1.02637	0.3583	upregulated	1	1.01125	0.3638	upregulated	2	1.57463	0.2071
quinone metabolic process	GO	3 out of 8	5.35663	upregulated	1	0.802111	0.4484	upregulated	1	1.4754	0.2287	downregulated	3	1.35811	0.2571	downregulated	4	6.5572	0.0014					downregulated	2	0.694787	0.4992	downregulated	1	0.353407	0.7023	upregulated	3	0.767029	0.4644
centrosome cycle	GO	6 out of 8	5.35073	upregulated	3	1.19355	0.3031	upregulated	7	6.03609	0.0024	downregulated	10	4.47432	0.0114	downregulated	7	5.4372	0.0044	upregulated	1	1.32071	0.2669	upregulated	5	0.325957	0.7218	upregulated	9	0.741551	0.4764	upregulated	7	0.280631	0.7553
regulation of JAK-STAT cascade	GO	5 out of 8	5.34795	downregulated	4	2.17045	0.1141	downregulated	1	2.25252	0.1051	upregulated	3	0.527803	0.5899	downregulated	4	1.22322	0.2943	downregulated	1	0.0175517	0.9826	upregulated	7	0.520994	0.5939	upregulated	5	0.612735	0.5419	downregulated	6	0.886612	0.412
protein transporter activity	GO	4 out of 8	5.34251	upregulated	6	1.10046	0.3327	upregulated	4	2.02161	0.1324	downregulated	3	7.65195	0.0005	downregulated	3	1.35362	0.2583	upregulated	1	1.2721	0.2802	downregulated	9	2.00298	0.1349	upregulated	8	0.657057	0.5184	downregulated	6	0.467172	0.6268
nuclear receptor activity	GO	4 out of 8	5.33354	downregulated	3	1.73583	0.1763	downregulated	2	2.14088	0.1176	downregulated	2	0.0724494	0.9301	upregulated	2	3.68353	0.0251	upregulated	1	0.362775	0.6957	upregulated	4	0.841853	0.4309	upregulated	5	0.74233	0.476	upregulated	3	3.38658	0.0338
regulation of cellular senescence	GO	4 out of 8	5.32431	upregulated	2	1.25671	0.2846	upregulated	3	2.45911	0.0855	downregulated	4	1.71808	0.1794	downregulated	2	0.863967	0.4215	downregulated	1	0.366861	0.6929	upregulated	5	2.91423	0.0542	upregulated	5	3.91071	0.02	upregulated	3	1.54183	0.214
negative regulation of execution phase of apoptosis	GO	5 out of 8	5.28938	upregulated	1	3.10546	0.0448					downregulated	2	2.14375	0.1172	downregulated	2	3.02421	0.0486	downregulated	1	1.39004	0.2491	upregulated	2	1.71584	0.1798	upregulated	1	1.38324	0.2508	upregulated	1	1.51784	0.2192
cellular defense response	GO	5 out of 8	5.2773	upregulated	1	0.186259	0.8301	upregulated	1	3.06764	0.0465	downregulated	6	2.38968	0.0917	downregulated	4	3.86824	0.0209					upregulated	1	0.828358	0.4368	upregulated	3	0.931037	0.3941	upregulated	1	0.513883	0.5982
pyrimidine nucleotide-sugar transmembrane transport	GO	4 out of 8	5.25288	downregulated	1	1.94015	0.1437	upregulated	1	1.9674	0.1398	downregulated	1	2.08726	0.124	downregulated	1	1.96841	0.1397					upregulated	1	1.22445	0.2939
phosphate ion binding	GO	4 out of 8	5.23671									downregulated	1	0.889286	0.4109									upregulated	1	0.916125	0.4001	upregulated	2	1.71297	0.1803	upregulated	2	1.71833	0.1794
porphyrin-containing compound metabolic process	GO	4 out of 8	5.18228	upregulated	1	1.00178	0.3672	upregulated	3	3.00814	0.0494	downregulated	3	2.4083	0.09	upregulated	1	1.93816	0.144					upregulated	3	0.819342	0.4407	upregulated	4	3.21649	0.0401	upregulated	5	4.68624	0.0092
cerebellar cortex development	GO	3 out of 8	5.16733					upregulated	1	0.545706	0.5794	upregulated	1	1.38191	0.2511	downregulated	1	0.457863	0.6326	upregulated	2	2.57711	0.076	upregulated	5	3.87515	0.0208	upregulated	6	2.76194	0.0632	upregulated	5	3.3085	0.0366
collagen trimer	GO	3 out of 8	5.16214	downregulated	1	0.208668	0.8117	downregulated	1	0.884592	0.4129	downregulated	6	1.89831	0.1498	downregulated	3	2.8452	0.0581					upregulated	5	2.27998	0.1023	upregulated	6	2.81319	0.06	upregulated	2	0.0689655	0.9334
Wnt signaling pathway involved in midbrain dopaminergic neuron differentiation	GO	2 out of 8	5.1544																					upregulated	2	3.00618	0.0495	upregulated	2	3.26482	0.0382	downregulated	1	1.11661	0.3274
signal transduction involved in DNA damage checkpoint	GO	6 out of 8	5.09613	upregulated	2	0.0566625	0.9449	upregulated	7	4.5134	0.011	downregulated	9	5.08159	0.0062	downregulated	5	2.43174	0.0879	upregulated	2	0.604576	0.5463	upregulated	8	0.998869	0.3683	upregulated	8	0.354969	0.7012	upregulated	4	0.194441	0.8233
microtubule organizing center organization	GO	6 out of 8	5.09383	upregulated	3	0.99367	0.3702	upregulated	8	5.93368	0.0026	downregulated	12	5.36459	0.0047	downregulated	7	4.55626	0.0105	upregulated	1	1.16881	0.3107	upregulated	5	0.212713	0.8084	upregulated	9	0.360975	0.697	upregulated	9	0.357832	0.6992
regulation of centrosome cycle	GO	5 out of 8	5.09379	upregulated	5	2.84501	0.0581	upregulated	4	3.89559	0.0203	downregulated	7	3.09263	0.0454	downregulated	2	0.526589	0.5906	upregulated	2	4.13686	0.016	upregulated	5	2.43401	0.0877	upregulated	7	1.93858	0.1439	downregulated	3	0.294276	0.7451
nucleotide transmembrane transport	GO	4 out of 8	5.08309	downregulated	1	1.22612	0.2934	downregulated	2	5.04983	0.0064	upregulated	1	1.04543	0.3515	downregulated	1	1.2478	0.2871	downregulated	1	1.65293	0.1915	downregulated	1	1.76656	0.1709	downregulated	1	2.26384	0.104	upregulated	3	4.2881	0.0137
regulation of intrinsic apoptotic signaling pathway in response to DNA damage by p53 class mediator	GO	4 out of 8	5.07904	upregulated	2	1.53761	0.2149	upregulated	3	3.89215	0.0204	downregulated	1	2.80772	0.0603	downregulated	3	6.79771	0.0011					upregulated	1	0.518854	0.5952	upregulated	1	0.384521	0.6808
lipoprotein particle binding	GO	5 out of 8	5.06605					downregulated	1	0.78323	0.4569	upregulated	1	4.48965	0.0112	downregulated	3	3.00497	0.0495					upregulated	2	0.54265	0.5812	upregulated	2	4.6431	0.0096	upregulated	2	0.581746	0.5589
phosphatidylinositol-3,5-bisphosphate phosphatase activity	GO	5 out of 8	5.05634	upregulated	1	0.783858	0.4566					downregulated	2	2.94396	0.0527	downregulated	1	1.01244	0.3633					upregulated	1	0.594148	0.552	upregulated	1	0.286198	0.7511	upregulated	2	1.00345	0.3666
spindle	GO	3 out of 8	5.0369	upregulated	27	6.16406	0.0021	upregulated	20	6.456	0.0016	downregulated	28	3.79928	0.0224	downregulated	16	2.33411	0.0969	upregulated	5	1.45706	0.2329	upregulated	28	1.47632	0.2285	upregulated	33	2.10351	0.122	downregulated	8	2.36078	0.0943
antigen processing and presentation of peptide antigen via MHC class I	GO	3 out of 8	5.00086	upregulated	1	0.324389	0.723	upregulated	2	0.451885	0.6364	upregulated	3	2.91598	0.0542	downregulated	5	3.02269	0.0487					upregulated	3	0.611464	0.5426	upregulated	4	4.04786	0.0175	upregulated	3	0.341534	0.7107
negative regulation of extrinsic apoptotic signaling pathway via death domain receptors	GO	6 out of 8	4.99916					upregulated	2	5.3726	0.0046	downregulated	3	1.58553	0.2048	downregulated	2	1.73412	0.1766	upregulated	1	0.939128	0.391	upregulated	3	3.18675	0.0413	upregulated	4	2.41198	0.0896	upregulated	2	0.514251	0.5979
regulation of endothelial cell apoptotic process	GO	5 out of 8	4.99253	upregulated	2	2.41038	0.0898	downregulated	1	1.30595	0.2709	downregulated	3	1.56754	0.2086	downregulated	4	3.65201	0.0259	downregulated	1	0.34693	0.7069	upregulated	2	1.00392	0.3664	upregulated	3	0.800616	0.4491	downregulated	2	0.580182	0.5598
hormone metabolic process	GO	2 out of 8	4.98709	upregulated	3	1.38706	0.2498	upregulated	2	0.925225	0.3964	downregulated	9	3.39497	0.0335	downregulated	10	4.92484	0.0073	downregulated	2	0.239369	0.7871	downregulated	5	0.152985	0.8581	downregulated	5	0.382601	0.6821	downregulated	4	0.245485	0.7823
phosphatidylinositol 3-kinase regulatory subunit binding	GO	3 out of 8	4.98385									downregulated	1	0.879127	0.4151	downregulated	2	3.61769	0.0268	downregulated	1	1.29055	0.2751	downregulated	1	1.36598	0.2551	upregulated	3	2.30266	0.1	upregulated	2	3.14356	0.0431
embryonic epithelial tube formation	GO	3 out of 8	4.96235	upregulated	3	0.771123	0.4625	upregulated	3	2.71154	0.0664	downregulated	11	6.21484	0.002	downregulated	4	0.951383	0.3862	upregulated	3	2.44994	0.0863	upregulated	10	2.04085	0.1299	upregulated	12	1.25715	0.2845	downregulated	8	0.785592	0.4558
snoRNA binding	GO	4 out of 8	4.96027	upregulated	1	0.390694	0.6766	downregulated	2	2.0679	0.1265									upregulated	1	0.928295	0.3952	upregulated	1	0.948417	0.3874	upregulated	4	1.6497	0.1921	downregulated	1	0.243354	0.784
response to angiotensin	GO	5 out of 8	4.95382					upregulated	2	2.75104	0.0639	downregulated	3	1.4214	0.2414	downregulated	3	4.35126	0.0129					upregulated	2	0.417767	0.6585	upregulated	2	0.596086	0.551	upregulated	2	0.918345	0.3992
mitochondrial outer membrane permeabilization	GO	4 out of 8	4.93582	downregulated	1	1.61172	0.1995																	upregulated	1	0.753885	0.4705	upregulated	1	1.39225	0.2485	upregulated	2	1.17796	0.3079
signal transduction involved in cell cycle checkpoint	GO	6 out of 8	4.91468	upregulated	2	0.0535668	0.9478	upregulated	7	4.45687	0.0116	downregulated	9	4.97281	0.0069	downregulated	5	2.38053	0.0925	upregulated	2	0.589808	0.5544	upregulated	8	0.957428	0.3839	upregulated	8	0.33934	0.7122	upregulated	4	0.185191	0.8309
neuron projection extension	GO	5 out of 8	4.91342	upregulated	3	2.24281	0.1062	upregulated	3	3.1038	0.0449	downregulated	4	2.65705	0.0702	downregulated	3	2.57529	0.0761	downregulated	2	1.79739	0.1657	upregulated	7	2.67211	0.0691	upregulated	6	2.09079	0.1236	upregulated	5	2.06218	0.1272
nerve growth factor signaling pathway	GO	4 out of 8	4.87902	upregulated	1	1.28865	0.2756					downregulated	1	1.00685	0.3654	downregulated	1	1.95216	0.142					upregulated	3	2.17188	0.114	upregulated	2	1.03678	0.3546	downregulated	1	2.00015	0.1353
mitotic sister chromatid cohesion	GO	5 out of 8	4.81306	downregulated	1	3.62373	0.0267	upregulated	1	2.94466	0.0526	downregulated	3	2.10368	0.122	downregulated	1	1.22709	0.2931					downregulated	2	1.03098	0.3567	upregulated	2	0.74243	0.476	upregulated	2	1.09176	0.3356
roof of mouth development	GO	2 out of 8	4.807	upregulated	5	3.24736	0.0389					upregulated	7	4.05233	0.0174	downregulated	2	0.94497	0.3887	downregulated	4	5.04144	0.0065	upregulated	15	7.91436	0.0004	downregulated	6	5.52504	0.004	downregulated	4	3.83117	0.0217
response to gravity	GO	2 out of 8	4.79767									downregulated	1	1.9445	0.1431	downregulated	1	2.85317	0.0577
proteasome core complex, beta-subunit complex	GO	3 out of 8	4.78962									downregulated	2	2.31471	0.0988	downregulated	1	1.83497	0.1596													upregulated	1	0.63994	0.5273
negative regulation of transcription regulatory region DNA binding	GO	6 out of 8	4.77628	upregulated	1	0.822563	0.4393	upregulated	1	3.38957	0.0337	downregulated	1	1.62402	0.1971	downregulated	2	1.74217	0.1751	upregulated	1	1.2187	0.2956	upregulated	2	1.5823	0.2055	upregulated	3	1.57938	0.2061	upregulated	3	1.24185	0.2889
regulation of protein import	GO	5 out of 8	4.74246	upregulated	4	1.78393	0.168	upregulated	2	1.10517	0.3312	downregulated	3	0.991603	0.371	downregulated	3	1.10745	0.3304	downregulated	4	1.25816	0.2842	upregulated	4	0.898632	0.4071	upregulated	7	3.80117	0.0223	upregulated	4	2.09087	0.1236
midbrain dopaminergic neuron differentiation	GO	2 out of 8	4.7394																					upregulated	2	2.74233	0.0644	upregulated	2	2.99614	0.05	downregulated	1	0.999063	0.3682
fibrillar collagen trimer	GO	3 out of 8	4.7379	downregulated	1	1.24735	0.2873									downregulated	1	0.803404	0.4478					upregulated	1	2.12861	0.119	upregulated	1	2.07363	0.1257	upregulated	1	0.535658	0.5853
nucleotidyltransferase activity	GO	5 out of 8	4.73564	downregulated	3	0.622837	0.5364	upregulated	7	2.77275	0.0625	downregulated	10	1.42329	0.2409	downregulated	8	3.37588	0.0342	downregulated	1	0.0923341	0.9118	downregulated	6	0.149399	0.8612	upregulated	13	1.23883	0.2897	upregulated	9	1.08928	0.3365
cell division site	GO	4 out of 8	4.72374	upregulated	6	2.27733	0.1026	upregulated	5	1.95608	0.1414	downregulated	5	3.80458	0.0223	downregulated	4	3.10139	0.045	upregulated	4	4.10941	0.0164	upregulated	8	2.88638	0.0558	downregulated	5	2.00781	0.1343	downregulated	4	2.93679	0.053
cellular ketone metabolic process	GO	3 out of 8	4.70865	downregulated	2	0.894529	0.4088	upregulated	1	0.83041	0.4359	downregulated	4	0.976513	0.3766	downregulated	6	7.09683	0.0008	downregulated	1	0.677348	0.508	downregulated	4	0.733875	0.48	downregulated	3	0.744511	0.475	downregulated	1	1.27308	0.28
low-density lipoprotein particle binding	GO	4 out of 8	4.70516									upregulated	1	5.04715	0.0064	downregulated	2	3.55407	0.0286					upregulated	1	0.537765	0.5841	upregulated	2	5.22909	0.0054	upregulated	1	0.431378	0.6496
cellular response to interleukin-7	GO	4 out of 8	4.7023	upregulated	2	2.81426	0.0599					downregulated	3	2.16864	0.1143	downregulated	1	1.95291	0.1419	downregulated	1	1.90557	0.1487	downregulated	1	1.5143	0.22	upregulated	2	2.09027	0.1237	upregulated	2	0.396051	0.673
neural tube formation	GO	3 out of 8	4.67319	upregulated	3	0.989237	0.3719	upregulated	3	2.86064	0.0572	downregulated	8	3.74707	0.0236	downregulated	2	0.282705	0.7537	upregulated	2	1.96946	0.1395	upregulated	9	2.52815	0.0798	upregulated	11	1.39007	0.2491	downregulated	7	1.21449	0.2969
9+2 motile cilium	GO	4 out of 8	4.66512	upregulated	5	2.5572	0.0775	upregulated	4	1.84541	0.158	upregulated	3	2.14445	0.1171	upregulated	1	2.53783	0.079	upregulated	3	2.67407	0.069	upregulated	9	2.9988	0.0498	upregulated	13	6.703	0.0012	upregulated	4	1.37414	0.2531
regulation of transforming growth factor beta receptor signaling pathway	GO	3 out of 8	4.64939	upregulated	5	2.23004	0.1075	downregulated	2	4.12832	0.0161	upregulated	7	4.94126	0.0071	downregulated	6	3.37947	0.0341	upregulated	3	4.85529	0.0078	upregulated	10	3.58593	0.0277	upregulated	12	2.88433	0.0559	downregulated	6	2.2095	0.1098
development of primary female sexual characteristics	GO	3 out of 8	4.63793	downregulated	3	2.36074	0.0944	upregulated	2	1.59347	0.2032	upregulated	4	2.7793	0.0621	downregulated	4	1.62113	0.1977	downregulated	4	3.49158	0.0305	upregulated	4	3.0057	0.0495	downregulated	4	1.71278	0.1804	upregulated	5	5.02883	0.0065
nuclease activity	GO	4 out of 8	4.59028	upregulated	13	2.70309	0.067	upregulated	15	8.92238	0.0001	downregulated	20	9.1061	0.0001	downregulated	10	5.18786	0.0056	upregulated	2	0.126167	0.8815	upregulated	12	1.42823	0.2397	upregulated	16	1.50437	0.2222	upregulated	13	1.53151	0.2162
positive regulation of autophagy of mitochondrion in response to mitochondrial depolarization	GO	3 out of 8	4.58549	downregulated	1	1.75978	0.1721					downregulated	2	1.59946	0.202	downregulated	1	1.22625	0.2934
regulation of DNA-templated transcription, initiation	GO	6 out of 8	4.58471	upregulated	6	5.39852	0.0045	upregulated	1	0.93469	0.3927	downregulated	3	0.762778	0.4664	downregulated	3	2.48889	0.083	upregulated	1	1.311	0.2696	upregulated	4	1.74135	0.1753	upregulated	6	2.44731	0.0865	upregulated	5	2.16659	0.1146
hydro-lyase activity	GO	3 out of 8	4.5803	downregulated	2	3.51702	0.0297					upregulated	1	0.742565	0.4759	downregulated	2	0.788117	0.4547	downregulated	1	0.201688	0.8174	downregulated	1	0.0704898	0.9319	downregulated	2	0.231175	0.7936	upregulated	6	1.52108	0.2185
regulation of lymphocyte migration	GO	3 out of 8	4.56743									downregulated	5	2.04879	0.1289	downregulated	3	3.09677	0.0452					downregulated	3	0.651441	0.5213	upregulated	3	1.45273	0.2339	downregulated	4	1.37942	0.2517
monosaccharide metabolic process	GO	3 out of 8	4.56186	downregulated	3	4.18084	0.0153	downregulated	4	1.78062	0.1685	downregulated	4	1.08204	0.3389	downregulated	6	1.17069	0.3102	downregulated	2	0.327935	0.7204	upregulated	7	1.5168	0.2194	upregulated	9	1.64883	0.1923	upregulated	7	1.72416	0.1783
cytoplasmic translational initiation	GO	3 out of 8	4.55827									downregulated	2	1.07646	0.3408	downregulated	2	3.24081	0.0391					downregulated	1	0.303554	0.7382					upregulated	1	0.544545	0.5801
ventricular cardiac muscle cell action potential	GO	3 out of 8	4.55661					downregulated	2	7.47103	0.0006					downregulated	1	2.31225	0.099	downregulated	1	2.91377	0.0543	downregulated	1	2.16248	0.115	downregulated	2	2.38911	0.0917	upregulated	2	2.23869	0.1066
regulation of odontogenesis of dentin-containing tooth	GO	3 out of 8	4.5557									downregulated	1	3.52945	0.0293									upregulated	1	0.779156	0.4588	upregulated	1	1.56914	0.2082	downregulated	1	1.32205	0.2666
ubiquitin-like modifier activating enzyme activity	GO	4 out of 8	4.55398					downregulated	1	1.60867	0.2002													upregulated	1	0.555462	0.5738	upregulated	1	0.95174	0.3861	upregulated	1	1.43811	0.2374
response to hypoxia	GO	3 out of 8	4.54819	downregulated	15	11.6998	8.3e-06	downregulated	5	1.39504	0.2478	downregulated	22	2.80614	0.0604	downregulated	20	6.81256	0.0011	upregulated	7	2.40489	0.0903	upregulated	20	1.98203	0.1378	downregulated	13	1.11101	0.3292	upregulated	24	1.27229	0.2802
histone methyltransferase complex	GO	3 out of 8	4.53536	upregulated	6	2.0346	0.1307	upregulated	4	1.59428	0.2031	upregulated	1	0.611329	0.5426	upregulated	1	1.12385	0.325					upregulated	8	1.68925	0.1847	upregulated	10	2.67764	0.0687	upregulated	12	5.53254	0.004
post-anal tail morphogenesis	GO	4 out of 8	4.53113	upregulated	3	4.88414	0.0076					downregulated	1	0.396243	0.6728					upregulated	1	2.33635	0.0967	upregulated	2	3.54489	0.0289	upregulated	2	3.13778	0.0434
CoA-ligase activity	GO	5 out of 8	4.50494	downregulated	3	4.92449	0.0073	upregulated	1	0.698759	0.4972	upregulated	4	6.49082	0.0015	downregulated	1	1.14797	0.3173	downregulated	1	1.62902	0.1961	upregulated	3	1.93375	0.1446	upregulated	2	1.81285	0.1632	upregulated	2	3.50449	0.0301
modification of morphology or physiology of other organism	GO	7 out of 8	4.50128	downregulated	4	2.10987	0.1213	upregulated	5	3.7707	0.023	downregulated	5	0.920971	0.3981	downregulated	2	0.232238	0.7928	upregulated	2	1.28815	0.2758	upregulated	8	1.23902	0.2897	upregulated	12	1.41178	0.2437	upregulated	12	1.06995	0.343
Golgi vesicle transport	GO	5 out of 8	4.4962	downregulated	6	1.35555	0.2578	upregulated	15	1.19134	0.3038	downregulated	27	1.94947	0.1424	downregulated	16	2.40102	0.0906	upregulated	6	2.84022	0.0584	downregulated	26	2.1808	0.113	upregulated	35	1.26456	0.2824	downregulated	25	1.94247	0.1433
regulation of production of miRNAs involved in gene silencing by miRNA	GO	5 out of 8	4.49611									downregulated	2	0.647742	0.5232	downregulated	1	0.689453	0.5019					upregulated	1	0.122276	0.8849	upregulated	2	0.880054	0.4148	upregulated	3	2.15658	0.1157
endoplasmic reticulum mannose trimming	GO	5 out of 8	4.45386	upregulated	1	0.55854	0.572	upregulated	2	1.90724	0.1485	downregulated	1	0.30586	0.7365	downregulated	2	2.40612	0.0902					upregulated	1	1.54716	0.2129	upregulated	1	1.34548	0.2604	upregulated	1	1.31502	0.2685
transcription elongation factor complex	GO	6 out of 8	4.44402	downregulated	1	0.471111	0.6243	downregulated	2	1.77355	0.1697	downregulated	2	0.163145	0.8495	downregulated	5	2.57989	0.0758	downregulated	1	1.39868	0.2469	upregulated	4	1.82455	0.1613	upregulated	5	1.19873	0.3016	downregulated	4	2.16828	0.1144
neural precursor cell proliferation	GO	4 out of 8	4.38122	upregulated	1	1.08374	0.3383	downregulated	1	0.689777	0.5017	downregulated	9	7.50455	0.0006	downregulated	7	5.13605	0.0059	downregulated	6	3.05113	0.0473	upregulated	11	2.6946	0.0676	downregulated	8	3.29089	0.0372	downregulated	6	4.21801	0.0147
estrogen metabolic process	GO	2 out of 8	4.37526					upregulated	1	1.0469	0.351	downregulated	3	1.683	0.1858	downregulated	3	4.67153	0.0094													downregulated	1	0.932362	0.3936
regulation of podosome assembly	GO	4 out of 8	4.36986					upregulated	1	2.41038	0.0898	downregulated	2	2.07731	0.1253	downregulated	1	1.29699	0.2734					downregulated	1	1.1023	0.3321	upregulated	2	1.33787	0.2624	upregulated	3	3.17038	0.042
positive regulation of T cell migration	GO	3 out of 8	4.36961									upregulated	1	2.06117	0.1273	downregulated	3	4.04461	0.0175					upregulated	1	0.494368	0.61	upregulated	3	1.8918	0.1508	downregulated	2	0.94294	0.3895
opsonin binding	GO	3 out of 8	4.36094									downregulated	3	5.35247	0.0047	downregulated	2	4.84373	0.0079					upregulated	1	1.30229	0.2719	upregulated	1	0.752375	0.4712	upregulated	1	2.30627	0.0996
RNA phosphodiester bond hydrolysis	GO	6 out of 8	4.35417	upregulated	8	1.92231	0.1463	upregulated	15	13.1295	2e-06	downregulated	14	6.90587	0.001	downregulated	11	6.82179	0.0011	upregulated	2	0.284631	0.7523	upregulated	7	1.73566	0.1763	upregulated	14	1.8149	0.1629	upregulated	7	1.84307	0.1583
phospholipid transport	GO	4 out of 8	4.34389	downregulated	2	0.56792	0.5667	upregulated	4	2.74759	0.0641	downregulated	7	4.52153	0.0109	downregulated	6	5.14327	0.0058	downregulated	4	2.67971	0.0686	upregulated	7	1.79372	0.1663	downregulated	7	1.49564	0.2241	downregulated	6	0.759615	0.4678
protein insertion into membrane	GO	4 out of 8	4.33317	downregulated	2	2.46942	0.0846					downregulated	1	0.712202	0.4906	downregulated	1	0.749606	0.4726					downregulated	2	0.820454	0.4402	upregulated	2	1.25708	0.2845	upregulated	2	2.43474	0.0876
placenta development	GO	4 out of 8	4.32528	downregulated	5	2.79951	0.0608	upregulated	4	1.40219	0.2461	downregulated	10	3.53735	0.0291	downregulated	13	6.37391	0.0017	upregulated	1	0.312218	0.7318	upregulated	6	1.12612	0.3243	upregulated	8	1.05045	0.3498	upregulated	8	1.8365	0.1594
regulation of NLRP3 inflammasome complex assembly	GO	3 out of 8	4.31711					upregulated	1	4.04199	0.0176	downregulated	1	1.50557	0.2219									upregulated	1	1.15527	0.315	upregulated	1	5.69826	0.0034
natural killer cell activation	GO	4 out of 8	4.29991	downregulated	1	0.911967	0.4017	upregulated	2	0.956467	0.3842	upregulated	3	1.84597	0.1579	downregulated	2	4.11239	0.0164									upregulated	1	0.199163	0.8194	upregulated	1	0.0328569	0.9677
osteoblast development	GO	3 out of 8	4.26609									downregulated	2	3.0981	0.0451									upregulated	3	2.16419	0.1148	upregulated	2	1.18038	0.3072	upregulated	2	0.921514	0.3979
cellular response to sterol	GO	4 out of 8	4.23301	upregulated	1	1.78279	0.1682									downregulated	1	1.27599	0.2792					upregulated	1	0.536089	0.585	upregulated	1	0.629524	0.5328	upregulated	3	3.57421	0.028
formation of primary germ layer	GO	4 out of 8	4.2279	downregulated	3	3.3115	0.0365	upregulated	1	0.148497	0.862	downregulated	7	6.49573	0.0015	downregulated	5	5.91735	0.0027	upregulated	1	0.340835	0.7112	upregulated	10	1.6573	0.1907	upregulated	10	1.14605	0.3179	upregulated	7	1.08371	0.3383
protein alpha-1,2-demannosylation	GO	5 out of 8	4.22748	upregulated	1	0.410446	0.6634	upregulated	2	1.52494	0.2176	downregulated	1	0.199337	0.8193	downregulated	2	1.99377	0.1362					upregulated	2	1.21443	0.2969	upregulated	2	1.49114	0.2251	upregulated	2	1.26419	0.2825
positive regulation of myoblast fusion	GO	3 out of 8	4.22668					upregulated	1	0.743832	0.4753	downregulated	1	1.92744	0.1455	downregulated	1	3.01385	0.0491									upregulated	1	0.952355	0.3858	downregulated	2	0.923136	0.3973
body morphogenesis	GO	3 out of 8	4.2131	upregulated	2	0.338361	0.7129					upregulated	1	0.308479	0.7346	downregulated	2	0.510052	0.6005					upregulated	6	2.04587	0.1293	upregulated	7	3.57511	0.028	downregulated	5	1.27109	0.2805
site of DNA damage	GO	5 out of 8	4.20852	upregulated	3	0.97078	0.3788	upregulated	3	1.14507	0.3182	downregulated	3	0.311974	0.732	downregulated	5	3.25348	0.0386					upregulated	3	0.328681	0.7199	upregulated	6	1.41371	0.2432	upregulated	5	1.01653	0.3618
detection of biotic stimulus	GO	3 out of 8	4.20068					upregulated	1	3.61585	0.0269	downregulated	1	0.622947	0.5364	downregulated	3	6.13048	0.0022					upregulated	1	1.0631	0.3454
oxidoreductase activity, acting on the CH-NH2 group of donors, oxygen as acceptor	GO	3 out of 8	4.18435																					upregulated	1	1.83372	0.1598	upregulated	1	2.01391	0.1335	upregulated	1	0.336715	0.7141
purine-containing compound transmembrane transport	GO	4 out of 8	4.18337	downregulated	1	1.50241	0.2226					downregulated	1	1.17981	0.3073	downregulated	1	1.52519	0.2176									upregulated	1	0.854238	0.4256	downregulated	1	0.878286	0.4155
regulation of osteoclast development	GO	2 out of 8	4.16701													downregulated	1	4.97886	0.0069					downregulated	1	1.0631	0.3454	upregulated	1	0.251253	0.7778
RNA polymerase I activity	GO	3 out of 8	4.15101	downregulated	1	1.50241	0.2226	downregulated	2	3.82036	0.0219	downregulated	1	1.57488	0.207									downregulated	2	1.46462	0.2312	downregulated	1	0.74147	0.4764	downregulated	1	0.540547	0.5824
carboxylic ester hydrolase activity	GO	5 out of 8	4.14764	downregulated	2	1.21363	0.2971	downregulated	1	0.338641	0.7127	downregulated	6	4.3275	0.0132	downregulated	6	2.79393	0.0612	downregulated	1	1.57054	0.2079	downregulated	6	2.18751	0.1122	downregulated	5	1.71514	0.1799	upregulated	6	0.947126	0.3879
negative regulation of gene expression, epigenetic	GO	5 out of 8	4.14701	upregulated	3	1.17787	0.3079	upregulated	7	6.44539	0.0016	downregulated	7	2.23502	0.107	downregulated	4	1.79198	0.1666	downregulated	1	0.157173	0.8546	upregulated	6	1.47034	0.2298	upregulated	8	2.1695	0.1142	upregulated	8	4.26061	0.0141
leukocyte mediated cytotoxicity	GO	4 out of 8	4.14403	downregulated	1	1.18068	0.3071	upregulated	1	0.485522	0.6154	upregulated	2	1.36307	0.2559	upregulated	1	2.19041	0.1119	upregulated	1	0.812176	0.4439	upregulated	3	0.845161	0.4295	upregulated	4	1.49663	0.2239	upregulated	3	0.990067	0.3716
regulation of carbohydrate metabolic process	GO	3 out of 8	4.14348	upregulated	7	2.84424	0.0582	downregulated	6	2.33068	0.0972	upregulated	4	1.69507	0.1836	downregulated	5	2.89709	0.0552	upregulated	4	2.58815	0.0752	downregulated	11	3.93688	0.0195	upregulated	17	1.68025	0.1863	upregulated	13	3.81197	0.0221
positive regulation of response to endoplasmic reticulum stress	GO	5 out of 8	4.13841	upregulated	2	0.971216	0.3786	upregulated	3	2.42545	0.0884	downregulated	3	2.38803	0.0918	downregulated	2	0.867145	0.4201	upregulated	1	2.12527	0.1194	downregulated	3	1.15907	0.3138	upregulated	5	1.46316	0.2315	upregulated	2	1.85055	0.1572
sperm motility	GO	5 out of 8	4.11923	upregulated	2	0.378756	0.6847	upregulated	3	1.04541	0.3515	downregulated	1	0.123359	0.8839	downregulated	1	0.188166	0.8285	downregulated	1	0.332985	0.7168	upregulated	5	1.54878	0.2125	upregulated	7	3.17399	0.0418	upregulated	4	0.842091	0.4308
RNA polymerase II distal enhancer sequence-specific DNA binding	GO	5 out of 8	4.11564	upregulated	3	3.33643	0.0356	downregulated	1	2.54451	0.0785	upregulated	3	1.05211	0.3492	downregulated	4	1.44068	0.2368	downregulated	2	1.03618	0.3548	upregulated	10	1.78551	0.1677	upregulated	11	1.8597	0.1557	upregulated	10	1.90996	0.1481
response to extracellular stimulus	GO	5 out of 8	4.09452	downregulated	9	3.81619	0.022	upregulated	17	5.9844	0.0025	upregulated	24	7.16824	0.0008	downregulated	27	10.2238	3.6e-05	downregulated	19	1.35405	0.2582	upregulated	22	1.44439	0.2359	upregulated	27	1.84457	0.1581	upregulated	33	1.27223	0.2802
peristalsis	GO	2 out of 8	4.09079									downregulated	2	4.35379	0.0129									upregulated	1	1.18816	0.3048					downregulated	2	1.45116	0.2343
positive regulation of signal transduction by p53 class mediator	GO	3 out of 8	4.08656	downregulated	1	2.75102	0.0639					downregulated	3	3.18749	0.0413	downregulated	1	2.26804	0.1035	downregulated	1	1.10852	0.33	downregulated	1	0.721835	0.4859	downregulated	1	0.77051	0.4628	downregulated	1	1.51912	0.2189
microtubule	GO	3 out of 8	4.07096	upregulated	22	1.39693	0.2474	upregulated	13	1.44119	0.2366	downregulated	45	11.3016	1.2e-05	downregulated	27	6.95558	0.001	upregulated	9	1.56833	0.2084	upregulated	36	2.78356	0.0618	upregulated	43	2.32748	0.0975	downregulated	23	2.60841	0.0737
negative regulation of ubiquitin-dependent protein catabolic process	GO	3 out of 8	4.0695	downregulated	1	2.55542	0.0777					downregulated	4	2.21147	0.1095	upregulated	1	1.98163	0.1378	upregulated	1	2.32698	0.0976	upregulated	4	1.38601	0.2501	upregulated	6	1.02398	0.3592	upregulated	6	0.71854	0.4875
embryonic skeletal joint development	GO	3 out of 8	4.06812	downregulated	2	3.46264	0.0313					upregulated	1	2.39898	0.0908									upregulated	1	1.20914	0.2985	upregulated	1	1.79532	0.1661
cell trailing edge	GO	2 out of 8	4.04923									downregulated	1	1.28972	0.2753	downregulated	2	2.7595	0.0633
nuclear transcriptional repressor complex	GO	4 out of 8	4.02875	upregulated	1	0.236641	0.7893	upregulated	2	1.36149	0.2563	downregulated	1	0.644998	0.5247					upregulated	1	2.01623	0.1332	upregulated	2	1.34668	0.2601	upregulated	4	1.61897	0.1981	upregulated	3	1.56932	0.2082
condensed chromosome outer kinetochore	GO	3 out of 8	4.02838	upregulated	1	1.01185	0.3635																	upregulated	1	0.524301	0.592	upregulated	2	1.61659	0.1986	upregulated	2	1.88749	0.1515
structural constituent of nuclear pore	GO	2 out of 8	4.02648	upregulated	1	0.344601	0.7085	upregulated	1	0.649471	0.5223	downregulated	3	1.331	0.2642	downregulated	4	4.34835	0.0129					downregulated	1	0.170687	0.8431	downregulated	1	0.268364	0.7646	downregulated	1	0.219748	0.8027
positive regulation of adherens junction organization	GO	2 out of 8	4.01012	downregulated	2	4.61201	0.0099	upregulated	1	0.800398	0.4491	downregulated	4	3.42576	0.0325	upregulated	1	2.00878	0.1342									downregulated	1	0.190053	0.8269	downregulated	1	1.02842	0.3576
peptidoglycan binding	GO	1 out of 8	3.99132													downregulated	1	3.99132	0.0185
steroid hydroxylase activity	GO	4 out of 8	3.98082									downregulated	1	0.772558	0.4618									upregulated	1	0.587507	0.5557	upregulated	1	1.29777	0.2731	upregulated	1	1.32298	0.2663
mammary gland lobule development	GO	2 out of 8	3.98067	downregulated	1	3.82826	0.0217																	upregulated	1	0.152415	0.8586
vitamin metabolic process	GO	6 out of 8	3.97238	upregulated	2	0.135429	0.8733	downregulated	3	1.84122	0.1586	downregulated	6	3.07828	0.046	upregulated	3	2.67273	0.0691	upregulated	1	0.226063	0.7977	upregulated	3	0.355102	0.7011	upregulated	4	0.382063	0.6825	upregulated	5	0.897806	0.4075
steroid binding	GO	3 out of 8	3.95832	upregulated	2	4.77407	0.0084	upregulated	5	2.96017	0.0518	downregulated	6	1.77801	0.169	downregulated	6	5.58034	0.0038	downregulated	2	1.19961	0.3013	upregulated	4	1.66551	0.1891	upregulated	5	0.816029	0.4422	upregulated	3	2.67639	0.0688
RNA polymerase complex	GO	5 out of 8	3.94923	downregulated	3	0.946758	0.388	upregulated	8	2.96162	0.0517	downregulated	9	1.13105	0.3227	downregulated	9	3.88636	0.0205	downregulated	2	0.43239	0.649	downregulated	4	0.129045	0.8789	upregulated	13	0.972845	0.378	upregulated	8	0.535271	0.5855
regulation of cardiac muscle cell action potential	GO	4 out of 8	3.94268	upregulated	1	0.470829	0.6245	downregulated	1	3.69315	0.0249	downregulated	3	2.18601	0.1124	downregulated	1	1.72908	0.1774	downregulated	2	1.35602	0.2577	upregulated	4	2.18563	0.1124	downregulated	5	2.41796	0.0891	downregulated	3	1.60638	0.2006
flagellated sperm motility	GO	5 out of 8	3.93956	upregulated	2	0.412849	0.6618	upregulated	3	1.11687	0.3273	downregulated	1	0.135962	0.8729	downregulated	1	0.204329	0.8152	downregulated	1	0.361571	0.6966	upregulated	5	1.65906	0.1903	upregulated	7	3.34746	0.0352	upregulated	3	0.484042	0.6163
regulation of cAMP-dependent protein kinase activity	GO	3 out of 8	3.9206	upregulated	1	2.27072	0.1032													downregulated	1	2.28499	0.1018	upregulated	3	2.58254	0.0756	upregulated	2	1.95289	0.1419	upregulated	2	1.65589	0.1909
neurotrophin signaling pathway	GO	5 out of 8	3.91913	downregulated	1	1.62249	0.1974					downregulated	3	0.764908	0.4654	downregulated	1	1.0701	0.343					upregulated	4	1.62107	0.1977	upregulated	3	0.898015	0.4074	downregulated	3	2.05745	0.1278
nucleotide catabolic process	GO	3 out of 8	3.90063	upregulated	1	1.09456	0.3347	downregulated	2	0.889058	0.411	downregulated	5	2.66595	0.0695	upregulated	2	1.25653	0.2846	downregulated	2	1.55854	0.2104	upregulated	3	2.02824	0.1316	downregulated	11	2.26324	0.104	upregulated	6	4.25526	0.0142
rRNA binding	GO	6 out of 8	3.8907	upregulated	2	0.220124	0.8024	upregulated	2	0.972176	0.3783	downregulated	4	1.07741	0.3405	downregulated	3	1.14261	0.319	upregulated	1	0.534762	0.5858	upregulated	3	0.365794	0.6936	upregulated	7	0.682047	0.5056	upregulated	6	1.28038	0.2779
ATP hydrolysis coupled anion transmembrane transport	GO	2 out of 8	3.88606	downregulated	1	2.52805	0.0798	downregulated	1	2.68878	0.068	downregulated	1	1.35801	0.2572
sequence-specific single stranded DNA binding	GO	5 out of 8	3.87252	upregulated	3	2.99266	0.0502	upregulated	2	3.11025	0.0446	downregulated	2	3.29168	0.0372	downregulated	2	2.94194	0.0528					upregulated	1	1.68101	0.1862	upregulated	1	1.64008	0.194	upregulated	1	0.420718	0.6566
protein transmembrane transporter activity	GO	1 out of 8	3.8334	upregulated	1	0.518862	0.5952					downregulated	1	6.50167	0.0015									downregulated	2	0.933604	0.3931					downregulated	2	1.21581	0.2965
membrane coat	GO	5 out of 8	3.81558	downregulated	3	1.74875	0.174	downregulated	3	1.20941	0.2984	downregulated	6	1.73587	0.1762	upregulated	2	1.94882	0.1424	upregulated	3	3.71068	0.0245	downregulated	6	2.3543	0.095	downregulated	6	1.93949	0.1438	upregulated	9	1.65348	0.1914
morphogenesis of a polarized epithelium	GO	3 out of 8	3.78986	upregulated	4	4.44625	0.0117	downregulated	2	3.88473	0.0206	upregulated	2	1.1038	0.3316					upregulated	1	1.46477	0.2311	upregulated	3	0.69846	0.4974	upregulated	5	2.35834	0.0946	downregulated	2	0.731707	0.4811
renal filtration	GO	4 out of 8	3.78557									downregulated	2	2.4717	0.0844	downregulated	1	1.92986	0.1452					upregulated	1	0.690924	0.5011	upregulated	1	1.34968	0.2593	downregulated	2	2.6566	0.0702
cohesin complex	GO	2 out of 8	3.7692	downregulated	1	2.26365	0.104	downregulated	1	2.11974	0.1201																					downregulated	1	0.614199	0.5411
selective autophagy	GO	5 out of 8	3.76758	upregulated	1	0.561658	0.5703					upregulated	1	4.52591	0.0108	downregulated	2	1.38756	0.2497	upregulated	1	1.33017	0.2644	upregulated	3	3.04008	0.0478	upregulated	4	2.33688	0.0966	upregulated	3	0.76046	0.4675
regulation of p38MAPK cascade	GO	4 out of 8	3.76659	downregulated	1	3.18558	0.0414	downregulated	1	0.817769	0.4414	downregulated	4	3.80507	0.0223	downregulated	1	0.7624	0.4665	downregulated	2	1.01785	0.3614	downregulated	2	1.13095	0.3227	downregulated	2	1.27556	0.2793	downregulated	1	1.37986	0.2516
ciliary basal body	GO	4 out of 8	3.75647	upregulated	12	5.57714	0.0038	downregulated	2	1.9001	0.1496	upregulated	4	1.91191	0.1478	upregulated	1	1.06667	0.3442	downregulated	4	0.825844	0.4379	upregulated	12	3.41196	0.033	upregulated	16	4.69719	0.0091	upregulated	14	3.12878	0.0438
C21-steroid hormone metabolic process	GO	2 out of 8	3.72369	upregulated	1	1.6237	0.1972					downregulated	1	0.463692	0.629	downregulated	3	4.8837	0.0076
positive regulation of response to DNA damage stimulus	GO	2 out of 8	3.67532	upregulated	6	2.80186	0.0607	upregulated	5	2.30584	0.0997	downregulated	7	1.877	0.153	downregulated	10	8.45006	0.0002	downregulated	4	2.15885	0.1155	downregulated	4	0.991171	0.3711	upregulated	13	4.76259	0.0085	downregulated	2	1.27961	0.2781
L-alpha-amino acid transmembrane transport	GO	5 out of 8	3.66637	upregulated	2	2.31507	0.0988	upregulated	2	3.82459	0.0218	upregulated	3	6.23501	0.002	downregulated	4	2.90011	0.055	upregulated	1	3.0496	0.0474	upregulated	6	3.42155	0.0327	upregulated	6	2.30798	0.0995	upregulated	9	4.36179	0.0128
positive regulation of T-helper 17 type immune response	GO	2 out of 8	3.63109																					upregulated	1	0.945738	0.3884	upregulated	1	2.68535	0.0682
complement binding	GO	3 out of 8	3.61969									downregulated	3	4.46694	0.0115	downregulated	2	4.53967	0.0107					upregulated	1	1.05131	0.3495	upregulated	1	0.547668	0.5783	upregulated	1	2.02071	0.1326
regulation of T-helper 17 cell differentiation	GO	3 out of 8	3.56761									downregulated	1	0.408434	0.6647									upregulated	2	1.16874	0.3108	upregulated	2	2.36302	0.0941	downregulated	1	0.37259	0.6889
neuron migration	GO	3 out of 8	3.55803	upregulated	8	6.82245	0.0011	upregulated	5	2.42464	0.0885	upregulated	7	4.67207	0.0094	downregulated	8	3.98678	0.0186	upregulated	2	1.12922	0.3233	upregulated	10	1.97864	0.1383	downregulated	12	1.71723	0.1796	upregulated	8	2.16739	0.1145
positive regulation of stem cell proliferation	GO	4 out of 8	3.55747	downregulated	3	3.07031	0.0464	upregulated	3	4.96259	0.007	upregulated	1	0.794101	0.452	upregulated	1	1.4557	0.2332	upregulated	2	2.45088	0.0862	upregulated	5	3.02674	0.0485	upregulated	4	2.0219	0.1324	upregulated	3	3.27034	0.038
protein targeting to ER	GO	2 out of 8	3.55328	upregulated	2	0.0264677	0.9739	upregulated	2	0.152463	0.8586	upregulated	2	0.229742	0.7947	upregulated	1	1.20243	0.3005	downregulated	1	0.338216	0.713	downregulated	4	0.17927	0.8359	upregulated	16	1.4369	0.2377	upregulated	17	4.24498	0.0143
mismatch repair complex	GO	2 out of 8	3.53895									downregulated	1	2.16113	0.1152	downregulated	1	1.37782	0.2521
mitochondrial matrix	GO	3 out of 8	3.5328	upregulated	31	4.02122	0.0179	upregulated	22	6.25153	0.0019	upregulated	18	3.42549	0.0325	upregulated	3	0.56279	0.5696	downregulated	6	0.615918	0.5401	upregulated	18	0.804706	0.4472	upregulated	21	0.91602	0.4001	upregulated	32	2.42799	0.0882
sulfate transmembrane transport	GO	3 out of 8	3.53233	upregulated	1	1.15269	0.3158					downregulated	2	2.66613	0.0695									upregulated	1	1.18816	0.3048	upregulated	2	2.09538	0.123	downregulated	1	1.26465	0.2823
endoplasmic reticulum quality control compartment	GO	5 out of 8	3.51451	upregulated	1	0.335616	0.7149	upregulated	3	2.52381	0.0802	downregulated	1	0.149883	0.8608	downregulated	2	1.76939	0.1704					upregulated	2	0.985303	0.3733	upregulated	3	1.36429	0.2556	upregulated	4	2.10508	0.1218
regulation of dendritic cell differentiation	GO	3 out of 8	3.51306									downregulated	1	1.0102	0.3641													upregulated	1	0.922622	0.3975	upregulated	1	1.58024	0.2059
glutathione transferase activity	GO	3 out of 8	3.50062	upregulated	2	2.62671	0.0723	upregulated	1	0.875166	0.4168	downregulated	1	3.82829	0.0217	downregulated	1	4.73817	0.0088					upregulated	1	1.0903	0.3361	upregulated	1	0.903695	0.4051	upregulated	1	1.50662	0.2217
glutathione binding	GO	3 out of 8	3.49663	upregulated	1	1.79567	0.166																	upregulated	1	1.64036	0.1939	upregulated	1	1.55229	0.2118	upregulated	1	2.09964	0.1225
cell-cell adhesion mediator activity	GO	4 out of 8	3.49418	downregulated	2	1.19807	0.3018	upregulated	1	0.739471	0.4774	downregulated	6	6.18877	0.0021	downregulated	2	3.52306	0.0295	downregulated	1	0.897604	0.4075	downregulated	6	4.05931	0.0173	downregulated	5	3.24616	0.0389	upregulated	3	1.52682	0.2172
positive regulation of protein targeting to mitochondrion	GO	4 out of 8	3.48398	upregulated	2	0.842821	0.4305					upregulated	1	0.897687	0.4075	downregulated	2	1.04016	0.3534					upregulated	4	1.39641	0.2475	upregulated	3	1.41939	0.2419	upregulated	3	1.36853	0.2545
sister chromatid cohesion	GO	6 out of 8	3.47336	downregulated	1	2.73175	0.0651	upregulated	2	1.85148	0.157	downregulated	3	0.531269	0.5879	downregulated	1	0.547578	0.5783					upregulated	3	0.505284	0.6033	upregulated	4	0.532713	0.587	upregulated	3	0.476243	0.6211
establishment of planar polarity	GO	3 out of 8	3.46884	upregulated	3	4.39979	0.0123	upregulated	2	2.68208	0.0684	upregulated	2	1.96807	0.1397					upregulated	1	2.00864	0.1342	upregulated	2	1.15802	0.3141	upregulated	3	1.80997	0.1637	downregulated	2	1.50778	0.2214
regulation of T-helper 17 type immune response	GO	3 out of 8	3.43136									downregulated	1	0.371243	0.6899									upregulated	2	1.10072	0.3326	upregulated	2	2.30541	0.0997	downregulated	1	0.34602	0.7075
replicative senescence	GO	3 out of 8	3.4232					upregulated	1	1.8698	0.1542	downregulated	2	2.74256	0.0644	downregulated	1	2.6801	0.0686									upregulated	1	0.267444	0.7653	downregulated	1	0.397106	0.6723
acute inflammatory response	GO	2 out of 8	3.40852	upregulated	1	2.55092	0.078	downregulated	1	0.373854	0.6881	downregulated	6	5.80816	0.003	upregulated	2	3.80052	0.0224					upregulated	5	0.988488	0.3721	upregulated	6	2.42003	0.0889
chromatin DNA binding	GO	5 out of 8	3.40501	upregulated	7	2.18303	0.1127	upregulated	3	0.676893	0.5082	downregulated	12	2.1319	0.1186	upregulated	1	1.89101	0.1509	upregulated	1	2.43227	0.0878	upregulated	8	0.777252	0.4597	upregulated	10	1.67698	0.1869	upregulated	7	1.13754	0.3206
regulation of autophagosome maturation	GO	3 out of 8	3.40355													downregulated	1	1.22357	0.2942					upregulated	1	1.27139	0.2804	upregulated	2	1.94227	0.1434	downregulated	1	1.03369	0.3557
regulation of chemotaxis	GO	2 out of 8	3.3974	upregulated	4	1.87214	0.1538	upregulated	6	4.34453	0.013	downregulated	21	11.8089	7.4e-06	downregulated	13	7.78224	0.0004	downregulated	6	2.71138	0.0664	downregulated	9	3.61697	0.0269	downregulated	13	2.86323	0.0571	downregulated	8	0.78554	0.4559
positive regulation of protein localization to cell surface	GO	4 out of 8	3.39467	downregulated	1	1.84209	0.1585																	upregulated	2	0.795461	0.4514	upregulated	1	0.196149	0.8219	upregulated	1	0.560972	0.5707
Golgi transport complex	GO	2 out of 8	3.33949					downregulated	1	5.1454	0.0058	downregulated	1	0.684802	0.5042									downregulated	2	1.46462	0.2312	downregulated	1	1.02609	0.3584
cell killing	GO	4 out of 8	3.33065	downregulated	3	2.54553	0.0784	upregulated	1	0.209806	0.8107	upregulated	2	0.675532	0.5089	upregulated	1	1.49499	0.2243	upregulated	1	0.454882	0.6345	upregulated	4	0.602033	0.5477	upregulated	6	1.44084	0.2367	upregulated	5	0.832904	0.4348
response to carbohydrate	GO	3 out of 8	3.32557	downregulated	3	4.23207	0.0145	upregulated	7	3.73184	0.0239	downregulated	13	3.54748	0.0288	upregulated	4	4.75076	0.0086	downregulated	5	0.349441	0.7051	downregulated	7	0.928594	0.3951	downregulated	7	0.332036	0.7175	upregulated	10	0.887932	0.4115
stress response to copper ion	GO	2 out of 8	3.29739													downregulated	1	2.51399	0.0809													upregulated	1	0.783399	0.4569
telomerase holoenzyme complex	GO	3 out of 8	3.27488	upregulated	2	1.95552	0.1415	upregulated	2	2.01679	0.1331	downregulated	2	1.03908	0.3538	downregulated	1	1.92653	0.1457					upregulated	3	1.13276	0.3221	upregulated	3	1.62662	0.1966	upregulated	1	0.515499	0.5972
phosphatidylinositol acyl-chain remodeling	GO	3 out of 8	3.27202									downregulated	1	1.73117	0.1771									upregulated	1	0.66551	0.514					upregulated	1	0.87534	0.4167
negative regulation of reactive oxygen species metabolic process	GO	5 out of 8	3.2611	downregulated	4	3.16875	0.0421	upregulated	2	2.17862	0.1132	downregulated	5	1.04869	0.3504	upregulated	1	1.74347	0.1749	upregulated	1	0.753519	0.4707	upregulated	3	1.76454	0.1713	upregulated	5	0.863292	0.4218	downregulated	2	0.415593	0.6599
DNA catabolic process	GO	4 out of 8	3.23658	upregulated	1	0.258468	0.7722	upregulated	2	3.58979	0.0276	downregulated	3	1.01607	0.362	downregulated	1	0.427207	0.6523	upregulated	1	1.49752	0.2237	upregulated	2	0.496445	0.6087	upregulated	1	0.366016	0.6935	upregulated	1	0.876601	0.4162
immunoglobulin complex, circulating	GO	1 out of 8	3.2309	downregulated	2	3.49595	0.0303																					downregulated	1	0.167512	0.8458	downregulated	1	0.0975368	0.9071
insulin receptor binding	GO	3 out of 8	3.20966	upregulated	2	2.76706	0.0628	upregulated	1	2.01078	0.1339	upregulated	2	1.78578	0.1677	downregulated	1	1.21769	0.2959	downregulated	2	1.25425	0.2853	upregulated	3	0.779338	0.4587	upregulated	4	1.60959	0.2	upregulated	3	2.07498	0.1256
cytoplasmic translation	GO	4 out of 8	3.20882	upregulated	2	0.442248	0.6426	upregulated	1	1.07009	0.343	downregulated	3	0.346145	0.7074	downregulated	2	1.36315	0.2559	downregulated	1	0.365508	0.6938	downregulated	2	0.0780783	0.9249	upregulated	5	0.276503	0.7584	upregulated	9	3.17895	0.0416
MHC protein binding	GO	3 out of 8	3.19883	downregulated	1	2.07521	0.1255	upregulated	1	2.26112	0.1042	downregulated	4	6.21452	0.002	downregulated	2	4.11171	0.0164	downregulated	1	2.80959	0.0602	downregulated	1	2.09788	0.1227	downregulated	1	2.03401	0.1308
oxidoreductase activity, acting on paired donors, with incorporation or reduction of molecular oxygen	GO	4 out of 8	3.1977	downregulated	4	1.48768	0.2259	downregulated	3	3.28989	0.0373	downregulated	9	1.41049	0.244	downregulated	8	2.72274	0.0657	downregulated	2	0.399742	0.6705	downregulated	6	1.61296	0.1993	downregulated	6	1.64894	0.1923	downregulated	7	2.05144	0.1285
regulation of amyloid-beta formation	GO	5 out of 8	3.16083					upregulated	1	0.774303	0.461	downregulated	2	1.07067	0.3428	downregulated	1	0.857688	0.4241	downregulated	1	1.86302	0.1552	upregulated	2	2.2294	0.1076	upregulated	2	1.35386	0.2582	upregulated	1	0.286531	0.7509
microtubule associated complex	GO	2 out of 8	3.15955	downregulated	4	2.28662	0.1016	upregulated	10	6.45948	0.0016	downregulated	20	8.03539	0.0003	downregulated	11	4.78375	0.0084	downregulated	2	1.27622	0.2791	upregulated	15	3.6692	0.0255	upregulated	18	4.84948	0.0078	downregulated	7	4.08291	0.0169
mitochondrion localization	GO	4 out of 8	3.15871	downregulated	3	4.46033	0.0116	downregulated	1	0.518979	0.5951	downregulated	3	0.411489	0.6627					upregulated	1	0.753232	0.4708	downregulated	5	1.75294	0.1733	upregulated	2	0.602956	0.5472	downregulated	4	1.23238	0.2916
peripheral nervous system development	GO	2 out of 8	3.12526	upregulated	1	0.593466	0.5524	upregulated	3	3.55212	0.0287	downregulated	13	14.521	4.9e-07	downregulated	3	1.15827	0.314	upregulated	3	2.26379	0.104	downregulated	4	2.50182	0.0819	downregulated	5	3.14667	0.043	downregulated	6	2.7599	0.0633
atrial cardiac muscle cell action potential	GO	3 out of 8	3.11865	upregulated	1	2.71818	0.066					upregulated	1	1.12946	0.3232									upregulated	3	1.95389	0.1417	upregulated	2	2.49294	0.0827	upregulated	1	2.51946	0.0805
regulation of establishment of endothelial barrier	GO	3 out of 8	3.07553	upregulated	1	1.657	0.1907					downregulated	1	1.33362	0.2635									upregulated	1	2.03154	0.1311	upregulated	1	2.20935	0.1098	downregulated	1	0.841983	0.4309
regulation of mesoderm development	GO	3 out of 8	3.06114	upregulated	2	2.61909	0.0729	downregulated	1	1.89971	0.1496	upregulated	1	0.943375	0.3893									upregulated	3	3.22912	0.0396	upregulated	4	2.89866	0.0551	downregulated	3	1.40389	0.2456
telomere maintenance via telomere trimming	GO	2 out of 8	3.05835									downregulated	1	2.33505	0.0968													upregulated	1	0.723299	0.4851
t-circle formation	GO	2 out of 8	3.05835									downregulated	1	2.33505	0.0968													upregulated	1	0.723299	0.4851
oocyte development	GO	4 out of 8	3.04421	downregulated	1	0.640648	0.527	downregulated	1	0.884866	0.4128	downregulated	3	1.65798	0.1905	downregulated	2	1.28974	0.2753									downregulated	1	0.0829991	0.9204	downregulated	3	1.34603	0.2603
replication fork	GO	3 out of 8	3.03224	upregulated	4	2.38265	0.0923	upregulated	4	2.06507	0.1268	downregulated	4	0.745568	0.4745	downregulated	4	1.67351	0.1876	downregulated	1	0.232815	0.7923	upregulated	3	1.25985	0.2837	upregulated	4	1.42013	0.2417	upregulated	2	0.585073	0.5571
histone H3-K4 trimethylation	GO	5 out of 8	3.01517	upregulated	1	0.707958	0.4926	upregulated	1	0.678656	0.5073	downregulated	1	0.497772	0.6079	downregulated	1	0.940783	0.3903					upregulated	2	0.610372	0.5431	upregulated	1	0.562938	0.5695	upregulated	3	1.78992	0.167
adhesion of symbiont to host cell	GO	1 out of 8	2.97304	downregulated	2	3.78603	0.0227																									downregulated	1	0.812987	0.4435
carbohydrate transport	GO	3 out of 8	2.95804	upregulated	3	1.61964	0.198	downregulated	2	1.63165	0.1956	downregulated	3	3.01104	0.0492	downregulated	4	5.26983	0.0051	downregulated	1	0.555358	0.5739	downregulated	3	1.36105	0.2564	downregulated	3	1.25188	0.286	downregulated	7	2.16655	0.1146
establishment of protein localization to vacuole	GO	3 out of 8	2.95163	upregulated	3	1.84125	0.1586	upregulated	1	0.927577	0.3955	downregulated	4	2.59835	0.0744	downregulated	6	5.67081	0.0034	downregulated	2	1.45776	0.2328	downregulated	4	1.88317	0.1521	downregulated	5	2.13919	0.1178	upregulated	6	2.9314	0.0533
regulation of dopaminergic neuron differentiation	GO	1 out of 8	2.94848																					upregulated	1	2.51931	0.0805	upregulated	1	3.53603	0.0291	downregulated	1	0.587555	0.5557
cell leading edge	GO	4 out of 8	2.93512	downregulated	13	3.7926	0.0225	downregulated	10	1.72074	0.1789	downregulated	43	8.58684	0.0002	downregulated	28	9.65505	6.4e-05	downregulated	21	3.10896	0.0446	downregulated	37	6.44502	0.0016	downregulated	36	5.77538	0.0031	downregulated	36	5.49075	0.0041
intraciliary retrograde transport	GO	3 out of 8	2.92371	downregulated	1	1.82736	0.1608					upregulated	1	3.0871	0.0456													upregulated	3	2.57805	0.0759	upregulated	2	1.60539	0.2008
neuron maturation	GO	2 out of 8	2.92305	upregulated	1	0.833725	0.4344					downregulated	6	7.20132	0.0007	downregulated	4	7.02204	0.0009	downregulated	1	2.33517	0.0968	downregulated	2	2.18696	0.1123	downregulated	1	3.02018	0.0488	downregulated	3	2.92427	0.0537
retromer complex	GO	3 out of 8	2.88238									upregulated	1	2.16252	0.115	downregulated	3	2.79091	0.0614	downregulated	1	0.499221	0.607	downregulated	3	1.77161	0.1701	upregulated	5	2.40093	0.0906	upregulated	5	2.12389	0.1196
lipid catabolic process	GO	3 out of 8	2.83627	downregulated	4	3.89207	0.0204	upregulated	14	4.60687	0.01	downregulated	16	5.72851	0.0033	downregulated	11	2.7245	0.0656	downregulated	4	0.878964	0.4152	downregulated	12	1.42885	0.2396	downregulated	14	1.00363	0.3665	downregulated	16	1.59049	0.2038
positive regulation of cell junction assembly	GO	3 out of 8	2.81659	downregulated	2	4.37885	0.0125	upregulated	2	2.56846	0.0767	downregulated	4	2.98326	0.0506	upregulated	1	1.8957	0.1502									downregulated	1	0.141702	0.8679	upregulated	1	0.0603451	0.9414
phospholipase A2 activity (consuming 1,2-dipalmitoylphosphatidylcholine)	GO	3 out of 8	2.811									downregulated	1	1.53854	0.2147									upregulated	1	0.536849	0.5846					upregulated	1	0.735608	0.4792
phospholipase A2 activity consuming 1,2-dioleoylphosphatidylethanolamine)	GO	3 out of 8	2.811									downregulated	1	1.53854	0.2147									upregulated	1	0.536849	0.5846					upregulated	1	0.735608	0.4792
positive regulation of DNA-dependent DNA replication	GO	2 out of 8	2.80934					downregulated	1	2.30901	0.0994																	upregulated	1	0.500328	0.6063
regulation of amyloid-beta clearance	GO	3 out of 8	2.80529					upregulated	1	1.07838	0.3401	downregulated	1	0.598749	0.5495	downregulated	1	3.72511	0.0241					downregulated	1	0.431975	0.6492	downregulated	1	0.417446	0.6587	upregulated	1	0.409242	0.6642
negative regulation of double-strand break repair	GO	4 out of 8	2.78581	upregulated	1	0.339362	0.7122					downregulated	2	0.882873	0.4136	downregulated	2	1.57286	0.2075					upregulated	1	0.40981	0.6638	downregulated	2	0.594393	0.5519	upregulated	2	0.85402	0.4257
regulation of cell cycle G2/M phase transition	GO	5 out of 8	2.7832	upregulated	14	3.57505	0.028	upregulated	14	8.38774	0.0002	downregulated	21	10.3029	3.4e-05	downregulated	10	3.57126	0.0281	upregulated	2	0.722992	0.4853	downregulated	5	0.239803	0.7868	upregulated	13	0.194645	0.8231	upregulated	11	0.193952	0.8237
blastoderm segmentation	GO	4 out of 8	2.7549	downregulated	2	2.87471	0.0564					downregulated	2	2.94345	0.0527	downregulated	1	0.938826	0.3911					upregulated	1	0.365181	0.6941	downregulated	1	0.130392	0.8778	downregulated	4	4.23688	0.0145
negative regulation of extrinsic apoptotic signaling pathway	GO	5 out of 8	2.68693	upregulated	3	1.88	0.1526	upregulated	7	7.32468	0.0007	upregulated	4	2.06219	0.1272	downregulated	7	2.18776	0.1122	upregulated	3	1.88432	0.1519	upregulated	8	3.79851	0.0224	upregulated	11	4.65792	0.0095	upregulated	5	1.42528	0.2404
drug transport	GO	3 out of 8	2.68118	upregulated	5	1.42166	0.2413	downregulated	4	2.53977	0.0789	downregulated	7	9.60236	6.8e-05	downregulated	3	1.13898	0.3201	downregulated	5	2.52804	0.0798	upregulated	10	2.49167	0.0828	downregulated	11	2.57991	0.0758	downregulated	7	4.02221	0.0179
endolysosome membrane	GO	2 out of 8	2.68082					upregulated	1	3.6731	0.0254	downregulated	1	1.1291	0.3233	downregulated	4	9.39934	8.3e-05					downregulated	1	0.785324	0.456	downregulated	2	1.80077	0.1652	downregulated	2	1.58843	0.2042
Golgi-associated vesicle	GO	3 out of 8	2.66487	upregulated	9	4.8122	0.0081	downregulated	3	0.926358	0.396	downregulated	20	12.3701	4.2e-06	downregulated	15	16.3625	7.8e-08	upregulated	3	1.14052	0.3197	upregulated	10	1.03974	0.3535	upregulated	14	1.42463	0.2406	downregulated	9	0.940028	0.3906
negative regulation of endothelial cell apoptotic process	GO	3 out of 8	2.65468	downregulated	1	0.818305	0.4412					downregulated	2	0.910515	0.4023	downregulated	3	4.25831	0.0141	downregulated	1	0.687139	0.503	downregulated	1	0.781211	0.4579	downregulated	1	0.879137	0.4151	downregulated	1	0.984966	0.3735
mesoderm formation	GO	3 out of 8	2.65297	downregulated	2	1.3573	0.2574	upregulated	1	0.353368	0.7023	downregulated	4	4.38574	0.0125	downregulated	2	2.51384	0.081	downregulated	1	0.358492	0.6987	upregulated	6	1.27232	0.2802	upregulated	7	0.690311	0.5014	upregulated	5	1.04884	0.3503
CatSper complex	GO	1 out of 8	2.62523									downregulated	1	2.62523	0.0724
damaged DNA binding	GO	2 out of 8	2.60654	upregulated	5	1.93234	0.1448	upregulated	6	7.82833	0.0004	downregulated	7	3.76026	0.0233	downregulated	4	1.73716	0.176	downregulated	1	0.130169	0.8779	downregulated	1	0.0444632	0.9565	upregulated	6	0.729952	0.4819	upregulated	6	2.05122	0.1286
response to water	GO	3 out of 8	2.59105					downregulated	1	2.63044	0.072	upregulated	1	1.86574	0.1548	downregulated	2	3.58895	0.0276					downregulated	1	1.05553	0.348	upregulated	1	0.299372	0.7413	downregulated	1	1.00644	0.3655
cysteine-type endopeptidase activator activity involved in apoptotic process	GO	4 out of 8	2.57254	downregulated	2	2.81129	0.0601					upregulated	2	3.83158	0.0217	downregulated	2	2.40612	0.0902									upregulated	1	0.686312	0.5034	upregulated	1	0.500391	0.6063
lipoprotein particle	GO	5 out of 8	2.55872					upregulated	2	1.307	0.2706	downregulated	1	0.139817	0.8695	downregulated	1	3.01773	0.0489					upregulated	2	0.505054	0.6035	upregulated	1	0.052457	0.9489	upregulated	1	0.150658	0.8601
enhancer sequence-specific DNA binding	GO	5 out of 8	2.54532	upregulated	3	2.97774	0.0509	downregulated	1	2.38937	0.0917	upregulated	3	0.873644	0.4174	downregulated	4	1.0914	0.3357	downregulated	2	0.92653	0.3959	upregulated	10	1.13629	0.321	upregulated	11	1.3002	0.2725	upregulated	10	1.40597	0.2451
positive regulation of protein import	GO	5 out of 8	2.53811	upregulated	2	1.40847	0.2445	upregulated	1	0.194855	0.823	downregulated	3	1.60563	0.2008	downregulated	2	0.805038	0.4471	downregulated	3	1.54823	0.2126	upregulated	3	0.737052	0.4785	upregulated	4	0.748626	0.473	upregulated	3	1.79332	0.1664
FAD binding	GO	3 out of 8	2.53709	downregulated	1	1.09998	0.3329	downregulated	3	6.73311	0.0012	upregulated	1	1.25898	0.2839	upregulated	2	3.65798	0.0258									upregulated	1	0.34064	0.7113	downregulated	2	0.719687	0.4869
ATP-dependent microtubule motor activity	GO	4 out of 8	2.51424	upregulated	1	1.34154	0.2614	upregulated	1	1.05104	0.3496	downregulated	4	2.239	0.1066	downregulated	1	0.246774	0.7813	downregulated	1	1.33831	0.2623	upregulated	4	3.32941	0.0358	upregulated	8	3.93139	0.0196	downregulated	3	3.50145	0.0302
adaptive immune response based on somatic recombination of immune receptors built from immunoglobulin superfamily domains	GO	3 out of 8	2.48477	downregulated	6	1.88835	0.1513	upregulated	2	1.58414	0.2051	downregulated	12	4.29019	0.0137	downregulated	9	5.48779	0.0041	downregulated	3	0.0917004	0.9124	upregulated	7	0.736952	0.4786	upregulated	9	1.43339	0.2385	upregulated	5	0.406129	0.6662
negative regulation of oxidative stress-induced neuron death	GO	2 out of 8	2.46581									downregulated	2	2.13083	0.1187																	upregulated	1	0.334985	0.7153
endoplasmic reticulum tubular network organization	GO	4 out of 8	2.45646	upregulated	3	5.1678	0.0057					downregulated	2	2.20018	0.1108	downregulated	1	1.16423	0.3122					downregulated	2	2.52366	0.0802	upregulated	3	3.16749	0.0421	upregulated	2	3.61602	0.0269
endothelial cell development	GO	3 out of 8	2.44352	downregulated	2	4.25188	0.0142	upregulated	3	2.44784	0.0865	downregulated	6	2.98385	0.0506	downregulated	3	1.91954	0.1467	upregulated	1	1.03272	0.356	upregulated	6	2.20402	0.1104	upregulated	5	1.91835	0.1468	downregulated	7	2.71157	0.0664
cleavage furrow	GO	4 out of 8	2.43835	upregulated	5	2.22752	0.1078	upregulated	5	2.57113	0.0764	downregulated	3	1.63355	0.1952	downregulated	3	2.03888	0.1302	upregulated	2	1.67979	0.1864	upregulated	6	1.92324	0.1461	upregulated	8	1.59508	0.2029	upregulated	6	2.73022	0.0652
maintenance of location in cell	GO	4 out of 8	2.43348	upregulated	5	2.92391	0.0537	upregulated	8	7.11867	0.0008	downregulated	13	5.67244	0.0034	downregulated	6	5.79076	0.0031	downregulated	3	1.07654	0.3408	upregulated	9	2.22171	0.1084	downregulated	5	0.640624	0.527	upregulated	7	0.508311	0.6015
caspase binding	GO	1 out of 8	2.43037					downregulated	1	2.43037	0.088
phosphatidylinositol bisphosphate binding	GO	4 out of 8	2.42308	downregulated	3	1.10333	0.3318	upregulated	1	2.20788	0.1099	downregulated	9	3.9811	0.0187	downregulated	5	5.73784	0.0032	downregulated	5	2.59585	0.0746	upregulated	10	3.03634	0.048	downregulated	9	2.95274	0.0522	downregulated	8	3.67904	0.0252
regulation of lysosomal lumen pH	GO	2 out of 8	2.40274									downregulated	2	4.6607	0.0095					downregulated	1	1.40752	0.2447	downregulated	1	1.04795	0.3507	downregulated	1	0.525379	0.5913	upregulated	1	0.722877	0.4854
ventral spinal cord development	GO	3 out of 8	2.36406					upregulated	1	1.80114	0.1651	downregulated	3	1.39821	0.247	downregulated	1	0.239384	0.7871	upregulated	2	2.52761	0.0798	upregulated	2	1.7124	0.1804	downregulated	1	1.65905	0.1903	upregulated	3	3.31448	0.0364
ATPase complex	GO	5 out of 8	2.35608	upregulated	5	0.981017	0.3749	upregulated	5	2.27508	0.1028	downregulated	9	0.943842	0.3891	downregulated	2	0.435458	0.647	upregulated	2	1.44613	0.2355	upregulated	11	1.73115	0.1771	downregulated	4	2.06775	0.1265	upregulated	10	3.12335	0.044
humoral immune response mediated by circulating immunoglobulin	GO	2 out of 8	2.30009	downregulated	3	2.46895	0.0847					downregulated	3	3.40797	0.0331	downregulated	4	6.56689	0.0014	downregulated	1	0.109379	0.8964	upregulated	1	0.856303	0.4247	upregulated	1	2.20976	0.1097	downregulated	3	0.656597	0.5186
phagosome maturation	GO	3 out of 8	2.27538	upregulated	1	1.37858	0.2519					upregulated	1	2.90874	0.0545	downregulated	3	3.91336	0.02	upregulated	2	4.47325	0.0114	upregulated	2	2.28799	0.1015	downregulated	2	1.68855	0.1848	downregulated	2	2.42335	0.0886
liver regeneration	GO	6 out of 8	2.26783	downregulated	1	0.496382	0.6087	upregulated	2	5.15002	0.0058	downregulated	5	2.26552	0.1038	upregulated	1	2.21698	0.1089	upregulated	1	1.01031	0.3641	upregulated	5	1.4084	0.2445	upregulated	8	2.62577	0.0724	upregulated	5	1.82845	0.1607
glutathione peroxidase activity	GO	2 out of 8	2.25242					upregulated	1	1.00064	0.3676	downregulated	1	3.98922	0.0185	downregulated	1	4.90008	0.0074					upregulated	1	1.20619	0.2993	upregulated	1	1.04622	0.3513
dendrite extension	GO	3 out of 8	2.23575					upregulated	1	1.47968	0.2277	upregulated	1	2.01647	0.1331	upregulated	1	3.11189	0.0445					upregulated	2	2.23711	0.1068	upregulated	2	1.56156	0.2098	upregulated	2	3.02865	0.0484
toxic substance binding	GO	2 out of 8	2.23313	downregulated	1	2.36425	0.094																	downregulated	1	1.09141	0.3357	downregulated	1	1.033	0.3559	upregulated	1	1.99329	0.1362
negative regulation of bone development	GO	1 out of 8	2.20256									downregulated	1	4.77631	0.0084									downregulated	2	2.57374	0.0762
regulation of rRNA processing	GO	3 out of 8	2.19606					upregulated	1	2.05843	0.1277									upregulated	1	1.61854	0.1982	upregulated	1	1.75617	0.1727	upregulated	1	1.6292	0.1961	downregulated	1	0.749424	0.4726
negative regulation of mesenchymal cell apoptotic process	GO	2 out of 8	2.12093	downregulated	1	1.41175	0.2437					downregulated	1	0.709183	0.492
cyclic nucleotide binding	GO	4 out of 8	2.10805	downregulated	1	2.19944	0.1109					downregulated	3	2.144	0.1172	upregulated	1	1.3485	0.2596	downregulated	1	2.56505	0.0769	upregulated	4	2.05783	0.1277	downregulated	3	2.67338	0.069	upregulated	4	2.29372	0.1009
cell-cell junction organization	GO	4 out of 8	2.10597	upregulated	7	5.60522	0.0037	downregulated	1	3.47627	0.0309	downregulated	12	5.03191	0.0065	downregulated	3	1.49585	0.2241	downregulated	2	0.933066	0.3933	upregulated	8	1.71687	0.1796	downregulated	11	1.99451	0.1361	downregulated	10	1.08214	0.3389
peptide receptor activity	GO	3 out of 8	2.09908	upregulated	3	5.15916	0.0057	upregulated	4	6.06599	0.0023	downregulated	6	4.3608	0.0128	upregulated	3	3.97636	0.0188	upregulated	2	1.3675	0.2547	upregulated	3	0.627552	0.5339	downregulated	3	1.05122	0.3495	upregulated	3	1.15525	0.315
negative regulation of protein serine/threonine kinase activity	GO	3 out of 8	2.08444	upregulated	6	1.45633	0.2331	downregulated	3	1.50158	0.2228	downregulated	11	4.14214	0.0159	downregulated	6	6.23137	0.002	downregulated	7	3.02006	0.0488	downregulated	9	3.81343	0.0221	upregulated	10	3.16411	0.0423	downregulated	9	1.50083	0.2229
interleukin-15-mediated signaling pathway	GO	4 out of 8	2.06946	downregulated	1	1.36403	0.2556					downregulated	1	0.833342	0.4346	upregulated	1	2.06642	0.1266					upregulated	1	0.853825	0.4258	upregulated	1	1.08469	0.338
regulation of trophoblast cell migration	GO	4 out of 8	2.06932	upregulated	1	2.28655	0.1016					downregulated	1	1.54613	0.2131									upregulated	1	0.412068	0.6623	upregulated	2	1.51516	0.2198	upregulated	1	0.882514	0.4137
ATP-dependent DNA helicase activity	GO	3 out of 8	2.06357	upregulated	1	0.243285	0.784	upregulated	5	6.49018	0.0015	downregulated	3	0.786449	0.4555	downregulated	3	2.06254	0.1271					upregulated	3	0.53368	0.5864	upregulated	3	0.926105	0.3961	upregulated	4	0.603787	0.5467
regulation of translation	GO	2 out of 8	2.0538	upregulated	15	0.545738	0.5794	upregulated	21	6.68247	0.0013	upregulated	14	2.54727	0.0783	downregulated	20	3.58786	0.0277	downregulated	14	1.71786	0.1794	downregulated	25	2.91342	0.0543	upregulated	42	2.77901	0.0621	upregulated	38	3.90608	0.0201
regulation of removal of superoxide radicals	GO	2 out of 8	2.0527	upregulated	1	1.76009	0.172	upregulated	1	2.67324	0.069																	upregulated	1	5.82592	0.003	upregulated	1	0.660113	0.5168
co-receptor binding	GO	3 out of 8	2.04767									downregulated	1	1.08404	0.3382	upregulated	1	3.25039	0.0388	upregulated	1	2.76942	0.0627	upregulated	1	1.54825	0.2126	downregulated	1	0.309707	0.7337	upregulated	1	1.2901	0.2752
sex determination	GO	4 out of 8	2.01764	upregulated	1	1.82788	0.1608					downregulated	1	1.44944	0.2347	downregulated	1	1.3283	0.2649									upregulated	2	0.542178	0.5815	upregulated	2	0.525606	0.5912
nuclear envelope	GO	4 out of 8	2.01754	upregulated	29	3.07776	0.0461	upregulated	21	2.80842	0.0603	downregulated	37	6.06532	0.0023	downregulated	27	6.45673	0.0016	upregulated	5	1.33134	0.2641	upregulated	27	0.197866	0.8205	upregulated	40	0.171007	0.8428	upregulated	33	0.317328	0.7281
positive regulation of lymphocyte migration	GO	2 out of 8	2.01259									upregulated	1	1.92715	0.1456	downregulated	3	3.77409	0.023					downregulated	2	0.798169	0.4502	upregulated	3	1.75078	0.1736	downregulated	2	0.786953	0.4552
lymphocyte migration	GO	5 out of 8	2.00867	downregulated	2	1.66779	0.1887	upregulated	1	1.19732	0.302					downregulated	1	0.900152	0.4065					upregulated	1	0.0869784	0.9167	upregulated	2	0.483087	0.6169	upregulated	1	0.0679848	0.9343
regulation of defense response to virus	GO	6 out of 8	1.99012	downregulated	2	1.31053	0.2697	upregulated	7	5.42643	0.0044	downregulated	5	2.05139	0.1286	downregulated	3	1.85354	0.1567	upregulated	1	0.555301	0.5739	upregulated	5	0.848571	0.428	upregulated	5	1.28177	0.2775	downregulated	2	0.484542	0.616
protein deacetylase activity	GO	5 out of 8	1.98065	upregulated	3	2.37522	0.093	upregulated	2	1.68019	0.1863	downregulated	3	0.37496	0.6873	upregulated	1	1.78614	0.1676	upregulated	2	1.63316	0.1953	upregulated	4	1.76408	0.1713	upregulated	7	2.86089	0.0572	upregulated	4	1.18911	0.3045
histone binding	GO	2 out of 8	1.97392	upregulated	14	2.43839	0.0873	upregulated	17	7.50062	0.0006	upregulated	5	1.28078	0.2778	upregulated	5	2.88803	0.0557	downregulated	4	3.30871	0.0366	downregulated	6	2.31205	0.0991	upregulated	30	8.96108	0.0001	upregulated	30	10.4294	3e-05
negative regulation of amyloid precursor protein catabolic process	GO	4 out of 8	1.97218					upregulated	1	1.07838	0.3401	downregulated	2	1.62926	0.1961									upregulated	1	0.623939	0.5358	upregulated	1	0.287389	0.7502	upregulated	1	0.50997	0.6005
negative regulation of cold-induced thermogenesis	GO	6 out of 8	1.96961	downregulated	1	0.38156	0.6828	upregulated	4	6.27577	0.0019	upregulated	2	3.50401	0.0301	downregulated	3	2.60844	0.0736	upregulated	1	3.13941	0.0433	upregulated	6	2.91474	0.0542	upregulated	5	2.15226	0.1162	upregulated	3	0.552993	0.5752
hydrolase activity, hydrolyzing O-glycosyl compounds	GO	3 out of 8	1.90494	downregulated	3	2.07712	0.1253	upregulated	2	0.342424	0.71	downregulated	11	6.54647	0.0014	downregulated	7	6.72337	0.0012	upregulated	1	0.652397	0.5208	upregulated	4	0.807894	0.4458	upregulated	4	0.593601	0.5523	downregulated	1	0.14895	0.8616
multicellular organismal homeostasis	GO	4 out of 8	1.90353	upregulated	11	2.87607	0.0564	upregulated	10	4.35325	0.0129	downregulated	18	4.97685	0.0069	downregulated	12	5.55289	0.0039	downregulated	11	3.5726	0.0281	downregulated	14	2.01923	0.1328	upregulated	20	3.26318	0.0383	upregulated	19	0.931763	0.3939
vitamin biosynthetic process	GO	4 out of 8	1.90279	upregulated	1	0.909965	0.4025	upregulated	1	0.984474	0.3736	upregulated	1	1.60011	0.2019					upregulated	1	1.54424	0.2135	upregulated	1	1.17684	0.3083	upregulated	1	1.01646	0.3619	upregulated	3	1.65981	0.1902
response to pH	GO	3 out of 8	1.87972	downregulated	1	5.8089	0.003	upregulated	1	1.84783	0.1576	downregulated	2	2.33112	0.0972	downregulated	1	4.01812	0.018	downregulated	1	1.47775	0.2281	downregulated	2	2.10907	0.1214	downregulated	2	3.20416	0.0406	downregulated	2	1.63961	0.1941
p53 binding	GO	3 out of 8	1.87338					downregulated	1	0.586329	0.5564	downregulated	6	2.92639	0.0536	downregulated	3	1.18274	0.3064	downregulated	1	1.29404	0.2742	upregulated	6	1.29813	0.273	upregulated	8	1.10188	0.3322	upregulated	5	0.76741	0.4642
regulation of ATP metabolic process	GO	5 out of 8	1.85845	upregulated	5	2.43838	0.0873	downregulated	2	4.19264	0.0151	downregulated	4	1.56501	0.2091	downregulated	2	1.3057	0.271	downregulated	4	3.95248	0.0192	downregulated	6	2.62494	0.0724	upregulated	6	1.12766	0.3238	upregulated	10	2.68323	0.0683
MKS complex	GO	4 out of 8	1.85573	upregulated	4	5.68424	0.0034	downregulated	1	2.39737	0.091					upregulated	1	2.17699	0.1134					upregulated	2	0.961805	0.3822	upregulated	3	3.62407	0.0267	upregulated	2	2.7337	0.065
cobalamin binding	GO	1 out of 8	1.83314													downregulated	1	1.83314	0.1599
cell aging	GO	6 out of 8	1.81757	upregulated	3	1.96948	0.1395	upregulated	3	1.65623	0.1909	downregulated	4	1.04978	0.35	downregulated	2	1.21989	0.2953	upregulated	1	1.34106	0.2616	upregulated	3	0.75013	0.4723	upregulated	7	0.929629	0.3947	upregulated	2	0.152804	0.8583
positive regulation of TORC1 signaling	GO	2 out of 8	1.81474	downregulated	1	2.02457	0.1321	upregulated	1	2.81129	0.0601					downregulated	2	3.22903	0.0396									downregulated	1	0.627562	0.5339
nail development	GO	1 out of 8	1.79435	downregulated	1	2.65338	0.0704																									downregulated	1	0.859028	0.4236
endoplasmic reticulum unfolded protein response	GO	4 out of 8	1.7693	downregulated	2	3.25963	0.0384	upregulated	5	1.19545	0.3026	upregulated	5	2.20809	0.1099	downregulated	3	0.706283	0.4935	downregulated	1	0.179638	0.8356	downregulated	4	0.422359	0.6555	upregulated	5	1.0209	0.3603	upregulated	5	0.365655	0.6937
interleukin-7-mediated signaling pathway	GO	3 out of 8	1.75342	upregulated	2	2.91178	0.0544					downregulated	2	1.12835	0.3236					downregulated	1	1.92282	0.1462	downregulated	1	1.5308	0.2164	upregulated	3	2.14163	0.1175	upregulated	2	0.406272	0.6661
positive regulation of establishment of protein localization	GO	4 out of 8	1.75123	downregulated	10	1.00431	0.3663	upregulated	14	2.50234	0.0819	downregulated	28	2.29882	0.1004	downregulated	19	5.76786	0.0031	downregulated	16	3.15209	0.0428	downregulated	29	2.64394	0.0711	upregulated	32	2.26813	0.1035	downregulated	22	3.79186	0.0226
RNA export from nucleus	GO	3 out of 8	1.72252	downregulated	2	0.184168	0.8318	upregulated	8	2.64748	0.0708	upregulated	6	3.52958	0.0293	downregulated	10	4.90268	0.0074	upregulated	1	0.897073	0.4078	downregulated	8	0.358847	0.6985	upregulated	12	0.236208	0.7896	upregulated	11	0.948086	0.3875
regulation of relaxation of muscle	GO	3 out of 8	1.71436					upregulated	1	1.93779	0.144	upregulated	1	1.44821	0.235									upregulated	1	0.47273	0.6233	upregulated	1	2.07363	0.1257	upregulated	1	2.55399	0.0778
negative regulation of cardiac muscle cell differentiation	GO	3 out of 8	1.70555	upregulated	1	1.80704	0.1641					downregulated	1	1.61973	0.198					upregulated	2	3.39013	0.0337	upregulated	3	3.52142	0.0296	upregulated	3	2.72121	0.0658	downregulated	3	4.34978	0.0129
positive regulation of cytokine production	GO	2 out of 8	1.70165	downregulated	15	3.33938	0.0355	upregulated	14	4.58748	0.0102	downregulated	33	5.61829	0.0036	downregulated	25	18.9162	6.1e-09	upregulated	8	2.36763	0.0937	downregulated	10	1.31059	0.2697	upregulated	22	2.25924	0.1044	downregulated	13	2.92522	0.0537
regulation of hepatocyte proliferation	GO	4 out of 8	1.67363					upregulated	2	3.98015	0.0187	downregulated	1	1.25105	0.2862					upregulated	1	1.6186	0.1982	upregulated	1	2.76249	0.0631	upregulated	2	1.88158	0.1523	downregulated	1	1.85995	0.1557
DNA replication factor A complex	GO	2 out of 8	1.67053	upregulated	1	1.18687	0.3052	upregulated	1	0.97786	0.3761	downregulated	1	0.584345	0.5575	downregulated	1	0.912442	0.4015									upregulated	1	0.235868	0.7899	upregulated	1	1.43466	0.2382
response to thyroid hormone	GO	3 out of 8	1.64284					upregulated	2	2.17096	0.1141	upregulated	2	3.18665	0.0413	downregulated	3	4.45979	0.0116					downregulated	1	0.131099	0.8771	upregulated	4	1.6991	0.1828	upregulated	1	0.972654	0.3781
regulation of heart morphogenesis	GO	4 out of 8	1.64128	upregulated	5	4.22725	0.0146	upregulated	1	0.695342	0.4989	upregulated	3	2.84545	0.0581	downregulated	2	2.12108	0.1199	downregulated	2	1.87888	0.1528	upregulated	4	3.13947	0.0433	upregulated	4	4.66825	0.0094	upregulated	2	1.3594	0.2568
mRNA cleavage involved in mRNA processing	GO	2 out of 8	1.61734					upregulated	1	1.2631	0.2828	upregulated	1	1.68158	0.1861	downregulated	1	1.78298	0.1681									upregulated	2	1.09746	0.3337
transcription factor TFIID complex	GO	2 out of 8	1.60526	upregulated	3	2.24306	0.1061	upregulated	2	3.26491	0.0382	upregulated	1	0.778685	0.459	upregulated	1	4.52408	0.0108	downregulated	2	1.80757	0.1641	downregulated	2	1.09469	0.3346	upregulated	8	3.59649	0.0274	upregulated	3	0.911035	0.4021
myofibril assembly	GO	3 out of 8	1.60432	upregulated	2	2.4723	0.0844	downregulated	1	0.716317	0.4885	downregulated	5	4.37864	0.0125	downregulated	2	3.43822	0.0321	downregulated	2	1.62101	0.1977	upregulated	6	1.65399	0.1913	upregulated	7	2.69866	0.0673	downregulated	7	2.83556	0.0587
positive regulation of endothelial cell chemotaxis	GO	2 out of 8	1.6026	downregulated	1	4.07441	0.017	downregulated	1	2.0926	0.1234									downregulated	1	1.79772	0.1657	downregulated	1	1.33608	0.2629	downregulated	1	1.43061	0.2392
regulation of fibroblast apoptotic process	GO	4 out of 8	1.58747	upregulated	3	2.6379	0.0715	downregulated	1	1.32426	0.266	upregulated	1	0.808017	0.4457									upregulated	2	0.520836	0.594	upregulated	1	1.02678	0.3582	upregulated	4	2.1615	0.1152
monosaccharide binding	GO	4 out of 8	1.56225	downregulated	2	1.07472	0.3414	upregulated	4	2.12577	0.1193	downregulated	4	0.886466	0.4121	downregulated	4	2.24132	0.1063					upregulated	3	0.0895029	0.9144	downregulated	4	0.322205	0.7245	downregulated	2	0.281792	0.7544
negative regulation of telomere maintenance via telomere lengthening	GO	5 out of 8	1.56146	upregulated	3	2.52944	0.0797	upregulated	1	1.97137	0.1393	downregulated	2	1.22908	0.2926	downregulated	1	1.07894	0.34					upregulated	3	0.570242	0.5654	upregulated	6	1.9856	0.1373	upregulated	4	1.19839	0.3017
positive regulation of protein insertion into mitochondrial membrane involved in apoptotic signaling pathway	GO	4 out of 8	1.56046	downregulated	2	1.8526	0.1568	downregulated	1	1.3178	0.2677	upregulated	2	1.62611	0.1967	downregulated	1	0.642298	0.5261					downregulated	1	0.762021	0.4667	downregulated	1	0.435956	0.6466	upregulated	2	0.571846	0.5645
regulation of oogenesis	GO	2 out of 8	1.55893									downregulated	3	3.4773	0.0309	upregulated	1	2.40584	0.0902													upregulated	1	0.487468	0.6142
positive regulation of extrinsic apoptotic signaling pathway	GO	6 out of 8	1.54641	upregulated	2	0.13996	0.8694	upregulated	4	9.37475	8.5e-05	downregulated	4	0.674418	0.5095	downregulated	5	2.36099	0.0943	upregulated	1	1.89853	0.1498	upregulated	3	2.05884	0.1276	upregulated	4	1.53877	0.2146	upregulated	3	2.52957	0.0797
helicase activity	GO	2 out of 8	1.54357	downregulated	1	0.369073	0.6914	upregulated	14	8.40174	0.0002	downregulated	11	0.89693	0.4078	downregulated	8	1.81673	0.1626	downregulated	2	0.337228	0.7137	downregulated	4	0.11187	0.8942	upregulated	12	0.572386	0.5642	upregulated	10	1.42028	0.2416
negative regulation of adherens junction organization	GO	5 out of 8	1.54098	upregulated	1	2.42741	0.0883					downregulated	2	1.65596	0.1909	upregulated	1	3.02745	0.0484	upregulated	1	2.32536	0.0977	upregulated	1	1.04061	0.3532	upregulated	3	1.05848	0.347	upregulated	2	0.915434	0.4003
negative regulation of double-strand break repair via homologous recombination	GO	3 out of 8	1.53092	upregulated	1	0.74698	0.4738					downregulated	2	1.80606	0.1643	downregulated	1	1.127	0.324					downregulated	1	0.628888	0.5332	downregulated	2	1.42636	0.2402	upregulated	1	1.40008	0.2466
cytidine deaminase activity	GO	1 out of 8	1.49296	downregulated	1	2.36425	0.094	upregulated	1	2.83587	0.0587																					upregulated	1	1.49296	0.2247
calcineurin-mediated signaling	GO	4 out of 8	1.48828	downregulated	1	1.58623	0.2047					upregulated	1	2.95299	0.0522	downregulated	1	1.33574	0.263					upregulated	1	0.474143	0.6224	upregulated	2	1.32187	0.2666	downregulated	1	0.276718	0.7583
hydrolase activity, acting on carbon-nitrogen (but not peptide) bonds, in cyclic amidines	GO	5 out of 8	1.48164	downregulated	1	1.19104	0.3039	upregulated	2	1.73616	0.1762	downregulated	3	4.89983	0.0074	downregulated	1	0.882383	0.4138					upregulated	1	0.12219	0.885	upregulated	2	0.511008	0.5999	downregulated	2	4.38865	0.0124
glycosaminoglycan binding	GO	3 out of 8	1.47334	downregulated	4	1.62252	0.1974	upregulated	8	2.60084	0.0742	downregulated	11	1.77883	0.1688	downregulated	7	5.56597	0.0038	upregulated	1	0.462172	0.6299	upregulated	12	0.468125	0.6262	upregulated	11	0.714252	0.4896	downregulated	6	0.171211	0.8426
protein transmembrane transport	GO	2 out of 8	1.47107	upregulated	3	0.49346	0.6105	upregulated	2	0.937712	0.3915	downregulated	1	5.24638	0.0053					downregulated	1	0.180946	0.8345	downregulated	7	1.78087	0.1685	upregulated	2	0.320283	0.7259	downregulated	4	0.702599	0.4953
keratinization	GO	2 out of 8	1.45481	downregulated	3	1.93196	0.1449	downregulated	2	2.94841	0.0524	upregulated	2	1.64584	0.1929	upregulated	2	1.45288	0.2339					downregulated	2	0.023857	0.9764	downregulated	2	0.0534462	0.948	downregulated	6	0.249546	0.7792
positive regulation of viral process	GO	4 out of 8	1.4423	upregulated	3	0.241044	0.7858	upregulated	6	3.44307	0.032	downregulated	6	2.10204	0.1222	downregulated	3	0.991549	0.371	downregulated	1	0.167127	0.8461	upregulated	5	0.532608	0.5871	downregulated	4	0.415062	0.6603	upregulated	11	2.08241	0.1246
regulation of neutrophil migration	GO	2 out of 8	1.42764					upregulated	1	0.86054	0.4229	downregulated	6	7.20132	0.0007	downregulated	5	5.89694	0.0027	downregulated	2	3.47214	0.0311	downregulated	3	2.49449	0.0825	downregulated	3	2.78183	0.0619	downregulated	2	2.06162	0.1272
negative regulation of cellular senescence	GO	3 out of 8	1.41945					upregulated	1	0.659439	0.5171	downregulated	1	0.418495	0.658					downregulated	1	0.918256	0.3992	upregulated	2	1.90028	0.1495	upregulated	2	2.41431	0.0894	downregulated	1	1.73594	0.1762
ribosomal large subunit biogenesis	GO	4 out of 8	1.41701	upregulated	1	0.0606725	0.9411	upregulated	4	1.41084	0.2439	downregulated	2	0.196236	0.8218	downregulated	2	0.566125	0.5677	downregulated	1	0.0911372	0.9129	downregulated	3	0.124275	0.8831	upregulated	5	0.24801	0.7804	upregulated	9	2.09356	0.1232
protein kinase complex	GO	5 out of 8	1.41211	upregulated	8	3.20505	0.0406	upregulated	5	4.7877	0.0083	downregulated	10	2.00647	0.1345	downregulated	6	1.33196	0.264	downregulated	4	1.55444	0.2113	upregulated	9	1.8232	0.1615	upregulated	17	2.46671	0.0849	upregulated	12	1.77653	0.1692
cellular response to hepatocyte growth factor stimulus	GO	4 out of 8	1.41076	downregulated	1	2.47996	0.0837	upregulated	1	2.28457	0.1018	upregulated	1	2.40205	0.0905									upregulated	1	0.828693	0.4366	upregulated	2	2.14625	0.1169	upregulated	1	0.642472	0.526
inflammatory response to antigenic stimulus	GO	2 out of 8	1.39119	downregulated	2	1.99304	0.1363	downregulated	1	0.995477	0.3695	downregulated	3	2.37434	0.0931	downregulated	1	1.14169	0.3193									upregulated	1	0.427606	0.6521	upregulated	1	0.963582	0.3815
mitochondrial transmembrane transport	GO	4 out of 8	1.39096	upregulated	2	0.45452	0.6348	downregulated	2	1.30171	0.2721	downregulated	2	0.687201	0.503	downregulated	1	0.739342	0.4774	downregulated	2	1.41615	0.2426	downregulated	7	1.60743	0.2004	downregulated	3	0.950741	0.3865	upregulated	7	3.09154	0.0454
photoreceptor disc membrane	GO	2 out of 8	1.38648									downregulated	1	1.14192	0.3192	downregulated	1	1.4898	0.2254													downregulated	2	1.24524	0.2879
structural constituent of muscle	GO	3 out of 8	1.35951					downregulated	1	1.01859	0.3611	downregulated	3	5.16714	0.0057	downregulated	3	3.83603	0.0216	downregulated	2	2.13735	0.118	downregulated	3	2.1713	0.114	downregulated	4	2.62141	0.0727	downregulated	5	1.73219	0.1769
oocyte maturation	GO	2 out of 8	1.35908	upregulated	1	0.89606	0.4082					downregulated	3	3.12389	0.044	downregulated	2	2.21773	0.1089									upregulated	1	0.219766	0.8027	upregulated	2	1.13932	0.32
nucleoid	GO	4 out of 8	1.35388	downregulated	1	0.697924	0.4976	upregulated	2	1.3941	0.2481	downregulated	1	0.824053	0.4387	downregulated	2	1.1818	0.3067					downregulated	2	0.183801	0.8321	downregulated	1	0.0435862	0.9573	upregulated	3	0.271587	0.7622
nucleus organization	GO	5 out of 8	1.35385	downregulated	2	1.60979	0.1999	upregulated	7	1.29946	0.2727	downregulated	10	0.708888	0.4922	downregulated	10	3.26638	0.0381	downregulated	4	3.72783	0.024	upregulated	9	2.73837	0.0647	downregulated	6	2.28683	0.1016	upregulated	7	0.344547	0.7085
response to platelet-derived growth factor	GO	4 out of 8	1.3477					upregulated	1	1.64601	0.1928	upregulated	1	2.9378	0.053	downregulated	2	1.92671	0.1456					upregulated	1	0.493508	0.6105	upregulated	4	1.95286	0.1419	upregulated	3	1.55843	0.2105
positive regulation of cell cycle	GO	5 out of 8	1.31815	upregulated	14	0.737738	0.4782	upregulated	17	4.33596	0.0131	downregulated	32	4.36522	0.0127	downregulated	18	1.46134	0.2319	upregulated	6	0.160723	0.8515	upregulated	27	0.793358	0.4523	upregulated	38	0.838279	0.4325	downregulated	18	1.22707	0.2932
epithelial cell maturation	GO	2 out of 8	1.31574	upregulated	1	0.659615	0.5171	upregulated	1	5.93152	0.0027	upregulated	1	1.20244	0.3005					downregulated	1	2.89932	0.0551	downregulated	1	1.57958	0.2061	upregulated	3	2.28877	0.1014	upregulated	2	1.92629	0.1457
positive regulation of mitochondrial membrane permeability involved in apoptotic process	GO	4 out of 8	1.30793	downregulated	1	1.48679	0.2261									upregulated	1	3.13284	0.0436					upregulated	1	0.663566	0.515	upregulated	1	1.28171	0.2776	upregulated	2	1.0087	0.3647
regulation of neural precursor cell proliferation	GO	5 out of 8	1.30431	upregulated	2	2.56532	0.0769	upregulated	4	4.19528	0.0151	downregulated	4	3.48498	0.0307	downregulated	2	1.38543	0.2502	upregulated	2	1.55681	0.2108	upregulated	5	1.33718	0.2626	upregulated	7	1.14119	0.3194	upregulated	4	2.64431	0.0711
synaptonemal complex assembly	GO	2 out of 8	1.29445	upregulated	1	0.89606	0.4082	downregulated	1	1.37664	0.2524					downregulated	1	0.813867	0.4431
negative regulation of endoplasmic reticulum stress-induced intrinsic apoptotic signaling pathway	GO	2 out of 8	1.23342	upregulated	1	1.01904	0.3609	downregulated	2	3.46905	0.0311									downregulated	1	1.15509	0.315	downregulated	1	0.818166	0.4412	downregulated	1	0.355717	0.7007	upregulated	2	1.11239	0.3288
RNA helicase activity	GO	2 out of 8	1.22728	upregulated	2	0.590479	0.5541	downregulated	1	1.10549	0.331	downregulated	1	0.0461803	0.9549	upregulated	1	0.973723	0.3777	downregulated	2	1.61253	0.1994	downregulated	3	1.03067	0.3568	upregulated	5	1.42974	0.2394	upregulated	5	2.44074	0.0871
photoreceptor cell maintenance	GO	5 out of 8	1.21747	upregulated	1	1.17608	0.3085	upregulated	2	2.51812	0.0806	downregulated	1	0.801393	0.4487	downregulated	1	2.09303	0.1233	downregulated	2	1.58018	0.2059	upregulated	2	1.48472	0.2266	upregulated	1	0.698892	0.4971	upregulated	3	1.4138	0.2432
neuron projection fasciculation	GO	4 out of 8	1.20598	downregulated	1	2.20648	0.1101	downregulated	1	1.46325	0.2315	downregulated	2	3.64803	0.026	downregulated	2	3.17265	0.0419	downregulated	1	1.67086	0.1881	downregulated	3	3.51171	0.0298	downregulated	4	3.56483	0.0283	downregulated	2	0.537025	0.5845
DNA helicase activity	GO	3 out of 8	1.20045	upregulated	2	0.552895	0.5753	upregulated	7	7.73611	0.0004	downregulated	4	0.948501	0.3873	downregulated	3	1.57791	0.2064					upregulated	3	0.300163	0.7407	upregulated	3	0.549361	0.5773	upregulated	4	0.350922	0.704
determination of bilateral symmetry	GO	5 out of 8	1.19188	upregulated	12	8.32668	0.0002	downregulated	2	2.07053	0.1261	downregulated	6	3.88499	0.0205	upregulated	2	1.34103	0.2616	downregulated	3	1.83565	0.1595	upregulated	11	2.33545	0.0968	upregulated	11	2.75268	0.0638	upregulated	6	1.65158	0.1917
immunological synapse	GO	2 out of 8	1.18571	downregulated	1	0.991637	0.371	upregulated	1	1.79368	0.1663	downregulated	6	6.79312	0.0011	downregulated	3	5.26181	0.0052					upregulated	3	0.55935	0.5716	upregulated	3	0.626355	0.5345
regulation of fertilization	GO	3 out of 8	1.18139									downregulated	2	2.27079	0.1032	upregulated	1	2.03509	0.1307					upregulated	1	0.366362	0.6933	upregulated	1	0.579338	0.5603
RNA polymerase II activity	GO	1 out of 8	1.16872									downregulated	1	1.78356	0.168													downregulated	1	0.614846	0.5407
chromosome, telomeric region	GO	3 out of 8	1.15504	upregulated	6	0.743166	0.4756	upregulated	16	15.1307	2.7e-07	downregulated	12	3.9867	0.0186	downregulated	13	10.2421	3.6e-05					upregulated	7	0.475491	0.6216	upregulated	11	0.23807	0.7881	upregulated	11	0.441483	0.6431
negative regulation of NIK/NF-kappaB signaling	GO	3 out of 8	1.15379	downregulated	1	0.950045	0.3867	upregulated	1	0.726799	0.4835	downregulated	1	0.29479	0.7447													upregulated	1	0.635758	0.5295
structural constituent of eye lens	GO	1 out of 8	1.14122									downregulated	1	2.09496	0.1231	upregulated	1	2.03509	0.1307													upregulated	2	1.14122	0.3194
adenosine deaminase activity	GO	2 out of 8	1.13895					upregulated	1	1.51876	0.219	downregulated	2	6.02619	0.0024	downregulated	1	1.8412	0.1586									upregulated	1	0.459429	0.6316	upregulated	1	0.679521	0.5069
xenobiotic metabolic process	GO	4 out of 8	1.1216	upregulated	4	0.498111	0.6077	upregulated	1	0.0780723	0.9249	downregulated	5	0.398796	0.6711	upregulated	2	1.88269	0.1522					upregulated	3	0.315728	0.7293	upregulated	2	0.447838	0.639	upregulated	5	2.41811	0.0891
cyclosporin A binding	GO	2 out of 8	1.12069									upregulated	1	1.19155	0.3037									downregulated	3	1.43599	0.2379	upregulated	2	0.746888	0.4738	upregulated	4	1.80979	0.1637
establishment or maintenance of monopolar cell polarity	GO	3 out of 8	1.11227	downregulated	1	1.05968	0.3466	downregulated	1	4.6227	0.0098	downregulated	1	0.364645	0.6944					downregulated	1	0.694345	0.4994	downregulated	3	1.6362	0.1947	downregulated	3	1.90785	0.1484	downregulated	1	0.696355	0.4984
T cell migration	GO	2 out of 8	1.08353																					upregulated	1	0.490061	0.6126	upregulated	1	0.593468	0.5524
midbody	GO	3 out of 8	1.06513	upregulated	12	2.9596	0.0518	downregulated	3	5.96984	0.0026	downregulated	18	3.95039	0.0192	downregulated	8	1.45166	0.2342	downregulated	5	2.74607	0.0642	downregulated	10	1.22362	0.2942	downregulated	10	0.921761	0.3978	downregulated	5	2.45572	0.0858
positive regulation of regulated secretory pathway	GO	3 out of 8	1.06066	downregulated	1	0.54378	0.5805	upregulated	2	1.68469	0.1855	downregulated	5	5.97738	0.0025	downregulated	4	7.75316	0.0004	downregulated	1	0.565825	0.5679	downregulated	6	3.15563	0.0426	downregulated	5	4.20881	0.0149	downregulated	4	3.59871	0.0274
replisome	GO	4 out of 8	1.06031	upregulated	2	2.05941	0.1275	upregulated	3	2.9886	0.0504	downregulated	3	1.97805	0.1383	downregulated	3	3.03116	0.0483									upregulated	1	0.0814072	0.9218	upregulated	1	1.0177	0.3614
inner cell mass cell proliferation	GO	1 out of 8	1.0563	upregulated	1	2.11849	0.1202	upregulated	1	3.58621	0.0277																					upregulated	1	1.0563	0.3477
neurological system process involved in regulation of systemic arterial blood pressure	GO	3 out of 8	1.05567									upregulated	2	2.82227	0.0595									upregulated	1	0.518854	0.5952	upregulated	1	0.167127	0.8461	upregulated	1	0.369693	0.6909
DNA repair	GO	3 out of 8	1.0363	upregulated	30	2.97728	0.0509	upregulated	30	10.8195	2e-05	downregulated	32	2.09329	0.1233	downregulated	25	4.833	0.008	downregulated	4	0.0104296	0.9896	upregulated	24	0.0577139	0.9439	upregulated	40	0.39663	0.6726	upregulated	34	0.592381	0.553
retina vasculature morphogenesis in camera-type eye	GO	2 out of 8	1.02474	downregulated	1	2.93825	0.053					upregulated	1	1.83239	0.16									upregulated	1	0.3931	0.675					downregulated	1	0.474216	0.6224
positive regulation of anion transport	GO	3 out of 8	0.993732	upregulated	3	1.14051	0.3197	upregulated	3	1.50695	0.2216	downregulated	4	3.13943	0.0433	downregulated	3	3.47825	0.0309	upregulated	1	2.28286	0.102	downregulated	4	2.24573	0.1059	downregulated	4	1.7266	0.1779	downregulated	1	1.28702	0.2761
site of double-strand break	GO	4 out of 8	0.984961	upregulated	3	1.29758	0.2732	upregulated	3	1.60264	0.2014	upregulated	1	0.382569	0.6821	downregulated	4	3.1538	0.0427					upregulated	1	0.161587	0.8508	upregulated	3	0.474573	0.6222	upregulated	3	0.477788	0.6202
response to xenobiotic stimulus	GO	3 out of 8	0.9792	downregulated	5	3.77494	0.0229	upregulated	9	3.24854	0.0388	upregulated	7	1.86658	0.1547	downregulated	7	1.66861	0.1885	downregulated	9	0.846647	0.4289	downregulated	19	1.85185	0.1569	downregulated	17	0.810364	0.4447	upregulated	14	0.91109	0.4021
nuclear transport	GO	6 out of 8	0.962719	downregulated	4	0.213085	0.8081	upregulated	17	4.05466	0.0173	upregulated	9	1.43374	0.2384	downregulated	16	3.97898	0.0187	upregulated	1	0.394759	0.6738	upregulated	16	0.205104	0.8146	upregulated	30	0.932955	0.3934	upregulated	21	0.726231	0.4837
CD40 receptor complex	GO	1 out of 8	0.958655	upregulated	1	1.23234	0.2916					upregulated	1	2.16087	0.1152	downregulated	2	3.14357	0.0431													downregulated	1	0.952572	0.3857
peroxidase activity	GO	2 out of 8	0.953963	downregulated	1	0.803425	0.4478	downregulated	1	1.26604	0.2819	downregulated	4	6.98698	0.0009	downregulated	3	4.10526	0.0165					upregulated	1	0.540324	0.5826	upregulated	1	0.413639	0.6612
pigment granule organization	GO	3 out of 8	0.953526	downregulated	1	0.848355	0.4281					upregulated	2	2.10306	0.1221					downregulated	2	2.95321	0.0522	downregulated	2	1.76892	0.1705	upregulated	3	1.33522	0.2631	upregulated	4	3.82622	0.0218
endosome to melanosome transport	GO	2 out of 8	0.905317																	downregulated	1	1.75094	0.1736	downregulated	1	1.3416	0.2614	upregulated	1	0.92717	0.3957	upregulated	2	3.07069	0.0464
intramolecular oxidoreductase activity	GO	4 out of 8	0.888335	downregulated	1	1.30421	0.2714	upregulated	2	1.74368	0.1749	upregulated	2	1.25655	0.2846	downregulated	1	1.76015	0.172					upregulated	1	0.456833	0.6333	upregulated	2	1.03393	0.3556	downregulated	2	0.666547	0.5135
regulation of cilium assembly	GO	5 out of 8	0.885691	upregulated	5	1.66961	0.1883	downregulated	2	1.46987	0.23	downregulated	9	2.21826	0.1088	downregulated	3	0.493023	0.6108	upregulated	1	0.584525	0.5574	downregulated	4	1.78544	0.1677	upregulated	10	0.764237	0.4657	downregulated	10	2.85879	0.0573
RNA localization	GO	2 out of 8	0.860331	downregulated	3	0.25203	0.7772	upregulated	10	2.23661	0.1068	downregulated	21	6.24716	0.0019	downregulated	16	8.39439	0.0002	upregulated	2	1.59029	0.2039	downregulated	12	0.98732	0.3726	downregulated	9	0.659651	0.517	upregulated	17	0.917017	0.3997
fatty acid metabolic process	GO	4 out of 8	0.858777	downregulated	11	4.5038	0.0111	upregulated	15	3.58242	0.0278	upregulated	15	7.43596	0.0006	downregulated	14	6.36581	0.0017	upregulated	4	1.27774	0.2787	downregulated	16	1.1593	0.3137	downregulated	17	1.08386	0.3383	upregulated	18	1.97297	0.139
RNA polymerase III activity	GO	2 out of 8	0.852281	downregulated	1	1.33916	0.2621	upregulated	1	1.34281	0.2611	downregulated	1	1.40975	0.2442									downregulated	1	0.55382	0.5747
regulation of histone H3-K9 acetylation	GO	4 out of 8	0.848202	downregulated	1	2.83185	0.0589	upregulated	1	1.69576	0.1835	downregulated	2	2.02397	0.1321									upregulated	1	0.33552	0.715	upregulated	1	0.189376	0.8275	downregulated	4	2.83676	0.0586
ciliary tip	GO	4 out of 8	0.840896					upregulated	4	3.8227	0.0219	upregulated	2	4.11796	0.0163					upregulated	1	0.947591	0.3877	upregulated	3	1.33831	0.2623	upregulated	6	3.17225	0.0419	upregulated	4	3.3234	0.036
vacuolar lumen	GO	1 out of 8	0.838759	upregulated	4	0.643432	0.5255	upregulated	8	2.71827	0.066	downregulated	23	12.5607	3.5e-06	downregulated	18	17.4534	2.6e-08	downregulated	1	0.0143593	0.9857	downregulated	3	0.0167008	0.9834	downregulated	4	0.040515	0.9603	upregulated	3	0.910334	0.4024
oxidoreductase activity, acting on paired donors, with incorporation or reduction of molecular oxygen, reduced flavin or flavoprotein as one donor, and incorporation of one atom of oxygen	GO	3 out of 8	0.837541	downregulated	1	1.11047	0.3294					downregulated	1	0.772558	0.4618									downregulated	1	0.998802	0.3683	upregulated	1	1.27355	0.2798	downregulated	2	1.32023	0.2671
oxidoreductase activity, acting on NAD(P)H	GO	2 out of 8	0.796634	upregulated	3	0.346596	0.7071	upregulated	2	0.874883	0.4169	downregulated	8	1.65996	0.1901	downregulated	7	5.16653	0.0057	downregulated	3	0.724756	0.4844	downregulated	8	2.24566	0.1059	downregulated	6	0.901554	0.4059	downregulated	4	1.81129	0.1634
mitotic spindle	GO	5 out of 8	0.785021	upregulated	10	4.51682	0.0109	downregulated	2	2.96936	0.0513	downregulated	11	2.8124	0.0601	downregulated	6	1.51375	0.2201	upregulated	2	1.13987	0.3199	downregulated	4	1.58591	0.2048	upregulated	8	0.63411	0.5304	downregulated	2	2.18174	0.1128
transcription corepressor activity	GO	2 out of 8	0.774754	upregulated	15	1.61408	0.1991	upregulated	4	1.82962	0.1605	upregulated	6	0.93237	0.3936	upregulated	2	1.34834	0.2597	downregulated	11	2.59314	0.0748	upregulated	21	3.5876	0.0277	upregulated	25	1.56335	0.2094	downregulated	15	1.78305	0.1681
regulation of protein K63-linked ubiquitination	GO	4 out of 8	0.765595									upregulated	1	3.33633	0.0356	downregulated	1	1.35907	0.2569					upregulated	1	1.05553	0.348	upregulated	1	0.779638	0.4586	upregulated	1	0.907679	0.4035
muscle fiber development	GO	2 out of 8	0.758946	upregulated	1	3.47432	0.031	upregulated	2	2.12043	0.12	downregulated	3	4.90936	0.0074	downregulated	1	3.99856	0.0183	downregulated	1	0.713823	0.4898	downregulated	1	1.20248	0.3004	downregulated	1	1.08793	0.3369	downregulated	5	1.67042	0.1882
proton-transporting V-type ATPase complex	GO	3 out of 8	0.758708	upregulated	1	0.394074	0.6743									downregulated	1	0.667563	0.513	downregulated	1	0.798114	0.4502	upregulated	1	0.575144	0.5626	upregulated	1	0.708189	0.4925
apicolateral plasma membrane	GO	3 out of 8	0.73551					upregulated	1	1.61407	0.1991	upregulated	1	1.12946	0.3232					upregulated	1	1.26013	0.2836	upregulated	2	0.787226	0.4551	upregulated	2	1.43169	0.2389
blastocyst growth	GO	1 out of 8	0.706595	upregulated	1	1.72983	0.1773	upregulated	1	3.17221	0.0419																					upregulated	1	0.706595	0.4933
regulation of phospholipid metabolic process	GO	4 out of 8	0.704458	upregulated	2	2.20582	0.1102	upregulated	5	5.22628	0.0054	downregulated	9	4.78515	0.0084	downregulated	5	4.7487	0.0087	upregulated	2	0.686693	0.5032	upregulated	5	0.70665	0.4933	downregulated	4	0.655546	0.5192	downregulated	3	2.13508	0.1182
protein membrane anchor	GO	2 out of 8	0.695991					upregulated	1	2.04582	0.1293	downregulated	1	1.63445	0.1951	downregulated	1	1.10736	0.3304
positive regulation of receptor binding	GO	2 out of 8	0.684232	downregulated	1	2.66811	0.0694					downregulated	1	1.4456	0.2356	upregulated	1	3.42947	0.0324
skeletal muscle cell differentiation	GO	5 out of 8	0.679899	upregulated	4	6.54873	0.0014					downregulated	4	1.94242	0.1434	downregulated	3	3.07761	0.0461	upregulated	2	1.99315	0.1363	downregulated	2	1.82752	0.1608	upregulated	2	0.657466	0.5182	upregulated	1	1.38551	0.2502
mRNA cleavage factor complex	GO	1 out of 8	0.660029	upregulated	2	1.27409	0.2797	upregulated	1	0.684512	0.5043	downregulated	3	1.50301	0.2225	downregulated	1	1.13293	0.3221									upregulated	4	1.28327	0.2771	downregulated	1	0.623241	0.5362
sperm flagellum	GO	4 out of 8	0.655568	upregulated	3	1.0456	0.3515	upregulated	4	1.9993	0.1354	upregulated	3	2.28091	0.1022	upregulated	1	2.59616	0.0746	upregulated	3	2.81787	0.0597	upregulated	7	1.59103	0.2037	upregulated	10	3.67471	0.0254	upregulated	3	0.493921	0.6102
phosphatidylglycerol binding	GO	2 out of 8	0.644286	upregulated	1	1.33048	0.2644																					upregulated	1	0.343422	0.7093	upregulated	1	1.63134	0.1957
mitochondrial outer membrane	GO	2 out of 8	0.624514	downregulated	4	0.988315	0.3722	upregulated	7	3.0555	0.0471	downregulated	11	4.8292	0.008	downregulated	7	2.41123	0.0897	downregulated	9	3.47855	0.0309	downregulated	16	2.79797	0.0609	upregulated	16	2.7887	0.0615	upregulated	12	1.31436	0.2686
positive regulation of transcription of nucleolar large rRNA by RNA polymerase I	GO	2 out of 8	0.623021					upregulated	1	1.1008	0.3326	downregulated	1	0.612888	0.5418	downregulated	1	1.11093	0.3293
basement membrane	GO	2 out of 8	0.612241	downregulated	3	2.74669	0.0641	upregulated	2	1.68035	0.1863	downregulated	6	2.42219	0.0887	downregulated	2	0.446461	0.6399	downregulated	2	1.21685	0.2962	upregulated	6	1.41247	0.2435	upregulated	7	1.69596	0.1834	downregulated	3	1.27934	0.2782
cyclin binding	GO	4 out of 8	0.597663	upregulated	2	1.38623	0.25	downregulated	2	2.4621	0.0853	upregulated	2	1.16517	0.3119	upregulated	1	1.81494	0.1628	upregulated	1	1.72909	0.1774	upregulated	1	0.70582	0.4937	upregulated	1	0.0669985	0.9352	downregulated	1	1.21621	0.2964
negative regulation of glycoprotein metabolic process	GO	2 out of 8	0.591197	downregulated	1	3.78003	0.0228	upregulated	1	1.90649	0.1486	upregulated	1	2.26571	0.1038	downregulated	1	0.983362	0.3741
positive regulation of neutrophil migration	GO	2 out of 8	0.577548					upregulated	1	0.976983	0.3764	downregulated	5	6.26562	0.0019	downregulated	3	6.22514	0.002	downregulated	1	3.56147	0.0284	downregulated	2	2.68754	0.068	downregulated	2	2.28927	0.1013	downregulated	2	2.39794	0.0909
regulation of cell size	GO	3 out of 8	0.545681	upregulated	8	2.34804	0.0956	upregulated	6	0.934858	0.3926	downregulated	17	6.86542	0.001	downregulated	12	4.55115	0.0106	upregulated	3	2.54976	0.0781	downregulated	13	4.53514	0.0107	downregulated	17	3.15803	0.0425	downregulated	14	2.44458	0.0868
oxidoreductase activity, acting on the CH-NH group of donors	GO	4 out of 8	0.527639	downregulated	3	4.09535	0.0166	upregulated	1	1.50328	0.2224	upregulated	2	3.40491	0.0332	upregulated	1	1.9565	0.1414					upregulated	2	0.534799	0.5858	upregulated	2	0.563534	0.5692	upregulated	2	2.19864	0.111
acrosome assembly	GO	2 out of 8	0.526326					upregulated	2	2.43412	0.0877	upregulated	1	1.10829	0.3301	downregulated	1	1.202	0.3006	downregulated	1	0.860136	0.4231	upregulated	2	0.811962	0.444	upregulated	3	3.06707	0.0466	downregulated	3	2.49257	0.0827
desmosome organization	GO	2 out of 8	0.501905	upregulated	1	2.01684	0.1331					downregulated	1	1.25852	0.2841													upregulated	1	1.26022	0.2836
multicellular organismal movement	GO	3 out of 8	0.470548	downregulated	3	5.28185	0.0051	downregulated	1	1.22866	0.2927	upregulated	2	2.08713	0.124	upregulated	2	4.5843	0.0102	upregulated	1	2.44197	0.087	downregulated	4	1.99191	0.1364	downregulated	2	1.27425	0.2796	downregulated	2	0.536255	0.5849
musculoskeletal movement	GO	3 out of 8	0.470548	downregulated	3	5.28185	0.0051	downregulated	1	1.22866	0.2927	upregulated	2	2.08713	0.124	upregulated	2	4.5843	0.0102	upregulated	1	2.44197	0.087	downregulated	4	1.99191	0.1364	downregulated	2	1.27425	0.2796	downregulated	2	0.536255	0.5849
collagen-containing extracellular matrix	GO	5 out of 8	0.468389	downregulated	7	2.3905	0.0916	upregulated	6	1.40656	0.245	upregulated	7	4.18556	0.0152	upregulated	1	0.660962	0.5164	upregulated	3	0.992929	0.3705	upregulated	18	1.56137	0.2098	upregulated	17	1.19537	0.3026	upregulated	10	0.581297	0.5592
motile cilium assembly	GO	2 out of 8	0.458634	upregulated	1	0.584454	0.5574					upregulated	1	1.16088	0.3132	upregulated	1	1.93216	0.1448					upregulated	3	1.00606	0.3657	upregulated	6	4.13998	0.0159	downregulated	2	1.00992	0.3642
transcriptional repressor activity, RNA polymerase II transcription factor binding	GO	3 out of 8	0.453462					upregulated	2	4.6648	0.0094	upregulated	1	2.00977	0.134	downregulated	2	3.46723	0.0312					upregulated	3	2.24293	0.1061	upregulated	2	2.4249	0.0885	downregulated	2	1.00703	0.3653
positive regulation of amyloid precursor protein catabolic process	GO	2 out of 8	0.424845									downregulated	1	1.81978	0.1621	downregulated	2	3.20684	0.0405	downregulated	1	2.26938	0.1034	downregulated	1	2.33239	0.0971
double-stranded RNA binding	GO	1 out of 8	0.423065	upregulated	5	1.16891	0.3107	upregulated	4	3.20404	0.0406	downregulated	6	3.65484	0.0259	downregulated	6	2.37814	0.0927	downregulated	2	0.224508	0.7989	downregulated	3	0.747318	0.4736	upregulated	9	1.13926	0.3201	downregulated	8	0.491692	0.6116
regulation of RIG-I signaling pathway	GO	2 out of 8	0.399685					upregulated	1	3.17221	0.0419	downregulated	3	3.57893	0.0279	downregulated	1	1.18376	0.3061									downregulated	2	1.19079	0.304
positive regulation of DNA-templated transcription, initiation	GO	5 out of 8	0.377059	upregulated	3	3.57605	0.028	upregulated	1	1.19592	0.3024	downregulated	2	0.718395	0.4875	downregulated	2	2.09642	0.1229	downregulated	2	1.59134	0.2037	upregulated	3	1.83906	0.159	upregulated	4	1.50176	0.2227	upregulated	3	0.584744	0.5572
iron-sulfur cluster binding	GO	5 out of 8	0.37454	upregulated	3	1.10913	0.3298	upregulated	1	4.1292	0.0161	downregulated	6	1.88932	0.1512	downregulated	3	1.57767	0.2065	downregulated	1	0.247814	0.7805	upregulated	3	0.59698	0.5505	upregulated	3	0.590196	0.5542	upregulated	6	1.20652	0.2992
spindle elongation	GO	5 out of 8	0.369167	upregulated	1	0.875201	0.4168	upregulated	1	4.47555	0.0114	downregulated	1	0.717273	0.4881	downregulated	1	1.18101	0.307					upregulated	2	2.2637	0.104	upregulated	1	0.410041	0.6636	upregulated	1	1.14789	0.3173
interleukin-6 production	GO	2 out of 8	0.361916					upregulated	1	1.47968	0.2277	downregulated	1	1.16818	0.3109									downregulated	1	0.648432	0.5229					upregulated	1	1.32185	0.2666
telomere cap complex	GO	1 out of 8	0.351188	upregulated	2	2.12428	0.1195	upregulated	1	2.59017	0.075					downregulated	1	1.63858	0.1943									upregulated	1	0.351188	0.7039
regulation of membrane permeability	GO	4 out of 8	0.341307	downregulated	4	2.06615	0.1267	downregulated	1	0.559117	0.5717	downregulated	6	2.7078	0.0667	upregulated	1	1.59532	0.2028	upregulated	1	1.54661	0.213	downregulated	4	1.65638	0.1908	downregulated	5	2.37031	0.0935	downregulated	3	0.916363	0.4
transaminase activity	GO	3 out of 8	0.337623									upregulated	1	2.92732	0.0535					upregulated	1	1.62166	0.1976	downregulated	1	1.58392	0.2052	upregulated	2	1.48885	0.2256	upregulated	1	1.73836	0.1758
antigen processing and presentation of peptide or polysaccharide antigen via MHC class II	GO	3 out of 8	0.243043	upregulated	3	5.46995	0.0042	upregulated	7	3.46771	0.0312	downregulated	16	23.9354	4e-11	downregulated	14	24.9582	1.4e-11	upregulated	1	0.89083	0.4103	upregulated	6	1.21134	0.2978	upregulated	4	0.918613	0.3991	downregulated	6	2.77774	0.0622
nucleotide-binding domain, leucine rich repeat containing receptor signaling pathway	GO	3 out of 8	0.225901	upregulated	1	0.908993	0.4029	upregulated	1	0.598244	0.5498	downregulated	2	0.750393	0.4722	downregulated	1	0.794722	0.4517									upregulated	2	0.188024	0.8286	upregulated	1	0.293027	0.746
regulation of protein secretion	GO	3 out of 8	0.212706	downregulated	12	2.25698	0.1047	upregulated	11	2.35297	0.0951	upregulated	10	2.01992	0.1327	downregulated	19	8.91908	0.0001	downregulated	13	3.16313	0.0423	downregulated	31	4.10901	0.0164	upregulated	28	5.5211	0.004	downregulated	21	4.83942	0.0079
nuclear pore nuclear basket	GO	1 out of 8	0.205799													downregulated	1	1.19715	0.3021					downregulated	1	0.991347	0.3711
homologous recombination	GO	4 out of 8	0.180586	upregulated	2	0.951561	0.3861	upregulated	3	1.79158	0.1667	downregulated	2	1.34121	0.2615	downregulated	2	2.36823	0.0936	downregulated	1	0.434253	0.6477	upregulated	1	0.340993	0.7111	downregulated	3	0.886158	0.4122	upregulated	1	0.193703	0.8239
reciprocal meiotic recombination	GO	4 out of 8	0.180586	upregulated	2	0.951561	0.3861	upregulated	3	1.79158	0.1667	downregulated	2	1.34121	0.2615	downregulated	2	2.36823	0.0936	downregulated	1	0.434253	0.6477	upregulated	1	0.340993	0.7111	downregulated	3	0.886158	0.4122	upregulated	1	0.193703	0.8239
regulation of renal sodium excretion	GO	4 out of 8	0.174649					upregulated	1	3.65017	0.026	upregulated	3	3.97414	0.0188	upregulated	2	5.33728	0.0048	upregulated	1	2.85363	0.0576	upregulated	1	3.14722	0.043	upregulated	2	2.9561	0.052	upregulated	2	4.17928	0.0153
regulation of neuroblast proliferation	GO	4 out of 8	0.15887	downregulated	2	3.48201	0.0307	upregulated	3	6.04625	0.0024	upregulated	1	1.11932	0.3265	upregulated	1	1.83164	0.1602	downregulated	3	3.11044	0.0446	upregulated	3	2.59844	0.0744	upregulated	3	2.58447	0.0754	upregulated	2	3.60159	0.0273
regulation of RNA polymerase II regulatory region sequence-specific DNA binding	GO	4 out of 8	0.155816					upregulated	1	4.36756	0.0127					downregulated	1	1.3975	0.2472					upregulated	1	0.945512	0.3885	upregulated	2	1.50233	0.2226	upregulated	1	0.678042	0.5076
regulation of telomere capping	GO	3 out of 8	0.137218	upregulated	2	2.48933	0.083	upregulated	1	1.19592	0.3024	downregulated	2	2.38334	0.0922	downregulated	1	2.02163	0.1324	downregulated	1	0.511099	0.5998	downregulated	1	0.533239	0.5867	downregulated	1	0.691115	0.501	upregulated	3	1.15296	0.3157
cellular response to reactive nitrogen species	GO	5 out of 8	0.0970214	upregulated	2	2.85698	0.0574	upregulated	2	3.01635	0.049	upregulated	2	2.03211	0.1311	downregulated	3	2.67051	0.0692	upregulated	1	1.24532	0.2878	upregulated	1	2.34994	0.0954	upregulated	2	1.18805	0.3048	upregulated	1	0.54864	0.5777
phosphatidylinositol monophosphate phosphatase activity	GO	4 out of 8	0.0955282	upregulated	1	0.668441	0.5125					downregulated	2	2.55084	0.078	upregulated	1	3.19648	0.0409					upregulated	1	0.46198	0.63	upregulated	1	0.196857	0.8213	upregulated	2	0.750763	0.472
ATP-dependent microtubule motor activity, plus-end-directed	GO	4 out of 8	0.0764127					upregulated	1	1.74748	0.1742	downregulated	2	0.719213	0.4871	downregulated	1	0.710085	0.4916	downregulated	1	1.87173	0.1539	upregulated	3	3.18565	0.0414	upregulated	4	4.40417	0.0122	downregulated	3	5.32349	0.0049
dopamine metabolic process	GO	3 out of 8	0.0743809	upregulated	2	1.05859	0.3469	upregulated	1	2.67716	0.0688	downregulated	2	3.50457	0.0301	downregulated	2	2.6931	0.0677	downregulated	2	3.22125	0.0399	upregulated	2	3.26435	0.0382	upregulated	2	2.68486	0.0682	downregulated	1	1.85115	0.1571
response to molecule of bacterial origin	GO	1 out of 8	0.0710543	downregulated	9	3.6961	0.0248	upregulated	6	4.77878	0.0084	downregulated	27	7.49876	0.0006	downregulated	20	8.33721	0.0002	downregulated	9	1.65568	0.191	downregulated	11	0.863434	0.4217	upregulated	12	2.53953	0.0789	downregulated	9	0.812793	0.4436
detection of light stimulus involved in sensory perception	GO	2 out of 8	0.0647629	upregulated	1	2.02349	0.1322					downregulated	1	1.94832	0.1425	downregulated	1	1.876	0.1532					downregulated	1	0.694163	0.4995	downregulated	1	1.0419	0.3528
NAD binding	GO	4 out of 8	0.0414974	downregulated	1	1.5744	0.2071	upregulated	2	0.916277	0.4	upregulated	2	1.66204	0.1898	upregulated	2	4.59994	0.0101					upregulated	3	0.519699	0.5947	upregulated	4	1.11547	0.3278	upregulated	3	2.34815	0.0955
cytochrome-c oxidase activity	GO	2 out of 8	0.0242515	upregulated	1	1.46654	0.2307	upregulated	2	2.30734	0.0995	upregulated	1	0.93659	0.392					downregulated	1	1.20343	0.3002	downregulated	2	1.34444	0.2607	upregulated	1	1.13005	0.323	upregulated	1	1.44207	0.2364
